# Supplementary material for: Interactions between temperature and energy supply drive microbial communities in hydrothermal sediment
Source: Springer Nature journal article supplement (doi:10.1038/s42003-021-02507-1), 2021-08-25
Supplement: MOESM3 [file 42003_2021_2507_MOESM3_ESM.pdf]

### **Description of Additional Supplementary Files**

File Name: Supplementary Data 1

Description: Overviews of all geochemical and quantitative PCR data.

File Name: Supplementary Data 2

Description: Phylogenetic summary tables of Bacteria, Archaea, and specifically methane-cycling archaea.

File Name: Supplementary Data 3

Description: Read contributions of phylogenetically annotated bacterial ZOTUs across all samples.

File Name: Supplementary Data 4

Description: Read contributions of phylogenetically annotated archaeal ZOTUs across all samples.
