# Supplementary material for: Interactions between temperature and energy supply drive microbial communities in hydrothermal sediment
Source: Commun Biol. 2021 Aug 25;4:1006. doi: 10.1038/s42003-021-02507-1 (PMC8387401; doi:10.1038/s42003-021-02507-1)
Supplement: Supplementary file 4 — Supplementary Data 1 [file 42003_2021_2507_MOESM4_ESM.xlsx]

## Sheet: Temperature
NON-SEEP AREA (NSA)															SEEP AREA (SA)
Sampled in 2015 using gravity cores and multi-cores															Sampled in 2009 by Alvin using push cores												Sampled in 1998 by Alvin using push cores
MUC02 (St. 15) (Ctrl)			GC13 (St. 9) (Ctrl)			MUC12 (St. 40) (Ctrl)			GC09 (St. 51)			GC10 (St. 58)			Cold site (Ctrl)			Yellow Mat			Orange mat			Cathedral Hill			Everest Mound
															4567 CS LC3			4563 YM LC1			4564 OM LC15			4565 HF 5
depth (cm)	T (°C)	T gradient (°C m-1)	depth (cm)	T (°C)	T gradient (°C m-1)	depth (cm)	T (°C)	T gradient (°C m-1)	depth (cm)	T (°C)	T gradient (°C m-1)	depth (cm)	T (°C)	T gradient (°C m-1)	depth (cm)	T (°C)	T gradient (°C m-1)	depth (cm)	T (°C)	T gradient (°C m-1)	depth (cm)	T (°C)	T gradient (°C m-1)	depth (cm)	T (°C)	T gradient (°C m-1)	depth (cm)	T (°C)	T gradient (°C m-1)
stays at 3-4°C		0.1	stays at 3-4°C		0.1	0	2.879	2.7	0	9	11.4	0	9	9.9	10	3.2	2.2	0	3.15	57.32	0	11.9	165	-2	3.3	300	-2	2	490
		0.1			0.1	10	3.1453	2.7	60	24.7968	11.4	100	28.857	9.9	20	3.4	2.2	10	7.71	57.32	5	38	165	8	27	300	5	22	490
		0.1			0.1	20	3.4116	2.7	150	34.992	11.4	200	38.714	9.9	30	3.6	2.2	20	13.28	57.32	10	52.9	165	18	63	300	10	60	490
		0.1			0.1	30	3.6779	2.7	240	45.1872	11.4	300	48.571	9.9	40	3.8	2.2	30	18.13	57.32	15	75.9	165	28	97.5	300	15	80	490
		0.1			0.1	40	3.9442	2.7	330	55.3824	11.4	400	58.428	9.9	50	4.1	2.2	40	26.6	57.32	20	76.7	165	38	118.2	300	20	109	490
		0.1			0.1				330	55.3824	11.4	470	65.3279	9.9							25	88.2	165
		0.1			0.1				400	63.312	11.4			9.9							30	93	165
									470	71.2416	11.4			9.9							35	95.4	165
																					40	95	165
																					45	89.4	165

## Sheet: DIC
NON-SEEP AREA (NSA)															SEEP AREA (SA)
Sampled in 2015 using gravity cores and multi-cores															Sampled in 2009 by Alvin using push cores												Sampled in 1998 by Alvin using push cores
MUC02 (St. 15) (Ctrl)			GC13 (St. 9) (Ctrl)			MUC12 (St. 40) (Ctrl)			GC09 (St. 51)			GC10 (St. 58)			Cold site (Ctrl)			Yellow Mat			Orange mat			Cathedral Hill			Everest Mound
															4567 CS LC3			4563 YM LC1			4564 OM LC15			4565 HF 5
depth (cm)	DIC (mM)	δ13C-DIC	depth (cm)	DIC (mM)	δ13C-DIC	depth (cm)	DIC (mM)	δ13C-DIC	depth (cm)	DIC (mM)	δ13C-DIC	depth (cm)	DIC (mM)	δ13C-DIC	depth (cm)	DIC (mM)	δ13C-DIC	depth (cm)	DIC (mM)	δ13C-DIC	depth (cm)	DIC (mM)	δ13C-DIC	depth (cm)	DIC (mM)	δ13C-DIC	depth (cm)	DIC (mM)	δ13C-DIC
0	2.42029	-0.49525	21	2.48633	-0.55125	0	2.47746	-0.41075	10	2.76786	-0.65	20	2.76786	-0.53475	0	2.544	-3.3	-1.5	4.05958	-3.11	0	3.56839	-6.94	1.5	23.2168	-5.93
0.5	2.55369		210	2.63816		0.5	2.43934		30	2.73095	-0.56325	45			1.5	3.64373	-3.2	1.5	10.1955	-19.21	1.5	6.11652	-13.41	4.5	26.5836	-4.75	not determined
1.5	2.62992		240	2.71408		1.5	2.43934		50	2.73095	-0.635	70	2.73095	-1.059	4.5	5.49205	-3.6	4.5	4.64704	-21.69	4.5	6.66734	-15.71	7.5	26.6205	-4.49
2.5	2.74426		265	2.80898	-0.94825	2.5	2.5918	-0.352	70	2.84167	-0.6465	120	2.73095	-0.96975	7.5	3.15319	-4.8	7.5	16.3956	-20.37	7.5	10.9349	-18.06	10.5	18.7032	-0.6
3.5	2.74426	-0.194	290	2.9798		3.5	2.66803		93	2.95238		145			10.5	4.92952	-6.2	10.5	14.513	-22.29	10.5	10.898	-16.63	13.5	23.2051	-2.78
4.5	2.74426		320	2.92286	-1.70975	4.5	2.66803		110	2.87857		170	2.84167		13.5	4.0221	-8	13.5	13.9435	-19.97	13.5	12.9757	-17.81	16.5	20.3121	-2.57
5.5	2.70615		360	3.16959		6	2.62992	-0.389	130	2.95238	-0.82975	210	2.95238	-1.10625	16.5	4.01875	-8.9	16.5	14.4231	-21.21	16.5	13.2051	-17.19	19.5	27.7455	-3.93
7	2.70615	-0.4265	400	3.11265	-1.6685	8	2.74426		150	3.13691		225			19.5	6.00603	-8.8	19.5	18.2672	-23.85	19.5	13.7207	-14.36	22.5	27.841	-4.16
9	2.74426		450	3.83388		10	2.78238		170	3.13691		240	2.87857		22.5	6.20526	-10.3	22.5	20.4539	-24.82				25.5	23.2068	-3.26
11	2.78238		500	4.13755	-4.519	12.5	2.89672	-0.38675	193	3.21071	-0.91925	255						25.5	22.405	-24.97				28.5	24.7403	-3.49
13	2.74426	-0.513	545	4.93469		15.5	2.93484		210	3.28452		270	2.95238	-1.1465				28.5	19.7587	-25.07				31.5	23.7308	-3.74
15.5	2.82049					18.5	2.97295		230	3.35833		285						31.5	20.3924	-25.08				34.5	21.6698	-3.15
18.5	2.89672	-0.572				22	3.01106	-0.54675	250	3.43214		310	3.13691					34.5	23.1763	-24.84				37.5	15.9106	-3.25
22	2.93484					26	2.93484		270	3.61667	-1.30475	325						37.5	19.3806	-24.8				40.5	15.9324	-3.02
26	3.04918								290	3.61667		340	3.13691	-1.479				40.5	19.6501	-24.33				43.5	15.6896	-2.55
30	3.16352	-0.429							306	3.54286		355
									320	3.50595		370	3.21071	-1.658
									340	3.57976	-0.95	385
									355	3.54286		410	3.28452
									370	3.43214		430	3.35833
									390	3.57976	-1.03225	450	3.43214
									400	3.35833	-0.91875	470	3.61667	-1.654
									410	3.35833
									420	3.02619	-1.182
									435	3.17381
									450	2.76786	-0.94225
									460	2.65714
									470	2.76786	-0.857

## Sheet: Sulfate
NON-SEEP AREA (NSA)										SEEP AREA (SA)
Sampled in 2015 using gravity cores and multi-cores										Sampled in 2009 by Alvin using push cores								Sampled in 1998 by Alvin using push cores
MUC02 (St. 15) (Ctrl)		GC13 (St. 9) (Ctrl)		MUC12 (St. 40) (Ctrl)		GC09 (St. 51)		GC10 (St. 58)		Cold site (Ctrl)		Yellow Mat		Orange mat		Cathedral Hill		Everest Mound
										4567 CS LC3		4563 YM LC1		4564 OM LC15		4565 HF 5
depth (cm)	Sulfate (mM)	depth (cm)	Sulfate (mM)	depth (cm)	Sulfate (mM)	depth (cm)	Sulfate (mM)	depth (cm)	Sulfate (mM)	depth (cm)	Sulfate (mM)	depth (cm)	Sulfate (mM)	depth (cm)	Sulfate (mM)	depth (cm)	Sulfate (mM)	depth (cm)	Sulfate (mM)
0.5	28.39	21	28.82	0	28.5	10	28.4	45	27.73	0	26.3076	-1.5	26.5739	0	22.3834	1.5	6.16935	-1.5	28.9
1.5	28.38	210	28.85	0.5	28.5	30	28.3	145	26.59	1.5	24.6599	1.5	21.8543	1.5	21.6186	4.5	0.394271	0.5	4.7
2.5	28.71	240	28.8	1	28.6	50	28.1	210	28.35	4.5	26.0864	4.5	19.9413	4.5	19.9276	7.5	0.10868	1.5	3.6
3.5	28.47	265	28.68	1.5	28.3	93	28.1	225	28.41	7.5	25.3369	7.5	19.3598	7.5	18.9692	10.5	0.0649588	2.5	2.3
7	28.35	290	28.75	2.5	28.5	110	27.9	240	28.2	10.5	24.5767	10.5	17.2363	10.5	17.2024	13.5	0.0754994	3.5	0.7
9	28.37	360	28.83	3	28.8	130	27.9	255	28.35	13.5	25.9225	13.5	19.1713	13.5	17.6319	16.5	0.0672421	4.5	bd
11	28.04	400	28.36	3.5	28.3	150	27.8	285	27.45	16.5	23.493	16.5	17.6202	16.5	16.8955	19.5	0.0824036	5.5	bd
13	28.48	450	27.46	4.5	28.4	193	27.8	310	28.34	19.5	23.5299	19.5	14.1717	19.5	16.1424	22.5	0.247187	7.5	bd
22	28.11	500	27.11	6	28.7	210	28.2	325	28.33	22.5	23.6143	22.5	11.4393			25.5	0.538728	9.5	bd
26	28.14	545	26.78	6	28.3	230	28	340	28.09			25.5	9.79838			28.5	0.786736	11.5	bd
30	27.91			8	28.5	250	28	355	28.22			28.5	10.2844			31.5	0.970625	13.5	bd
				10	28.3	290	28.2	385	27.94			31.5	10.4862			34.5	1.13525	15.5	bd
				12.5	28.5	340	29.2	410	28.13			34.5	10.3003			37.5	4.10819	17.5	bd
				14	28.4	355	27.4	430	28.03			37.5	5.95687			40.5	6.53088	19.5	bd
				15.5	28.4	390	27.9	450	27.87			40.5	10.9288			43.5	5.61024
				18.5	28.3	400	27.6
				22	28.3	410	27.1
				22	28.1	435	26.6
				26	28.2	450	26.4
						460	26.4
		bd: below detection
Data from MUC02, GC13, GC09, and GC10 were previously published Geilert et al. (2018) On the formation of hydrothermal vents and cold seeps in the Guaymas Basin, Gulf of California. Biogeosciences 2018; 15: 5715-5731.

## Sheet: Sulfide
NON-SEEP AREA (NSA)										SEEP AREA (SA)
Sampled in 2015 using gravity cores and multi-cores										Sampled in 2009 by Alvin using push cores								Sampled in 1998 by Alvin using push cores
MUC02 (St. 15) (Ctrl)		GC13 (St. 9) (Ctrl)		MUC12 (St. 40) (Ctrl)		GC09 (St. 51)		GC10 (St. 58)		Cold site (Ctrl)		Yellow Mat		Orange mat		Cathedral Hill		Everest Mound
										4567 CS LC3		4573 YM L23		4564 OM LC15		4565 HF 5
depth (cm)	Sulfide (µM)	depth (cm)	Sulfide (µM)	depth (cm)	Sulfide (µM)	depth (cm)	Sulfide (µM)	depth (cm)	Sulfide (µM)	depth (cm)	Sulfide (µM)	depth (cm)	Sulfide (µM)	depth (cm)	Sulfide (µM)	depth (cm)	Sulfide (µM)	depth (cm)	Sulfide (µM)
0	0	21	0			10	0	20	0	0	2500	-1.5	69	0	3570
0.5	0	210	0	not determined		30	0	45	0	1.5	3600	1.5	160	1.5	6120	1.5	1600	not determined
1.5	0	240	0			50	0	70	1.3	4.5	5500	4.5	0	4.5	6670	4.5	1700
2.5	0	265	1.2			70	0	120	0.2	7.5	3200	7.5	97	7.5	10930	7.5	1200
3.5	0	290	3.9			93	0	145	0	10.5	4900	10.5	10	10.5	10900	10.5	1200
4.5	0	320	0			110	0	170	0	13.5	4000	13.5	8	13.5	12980	13.5	1300
5.5	0	360	6.7			130	0	210	0	16.5	4000	16.5	0	16.5	13210	16.5	1100
7	0	400	0.1			150	0	225	0	19.5	6000	19.5	10	19.5	13720	19.5	1200
9	0	450	6.2			170	0	240	0.8	22.5	6200	22.5	77			22.5	1000
11	0	500	52			193	0	255	0			25.5	0			25.5	900
13	0	545	78			210	0	270	0			28.5	0			28.5	1000
15.5	0					230	9.4	285	0							31.5	1100
18.5	0					250	3.6	310	0.2							34.5	1000
22	4.9					270	6.9	325	0							37.5	500
26	23					290	1.9	340	2.7							40.6	700
30	11					306	2.5	355	0							43.5	800
						320	1.6	370	1.9
						340	0	385	0
						355	0	410	2.2
						370	0	430	2.3
						390	0	450	1.7
						400	0	470	2.4
						410	0
						420	0
						435	0
						450	0
						460	0
						470	0
Data from MUC02, GC13, GC09, and GC10 were previously published Geilert et al. (2018) On the formation of hydrothermal vents and cold seeps in the Guaymas Basin, Gulf of California. Biogeosciences 2018; 15: 5715-5731.

## Sheet: VFAs
NON-SEEP AREA (NSA)																									SEEP AREA (SA)
Sampled in 2015 using gravity cores and multi-cores																									Sampled in 2009 by Alvin using push cores																				Sampled in 1998 by Alvin using push cores
MUC02 (St. 15) (Ctrl)					GC13 (St. 9) (Ctrl)					MUC12 (St. 40) (Ctrl)					GC09 (St. 51)					GC10 (St. 58)					Cold site (Ctrl)					Yellow Mat					Orange mat					Cathedral Hill					Everest Mound
																									4567 CS LC3					4563 YM LC1					4564 OM LC15					4565 HF 5
Glombitza et al. (2014) method					Glombitza et al. (2014) method					Glombitza et al. (2014) method					Glombitza et al. (2014) method					Glombitza et al. (2014) method					Albert & Martens (1997) method					Glombitza et al. (2014) method					Albert & Martens (1997) method					Albert & Martens (1997) method					Glombitza et al. (2014) method
depth (cm)	formate (µM)	acetate (µM)	propionate (µM)	lactate (µM)	depth (cm)	formate (µM)	acetate (µM)	propionate (µM)	lactate (µM)	depth (cm)	formate (µM)	acetate (µM)	propionate (µM)	lactate (µM)	depth (cm)	formate (µM)	acetate (µM)	propionate (µM)	lactate (µM)	depth (cm)	formate (µM)	acetate (µM)	propionate (µM)	lactate (µM)	depth (cm)	formate (µM)	acetate (µM)	propionate (µM)	lactate (µM)	depth (cm)	formate (µM)	acetate (µM)	propionate (µM)	lactate (µM)	depth (cm)	formate (µM)	acetate (µM)	propionate (µM)	lactate (µM)	depth (cm)	formate (µM)	acetate (µM)	propionate (µM)	lactate (µM)	depth (cm)	formate (µM)	acetate (µM)	propionate (µM)	lactate (µM)
1	0.364146	2.11331	0.217566	0	476	0.655201	1.44491	0.46724	bd	1	0	1.33328	0.180925	bd	487	1.22883	3.01834	1.06366	0	498	2.59546	3.92384	0.870266	0	0	0.329272	6.69835	0.467564	4.88695	0.5	6.3956	32.4089	1.82477	2.38183	0	0	2.97253	0.497082	0.6197	1.5	0	15.9586	0.644674	0.849475	0.5	170.835	151.205	21.3674	0
3	0.0952381	0.858131	0.338437	0	376	1.34316	2.08464	0.212382	bd	3	1.89461	5.35924	1.34402	bd	387	3.02038	3.01834	0.725222	0	448	2.82515	4.2489	0.870266	0	1.5	0	1.34475	0.294143	0.537638	5.5	6.97658	24.2992	0.674737	0.833955	1.5	0	12.1243	0.829164	1.73575	4.5	0	9.37516	0.792266	2.5892	1.5	94.1634	563.309	77.6079	0
6	1.01401	2.60001	0.507655	0	276	0.797161	1.73168	0.764575	bd	6	0.840734	3.29397	0.827087	bd	337	2.98593	4.36499	0.169218	0	398	2.12461	4.43464	0.846092	0	4.5	0.873738	1.88734	0	0.192975	10.5	5.23945	44.5955	1.14519	1.17838	4.5	0	9.66454	0.644674	1.1449	7.5	0	8.32614	0.644674	1.24338	2.5	119.001	653.549	108.35	0
14	0.431373	2.06208	0.435133	0	176	0.709801	1.44491	0.382287	bd	14	0.757845	1.46399	0.568622	bd	287	1.51593	3.69166	0.676873	0	348	2.22796	4.31855	0.362611	0	7.5	0	1.30858	0.426976	0	15.5	8.03826	77.5635	0.969826	0.544074	7.5	0.831856	10.3518	0.607776	1.4075	10.5	3.00972	18.2014	0.35318	1.83423	3.5	157.444	687.429	125.168	0
22	0.733894	2.62562	0.628525	0	76	0.720721	2.01846	1.14686	bd	22	0.426288	1.38556	1.08555	bd	237	2.74476	4.01672	1.08783	0	298	1.84898	4.2489	0.531829	0	10.5	0	3.29809	0.471253	0	20.5	7.24823	102.848	0.761375	0.567581	10.5	-0.005784	17.6588	1.16125	0.521225	13.5	2.1302	24.0614	0.165	0.751	4.5	101.507	637.586	123.541	0
32	0.957983	2.83055	0.435133	0	26	0.829921	2.41553	0.23362	bd						187	1.75711	4.27212	0.314263	0	248	3.05484	8.49779	0.918614	0	13.5	0	4.74501	0.308902	0	25.5	6.9056	126.749	1.44151	0.607135	13.5	1.04127	17.8396	1.16125	0.42275	16.5	-0.047666	19.5759	1.30884	1.34185	5.5	112.521	599.796	112.148	0
															137	1.5389	3.66845	0.386785	0	198	1.44703	5.08475	0.725222	0	16.5	0.119862	3.40661	0.53398	0.27832	30.5	7.72769	116.015	1.6513	0.633809	16.5	0	15.8139	1.53023	-0.0368	19.5	1.71138	41.0627	0.71847	0.6197	7.5	265	682.868	117.573	0
															87	0.97617	3.25052	0.797744	0	148	0.930233	4.36499	1.2087	0						35.5	6.01732	94.3136	1.2278	0.546136	19.5	0	10.3157	0.71847	0.55405	22.5	1.20879	67.9031	0.165	0.389925	9.5	125.912	589.697	105.999	0
																				98	0.597186	3.29696	0.290089	0											22.5	0.4968	11.1476	0.71847	0.215953	25.5	0.999384	141.334	1.64092	1.57163	12.5	151.613	574.711	102.925	0
																				48	1.13695	5.94381	1.18453	0											25.5	1.54385	8.83256	0.607776	0.586875	28.5	1.71138	127.914	10.7178	0.521225	15.5	104.53	617.225	119.924	0
																																			28.5	9.71084	19.3589	1.12435	0.751	31.5	2.75843	133.81	18.7616	0.324275	19.5	130.879	506.136	81.948	0
																																								34.5	14.1922	253.29	19.684	17.3276
																																								37.5	6.7791	120.318	20.8279	1.2762
																																								40.5	8.8732	126.576	21.7503	0.6197
																																								43.5	10.2972	119.594	21.0493	2.1953
			bd: below detection
																									0
																									0
																									0
																									0
																									0
																									0
																									0
																									0
																									0
																									0
																									0
																									0
																									0

## Sheet: Methane
NON-SEEP AREA (NSA)																				SEEP AREA (SA)
Sampled in 2015 using gravity cores and multi-cores																				Sampled in 2009 by Alvin using push cores																Sampled in 1998 by Alvin using push cores
MUC02 (St. 15) (Ctrl)				GC13 (St. 9) (Ctrl)				MUC12 (St. 40) (Ctrl)				GC09 (St. 51)				GC10 (St. 58)				Cold site (Ctrl)				Yellow Mat				Orange mat				Cathedral Hill				Everest Mound
																				4567 CS LC3				4563 YM LC1				4564 OM LC15				4565 HF 5
depth (cm)	CH4 (mM)	C1/(C2+C3)	δ13C-CH4	depth (cm)	CH4 (mM)	C1/(C2+C3)	δ13C-CH4	depth (cm)	CH4 (mM)	C1/(C2+C3)	δ13C-CH4	depth (cm)	CH4 (mM)	C1/(C2+C3)	δ13C-CH4	depth (cm)	CH4 (mM)	C1/(C2+C3)	δ13C-CH4	depth (cm)	CH4 (mM)	C1/(C2+C3)	δ13C-CH4	depth (cm)	CH4 (mM)	C1/(C2+C3)	δ13C-CH4	depth (cm)	CH4 (mM)	C1/(C2+C3)	δ13C-CH4	depth (cm)	CH4 (mM)	C1/(C2+C3)	δ13C-CH4	depth (cm)	CH4 (mM)	C1/(C2+C3)	δ13C-CH4
0.5	0.0111524	18.3389	ND	476	0.0223851	55.5	-67.3247	0.5	0.00130952	14.3333	ND	487	0.00315637	15.2882	ND	4.98	0.00403416	17.2857	-44.1514	1.5	0.00105549			0	0.1			0	0.000902949			1.5	2.89183
1.5	0.00460964	19.0665	ND	426	0.014442	43.5294	-55.3836	1.5	0.00273713	42	ND	437	0.0042456	10.1106	ND	4.48	0.00350072	13.125	ND	4.5	0.000969592			1.5	2.61627			1.5	0.846282			4.5	4.55788			not determined, but beyond saturation
2.5	0.00298994	14.3548	ND	376	0.0118007	32.2916	-48.5882	2.5	0.00230467	23.6667	ND	387	0.00273693	7.25209	ND	3.98	0.003234	10.7778	ND	7.5	0.00124746			4.5	2.82187			4.5	0.413237			7.5	4.72541
3.5	0.00289706	15.9535	ND	326	0.0134614	28.8422	-43.8647	3.5	0.00229084	24	ND	337	0.00184404	13.3736	ND	3.48	0.00290059	10.875	ND	10.5	0.00118545			7.5	2.83833			7.5	1.45246			10.5	5.20628
5	0.00203699	11.2555	ND	276	0.0112685	27.004	-42.2479	5	0.00187989	14.75	ND	287	0.00200878	9.55673	ND	2.98	0.00236715	17.75	ND	13.5	0.0016859			10.5	2.86962			10.5	2.04848			13.5	4.63137
7	0.00182662	9.30527	ND	226	0.00754523	22.5483	-34.6358	7	0.0022956	8.875	ND	237	0.00153389	11.4549	ND	2.48	0.00210043	9	ND	16.5	0.00133382			13.5	3.28581			13.5	2.83517			16.5	4.1043
9	0.00156217	13.7155	ND	176	0.00429024	13.2195	-33.8846	9	0.00221114	22.6667	ND	187	0.00169416	7.71062	ND	1.98	0.00200041	7.5	ND	19.5	0.00166013			16.5	2.74171			16.5	2.41508			19.5	3.70999
11	0.00144558	13.533	ND	126	0.00355202	12.9194	-27.4978	11	0.00227162	9.71429	ND	137	0.00156112	7.19759	ND	1.48	0.00166701	8.33333	ND	22.5	0.00289891			19.5	2.65879			19.5	2.76002			22.5	2.85073
13	0.00166143	14.0178	ND	76	0.00397589	11.0959	-45.6259	13	0.00189405	13	ND	87	0.00163198	4.72925	ND	0.98	0.00143363	8.6	ND					22.5	2.30655			22.5	1.71819			25.5	3.87529
15	0.0017124	8.55206	ND	26	0.00409769	14.284	-49.5384	15	0.00168191	12.75	ND	37	0.0015299	4.69888	ND	0.48	0.00160033	6.85714	ND					25.5	1.62219			25.5	1.57565			28.5	3.07982
17	0.00164986	8.30372	ND					17	0.00215711	15.25	ND													28.5	1.58892			28.5	2.1953			31.5	3.06074
19	0.00173111	8.81434	ND					19	0.00168621	12.25	ND													31.5	1.67847			31.5	0.224593			34.5	4.27377
22	0.00177894	5.80129	ND					22	0.0015497	11.25	ND													34.5	1.42622			34.5	2.61685			37.5	1.55097
26	0.00187413	14.9041	ND					26	0.00152412	14.6667	ND													37.5	1.5556			37.5	1.71048			40.5	1.80412
30	0.0021964	13.9427	ND					30	0.00190515	11	ND													40.5	1.61759							43.5	1.86252
34	0.00239554	15.2056	ND
38	0.00263704	16.8802	ND
	ND: not determined
Data from MUC02, GC13, GC09, and GC10 were previously published Geilert et al. (2018) On the formation of hydrothermal vents and cold seeps in the Guaymas Basin, Gulf of California. Biogeosciences 2018; 15: 5715-5731.

## Sheet: TOC, TN
NON-SEEP AREA (NSA)																									SEEP AREA (SA)
Sampled in 2015 using gravity cores and multi-cores																									Sampled in 2009 by Alvin using push cores																				Sampled in 1998 by Alvin using push cores
MUC02 (St. 15) (Ctrl)					GC13 (St. 9) (Ctrl)					MUC12 (St. 40) (Ctrl)					GC09 (St. 51)					GC10 (St. 58)					Cold site (Ctrl)					Yellow Mat					Orange mat					Cathedral Hill					Everest Mound
																									4567 CS LC3					4563 YM LC1					4564 OM LC15					4565 LC10
depth (cm)	TOC (wt %)	TN (wt %)	C/N	δ13C-TOC	depth (cm)	TOC (wt %)	TN (wt %)	C/N	δ13C-TOC	depth (cm)	TOC (wt %)	TN (wt %)	C/N	δ13C-TOC	depth (cm)	TOC (wt %)	TN (wt %)	C/N	δ13C-TOC	depth (cm)	TOC (wt %)	TN (wt %)	C/N	δ13C-TOC	depth (cm)	TOC (wt %)	TN (wt %)	C/N	δ13C-TOC	depth (cm)	TOC (wt %)	TN (wt %)	C/N	δ13C-TOC	depth (cm)	TOC (wt %)	TN (wt %)	C/N	δ13C-TOC	depth (cm)	TOC (wt %)	TN (wt %)	C/N	δ13C-TOC	depth (cm)	TOC (wt %)	TN (wt %)	C/N	δ13C-TOC
0.5	4.40032	0.532231	8.26767	-21.3	26	4.01439	0.456399	8.7958	-20.9267	0.5	4.52511	0.547311	8.2679	-22.1908	87	2.27456	0.274135	8.29724	-20.766	98	2.43595	0.251014	9.70441	-20.6743	1.5	3.4344	0.613981	5.59366	-20.2139	1.5	5.34127	0.690871	7.73122	-23.1944	1.5	16.16	0.905524	17.846	-20.5067	1.5	5.7228	0.67734	8.44892	-23.3231	0.5	6.38603	0.775157	8.23838	-21.0153
2.5	4.41017	0.536099	8.22641	-21.2	76	2.64508	0.288488	9.16877	-21.1969	2.5	3.19201	0.388763	8.2107	-21.792	187	2.09832	0.185915	11.2865	-20.6221	198	2.58732	0.241498	10.7137	-20.679	5.5	2.3263	0.532168	4.37137	-19.3796	5.5	4.1327	0.499456	8.27441	-21.2021	5.5	10.8608	0.57033	19.043	-20.9069	5.5	4.96879	0.563199	8.82245	-21.3049	1.5	5.00143	0.572998	8.72852	-21.0041
5	4.24386	0.515998	8.22457	-21	176	2.93182	0.329005	8.91118	-21.2352	5	3.27956	0.405985	8.07804	-21.4783	287	2.87722	0.240989	11.9392	-21.221	298	1.17929	0.0927728	12.7116	-20.8303	15.5	2.6312	0.495711	5.30792	-18.6592	10.5	3.43422	0.401554	8.55233	-20.8367	10.5	4.52658	0.257538	17.5763	-21.3645	10.5	4.5279	0.453391	9.98674	-20.9668	2.5	4.95137	0.52896	9.36058	-20.953
9	3.95555	0.481213	8.21996	-21	276	3.27317	0.364628	8.97673	-20.5332	9	2.60793	0.28921	9.01742	-20.949	387	3.28609	0.206938	15.8796	-21.3557	398	1.75312	0.132681	13.213	-21.3863	30.5	1.63911	0.302545	5.41774	-18.8636	15.5	2.74923	0.322064	8.53627	-20.9493	15.5	0.745651	0.0280956	26.5398	-20.9182	15.5	2.59158	0.252584	10.2603	-21.2288	3.5	3.43039	0.343967	9.97304	-21.1297
11	2.95402	0.363934	8.11691	-21.1	376	3.62751	0.366846	9.88838	-21.6329	13	2.62265	0.299447	8.75831	-21.6078	487	0.478674	0	ND	-22.7824	498	2.60353	0.193918	13.4259	-21.3097						20.5	2.58075	0.27877	9.25763	-21.3678	20.5	3.57366	0.202598	17.6391	-20.9022	20.5	1.46061	0.109146	13.3821	-21.4913	4.5	3.08224	0.268213	11.4918	-21.3304
15	2.42139	0.295786	8.1863	-20.7	476	2.84739	0.2816	10.1115	-20.62	17	2.78755	0.31329	8.89767	-22.0673																25.5	2.40975	0.247926	9.71963	-21.3449	25.5	3.26331	0.198325	16.4544	-19.7063	25.5	1.62831	0.111785	14.5664	-21.4331	5.5	3.03001	0.224779	13.48	-21.4519
22	4.63217	0.555568	8.33773	-20.6						22	2.7679	0.324247	8.5364	-21.8528																30.5	2.28779	0.222755	10.2704	-21.8556	30.5	3.1626	0.214115	14.7706	-19.4973	30.5	0.790387	0.0872103	9.06299	-21.7711	7.5	2.14002	0.136704	15.6544	-21.6915
26	3.54305	0.410879	8.62311	-20.8						26	2.8399	0.336227	8.44636	-21.3558																35.5	2.20346	0.215182	10.24	-21.6503						40.5	1.12451	0.0945953	11.8876	-21.6761	8.5	3.14157	0.206932	15.1817	-21.5531
30	2.94538	0.325242	9.05596	-20.8						30	3.40132	0.398123	8.54339	-21.0815																										45.5	0.757588	0.0767127	9.87565	-21.7042	9.5	1.76767	0.116648	15.1539	-21.6869
34	2.6298	0.278272	9.45045	-20.8
38	2.56985	0.269298	9.54278	-20.7
	bd: below detection
	ND: not determined

## Sheet: qPCR
NON-SEEP AREA (NSA)																				SEEP AREA (SA)
Sampled in 2015 using gravity cores and multi-cores																				Sampled in 2009 by Alvin using push cores																Sampled in 1998 by Alvin using push cores
MUC02 (St. 15) (Ctrl)				GC13 (St. 9) (Ctrl)				MUC12 (St. 40) (Ctrl)				GC09 (St. 51)				GC10 (St. 58)				Cold site (Ctrl)				Yellow Mat				Orange mat				Cathedral Hill				Everest Mound
																				4567 CS LC3				4563 YM LC1				4564 OM LC15				4565 LC10
depth (cm)	Bacteria (copies g-1)	Archaea (copies g-1)	BAR	depth (cm)	Bacteria (copies g-1)	Archaea (copies g-1)	BAR	depth (cm)	Bacteria (copies g-1)	Archaea (copies g-1)	BAR	depth (cm)	Bacteria (copies g-1)	Archaea (copies g-1)	BAR	depth (cm)	Bacteria (copies g-1)	Archaea (copies g-1)	BAR	depth (cm)	Bacteria (copies cm-3)	Archaea (copies cm-3)	BAR	depth (cm)	Bacteria (copies g-1)	Archaea (copies g-1)	BAR	depth (cm)	Bacteria (copies g-1)	Archaea (copies g-1)	BAR	depth (cm)	Bacteria (copies g-1)	Archaea (copies g-1)	BAR	depth (cm)	Bacteria (copies g-1)	Archaea (copies g-1)	BAR
0.5	6.16392e+08	3.64911e+07	16.8916	476	1.91694e+08	2.74744e+07	6.97716	0.5	1.13896e+09	2.38696e+07	47.7162	37	4.01319e+08	1.43138e+08	2.80373	48	1.33277e+08	6.93759e+07	1.92108	0	3.51617e+08	3.5784e+07	9.82609	0	3.47891e+08	1.18301e+08	2.94073	1.5	1380859822	1.56572e+09	0.881933	1.5	2.98667e+08	3.81007e+07	7.83889	0.5	1.61127e+08	1.93437e+07	8.32965
1.5	5.26158e+08	2.31666e+07	22.712	376	2.02646e+08	2.77938e+07	7.29106	1.5	9.65543e+08	3.30242e+07	29.2375	87	1.82417e+08	5.40927e+07	3.3723	98	3.35519e+07	4.36064e+07	0.769427	5.5	3.16898e+08	8.48004e+07	3.73699	5.5	3.18818e+08	1.86148e+08	1.71271	5.5	2.51925e+08	1.12574e+09	0.223787	5.5	6.6239e+07	2.74626e+07	2.41197	1.5	7.58984e+07	5.40281e+07	1.4048
2.5	1.73258e+09	1.09288e+08	15.8534	276	2.2945e+08	5.1981e+07	4.41412	2.5	5.53161e+07	1.39723e+06	39.5899	137	1.24759e+08	4.1051e+07	3.03912	148	1.83047e+07	3.47208e+07	0.527197	10.5	2.4104e+08	7.38827e+07	3.26247	10.5	8.27991e+07	7.56833e+07	1.09402	10.5	1.0902e+08	7.01135e+08	0.155491	10.5	1.65066e+07	2.49777e+07	0.660852	2.5	1.05199e+07	2.01495e+07	0.522092
3.5	1.37488e+09	1.2009e+08	11.4487	176	2.41098e+08	1.10909e+08	2.17384	3.5	2.28686e+07	1.89631e+06	12.0595	187	3.08247e+07	4.55152e+07	0.677239	198	4.68662e+07	1.10996e+08	0.422233	15.5	1.42168e+08	3.97988e+07	3.57216	15.5	3.26135e+07	2.7843e+07	1.17133	15.5	1.35331e+07	1.05231e+08	0.128604	15.5	3.14537e+07	1.70905e+08	0.184042	3.5	1.01008e+06	1.16357e+07	0.0868086
5	1.38569e+09	6.01e+07	23.0563	76	1.43089e+08	6.65182e+07	2.15112	5	3.441e+07	2.04221e+06	16.8494	237	3.92791e+07	1.00895e+08	0.389307	248	9.17848e+06	2.67358e+07	0.343303	20.5	229631519	7.45657e+07	3.07959	20.5	1.35272e+07	1.89008e+07	0.715694	20.5	5.33215e+06	9.93501e+07	0.0536703	20.5	2.50344e+06	5.41287e+07	0.0462497	4.5	961692	2.36374e+06	0.406851
7	9.31524e+08	8.17244e+07	11.3984	426	1.8312e+08	3.80368e+07	4.81427	7	1.62831e+08	1.22722e+07	13.2683	287	1.50985e+07	4.81962e+07	0.313272	298	431381	825048	0.522855	25.5	1.73357e+08	6.3738e+07	2.71983	25.5	917657	1.40212e+06	0.654476	25.5	395287	8.57629e+06	0.0460907	25.5	12226	808449	0.0151228	5.5	237216	85806.6	2.76455
9	2.39151e+09	1.10123e+08	21.7167	326	2.00473e+08	5.48946e+07	3.65196	9	9.3347e+07	7.53368e+06	12.3906	337	755377	2.01548e+06	0.374787	348	728782	4.72867e+06	0.15412	30.5	8.54711e+07	3.55358e+07	2.40521	30.5	676765	1.06858e+06	0.633331	30.5	282229	2.55364e+06	0.11052	30.5	5207.39	11201.9	0.464866	6.5	74701.4	23129.1	3.22976
11	2.07671e+09	1.59405e+08	13.0279	226	2.58431e+08	5.35328e+07	4.82752	11	2.1768e+08	4.4283e+07	4.91564	387	268308	6719.62	39.9291	398	609276	5.06996e+06	0.120174	35.5	1.46226e+08	5.79287e+07	2.52425	35.5	1.38235e+06	3.03008e+06	0.456208					35.5	3792.66	1950.59	1.94436	7.5	43302	11546.5	3.75023
13	1.73171e+09	1.3359e+08	12.9628	126	3.00292e+08	7.56876e+07	3.96752	13	3.80917e+07	1.07458e+07	3.5448	437	332904	20659.4	16.1139	448	403543	717601	0.56235	40.5	1.23081e+08	5.60929e+07	2.19423									40.5	20367.5	2070.14	9.8387	8.5	6479.46	bd	bd
15	9.72443e+08	1.18967e+08	8.17406	26	3.3757e+08	1.07774e+08	3.13219	15	3.24729e+07	8.55287e+06	3.79673	487	bd	1000	ND	498	243703	24271.9	10.0405													45.5	26390.9	514.199	51.3242	9.5	16765.8	3022.21	5.54752
30	6.97932e+08	2.1561e+08	3.23701					17	1.90977e+07	6.5399e+06	2.92018																									10.5	bd	bd	bd
34	6.33142e+08	2.05791e+08	3.07663					19	2.41066e+07	7.33076e+06	3.28842																									11.5	11671.2	bd	bd
38	4.34104e+08	1.57984e+08	2.74777					22	2.98068e+07	8.00678e+06	3.72269
								26	2.21981e+07	6.04342e+06	3.67311
								30	3.79681e+07	1.12802e+07	3.3659
				red: samples not included in manuscript, because sample to blank copy number ratios <3.
				bd: below detection
