# Supplementary material for: Interactions between temperature and energy supply drive microbial communities in hydrothermal sediment
Source: Commun Biol. 2021 Aug 25;4:1006. doi: 10.1038/s42003-021-02507-1 (PMC8387401; doi:10.1038/s42003-021-02507-1)
Supplement: Supplementary file 5 — Supplementary Data 2 [file 42003_2021_2507_MOESM5_ESM.xlsx]

## Sheet: Bacteria
Station name	NSA - MUC02					NSA - GC13					NSA - MUC12						NSA - GC09				NSA - GC10						SA - Cold Site					SA - Yellow Mat					SA - Cathedral Hill				SA - Orange Mat						SA - Everest Mound
Sample ID	St15-0-1	St15-4-6	St15-14-16	St15-28-32	St15-36-40	St9-26	St9-76	St9-176	St9-326	St9-476	St40-0-1	St40-3-4	St40-6-8	St40-10-12	St40-16-18	St40-28-32	St51-37	St51-137	St51-237	St51-337	St58-48	St58-148	St58-248	St58-348	St58-398	St58-448	CS-01	CS-05	CS-15	CS-25	CS-40	YM-01	YM-05	YM-15	YM-25	YM-35	CH-01	CH-05	CH-15	CH-20	OM-01	OM-05	OM-15	OM-20	OM-25	OM-30	EM-01	EM-03	EM-05
Depth (cm)	0.5	5	15	30	38	26	76	176	326	476	0.5	3.5	7	11	17	30	37	137	237	337	48	148	248	348	398	448	0.5	4.5	14.5	24.5	39.5	0.5	4.5	14.5	24.5	34.5	0.5	4.5	14.5	19.5	0.5	4.5	14.5	19.5	24.5	29.5	0.5	2.5	4.5
Acetothermia	1.91e-05	0.000201878	0.0010106	0.00118987	0.00205943	0.00580087	0.00394529	0.00889721	0.00936786	0.0113112	5.94e-05	0.00010758	0.000338224	0.000967304	0.00120582	0.00208202	0.00558287	0.000766123	0	0.0229011	0.0027894	0	0.00041806	0	0	0	4.78e-05	0.000529155	0.00351713	0.00291704	0.00327169	0.000101595	0.000927743	0.00747286	0.00514168	0.021448	0.000412851	0.00778254	0.136625	0.185962	0.0229066	0.0746147	0.0831688	0.0377821	0.0499504	0.0173039	0.00291937	0.0471045	0.0173667
Acidobacteria
Holophagae	0.0121307	0.0271783	0.0173188	0.0161186	0.0144375	0.000828692	8.87e-05	6.14e-05	0	0	0.0118989	0.0438028	0.0256065	0.0688512	0.0414082	0.0171903	0	0	0	0	0	0	0	0	0	0	0.0127988	0.0227298	0.0448706	0.0161042	0.00502186	0.00919404	0.0199451	0.00186805	0	0	0.00789786	0.00485348	8.02e-05	0.00146709	0.00163502	0.00018	0	0	0	0.00798645	0.00211571	0.000950478	0.00193139
Other Acidobacteria	0.0268786	0.0115246	0.00901429	0.0214357	0.0180104	0.000943669	0.00128562	0.0003069	0.0001873	0.000837759	0.0164329	0.0170602	0.0123194	0.0199022	0.0141904	0.0107047	0.00198197	0.000818304	0.00457485	0	0.00343174	0.00415456	0.0111996	0.0022289	0	0	0.0249118	0.0190945	0.0144397	0.00826821	0.00441282	0.0020486	0.00895053	0.00167056	0	0	0.00142493	0.00320058	0.000775215	0.00630848	0.000505743	8.2e-05	0	0	0	0	0.00137765	0.000517087	0
Aerophobetes	7.64e-05	7.64e-05	7.64e-05	7.64e-05	7.64e-05	0.027554	0.025511	0.0516241	0.0352605	0.0342194	1.98e-05	1.98e-05	1.98e-05	1.98e-05	1.98e-05	1.98e-05	0.0339663	0.0501114	0.0284258	0.00804233	0.0248294	0.0224223	0.0379995	0.0182197	0.0272613	0.0782149	6.37e-05	0.00101667	0.00111413	0.00514377	0.00791302	1.69e-05	0.000257688	0.00628602	0.274142	0.30621	1.33e-05	0.00809638	0.191879	0.19835	0.00123047	0.00027824	0.000201156	0	0	0	0.00203372	0.0069888	0
Aminicenantes	0.00298004	0.00883349	0.0314739	0.038353	0.0741704	0.152502	0.120418	0.103534	0.0660807	0.0718855	0.00130672	0.00301224	0.0102107	0.0587549	0.0551249	0.0552739	0.10677	0.10926	0.125188	0.0742938	0.139507	0.0567516	0.0769011	0.0364394	0	0.0791037	0.00725187	0.0200557	0.0369624	0.0719601	0.095813	0.00125285	0.0116647	0.044134	0.00343723	0.00876924	0.0031165	0.0837256	0.0128044	0.00748215	0.00783781	0.000834554	7.31e-05	3.36e-05	0	0	0.000574017	0.000517172	0
Atribacteria	0.000783243	0.00176666	0.0280455	0.0431354	0.138247	0.130496	0.175739	0.24235	0.302975	0.210306	0.000178188	0.00101124	0.00775847	0.17433	0.0318475	0.0575587	0.0643014	0.0348934	0.00035738	0	0.0610732	0.00433339	0.000946136	0.00419197	0	0	0.000701213	0.0162535	0.0470115	0.167377	0.167488	0.00201494	0.24336	0.57308	0.492493	0.34178	0.0356543	0.234524	0.00427705	0.00125518	0.0231762	0.00461433	0.000219408	0.00104112	0	4.03e-05	0.260136	0.106817	0.196511
Bacteroidetes
Bacteroidia	0.00149007	0.00535045	0.00274298	0.0021696	0.00148547	2.3e-05	0	0	0	0	0.00162349	0.00380833	0.00139522	0.00065156	0.000322997	5.53e-05	0	0	0	0	0	0	0	0	0	0	0.00216764	0.00476317	0.00382295	0.00279627	0.000190175	0.00347114	0.00269719	0.00178032	0	0	0.00330311	0.0121341	0.000294021	0	0.00202264	0.000785492	0.000128008	0	0	0	0.014318	0.00760381	0.0036728
Sphingobacteriia	0.00748847	0.00530022	0.00478198	0.0022629	0.00101278	9.21e-05	4.43e-05	0	0	0	0.0107902	0.00159219	0.00253665	0.000671202	0.000710595	1.84e-05	0	0	0	0	0	0	0	0	0	0	0.00706072	0.00321735	0.002403	0.00122553	0.0002471	0.0183038	0.00391714	0.000395585	0	0	0.011747	0.0267996	0.000374289	0	0.00239376	0.00055648	5.49e-05	0	0	0	0.0318999	0.0104832	0.0303323
NA	0.00303743	0.00195176	0.00175045	0.00195966	0.00118165	0.000437408	0.000399033	0.000245439	0	0	0.00219765	0.000968204	0.000676484	0.000473658	0.00187338	0.000221148	0.000181527	0.000261178	0	0	1.84e-05	0.00125231	0	2.04e-05	0	0	0.00159389	0.00119786	0.00179121	0.00124272	0.000684613	0.000575548	0.000326575	0.00806631	0.00186066	0.0131355	0.00820444	0.00661093	0.0001337	0	0.00323633	0.00561265	0.000329082	0	0	0	0.0330808	0.0557567	0.00907119
Other	0.0808274	0.0803748	0.0699144	0.0446051	0.0247124	0.00538608	0.00611739	0.00265906	0.00466519	0.00186612	0.110733	0.052628	0.0591714	0.0251722	0.0326657	0.0192354	0.00128595	0.000383038	0.0011913	0	0.00190862	0	0.00110016	0	0	0	0.0908987	0.057674	0.0410473	0.0215242	0.0142093	0.14975	0.0598185	0.0145723	0.00227257	0.00102307	0.0871316	0.0297282	0.000694841	0.00317869	0.00886665	0.0145797	0.000859496	0.00184714	0.0199802	0.0268635	0.0413303	0.0352378	0.0336727
Caldiserica	0	0	0	0	0	0	0	0	0	0	0	0	0	0	0	0	0	0	0	0	0	0	0	0	0	0	0	0	0	0	0	5.08e-05	0.00814293	0.0430568	0.0553512	0.0917661	0.00310322	0.0371137	0.00751156	0.00475989	0.00869746	0.00196354	0.000109721	0.000335841	0	0	0.0033622	0.011839	0.00641158
Chloroflexi
Anaerolineae	0.00525333	0.0147726	0.0165847	0.0327772	0.0404108	0.096128	0.0643647	0.0330734	0.0293961	0.0145865	0.00405878	0.0190632	0.0298922	0.0630984	0.063738	0.0642836	0.0119826	6.96e-05	0.000667159	0	0.00211054	0	0	0	0	0	0.0185685	0.0399442	0.0328552	0.0392682	0.0343343	0.00992229	0.0557982	0.0531453	0.0244443	0.000949905	0.0295673	0.0367788	0.000427684	0.0001793	0.0229743	0.00374728	0.000347503	0	0	0	0.0101194	0.0047943	0.00820052
Dehalococcoidia	0.007641	0.0300505	0.0917462	0.163023	0.164076	0.342156	0.369611	0.322754	0.39609	0.50674	0.00259368	0.0221613	0.0245847	0.162107	0.141839	0.167516	0.522384	0.582688	0.621816	0.684925	0.535678	0.629376	0.658995	0.773163	0.616145	0.675072	0.0156989	0.0894152	0.15285	0.18488	0.306745	0.000439928	0.0208052	0.0406398	0.0363326	0.0494	0.00270338	0.0623229	0.0617231	0.0551788	0.00989481	0.00140748	0.000457264	0.0001008	0	0	0.00034441	0.000195776	1.58e-05
MSB-5B2	1.91e-05	6.73e-05	0.0001984	0.0001633	0.000911476	0.00239396	0.00155149	0.0019226	0.000936786	0.0001714	0	0	0.000486266	0.00406705	0.00101206	0.00128973	0.0259626	0.0928576	0.0253282	0.0269959	0.0191955	0.00787167	0.0253697	0.0264401	0.084765	0	1.59e-05	0.000208958	0.000283946	0.00136358	0.00167396	1.69e-05	0.000257688	0.000395664	0	1.83e-05	0	0.0001046	0	0	0	0	0	0	0	0	1.64e-05	0	0
Other	0.015684	0.00915309	0.0152127	0.0189432	0.0221128	0.0173104	0.0108384	0.00848828	0.00494614	0.010416	0.00586042	0.0098543	0.0094705	0.0277978	0.037037	0.0543712	0.036054	0.0210509	0.0210632	0.0170655	0.026298	0.0101177	0.00963738	0.0199987	0	0.00224543	0.0302039	0.0258217	0.0202286	0.0201089	0.0151787	0.00367441	0.0118197	0.0202647	0.00774093	0.00286826	0.00311635	0.0110043	0.0186854	0.0150947	0.0287219	0.0143177	0.000365669	0.00308974	0.00807416	0.0287189	0.00331298	0.00223652	0.00128232
Elusimicrobia	0.0001528	0.00055516	0.00135338	0.00370935	0.00324094	0.00458088	0.00452169	0.00505229	0.00395303	0.00477952	0.0002178	0.00301223	0.000317122	0.00292181	0.00333764	0.0033533	0.00251157	0.00407428	0.00262101	0.0233915	0.0147362	0.107838	0.0356011	0.00421237	0	0	0.000717181	0.0010168	0.00397579	0.00319335	0.00384219	1.69e-05	0.000274854	0.00164839	0.00025566	0.000529806	2.66e-05	0.00043934	0	0	0	0	0	0	0	0	0	0	0
Firmicutes
Clostridiales	0.000477552	0.00158163	0.00164224	0.00450252	0.00307235	0.0001381	0.000576362	2.05e-05	5.61e-05	1.9e-05	0.000475181	0.0037653	0.0018393	0.00327714	0.00101206	0.000847615	1.51e-05	0	0	0	5.51e-05	0	0	2.04e-05	0	0	0.000940263	0.0031755	0.00709976	0.00402183	0.000684563	0.0144943	0.00563481	0.00485749	0.000752769	0.00166249	0.0118668	0.00535579	0.000213789	0	0.0110069	0.00628347	0.0027247	0.000671682	0.00513189	0	0.0556649	0.0477336	0.0490288
NA	0	0	0	0	0	0	0	0	0	0	0	0	0	0	0	0	0	0	0	0	0	0	0	0	0	0	0	0	0	0	0	0	0	0	0	0	0	0	2.67e-05	0	0.00074164	0.000245443	0	0	0	0	0.000639636	0.0179752	0.00679152
Other Firmicutes	0.00057311	0.000235554	0.000270578	0.00156303	0.00128289	0.00149617	0.00141849	0.00137048	0.000955465	0.00110443	0.000237586	0	0.000465026	0.00203341	0.00133506	0.00195302	0.00157338	0.000679052	0.0001906	0.00041683	0.00267929	0.00272327	0.00134218	0.00102243	0.0278889	0	1.59e-05	0.000236776	0.000720874	0.000759626	0.000932075	0	5.16e-05	0.000263874	0.00116469	0.00913459	0	4.18e-05	8.02e-05	0	5.06e-05	0.00240534	0.000182869	0	0	0	0.00250934	0.0204912	0.0186331
Omnitrophica	0.00112697	0.00311269	0.00465535	0.00979826	0.014416	0.0197275	0.0183522	0.0286963	0.0201219	0.0201087	0.000593986	0.0023452	0.00143719	0.00519138	0.0132643	0.0166557	0.0212267	0.0301049	0.0559222	0.0251569	0.028482	0.0404517	0.0731605	0.00646167	0	0	0.00202374	0.00419231	0.00983	0.0123758	0.0164151	0.00111745	0.00183856	0.00118697	0.00105106	0.000529891	0.00390232	0.00257298	0.00451754	0.00083135	0.0150183	0.0287171	0.0328798	0.0145419	0.0478976	0.0308567	0	0	0
Parcubacteria	0.00599837	0.00721799	0.00476359	0.00671841	0.0087443	0.00925362	0.0130327	0.0164857	0.0129834	0.00950212	0.00199967	0.00376527	0.00304415	0.00471804	0.0111541	0.00681703	0.0040094	0.0040918	0.010484	0.0163299	0.0027532	0.0055261	0.0125638	0.0114103	0.136032	0.0504748	0.00710861	0.00724208	0.00945853	0.00773318	0.00667627	0.00919415	0.034565	0.0311223	0.0089482	0.0263076	0.0068724	0.00995805	0.00449078	0.00254295	0.00325317	0.00288009	0.00305389	0.00295542	0.0128981	0	0.0110214	0.0040535	0.00834296
Planctomycetes	0.0480638	0.0538752	0.0506544	0.063175	0.0571227	0.0361855	0.032959	0.0268973	0.0444404	0.0246594	0.0363504	0.0511217	0.0397221	0.0399774	0.0645349	0.0673046	0.0243434	0.0124144	0.00600444	0.0224353	0.0201507	0.0129008	0.00305844	0.0102652	0.00353024	0.00430369	0.0509876	0.0488585	0.0544808	0.0478474	0.0425696	0.0104468	0.014535	0.0127711	0.00646259	0.0196394	0.00829641	0.0219446	0.00515923	0.0133994	0.0279472	0.0170183	0.00213958	0.00366067	0.00352389	0.00976121	0.00631427	0.00258584	0.00919784
Proteobacteria
Alphaproteobacteria	0.069881	0.0214023	0.0198508	0.00543589	0.00695476	0.00679064	0.00270412	0.00239326	0.00133014	0.00112333	0.0520503	0.00585226	0.0147979	0.00694919	0.0129199	0.0103546	0.000650592	0.0001392	0	2.45e-05	0.000532321	0	0	0	0	0	0.0320686	0.0152088	0.0160342	0.00925194	0.00663849	0.00370803	0.0109951	0.00210994	0.000568141	0.000584613	0.00301	0.00343079	2.67e-05	0.000391224	0.000253	0.0001147	0.000219443	0.00117544	0.00266858	0.012383	0.00644552	0.00560507	0.00846961
Gammaproteobacteria
BD7-8_marine_group	0.0767585	0.0386647	0.0344703	0.000723201	0.000641437	9.21e-05	0	0	3.75e-05	0	0.0406066	0.00286163	0.00649008	0.000454088	0.00118432	0.00143713	0	0	0	0	0	0	0	0	0	0	0.041409	0.017688	0.000742748	0.000673168	0.00034235	0.00467338	0.00290324	2.2e-05	0	0	0.00114538	0.0014227	0	0	0.000219099	0.000131	0	3.36e-05	0	0	0.00024601	2.8e-05	0
Methylococcales	0.000802328	1.68e-05	0.0002705	2.33e-05	6.76e-05	0	0	0	0	0	0.00318756	0.000989736	0.00211399	0	0.000236865	9.21e-05	0	0	0	0	0	0	0	0	0	0	0.00153012	0.000334403	0.0001747	0	0	0.0577567	0.00795394	0	0	0	0.0103754	0.0023013	0.0001604	0	0.00050572	0.000311103	0	0	0	0	0.00651118	0.00433306	0.00270711
Thiotrichales	0.00278906	0.00233874	0.00387998	0.00482904	6.76e-05	0.000460365	0.000620602	0	0	0	0.0804213	0.0132323	0.0282434	0.000236858	0.00527562	0.00274525	0	0	0	0	0	0	0	0	0	0	0.00143439	0.0034539	0.00021841	0.000207107	0.000228175	0.0424835	0.0109605	0.000615443	0	0	0.0109747	0.00623443	5.35e-05	0.00151599	0.0021576	0.025379	0.000914344	0	0	0	0.00893852	0.00849839	0.00682318
NA	0.0671109	0.0680084	0.057931	0.0322873	0.00665091	0.00108189	0.00733635	0.000245486	3.75e-05	3.8e-05	0.105961	0.136777	0.094666	0.0110755	0.0114556	0.00687236	4.54e-05	0	2.38e-05	2.45e-05	0	0	0	0	0	4.68e-05	0.0680426	0.0488161	0.0209274	0.0071461	0.00536411	0.0579598	0.045147	0.00283535	0.000127832	0.000840382	0.0276628	0.0104603	0.000294026	0.000407525	0.00160151	0.000801929	0.000347451	0.000638098	0.0140614	0	0.00959451	0.00803712	0.00435354
Xanthomonadales	0.145627	0.0947437	0.0797689	0.00627544	0.00395004	0.000759594	0.0002661	4.1e-05	0	0	0.115781	0.0307249	0.0525125	0.0035733	0.00350991	0.00252418	0	0	0	0	0	0	0	0	0.0581706	0	0.156663	0.0687604	0.00356063	0.0020542	0.00213009	0.00680687	0.0443569	0.000439511	0	0.000109615	0.00506107	0.00387028	2.67e-05	0	0.0002192	0.000523817	0	0	3.42e-05	0.0136334	0.00244372	0.00181712	0.00561999
Other	0.0487333	0.0227816	0.0255001	0.0126209	0.00226243	0.000529215	0.000598526	0.000327273	0.000505736	7.61e-05	0.0674336	0.073886	0.0629979	0.0069887	0.00282084	0.00204512	0.000151268	0	0	0	0	0	0	0	0	0	0.0218043	0.0108776	0.00340772	0.00138109	0.0011981	0.0274476	0.0135374	0.00217614	0	0	0.0145305	0.00541829	2.67e-05	0	0.00514152	0.0347061	0.00513861	0.00285465	0.0040713	4.03e-05	0.00608472	0.00799521	0.00338785
Deltaproteobacteria
Bdellovibrionales	0.00254076	0.00486261	0.00063144	0.00034992	0.000303838	0.000138115	6.65e-05	2.05e-05	0	3.81e-05	0.00100975	0.0024098	0.000761067	0.000296145	0.000495263	0.00103178	3.02e-05	0	0.000643332	0	9.18e-05	0.000298169	0.00393857	0.0293438	0	0	0.000255	0.000668482	0.0001309	0.000466097	0.000513572	0.0001524	0.0001719	0	0	0	0.000639282	0.0114856	0.17306	0.0348841	0.221245	0.100779	0.0278509	0.0348603	0.0559376	0.04808	0.0001312	0	0.00156727
Desulfarculales	0.0050623	0.0138138	0.0219448	0.0385162	0.0504376	0.0472581	0.0475421	0.0518699	0.0239629	0.0226414	0.00285102	0.0260774	0.0175675	0.03684	0.0360034	0.0348595	0.0398062	0.013024	0.00495601	0.0110583	0.0312709	0.0089252	0.00567681	0.00110423	3.92e-05	0	0.00867046	0.0232311	0.0436691	0.0463451	0.0561906	0.0092111	0.0178838	0.00226403	0.00143456	0.00272214	0.00693885	0.0187451	0.000534615	0.000260815	0.042594	0.0127468	0.00268816	0.000973971	0.00619248	0.00391252	0.00159089	0.0001818	0.000443269
Desulfobacterales	0.0385699	0.123145	0.115105	0.160247	0.121975	0.0210853	0.0153156	0.0371436	0.00402807	0.00218976	0.0472788	0.160617	0.110352	0.100155	0.0864125	0.0719666	0.00609728	0.00719114	0.0141056	0.0425412	0.00423939	0.0311091	0.00763509	0.00817946	7.84e-05	0.0104318	0.0461263	0.131003	0.148134	0.1138	0.0467743	0.224711	0.114998	0.0161991	0.0028265	0.00447591	0.200527	0.0797084	0.00229898	0.00360252	0.259305	0.0461765	0.00325512	0.0027539	0.0158746	0.00161339	0.22079	0.22325	0.0776355
Desulfurellales	0.00150916	0.000723513	0.000739867	0.000279949	0.000405098	2.3e-05	4.43e-05	2.05e-05	3.75e-05	0	0.00182147	0.000494868	0.000359364	0.000276329	0.000366064	0.000700138	0	0	0	0	7.34e-05	0	0	0	0	0	0.001307	0.000738131	0.001267	0.000569643	0.000342372	0.0001016	0.000257708	2.2e-05	1.42e-05	0	9.32e-05	0.000523061	0.151808	0.00405894	0.000303465	0.00222535	0.00120694	0.000537377	0.00177906	0	1.64e-05	0	0
NB1-j	0.0526114	0.0546492	0.039072	0.015817	0.0104659	0.00108181	0.0005322	8.19e-05	5.62e-05	0	0.0405275	0.0294124	0.0293215	0.00848928	0.0141258	0.0128604	6.05e-05	1.74e-05	2.38e-05	0	0	0	0	0	0	0	0.0455531	0.0186212	0.0100703	0.00743936	0.00467942	0.0013881	0.00493066	0.000352	0	0	0.00122498	0.00112951	0	1.63e-05	0.000151833	0.0001312	0	0	0	0	0.000557622	0.000363475	0
Other	0.0608638	0.0857591	0.0699675	0.0768927	0.0544885	0.0103125	0.0117473	0.00484783	0.00284739	0.00108543	0.0605835	0.0876132	0.140287	0.0555556	0.0810507	0.0760754	0.0159164	0.00153214	0.00412209	0	0.015709	0.00699706	0.00288242	0	0	0	0.0499364	0.0613794	0.0578897	0.051023	0.0372445	0.0288866	0.0535137	0.0229905	0.0108515	0.00515191	0.0184194	0.0126567	0.014729	0.00272226	0.0261938	0.0107998	0.00164583	0.00225013	0	0.0103259	0.00610112	0.00512975	0.0195197
Epsilonproteobacteria
Sulfurimonas	0.000191	0.000454283	0.00164223	0.0014697	0	0	0	0	0	1.9e-05	0.00514761	0.00380833	0.0132761	0.0001579	0.00090436	0.000147398	3.03e-05	0	0	0	0	0	0	0	0	0	0.00164166	0.00199159	2.18e-05	0	5.71e-05	0.0805649	0.0119912	0.000175795	0	0.000548075	0.09459	0.0440386	0.00176435	0.00456427	0.0295814	0.135403	0.0115024	0.00560856	0.0224093	0	0.0411828	0.0456229	0.0366806
Sulfurovum	0.000439373	0.000420633	0.00126331	0.00627552	0.000708956	0.0017955	8.86e-05	0	1.87e-05	0	0.000376177	0.000129096	0.000359385	0.000710746	0.00256248	0.00683556	1.51e-05	0	0	2.45e-05	0	0	0	0	0	0	0.00041437	0.000640641	0.000283992	0.00046604	0.000836976	0.128399	0.0245319	0.00153849	0	0.000548106	0.263259	0.0448127	0.00232562	0.0033417	0.0129113	0.00472893	7.32e-05	0	0	0	0.151807	0.140531	0.136147
Other	0.000764128	0.000168252	0.00077596	0	3.38e-05	0	0	0	0	0	0.0012869	0.00114035	0.000465106	0	0	0	0	0	0	0	0	0	0	0	0	0	0.000525937	0.0001252	0	0	0	0.00289543	0.000446784	2.2e-05	0	0	0.00471488	0.00439331	0.000320815	0.0016627	0.00453417	0.011814	0.000786336	0.000268673	0	0	0.0003608	0.000265521	0
Thermodesulfobacteria	0	0	0	0	0	0	0	0	0	1.9e-05	0	0	0	0	2.15e-05	0	0	0	4.77e-05	0	3.68e-05	0	2.2e-05	0	0	4.68e-05	0	5.57e-05	6.55e-05	0	0	0	3.44e-05	2.2e-05	1.42e-05	0	0	0	0.000133658	0.046197	0.0135518	0.246196	0.697937	0.750705	0.410243	0.534285	0.000278817	0.0177655	0.191777
Thermotogae	0	1.68e-05	0	0	0	0	0	2.05e-05	0	0	0	0	2.11e-05	0	0	0	0	0	0	0	0	0	0	0	0	0	0	0	0	0	0	0	3.44e-05	0.000417643	0.00072437	9.13e-05	0	0.00391217	0.0229357	0.0584879	0.00448353	0.0143011	0.0026517	0.00181356	0.0120086	0.00258144	0.00582234	0.038103	0.0439786
Verrucomicrobia	0.00387791	0.00420637	0.00443888	0.0023328	0.00104674	9.2e-05	2.22e-05	2.05e-05	0	1.9e-05	0.00550404	0.00815458	0.00276914	0.00120423	0.00243325	0.00119743	0	1.74e-05	0	2.45e-05	0	0	0	0	0	0	0.00607227	0.00327332	0.00238088	0.000794196	0.0001901	0.00570585	0.00171839	0.000175874	0	0.000146153	0.00346264	0.00196639	0.0230693	0.111939	0.00261285	0.000523932	1.83e-05	0.000839602	0.00540559	0	0.00118085	0.00117406	0
Other Bacteria	0.166849	0.192746	0.159761	0.169573	0.152605	0.0584362	0.0602505	0.0465312	0.0338493	0.048842	0.133547	0.147296	0.177475	0.137094	0.223478	0.215254	0.0728647	0.0272989	0.035955	0.0128727	0.0619564	0.041224	0.0200448	0.0128824	0.0460893	0	0.202405	0.209128	0.206566	0.141658	0.111195	0.0702513	0.110187	0.067945	0.0325429	0.0743008	0.0874493	0.136343	0.155212	0.228295	0.16313	0.170188	0.117527	0.128275	0.299976	0.242941	0.0422005	0.0718525	0.0569442
[truncated: 5 more columns]

## Sheet: Archaea
Station name	NSA - MUC02					NSA - GC13					NSA - MUC12						NSA - GC09							NSA - GC10							SA - Cold Site					SA - Yellow Mat					SA - Cathedral Hill					SA - Orange Mat
Sample ID	St15-0-1	St15-4-6	St15-14-16	St15-28-32	St15-36-40	St9-26	St9-76	St9-176	St9-326	St9-476	St40-0-1	St40-3-4	St40-6-8	St40-10-12	St40-16-18	St40-28-32	St51-37	St51-137	St51-237	St51-337	St51-387	St51-437	St51-487	St58-48	St58-148	St58-248	St58-348	St58-398	St58-448	St58-498	CS-01	CS-05	CS-15	CS-25	CS-40	YM-01	YM-05	YM-15	YM-25	YM-35	CH-01	CH-05	CH-15	CH-20	CH-25	OM-01	OM-05	OM-15	OM-20
Depth (cm)	0.5	5	15	30	38	26	76	176	326	476	0.5	3.5	7	11	17	30	37	137	237	337	387	437	487	48	148	248	348	398	448	498	0.5	4.5	14.5	24.5	39.5	0.5	4.5	14.5	24.5	34.5	0.5	4.5	14.5	19.5	24.5	0.5	4.5	14.5	19.5
Aenigmarchaeota	0.00204607	0.0104339	0.0135091	0.0142217	0.0153937	0.011684	0.0292321	0.0123575	0.00894758	0.00382406	0.00140065	0.021055	0.00492147	0.00270122	0.0149055	0.0109266	0.00875025	0.00239169	0.00126495	0.00326372	0	0	0	0.0106845	0.000978397	0.0018314	0.001106	1.30789e-05	0	5.95554e-06	0.0031754	0.0157036	0.0101199	0.0101763	0.00980145	0.00179676	0.00993487	0.0100353	0.000682098	0	0.0305574	0.0143319	0.00269842	0.00337911	0	0.000803122	0.00215596	0.000827602	0.00130492
Aigarchaeota	0	0	0	0	0	1.47154e-05	0	0	0	0	0	0	0	0	0.000781614	0.000250678	0	1.1335e-05	0	0	0	0.00244307	1.91406e-05	0	0	0	7.3245e-06	0	0	0	0	0	0	0	0	0	7.60321e-05	0.0119838	0.0182387	0.0562149	6.05576e-05	0.000347112	0.0132168	0.0306108	0.0244448	0.00997007	0.0340108	0.0270313	0.0269185
Bathyarchaeota
C3	0.0340618	0.110298	0.170883	0.156376	0.185653	0.0966802	0.145178	0.0578297	0.0723539	0.103693	0.0486189	0.287027	0.321464	0.250206	0.214025	0.185163	0.0722366	0.217406	0.0241237	0.00302286	0.250942	2.30478e-05	0.0694803	0.145396	0.00679636	0.00845838	0.00198494	1.30789e-05	0.015706	4.76443e-05	0.0761213	0.157821	0.16081	0.104988	0.206111	0.0343608	0.200091	0.0895939	0.0448109	0.0625953	6.05576e-05	0.175292	0.0264886	0.00693892	6.0061e-05	0.00219844	0.000209943	2.23676e-05	1.24278e-05
MCG-1	0.000655792	0.00134032	0.00439541	0.00361441	0.00627378	0.0148773	0.0383659	0.0435907	0.0169713	0.134858	0.000332248	1.04001e-05	0.00319602	0.0109766	0	0.000575086	0.290403	0.215626	0.0233522	0.04344	1.93725e-05	1.15239e-05	0	0.216878	0.676753	0.0136931	0.0011353	0.0200892	0.065706	0.0793873	0.00101436	0.0033165	0.00126498	0.00573312	0.0134612	0.000259326	0.00684289	0.0051901	0	0	0	0.0265425	0.296235	0.0928081	0	0.0556831	0.00609643	0.000447352	0.00011185
MCG-2	0.000131158	0.000103101	0.00129171	0.000285675	0.0055903	0.0255901	0.01372	0.0221098	0.0204057	0.144778	0.000260586	0	0.000333327	0.00699341	1.37125e-05	0.000648814	0.160189	0.0882773	0.00380382	1.20433e-05	1.93725e-05	1.15239e-05	0	0.114307	0.0771448	0.00582356	0	1.30789e-05	0	0	0.000176411	0.000117191	4.28807e-05	0.00257991	0.015228	1.85233e-05	0.000215424	0.00153462	0	0	0.000181673	0	0	0	0	0	8.07474e-06	0	0
MCG-3	4.37195e-06	0	1.79404e-05	0	1.02013e-05	0	0	9.98183e-06	0	0	0	0	0	0	0	0	0	2.26701e-05	0.0126405	0.106643	9.68626e-06	0.0126763	0	4.34329e-05	0	0.0277155	0.055051	0.116991	0.144951	0.166993	2.94018e-05	0	0	0	1.40221e-05	0	0	0	0	0	0	7.71361e-06	0	0	0	8.11234e-06	0	0	0
MCG-4	4.80914e-05	0	7.17618e-05	1.24207e-05	3.06038e-05	2.94308e-05	3.85394e-05	0	0	0.000203211	2.60586e-05	0	0	6.8675e-05	0	0.000221187	2.45563e-05	0.000827458	0.611679	0.191139	0	1.15239e-05	0	8.68659e-06	0.00334577	0.571507	0.217047	0.194235	0.0443029	0	0	5.85954e-05	7.14679e-06	0	0.000182287	0	2.5344e-05	5.17286e-05	0	0	0	7.71361e-06	0	5.42103e-05	0	8.11234e-06	1.61495e-05	0	0
MCG-8	0.00367681	0.0117535	0.0137962	0.021525	0.0238098	0.0178056	0.0331824	0.0143888	0.0107652	0.0288374	0.00216287	0.00690046	0.0153722	0.0399002	0.0154952	0.0124307	0.0100354	0.00625694	0.0381189	0.0596864	0	0.0215152	0	0.00746178	0.00628096	0.0568533	0.0699344	0.0617455	0.0489053	0.0208086	0.00427796	0.0197232	0.016945	0.0195643	0.0233959	0.00670544	0.0498517	0.0376929	0.0368877	0.0992596	0.00429959	0.00840783	1.37675e-05	1.80701e-05	4.50457e-05	8.11234e-06	0	0	0
MCG-9	0	0	0	0	3.06038e-05	0	0	0	0	0	0	0	0	0	0	0	0	0.00903403	0.0944943	0.000180649	0	0	0	0	0.00402715	0	0.000131841	0.00976994	0	0	0	0	0	0	0	0	0	0	0	0	0	0	0	0	0	8.11234e-06	0	0	1.24278e-05
MCG-16	0	0	0	1.24207e-05	5.10064e-05	4.41462e-05	0	0	0	0.000129316	6.51466e-06	0	0	0.000160242	0	0	0	0	0.0786152	0.343666	0.485117	0.119964	0.0981338	1.73732e-05	0.0112254	0.185071	0.426359	0.332937	0.384048	0.400939	0	0	1.42936e-05	0	2.10331e-05	1.85233e-05	0.000139392	0.00763859	0	1.86019e-05	8.47807e-05	1.54272e-05	0.0758312	0.065992	0	3.24494e-05	0	0	1.24278e-05
MCG-17	0.00698637	0.0236308	0.0392716	0.0598303	0.0621257	0.03542	0.0444359	0.0183766	0.021671	0.023203	0.00268404	0.0364159	0.0822729	0.111082	0.0474865	0.0817359	0.0139726	0.0033325	0.0219617	0.00880362	0	0.00455195	0	0.0123089	0.0417566	0.0202253	0.0255552	0.0620332	0.00904826	0	0.00876174	0.053064	0.0242562	0.0461516	0.0467076	0.00433446	0.0413361	0.0202604	0.00287173	0	0.00255553	0.0109842	0.0576857	0.0161728	3.00305e-05	5.67864e-05	8.07474e-06	0	0
MCG-21	0	0	0	0	0	0	0	0	0	0	0	0	0	0	0	0	0	0	0.000224282	0.00597346	0	0.0858648	0	8.68659e-06	0	0	0.000703152	0.000745498	0.00965147	0.00742655	0	0	0	0	0	0	0	0.000310372	0	0	0	0	0.0111379	0.0410914	0	0.00103027	0.00144538	0.000134206	2.48555e-05
MCG-22	1.31158e-05	0.000123722	0.00358809	0.00171405	0.00178522	0.00111837	0.00123326	2.49546e-05	0.00126531	0.000424895	0	0	0.000647046	0.00163675	0.00135754	0.00632594	0.00248838	0.00729977	0.00165071	0.00527495	0	0.170381	0.385836	0.00582001	0.000331956	0.00120264	0.00120122	0.00150407	0.00236819	0.0455718	8.82055e-05	0.00142973	0.000836174	0.00114662	0.00265719	0	0	0.0009656	0.00564461	0.0019718	0	0.000779075	0.00713155	0.0374955	0.0795808	0.00128175	0.00808281	0.00456299	0.0151246
MCG-23	0	8.2481e-05	0	0	0	1.47154e-05	0	0	0	0	0	0	0	0	0.00187862	0.00176949	1.63709e-05	1.1335e-05	0	0.000566033	0	0.0999124	0	0	0	0	0	0	0	1.19111e-05	0	1.17191e-05	0	0	0	0	0.000215424	0.050694	0.215582	0.041073	0.000375457	0.0024375	0.123178	0.245772	0.000210213	0.0296344	0.119006	0.00702343	0.00241099
MCG-27	4.37195e-06	0	1.79404e-05	0	1.02013e-05	0	0	9.98183e-06	0	0	0	0	0	0	0	0	0	2.26701e-05	0.0126405	0.106643	9.68626e-06	0.0126763	0	4.34329e-05	0	0.0277155	0.055051	0.116991	0.144951	0.166993	2.94018e-05	0	0	0	1.40221e-05	0	0	0	0	0	0	7.71361e-06	0	0	0	8.11234e-06	0	0	0
MCG-28	0	0	0	0	4.08051e-05	1.47154e-05	0.000154157	3.49364e-05	0	5.54211e-05	6.51466e-06	0	0	0	0	0	0	0	0.0127392	0.0693812	9.68626e-06	0.0292938	0.0484831	0	0	0.00536945	0.0330701	0.059182	0.0872878	0.122374	0	0	0	0	0.000161254	3.70466e-05	0	0.00281059	0.00620808	0	1.21115e-05	0.00364082	0.0789289	0.0688652	0	0.0138397	0.0833555	0.0644299	0.0113714
MCG-29	0	2.06203e-05	0	0	0	0	0	0	0	0	0	0	0	0	0	0	0	0	0	0.00155358	0	0.0586683	0.0606374	0	0	0	0	0	0	0	0	0	0	0	0	0	0	0.00782826	0.00501194	0	0	0.000331685	0.0261857	0.0350922	0	0.000121685	0.000209943	0	0
MCG-30	0	0	0	0	0	0	0	0	0	0	0	0	0	0	0.00504621	0.00056034	0	0	8.97127e-06	2.40865e-05	9.68626e-06	0	0	8.68659e-06	0	0	0	0	0	1.19111e-05	0	0	0	0	0	3.70466e-05	0	1.72429e-05	0	0	1.21115e-05	0.000462817	2.75349e-05	0	0	0.00232013	0.0564424	0.295308	0.316883
Unclassified	9.18109e-05	2.06203e-05	0.000304987	0.000956391	0.00116294	0.000132439	0.00100202	0.00054401	2.00844e-05	0.000461843	0.000156352	0	0.000960765	0.00408616	0.00324987	0.00572136	0.00662203	0.0026524	0.0141836	0.0337813	0	0.0324859	0	0.00464732	0.040455	0.0394575	0.0511763	0.0509031	0.0193923	0.00572327	8.82055e-05	0.000175786	0	0.000788304	0.00102361	0.00027785	1.2672e-05	0.000741443	0.00170524	0	4.84461e-05	0.00349426	0.0269429	0.0471991	0.00198201	0.0255133	0.0272765	0.00223676	0.00157833
Other	0.00438069	0.0147435	0.0173843	0.0235372	0.0316341	0.0206457	0.0438771	0.0242958	0.0119201	0.0237757	0.00343322	0.00795087	0.0444697	0.0759317	0.0126018	0.0361124	0.0360733	0.0103829	0.0189832	0.0195342	9.68626e-06	0.00535862	0	0.0250521	0.000803683	0.0162481	0.00808625	0.0226657	0.0149911	0	0.00696823	0.025864	0.0128213	0.0280923	0.0278269	0.00576075	0.0368629	0.0196569	0.017181	0	0.0137345	0.0202405	0.0262408	0.0187748	3.00305e-05	0.00654666	0.00173607	0.000346698	8.69943e-05
Crenarchaeota
Thermoprotei
Desulfurococcales	0	0	0	0	0	0	0	4.99092e-06	0	0	0	5.20005e-06	0	1.14458e-05	0	8.84747e-05	0	0	0	0	0	1.15239e-05	0.000153125	0	0	0	0	0	0	0	0	1.17191e-05	0	0	0	0	1.2672e-05	1.72429e-05	0.00358349	0.00431564	4.84461e-05	0	0.00265712	0.00164438	0.130573	0.000843683	0.00046026	0.00734776	0.0440067
Thermoproteales	4.37195e-06	8.2481e-05	0	1.24207e-05	3.06038e-05	5.88616e-05	3.85394e-05	0	1.00422e-05	1.84737e-05	6.51466e-06	1.04001e-05	0	2.28917e-05	0.00405891	1.47458e-05	0	0	0	3.61298e-05	1.93725e-05	0.00624597	0.000746483	0	0	9.98039e-06	5.12715e-05	3.92367e-05	0.000111707	2.38221e-05	0	1.17191e-05	7.14679e-06	0.000143328	7.01105e-06	7.40933e-05	0.00012672	0.0225364	0.278281	0.0993155	0.000230119	0.00159672	0.139106	0.225154	0.572846	0.0284094	0.158152	0.201745	0.278233
Deeply-branching T.protei	0	0	0	0	0	0	0	0	0	0	0	0	0	0	0	0	0	0	0	0	0	0	0	0	0	0	0	0	0	0	0	0	0	0	0	0	0	0	0	0	0	0	0	0	0	7.30111e-05	0.000339139	0.00691159	0.00782949
Other Thermoprotei	0	0	0	0	0	0	0	0	0	0	0	0	0	0	0.000630776	0	0	0	0	0	0	0.0417742	0	0	0	0	0	0	0	5.95554e-06	0	0	0	0	0	0	5.06881e-05	0.00115527	0.00588186	0.00174858	0	0.000200554	0.00330419	0.00842067	0.0185438	0.00165492	0.0094313	0.000536823	0.000932082
HWCG I	0	0	0	0	0	0	0	0	0	0	0	0	0	1.14458e-05	1.37125e-05	0	0	0	0.000251195	0.0251102	9.68626e-06	0.0151194	0.0467222	0	0	0.00201105	0.0141363	0.0356923	0.0567024	0.0580605	0	0	0	0	0	0	0	0	0	0	0	0	0.00240931	0.00240332	0	0.00122496	0.000589456	0.000503271	7.45666e-05
HWCG IV	0	0	0	0	0	1.47154e-05	0	0	0	0	0	0	0	0	0	0	0	0	0	0	9.68626e-06	0.0460266	0.163422	0	8.73568e-06	0	1.4649e-05	0	0	0	0	0	0	0	0	1.85233e-05	0	0	0	0	0	0	0	0	0.0154957	0.000202808	0.00939092	0.016731	0.0350339
Other Crenarchaeota	0	2.06203e-05	0.000197345	9.93653e-05	0.000132617	0	0.000443203	3.99273e-05	0	0	0	0	0	0.000125904	0	8.84747e-05	0.000302862	0	0.000502391	0.00521473	0	0.0364847	0.0405972	0.000416956	0	9.98039e-05	0.000593285	0	0	5.95554e-06	0	5.85954e-05	0	0	0.000231365	0	7.60321e-05	0.00100009	0	0	0	0.00290803	0.0274799	0.0328515	0.0436943	0.00024337	0.000968969	0.00426103	0.00549307
Euryarchaeota
Hadesarchaea	6.99512e-05	2.06203e-05	0.00396484	0.00322937	0.00920155	0.00431161	0.00944214	0.00893873	0.00825467	0.039349	0	0	0.00123527	0.00570003	0.00108329	0.00084051	0.022379	0.113067	0.0193331	0.019474	0	0.021688	0	0.042599	0.10613	0.0149606	0.00651148	0.0161394	0.0166667	0	0.000455728	0.00186333	0.00200825	0.00616311	0.010173	1.85233e-05	0.000468865	0.00474179	0.0206952	0.296533	0	0.000323972	0.00921044	0.00773401	0	0.000186584	0.000492559	0.00225913	0.00011185
Methanomicrobia	5.68353e-05	0.000185582	0.000358809	0.000198731	0.00109154	5.88616e-05	0.00109837	0.0241011	0.00145612	0.0152962	2.60586e-05	0	0.000294112	0.00135061	0.00540274	0.00137136	0	0	0	0	0	2.30478e-05	0	5.21195e-05	8.73568e-06	0	2.19735e-05	0	0	2.97777e-05	0.000132308	0.000152348	0.000142936	0.000501648	0.00240479	0.0227466	0.00653876	0.00125873	9.88548e-06	0.00416682	0.0263183	0.0122646	0.000302884	1.80701e-05	0	0.690547	0.410609	0.337494	0.228286
Thermoplasmata	0.0271673	0.0816356	0.293559	0.469886	0.421129	0.357923	0.314404	0.427133	0.414852	0.305019	0.0203713	0.100704	0.129252	0.240363	0.215451	0.230816	0.186817	0.0237809	0.00142643	0.000421514	1.93725e-05	5.76196e-05	7.65624e-05	0.041574	0.00104828	0.00275459	0.00066653	0	0	3.57332e-05	0.0653896	0.237979	0.35323	0.554536	0.500168	0.030193	0.156081	0.44159	0.277683	0.228282	0.0731294	0.218596	0.0276864	0.00397542	0.000240244	0.0650447	0.0128469	0.00290779	0.00060896
Other Euryarchaeota	0.000524634	0.00424777	0.000627915	0.000124207	0.000918114	0.00482665	0.00339146	0.00278493	0.000502109	0.000683527	0.000892508	0	0.00133331	0.000240363	0	0.000294916	0.00631917	0.00599624	3.58851e-05	1.20433e-05	0	0	0	0.00133773	0.000410577	0.000134735	5.12715e-05	0	0	5.95554e-06	0.0163327	0.00155864	2.14404e-05	0.000286656	0.00039963	0.000351943	0.0269407	0.0378136	0.0194299	0.0445329	0.00039968	0.0158592	0.000344187	0.000216841	9.00914e-05	0.00100593	0.0062337	0.00525639	0.0115702
Lokiarchaeota
Alpha	0.0182922	0.0706244	0.0691066	0.0710835	0.0803452	0.260051	0.166259	0.215453	0.256025	0.102935	0.0174397	0.141093	0.183487	0.148109	0.273099	0.28915	0.0410009	0.00885267	8.07414e-05	0	0.26273	5.76196e-05	1.91406e-05	0.0135424	0.000235863	0.000109784	7.3245e-06	0	4.46828e-05	1.19111e-05	0.0657131	0.16893	0.119973	0.104916	0.0530596	0.027044	0.148427	0.0691611	0.00778481	1.86019e-05	0.0351476	0.0345107	2.75349e-05	5.42103e-05	0	0.000170359	3.2299e-05	2.23676e-05	1.24278e-05
Beta	0.00160013	0.0112587	0.00880875	0.00770081	0.00591674	0.00753429	0.00720686	0.0487313	0.0757984	0.0272302	0.00340065	0.0279346	0.0165879	0.010679	0.00600609	0.00709272	0.00190721	0.0348893	8.97127e-06	0	0.00104612	2.30478e-05	0	0.00218033	0.000157242	0	1.4649e-05	1.30789e-05	0	0	0.0107464	0.0162426	0.0150154	0.0116812	0.00660441	0.186697	0.0422485	0.00891456	0.000825437	0	0.156227	0.0140233	0	0	0	0.00106272	0.00016957	1.11838e-05	2.48555e-05
Pacearchaeota	0.0145823	0.0145823	0.0145823	0.0145823	0.0145823	0.0145823	0.0145823	0.0145823	0.0145823	0.0145823	0.0145823	0.0145823	0.0145823	0.0145823	0.0145823	0.0145823	0.0145823	0.0145823	0.0145823	0.0145823	0.0145823	0.0145823	0.0145823	0.0145823	0.0145823	0.0145823	0.0145823	0.0145823	0.0145823	0.0145823	0.0145823	0.0145823	0.0145823	0.0145823	0.0145823	0.0145823	0.0145823	0.0145823	0.0145823	0.0145823	0.0145823	0.0145823	0.0145823	0.0145823	0.0145823	0.0145823	0.0145823	0.0145823	0.0145823
Thaumarchaeota
Marine Group I	0.518264	0.0649744	0.0525655	0.00101849	0.00234629	0.000559185	0.000635899	0.000304446	0.000100422	0.000351	0.569251	0.00288083	0.00217643	0.00238073	0.00133012	0.00184322	0.000147338	0	1.79425e-05	1.20433e-05	0	1.15239e-05	0	0	0	2.99412e-05	0	1.30789e-05	6.70241e-05	0	0.0974964	0.0149067	0.000536009	0.00207826	0.00127601	0.0141148	0.0285501	0.000862143	0	0.0214108	0.00829639	0.00607832	0	9.03506e-05	0	0.000186584	4.84484e-05	0	2.48555e-05
Unclassified	0.0176058	0.0185376	0.00627915	0.000906708	0.000979322	5.88616e-05	0.000635899	9.48274e-05	0.000100422	0.00014779	0.00441042	0	0.00180389	0.00203736	0.000342813	0.00153356	0	1.1335e-05	0.000457535	0.00121637	0	0.0478128	3.82812e-05	0.000842599	0	0.00051399	0.000681179	0	0	0	0.0370316	0.00625798	0.00102914	0.00071664	0.00129704	0.000185233	0.00345946	0.000551772	0	0.0106031	7.26691e-05	0.000725079	0.00396503	0.00558366	0.112059	0.000592201	0.000694428	0.00046972	0.000521966
Other	2.62317e-05	0	0	0.000149048	0.00047946	0.000206016	0.00115618	0.000264519	0.000110464	0.00609632	0	0	0	0.000846992	0	0	7.3669e-05	5.66752e-05	0	0	0	0	0	1.73732e-05	0	0	0	0	0	0	0.000617438	0.000539077	0.000471688	0.00114662	0.000967525	0.0013522	0.000582913	0.0018105	0	0	0	0.00036254	0	1.80701e-05	0	8.11234e-06	0	0	0
Thorarchaeota	0.00478728	0.0211151	0.0189451	0.0321074	0.0234833	0.0318294	0.0312169	0.010456	0.0146616	0.00539432	0.0103388	0.0841107	0.067332	0.0340056	0.101788	0.0612687	0.00366708	0.00190429	8.97127e-06	0	0	0	3.82812e-05	0.000694927	0	0	0	0	0	1.19111e-05	0.0237273	0.0594508	0.115735	0.0188476	0.0179833	0.00652021	0.0435664	0.010294	0	0	0.023133	0.0791108	0	0	0	0.00182528	0.0023336	0	0
Uncl. Asgard Phylum I	0	0	0	0	0	0	0	0	0	0	0	0	0	0	0	0	0	0	0	0	0	0.0490343	0.0855393	0	0	0	0	0	0	5.95554e-06	0	0	0	0	0	0	0	0	0	0	0	0	0	0	0	0	8.07474e-06	0	0
Other Asgardarchaeota	1.31158e-05	0.000494886	0.000448511	0.000434723	0.0008059	0.000706339	0.00188843	0.00129764	0.000873669	0.001404	9.77199e-05	0	0.000274504	0.00106446	0.000905027	0.00353899	0.00111322	0.00111083	0.000242224	0	0	0	0	0.00112057	0.000235863	7.98431e-05	0	0	0	0	0.000132308	7.03144e-05	0.000171523	0.000501648	0.00102361	0.000574223	0.000152064	0.000465557	0	1.86019e-05	0.0720151	0.00340942	0.0100503	0.00104807	0	0.0290827	0.019121	0.00584913	0.00101908
Woesearchaeota	0.337982	0.528312	0.262074	0.119648	0.102768	0.0948996	0.0958667	0.0500489	0.0517775	0.0209861	0.302358	0.248749	0.111017	0.0320827	0.0598826	0.0547511	0.0388891	0.0892634	0.000457535	1.20433e-05	1.93725e-05	0.000103715	5.74218e-05	0.0240358	0.00231496	0.000528961	7.3245e-06	2.61578e-05	2.23414e-05	2.38221e-05	0.549902	0.19906	0.141699	0.0681525	0.0419541	0.647761	0.185861	0.120528	0.0182041	0.0279028	0.486447	0.272869	0.000220279	0.000325262	4.50457e-05	0.0135638	0.0112723	0.000503271	0.000173989
Other Archaea	0.00152144	0.0101864	0.00902404	0.00393735	0.00603915	0.00665136	0.00346854	0.00243557	0.000763205	0.002808	0.000403909	0.0150593	0.00329405	0.00347953	0.00802183	0.00243305	0.00107229	6.80102e-05	0	0	0	0	0	0.00416088	0	0	0	0	0	0	0.00282257	0.00525014	0.00587466	0.00365487	0.00401032	0.00318601	0.00476468	0.00343133	0.0119169	1.86019e-05	0.0120025	0.0251849	0.000674606	0	3.00305e-05	0.0141155	0.015778	0.00411564	0.00628845
[truncated: 10 more columns]

## Sheet: Methane-cycling archaea
Station name	NSA - MUC02					NSA - GC13					NSA - MUC12						NSA - GC09							NSA - GC10							SA - Cold Site					SA - Yellow Mat					SA - Cathedral Hill					SA - Orange Mat
Sample ID	St15-0-1	St15-4-6	St15-14-16	St15-28-32	St15-36-40	St9-26	St9-76	St9-176	St9-326	St9-476	St40-0-1	St40-3-4	St40-6-8	St40-10-12	St40-16-18	St40-28-32	St51-37	St51-137	St51-237	St51-337	St51-387	St51-437	St51-487	St58-48	St58-148	St58-248	St58-348	St58-398	St58-448	St58-498	CS-01	CS-05	CS-15	CS-25	CS-40	YM-01	YM-05	YM-15	YM-25	YM-35	CH-01	CH-05	CH-15	CH-20	CH-25	OM-01	OM-05	OM-15	OM-20
Depth (cm)	0.5	5	15	30	38	26	76	176	326	476	0.5	3.5	7	11	17	30	37	137	237	337	387	437	487	48	148	248	348	398	448	498	0.5	4.5	14.5	24.5	39.5	0.5	4.5	14.5	24.5	34.5	0.5	4.5	14.5	19.5	24.5	0.5	4.5	14.5	19.5
ANME-1-Gba	0	0	0	0	0	0	0	0	0	0	6.51466e-06	0	1.96075e-05	1.14458e-05	0.00122042	1.47458e-05	0	0	0	0	0	0	0	0	0	0	1.4649e-05	0	0	5.95554e-06	0	0	7.14679e-06	0	0	0	0	0	0	0	4.84461e-05	0.000408821	0	0	0	0.0140181	0.290182	0.331846	0.226707
ANME-1a-b	5.24634e-05	2.06203e-05	0.000304987	0.000198731	0.00107113	0	0.0010791	0.0240213	0.00144607	0.0152962	1.9544e-05	0	0.000274504	0.00132772	0.00252311	0	0	0	0	0	0	0	0	1.73732e-05	0	0	0	0	0	5.95554e-06	5.88036e-05	7.03144e-05	1.42936e-05	0.000429984	0.00237675	0	1.2672e-05	0.000344857	0	0	3.63346e-05	0.0109842	9.63723e-05	1.80701e-05	0	0.0177498	0.00130003	7.82866e-05	0
ANME-1-AT	0	0	1.79404e-05	0	0	4.41462e-05	0	0	0	0	0	0	0	1.14458e-05	0.00165922	0.00129763	0	0	0	0	0	2.30478e-05	0	3.47464e-05	0	0	7.3245e-06	0	0	1.78666e-05	0	2.34381e-05	5.00275e-05	0	0	0.00011114	0	0	0	0	0.000290677	0.000424249	5.50699e-05	0	0	0.658746	0.11911	0.00556954	0.00157833
Methanoculleus	0	0	0	0	0	0	0	0	0	0	0	0	0	0	0	0	0	0	0	0	0	0	0	0	0	0	0	0	0	0	0	0	0	0	0	0	0	0	0	0	0	0	0	0	0	0	0	0	0
ANME-2	0	0	0	0	0	1.47154e-05	1.92697e-05	5.49001e-05	1.00422e-05	0	0	0	0	0	0	0	0	0	0	0	0	0	0	0	0	0	0	0	0	0	0	0	0	0	0	0.00407513	0.00171072	0.000103457	0	0	0.025846	0.000269976	0	0	0	1.62247e-05	8.07474e-06	0	0
Other M.sarcinales	0	0	0	0	1.02013e-05	0	0	2.49546e-05	0	0	0	0	0	0	0	0	0	0	0	0	0	0	0	0	8.73568e-06	0	0	0	0	0	0	0	0	7.1664e-05	1.40221e-05	0.0184122	0.00481537	0.000810415	9.88548e-06	0.00416682	4.84461e-05	0.000177413	0.000151442	0	0	1.62247e-05	8.07474e-06	0	0
Uncl. M.microbia	4.37195e-06	0.000164962	3.58809e-05	0	1.02013e-05	0	0	0	0	0	0	0	0	0	0	5.89831e-05	0	0	0	0	0	0	0	0	0	0	0	0	0	0	7.35045e-05	5.85954e-05	7.14679e-05	0	1.40221e-05	0.000148187	0	0	0	0	4.84461e-05	0	0	0	0	0	0	0	0
SUM M.MICROBIA	5.68353e-05	0.000185582	0.000358809	0.000198731	0.00109154	5.88616e-05	0.00109837	0.0241011	0.00145612	0.0152962	2.60586e-05	0	0.000294112	0.00135061	0.00540274	0.00137136	0	0	0	0	0	2.30478e-05	0	5.21195e-05	8.73568e-06	0	2.19735e-05	0	0	2.97777e-05	0.000132308	0.000152348	0.000142936	0.000501648	0.00240479	0.0227466	0.00653876	0.00125873	9.88548e-06	0.00416682	0.0263183	0.0122646	0.000302884	1.80701e-05	0	0.690547	0.410609	0.337494	0.228286
[truncated: 10 more columns]
