# Supplementary material for: Interactions between temperature and energy supply drive microbial communities in hydrothermal sediment
Source: Commun Biol. 2021 Aug 25;4:1006. doi: 10.1038/s42003-021-02507-1 (PMC8387401; doi:10.1038/s42003-021-02507-1)
Supplement: Supplementary file 6 — Supplementary Data 3 [file 42003_2021_2507_MOESM6_ESM.xlsx]

## Sheet: Supplementary_BAC
	CH-01	CH-05	CH-15	CH-20	CS-01	CS-05	CS-15	CS-25	CS-40	EM-01	EM-03	EM-05	EM-06	EM-07	EM-08	EM-10	YM-01	YM-05	YM-15	YM-25	YM-35	OM-01	OM-05	OM-15	OM-20	OM-25	OM-30	MUC02-0-1	MUC02-4-6	MUC02-14-16	MUC02-28-32	MUC02-36-40	MUC12-0-1	MUC12-3-4	MUC12-6-8	MUC12-10-12	MUC12-16-18	MUC12-28-32	GC13-26	GC13-76	GC13-176	GC13-326	GC13-476	GC09-37	GC09-137	GC09-237	GC09-337	GC10-48	GC10-148
ZOTU2082	0	2.09e-05	0.0232832	0.00275487	0	0	0	0	0	0	0	0	0	0	0	0	0	0	0	0	0	0.00746696	0.00248716	0.000256016	0	0	0	0	0	0	0	0	0	0	0	0	0	0	0	0	0	0	0	0	0	0	0	0	0
ZOTU9172	0	0	0	0	0	0	0	5.18e-05	3.8e-05	0	0	0	0	0	0	0	0	0	0	0	0	0	0	0	0	0	0	1.91e-05	1.68e-05	1.8e-05	2.33e-05	3.38e-05	0	0	0	5.92e-05	0	0	0.000437365	0.000310297	0.000859036	0.0002623	0.00392276	0.00600651	0	0	0	0.00809293	0.000636094
ZOTU1005	1.33e-05	0.000711312	8.02e-05	0	0	0	0	0	0	0.00126287	0.000545127	0.000490763	0.00778953	0	0.00138989	0	0	0	0	0	0	3.37e-05	0	0	0	0	0	0	0	0	0	0	0	0	0	0	0	0	0	0	0	0	0	0	0	0	0	0	0
ZOTU1216	0	0	0	0	0	0	0	3.45e-05	0.000133153	0	0	0	0	0	0	0	0	0	0	0	0	0	0	0	0	0	0	0	0	0	0	0	0	0	0	0	0	0	0.000207173	0.000598431	0.00153399	0.000992993	0.00521766	0.00252667	0	0	0	0.000367026	0
ZOTU6327	1.33e-05	0.000209209	0.132187	0.129022	0	6.96e-05	0	0	0	0.000918454	0.0175419	0.00712397	0.00760994	0.00124048	0	0	0	0	8.79e-05	0	0.000182692	0.0127596	0.00749419	0.00168239	0.00329124	0.00838209	0	0	0	0	0	0	0	0	0	0	0	0	0	0	0	0	0	0	0	0	0	0	0
ZOTU633	0	0	0.000748483	0.00322759	0	0	0	0	0	1.64e-05	0	0	0	0	0	0	0	1.72e-05	0	0	0	0.00359021	0.0660078	0.0814864	0.0344909	0.0415683	0.0166183	0	0	0	0	3.38e-05	0	0	0	0	2.15e-05	0	0	0	0	0	0	0	0	0	0	0	0
ZOTU736	0	0	0.00358203	0.0537117	0	0	0	0	0	0.00119727	0.0284724	0.00888122	0.00888949	0.0552656	0	0	0	0	2.2e-05	0	0.00575479	0	0	0	0	0	4.03e-05	0	0	0	0	0	0	0	0	0	0	0	0	0	0	0	0	0	0	0	0.0229011	0	0
ZOTU635	0.000133188	0.00466537	0	0	0	0	0	0	0	0.000295217	0.000209664	0.00120316	0.00197544	0.0225853	0.0115504	0	0	0.000257688	0.00400018	0.00491442	0.0144875	0.00112932	0.000441797	0	0	0	0.000645369	0	0	0	0	0	0	0	0	0	0	0	0	0	0	0	0	0	0	0	0	0	0
ZOTU686	5.33e-05	0.000564865	2.67e-05	0	0	1.39e-05	0.000109228	0.0004833	0.000989138	0	0	0	0	0	0	0	0	8.59e-05	0.00325289	0.000227257	0	0	0	0	0	0	0	0	1.68e-05	0.000739939	0	0.000303838	0	0	0	7.9e-05	0.000624462	0.000331644	0.0052714	0.00308081	0.00672912	0.00693221	0.00215181	0.000257206	0.00027859	0	0	7.34e-05	0
ZOTU1090	0	0	0	0	0	1.39e-05	0	3.45e-05	0.000133153	0	0	0	0	0	0	0	0	0	0	0	0	0	0	0	0	0	0	0	0	0	0	0	1.98e-05	0	0	1.97e-05	0	0	9.21e-05	0.000620595	0.00132946	0.00166748	0.00900712	0.00506846	0	0	0	0.000844161	0
ZOTU13547	0.000186463	0.000209209	0	0	4.78e-05	0.000306407	0.0029273	0.00195046	0.000989138	0.000196812	0	0	0	0	0	0	0.000101595	0.000532555	0.000109895	0	0	1.69e-05	1.64e-05	0	0	0	0	1.91e-05	0.000117778	0.000252662	0.000699872	0.00124911	3.96e-05	0.00010758	0.000274824	0.00067126	0.000150732	0.000442193	0	2.22e-05	0.000306799	0.00013115	0	0	0	0	0	0	0
ZOTU782	0.00269039	0.00263604	0	0.000309719	0.00321964	0.0130362	0.0318726	0.0112022	0.00407069	0.00142688	0.000615015	0.00193139	0	0.0674566	0	0	0.00308172	0.0130562	0.00127478	0	0	0.000438242	3.27e-05	0	0	0	0	0.00343866	0.00738634	0.00776033	0.0158171	0.0100604	0.00358352	0.0292618	0.0199353	0.016209	0.0263351	0.0127499	0.000644538	4.43e-05	6.14e-05	0	0	0	0	0	0	0	0
ZOTU6052	9.32e-05	0	0	0	0.000589735	0.00122563	0.00249039	0.00046604	0	0.000114807	0	0	0	0	0	0	0.000982085	0.00180381	0	0	0	0	0	0	0	0	0	0.000592213	0.00114413	0.000505324	0.00247288	0.00104656	0.000732543	0.0065839	0.00528508	0.00122406	0.00633075	0.000405343	0	0	0	0	0	0	0	0	0	0	0
ZOTU2046	0.000186463	0.000271972	0	6.52e-05	0.000685368	0.00164345	0.0038885	0.00160525	0.000418482	4.92e-05	0	0	0	0	0	0	0.000118528	0.000669988	0.000241769	0	0	0	0	0	0	0	0	0.000668628	0.00102635	0.00149792	0.00193631	0.00172175	0.000692946	0.00471201	0.00300192	0.00254684	0.00279931	0.00101336	0.000184154	2.22e-05	0	0	0	0	0	0	0	0	0
ZOTU1741	1.33e-05	4.18e-05	0	0	0.000286898	0.000417827	0.000305837	6.9e-05	0	1.64e-05	0	0	0	0	0	0	0.000101595	0.000257688	0	0	0	0	0	0	0	0	0	0.000649524	0.000723492	0.000469229	0.00102648	0.000303838	0.000574155	0.00854186	0.00372069	0.000572545	0.00191645	0.000497467	0	0	0	0	0	0	0	0	0	0	0
ZOTU11114	0	0	0	0	0.000860695	0.00101671	0.000699056	0	0	1.64e-05	0	0	0	0	0	0	0	3.44e-05	0	0	0	0	0	0	0	0	0	0.000668628	0.00106	0.000360946	0.000793188	0.000202559	0.00051476	0.00649784	0.0017335	9.87e-05	0	0	0	0	0	0	0	0	0	0	0	0	0
ZOTU4935	0.0002131	0.000104605	0	0	0.000940389	0.000905292	0.00124519	0.000224389	0.000190219	1.64e-05	0	0	0	0	0	0	0.000457178	0.000360763	8.79e-05	0	0	6.74e-05	0	0	0	0	0	0.00099339	0.00159841	0.000956506	0.000559897	0.000337598	0.000712744	0.00142006	0.00160666	0.000236915	0.000990525	0.000184247	4.6e-05	0	0	0	0	0	0	0	0	0	0
ZOTU956	0	0	0	0	0	1.39e-05	0	0	0	0	0	0	0	0	0	0	0	0	0	0	0	0	0	0	0	0	0	0	0	0	0	0	0	0	0	0	0	0	0	0	0	0	0	0	0	0.00393147	0	0	0.000914386
ZOTU3647	0.00086572	0.000167368	2.67e-05	0.00109217	0.00092445	0.00143454	0.00190056	0.0004833	0	1.64e-05	0	0	0	0	0	0	0.00027092	0.000309225	0	0	0	0.000404531	8.18e-05	0	0	0	0	0.000152829	0.000504762	0.000487277	0.000723201	0.000607677	0.000316775	0.00139854	0.00103587	0.000375116	0	0	0	0	0	0	0	0	0	0	0	0	0
ZOTU3332	0	0	0	0	0.000175327	0.00103064	0.00137627	0.000690429	7.61e-05	0	0	0	0	0	0	0	0	0.000188971	0	0	0	0	0	0	0	0	0	0.000133726	0.000269206	0.000270709	0.00097982	0.000641437	5.94e-05	0.0010758	0.000782191	0.000730489	0.00295004	0.0016398	0.000138115	0.000199477	4.09e-05	0	0	0	0	0	0	0	0
ZOTU6332	1.33e-05	0	0	0	0.000286898	0.000306407	0.000283992	0.000345214	0.000152175	1.64e-05	0	0	0	0	0	0	0	0.000223329	0	0	0	0	0	0	0	0	0	0.00042028	0.000504762	0.00039704	0.000956491	0.00111407	0.000138589	0.00144157	0.00101473	0.00221121	0.00142119	0.00105021	0	0	0	0	0	0	0	0	0	0	0
ZOTU4666	0.000159825	0.000313814	0	0	0.00245457	0.0014624	4.37e-05	0.000103564	3.8e-05	0.000311618	5.59e-05	0	0	0	0	0	0.000118528	0.00149459	8.79e-05	0	0	0	0	0	0	0	0	0.00120353	0.00116095	0.00113698	7e-05	3.38e-05	0.00116811	0.000408804	0.000317105	0	0	0	0	0	0	0	0	0	0	0	0	0	0
ZOTU4478	5.33e-05	0	0	0	0.000573797	0.000779944	0.000655365	0	0	0	0	0	0	0	0	0	0.00020319	0.000360763	0	0	0	0	0	0	0	0	0	0.000821457	0.000824444	0.00066775	0.00135308	0.000371358	0.000336574	0.00367924	0.000909033	0.000157944	0	0	0	0	0	0	0	0	0	0	0	0	0
ZOTU11291	9.32e-05	0.000167368	0	0	0.000653491	0.000752089	0.000808284	0.000276172	9.51e-05	3.28e-05	0	0	0	0	0	0	0.000118528	0.000429479	2.2e-05	0	0	0	0	0	0	0	0	0.000706835	0.000521587	0.000613608	0.000279949	0.000337598	0.000574155	0.00251737	0.00158552	0.000592288	0.000236865	9.21e-05	4.6e-05	2.22e-05	0	0	0	0	0	0	0	0	0
ZOTU3438	2.66e-05	4.18e-05	0	0	0.000589735	0.00160167	0.00181318	0.000120825	3.8e-05	9.84e-05	5.59e-05	0	0	0	0	0	5.08e-05	0.000532555	4.4e-05	0	0	0	0	0	0	0	0	0.000171933	0.000908571	0.00117307	0.000233291	0.000540157	0.000296977	0.00131248	0.000317105	0.000355373	0.000538329	0.00027637	0	0	0	0	0	0	0	0	0	0	0
ZOTU3516	0.00254389	0.000606707	0	0	0.000175327	0.000194986	0	0	0	0.000246015	0.000195687	0	0	0	0	0	0.00347116	0.000704346	6.59e-05	0	0	0.00055623	0	0	0	0	0	1.91e-05	3.37e-05	1.8e-05	2.33e-05	3.38e-05	0.000475163	0	0.00122614	0	0	0.000184247	0	0	0	0	0	0	0	0	0	0	0
ZOTU3794	0.00010655	4.18e-05	0	0	0.000111572	0.000194986	0.00087382	0.000276172	5.71e-05	3.28e-05	0	0	0	0	0	0	1.69e-05	0.000515375	0	0	0	0	0	0	0	0	0	7.64e-05	8.41e-05	9.02e-05	0.000466581	0.000573917	0.000356372	0.00258192	0.00171236	0.000454088	0.000624462	0.00090281	0	2.22e-05	0	0	0	0	0	0	0	0	0
ZOTU3817	0	8.37e-05	0	0	0.000334715	0.000654596	0.00139811	0.000414257	0.000323372	3.28e-05	0	0	0	0	0	0	0	0.000154613	6.59e-05	0	0	0	0	0	0	0	0	0.000343866	0.000504762	0.000324851	0.000559897	0.000506397	0.000336574	0.0005379	0.000782191	0.000572545	0.00139966	0.000497467	9.21e-05	2.22e-05	0	0	0	0	0	0	0	0	0
ZOTU12260	0.00290349	0.00104605	5.35e-05	0	0.027861	0.0262256	0.00467494	0.00108743	0.000266307	0.00662599	0.00308905	0	0	0	0	0	0.00382675	0.0197045	0.000329685	0	0	0.000134844	1.64e-05	0	0	0	0	0.00758415	0.0119965	0.00611803	0.000699872	0.000675197	0.00932507	0.0087355	0.011606	0.000256658	0.000193798	0.000350069	2.3e-05	0	0	0	0	0	0	0	0	0	0
ZOTU4592	0.00668602	0.00161091	2.67e-05	0	0.000334715	0.000236769	0.00043691	0.000379736	7.61e-05	0.00203372	0.00146765	0.00389444	0	0	0.0294273	0	0.0100071	0.00281738	0.000109895	0	0	0.000707929	6.55e-05	0	0	0	0	0.000114622	0.000252381	0.000270709	0.000209962	0.000405118	0.000356372	0.000731545	0.00179693	0.000651517	0.000215332	0.000257946	0.000138115	0.000132985	4.09e-05	0	0	0	0	0	0	0	0
ZOTU7063	2.66e-05	0.000104605	0	0	0	0	0	0	0	0.000885652	0.00127196	0	0	0	0	0	0	0.000377942	0.0132973	0.0302677	0.0144144	0	1.64e-05	0	0	0	0	0	0	0	0	0	0	0	0	0	0	0	0	2.22e-05	2.05e-05	0.000206093	0	0	1.74e-05	0	0	0	0
ZOTU2097	0	0	0	0	0	4.18e-05	0	0.000138086	0.000247285	0	0	0	0	0	0	0	0	1.72e-05	0	0	0	0	0	0	0	0	0	0	0	0	2.33e-05	0.000135039	0	0	6.34e-05	0.000236915	0	0	0	0.00283701	0.00286345	0.00181736	0.00175191	0.000166427	0.00642499	0.00693369	4.9e-05	0.000458783	0.00578448
ZOTU713	0.000412882	0.000564865	0	0	0.00215174	0.00395543	0.00458756	0.00177785	0.000817941	1.64e-05	0	0	0	0	0	0	0.000152393	0.00254252	0.00145061	0	0.000913459	1.69e-05	0	0	0	0	0	0.000382073	0.000925396	0.00101065	0.00174968	0.00111407	0.000178186	0.00557265	0.00276938	0.0037709	0.00695521	0.00359281	0.001197	0.00115253	0.000715864	0.00101173	9.52e-05	4.54e-05	0	0	0	0	0
ZOTU5533	0.000199782	0.000209209	0	0	0.000462225	0.00167131	0.00198794	0.00162251	0.000913051	9.84e-05	0	0	0	0	0	0	8.47e-05	0.00151177	0.000593433	0	0	0	0	0	0	0	0	0.000439384	0.0011273	0.0012994	0.0020063	0.00219439	0.000178186	0.011382	0.00511596	0.00440268	0.00508183	0.00801474	9.21e-05	8.87e-05	0	0	0	1.51e-05	0	0	0	0	0
ZOTU1900	0.000146506	0.000104605	0	0	0.014058	0.00470752	0.00242485	0.000897558	0.000570657	0.000574034	0.000279552	0	0	0	0	0	0.000186258	0.00302353	6.59e-05	0	0	1.69e-05	1.64e-05	0	0	0	0	0.00767967	0.00486254	0.00285147	0.00177301	0.00108032	0.00108891	0.000408804	0.00107816	0.00165841	0.000322997	0.000681713	0	0	0	0	0	0	0	0	0	0	0
ZOTU1418	0.00010655	4.18e-05	0	0	0.00862289	0.0103621	0.000218455	0.000120825	0	0.000885652	0.0014956	0	0	0	0	0	0.000287853	0.00508504	4.4e-05	0	0	1.69e-05	0	0	0	0	0	0.000649524	0.0012619	0.000270709	7e-05	3.38e-05	0.000356372	0.000344256	0.000570788	0.000118458	0	0.000386918	0	0	0	0	0	0	0	0	0	0	0
ZOTU675	0.000119869	2.09e-05	0	0	0.00454256	0.000738162	0	0	0	0.000180411	0	0	0	0	0	0	8.47e-05	0.000446659	0	0	0	1.69e-05	0	0	0	0	0	0.00586482	0.00109365	0.00086627	0	0	0.00417747	0.000645481	0.000401666	0	0	0	0	0	0	0	0	0	0	0	0	0	0
ZOTU4771	6.66e-05	8.37e-05	0	0	0.000573797	0.00139276	0.00155103	0.000742211	0.000608701	0	0	0	0	0	0	0	3.39e-05	0.000858959	0.000307706	0	0	0	1.64e-05	0	0	0	0	0.000343866	0.000572063	0.000541419	0.00179634	0.000843996	0.000217783	0.000344256	0.000930174	0.00142149	0.00215332	0.00191617	0.00029925	0	0	0	0	0	0	0	0	0	0
ZOTU1284	5.33e-05	8.37e-05	0	0	0.00227925	0.00101671	8.74e-05	0	1.9e-05	0.00034442	8.39e-05	0	0	0	0	0	0.000440245	0.000876138	0	0	0	0.000387675	3.27e-05	0	0	0	0	0.00204409	0.00153111	0.00119112	0.000116645	3.38e-05	0.0012671	0.000580933	0.00232543	9.87e-05	0	1.84e-05	0	0	0	0	0	0	0	0	0	0	0
ZOTU2824	0.000146506	0.000251051	0	0	0.000382531	0.000835655	0.00205348	0.000345214	0.000570657	1.64e-05	0	0	0	0	0	0	0	0.000669988	0.000835202	0	0	1.69e-05	0	0	0	0	0	0.000152829	0.000420635	0.000288757	0.000116645	0.000135039	7.92e-05	0.000494868	0.000486227	0.000730489	0.00185185	0.00228466	0.000483403	0.000243805	0.000102266	1.87e-05	0	9.08e-05	0	0	0	0	0
ZOTU297	1.33e-05	0	0.0171349	0.0266358	0	0	0	0	0	0	0	0	0	0	0	0	0	0	0.000109895	0	0	0	0	0	0	0	0	0	0	0	0	0	0	0	0	0	0	0	0	0	0	0	0	0	0	0	0	0	0
ZOTU3335	0	0.00121342	8.02e-05	0	0	0	0	0	0	0	0	0	0	0	0	0	0	0	0.000725307	0.0183794	0.0141221	0	0	0	0	0	0	0	0	0	0	0	0	0	0	0	0	0	0	0	0	0	0	0	0	0	0	0	0
ZOTU3307	0	0	0	0	0	0.000153203	4.37e-05	0.000914818	0.0019973	0	0	0	0	0	0	0	0	0	0	0	0	0	0	0	0	0	0	0	0	0.00019852	0.000419923	0.00148543	0	0	8.46e-05	0.00339579	0.000366064	0.000626439	0.00393628	0.00279268	0.00145218	0.000749429	9.52e-05	0.00944096	0.00170637	0	0	0.00368862	0
ZOTU7306	0	0.000355656	0	0	1.59e-05	0	0	0	0	0	0	0	0	0	0	0	0	0	0.000769265	0.00328102	0.0177576	0	0	0	0	0	0	0	0	0	0	0	0	0	0	0	0	0	0	0	0	0	0	0	0	0	0	0	0
ZOTU716	0	0.000334735	0	0	0.000541919	0.00388579	0.0034079	0.0308967	0.0613266	1.64e-05	0	0	0	8.56e-05	0	0	0	0.00063563	0.000813223	1.42e-05	0	0	0	0	3.36e-05	0	0	0.000745043	0.00153111	0.0129399	0.010988	0.0309915	0.000118791	0.000129096	0.00122614	0.0274032	0.00572782	0.0136158	0.128861	0.0913604	0.0796449	0.0573688	0.0475302	0.029503	0.000557181	0.0324764	0	0.0486493	0.0288827
ZOTU196	0	0	0	0	0	0	0	0	0	0	0	0	0	0	4.79e-05	0	0	0	0	0	0	0	0	0	0	0	0	0	0	0	0	0	0	0	0	0	0	0	0	0	0	0	0	0	0	0.0192047	0.0709347	0	0
ZOTU3681	0.0002131	0.000606707	0	0	0.00478164	0.00538997	0.0112067	0.00768102	0.0033859	9.84e-05	0	0	0	0	0	0	6.77e-05	0.0021474	0.000989054	0	0	0	0	0	0	0	0	0.00108891	0.00297809	0.00411478	0.00846845	0.00843996	0.000356372	0.000946705	0.0028328	0.00576494	0.0203273	0.00961769	0.00214079	0.00075358	0.000470425	0	0	0.000166427	0	0	0	0	0
ZOTU177	0	0	0	0	0	0	0	1.73e-05	0	0	0	0	0	0	0	0	0	0	0	0	0	0	0	0	0	0	0	0	0	0	0	0	0	0	0	0	0	1.84e-05	2.3e-05	2.22e-05	0	0	1.9e-05	0.000968303	0	0.0120565	0	0.00950598	0.00999861
ZOTU559	0.000772489	0.00177828	0	0	6.38e-05	0.00100279	0.0129544	0.00245102	0.000570657	0	0	0	0	0	0	0	1.69e-05	0.00197561	0.0203745	0.00142035	0	0	4.91e-05	0	0	0	0	7.64e-05	0.000134603	0.00108284	0.00450251	0.00367982	0	0.000839125	0.000528508	0.00268504	0.012037	0.0105758	0.000437365	0.00075358	0.000224986	0.0002623	0	0	0	0	0	0	0
ZOTU292	0	0	0	0	0	0	0	0.000224389	0.00070381	0	0	0	0	0	0	0	0	0	0	0	0	0	0	0	0	0	0	5.73e-05	0	0.000180473	9.33e-05	0.000540157	0	0	4.23e-05	0.00067126	0	0.000128973	0.00057548	0.000820072	0.000286345	1.87e-05	9.52e-05	0.024601	0.0216082	0	0	0.00983631	0.0060429
ZOTU2424	0	0.000334735	0	0	0.000175327	0.00200557	0.00242485	0.0106671	0.00817942	4.92e-05	0	0	0	4.28e-05	0	0	0	0.000377942	0.000131874	0	0	0	0	0	0	0	0	0.000248348	0.00065619	0.00413283	0.00438586	0.00965531	1.98e-05	0.00021516	0.000359385	0.00345502	0.00400517	0.0032796	0.00122002	0.00243805	0	1.87e-05	0.000209468	0.000484152	0	0	0	0	0
ZOTU245	0	0	0	0	0	1.39e-05	0	0	0	0	0	0	0	0	0	0	0	0	0	0	0	0	0	0	0	0	0	0	0	0	0	0	0	0	0	0	0	0	0	0	0	0	0	0	0	0.0476304	0	0	0
ZOTU1105	0	0	0	0	0	0	0	0	0	0	0	0	0	0	0	0	0	0	2.2e-05	0	1.83e-05	0	0	0	0	0	0	0	0	0	0	0	0	0	0	0	0	0	0	0	0	1.87e-05	0.000114255	0	0.0259437	0	0	0.0139654	0.00846801
ZOTU13607	0	0	0	0	1.59e-05	8.36e-05	2.18e-05	0.00207129	0.00308155	0	0	0	0	0	0	0	0	0	0	0	0	0	0	0	0	0	0	0	6.73e-05	0.000415088	0.000769859	0.00141791	0	0	0	0.000552803	0	0.000368494	0.00342986	0.000908728	0.00490878	0.00279162	0.00794074	0.0151751	0	2.38e-05	0	0.00245908	0
ZOTU11393	0	0	0	0	1.59e-05	4.18e-05	0.000109228	0.000914818	0.00184512	0	0	0	0	0	0	0	0	0	0	0	0	0	0	0	0	0	0	0	0	0.000469229	0.000303278	0.000438878	0	0	2.11e-05	0.00120432	0	0.000165822	0.00296948	0.0032138	0.00435654	0.00252932	0.00335149	0.00538619	0.00154966	0.000953084	0	0.0090472	3.98e-05
ZOTU1176	1.33e-05	0	0	0	0	0	0	0.000120825	0.000437504	0	0	0	0	0	0	0	0	0	0	0	0	0	0	0	0	0	0	0	0	5.41e-05	2.33e-05	0.000101279	0	0	0	0.00067126	0	0	0.00110492	0.000886564	0.00578827	0.00121782	0.00485585	0.0175808	5.22e-05	0	0	0.00523013	0
ZOTU1209	0.000359607	0.0330551	0.000267315	0.000798748	0	0	0	0	0	0	0	0	0	0	0	0	0	0	0	0	0.00067596	0.000893339	0.000245443	0	0	0	0	0	0	0	0	0	0	0	0	0	0	0	0	0	0	0	0	0	0	0	0	0	0
ZOTU350	0.000332969	0.0337246	0.000106926	0	0	0	0	0	0	0	0	0	0	0	0	0	0	0	0	0	0	0	0	0	0	0	0	0	0	1.8e-05	0	0	0	0	0	0	0	0	0	0	0	0.00133024	0.000209468	0	0	0	0	0	0
ZOTU386	0	0	0	0	0	0	0	0	0	0	0	0	0	0	0	0	0	0	0	0	0	0	0	0	0	0	0	0	0	1.8e-05	0	0	0	0	0	0	0	0	0	0	0	0	0	0.000605189	0.0298614	0	0	0.00212875	0
ZOTU4377	0	0.00023013	0	0	4.78e-05	0.000487465	0.000502447	0.0033831	0.00188317	0	0	0	0	0	0	0	0	6.87e-05	0.000153853	0	0	0	0	0	0	0	0	5.73e-05	0.000252381	0.00115503	0.0011198	0.00452382	3.96e-05	0	0.000338245	0.0033563	0.00478036	0.00523261	0.000782653	0.000820072	0.000286345	1.87e-05	0.000133298	0.000226946	0	0	0	0	0
ZOTU10796	0	0	0	0	0	0	0	0.00270993	0.00458428	0	0	0	0	0	0	0	0	0	0	0	0	0	0	0	0	0	0	1.91e-05	3.37e-05	0.00108284	0.00025662	0.00219439	0	0	6.34e-05	0.0025271	0.000322997	0.00226624	0.00269325	0.00121903	0.000920396	0	0	0.00346471	0.00196754	0	0	0.00319313	0.000198779
ZOTU1071	0	0.00322183	0.0109332	0.00640629	0	0	0	0	0	0	0	0	0	0	0	0	0	0	0.000967075	0	0	0.00566343	0.000212717	7.31e-05	0	0	0	0	0	0	0	0	0	0	0	0	0	0	0	0	0	0	0	0	0	0	0	0	0
ZOTU603	0.000599345	0.00228038	2.67e-05	0	0	0	0	0	0	0	0	0	0	0	0	0	1.69e-05	0.00218176	0.0159567	0.00191748	0	0	0	0	0	0	0	0	0	0	0	0	0	0	0	0	0	0	0	0	0	0	0	1.51e-05	0	0	0	0	0
ZOTU3969	0	0	0	0	0	0	0	0.000172607	0.000932073	0	0	0	0	0	0	0	0	0	0	0	0	0	0	0	0	0	0	0	0	0.000469229	9.33e-05	0.000202559	1.98e-05	0	0	0.000157944	0	0	0.0027623	0.0057405	0.00484742	9.37e-05	0.00260883	0.00393373	0	0	0	0.000807458	0.000139146
ZOTU2572	0	0	0	0	0	0	0	0	3.8e-05	0	0	0	0	0	0	0	0	0	0	0	0	0	0	0	0	0	0	0	0	0	0	0	0	0	0	0	0	0	2.3e-05	0	0	0	0	6.05e-05	0	0.000762468	0	0.0192689	0
ZOTU1523	0	0	0	0	0	1.39e-05	0	0.000742211	0.00167393	0	0	0	0	0	0	0	0	0	0	1.42e-05	0	0	0	0	0	0	0	1.91e-05	0	5.41e-05	4.67e-05	0.000742716	0	0	0.000105702	0.00100689	0	0	0.00306155	0.00826721	0.00116584	0	0.0011616	0.000453892	0	0	0	0.000844161	0.00067585
ZOTU5797	2.66e-05	0.000460261	0	0	1.59e-05	0.000417827	0.000415065	0.00205403	0.00135055	0	0	0	0	0	0	0	0	0.000257688	0.00147259	0	0	0	0	0	0	0	0	0.000191037	0.000286032	0.00147988	0.000886504	0.00212687	0	0.000408804	6.34e-05	0.00120432	0.00101206	0.00027637	0.000966806	0.000731415	0.000306799	7.49e-05	0.000133298	0	0	0	0	0	0
ZOTU824	0	0	0.000240584	0	0	0	0	0	0	0	0	0	0	0	0	0	0	0	0	0	0	0	0	0	0	0	0	0	0	0	0	0	0	0	0	0	0	0	0	0	0	0	0	0	0	0	0	0	0
ZOTU2075	0	0	0	0	0	0	0	0	0	0	0	0	0	0	0	0	0	0	0	0	0	0	0	0	0	0	0	0	0	0	0	0	0	0	0	0	0	0	0	0	0	0	0	1.51e-05	0.0110217	0	0	0.00295456	0
ZOTU1360	0	0.00265696	0	0	0	0	0	0	0	0	0	0	0	0	0	0	0	0	0.000109895	0	0.00807498	0	0	0	0	0	0	0	0	0	0	0	0	0	0	0	0	0	0	0	0	0	0	0	0	0	0	0.00178008	0
ZOTU5281	0	0	0	0	0	0	0	0.000983861	0.00220654	0	0	0	0	0	0	0	0	0	0	0	0	0	0	0	0	0	0	0	1.68e-05	0.000360946	4.67e-05	0.000641437	0	0	0	9.87e-05	0	0.00106863	0.000598499	0.00128552	8.18e-05	0.000149886	0.00335149	0.00122551	0	0	0	0.000293621	0
ZOTU1403	0	0	0	0	0	0	0	0	0	0	0	0	0	0	0	0	0	0	0	0	0	0	0	0	0	0	0	0	0	0	0	0	0	0	0	0	0	0	0	0	0	0	0	0	0	0.0065048	0	0	0
ZOTU1126	1.33e-05	6.28e-05	0	0	0.000350653	0.00182451	0.000699056	0.00046604	0.000190219	4.92e-05	0	0	0	0	0	0	6.77e-05	0.000446659	0	0	0	0	0	0	0	0	0	7.64e-05	0.000252381	0.000306804	0.000793188	0.000911515	1.98e-05	0	0.000253684	0.000256658	0.00232558	0.000736988	0	0.000155149	4.09e-05	0	0	0	0	0	0	0	0
ZOTU801	0.0340161	0.223373	0.00232564	0.000912855	0.000621613	0.0161003	0.0467275	0.167101	0.167031	0.162862	0.0851097	0.12277	0.101152	4.28e-05	0.172729	0.0571372	0.00199804	0.242914	0.538199	0.491173	0.32605	0.0217772	0.00428707	0.000128008	3.36e-05	0	4.03e-05	0.000745043	0.00169936	0.0280094	0.0429721	0.137943	0.000158388	0.000989737	0.00769507	0.174093	0.0318475	0.0575403	0.130496	0.175695	0.24235	0.29164	0.168127	0.064029	0.000870595	2.38e-05	0	0.0395104	0
ZOTU43	0	0	0	0	1.59e-05	0	0	0	0	0.046628	0.00648561	0.0317254	0.0446944	0.0914963	0	0.0739598	0	0	2.2e-05	0	0	0	0	0	0	0	0	0	0	0	0	0	0	2.15e-05	0	0	0	1.84e-05	0	0	0	0	0	0	0	0	0	0	0
ZOTU3810	2.66e-05	0.00736417	0.00136331	0.000342321	1.59e-05	0	0	0	0	0.0488585	0.0115455	0.0389127	0.0302602	0	0	0	0	1.72e-05	0.0339575	0.00112208	0.0155653	0.001399	0.000327257	9.14e-05	0.00100752	0	0	0	0	0	0	0	0	0	0	0	0	0	0	0	0	0	0	0	0	0	0	0	0
ZOTU4622	0	0	0	0	0	1.39e-05	0	0.000138086	0.000361416	0	0	0	0	0	0	0	0	0	0	0	0	0	0	0	0	0	0	0	0	3.61e-05	0	0.000135039	0	0	0	0.000138201	0	0	0	4.43e-05	0	0.0113351	0.0421792	0.000272335	0.0340228	0.00033358	0	0.0215628	0.00433339
ZOTU1746	0.000146506	0.0226783	0.000160389	0	0	0	0	0	1.9e-05	0.0309322	0.00963057	0.0303323	0.0545491	0	0.083537	0.136373	0	0	0	0	0	0	0	1.83e-05	0	0	0	0	0	0	0	0	0	0	0	0	0	0	0	0	0	0	0	0	0	0	0	0	0
ZOTU549	0.00105218	0.000523023	0	0	0	0	0	0	0	0.0318999	0.05496	0.00907119	0.0208095	0	0	0.220983	0	0	0	0	0	0.000505663	0.00011454	0	0	0	0	0	0	0	0	0	0	0	0	0	0	0	0	2.22e-05	0	0	0	0	0	0	0	0	0
ZOTU7245	0.00764498	0.00253143	2.67e-05	0	0.0106631	0.0101393	0.00515554	0.00252007	0.000722832	0.00460867	0.00431908	0	0	0	0	0	0.016306	0.00840062	0.00169238	0	0	0.00156756	0.000179991	0	0	0	0	0.00527261	0.0125181	0.0099621	0.00692873	0.00283583	0.00617712	0.0116832	0.0110352	0.0040473	0.00204565	0.000350069	4.6e-05	0.000354626	0.000163626	0.000562071	0	0	0	0	0	0	0
ZOTU4881	0.019845	0.00257328	0	0.00083135	0.000414409	0.000194986	2.18e-05	1.73e-05	3.8e-05	0.00861051	0.00622004	0.00674403	0.0142097	0	0	0	0.00956687	0.0024738	0	0	0	0.000134844	0.000163629	0	0	0	0	0.000802354	0.000790793	0.00104674	9.33e-05	3.38e-05	0.00247481	0.000279708	0.00247342	3.95e-05	0.000322997	0	0	0	0	0	0	0	0	0	0	0	0
ZOTU1806	0	0	0	0	0	0	0	0	0	0.00788887	0.00173322	0.0036728	0	0.0635213	0	0	0	0	0	0	0	0	0	0	0	0	0	0	0	0	0	0	0	0	0	0	0	0	0	0	0	0	0	0	0	0	0	0	0
ZOTU141	0.00538078	0.000627628	0.000160389	0	1.59e-05	0	0	0	0	0.00961097	0.00677914	0.00891288	0.0174871	0	0.00258807	0	0.0150699	0.00292046	4.4e-05	0	0	1.69e-05	1.64e-05	0	0	0	0	0	0	0	0	0	0	2.15e-05	0	0	0	0	0	0	0	0	0	0	0	0	0	0	0
ZOTU224	0.000785808	0.000334735	0	0	0	0	0	0	0	9.84e-05	1.4e-05	0	0	0	0	0	0.0412137	0.00666552	0	0	0	1.69e-05	1.64e-05	0	0	0	0	0	0	0	0	0	0	0	0	0	0	0	0	0	0	0	0	0	0	0	0	0	0
ZOTU2678	0	0	0	0	0	0	0	0	0	0.00477268	0.00459863	0	0	0.0382839	0	0	0	0	0	0	0	0	0	0	0	0	0	0	0	0	0	0	0	0	0	0	0	0	0	0	0	0	0	0	0	0	0	0	0
ZOTU4047	0.0017714	0.00328459	0	0	0.000334715	0.00211699	0.00325498	0.00138086	0.00140762	0	0	0	0	0	0	0	0	0.0020615	0.00287925	0.00113628	0.000347114	0	0	0	0	0	0	0.000171933	0.000706666	0.00128136	0.00282282	0.00108032	0	0.00043032	0.000295964	0.000888433	0.00482343	0.00215569	0.000897749	0.000908728	0.000184079	0.000711957	0.000361808	4.54e-05	0	0	0	0	0
ZOTU1423	0.00163821	0.000753154	0	0	0.00143449	0.000501393	2.18e-05	5.18e-05	0.000247285	0.000459227	0.000796724	0	0	0	0	0	0.00631582	0.00116818	2.2e-05	0	0	3.37e-05	0	0	0	0	0	0.00194857	0.00144698	0.00137159	0.000139974	0.000303838	0.00586034	0.00578781	0.0029385	0.000256658	0	0.000221096	2.3e-05	0	0	0	0	0	0	0	0	0	0
ZOTU472	0.00010655	0.00311722	0	0	0	0	0	0	0	0	0	0	0	0	0	0	0	0	0.00760473	0.00186066	0.0131355	0	0	0	0	0	0	0	0	0	0	0	0	0	0	0	0	0	0	0	0	0	0	0	0	0	0	0	0
ZOTU5156	7.99e-05	0.000125526	0	0	0.00141855	0.00218663	0.00133258	0.000396997	0.000152175	0.000213213	0	0	0	0	0	0	0.000169325	0.000824601	4.4e-05	0	0	0	0	0	0	0	0	0.000649524	0.00114413	0.00135355	0.00100315	0.000979035	0.000494961	0.00355014	0.00342473	0.00163867	0.00292851	0.000442193	0	0	0	0	0	0.000151297	0	0	0	0	0
ZOTU7236	0.000119869	0.000251051	0	0	0.00172139	0.000710306	0.000218455	0	0	0	0	0	0.00599367	0	0	0	0.00228589	0.000395121	0	0	0	6.74e-05	1.64e-05	0	0	0	0	0.00250258	0.0033819	0.00214763	0.000676543	0.000371358	0.0025342	0	0.000528508	9.87e-05	0	0	0	0	0	0	0	0	0	0	0	0	0
ZOTU553	0	0	2.67e-05	0	0	0	0	0	0	0.000738044	0.0014956	0.006934	0.0129526	0	0	0	1.69e-05	1.72e-05	0	0	0	0	0	0	0	0	0	0	0	0	0	0	0	0	0	0	0	0	0	0	0	0	0	0	0	0	0	0	0
ZOTU887	2.66e-05	6.28e-05	0	0	0.000207204	0.000431755	0.000961202	0.000155347	0.000152175	0	0	0	0	0	0	0	3.39e-05	0.000257688	4.4e-05	0	0	0	0	0	0	0	0	0.000496695	0.00111048	0.000938459	0.000793188	0.000776476	0.00106912	0.00666997	0.00340359	0.000789718	0.00165805	0.00121603	9.21e-05	0	0	0	0	0	0	0	0	0	0
ZOTU3684	5.33e-05	0	0	0	0.0100893	0.000654596	0	0	0	1.64e-05	0	0	0	0	0	0	5.08e-05	0.000188971	0	0	0	0	0	0	0	0	0	0.00296107	0.000773968	0.000631655	2.33e-05	0	0.00483082	0	0.000232543	0	0	0	0	0	0	0	0	0	0	0	0	0	0
ZOTU733	0.00229083	0.000564865	0	0	1.59e-05	0	0	0	0	0.00142688	0.000726836	0	0.0024693	0	0	0	0.00711165	0.0016492	0	0	0	3.37e-05	1.64e-05	0	0	0	0	0	0	3.61e-05	0	0	0.00213823	0.000129096	0.000824472	0	0	0	0	0	0	0	0	0	0	0	0	0	0
ZOTU7276	0.000506113	0.000209209	0	0	0.0016417	0.000473538	2.18e-05	0	0	9.84e-05	2.8e-05	0	0	0	0	0	0.00104981	0.000721526	0	0	0	3.37e-05	4.91e-05	0	0	0	0	0.00361059	0.00237238	0.00147988	0	0	0.00540498	0.000494868	0.000845612	0	0	0	0	0	0	0	0	0	0	0	0	0	0
ZOTU8452	0.00459498	0.00190381	0	0	1.59e-05	0.000320334	0.000458756	0.00024165	3.8e-05	0.000147609	0	0	0	0	0	0	0.00602797	0.00116818	0	0	0	0.000286543	8.18e-05	0	0	0	0	0.000171933	0.00043746	0.000703844	0.000653214	0.000270079	0.00025738	4.3e-05	0.000401666	0.000296144	0	0	2.3e-05	0	0	0	0	0	0	0	0	0	0
ZOTU8988	0.0010655	0.000376577	0	0	0.00175327	0.000306407	0	0	1.9e-05	0.000295217	0.000363418	0	0	0	0	0	0.000795828	0.000738705	0	0	0	5.06e-05	1.64e-05	0	0	0	0	0.00133726	0.00158159	0.00111893	0	0	0.00538518	0.000279708	0.0013107	9.87e-05	0.00118432	0	0	0	0	0	0	0	0	0	0	0	0
ZOTU1268	0.000173144	4.18e-05	0	0	0.00243864	0.000612813	4.37e-05	0	0	9.84e-05	5.59e-05	0	0	0	0	0	0.000355583	0.000274867	0	0	0	0	0	0	0	0	0	0.0036297	0.00284349	0.00180473	0	0	0.00500901	4.3e-05	0.000507367	0	0	0	0	0	0	0	0	0	0	0	0	0	0
ZOTU9445	4e-05	4.18e-05	0	0	1.59e-05	2.79e-05	0	0	0	0.00205012	0.00109025	0.00202637	0.0122343	0	0	0	1.69e-05	1.72e-05	0.000109895	0	0	0	0	0	0	0	0	0	3.37e-05	5.41e-05	2.33e-05	0	1.98e-05	0	2.11e-05	0	0	0	0	0	0	0	0	0	0	0	0	0	0
ZOTU548	0.0109613	0.00112973	0.000187121	0.000293418	0	0	0	0	0	0.000114807	0	0	0	0	0	0	0.00320024	0.000893317	0	0	0	0	0	0	0.000470177	0	0	0	0	0	0	0	0	0	0	0	0	0	0	0	0	0	0	0	0	0	0	0	0
ZOTU7332	0	4.18e-05	0	0	0.000286898	0.00185237	0.00203163	0.00224389	0.000152175	0	0	0	0	0	0	0	1.69e-05	0.000687167	0.000153853	0	0	0	0	0	0	0	0	0.000401177	0.00136286	0.000830175	0.00123644	0.000843996	0.000415767	0.00329195	0.000486227	0.00053306	0	0	2.3e-05	0	0	0	0	0	0	0	0	0	0
ZOTU10356	5.33e-05	0.000188288	0	0	0.00183296	0.00188022	0.00242485	0.00070769	0.000380438	0	0	0	0	0	0	0	1.69e-05	0.00061845	0.000285727	0	0	3.37e-05	0	0	0	0	0	0.000534902	0.00111048	0.00142574	0.00137641	0.000911515	5.94e-05	0	0.000443946	0.000375116	0.000172265	5.53e-05	4.6e-05	0	0	0.000112414	0	0	0	0	0	0	0
ZOTU647	0.000133188	2.09e-05	0	0	0.00261396	0.000389972	0	0	1.9e-05	0.000131208	0	0	0	0	0	0	0.000101595	0.0004123	0	0	0	3.37e-05	3.27e-05	0	0	0	0	0.00326672	0.00240603	0.00203934	0	0	0.00310836	0	0.000190263	0	0	0	0	0	0	0	0	0	0	0	0	0	0
ZOTU4621	0.00214432	0.000585786	0	0	3.19e-05	0	0	0	0	0.000656039	9.78e-05	0	0.0106629	0	0	0	0.000152393	3.44e-05	0	0	0	3.37e-05	9.82e-05	0	0	0	0	0	0	0	0	0	0	0	0	0	0	0	0	0	0	0	0	0	0	0	0	0	0
ZOTU4804	2.66e-05	0	0	0	0.00027096	0.000696379	0.000611674	0.000776733	0.00039946	1.64e-05	0	0	0	0	0	0	5.08e-05	0.000463838	8.79e-05	0	0	0	0	0	0	0	0	7.64e-05	0.000353333	0.000162426	0.00121311	0.000708956	7.92e-05	0.000580933	0.000887893	0.000888433	0.00170112	0.00243206	0.000552461	0.00048761	0.000224986	0.000243564	3.81e-05	0.000151297	0	0	0	0	0
ZOTU1908	0.00010655	0.000104605	0	0	0.00194453	0.000417827	4.37e-05	6.9e-05	0	0.000278817	0.000153754	0	0.00343458	0	0	0	0.000152393	0.000223329	0	0	0	0	1.64e-05	0	0	0	0	0.00141367	0.0021873	0.00149792	0.000349936	0.000270079	0.000752341	0	8.46e-05	0	0	0	0	0	0	0	0	0	0	0	0	0	0
ZOTU4909	9.32e-05	6.28e-05	0	0	0.00137074	0.000264624	0	0	0	0.000196812	8.39e-05	0	0	0	0	0	0.000253988	0.000257688	0	0	0	1.69e-05	0	0	0	0	0	0.00317121	0.000588889	0.000649702	0	6.75e-05	0.00566236	0	0	0	0	0	2.3e-05	0	0	0	0	0	0	0	0	0	0
ZOTU1715	5.33e-05	0.000292893	0.000106926	0	0.000557858	0.00111421	0.000677211	0.000500561	0.000380438	1.64e-05	0.00034944	0	0	0	0	0	6.77e-05	0.000360763	0.000483538	0	0	0	0	0	0	0	0	0.000248348	0.000740317	0.00086627	0.00100315	0.000607677	5.94e-05	0.000559416	0.000169122	0.000710746	0.00081826	0.000442193	0.000230192	0.00048761	0.000306799	0.000168621	0	0	0	0	0	0	0
ZOTU865	0.00263712	0.00108789	0	0	6.38e-05	0.000306407	0.000131073	6.9e-05	0	0.00016401	0.000391373	0	0	0	0	0	0.00380981	0.000944855	0	0	0	0.00018541	8.18e-05	0.000128008	0	0	0	0.000171933	0.000454285	0.000541419	0.000186632	6.75e-05	9.9e-05	0.000150612	0.000126842	0.000138201	0	0	0	0	0	0	0	0	0	0	0	0	0
ZOTU4424	6.66e-05	0.000251051	0	0	0.000589735	0.00108635	0.00152919	0.000966601	0.00039946	0	0	0	0	0	0	0	1.69e-05	0.000274867	0.000175832	0	0	0	0	0	0	0	0	0.000152829	0.000555238	0.000812128	0.0012831	0.00104656	9.9e-05	0	0.000528508	0.000947661	0.000236865	0.000479042	0.000230192	0	0	0	0	0	0	0	0	0	0
ZOTU1623	0	0	0	0	0	0	0	0	0	0	0	0	0	0	0	0	0	0	0	0	0	0	0	0	0	0.00701358	0.00435624	0	0	0	0	0	0	0	0	0	0	0	0	0	0	0	0	0	0	0	0	0	0
ZOTU7342	0.00395567	0.00110881	0.000106926	0.000945457	6.38e-05	0	0	0	0	3.28e-05	0	0	0	0	0	0	0.00201497	0.000377942	0	0	0	0.000337109	0.000196354	0	0	0	0.00201678	3.82e-05	5.05e-05	3.61e-05	0	0	1.98e-05	0	0	0	0	0	0	0	0	0	0	0	0	0	0	0	0
ZOTU4613	0.000799126	0.000209209	0	0	0.000143449	1.39e-05	0	0	0	0.000278817	0.000125798	0	0	0	0	0	0.00243828	0.00084178	0	0	0	8.43e-05	3.27e-05	0	0	0	0	0.000439384	0.000286032	0.000270709	0	0	0.00239561	0.000473352	0.00133184	3.95e-05	0.000322997	0.000110548	0	0	0	0	0	0	0	0	0	0	0
ZOTU11671	5.33e-05	2.09e-05	0	0	0.00125917	0.00231198	8.74e-05	0.000293432	1.9e-05	0	0	0	0	0	0	0	1.69e-05	0.000188971	0	0	0	0	0	0	0	0	0	0.000439384	0.00265841	0.00120917	0.000443252	0.000371358	7.92e-05	0	0.000634209	0	0.000322997	5.53e-05	0	0	0	0	0	0	0	0	0	0	0
ZOTU4849	0.000932314	0.000334735	5.35e-05	0	0.000191266	1.39e-05	0	0	0	0.000524831	0.00183107	0.0020897	0	0	0	0	0.00199804	0.000429479	0	0	0	6.74e-05	4.91e-05	0	0	0	0	0.000248348	5.05e-05	0.000216567	0	0	0.00118791	0	0	0	0	0	0	0	0	0	0	0	0	0	0	0	0
ZOTU1891	0	0	0	0	0	0	0	0	0	0	0	0	0	0	0	0	0	0	0	0	0	0	0	0	0	0.00455028	0.00552598	0	0	0	0	0	0	0	0	0	0	0	0	0	0	0	0	0	0	0	0	0	0
ZOTU13910	0	8.37e-05	0	0	6.38e-05	0.00132312	0.00373558	0.00172607	0.000722832	0	0	0	0	0	0	0	0	0.000137433	0.000307706	0	0	0	0	0	0	0	0	3.82e-05	0.000134603	0.000234615	0.00116645	0.000776476	1.98e-05	0.000129096	0.000380526	0.000434345	0.00251938	0.00154767	9.21e-05	0	0	0	0	0	0	0	0	0	0
ZOTU11538	0	0.000167368	0	0	7.97e-05	0.00107242	0.00211901	0.000914818	0.000532613	0	0	0	0	0	0	0	0	0.000481017	6.59e-05	0	0	0	0	0	0	0	0	1.91e-05	0.000235555	0.000234615	0.000956491	0.000810236	0	0	0.000169122	0.000375116	0.00105513	0.000608015	0	0	0	0	0	0	0	0	0	0	0
ZOTU1137	0.00271703	0.0365907	0.000614825	0.00207023	0	0	0	0	0	0.00109887	5.59e-05	0	0	0	0	0	5.08e-05	0.00814293	0.0430568	0.0553512	0.0917661	1.69e-05	0	0	0	0	0	0	0	0	0	0	0	0	0	0	0	0	0	0	0	0	0	0	0	0	0	0	0
ZOTU12179	1.33e-05	0	0	0	0	0	0	0	0	0.00123007	0.0115175	0.00641158	0.00314275	0	0	0	0	0	0	0	0	0	0	0	0	0	0	0	0	0	0	0	0	0	0	0	0	0	0	0	0	0	0	0	0	0	0	0	0
ZOTU1454	0	0.000502103	0.00689674	0.00268966	0	0	0	0	0	0	0	0	0	0	0	0	0	0	0	0	0	0.00868056	0.00196354	0.000109721	0.000335841	0	0	0	0	0	0	0	0	0	0	0	0	0	0	0	0	0	0	0	0	0	0	0	0
ZOTU3420	0.00138515	0.00225946	0	0	0.00478164	0.0140669	0.00183502	0.0132908	0.0193643	0.00213213	0.000852634	0	0	0	0	0	0.000761963	0.0152379	0.00503319	0	0	6.74e-05	0	0	0	0	0	0.00135636	0.00388666	0.0026349	0.00461915	0.0119847	0.000970124	0.000925189	0.00811788	0.0260015	0.0146426	0.0184431	0.0686893	0.040383	0.0218441	0.0228014	0.0115398	0.00508359	6.96e-05	0	0	0.000403729	0
ZOTU3392	0.00286354	0.00271972	0	0	0.00251833	0.00300836	0.00548322	0.00177785	0.000894029	0.000902053	0.000335463	0	0	0.022072	0	0	0.00110061	0.00609861	0.00327487	2.84e-05	0	0.000488808	9.82e-05	1.83e-05	0	0	0	0.000496695	0.00183397	0.00196715	0.00403593	0.00300462	0.000316775	0.00346408	0.00312877	0.00369193	0.00577089	0.00184247	0.000207173	0.000265969	2.05e-05	0	0	0	0	0	0	9.18e-05	0
ZOTU192	0.000372926	0.000983284	0	0	0.000541919	0.00172702	0.00122335	0.00274445	0.00254893	0.000229614	0.000195687	0	0	0	0	0	0.000169325	0.00350455	0.000923117	0	0	1.69e-05	1.64e-05	0	0	0	0	9.55e-05	0.000471111	0.000487277	0.000583226	0.00138415	9.9e-05	0.000172128	0.000972454	0.00296144	0.00490956	0.00617227	0.0102205	0.00709251	0.00509286	0.00423427	0.0010283	0.000453892	0	0	0	0	0
ZOTU11235	0.000918995	0.00257328	0	0	0.00218361	0.00399721	0.00574537	0.00265815	0.00070381	0.00016401	0	0	0	0	0	0	0.000965153	0.00530837	0.012528	0.00313898	5.48e-05	0.000657362	4.91e-05	0	0	0	0	0.000171933	0.000269206	0.000938459	0.00275283	0.00297087	3.96e-05	0.000516384	0.001205	0.00130303	0.00167959	0.00112391	0.000253211	0.000354626	6.14e-05	0	0	0	0	0	0	0	0
ZOTU2106	0.00054607	0.00115065	0	0	0.00039847	0.00104457	0.00351713	0.00139812	0.000665766	0.000196812	6.99e-05	0	0	0.000299427	0	0	0.000152393	0.00199278	0.0042859	0	0	0.000421386	3.27e-05	0	0	0	0	0.00021014	0.00043746	0.000631655	0.00240289	0.00158671	7.92e-05	0.00296921	0.00112044	0.0019743	0.00958226	0.00593275	0.000483403	0.000398954	0.000102266	1.87e-05	0	0	0	0	0	0	0
ZOTU3496	2.66e-05	0.000125526	2.67e-05	0	6.38e-05	0.000236769	0.000131073	0.00224389	0.00235871	0	0	0	0	0	0	0	0	6.87e-05	0.000351664	0	0	0	0	0	0	0	0	0.00021014	0.00021873	0.00131745	0.00123644	0.00219439	0	0	0.000486227	0.00493574	0.00088286	0.00644864	0.00414346	0.00312514	0.00175898	0.000749429	0.00129489	0.00373705	0	0	0	0.00124789	0
ZOTU9998	0.000492795	0.000543944	2.67e-05	0	0.000302837	0.00125348	0.000589829	0.000828515	0.000722832	0.000393623	0.000503194	0.00118733	0	0	0	0	0.000118528	0.00326404	0.00243967	0	0	0	0	0	0	0	0	3.82e-05	5.05e-05	0.000306804	0.000606555	0.00111407	7.92e-05	0.0010758	0.00103587	0.00175712	0.00497416	0.00490097	0.00161134	0.000820072	0.000449971	5.62e-05	1.9e-05	0.000136168	0	0	0	1.84e-05	0
ZOTU14167	0.00471484	0.00299169	2.67e-05	0	0.000111572	0.000598886	0.000480601	0.000655907	0.000190219	0.000377222	0.000307507	3.17e-05	0	0	0	0	0.00181178	0.00310943	0.00362653	0.00024146	0	0.000589941	8.18e-05	0	0	0	0	1.91e-05	0.00043746	0.000270709	0.000303278	0.000337598	0	0.000494868	0.000317105	0.000592288	8.61e-05	7.37e-05	4.6e-05	0	2.05e-05	0	0	0	0	0	0	0	0
ZOTU443	0.000412882	0.00246867	0	0	0	0	0	0	0	0.000196812	6.99e-05	0	0	0	0	0	0	0.000137433	0.0035606	0.0136354	0.00065769	1.69e-05	1.64e-05	0	0	0	0	0	0	0	0	0	0	0	0	0	0	0	0	0	0	0	0	0	0	0	0	0	0
ZOTU3130	0.00101223	0.00156907	0	0	7.97e-05	0.00091922	0.00128889	0.00103564	0.000475547	0.00016401	0.000139776	0	0	0	0	0	0.000169325	0.00317815	0.00351664	0.000269867	0	0.00150014	0.00011454	0	0	0	0	0.000114622	0.000201905	0.000306804	0.000396594	0.000573917	1.98e-05	0.000129096	0.000380526	0.000809461	0.00127046	0.000773837	9.21e-05	6.65e-05	2.05e-05	1.87e-05	3.81e-05	0	0	0	0	0	0
ZOTU1231	6.66e-05	4.18e-05	0	0	0.000111572	0.000626741	0.000283992	0.000276172	0.000285328	3.28e-05	0	0	0	0	0	0	1.69e-05	0.00084178	0.000131874	0	0	0	0	0	0	0	0	3.82e-05	0.000252381	0.000378993	0.00130643	0.000776476	1.98e-05	0.000796093	0.000930174	0.00116483	0.00267011	0.00451405	0.000115096	6.65e-05	2.05e-05	0	0	0.000257206	0	0	0	0	0
ZOTU1584	7.99e-05	0.000125526	0	0	4.78e-05	0.000167131	0.000174764	0.00070769	0.000684788	1.64e-05	0.000153754	0	0	0	0	0	0	0.0004123	0.000153853	0	0	0	0	0	0	0	0	0	1.68e-05	5.41e-05	0.000139974	0.000472638	1.98e-05	0	0.000147982	0.00122406	0	0.000442193	0.00352194	0.00334678	0.00155445	0.0005246	0.000437978	0.000302595	0	0	0	0	0
ZOTU11256	0.000239738	0.000104605	0	0	0	4.18e-05	0.000152919	0.000120825	0	0.000328019	0	0.00272294	0	0	0	0	3.39e-05	0.000652809	0.00142863	0.0056388	0.000109615	0	3.27e-05	1.83e-05	0	0	0	0	0	0	7e-05	6.75e-05	0	0	4.23e-05	7.9e-05	0	0	0	6.65e-05	0	0	0	0	0	0	0	0	0
ZOTU13385	0.000293013	0.00303354	0	0	0	0	0	0	0	0	0	0	0	0	0	0	3.39e-05	0.0004123	0.00112093	0	0	0.00589941	0.00112904	0	0	0	0	0	0	0	0	0	0	0	0	0	0	0	0	0	0	0	0	0	0	0	0	0	0
ZOTU1019	0.00103886	0.00200841	0	0	0	0	0	0	0	0	0	0	0	0	0	0	0	0.000154613	0.00490131	0.000781195	9.13e-05	0.00151699	0.000556337	0	0	0	0	0	0	0	0	0	0	0	0	0	0	0	0	0	0	0	0	0	0	0	0	0	0
ZOTU4792	0.0039024	0.00470721	5.35e-05	0	0	0	0	0	0	1.64e-05	0	0	0	0	0	0	1.69e-05	1.72e-05	4.4e-05	0	0	0.000488808	0.000278169	0	0	0	0	0	0	0	0	0	0	0	0	0	0	0	0	0	0	0	0	0	0	0	0	0	0
ZOTU4312	0.00257052	0.0010042	0	0	0.000446286	0.000125348	0.000152919	0.000120825	0	0.000557633	5.59e-05	0	0	0	0	0	0.0020827	0.000154613	0	0	0	0.000589941	9.82e-05	0.000274303	0	0	0	0.000152829	0.000286032	0.000126331	0.000139974	6.75e-05	0.000158388	8.61e-05	0.000190263	0	0	0	0	0	0	0	0	0	0	0	0	0	0
ZOTU4941	0.000226419	0.000125526	0	0	0.00197641	0.000529248	0.00131073	0.000258911	0	0	0	0	0	0	0	0	0.000186258	1.72e-05	0	0	0	1.69e-05	0	0	0	0	0	0.00057311	0.00124508	0.000956506	0.000303278	3.38e-05	0.000574155	0.000473352	0.000274824	3.95e-05	0	0	6.91e-05	4.43e-05	0	0	0	0	0	0	0	0	0
ZOTU7412	1.33e-05	6.28e-05	0	0	0	5.57e-05	6.55e-05	0.000103564	0.000171197	0	0	0	0	0	0	0	0	0	0	1.42e-05	0	0	1.64e-05	0	0	0	0	0	0	9.02e-05	9.33e-05	0.000506397	0	0	0	0.000197429	4.31e-05	0.000423768	0.00142719	0.0023494	0.000838583	0.000168621	0.00015234	0.00136168	0	0	0	0.000293621	0
ZOTU1828	4e-05	6.28e-05	0	0	0.000191266	0.000571031	4.37e-05	6.9e-05	1.9e-05	1.64e-05	0	0	0	0	0	0	1.69e-05	8.59e-05	0.000131874	0	0	0	0	0	0	0	0	3.82e-05	1.68e-05	3.61e-05	7e-05	0.000337598	1.98e-05	0.000408804	0.000613069	0.000434345	0.00465116	0.000442193	0	0	0	0	0	0	0	0	0	0	0
ZOTU3140	5.33e-05	0.000627628	0	0	0.000159388	0.000905292	0.000502447	0.000293432	0.000171197	1.64e-05	0	0	0	0	0	0	1.69e-05	0.000549734	0.00109895	0	0	5.06e-05	0	0	0	0	0	1.91e-05	0.000100952	0.00019852	0.00025662	0.000236319	3.96e-05	0	0.000190263	0.000236915	0.000925926	0.000644864	0.000506422	0.000177313	8.18e-05	1.87e-05	0	6.05e-05	0	0	0	3.67e-05	0
ZOTU4052	0	0.000815917	0.000240584	6.52e-05	0	0	0	0	0	0.000934855	0.000167731	0.00356199	0	0	0	0	0	0	4.4e-05	0	0	0.00207322	0.000147266	0	0	0	0	0	0	0	0	0	0	0	0	0	0	0	0	0	0	0	0	0	0	0	0	0	0
ZOTU3402	0	2.09e-05	0	0	1.59e-05	9.75e-05	4.37e-05	0.00046604	0.000285328	0	0	0	0	0	0	0	0	8.59e-05	6.59e-05	0	0	0	0	0	0	0	0	1.91e-05	0.000134603	0.000144378	0.00025662	0.000641437	3.96e-05	0.00010758	0.00105701	0.00179661	0.00150732	0.00106863	9.21e-05	4.43e-05	0	0	0	0	0	0	0	0	0
ZOTU1620	0	0	0	0	0.000302837	0.000612813	0.000218455	0.000500561	9.51e-05	0	0	0	0	0	0	0	0	0	0	0	0	0	0	0	0	0	0	3.82e-05	0.000117778	0.000324851	0.00142307	0.00195807	0	0	0.000528508	0.00116483	0.000150732	0.000479042	0	2.22e-05	0	0	0	0	0	0	0	0	0
ZOTU11152	7.99e-05	0.000543944	0	0	7.97e-05	0.000710306	0.000349528	0.000828515	0.000494569	1.64e-05	0	0	0	0	0	0	0	0.00061845	0.000175832	0	0	0.000101133	0	0	0	0	0	0	6.73e-05	0.000108284	0.000536568	0.000236319	1.98e-05	0	0.000105702	0.000691003	0	0.000681713	0.000437365	0.000598431	0.000122719	0.000168621	5.71e-05	1.51e-05	0	0	0	0	0
ZOTU9145	0.000133188	6.28e-05	0	0	0.000111572	0.0004039	0.000283992	0.000431518	7.61e-05	4.92e-05	0	0	0	0	0	0	1.69e-05	0.00063563	4.4e-05	0	0	0	0	0	0	0	0	3.82e-05	0.000134603	0.000433135	0.000629885	0.000776476	0	0.000236676	0.000739911	0.000473831	0.00120586	0.000626439	0.000138115	0.000155149	0	0	0	0	0	0	0	0	0
ZOTU1760	7.99e-05	0.000481182	0	0	3.19e-05	0.000487465	0.00019661	0.00046604	0.000456525	3.28e-05	0	0	0	0	0	0	5.08e-05	0.000446659	0.000241769	0	0	0	0	0	0	0	0	0	0.000117778	0	0.000186632	0.000438878	1.98e-05	0	0.000147982	0.000809461	0.000322997	0.000184247	0.0015653	0.000576267	0.000286345	0.000112414	0	9.08e-05	0	0	0	0	0
ZOTU3045	0	4.18e-05	0	0	4.78e-05	0.000807799	0.00174764	0.0004833	7.61e-05	0	0	0	0	0	0	0	1.69e-05	0.000446659	8.79e-05	0	0	0	0	0	0	0	0	0	5.05e-05	0.000306804	0.000863175	0.000675197	3.96e-05	0.000344256	0.000169122	0.000236915	0	0.000350069	9.21e-05	0.000177313	0.000184079	0	0	1.51e-05	0	0	0	0	0
ZOTU1288	0.000892358	8.37e-05	0	0	0	0	0	0	0	0.00144329	0.000922522	0.000696566	0.0018183	0	0	0	0.000152393	0.000120254	0.00021979	0	0	0.000168554	4.91e-05	0	0	0	0	0	0	0	0	0	0	0	0	0	0	0	0	0	0	0	0	0	0	0	0	0	0
ZOTU10991	0.000186463	0.000146447	0	0	0.000510041	0.000779944	0.00019661	0.000172607	0.000114131	6.56e-05	0	0	0	0	0	0	0.000152393	0.000498196	2.2e-05	0	0	0	0	0	0	0	0	0.000248348	0.000454285	0.00039704	0.000536568	0.000405118	0.000138589	0.000236676	0.000803332	7.9e-05	0	0	0	0	0	0	0	0	0	0	0	0	0
ZOTU3292	0.000186463	0.000146447	0	0	0.000255021	0.000236769	0.00019661	0.000172607	0.000190219	6.56e-05	6.99e-05	0	0	0	0	0	0.00047411	0.000652809	0.000197811	0	0	0	0	0	0	0	0	0.000191037	0.000773968	0.000487277	0.00048991	0.000337598	7.92e-05	6.45e-05	0.000359385	0.000236915	0	5.53e-05	0	0	0	0	0	0	0	0	0	0	0
ZOTU1962	2.66e-05	4.18e-05	0	0	9.56e-05	0.000682451	0.000720902	0.000517822	1.9e-05	0	0	0	0	0	0	0	3.39e-05	0.00128844	0	0	0	0	0	0	0	0	0	0	8.41e-05	0.000216567	0.00074653	0.000573917	1.98e-05	0	0.000211403	0.000355373	0	0.000128973	0	0.000110821	0	0	0	0	0	0	0	0	0
ZOTU7413	0	0	0	0	0	0	0	0	0	0	0	0	0	0	0	0	0	0	0	0	0	0.00547802	0.000212717	0	0	0	0	0	0	0	0	0	0	0	0	0	0	0	0	0	0	0	0	0	0	0	0	0	0
ZOTU8540	0	0	0	0	0	6.96e-05	0.00019661	0.000845775	0.00039946	0	0	0	0	0	0	0	0	3.44e-05	0	0	0	0	0	0	0	0	0	0	0	1.8e-05	4.67e-05	0.000438878	0	0	2.11e-05	0.000967404	0.000366064	0.000939659	4.6e-05	0.000886564	0.000245439	0	0	0.000121038	0	0	0	0	0
ZOTU2649	0.00010655	0	0	0	3.19e-05	0.000222841	0.00109227	0.000362475	1.9e-05	0	0	0	0	0	0	0	0.000101595	8.59e-05	0	0	0	1.69e-05	1.64e-05	0	0	0	0	0	0	9.02e-05	0.00114312	0.000540157	0	0.000344256	0.000232543	0.00033563	0.000301464	0.000202672	0	0	0	0	0	0	0	0	0	0	0
ZOTU2611	5.33e-05	0.000125526	0	0	0.000159388	0.000682451	0.000131073	0.000310693	0.000190219	3.28e-05	0.000195687	0	0	0	0	0	5.08e-05	0.000549734	0.000681349	0	0	0	0	0	0	0	0	1.91e-05	0.000185079	0.00019852	0.000303278	0.000135039	0	0	0.000169122	0.000256658	2.15e-05	0.000386918	2.3e-05	0.000332462	0	0	0	1.51e-05	0	0	0	0	0
ZOTU2440	7.99e-05	8.37e-05	0	0	0.000143449	0.000264624	0.000152919	0.000103564	0.000133153	0	0	0	0	0	0	0	0.00013546	0.000309225	0	0	0	0	0	0	0	0	0	7.64e-05	0.000386984	0.000144378	0.000653214	0.000236319	0.000118791	8.61e-05	0.000528508	0.000651517	0.000172265	0	4.6e-05	6.65e-05	8.18e-05	0	0	0	0	0	0	0	0
ZOTU8070	7.99e-05	0.000313814	0	0	0.00012751	0.000250696	0.000152919	0.000345214	7.61e-05	4.92e-05	0	0	0	0	0	0	1.69e-05	0.000704346	0.000153853	0	0	0.000674218	3.27e-05	0	0	0	0	1.91e-05	5.05e-05	7.22e-05	0.00025662	0.000135039	3.96e-05	0	8.46e-05	0.000414602	0	0.000147398	0.000138115	8.87e-05	2.05e-05	1.87e-05	0	0	0	0	0	0	0
ZOTU6702	0	0	0	0	0	8.36e-05	0.000218455	0.000379736	0.000266307	0	0	0	0	0	0	0	0	1.72e-05	0	0	0	0	0	0	0	0	0	0	0	0.000162426	0.000723201	0.000776476	0	0.000559416	0.000190263	0.000118458	2.15e-05	0.000792262	4.6e-05	6.65e-05	0	0	0	0	0	0	0	0	0
ZOTU4872	6.66e-05	2.09e-05	0	0	1.59e-05	6.96e-05	8.74e-05	0.000207129	0.000171197	0	0	0	0	0	0	0	3.39e-05	0.000498196	0	0	0	0	0	0	0	0	0	3.82e-05	8.41e-05	9.02e-05	0.000139974	6.75e-05	1.98e-05	0.000365772	0.000147982	0.000789718	0.000667528	0.000350069	0.000230192	6.65e-05	2.05e-05	1.87e-05	0	0	0	0	0	0	0
ZOTU4247	0.00158493	0.00125526	5.35e-05	8.15e-05	0	0	0	6.9e-05	0	0	0	0	0	0	0	0	0	0	0	0	0	0.000438242	0.000212717	0	0	0	0	0	0	0	0	0	0	0	0	0	0	0	0	4.43e-05	0	0	1.9e-05	6.05e-05	0	0	0	0	0
ZOTU14405	4e-05	2.09e-05	0	0	4.78e-05	0.000181058	0.000131073	0.000396997	1.9e-05	0	0	0	0	0	0	0	0	6.87e-05	0	0	0	0	0	0	0	0	0	1.91e-05	3.37e-05	0.000126331	0.000163303	0.000202559	0	0.000193644	0.000211403	0.000493574	0.000344531	0.000442193	0.000115096	0.000221641	4.09e-05	0	0	0	0	0	0	0	0
ZOTU11570	0	0	0	0	3.19e-05	0.000153203	0.000218455	0.000310693	9.51e-05	0	0	0	0	0	0	0	1.69e-05	3.44e-05	0	0	0	0	0	0	0	0	0	0	0	0.000126331	0.000629885	0.000270079	1.98e-05	0.00032274	0.000147982	7.9e-05	0.000236865	0.000184247	9.21e-05	0.000421118	4.09e-05	3.75e-05	0	1.51e-05	0	0	0	1.84e-05	0
ZOTU9726	1.33e-05	0	0	0	0.000143449	0.000278552	0.000349528	6.9e-05	0	4.92e-05	0	0	0	0	0	0	0	0.000103075	6.59e-05	0	0	0	0	0	0	0	0	3.82e-05	5.05e-05	0.000252662	0.000326607	0.000202559	5.94e-05	0.0005379	0.000295964	0.000197429	0	0	4.6e-05	2.22e-05	0	0	0	0	0	0	0	0	0
ZOTU3611	2.66e-05	0	0	0	3.19e-05	0.000194986	0.000131073	0.000120825	3.8e-05	1.64e-05	0	0	0	0	0	0	0	0.000223329	6.59e-05	0	0	0	0	0	0	0	0	0	0.000151428	0.000126331	0.000186632	0.000337598	0	0.00021516	0.000190263	0.000375116	8.61e-05	0.000552741	0	0	0	0	0	0	0	0	0	0	0
ZOTU4504	1.33e-05	6.28e-05	0	0	7.97e-05	0.000167131	0.000371374	0.000345214	1.9e-05	1.64e-05	0	0	0	0	0	0	0	0.000309225	0.000241769	0	0	0	0	0	0	0	0	0	1.68e-05	0	0.000163303	0.000236319	0	0.000279708	6.34e-05	0.000256658	0.000322997	0	2.3e-05	0	0	0	0	0	0	0	0	0	0
ZOTU3024	2.66e-05	0.000104605	0	0	1.59e-05	5.57e-05	0.000109228	5.18e-05	0	9.84e-05	0	0	0	0	0	0	3.39e-05	0.000687167	0.000461559	0	0	0	0	0	0	0	0	1.91e-05	0.000134603	3.61e-05	0.000116645	0.000101279	0	0	0.000147982	7.9e-05	0.000645995	0	0	2.22e-05	0	0	0	0	0	0	0	0	0
ZOTU2691	0.00141179	0.00102513	0	0	0	0	0	0	0	0	0	0	0	0	0	0	0	0	0	0	0	0.000117988	0.000179991	0	0	0	0	0	0	0	0	0	0	0	0	0	0	0	0	0	0	0	0	0	0	0	0	0	0
ZOTU3554	0	0	0	0	0	0	0	5.18e-05	0.000114131	0	0	0	0	0	0	0	0	0	2.2e-05	0	0	0	0	0	0	0	0	3.82e-05	1.68e-05	0.000126331	2.33e-05	0.000101279	5.94e-05	0.00010758	0.000359385	0.000177687	0.00122739	0.000165822	0	0	0	0	0	0	0	0	0	0	0
ZOTU11225	1.33e-05	0	0	0	7.97e-05	0.000250696	0.00019661	0.000120825	0	0	0	0	0	0	0	0	6.77e-05	0	0	0	0	0	0	0	0	0	0	0.000114622	0.000117778	0.00019852	0.000186632	0.000135039	3.96e-05	0.000387288	0.000211403	0.000217172	0	0	6.91e-05	0.000110821	0	0	0	1.51e-05	0	0	0	0	0
ZOTU8585	0	0	0	0	0	1.39e-05	0	3.45e-05	0.000171197	0	0	0	0	0	0	0	0	0	0	0	0	0.00018541	0	0	0	0	0	0	0	0	2.33e-05	3.38e-05	0	0	6.34e-05	0.000394859	0.000516796	0.00031322	0.000184154	0.000465446	2.05e-05	5.62e-05	0	4.54e-05	0	0	0	0	0
ZOTU8405	0	0	0	0	6.38e-05	6.96e-05	0.000109228	0.000120825	1.9e-05	0	0	0	0	0	0	0	0	0	0	0	0	0	0	0	0	0	0	0.00021014	0.000269206	9.02e-05	0.000186632	0.000202559	0.000138589	0.000387288	0.000359385	0.000236915	0	0	0	0	0	0	0	0	0	0	0	0	0
ZOTU4271	0.000186463	0.000125526	0	0	3.19e-05	0.000306407	0.000262146	0.000224389	3.8e-05	0	0	0	0	0	0	0	1.69e-05	0.000377942	0.00021979	0	0	0	0	0	0	0	0	0	0	3.61e-05	0.000116645	0.000135039	0	0	6.34e-05	7.9e-05	0.000215332	0	2.3e-05	0	0	0	0	0	0	0	0	0	0
ZOTU4764	1.33e-05	6.28e-05	0	0	0.00012751	5.57e-05	0.000283992	0.000103564	0	1.64e-05	0	0	0	0	0	0	1.69e-05	0.000171792	2.2e-05	0	0	0	1.64e-05	0	0	0	0	0	0.000134603	0.000216567	0.000139974	0.000135039	0	8.61e-05	6.34e-05	3.95e-05	0.000689061	0	0	0	0	0	0	0	0	0	0	0	0
ZOTU4484	0.00097227	0.000251051	0	0	4.78e-05	0	4.37e-05	5.18e-05	5.71e-05	0.000114807	0	0	0	0	0	0	0.000372515	0.000154613	6.59e-05	0	0	0	0	0	0	0	0	0	0.000151428	3.61e-05	0	0	0	0	2.11e-05	0	0	0	4.6e-05	0	0	0	0	0	0	0	0	0	0
ZOTU12603	1.33e-05	0	0	0	4.78e-05	0.000236769	0.000305837	0.000120825	7.61e-05	0	0	0	0	0	0	0	0	0.000120254	0	0	0	0	0	0	0	0	0	0	1.68e-05	1.8e-05	4.67e-05	0.000101279	1.98e-05	0	4.23e-05	0.000296144	0	0.000571165	0.000161134	6.65e-05	2.05e-05	0	0	0	0	0	0	0	0
ZOTU10830	2.66e-05	4.18e-05	0	0	1.59e-05	8.36e-05	0.000131073	0.00024165	0.000114131	1.64e-05	0	0	0	0	0	0	3.39e-05	0.000188971	4.4e-05	0	0	0	0	0	0	0	0	0	0	1.8e-05	4.67e-05	0.000135039	5.94e-05	4.3e-05	0.000211403	0.000217172	0	0	0.000230192	0.000199477	0	0	0	0	0	0	0	0	0
ZOTU12058	0	0	0	0	0.000334715	9.75e-05	0.000131073	0.000172607	0	0	0	0	0	0	0	0	0	0	0	0	0	0	0	0	0	0	0	3.82e-05	0.000100952	5.41e-05	0.000303278	0.000202559	5.94e-05	0.00010758	0.000190263	9.87e-05	2.15e-05	0.000184247	0	0	0	0	0	0	0	0	0	0	0
ZOTU5532	0	0	0	0	0	0	0	0.000207129	0.000323372	0	0	0	0	0	0	0	0	0	0	0	0	0	0	0	0	0	0	0	0	0	0	6.75e-05	0	0	2.11e-05	0.000296144	0.000107666	0.000847536	2.3e-05	4.43e-05	6.14e-05	0	0	1.51e-05	0	0	0	0	0
ZOTU10074	1.33e-05	0	0	0	3.19e-05	4.18e-05	0.000152919	1.73e-05	1.9e-05	0	0	0	0	0	0	0	0	0.000188971	0.000417601	0.000397699	3.65e-05	8.43e-05	1.64e-05	0	0	0	0	0	0	5.41e-05	7e-05	0.000135039	0	0.00010758	6.34e-05	0	0	3.68e-05	2.3e-05	0	0	0	0	0	0	0	0	0	0
ZOTU7482	1.33e-05	0	0	0	0	1.39e-05	0	3.45e-05	0.000152175	0	0	0	0	0	0	0	1.69e-05	0	0	0	0	0	0	0	0	0	0	3.82e-05	1.68e-05	1.8e-05	0.000116645	0.000202559	0	0	0.000147982	0.000631774	0.000495263	0	0	0	0	0	0	0	0	0	0	0	0
ZOTU14726	0	0.000104605	0	0	1.59e-05	2.79e-05	2.18e-05	0.000103564	5.71e-05	0	0	0	0	0	0	0	0	0	0	0	0	0	0	0	0	0	0	0	0	3.61e-05	2.33e-05	3.38e-05	0	0	0	1.97e-05	0	9.21e-05	0.000713595	0.000509774	6.14e-05	1.87e-05	0	0	0	0	0	0	0
ZOTU7814	0	4.18e-05	0	0	0.000621613	0.000208914	0	1.73e-05	0	3.28e-05	0	0	0	0	0	0	0	1.72e-05	0	0	0	0	0	0	0	0	0	0.000133726	0.000185079	0.000108284	0	3.38e-05	0.000158388	8.61e-05	0	0	0	0	0	0	0	0	0	0	0	0	0	0	0
ZOTU6063	0	0	0	0	0	1.39e-05	0	0.000120825	1.9e-05	0	0	0	0	0	0	0	0	0	0	0	0	0	0	0	0	0	0	0	0	0	0.000186632	3.38e-05	0	0	0.000211403	0.000118458	0.000129199	0.000626439	0	0.000177313	0	0	0	0	0	0	0	0	0
ZOTU9948	0.000133188	4.18e-05	0	0	1.59e-05	0	0	0	0	0.000426425	0.000237619	0	0	0	0	0	8.47e-05	3.44e-05	0	5.68e-05	0	1.69e-05	0	0	0	0	0	5.73e-05	5.05e-05	3.61e-05	0	0	0.000197985	2.15e-05	0.000190263	0	0	0	0	0	0	0	0	0	0	0	0	0	0
ZOTU14248	0	4.18e-05	0	0	3.19e-05	4.18e-05	6.55e-05	0.000207129	5.71e-05	0	0	0	0	0	0	0	0	0	0	0	0	5.06e-05	0	0	0	0	0	0	1.68e-05	1.8e-05	0.000163303	0.000168799	0	8.61e-05	0.000126842	0.000177687	0	0.00027637	0	4.43e-05	0	0	0	0	0	0	0	0	0
ZOTU3470	0.00129192	0.000271972	0	0	0	0	0	0	0	0	0	0	0	0	0	0	0	0	0	0	0	0	0	0	0	0	0	0	0	0	0	0	0	0	0	0	0	0	0	0	0	0	0	0	0	0	0	0	0
ZOTU11151	0	0	0	0	6.38e-05	0.000125348	0	0	1.9e-05	0	0	0	0	0	0	0	0	8.59e-05	0	0	0	0	0	0	0	0	0	0	0.000185079	0.000108284	9.33e-05	0.000168799	5.94e-05	0.000150612	0.000105702	0.000276401	0	3.68e-05	0	0	0	0	0	0	0	0	0	0	0
ZOTU12823	0	0	0	0	0	5.57e-05	0.000218455	0.000120825	7.61e-05	0	0	0	0	0	0	0	0	0	0	0	0	0	0	0	0	0	0	0	0	5.41e-05	9.33e-05	0.000135039	0	0	4.23e-05	0.000157944	0.000322997	5.53e-05	0	0	0	0	0	0	0	0	0	0	0
ZOTU5523	0	0	0	0	0	9.75e-05	0.000152919	5.18e-05	3.8e-05	0	0	0	0	0	0	0	0	0	0	0	0	0	0	0	0	0	0	0	0.000100952	0.000144378	0.000163303	0.000135039	0	4.3e-05	6.34e-05	0.000197429	2.15e-05	1.84e-05	0	0	0	0	0	0	0	0	0	0	0
ZOTU7093	0	0	0	0	1.59e-05	9.75e-05	4.37e-05	0.000189868	3.8e-05	0	0	0	0	0	0	0	0	1.72e-05	0	0	0	0	0	0	0	0	0	0	3.37e-05	0	4.67e-05	6.75e-05	1.98e-05	0	0.000211403	9.87e-05	0.000129199	0.000128973	0	0	0	1.87e-05	0	3.03e-05	0	0	0	0	0
ZOTU6684	0	0	0	0	0	1.39e-05	8.74e-05	6.9e-05	0	0	0	0	0	0	0	0	0	0	0	0	0	0	0	0	0	0	0	0	0	0	0	3.38e-05	0	0.000602449	2.11e-05	0	0.000279931	0	0	2.22e-05	0	0	0	0	0	0	0	0	0
ZOTU7745	0	0	0	0	1.59e-05	5.57e-05	0	0	5.71e-05	0	0	0	0	0	0	0	0	0	0	0	0	0	0	0	0	0	0	0	0	1.8e-05	0.000233291	0.000135039	1.98e-05	6.45e-05	4.23e-05	0.000177687	0.000129199	0.000147398	2.3e-05	0	0	0	0	0	0	0	0	0	0
ZOTU8580	0	0	0	0	0.00012751	0.000167131	2.18e-05	0	0	0	0	0	0	0	0	0	0	0.000137433	0	0	0	0	0	0	0	0	0	0	0.000117778	9.02e-05	0	0	0	8.61e-05	0.000253684	0	4.31e-05	0	0	0	0	0	0	0	0	0	0	0	0
ZOTU7959	0.000119869	4.18e-05	0	0	0	1.39e-05	0	0	0	3.28e-05	9.78e-05	0	0	0	0	0	0.000304785	6.87e-05	0	0	0	0	0	0	0	0	0	1.91e-05	0	0	2.33e-05	0	0	0.000172128	8.46e-05	0	0	3.68e-05	0	0	0	0	0	0	0	0	0	0	0
ZOTU8273	0	0.000146447	0	3.26e-05	0	0	0	0	0	0	0	0	0	0	0	0	0	0	0	0	0	0.000758495	0	0	0	0	0	0	0	0	0	0	0	0	0	0	0	0	0	0	0	0	0	0	0	0	0	0	0
ZOTU14126	0.00010655	0	0	0	3.19e-05	9.75e-05	6.55e-05	0	0	3.28e-05	0	0	0	0	0	0	5.08e-05	0.000257688	0	0	0	0	0	0	0	0	0	0	1.68e-05	3.61e-05	0	0	1.98e-05	0	2.11e-05	0	0.000193798	0	0	0	0	0	0	0	0	0	0	0	0
ZOTU14507	0	0	0	0	0	0	2.18e-05	1.73e-05	0	0	0	0	0	0	0	0	0	0	0	0	0	0	0	0	0	0	0	0	0	5.41e-05	9.33e-05	3.38e-05	0	6.45e-05	0.000190263	0.000177687	0	0.000257946	0	0	0	0	0	0	0	0	0	0	0
ZOTU13344	0	0	0	0	0.000239082	8.36e-05	0	0	0	0	0	0	0	0	0	0	0	5.15e-05	2.2e-05	0	0	0	0	0	0	0	0	9.55e-05	8.41e-05	0.000126331	2.33e-05	0	3.96e-05	0	8.46e-05	5.92e-05	0	0	0	0	0	0	0	0	0	0	0	0	0
ZOTU6955	0	0.000753154	0	0	0	0	0	0	0	0	0	0	0	0	0	0	0	0	8.79e-05	0	0	5.06e-05	0	0	0	0	0	0	0	0	0	0	0	0	0	0	0	0	0	0	0	0	0	0	0	0	0	0	0
ZOTU5103	0.000253057	0	0	0	0	0	0	0	0	0.000475628	0.000139776	0	0	0	0	0	0	0	0	0	0	0	0	0	0	0	0	0	0	0	0	0	0	0	0	0	0	0	0	0	0	0	0	0	0	0	0	0	0
ZOTU9474	0	0	0	0	0	0	0	0	0	0	0	0	0	0	0	0	0	0	0	0	0	0	0	0	0	0	0	0	0	0	7e-05	0	0	2.15e-05	2.11e-05	3.95e-05	2.15e-05	1.84e-05	0	0	0	0	0	0	0	0.000667159	0	0	0
ZOTU14265	0	0	0	0	0	1.39e-05	0	3.45e-05	1.9e-05	0	0	0	0	0	0	0	0	0	0	0	0	0	0	0	0	0	0	0	0	0	2.33e-05	3.38e-05	0	0.000258192	0	1.97e-05	0	0.000184247	0	6.65e-05	0	0.000149886	0	0	0	0	0	0	0
ZOTU7513	1.33e-05	0.000104605	0	0	0	0	0	0	0	0	0	0	0	0	0	0	0	3.44e-05	0.000615412	0	0	0	1.64e-05	0	0	0	0	0	0	0	0	0	0	0	0	0	0	0	0	0	0	0	0	0	0	0	0	0	0
ZOTU14662	0	0	0	0	0	4.18e-05	8.74e-05	1.73e-05	3.8e-05	0	0	0	0	0	0	0	0	5.15e-05	0	0	0	0	0	0	0	0	0	0	1.68e-05	0	0.000116645	6.75e-05	0	0	4.23e-05	3.95e-05	0	7.37e-05	0	2.22e-05	0	0	0	0.000151297	0	0	0	0	0
ZOTU9070	0	0	0	0	0	0	0	0	0	0	0	0	0	0	0	0	0	1.72e-05	0	0	0	0	0	0	0	0	0	3.82e-05	0	1.8e-05	0	0	0	0.000408804	0.000232543	3.95e-05	0	0	0	0	0	0	0	0	0	0	0	0	0
ZOTU12674	0	0	0	0	3.19e-05	1.39e-05	2.18e-05	3.45e-05	0	0	0	0	0	0	0	0	0	0	0	0	0	0.000219121	3.27e-05	0	0	0	0	0	0.000117778	0.000108284	2.33e-05	0	0	0	2.11e-05	5.92e-05	0	0	0	0	0	0	0	0	0	0	0	0	0
ZOTU14188	0	0	0	0	0	0	2.18e-05	0	1.9e-05	0	0	0	0	0	0	0	0	0	0	0	0	0.000168554	3.27e-05	0	0	0	0	0	0	0	4.67e-05	3.38e-05	0	0	0	1.97e-05	0	0	0	0.000110821	0	0.000206093	0	0	0	0	0	0	0
ZOTU10533	0	0	0	0	0.000175327	4.18e-05	0	0	0	0	0	0	0	0	0	0	0	0	0	0	0	0	0	0	0	0	0	0.000133726	0.000134603	7.22e-05	0	0	7.92e-05	0	0	0	0	0	0	0	0	0	0	0	0	0	0	0	0
ZOTU9359	1.33e-05	0	0	0	0.000159388	5.57e-05	0	0	0	0	0	0	0	0	0	0	0	0.000154613	0	0	0	0	0	0	0	0	0	1.91e-05	3.37e-05	3.61e-05	2.33e-05	3.38e-05	3.96e-05	0	4.23e-05	0	0	0	0	0	0	0	0	0	0	0	0	0	0
ZOTU11159	0	0	0	0	0	0	0	0	0	0.000328019	0.000279552	0	0	0	0	0	0	0	0	0	0	0	0	0	0	0	0	0	0	0	0	0	0	0	0	0	0	0	0	0	0	0	0	0	0	0	0	0	0
ZOTU10870	0	0	0	0	0	4.18e-05	2.18e-05	0	0	0	0	0	0	0	0	0	0	0	0	0	0	0	0	0	0	0	0	0	1.68e-05	1.8e-05	0	0	0	0	0	0	0.00047373	0	0	0	0	0	0	0	0	0	0	0	0
ZOTU14499	0	0	0	0	0	0	0	1.73e-05	0	0	0	0	0	0	0	0	0	0	0	0	0	0	0	0	0	0	0	0	0	5.41e-05	2.33e-05	6.75e-05	0	0.000365772	0	0	4.31e-05	0	0	0	0	0	0	0	0	0	0	0	0
ZOTU14562	0	0	0	0	1.59e-05	0	0	0	0	0	0	0	0	0	0	0	0	0	0	0	0	0	0	0	0	0	0	1.91e-05	6.73e-05	1.8e-05	2.33e-05	6.75e-05	0	0	0.000105702	9.87e-05	0	0.000147398	0	0	0	0	0	0	0	0	0	0	0
ZOTU12789	0	0	0	0	0	0	0	1.73e-05	5.71e-05	0	0	0	0	0	0	0	0	0	0	0	0	0	0	0	0	0	0	0	0	0	0	0.000135039	0	0	4.23e-05	7.9e-05	8.61e-05	0.000128973	0	0	0	0	0	0	0	0	0	0	0
ZOTU12386	0	4.18e-05	0	0	0	0	2.18e-05	0	0	0	0	0	0	0	0	0	0	0	0.000131874	0.00024146	0	0	0	0	0	0	0	0	0	0	0	0	0	0	6.34e-05	0	0	0	0	0	0	0	0	0	0	0	0	0	0
ZOTU14254	0	0	0	0	0	1.39e-05	0	0	9.51e-05	0	0	0	0	0	0	0	0	0	0	0	0	0	0	0	0	0	0	0	0	0	2.33e-05	0	0	0	0.000147982	3.95e-05	0.000129199	0	0	0	0	0	0	0	0	0	0	0	0
ZOTU13962	0	0	0	0	1.59e-05	1.39e-05	0	1.73e-05	1.9e-05	0	0	0	0	0	0	0	0	0	0	0	0	0	0	0	0	0	0	0	0	0	4.67e-05	0	0	0	0	0.000236915	0	0	9.21e-05	0	0	0	0	0	0	0	0	0	0
ZOTU13491	0	0	0	0	1.59e-05	0	2.18e-05	0	0	0	0	0	0	0	0	0	0	0	0	0	0	5.06e-05	0.000261806	3.66e-05	0	0	0	0	0	0	2.33e-05	0	0	0	0	0	0	0	0	0	0	0	0	0	0	0	0	0	0
ZOTU13012	0	0	0	0	0	4.18e-05	4.37e-05	8.63e-05	7.61e-05	0	0	0	0	0	0	0	0	1.72e-05	0	0	0	0	0	0	0	0	0	0	0	0	0	0	0	0	0	1.97e-05	0	0	2.3e-05	4.43e-05	0	0	0	0	0	0	0	0	0
ZOTU14407	2.66e-05	2.09e-05	0	0	0	0	0	0	0	3.28e-05	0	0	0	0	0	0	1.69e-05	3.44e-05	0.000175832	0	0	0	0	0	0	0	0	0	0	0	0	0	0	0	0	0	0	0	0	0	0	0	0	0	0	0	0	0	0
ZOTU14041	0	0	0	0	0	0	0	0	0	0	0	0	0	0	0	0	0	0	0	0	0	0	0	0	0	0	0	0	1.68e-05	0	7e-05	3.38e-05	0	0	0	0	0	0.000165822	0	0	0	0	0	0	0	0	0	0	0
ZOTU14131	0	0	0	0	0	2.79e-05	2.18e-05	0.000103564	7.61e-05	0	0	0	0	0	0	0	0	0	0	0	0	0	0	0	0	0	0	0	0	0	2.33e-05	0	0	0	0	0	0	1.84e-05	0	0	0	0	0	0	0	0	0	0	0
ZOTU13250	0	0	0	0	9.56e-05	4.18e-05	4.37e-05	0.000138086	0	0	0	0	0	0	0	0	0	0	0	0	0	0	0	0	0	0	0	3.82e-05	0.000185079	0.000144378	0.000209962	0	1.98e-05	0	6.34e-05	7.9e-05	2.15e-05	0	0	0	0	0	0	0	0	0	0	0	0
ZOTU9361	0	0	0	0	4.78e-05	0.000125348	0	0	0	0	0	0	0	0	0	0	3.39e-05	0	0	0	0	0	0	0	0	0	0	0.000133726	0.000117778	0.000162426	2.33e-05	0	7.92e-05	0	6.34e-05	0	0	0	0	0	0	0	0	0	0	0	0	0	0
ZOTU9873	0	0	0	0	0	0	0	0	0	0	0	0	0	0	0	0	0	0	0	0	0	0	0	0	0	0	0	1.91e-05	0	0	2.33e-05	0	0	0.000688513	0	0	0	0	0	0	0	0	0	0	0	0	0	0	0
ZOTU2937	0.000293013	0.000188288	0	0	0.00039847	0.000835655	0.000109228	1.73e-05	0	0.000131208	0.000153754	0	0	0	0	0	0.00047411	0.000704346	0	0	0	8.43e-05	3.27e-05	0	0	0	0	1.91e-05	1.68e-05	0	0	0	7.92e-05	0.000301224	0.000105702	3.95e-05	0	0	0	0	0	0	0	0	0	0	0.000931738	0	0
ZOTU4723	7.99e-05	6.28e-05	0	0	0.000430347	0.000779944	0.000152919	3.45e-05	1.9e-05	3.28e-05	0	0	0	0	0	0	8.47e-05	0.000343584	0	0	0	0	0	0	0	0	0	9.55e-05	0.000117778	3.61e-05	0	0	9.9e-05	0	0.000190263	5.92e-05	0	0.000110548	0	0	0	0	0	0	0	0	0	0	0
ZOTU13014	0.000199782	6.28e-05	0	0	0	0	0	0	0	3.28e-05	8.39e-05	0	0	0	0	0	6.77e-05	0	0	0	0	0.000269687	9.82e-05	0	0	0	0	0	0	0	0	0	0	0	0	0	0	0	0	0	0	0	0	0	0	0	0	0	0
ZOTU9090	0.000119869	4.18e-05	0	0	4.78e-05	0	0	0	0	0	5.59e-05	0	0	0	0	0	0.00040638	1.72e-05	0	0	0	1.69e-05	0	0	0	0	0	1.91e-05	1.68e-05	3.61e-05	0	0	1.98e-05	0	0	0	0	0	0	0	0	0	0	0	0	0	0	0	0
ZOTU3715	0	0.000313814	0	0	0	0	0	0.000690429	0.00235871	0	0	0	0	0	0	0	0	0	0	0	0	0	0	0	0	0	0	0	0	0.000216567	7e-05	0.000438878	0	0	0	0.000552803	0	0	0.00761936	0.0156479	0.0137037	0.0149886	0.0172335	0.011544	0.0345974	0.0216112	0.0216506	0.0174888	0.0535711
ZOTU1440	0	2.09e-05	0	0	0	0	0	0	0	0	0	0	0	0	0	9.95e-05	0	0	0	0	0	5.06e-05	0	0	0	0	0	1.91e-05	0	0	0	0	0	0	0	0	0	0	0	0	0	0	0	0	0	0	0.0117203	0	0
ZOTU740	0	0	0	0	0	4.18e-05	6.55e-05	0.000189868	0.000437504	1.64e-05	0	0	0	0	0	0	0	1.72e-05	0	0	0	0	0	0	0	0	0	0	1.68e-05	1.8e-05	0.000163303	6.75e-05	0	0	6.34e-05	0.000177687	0	0.000460617	0.000713595	0.000731415	0.000347705	0.0002623	0.000875957	0.00242076	0.0210858	0.020944	0.0894223	0.0251413	0.0488401
ZOTU63	0	0	0	0	0	0	0	0	0	0	0	0	0	0	0	0	0	0	0	0	0	0	0	0	0	0	0	0	0	0	0	0	0	0	0	0	0	0	0	0	0	0	0	0	0.000104471	0.0536348	0.0330767	3.67e-05	0.0211899
ZOTU9988	0	4.18e-05	0	0	0.000159388	0.00410864	0.00353897	0.00638647	0.0070381	0	0	0	0	0	0	0	0	0.000429479	0.000263748	0	0	0	0	0	0	0	0	0.000248348	0.00134603	0.0036636	0.00534235	0.00405118	5.94e-05	0.000494868	0.00112044	0.00748258	0.00488803	0.00515891	0.00474195	0.0020391	0.00208623	0.00140518	0.00123777	0.0320902	0.0206331	0.0133432	0.00495292	0.0189936	0.00290218
ZOTU4869	1.33e-05	0.000418419	0	0	6.38e-05	0.000779944	0.000502447	0.00343488	0.00939682	0	0	0	0	0	0	0	0	0	0.000241769	0	0	0	0	1.83e-05	0	0	0	1.91e-05	6.73e-05	0.000884317	0.00146973	0.00280207	3.96e-05	0	0.000147982	0.00221121	0.00144272	0.000663289	0.0113485	0.0173323	0.0162603	0.0142766	0.0198995	0.0237991	0.0223395	0.00757702	0	0.0375101	0.0035184
ZOTU1318	0	0	0	0	1.59e-05	8.36e-05	2.18e-05	0.00200224	0.00631527	0	0	0	0	0	0	0	0	0	4.4e-05	0	1.83e-05	0	0	0	0	0	0	3.82e-05	1.68e-05	0.000902364	0.000303278	0.00141791	0	0	2.11e-05	0.00270478	0	0.000571165	0.0188527	0.017155	0.012456	0.0531907	0.0297444	0.017611	0.0203893	4.77e-05	0.000196155	0.0107355	0.000278291
ZOTU98	0	0	0	0	0	0	0	0	0	0	0	0	0	0	0	0	0	0	0	0	0	0	0	0	0	0	0	0	0	0	0	0	0	0	0	0	0	0	0	0	0	0	0	0	0	0.000571851	0.0375637	0	0
ZOTU100	0	0	0	0	0	0	0	0	0	0	0	0	0	0	0	0	0	0	0	0	0	3.37e-05	0	0	0	0	0	0	0	0	0	0	0	0	0	0	0	0	0	0	0	0	0	0	0	0.000190617	0.0118674	0	0
ZOTU3472	0	0.000397498	0	0	0	0	0	1.73e-05	5.71e-05	0	2.8e-05	0	0	0	0	0	0	0	0	0	0	0	0	0	0	0	0	0	0	0	0	6.75e-05	0	0	2.11e-05	0	0	3.68e-05	2.3e-05	8.87e-05	0.000102266	1.87e-05	0.000247553	9.08e-05	0.000696476	0.0368129	0.0203266	0.00055054	0.00220645
ZOTU137	0	0	0	0	0	0	2.18e-05	0	0	0	0	0	0	0	0	0	0	0	0	0	0	0.000387675	0	0	0	0	0	0	0	0	0	0	0	0	0	0	0	0	0	0	0	0	0	0	0	0	0	1.84e-05	0
ZOTU3137	0	2.09e-05	2.67e-05	1.63e-05	0	1.39e-05	0	0.000120825	0.00070381	0	0	0	0	0	0	0	0	0	0	0	0	0	0	0	0	0	0	1.91e-05	0	0.000126331	4.67e-05	3.38e-05	0	0	0	0.000296144	0	3.68e-05	0.00188757	0.00390088	0.00167717	0.00348484	0.00350383	0.00691429	0.00165413	0.0208011	0.0200078	0.00412905	0.00204743
ZOTU2692	0	0	0	0	0	2.79e-05	0.000131073	3.45e-05	1.9e-05	0	0	0	0	0	0	0	0	0	0	0	0	0	0	0	0	0	0	0	0	0.00019852	0	3.38e-05	0	0	0	1.97e-05	0	1.84e-05	2.3e-05	0	0	0	0	0	0	0.01544	0.0146871	0	0
ZOTU2369	0	0	0	0	4.78e-05	0	0	0.000276172	0.00116034	0	0	0	0	0	0	0	0	0	0	0	0	0	0	0	0	0	0	0	0	0.000162426	0	0.000101279	0	0	0	0.000236915	0	1.84e-05	0.00865522	0.0111485	0.0140923	0.0142017	0.00809308	0.00882064	0.0560315	0.000262098	0.0056885	0.010864	0.0105751
ZOTU9351	0.00189127	0.0153141	5.35e-05	0	0.001562	0.00855153	0.0239208	0.00598947	0.00475547	0.00016401	0	0	0	0	0	0	0.000118528	0.0112008	0.00534089	0	0	0	0	0	0	0	0	0.00106981	0.00467746	0.00555856	0.0096349	0.00658317	0.000673147	0.00232373	0.00465087	0.0130501	0.00891473	0.00477199	0.00188757	0.00124119	0.000184079	0.000468393	0	0.000680838	0.000104471	2.38e-05	0	0.000146811	0.00190828
ZOTU4942	0	0	0	0	0	9.75e-05	0.000152919	0.00231294	0.00914953	0	0	0	0	0	0	0	0	0	2.2e-05	0	0	0	0	0	0	0	0	1.91e-05	0	0.00122722	0.000466581	0.00185679	0	0	2.11e-05	0.00148072	0	0.000552741	0.0111873	0.0173545	0.0115356	0.0145202	0.00550329	0.0216809	0.00485792	0	0	0.0266278	0.0121653
ZOTU2810	0	0.000271972	0.000213852	0	0	1.39e-05	0	1.73e-05	0.000247285	0	0	0	0	0	0	0	0	0	0	0	0.00802017	0.00301712	9.82e-05	0	0	0	0	0	0	9.02e-05	4.67e-05	6.75e-05	0	0	0	1.97e-05	0	0	0.000115096	0.00166231	0.00210668	7.49e-05	0.00397989	0.0022392	0.0143474	0.0219924	0.00917026	0.0113044	0.0193015
ZOTU4987	0	0	0	0	1.59e-05	5.57e-05	0	0.00177785	0.00555439	0	0	0	0	0	0	0	0	0	0	0	1.83e-05	0	0	0	0	0	0	0	3.37e-05	0.000487277	0.000139974	0.00128287	0	0	0	0.00104638	0	0.00058959	0.0156761	0.00538588	0.00396793	0.00511485	0.008055	0.0104546	0.0301574	0.0251614	0	0.00699185	9.94e-05
ZOTU7534	0	0	0	0	0	0	0	0.000293432	0.000494569	0	0	0	0	0	4.79e-05	9.95e-05	0	0	0	0	0	0	0	0	0	0	0	0	0	5.41e-05	0.000396594	0.000202559	0	0	0	5.92e-05	0.000172265	0.000405343	0.000621518	0.000842236	0.0015749	0.00245438	0.00236127	0.000211816	0.000348238	0.000976912	0.0442576	0.000458783	0
ZOTU12084	0	0.00127618	0	0	0	0.000682451	0.000786438	0.0018469	0.0039946	0	0	0	0	0	0	0	0	1.72e-05	0.00263748	0.00258504	0.00241153	0.000707929	3.27e-05	0	0	0	0	1.91e-05	0.000151428	0.00115503	0.00132976	0.00121535	1.98e-05	0	4.23e-05	0.00193481	0.000925926	0.00167665	0.00826389	0.0104615	0.00740407	0.0047214	0.00373234	0.00481126	0.015218	0.00690986	0.00978325	0.00401894	0.00389608
ZOTU4770	0	0	0	0	0	0	0	0.000138086	0.000513591	0	0	0	0	0	0	0	0	0	0	0	1.83e-05	0	0	0	0	0	0	0	0	1.8e-05	0	0	0	0	0	0.000118458	0	0	0.00103586	0.000199477	0.00499059	0.01645	0.0761511	1.51e-05	0.00774829	0	0	0.000110108	0.00516827
ZOTU3508	0	0.000355656	0	0	3.19e-05	0.000445682	0.000742747	0.00203676	0.00589679	0	0	0	0	0	0	0	0	3.44e-05	0.00021979	5.68e-05	0	0	0	0	0	0	0	1.91e-05	6.73e-05	0.00137159	0.000583226	0.00151919	0	0	4.23e-05	0.00258633	0.000366064	0.00121603	0.00936881	0.0109712	0.00989937	0.0100798	0.0202803	0.0109085	0.00428333	0.00335962	0	0.0107906	0.00172938
ZOTU1865	1.33e-05	8.37e-05	0.057152	0.0530597	0	1.39e-05	0	0	0	0	0	0	0	0	0	0	0	0	0	0	0	3.37e-05	0.000179991	0.000329164	0	0	0	0	0	0	0	0	0	0	0	0	0	0	0	0	0	0	0	0	0	0	2.45e-05	0	0
ZOTU664	0	0	0	0	0	0	0	5.18e-05	0.000133153	0	0	0	0	0	0	0	0	0	0	0	0	0	0	0	0	0	0	0	0	0	0	0	0	0	0	9.87e-05	0	0	4.6e-05	0	0.000102266	5.62e-05	0	0.0104546	0.00799206	0.00776764	2.45e-05	0.0097262	0.0048701
ZOTU366	0	0	0	0	1.59e-05	2.79e-05	0	8.63e-05	0.000266307	0	0	0	0	0	0	0	0	1.72e-05	0	0	0	0	0	0	0	0	0	0	0	7.22e-05	0	0	0	0	0	0	0	0	0.0010819	0.00170664	0.00149309	0.00623899	0.0194996	0.000892655	0.00842736	0.0124854	0.0411926	0.00069735	0.0011728
ZOTU402	0	2.09e-05	0	0	0	0	0	0	0	0	0	0	0	0	0	0	0	0	0	0	0	0	0	0	0	0	0	0	0	0	0	0	0	0	0	0	0	0	0	0	0	0	0	0	0	9.53e-05	0	0	0.0300157
ZOTU3560	0	0	0	0	3.19e-05	0.00086351	0.00238116	0.00569604	0.0106523	0	0	0	0	0	0	0	0	5.15e-05	0	0	0	0	0	0	0	0	0	0	0.000100952	0.00189496	0.00485244	0.00692077	0	4.3e-05	0.000338245	0.00552802	0.00152885	0.00554583	0.00439667	0.00208343	0.00617688	0.00582681	0.00710287	0.0121643	0.0124495	0.00104839	0	0.00823974	0.00180889
ZOTU3881	0	0	0	0	0	0	0	1.73e-05	1.9e-05	0	0	0	0	0	0	0	0	0	0	0	0	0	0	0	0	0	0	0	0	3.61e-05	0	0	0	0	0	0	0	1.84e-05	0.000529442	0.000199477	0.00470425	0.0168059	0.0144533	0.000332854	0	0.000285925	0	0.000201864	0.0667104
ZOTU1329	0	0	0	0	0	0.000125348	0.000109228	0.00545439	0.0144947	0	0	0	0	0	0	0	0	0	2.2e-05	0	0	0	0	0	0	0	0	1.91e-05	1.68e-05	0.0020213	0.0012831	0.00567165	0	0	0	0.00270478	0	0	0.0116707	0.0124562	0.00542011	0.00346611	0.00293255	0.0119374	0.00370873	7.15e-05	0	0.00921236	0.0101576
ZOTU3025	0	0.000355656	0	1.63e-05	0.000159388	0.00224234	0.0024467	0.00504013	0.00540222	1.64e-05	0	0	0	0	0	0	0	5.15e-05	0.000637391	0	0.0160403	0	4.91e-05	0	0	0	0	0.000114622	6.73e-05	0.00128136	0.00576228	0.00442254	0	0.000258192	0.000253684	0.00258633	0.00497416	0.0086596	0.00513328	0.00846669	0.00515422	0.00264174	0.00278021	0.00611241	0.00207202	2.38e-05	0	0.00368862	0.00528754
ZOTU11187	0	0.000292893	0	0	1.59e-05	9.75e-05	0.000131073	3.45e-05	0.000228263	0	0	0	0	0	0	0	0	0	0	0	0	0	0	0	0	0	0	0	3.37e-05	0.000162426	0.000139974	3.38e-05	0	0	0	0	0.000732127	0	0.000897749	0.000132985	0.000327252	0.000374714	0.00015234	0.0005598	0.000243767	0.0279254	0.000196155	0.00222051	0.0154849
ZOTU5005	0	0.000397498	0	1.63e-05	0	2.79e-05	6.55e-05	0.000327954	0.00131251	0	0	0	0	0	0	0	0	0	0	0.000809602	0.00131538	0.000117988	0	0	0	0	0	0	0	0.00019852	0.000139974	0.000236319	0	0	2.11e-05	0.000315887	0.000107666	0.000184247	0.00260117	0.000443282	0.00124765	0.00185484	0.00251361	0.0109539	0.00588522	0.0121042	0.0108866	0.00684504	0.025404
ZOTU9380	0	0	0	0	0	1.39e-05	0	0.000207129	0.000475547	0	0	0	0	0	0	0	0	0	0	0	0	0	0	0	0	0	0	0	0	7.22e-05	4.67e-05	0.000168799	0	0	0	3.95e-05	0	9.21e-05	0.00133511	0.000687087	0.00171807	0.00187357	0.00118064	0.00231485	0.00064424	0.000214444	0.000196155	0.00236732	0
ZOTU7431	4e-05	0	0	0	0.00027096	0.00296657	0.00847606	0.00621386	0.00353807	0	0	0	0	0	0	0	1.69e-05	0.000360763	8.79e-05	0	0	0	0	0	0	0	0	0.000248348	0.000975872	0.00258076	0.0061822	0.00695453	3.96e-05	0.000516384	0.00114158	0.00619928	0.0204565	0.0188116	0.00207173	0.00332461	0.00118629	0.000281036	0.000171383	0.000332854	0.00092283	0.000142963	0	0.000293621	0
ZOTU3380	0	2.09e-05	0	0	0	0	0	1.73e-05	7.61e-05	0	0	0	0	0	0	0	0	0	0	0	0	0	0	0	0	0	0	0	0	0	0	3.38e-05	0	0	0	0	0	0	0	0	6.14e-05	9.37e-05	1.9e-05	0.000817006	0.00659911	0.0311897	0.00208415	0.00337664	0.0295188
ZOTU1720	2.66e-05	0.000878679	0	0	6.38e-05	0.00203343	0.024751	0.00536808	0.00679082	0	0	0	0	0	0	0	0	0.000481017	0.000967075	0.000710177	0	0	0	0	0	0	0	0.00021014	0.000454285	0.00176863	0.00832847	0.00563789	0	0.00122641	0.000465087	0.00347476	0.0106589	0.00757255	0.00345288	0.00288133	0.0022294	0.00013115	0	0.00113473	0	0	0	0.00181678	0
ZOTU3429	0	0	0	0	0	0	0	0.000345214	0.00106523	0	0	0	0	0	0	0	0	0	0	0	0	0	0	0	0	0	0	0	0	1.8e-05	0	0	0	0	0	0.000217172	0	0	0.000230192	4.43e-05	0.000204532	0.000149886	0	0.0292004	0.0201107	0.00185852	0	0.0225721	0.00701692
ZOTU12248	0	0	0	0	0	0	0	0.000293432	0.00030435	0	0	0	0	0	0	0	0	0	0	0	0	0	0	0	0	0	0	0	0	9.02e-05	0.000163303	0.000540157	0	0	0	0.000394859	0	0.000571165	0.000368307	8.87e-05	0.000204532	0.000187357	0.000285638	0.000378243	0.00807912	0.00238271	0.0110583	0.00200029	0.021985
ZOTU3849	0	0	0	0	0	0	0	0.000362475	0.00117936	0	0	0	0	0	0	0	0	0	0	0	0	0	0	0	0	0	0	0	0	0.000144378	7e-05	0.000270079	0	0	0	0.000256658	0	5.53e-05	0.00131209	0.00121903	0.00298617	0.00129276	0.00173287	0.00499281	0.0130589	0.013915	0.00603178	0.0106254	0.00950166
ZOTU445	0	0.000125526	0	0	0	1.39e-05	0	8.63e-05	0.000380438	0	0	0	0	0	0	0	0	0	0	0	0	0	0	0	0	0	0	0	0	0.000180473	7e-05	6.75e-05	0	0	0	0.000118458	0	0	0.00101285	0.0011082	0.00355886	0.00395324	0.00967361	0.0151146	0.0116137	0.00259715	2.45e-05	0.0172135	0.0159024
ZOTU14315	0	0	0	0	3.19e-05	0.000821727	0.000480601	0.0018469	0.00325274	0	0	0	0	0	0	0	0	0	0	0	0	0	0	0	0	0	0	1.91e-05	6.73e-05	0.00110088	0.00193631	0.00178927	0	0	6.34e-05	0.00120432	0.000516796	0.00147397	0.00246305	0.0025932	0.00257711	0.00159254	0.0013901	0.00172479	0.000504945	0.0212538	0	0.000734053	0.00164987
ZOTU363	0	0	0	0	0	0	0	0	0	0	0	0	0	0	0	0	0	0	0	0	0	0	0	0	0	0	0	0	0	0	0	0	0	0	0	0	0	0	0	0	0	0	0	0	0.000626828	0	0	0.000165162	0
ZOTU951	1.33e-05	0	0	0	0	0	0	3.45e-05	9.51e-05	0	0	0	0	0	0	0	0	0	0	0	0	0.00018541	0	1.83e-05	0	0	0	0	0	0	2.33e-05	0	0	0	0	0.000118458	0	0	0	0	0	0	0	1.51e-05	0.0011666	0.044509	0.0149814	0	0
ZOTU3478	0	6.28e-05	0	0	0	0	0	0.000138086	0.00079892	0	0	0	0	0	0	0	0	0	0	0	0	0	0	0	0	0	0	0	0	3.61e-05	4.67e-05	0.000135039	0	0	0	0.000118458	2.15e-05	0	0.00639934	0.0014185	0.00488832	0.00728819	0.00698861	0.00261744	0.00259437	0.000524196	0.000882699	0.00121119	0.000278291
ZOTU3841	0	0	0	0	6.38e-05	0.000557103	0.000480601	0.00479848	0.00968214	0	0	0	0	0	0	0	0	0	0	0	0	0	0	0	0	0	0	0	3.37e-05	0.000523371	0.00314942	0.00482766	1.98e-05	0	0.000126842	0.00221121	0.00150732	0.00372179	0.000115096	0	0	0	0	0.0161132	0.00962878	0	0	0.00935917	0.000198779
ZOTU11781	0	0	0	0	3.19e-05	5.57e-05	4.37e-05	6.9e-05	9.51e-05	0	0	0	0	0	0	0	0	0	0	0	0	0	0	0	0	0	0	1.91e-05	5.05e-05	5.41e-05	2.33e-05	3.38e-05	0	0	0	3.95e-05	2.15e-05	0.000239521	0.000230192	0.000199477	0.00075677	0.000187357	0.000266596	0.000166427	0	7.15e-05	0.00205963	0	0.00166975
ZOTU11144	0	8.37e-05	0	0	4.78e-05	0.000877437	0.00155103	0.00324502	0.00648647	0	0	0	0	0	0	0	0	3.44e-05	0	0	0	0	0	0	0	0	0	5.73e-05	0.000286032	0.00106479	0.00212294	0.00192431	0	0	0.000147982	0.00195455	0.00152885	0.00176877	0.00418949	0.00356842	0.00388612	0.00327875	0.00325627	0.00627884	0.00215907	0.00245419	2.45e-05	0.00249578	0.00121255
ZOTU6801	0	0	0	0	0	5.57e-05	4.37e-05	0.00219211	0.00968214	0	0	0	0	0	0	0	0	0	0	0	0	0	0	0	0	0	0	0	0	0.000649702	0.000443252	0.00172175	1.98e-05	0	2.11e-05	0.00230992	0	0.000184247	0.00943787	0.00618378	0.00977665	0.00399071	0.00696957	0.00124064	0.00224613	0.000238271	0	0.00277105	0
ZOTU1099	0	0	0	0	0	6.96e-05	4.37e-05	0.000155347	0.000513591	0	0	0	0	0	0	0	0	0	0	0	0	1.69e-05	0	0	0	0	0	0	0	0.000126331	9.33e-05	0	0	0	0	9.87e-05	0	0.000165822	0.000207173	8.87e-05	0.000163626	0.000112414	0.000837872	0.00538619	0.00193272	0.00507518	0.00787073	0.00201864	0.00236548
ZOTU12226	0	0.000125526	0	0	4.78e-05	0.000348189	8.74e-05	0.000552343	0.00163588	0	0	0	0	0	0	0	0	0	2.2e-05	0	0	0	0	0	0	0	0	0	3.37e-05	0.000703844	0.000513239	0.00104656	0	0.000150612	8.46e-05	0.00159918	0.000387597	0.000700138	0.00460384	0.0057405	0.0053792	0.00622026	0.00729329	0.00358575	0.00282073	0.00152494	0	0.00429421	0.00190828
ZOTU11745	0	0.00104605	0	0	9.56e-05	0.00142061	0.00288361	0.00593769	0.0084267	0	0	0	0	0	0	0	0	0.000137433	0.000109895	0.000468717	0	3.37e-05	6.55e-05	0	0	0	0	3.82e-05	5.05e-05	0.00155207	0.00340604	0.00415246	1.98e-05	0	0.000169122	0.00183609	0.00577089	0.00943344	0.00209475	0.00250454	0.000797677	0.000281036	0.000304681	0.000363114	0	0	0	1.84e-05	0.000178902
ZOTU1476	1.33e-05	0	0	0	0	1.39e-05	0	0.00391818	0.00914953	0	0	0	0	0	0	0	0	0	0	0	0	0	0	0	0	0	0	0	0	0.000577513	0.00025662	0.00226191	0	0	2.11e-05	0.00159918	0	5.53e-05	0.00593895	0.00797908	0.00251575	0.000693221	0	0.0139647	0.0010273	2.38e-05	0	0.000165162	0.000417437
ZOTU4418	0	0	0	0	0	0	0	5.18e-05	0.000323372	0	0	0	0	0	0	0	0	0	0	0	0	0	0	0	0	0	0	0	0	1.8e-05	2.33e-05	6.75e-05	0	0	0	0	0	0	0.00124304	0.0029035	0.00214759	0.00805636	0.0136535	0.000741357	0.00550216	0.00100074	4.9e-05	0.00269764	0.0103763
ZOTU1333	0	0	0	0	0	0.000501393	0.000524292	0.0019332	0.00273915	0	0	0	0	0	0	0	0	0	6.59e-05	0	0	0	0	0	0	0	0	9.55e-05	1.68e-05	0.00122722	0.00109647	0.000641437	0	0	6.34e-05	0.000552803	0.00381137	0.00388761	0.0123153	0.0107718	0.00613597	0.00204219	0	0	0	0	0	1.84e-05	0
ZOTU10950	0	0.000543944	0	0	1.59e-05	0.000473538	0.000349528	0.0004833	0.00144566	0	0	0	0	0	0	0	3.39e-05	0.000171792	0.00364851	0.0120162	0.0119663	0	0	0	0	0	0	0	0.000185079	0.000649702	0.000653214	0.000371358	0	0	0.000274824	0.000256658	0.000193798	0.00031322	0.00165738	0.00334678	0.00128855	0.00228576	0.00264691	0.000196687	0	0	0	5.51e-05	0
ZOTU1689	0	0	0	0	0	0	0	0.000120825	0.000209241	0	0	0	0	0	0	0	0	0	0	0	0	0	0	0	0	0	0	0	0	1.8e-05	0	0	0	0	0	0	0	0	0.00161134	0.00075358	0.000388612	0.000281036	0.000818829	0.000650579	0.00686029	0.00016679	0	0.0069001	0.0173733
ZOTU4746	0	2.09e-05	0	0	0	1.39e-05	0	0	0	0	0	0	0	0	0	0	0	0	0	0	0	0	0	3.66e-05	0	0	0	0	0	1.8e-05	7e-05	0	0	0	0	0	0	1.84e-05	4.6e-05	0	0	0	0	1.51e-05	0.000626828	0.0215159	7.36e-05	0.000183513	0.00820959
ZOTU6991	0	0	0	0	0	0	2.18e-05	0.00024165	0.00102718	0	0	0	0	0	0	0	0	0	0	0	0	0	0	0	0	0	0	0	1.68e-05	0.000415088	7e-05	0.000303838	0	0	0	0.000217172	0	0	0.00402836	0.000132985	0.00259756	0.00264174	0.00771223	0.00136168	0.0138773	0	0	0.00682669	0.000596338
ZOTU9552	0	0	0	0	0	2.79e-05	2.18e-05	1.73e-05	0	0	0	0	0	0	0	0	0	0	0	0	0	0	0	0	0	0	0	0	0	0	0	0	0	0	0	0	0	0.000110548	4.6e-05	0.000110821	2.05e-05	1.87e-05	9.52e-05	0.000105908	0	9.53e-05	0.00451157	3.67e-05	0.000119268
ZOTU4838	0	8.37e-05	0	0	0	0	0	0	1.9e-05	0	0	0	0	0	0	0	0	0	0	0	0	0	0	0	0	0	0	0	0	3.61e-05	0	0	0	0	0	5.92e-05	0	0	0.000138115	0.00037679	0.000388612	0.000768164	0.00140915	0	0.000661652	0.000976912	0.0164525	0.000183513	0.00361779
ZOTU3638	0	0.000418419	0	0	0	0.000208914	0.000174764	0.000690429	0.000970117	0	0	0	0	0	0	0	0	0	0	0	0	6.74e-05	0	0	0	0	0	1.91e-05	1.68e-05	0.000451182	0.00142307	0.00128287	0	0	0.000105702	0.000454088	0.000150732	0.00121603	0.000207173	0.000110821	0.000511331	0.00275415	0.00337053	9.08e-05	0.000156707	0.00271629	0.0100284	0.00055054	1.99e-05
ZOTU4932	0	0	0	0	0	0	0	0.000207129	0.0033859	0	0	0	0	0	0	0	0	0	0	0	0	0	0	0	3.36e-05	0	0	0	0	7.22e-05	0	0.000135039	0	0	0	5.92e-05	0	0	0.00128907	0.001485	0.000102266	0	0	0.00835161	0.00557181	0	0	0.0170667	0.00164987
ZOTU3529	0	0	5.35e-05	0	0	0.000153203	0.000415065	0.0010529	0.00401362	0	0	0	0	0	0	0	0	1.72e-05	0	0	0	0	0	0	3.36e-05	0	0	3.82e-05	0	0.000469229	0.000559897	0.000911515	0	0	0	0.000355373	0.000732127	0.000994933	0.00087473	0.00124119	0.00112493	0.00177989	0.00106638	0.005598	0.00134072	0.000452715	0.00475677	0.00462453	0.000178902
ZOTU9533	2.66e-05	6.28e-05	0	0	0.00304431	0.00385794	0.00572352	0.00172607	0.000475547	0	0	0	0	0	0	0	1.69e-05	0.000120254	0.000197811	0	0	0	0	0	0	0	0	0.000362969	0.00309587	0.00319437	0.00398927	0.00226191	0.000217783	0.00189341	0.00160666	0.00203352	0.00295004	0.001345	6.91e-05	2.22e-05	0	0	0	0	0	0	0	0	0
ZOTU4884	0	0	0	0	0	1.39e-05	0	0	0.000114131	0	0	0	0	0	0	0	0	0	0	0	0	0	0	0	0	0	0	0	0	0	2.33e-05	0.000101279	0	0	0	9.87e-05	0	0	4.6e-05	2.22e-05	6.14e-05	3.75e-05	3.81e-05	0.00234511	0.000174119	0.000309752	0	0.00198194	0.000198779
ZOTU4623	0.000173144	0.00102513	0	0	0.000557858	0.0055571	0.0019661	0.00310693	0.00131251	3.28e-05	0	0	0	0	0	0	8.47e-05	0.0020615	0.00112093	0	0	0	0	0	0	0	0	0.000362969	0.00146381	0.00187692	0.00394261	0.00178927	0	0.00101125	0.00171236	0.0028035	0.00297158	0.00130815	4.6e-05	0.000155149	0	0.0002623	0	3.03e-05	0	0	0	0	1.99e-05
ZOTU724	0	0	0	0	0	0	0	0.000224389	0.000133153	0	0	0	0	0	0	0	0	0	0	0	0	0	0	0	0	0	0	0	0	7.22e-05	0	0.000101279	0	0	0	1.97e-05	0	0	0.001197	0.00157365	0.00482697	0.00474014	0.00504627	9.08e-05	0.000661652	0.000762468	0.00787073	3.67e-05	0
ZOTU4910	0	0	0	0	0	0	0	0.000293432	0.00125544	0	0	0	0	0	0	0	0	0	0	0	0	0	0	0	0	0	0	0	0	0.000234615	2.33e-05	0.000236319	0	0	0	1.97e-05	0	0	0.00310759	0.00274835	0.0041111	0.00361599	0.00904521	0.00311673	0.00203719	0.00100074	0	0.00401894	0.000159024
ZOTU11875	0	0	0	0	0	0	0	0	5.71e-05	0	0	0	0	0	0	0	0	0	0	0	0	0	0	0	0	0	0	0	0	0	0	0	0	0	0	0	0	0	4.6e-05	0	0	1.87e-05	0.000361808	0.000121038	0.00402215	0.00090543	0.00590918	0.00488145	0.00228596
ZOTU532	0	6.28e-05	0	0	0.000159388	0.00243733	0.00358266	0.00331406	0.00251089	0	0	0	0	0	0	0	1.69e-05	0.000669988	0.000461559	0	0	1.69e-05	0	0	0	0	0	0.000133726	0.00087492	0.00205739	0.00548233	0.00401742	5.94e-05	0.00032274	0.000782191	0.00357347	0.00176572	0.00296637	0.000230192	8.87e-05	4.09e-05	0	0	1.51e-05	0	0	0	0	0
ZOTU1136	0	0.00493734	0.000106926	0	0	1.39e-05	4.37e-05	0.000983861	0.00245382	0	0	0	0	0	0	0	0	0	8.79e-05	0	0	0	0	0	0	0	0	0	0	7.22e-05	4.67e-05	0.000742716	0	0	6.34e-05	0.00053306	2.15e-05	0	0.00324571	0.0025932	0.00169762	7.49e-05	1.9e-05	0.00605189	0.00598969	4.77e-05	0.000931738	0.00277105	0.000159024
ZOTU441	0	0	0	0	1.59e-05	0	0	0.000120825	0.000266307	0	0	0	0	0	0	0	0	0	0	0	0	0	0	0	0	0	0	0	0	3.61e-05	2.33e-05	0.000101279	0	0	2.11e-05	3.95e-05	0	0	0.000391326	0.000398954	0.000449971	0.000618279	0.00108543	0.000378243	0.0266054	0.000405061	2.45e-05	0.00155986	0.000477071
ZOTU4146	0	0.00205025	0	0	0	0	0	0	0.000285328	0	0	0	0	0	0	0	0	0	0	0	0	0	0	0	0	0	0	0	0	5.41e-05	0	3.38e-05	0	0	0	1.97e-05	0	0	0.0017955	0.00150716	0.00300663	0.00065575	0.000837872	0.000665708	0	0.00290691	0.0137799	1.84e-05	0
ZOTU486	0	0	0	0	0.000191266	0.00129527	0.00465309	0.00302063	0.00188317	0	0	0	0	0	0	0	0	0.000309225	4.4e-05	0	0	0	0	0	0	0	0	7.64e-05	0.000168254	0.000487277	0.00258953	0.00459134	0	0.000494868	0.000169122	0.000908176	0.00465116	0.0041824	0.00147323	0.000421118	0.000470425	0.000543336	0.000399893	0.000181557	3.48e-05	0	0	0	0
ZOTU3393	0	0	0	0	0	1.39e-05	0	0.0004833	0.0018261	0	0	0	0	0	0	0	0	0	0	0	0	0	0	0	0	0	0	0	0	0.00039704	0.00025662	0.000405118	0	0	0	0.000355373	0	0	0.00313061	0.0062946	0.00308844	0.00342864	0.00205659	0.00202739	0.00464898	0	0	0.00157821	0.00137158
ZOTU14193	0	2.09e-05	0	0	1.59e-05	0.000362117	0.000371374	0.000517822	0.000608701	0	0	0	0	0	0	0	0	1.72e-05	0	0	0	1.69e-05	0	0	0	0	0	0	8.41e-05	0.00019852	0.000186632	0.000270079	0	0	6.34e-05	0.000256658	0.000366064	0.000257946	0.00200267	0.000997385	0.000593144	0.000487129	0.000323723	0.000605189	0.000348238	0.000262098	0.00191252	0.000403729	0.000556583
ZOTU5861	4e-05	0.000523023	0	0	0.000382531	0.00300836	0.0058546	0.0033831	0.00129349	1.64e-05	0	0	0	0	0	0	1.69e-05	5.15e-05	6.59e-05	0	0	0	1.64e-05	0	0	0	0	0.000191037	0.00139651	0.00205739	0.00363933	0.00270079	3.96e-05	0.00124793	0.000824472	0.00120432	0.00131352	0.000608015	0.000184154	0.000199477	0	0	0	6.05e-05	0	0	0	0	0
ZOTU12929	0	2.09e-05	0	0	0	0	0	0.0015362	0.00367123	0	1.4e-05	0	0	0	0	0	0	1.72e-05	0	0	0	0	0	0	0	0	0	0	0	0.000577513	0.000139974	0.000708956	0	0	0	0.000848947	0.000258398	0.000239521	0.00333778	0.001485	0.000347705	9.37e-05	0.00133298	0.00520463	5.22e-05	0.00762468	0	0.00159657	0
ZOTU3578	0	2.09e-05	0	0	1.59e-05	0	0	0.000293432	0.00184512	0	0	0	0	0	0	0	0	0	0	0	0	0	0	0	0	0	0	0	0	0.00019852	9.33e-05	0.000270079	0	0	0	0.000197429	0	0	0.00184154	0.00279268	0.000613597	0.000355979	0.000285638	0.0070202	0.00435297	0	0	0.00844161	0.000298169
ZOTU3416	0	0	0	0	0	0	0	0.000276172	0.000342394	0	0	0	0	0	0	0	0	0	0	0	0	0	0	0	0	0	0	0	0	0.000162426	2.33e-05	6.75e-05	0	0	0	0.000177687	0	0	0.0015653	0.00316947	0.00413156	0.00299771	0.00491298	0.00131629	0.00315155	0.00350258	0	0.00166997	0
ZOTU3086	0	0	0	0	0	0	0	0	0	0	0	0	0	0	0	0	0	0	0	0	0	0	0	0	0	0	0	0	0	0	0	0	0	0	0	0	0	0	0	0	0	0	0	0	0	0.000357407	0.0196891	0	0
ZOTU3462	0	0	0	0	0	0	0	1.73e-05	0.000133153	0	0	0	0	0	0	0	0	0	0	0	0	0	0	0	0	0	0	0	0	0	0	0	0	0	0	0	0	0	0	2.22e-05	0.000245439	0.000543336	0.00194234	0.000378243	0.00275108	0.00357407	0	0.00304632	0.0103365
ZOTU1396	0	0	0	0	0	0	0	0.000138086	0.000266307	0	0	0	0	0	0	0	0	0	0	0	0	0	0	0	0	0	0	0	0	3.61e-05	0	3.38e-05	0	0	0	1.97e-05	0	0	0.00147323	0.00170664	0.00327252	0.00247311	0.00807404	6.05e-05	0.00396991	2.38e-05	0	0.00189019	0.00429364
ZOTU1768	0	0	0	0	0	0	0	1.73e-05	7.61e-05	0	0	0	0	0	0	0	0	0	0	0	0	0	0	0	0	0	0	0	0	5.41e-05	0	3.38e-05	0	0	0	0	0	0	0.000207173	0.000243805	0.000347705	0.000599543	0.000837872	0.000302595	0.00607675	0.00233506	0	0.00640461	0.00210706
ZOTU977	0	0	0	0	0	0	0	0	0	0	0	0	0	0	0	0	0	0	0	0	0	0	0	0	0	0	0	0	0	0	0	0	0	0	0	0	0	0	0	0	0	0	0	0	0	0	0.000367791	0	0
ZOTU4238	0	0	0	0	0	0	0	0	0	0	0	0	0	0	0	0	0	0	0	0	0	0	0	0	0	0	0	0	0	0	0	0	0	0	0	0	0	0	0	2.22e-05	4.09e-05	3.75e-05	0.00230415	3.03e-05	0	0.00119136	0.00370243	0	0
ZOTU3644	0	0.000125526	0	0	0	0.000167131	0.000131073	0.00126003	0.00207339	1.64e-05	0	0	0	0	0	0	0	0	0.000131874	0	0	1.69e-05	3.27e-05	0	0	0	0	0	0	0.000180473	0.00025662	0.000843996	0	0	2.11e-05	0.00126355	0	9.21e-05	0.00260117	0.00478745	0.00300663	0.00172369	0.000761702	0.001982	0.0020546	0.000119136	0	0.00161492	0
ZOTU3968	0	0	0	0	0	0	0	0	0	0	0	0	0	0	0	0	0	0	0	0	0	0	0	0	0	0	0	0	0	0	0	3.38e-05	0	0	0	0	0	0	2.3e-05	0	4.09e-05	0	3.81e-05	0	0	0	0	0	0
ZOTU1052	0	0	2.67e-05	0	0	0	0	0	0	0	0	0	0	0	0	0	0	0	0	0	0	0	0	0	0	0	0	0	0	0	0	0	0	0	0	0	0	0	0	0	0	0	0	0	0	0	0.000171636	1.84e-05	0
ZOTU4888	0	0	0	0	0	0	0	0.000258911	0.000589679	0	0	0	0	0	0	0	0	0	0	0	0	0	1.64e-05	0	0	0	0	0	0	0	0	6.75e-05	0	0	0	9.87e-05	0	0	2.3e-05	0.000243805	0.000449971	0.000430921	0.000571276	0.00172479	0.00141036	0	0	0.00488145	0.00133182
ZOTU11066	0	0	0	0	0	0	0	6.9e-05	0.000114131	0	0	0	0	0	0	0	0	0	0	0	0	0	0	0	0	0	0	0	0	3.61e-05	2.33e-05	3.38e-05	0	0	0	0	0	0	0.000207173	8.87e-05	0.000122719	9.37e-05	0.000361808	7.56e-05	5.22e-05	0.00185852	0.000956257	0.000110108	0.0192617
ZOTU1394	0	0	0	0	1.59e-05	2.79e-05	2.18e-05	6.9e-05	0.000209241	0	0	0	0	0	0	0	0	0	0	0	0	0	0	0	0	0	0	0	0	0.000180473	0	3.38e-05	0	0	0	1.97e-05	0	0	4.6e-05	6.65e-05	0.00165671	0.000618279	0.00557946	0.000136168	1.74e-05	0.00912578	0	0.000642296	0.000337925
ZOTU14224	0.00594017	0.00292893	8.02e-05	0	0.000159388	0.000696379	0.00259962	0.000431518	0	0.000131208	0	0	0	0	0	0	0.00729791	0.00429479	0.000263748	0	0	0.00106189	0.00022908	0	0	0	0	1.91e-05	0.000471111	0.00135355	0.000933162	0.000337598	0	0.000236676	4.23e-05	5.92e-05	0	0	0	0	0	0	0	0	0	0	0	0	0
ZOTU7140	0.000293013	0.00430971	2.67e-05	0.000342321	0	0	2.18e-05	0.000103564	0	0.000114807	0	0	0	0	0	0	0	0.000103075	0.0017803	0.000127832	0.0019548	0.000505663	0.000310894	0	0	0	0	0	1.68e-05	0.000252662	2.33e-05	0	0	0	0	0	0	0	2.3e-05	0	0	0	0	0	0	0	0	0	0
ZOTU4197	0.000466157	0.000271972	0	0	0.000478164	0.000278552	0	8.63e-05	3.8e-05	0.00149249	0.000670925	0	0	0	0	0	0.000304785	0.000309225	6.59e-05	0	0.00284999	0	3.27e-05	0.000128008	0.000906771	0	0.0224669	0.000171933	0.000134603	0.00019852	2.33e-05	6.75e-05	0.000237581	0	2.11e-05	0.000375116	0.00081826	0	0.000253211	0.000132985	0.000102266	9.37e-05	3.81e-05	3.03e-05	0	0	0	0	0
ZOTU637	0	0	0	0	0	0	0	0	0	0	0	0	0	0	0	0	0	0	0	0	0	0	0	0	0	0.00728728	0.0250081	0	0	0	0	0	0	0	0	0	0	0	0	0	0	0	0	0	0	0	0	0	0
ZOTU7675	0	0	0	0	3.19e-05	0	0	0	0	0	0	0	0	0	0	0	0	0	0	0	0	0	0	0	0	0.0111875	0.00851081	0	0	0	0	3.38e-05	0	0	0	0	0	0	0	0	0	0	0	0	0	0	0	0	0
ZOTU1807	0	0	0	0	0	0	0	0	0	0	0	0	0	0	0	0	1.69e-05	0	6.59e-05	0	0	0	0	0	0	0	0.0130687	0	0	1.8e-05	0	0	0	0	0	0	0	0	2.3e-05	0	0	0	0	0	0	0	0	0	0
ZOTU1827	0	0	0	0	0	0	2.18e-05	1.73e-05	0	0	0	0	0	0	0	0	0	0	0	0	0	0	0	0	0	0.0108454	0	0	0	0	0	0	0	0	0	0	0	0	6.91e-05	4.43e-05	0	0	0	0	0	0	0	3.67e-05	0
ZOTU2849	0.000133188	0.000104605	0	0	0.00108384	0.00238162	0.00216271	0.00222663	0.000836963	4.92e-05	0	0	0	0	0	0	0.000186258	0.000566913	0	0	0	0	0	0	0	0	0	0.000362969	0.00087492	0.000757986	0.00202963	0.00259951	0.00051476	0.00189341	0.00240999	0.00361296	0.0104221	0.0127499	0.00128907	0.00124119	0.000899943	1.87e-05	3.81e-05	0	0	0	0	0	0
ZOTU2314	0.000119869	4.18e-05	5.35e-05	0	0.000828817	0.00204735	0.00107043	0.000983861	0.000133153	1.64e-05	0	0	0	0	0	0	0.000152393	0.00128844	0	0	3.65e-05	0	0	0	0	0	0	0.000286555	0.000959047	0.00079408	0.00172635	0.00138415	0.000296977	0.000559416	0.00253684	0.000394859	0.000689061	0.00263473	0.000184154	0.000177313	6.14e-05	0	0	0	0	0	0	0	0
ZOTU10291	0	0	0	0	0.00323558	0.000612813	0.00019661	0.000258911	3.8e-05	0	0	0	0	0	0	0	1.69e-05	0	0	0	0	0	0	0	0	0	0	0.00328583	0.00156476	0.000848222	0.000116645	6.75e-05	0.00326675	0.00032274	0.000951314	5.92e-05	4.31e-05	0	0	0	0	0	0	0	0	0	0	0	0
ZOTU3376	0	6.28e-05	0	0	7.97e-05	0.000626741	0.000131073	0.000673168	0.000494569	0	0	0	0	0	0	0	0	0.000137433	0	0	0	0	0	0	0	0	0	0.000114622	0.000168254	0.000378993	0.000583226	0.000371358	3.96e-05	0.000602449	0.00069763	0.00124381	0.00318691	0.00502994	0.000115096	0	0	0	0	1.51e-05	0	0	0	0	0
ZOTU4717	0	0	0	0	0.000318776	0.000905292	0.000371374	0.00046604	0.000380438	0	0	0	0	0	0	0	0	0.00020615	0	0	0	0	0	0	0	0	0	3.82e-05	0.000117778	5.41e-05	0.000233291	0.000540157	0.000217783	0.00032274	0.000782191	0.000434345	0.00381137	0.00292953	0	0	0	0	0	0	0	0	0	0	0
ZOTU118	0	0	0	0	0	0	0	0	0	0	0	0	0	0	0	0	0	0	0	0	0	0	0	0	0	0	0	0	0	0	0	0	0	0	0	1.97e-05	0	0	0	0	0	0	0	0	0.000104471	0	0	0	0.065478
ZOTU521	0	0	0	0	0	0	0	6.9e-05	0.000114131	0	0	0	0	0	0	0	0	0	0	0	0	0	0	0	0	0	0	1.91e-05	0	0	0	6.75e-05	0	0	0	0	0	0	0	0	0	0	0	0	0	0.000214444	0	0	0.0218061
ZOTU1057	0	0	0	0	0	0	0	1.73e-05	0.000133153	0	0	0	0	0	0	0	0	0	0	0	0	0	0	0	0	0	0	0	0	0	0	3.38e-05	0	0	0	7.9e-05	0	0	0	0	0	0	0	0.000998563	0.000348238	0	0	0.0111943	0.0111714
ZOTU614	0	0	0	0	0	0	0	0	0	0	0	0	0	0	0	0	0	0	0	0	0	0	0	0	0	0	0	0	0	0	0	0	0	0	0	0	0	0	0	0	0	0	0	0	0	0	0.0233915	0	0
ZOTU7023	0	0	0	0	0.000541919	0.00185237	0.00404142	0.00222663	0.000513591	0	0	0	0	0	0	0	0	0	0	0	0	0.00114617	1.64e-05	0	0	0	0	0.000401177	0.000807619	0.0012994	0.00214627	0.00118159	0.000158388	0.000172128	0.000232543	0.000296144	0.000602929	0	0	4.43e-05	4.09e-05	0.00013115	0	0	0	0	0	0	0
ZOTU11093	0	0	0	0	0	4.18e-05	0.00087382	0.00163977	0.00211143	0	0	0	0	0	0	0	0	0	0	0	0	0	0	0	0	0	0	0	1.68e-05	0.00019852	0.00109647	0.00135039	0	0	2.11e-05	0.000177687	0.000387597	0	0.00131209	0.00164014	0.000572691	0	1.9e-05	0.000605189	0	0	0	1.84e-05	0
ZOTU174	0	0	0	0	0	0	0	0	0	0.000147609	0.0165355	0.00411607	0	0.0847806	0	0	0	0	0	0	0	0	0	0	0	0	0	0	0	0	0	0	0	0	0	0	0	0	0	0	0	0	0	0	0	0	0	0	0
ZOTU817	0	0	2.67e-05	0	0	0	0	0	0	0.0265696	0.0111541	0.0148179	0	0	0	0	0	0	0	0	0	0	0	0	0	0	0	0	0	0	0	0	0	0	0	0	0	0	0	4.43e-05	0	0	0	0	0	0	0	0	0
ZOTU545	0	0	0	0	0	0	0	0	0	0.00273896	0.00058706	0.00311872	0.022987	0	0	0	0	0	0	0	0	1.69e-05	0	0	0	0	0	0	0	0	0	0	0	0	0	0	0	0	0	0	0	0	0	0	0	0	0	0	0
ZOTU871	0	0	0	0	0	0	0	0	0	0	2.8e-05	0	0	0	0	0	0	0	0	0	0	0	0	0	0	0	0	0	0	0	0	0	0	0	0	0	0	0	0	0	0	0	0	0	0	0	0	0	0
ZOTU424	2.66e-05	0.00271972	2.67e-05	0	0	0	0	0	0	0.0051499	0.00944886	0.00867542	0	0	0	0	0	0	2.2e-05	0	0	1.69e-05	0	0	0	0	0	0	0	0	0	0	0	0	0	0	0	0	0	0	0	0	0	0	0	0	0	0	0
ZOTU3589	0	0	0	0	0	0	0	0	0	0.000787247	0.0102037	0	0.0140301	0	0	0	0	0	0	0	0	0	0	0	0	0	0	0	0	0	0	0	0	0	0	0	0	0	0	0	0	1.87e-05	0	0	0	0	0	0	0
ZOTU1448	0	0	0	0	0	0	0	0	0	0.00264056	0.0038718	0.00310289	0.0149056	0	0	0	0	0	0	0	0	0	0	0	0	0	0	0	0	0	0	0	0	0	0	0	0	0	0	0	0	0	0	0	0	0	0	0	0
ZOTU10395	0.00207773	0.000502103	0	0	0.000318776	0.000807799	0.00161657	0.0014499	0.000228263	0.00126287	4.19e-05	0.00332452	0	0	0	0	0.00165939	0.00084178	0.00107697	0.000170442	0	0.00037082	9.82e-05	0	0	0	0	0.000133726	0.000420635	0.000306804	0.00048991	0.000945275	7.92e-05	0.000710029	0.00065535	0.00124381	0.000129199	5.53e-05	2.3e-05	0	0	0	0	0	0	0	0	0	0
ZOTU7769	0.00278362	0.0008996	0	0	0	0.000208914	0.00122335	0.000638647	1.9e-05	0.00190251	0.00125799	0	0	0	0	0	0.0060957	0.000962034	0.000153853	7.1e-05	0	0.000134844	4.91e-05	0	0	0	0	0	5.05e-05	0.000162426	0.00104981	0.000270079	0	0.00101125	6.34e-05	1.97e-05	0	0	0	0	0	0	0	0	0	0	0	0	0
ZOTU6386	0	0	5.35e-05	0	0	0	0	0	0	0.000213213	0.005619	0.00535089	0	0	0	0	0	0	2.2e-05	0.000113628	0.00158942	0	0	0	0	0	0	0	0	0	0	0	0	0	0	0	0	0	0	0	0	0	0	0	0	0	0	0	0
ZOTU1237	0	0	0	0	0	1.39e-05	4.37e-05	0	3.8e-05	0	0	0	0	0	0	0	0	0	0	0	0	0.00498921	0.000179991	0.000768049	0.000335841	0.00513189	0	0	0	0	0	0	0	0	0	3.95e-05	0	7.37e-05	0	0	0	0	0	0	0	0	0	5.51e-05	0
ZOTU11501	0.000186463	0.000125526	0	0	0.000111572	0.000682451	0.00102674	0.000742211	9.51e-05	0	0	0	0	0	0	0	0.00013546	0.000927676	0.000263748	0	0	0	0	0	0	0	0	5.73e-05	0.000370158	0.000216567	0.00177301	0.000877756	1.98e-05	0.000774577	0.000317105	0.00122406	0.000452196	0.000608015	6.91e-05	2.22e-05	2.05e-05	0	0	0	0	0	0	0	0
ZOTU665	0.000998908	0	0	0	0.000302837	0.0004039	0.000109228	0.000103564	1.9e-05	0	0	0	0	0	0	0	0.000118528	0.000532555	0	0	0	0.00242718	0.00855778	0.00082291	0.000671682	0	0	0.0015474	0.00538412	0.00120917	0.000163303	0	0.000277178	0	0.000253684	7.9e-05	0.00329457	0	0	0	0	0	0	0	0	0	0	0	0
ZOTU862	0.000226419	0.000209209	0	0	0.00275741	0.00572423	0.0108791	0.00151894	0.00159784	0.000278817	0.000195687	0	0	0	0	0	0.000372515	0.00415736	0.000175832	0	0	0	0	0	0	0.00769783	0	0.00152829	0.00378571	0.00221982	0.00300945	0.00303838	0.00116811	0.0055081	0.00526394	0.00298118	0.0081826	0.00322432	0	0	0	0	0	0	0	0	0	0	1.99e-05
ZOTU4540	0.00010655	0.000125526	2.67e-05	0	0.00325151	0.00252089	0.0014855	0.000966601	0.000760876	3.28e-05	0	0	0	0	0	0	0.000118528	0.000876138	0.000109895	0	0	0	0	0	0	0	0	0.000936079	0.00129556	0.00189496	0.00207629	0.00199183	0.000296977	0.000279708	0.00215631	0.000987147	0.000344531	0.00329802	2.3e-05	8.87e-05	0	0	0	0	0	0	0	0	0
ZOTU469	0.000306332	4.18e-05	0	0	0.00277335	0.00271588	0.00227193	0.00103564	0.000114131	3.28e-05	0	0	0	0	0	0	0.00027092	0.00252534	0.000131874	0	0	0	0	0	0	0	0	0.00213961	0.00117778	0.00147988	0.00118978	0.00172175	0.000910729	0.000817609	0.00171236	0.000236915	0.000559862	0.00027637	0	0	0	0	0	0	0	0	0	0	0
ZOTU11934	1.33e-05	8.37e-05	0	0	0.000701307	0.00239554	0.00181318	0.00127729	0.00102718	1.64e-05	0	0	0	0	0	0	0	0.000188971	0	0	0	0	0	0	0	0	0	0.000267451	0.000959047	0.0013355	0.00258953	0.00155295	5.94e-05	0.00021516	0.000401666	0.00116483	0.000861326	0.00173192	0.000161134	0.000354626	6.14e-05	0	0	0.000136168	0	0	0	0.000183513	0
ZOTU3880	0	2.09e-05	0	0	0.000207204	0.00101671	0.000305837	0.000293432	0.000551635	1.64e-05	0	0	0	0	0	0	0	5.15e-05	0	0	0	0	0	0	0	0	0	9.55e-05	0.000370158	0.000288757	0.000699872	0.000945275	9.9e-05	0	0.00171236	0.00104638	0.00585702	0.00221096	2.3e-05	0	0	0	0	0	0	0	0	0	0
ZOTU11639	0.0002131	0.000251051	0	0	0.000255021	0.000584958	0.00122335	0.00101838	0.00125544	0.000196812	0	0	0	0	0	0	0.000220123	0.000601271	0.000263748	0	0	0	0	0	0	0	0	0.00021014	0.000622539	0.000252662	0.000349936	0.00114783	0.000316775	0.00238828	0.00114158	0.00136226	0.000129199	3.68e-05	0.000230192	0.000132985	0	0	0	0	0	0	0	0	0
ZOTU4686	4e-05	4.18e-05	0	0	0.000446286	0.00116992	0.00183502	0.000586865	0.000114131	0	0	0	0	0	0	0	0.000101595	5.15e-05	0	0	0	0	1.64e-05	0	0	0	0	0.000229244	0.00100952	0.000938459	0.000909833	0.000877756	0.000356372	0.000451836	0.00069763	0.000296144	0.00167959	0.000221096	2.3e-05	0	0	1.87e-05	0	1.51e-05	0	0	0	1.84e-05	0
ZOTU8563	0	0	0	0	0	0	0	0	0	0.000442826	0.000880589	0.00324537	0	0.00735735	0	0	0	0	0	0	0	0	0	0	0	0	0	0	0	0	0	0	0	0	0	0	0	0	0	0	0	0	0	0	0	0	0	0	0
ZOTU1075	0	4.18e-05	0	0	0	0	0	0	0	0	0	0	0	0	0.0274143	0	0	0	0	0	0	1.69e-05	0	0	0	0	0	0	0	0	0	0	0	0	0	0	0	0	0	0	0	0	0	0	0	0	0	0	0
ZOTU13509	0.00115873	0.000543944	0	0	0.0123207	0.013663	0.0100708	0.00592043	0.00292937	0.00016401	0.000265575	0	0	0	0	0	0.00160859	0.00396839	0.000109895	0	0	8.43e-05	3.27e-05	0	0	0	0	0.00983838	0.024666	0.0186067	0.0140908	0.00783228	0.00570195	0.0113605	0.0116272	0.0122999	0.00566322	0.00193459	2.3e-05	6.65e-05	0	1.87e-05	0	0	0	0	0	0	0
ZOTU10160	5.33e-05	4.18e-05	0	0	0.00162576	0.00192201	0.00102674	0.00072495	0.000627723	0	0	0	0	0	0	0	1.69e-05	3.44e-05	0	0	0	1.69e-05	0	0	0	0	0	0.000859665	0.00203587	0.0012994	0.00142307	0.000607677	0.000673147	0.00165673	0.000274824	0.000651517	0.00040913	0.000110548	6.91e-05	0	6.14e-05	0	0	0	0	0	0	0	0
ZOTU3409	0.00279694	0.000983284	0	0	0.000175327	0.000654596	6.55e-05	1.73e-05	0	0.000246015	0	0	0	0	0	0	0.00487656	0.0012369	0	0	0	1.69e-05	4.91e-05	0	0	0	0	5.73e-05	0.000487936	0.000324851	0.000116645	0	0.000277178	0.000645481	0.000866753	1.97e-05	0	0	0	0	0	0	0	0	0	0	0	0	0
ZOTU2089	0.00647292	0.00211302	0	0.00032602	0.00079694	0.00155989	0.000655365	0.000207129	5.71e-05	0.000196812	0	0	0	0	0	0	0.00846625	0.0021474	2.2e-05	0	0	0.000117988	1.64e-05	0	0	0	0	0.00078325	0.00178349	0.00126331	0.000676543	0.000472638	0.000871132	0.00118338	0.00177579	0.000296144	0	0	0	0	0	0	0	0	0	0	0	0	0
ZOTU3947	2.66e-05	0	0	0	0.000478164	0.000988858	0.00203163	0.000155347	0.000171197	9.84e-05	5.59e-05	0	0	0	0	0	3.39e-05	0.00063563	0	0	0	0	0	0	0	0	0	0.000229244	0.000588889	0.000415088	0.000419923	0.000236319	0.000138589	0	0.00105701	0.00053306	0.00167959	0.000552741	0.000161134	0	0	0	0	0	0	0	0	0	0
ZOTU2783	0.000679257	0.000774075	2.67e-05	0	3.19e-05	0.000779944	0.00063352	0.000327954	0.000209241	0	0	0	0	0	0	0	0.000237055	0.00144305	0.000285727	0	0	0.000101133	0	0	0	0	0	1.91e-05	0.000336508	0.000270709	0.000559897	0.000337598	5.94e-05	0.000279708	0.000317105	0.000414602	0.000559862	0.000644864	0.000207173	0.000443282	0.000674957	0	0	0	0	0	0	0	0
ZOTU3740	0	2.09e-05	0	0	0.000207204	0.000696379	0.000917511	0.00131182	0.0012174	0	0	0	0	0	0	0	0	0	6.59e-05	0	0	0	0	0	0	0	0	0.000114622	0.000336508	0.000739939	0.00163303	0.00155295	0	0	0.000105702	0.00112535	0.00232558	0.0014924	0.000506422	0.00048761	0	0	0	0.000363114	0	0	0	0.000220216	0
ZOTU11554	0.000119869	0.000355656	0	0	0.00537137	0.00614206	0.00668473	0.00576508	0.00397558	4.92e-05	0	0	0	0	0	0	0.000389448	0.00170074	0.000241769	0.000156239	0	0	3.27e-05	0	0	0	0	0.00278913	0.00999428	0.0093124	0.00863175	0.00948651	0.000791938	0.00197947	0.00314991	0.00633749	0.00624462	0.00519576	0.00214079	0.00150716	0.00143173	0.000149886	0	1.51e-05	0	0	0	0	0
ZOTU4695	0	0.000125526	0	0	0.000717246	0.00342618	0.000458756	0.00120825	0.000285328	1.64e-05	0	0	0	0	0	0	0	0.00188971	0.000109895	2.84e-05	0	0	0	0	0	0	0	0.000496695	0.00173302	0.00187692	0.00186633	0.00216063	0.000118791	0.000193644	0.000422806	0.00134252	0.000366064	0.000810686	4.6e-05	6.65e-05	0	0	0	0	0	0	0	0	0
ZOTU1338	0	0	0	0	0	0	0	0	0	0	0	0	0	0	0	0	0	0	0	0	0	0	0	0.000347451	0	0.00947689	0.00431591	0	0	0	0	0	0	0	0	0	0	0	0	0	0	0	0	0	0	0	0	0	0
ZOTU7167	7.99e-05	0.000397498	0	0	0	0	0	0	0	6.56e-05	0	0	0	0	0	0	0	1.72e-05	0.000549475	0.00132093	0.00858651	0	3.27e-05	5.49e-05	0	0	0	0	0	0	0	0	0	0	0	0	0	0	0	0	0	0	0	0	0	0	0	0	0
ZOTU11143	0	0	0	0	0	4.18e-05	8.74e-05	6.9e-05	0.000171197	0	0	0	0	0	0	0	0	0	0	0	0	0	0	0	0	0	0	0	0	1.8e-05	0.000163303	3.38e-05	0	0	0	0.000296144	0.000452196	0.000239521	0.000483403	0.000820072	0.000572691	0.000562071	0.00146628	0.00184583	0.000487533	0	0	0.00170667	0.000914386
ZOTU12275	0	0	0	0	0	0	0	0	0	0	0	0	0	0	0	0	0	0	0	0	0.000621152	0	0	0	0.00114186	0.00855315	0	0	0	0	0	0	0	0	0	0	0	0	0	0	2.05e-05	0	0	0	0	0	0	0	0
ZOTU646	0	0	0	0.00180941	0	0	0	1.73e-05	0	4.92e-05	0	0	0	4.28e-05	0	0	0	1.72e-05	0	0	0	0.00229234	0.00971954	0.0214688	0.0267329	0.103493	0.0568732	0	0	0	2.33e-05	0	0	0	0	0	0	0	0	0	0	0	0	0	0	0	0	0	0
ZOTU6875	0	0	0.0275335	0.0530108	0	0	0	0	0	0	0	0	0	0	0	0	0	0	0	0	0	0.000219121	0.000310894	0.000201156	0	0	0	0	0	0	0	0	0	0	0	0	0	0	0	0	0	0	0	0	0	0	0	0	0
ZOTU353	0	0	0	0	0	0	0	0	0	0	0	0	0	0	0	0	0	0	0	0	0	1.69e-05	0.00045816	0.00713189	0.0429541	0.015772	0.00544531	0	0	0	0	0	0	0	0	0	0	0	0	0	0	0	0	0	0	0	0	0	0
ZOTU8401	0	0	0.00628191	0.0445995	0	0	0	0	0	1.64e-05	0	0	0	0	0	0	0	0	0	0	0	0.000168554	0.0028635	0.000694902	0	0.00393445	0	0	0	0	0	0	0	0	0	0	0	0	0	0	0	0	0	0	0	0	0	0	0
ZOTU6333	0.00054607	6.28e-05	0	0	0	0	0	0	0	0	0	0	0	0	0	0	0.00033865	0	0	0	0	0.0104167	0.0234643	0.00256016	0.00278748	0.00078689	0.00943853	0	0	0	0	0	0	0	0	0	0	0	0	0	0	0	0	0	0	0	0	0	0
ZOTU281	0	0	0	0	0	0	0	0	0	0	0	0	0	0	0	0	0	0	0	0	0	0.00188781	0.0223517	0.00407798	0.00191429	0.0144035	0	0	0	0	0	0	0	0	0	0	0	0	0	0	0	0	0	0	0	0	0	0	0
ZOTU399	0	8.37e-05	0.00545323	0.00264076	0	0	0	0	0	0	0	0	0	0	0	0	0	0	0	0	0	0.0101975	0.0123376	0.00113379	0.0021158	0.00800575	0	0	0	0	0	0	0	0	0	0	0	0	0	0	0	0	0	0	0	0	0	0	0
ZOTU601	0	0	0	0	0	0	0	0	0	0	0	0	0	0	0	0	0	0	0	0	0	0	0	0	0	0	0	0	0	0	0	0	0	0	0	0	0	0	0	0	0	0	0	0	0	0	0.00382503	0	0
ZOTU1635	0	0.000271972	2.67e-05	0	1.59e-05	0	0	0	0	0	0	0	0	0	0	0	0	0	2.2e-05	0.000738584	0.027824	0	0	0	0	0	0	0	0	0	0	0	0	0	0	0	0	1.84e-05	0	0	0	0	0	0	0	0	0	0	0
ZOTU7001	4e-05	0.000983284	0.00179101	0.000472728	0	0	0	0	0	6.56e-05	6.99e-05	0	0	0.0246385	0	0	0	0	6.59e-05	0	0	0	0	0	0	0	0	0	0	0	0	0	0	0	0	0	0	0	0	0	0	0	0	0	0	0	0	0	0
ZOTU666	0	0	0	0	0	1.39e-05	0	0	0	0	0	0	0	0	0	0	0	0	0	0	0	8.43e-05	0.00011454	0.00757077	0.00624664	0.00821102	0.0040739	0	0	0	0	0	0	0	0	0	0	0	0	0	0	0	0	0	0	0	0	0	0
ZOTU1898	0	0	0.00617499	0.0170997	0	0	0	0	0	0	0	0	0	0	0	0	0	0	0	0	0	0	0	0	0	0	0	0	0	0	0	0	0	0	0	0	0	0	0	0	0	0	0	0	0	0	0	0	0
ZOTU747	0	0	0	0.00881883	0	0	0	0	0	0	0	0	0	0	0	0	0	0	0	0	0	1.69e-05	0.00034362	0.00175554	0.00110827	0.00239488	0.0082688	0	0	0	0	0	0	0	0	0	0	0	0	0	0	0	0	0	0	0	0	0	0
ZOTU642	0	0.000188288	0.0099174	0.00872103	0	0	0	0	0	0	0	0	0	0	0	0	0	0	6.59e-05	0	0.00339807	6.74e-05	0	0	0	0	0	0	0	0	0	0	0	0	0	0	0	0	0	0	0	0	0	0	0	0	0	0	0
ZOTU5591	0	0.000188288	0.00275335	0.0174094	0	0	0	0	0	0	0	0	0	0	0	0	0	0	0	0	0	0.000943905	0.000163629	9.14e-05	0	0	0	0	0	0	0	0	0	0	2.11e-05	0	0	0	0	0	0	0	0	0	0	0	0	0	0
ZOTU8846	0	0	0	0	0	1.39e-05	0	0	0	0	0	0	0	0	0	0	0	0	0	0	0	0.000134844	0.000523612	0.00762563	0.0050712	0.00218961	0.0047596	0	0	0	0	0	0	0	0	0	0	0	0	0	0	0	0	0	0	0	0	0	0
ZOTU11474	0	0.000271972	0	1.63e-05	0.000350653	0.000208914	0.000327683	0.000189868	3.8e-05	0.00034442	0.0109165	0.00467016	0	0	0	0	5.08e-05	3.44e-05	0	0	0	0.000286543	3.27e-05	0	0	0	0	5.73e-05	0.00021873	0.000252662	0.000326607	6.75e-05	5.94e-05	0	6.34e-05	0.000118458	0.000150732	0.000331644	4.6e-05	6.65e-05	2.05e-05	0	0	0	0	0	0	0	0
ZOTU8325	0	0	0	0	0	0	0	0	0	0	0	0	0	0	0	0	0	0	0	0	0	0	0	0	0	0	0	0	0	0	0	0	0	0	0	0	0	0	0	0	0	0	0	0	0	0	0	0	0
ZOTU1163	0	0	0	0	0	0	0	0	0	0	0	0	0	0	0	0	0	0	0	0	0	0.00187096	0.000932683	0.00146295	0	0.0133087	0	0	0	0	0	0	0	0	0	0	0	0	0	0	0	0	0	0	0	0	0	0	0
ZOTU703	0	0	0	0	0	0	0	0	0	0	0	0	0	0	0	0	0	0	0	0	0	0.000252832	0.00397618	0.0105698	0.00144412	0.00119744	0	0	0	0	0	0	0	0	0	0	0	0	0	0	0	0	0	0	0	0	0	0	0
ZOTU557	0.00960283	0.00604615	0.000267315	0	0	0	0	0	0	0	0	0	0	0	0	0	0	0	0	0	0	0	0	0	0	0	0	0	0	0	0	0	0	0	0	0	0	0	0	0	0	0	0	0	0	0	0	0	0
ZOTU2751	0	6.28e-05	2.67e-05	0	0	0	0	0	0	1.64e-05	0	0	0	0	0	0	0	1.72e-05	0	0	0	0.00642193	0.00751055	0.000512033	0.00100752	0	0	0	0	0	0	0	0	0	0	0	0	0	0	0	0	0	0	0	0	0	0	0	0
ZOTU1116	0	0	0	0	0	0	0	0	0	0	0	0	0	0	0	0	0	0	0	0	0	0	3.27e-05	0.0062724	0.00473536	0	0.00423524	0	0	0	0	0	0	0	0	0	0	0	0	0	0	0	0	0	0	0	0	0	0
ZOTU1382	0	0.000125526	0.0109599	0.00414045	0	0	0	0	0	0	0	0	0	0	0	0	0	0	0	0	0	1.69e-05	0	0	0	0	0	0	0	0	0	0	0	0	0	0	0	0	0	0	0	0	0	0	0	0	0	0	0
ZOTU4939	0	0	0	0	0	0	0	0	0	0	0	0	0	0	0	0	0	0	0	0	0	0.000219121	3.27e-05	0.00160925	0.00198146	0.00537138	0.00584866	0	0	0	0	0	0	0	0	0	0	0	0	0	0	0	0	0	0	0	0	0	0
ZOTU920	0	0	0	0	0	0	0	0	0	0	0	0	0	0	0	0	0	1.72e-05	0	0	0	0.000101133	0.00626698	0.00371224	0.00355991	0	0.000887383	0	0	0	0	0	0	0	0	0	0	0	0	0	0	0	0	0	0	0	0	0	0
ZOTU2711	0	0	0	0	0	1.39e-05	0	0	0	0	0	1.58e-05	0	0	0	0	0	0	0	0	0	6.74e-05	0.000703603	0.00367566	0.00201505	0.00793732	0	0	0	0	0	0	0	0	0	0	0	0	0	0	0	0	0	0	0	0	0	0	0
ZOTU1151	0	0.000334735	0.00708386	0.00365142	0	0	0	0	0	0	0	0	0	0	0	0	0	0	0	0	0	0.000202265	0	0	3.36e-05	0	0	0	0	0	0	0	0	0	0	0	0	0	0	0	0	0	0	0	0	0	0	0	0
ZOTU2130	1.33e-05	2.09e-05	0.00213852	0.00415675	0	0	0	0	0	0	0	0	0	0	0	0	0	0	0	0	0	0.000252832	0.00183264	0.000365738	0.000436593	0.0010948	0	0	0	0	0	0	0	0	0	0	0	0	0	0	0	0	0	0	0	0	0	0	0
ZOTU2077	0	0	0	0	0	0	0	0	0	0	0	0	0	0	0	0	0	0	0	0	0	0	1.64e-05	0.000676615	0	0	0.00939819	0	0	0	0	0	0	0	0	0	0	0	0	0	0	0	0	0	0	0	0	0	0
ZOTU315	0	0	0	0	0	0	0	0	0	0	0	0	0	0	0	0	0	0	0	0	0	0	0	0	0	0	0	0	0	0	0	0	0	0	0	0	0	0	0	0	0	0	0	0	0	0.0299507	0.011426	0	0
ZOTU12438	0	4.18e-05	0	0	0.00170545	0.000431755	0	1.73e-05	0	0	0	0	0	0	0	0	0	0.00020615	0	0	0	0	4.91e-05	0	0	0	0	0.00338135	0.000706666	0.000902364	2.33e-05	0	0.00320735	0.000387288	0.00228315	0	0	0	0	0	0	0	0	0	0	0	0	0	0
ZOTU1324	0.000146506	0.00102513	0	0	0.0104718	0.0123955	0.00174764	0.000207129	0.000608701	0.000147609	0.000209664	0	0	0	0	0	0.00033865	0.00352173	0.000175832	0	0	0	0	0	0	0	0	0.00341955	0.0110375	0.00642483	0.00195964	0.000911515	0.00489022	0.00131248	0.0123459	0.000612031	0.00172265	0.00114233	0.000207173	6.65e-05	0	0	0	0	0	0	0	0	0
ZOTU9697	0	2.09e-05	0	0	0.0113484	0.00764624	0.000327683	0.000310693	5.71e-05	0	0	0	0	0	0	0	3.39e-05	0.000326404	0	0	0	0	0	0	0	0	0	0.000936079	0.00316317	0.00131745	0.000139974	6.75e-05	0.00483082	0.00146309	0.010993	0.000138201	0.000107666	0	4.6e-05	0	0	1.87e-05	0	0	0	0	0	0	0
ZOTU2785	4e-05	8.37e-05	0	0	0.000637552	0.00153203	6.55e-05	0.000103564	0.000247285	1.64e-05	5.59e-05	0	0	0	0	0	5.08e-05	0.00111665	2.2e-05	0	0	0	1.64e-05	0	0	0	0	0.000649524	0.0021873	0.00185887	0.000699872	0.000405118	0.00186105	0.000968221	0.00517938	0.000315887	0	0	0.000161134	0.000132985	0	0	0	0	0	0	0	0	0
ZOTU5601	2.66e-05	0.000125526	0	0	0.00387313	0.00168524	0	0	0	1.64e-05	0	0	0	0	0	0	3.39e-05	0.000257688	0.000175832	0	0	0	0	0	0	0	0	0.000802354	0.00318	0.00106479	0.000163303	0.000202559	0.000673147	0	0.000232543	7.9e-05	0	0	0	0	0	0	0	0	0	0	0	0	0
ZOTU1293	0	0	0	0	0	1.39e-05	0	0	0	0	0	0	0	0	0	0	0	0	0	0	0	0.00348908	0.0186537	0.0160376	0.00769076	0.0360943	0.0237577	0	0	0	0	0	0	0	0	0	0	0	0	0	0	0	0	0	0	0	0	0	0
ZOTU6953	0	0	0	0	0	0	0	0	0	0	0	0	0	0	0	0	0	0	0	0	0	0	0	0	0	3.42e-05	0	0	0	0	0	0	0	0	0	0	0	0	0	0	0	0	0	0	0	0.000571851	0	9.18e-05	0.000278291
ZOTU11482	0	0	0	0	0	0	0	0	0.000152175	0	0	0	0	0	0	0	0	0	0	0	0	0	0	0	0	0	0	0	0	1.8e-05	0	0	0	0	0	1.97e-05	0	0	0.000345288	0.000576267	0.00149309	0.00421554	0.00470351	0.00582495	0.00466639	0.00378851	4.9e-05	0.00372532	0.0122051
ZOTU504	0	0	0	0	0	0	0	0	0	0	0	0	0	0	0	0	0	0	0	0	0	8.43e-05	0.00207808	0.0111733	0.00251881	0.0084163	0.00697806	0	0	0	0	0	0	0	0	0	0	0	0	0	0	0	0	0	0	0	0	0	0
ZOTU5015	0	0	0	0	0	0	0	0	0	0	0	0	0	0	0	0	0	0	0	0	0	0	0	0	0	0	0	0	0	0	0	0	0	0	0	0	0	0	0	0	0	0	0	0	0	0.0146775	0.00122597	1.84e-05	0.00383644
ZOTU10986	1.33e-05	0	0	0	0	0	0	0	9.51e-05	0	0	0	0	0	0	0	0	0	0	0	0	0	0	0	0	0	0	0	0	0	0	3.38e-05	0	0	0	1.97e-05	0	0	0.000391326	0.000243805	0.00069541	0.000168621	9.52e-05	1.51e-05	1.74e-05	2.38e-05	0.0168694	3.67e-05	0
ZOTU3829	0	0	0	0	0	0	0	0.000742211	0.00197828	0	0	0	0	0	0	0	0	0	0	0	0	0	0	0	0	0	0	0	3.37e-05	0.000108284	0.000139974	0.000742716	0	0.000258192	2.11e-05	9.87e-05	0	3.68e-05	0.00382119	0.0020391	0.00272028	0.00129276	0.0010283	0.000196687	1.74e-05	0	0	0.000128459	7.95e-05
ZOTU2772	0	0	0	0	0	0	0	0	0	0	0	0	0	0	0	0	0	0	0	0	0	0	0	0	0	0	0	0	0	0	0	0	0	0	0	0	0	0	0	0	0	0	0	0	5.22e-05	0.00197765	0	0.00330324	0.00413461
ZOTU1281	0	0	0	0	0	0	0	0	0	0	0	0	0	0	0	0	0	0	0	0	0	0	0	0	0	0	0	0	0	0	0	0	0	0	0	0	0	0	0	0	0	0	0	0.000499281	0.00532804	0.000953084	0	0.00390883	0
ZOTU5455	0	0	0	0	0	0	0	0	0	0	0	0	0	0	0	0	0	0	0	0	0	0	0	0	0	0	0	0	0	0	0	0	0	0	0	0	0	0	0	0	0	0	0	0.000272335	0.00111436	0.00183469	0.00201059	3.67e-05	0.00308108
ZOTU2840	0	0	0	0	0	0	0	0	0	0	0	0	0	0	0	0	0	0	0	0	0	0	0	0	0	0	0	0	0	0	0	0	0	0	0	0	0	0	0	0	0	0	0	0	0	0.00586147	0.00125049	0	0.00113304
ZOTU11449	0	0	0	0	1.59e-05	0	4.37e-05	0.000396997	0.000760876	0	0	0	0	0	0	0	0	0	0	0	0	0	0	0	0	0	0	1.91e-05	1.68e-05	0.000180473	2.33e-05	0.000641437	0	0	0	0.000157944	0	0.000368494	0.00085171	0.00197261	0.00198396	0.000599543	0.000590319	0.000983433	1.74e-05	0	0	0.000165162	0.000337925
ZOTU257	0	0.000167368	0	0	0	0	0	0	0	0	0	0	0	0	0	0	0	0	0	0	0	0	0	0	0	0	0	0	0	0	0	0	0	0	0	0	0	0	0	0	0	0	0	0	0	0	0.000980777	0	0
ZOTU543	0	0	0	0	0	0	0	0	0	0	0	0	0	0	0	0	0	0	0	0	0	0	0	0	0	0	0	0	0	0	0	0	0	0	0	0	0	0	0	0	0	0	0	0	0	0	0.00426638	0	0
ZOTU705	0	6.28e-05	5.35e-05	0	0	0	0	0	0	0	0	0	0	0	0	0	0	0	0	0	0	0	0	0	0	0	0	0	0	0	0	0	0	0	0	0	0	0	0	0	0	0	0	0	0	0	0	0	0
ZOTU13562	0	8.37e-05	0.00363549	0.00127148	0	0	0	0	0	0.00134488	0.000740813	0.00189973	0.000650998	0	0	0	0	0	2.2e-05	0.00024146	0.0175384	0	0	0	0	0	0	0	0	0	0	0	0	0	0	0	0	0	0	0	0	0	0	0	0	0	0	0	0
ZOTU1155	0	0	0	0	0	0	0	0	0	0	0	0	0	0	0	0	0.00242135	0.0170761	8.79e-05	0	0	0	0	0	0	0	0	0	0	0	0	0	0	0	0	0	0	0	0	0.000110821	0.000593144	0.000730693	0.000304681	0	0	0	0	0	0
ZOTU6048	0	0	0	0	1.59e-05	0.000389972	0.00043691	0.00205403	0.000875007	0	0	0	0	0	0	0	0	0	6.59e-05	0	0	0	0	0	0	0	0	0	6.73e-05	0.000144378	0.00118978	0.0031059	0	0	0	0.000394859	0	0	0.000713595	0.0022829	0.00308844	0.0007869	0.000171383	0	0	0	0	0	0
ZOTU702	0	0	0	0	0	0	0	0	0	0.000934855	0.000433306	0.0039261	0.010416	0	0	0	0	0	0	0	0	0	0	0	0	0	0	0	0	0	0	0	0	0	0	0	0	0	0	0	0	0	0	0	0	0	0	0	0
ZOTU877	6.66e-05	0.000167368	0	0	0	0	0	0	0	0	0	0	0	0	0	0	0	0.000395121	0.0127918	0.00107947	0	0	0	0	0	0	0	0	0	0	0	0	0	0	0	0	0	0	0	0	0	0	0	0	0	0	0	0	0
ZOTU1435	0	0	0	0	0	0	0	0	0	0	0	0	0	0	0	0	0	0	0	0	0	3.37e-05	0.000670877	0.00149953	0.00134336	0.00790311	0	0	0	0	0	0	0	0	0	0	0	0	0	0	0	0	0	0	0	0	0	0	0
ZOTU9287	0	0	0	0	0	0	0	0	0	0	0	0	0	0	0	0	0	0	0	0	0	0	0	0	0	0	0	0	0	0	0	0	0	0	0	0	0	0	0	0	0	0	0	0	0	0	0.000465869	0	0
ZOTU5988	5.33e-05	0.00023013	2.67e-05	0	0.000510041	0.00144847	0.0014855	0.000586865	0.000209241	0	0	0	0	0	0	0	0	0.000257688	4.4e-05	0	0	0	0	0	0	0	0	0.000152829	0.000588889	0.000559466	0.00125977	0.000607677	7.92e-05	0.000408804	0.000211403	1.97e-05	0.000516796	0.00130815	4.6e-05	0	0	0	0	0	0	0	0	0	0
ZOTU668	1.33e-05	0	0	0	0	0	0	0	0	0.00531391	0.00124401	0.00224801	0.00653243	0	0	0	0	0	0	0	0	0	0	0	0	0	0	0	0	0	0	0	0	0	0	0	0	0	0	0	0	0	0	0	0	0	0	0	0
ZOTU10652	0.000293013	4.18e-05	0	0	0.000812879	0.000821727	0.0014418	0.000189868	0.000247285	4.92e-05	0	0	0	0	0	0	0.00054184	0.000429479	8.79e-05	0	0	1.69e-05	3.27e-05	0	0	0	0	0.000305659	0.000538412	0.000577513	0.00193631	0.000675197	0.000217783	0.00043032	4.23e-05	0.000730489	0.000301464	0.000184247	0	0.000110821	0	1.87e-05	0	0	0	0	0	0	0
ZOTU6201	0.00165153	0.00554405	0	0	0.00510041	0.00654596	0.002687	0.00300337	0.0030435	0.00144329	0.00058706	0.00106068	0.0050284	0	0	0	0.00216736	0.0037966	0.00101103	1.42e-05	5.48e-05	8.43e-05	4.91e-05	0	0	0	0	0.00269362	0.00323047	0.00227396	0.00240289	0.00303838	0.00425667	0.00903673	0.00446061	0.00941739	0.0112618	0.00843851	0.00637632	0.0074693	0.00632005	0.0132649	0.00487489	0.00541645	8.71e-05	0	0	0.00110108	0
ZOTU9946	4e-05	8.37e-05	0	0	0.00651897	0.00686629	0.00111412	0.000224389	0.000152175	4.92e-05	6.99e-05	0	0	0	0	0	0.000152393	0.000188971	8.79e-05	0	0	0	3.27e-05	0	0	0	0	0.0102014	0.0164216	0.0153582	0.00692873	0.000573917	0.00536538	0.00122641	0.00198719	0.000157944	0	0.000184247	9.21e-05	8.87e-05	0	0	0	0	0	0	0	0	0
ZOTU11996	0	0.000355656	0	0	1.59e-05	0	2.18e-05	0.00191594	0.00294839	0	0	0	0	0	0	0	0	0	0.000571454	0.000170442	0.0137202	0	0	0	0	0	0	3.82e-05	1.68e-05	0.000378993	0.000606555	0.00266703	0	0	2.11e-05	0.0011056	0.000215332	0.00215569	0.00329175	0.00480961	0.00327252	0.00384082	0.00298968	0.00431198	0.00153225	0.00033358	0	0.00341334	0.00168963
ZOTU6030	0.000665939	0.00163183	0	0	0.00181702	0.00200557	0.000699056	0.00120825	0.000855985	0.000721643	0.000125798	0	0	0	0	0	0.000694233	0.0013228	0.000285727	0	0	0.000117988	4.91e-05	0	0	0	0	0.00057311	0.000454285	0.000505324	0.00025662	0.00124911	0.00144529	0.000753061	0.0014164	0.00240864	0.00206718	0.00337172	0.00105888	0.0014185	0.00235212	0.00687601	0.00257074	0.0022392	0.000174119	0	0	0.000678999	0
ZOTU570	0	0	0	0	0	0	0	0	0	0	0	0	0	0	0	0	0	0	0	0	0	0	0	0	0	0	0	0	0	0	0	0	0	0	0	0	0	0	0.000253211	0.000953056	0.000224986	0.000224829	0.000285638	0.000196687	0	0	0.0172372	0.000201864	1.99e-05
ZOTU8596	0	0	0	0	4.78e-05	0.000849582	0.00312391	0.00246828	0.00252991	0	0	0	0	0	0	0	0	1.72e-05	2.2e-05	0	0	0	0	0	0	3.42e-05	0	0	8.41e-05	0.000324851	0.00202963	0.00216063	0	0.000451836	4.23e-05	0.00159918	0.00116279	0.00167665	0.00151927	0.00183962	0.00128855	0.00103046	0.00022851	0.000938044	3.48e-05	0	0	0.000110108	0.000139146
ZOTU1699	0	0	0	0	0	0	0	0	0	0	0	0	0	0	0	0	0	1.72e-05	0	0	0	0.00692759	0.0137939	0.00175554	0.00188071	0	0	0	0	0	0	0	0	0	0	0	0	0	0	0	0	0	0	0	0	0	0	0	0
ZOTU2972	1.33e-05	0	0	0	0.00117947	0.00135097	0.00222824	0.00129455	0.000608701	0	0	0	0	0	0	0	0	6.87e-05	6.59e-05	0	0	0	0	0	0	0	0	0.000477591	0.00127873	0.00140769	0.00219293	0.00182303	0.000217783	0.000559416	0.000317105	0.000987147	0.000387597	0.000239521	0.000207173	0.000310297	0.000102266	1.87e-05	0	1.51e-05	0	0	0	9.18e-05	0
ZOTU8289	0	2.09e-05	0	0	0	0	0	0.000604125	0.000951095	0	0	0	0	0	0	0	0	0	2.2e-05	0	0	0	0	0	0	0	0	1.91e-05	1.68e-05	0.000360946	0	0.000810236	1.98e-05	0	0	0.000177687	0	0	0.00211777	0.000908728	0.000961302	0.00179863	0.00220893	0.00231485	0.000696476	0	0	0.00069735	0.000238535
ZOTU1135	0	6.28e-05	0	0	0.000510041	0.00119777	0.00259962	0.000932079	0.000361416	0	0	0	0	0	0	0	0	5.15e-05	0	0	0	0	0	0	0	0	0	0.000592213	0.000454285	0.000830175	0.00153972	0.00148543	0.000178186	0.00109732	0.0010993	0.000848947	2.15e-05	0.000663289	0	0	0	0	0	0	0	0	0	0	0
ZOTU11360	0	2.09e-05	0	0	0.000669429	0.00086351	0.000458756	0.000828515	0.00119838	0	0	0	0	0	0	0	0	0	0	0	0	0	0	0	0	0	0	0.000171933	0.000487936	0.000703844	0.00149306	0.00145167	5.94e-05	0.000193644	0.000359385	0.000375116	0.00258398	0.00204514	9.21e-05	8.87e-05	0.000224986	0	0	0	0	0	0	1.84e-05	0
ZOTU8825	4e-05	0.000376577	0	0	4.78e-05	0.0004039	0.00063352	0.00177785	0.00154077	0	0	0	0	0	0	0	0	0.000137433	0.000395622	0	0	0	0	0	0	0	0	5.73e-05	0.000100952	0.000324851	0.000909833	0.00128287	3.96e-05	0	0.000232543	0.000710746	0	0.00215569	0.000897749	0.0008644	0.000245439	0.000149886	9.52e-05	0.000151297	0	0	0	3.67e-05	0
ZOTU13690	1.33e-05	0.000125526	0	0	0.001562	0.000626741	0.00155103	0.000828515	0.000437504	8.2e-05	0	0	0	0	0	0	0.000118528	0.000103075	0.000131874	0	0	6.74e-05	0	0	0	0	0	0.000534902	0.00137968	0.00101065	0.00130643	0.000877756	0.00051476	0.000451836	0.000211403	5.92e-05	0.000322997	0.000110548	0.000230192	0.000155149	0	0	1.9e-05	6.05e-05	0	0	0	0	0
ZOTU1882	1.33e-05	0	0	0	3.19e-05	1.39e-05	0	0	0	0	0	0	0.0116955	0	0	0	0	0	0	0	0	0	0	0	0	0	0	0.000114622	0	0	0	0	7.92e-05	0	4.23e-05	0	0	0	0	0	0	0	0	0	0	0	0	0	0
ZOTU2774	0	2.09e-05	0	0	0	0	0	0	0	0	0	0	0	0	0	0	0	0	0	0	0	0	0	0	0	0	0	0	0	0	0	0	0	0	0	0	0	0	0	0	0	0	0	0	0	0	0.0040457	0	0
ZOTU1388	0	2.09e-05	0	0	3.19e-05	0.000278552	0.000939357	0.000258911	0.00039946	0	0	0	0	0	0	0	0	0	6.59e-05	0	0	1.69e-05	0	0	0	0	0	0.000114622	0.00043746	0.000324851	0.00221626	0.00195807	1.98e-05	0	8.46e-05	0.000355373	0.00148579	0.00208199	0.000345288	0.000110821	4.09e-05	0	0	4.54e-05	3.48e-05	0	0	0	0
ZOTU1017	0	0	0.00205833	0.00922636	0	0	0	0	0	0	0	0	0	0	0	0	0	0	0	0	0	0	1.64e-05	0	0	0	0	0	0	0	0	0	0	0	0	0	0	0	0	0	0	0	0	0	0	0	0	0	0
ZOTU1110	0.000226419	0.000313814	0	0	0.000605674	0.000710306	4.37e-05	0.000224389	0.00039946	0.000295217	0.000181709	0	0	0	0	0	0.00020319	0.000343584	0.000197811	0	0	1.69e-05	0	0	0	0	0	0.000114622	0.000134603	0.00019852	7e-05	0.000236319	0.000277178	0	0.000465087	0.000592288	0.00131352	0.00173192	0.000621518	0.000132985	0.000388612	0.000243564	0	3.03e-05	0	0	0	0	0
ZOTU3978	0	4.18e-05	0	0	0	0.000153203	0.000524292	0.000983861	0.000684788	0	0	0	0	0	0	0	0	0	0	0	0	0	0	0	0	0	0	3.82e-05	0.000134603	0.000252662	0.000723201	0.000810236	1.98e-05	0.000172128	0.000274824	0.00067126	0.000990525	0.00198987	0.000207173	8.87e-05	2.05e-05	1.87e-05	0.000285638	0.000226946	3.48e-05	0	0	0.000678999	0
ZOTU867	0.244786	0.0372393	0.00184448	0.0033417	0.000191266	0.000153203	0	0	7.61e-05	0.134816	0.128804	0.123767	0.153366	0	0.366834	0	0.123336	0.0216114	6.59e-05	0	0.000529806	0.00876483	0.00281441	5.49e-05	0	0	0	5.73e-05	6.73e-05	0.000469229	0.000956491	0	0.000296977	0.000129096	0.000169122	0	0.00251938	0.00086596	0.000713595	4.43e-05	0	1.87e-05	0	1.51e-05	0	0	2.45e-05	0	0
ZOTU3354	4e-05	0.000292893	0	0	0	0	0	0	0	0.0662435	0.0964735	0.0388494	0.0369722	0.104072	0.0553079	0.15658	0	0	0	0	0	0	0	1.83e-05	0	0	0	0	0	0	0	0	0	2.15e-05	2.11e-05	3.95e-05	0	0	0	0	2.05e-05	0	0	0	0	0	0	0	0
ZOTU344	0.113289	0.0458587	0.00147023	0.000570534	1.59e-05	0	0	0	0	0.00186971	0.000167731	0	0	0	0	9.95e-05	0.000118528	0.000687167	0.000637391	0	0	0.214014	0.0159538	0.000402311	0	0	0	0	0	3.61e-05	0	0	0	0	0	1.97e-05	0	0	0	2.22e-05	0	0	1.9e-05	0	0	0	0	0	0
ZOTU966	0.000173144	2.09e-05	0	0	0.000111572	2.79e-05	0	8.63e-05	1.9e-05	3.28e-05	8.39e-05	0	0	0	0	0	3.39e-05	0	0	0	0	0.00414644	0.0331021	0.00405969	0.00285465	0.0040713	0	0.000267451	8.41e-05	0.000306804	0	3.38e-05	7.92e-05	0	8.46e-05	0	0	0	2.3e-05	0	0	0	1.9e-05	0	0	0	0	0	0
ZOTU289	0	0	0.129247	0.00909595	0	4.18e-05	2.18e-05	0	0	6.56e-05	0	0	0	0	0	0	0	3.44e-05	0	0	0	0.0272553	0.0323003	0.0184149	0.0258262	0.0514215	0.04808	0	0	0	0	0	0	0	0	0	0	1.84e-05	0	0	0	0	0	0	0	0	0	0	0
ZOTU2830	1.33e-05	0	0	0	0	0	0	0	0	0.122056	0.0892191	0.0160369	0.0407884	0.0447001	0.0147136	0	1.69e-05	0.00151177	0	0	0	0	0	0	0	0	4.03e-05	0	0	1.8e-05	0	0	0	0	0	0	0	0	0	0	0	0	0	1.51e-05	0	0	0	0	0
ZOTU4896	7.99e-05	0.00135986	0.0238713	0.000537932	0	0	0	0	0	1.64e-05	0	0	0	0	0	0	0	3.44e-05	0	0	0	0.185326	0.0374219	0.0026516	0.00530629	0.00451606	0	0	0	0	0	0	0	0	0	0	0	0	0	0	0	0	0	0	0	0	0	0	0
ZOTU11454	5.33e-05	0.000167368	0	0	0.000318776	0.000752089	0	0	0	0.00373942	0.00357827	0.010116	0	0	0	0	0.00013546	0.000240509	0.000109895	0	0	0.0145125	0.118042	0.0101309	0.00486969	0.0224093	0	7.64e-05	0.000100952	0.00059556	0.000676543	0	0.00186105	0.00299073	0.0120711	0	0.000645995	0	0	0	0	0	0	3.03e-05	0	0	0	0	0
ZOTU3512	0.000532751	0.000774075	0	0	0.00792158	0.0183983	0.030256	0.0189695	0.00241578	4.92e-05	8.39e-05	0	0	0	0	0	0.0020319	0.00111665	6.59e-05	0	0	0.00092705	0.00022908	0	0	0	0	0.00699194	0.0204765	0.0155568	0.0220226	0.0140441	0.00491002	0.00722938	0.00505253	0.0064362	0.00917313	0.00530631	0.000207173	6.65e-05	0	0	0	0	0	0	0	0	0
ZOTU3164	0.000119869	0.000125526	0	0	0.00243864	0.0114763	0.0177386	0.0126003	0.00810333	0.000147609	0.000111821	0	0	0	0	0	0.00020319	0.000566913	0.000109895	0	0	1.69e-05	0	0	0	0	0	0.00427922	0.013107	0.00882512	0.0148839	0.0123561	0.00241541	0.013383	0.0127899	0.0238297	0.0166667	0.0213358	0.000483403	0.00037679	8.18e-05	7.49e-05	7.62e-05	1.51e-05	0	0	0	0	0
ZOTU310	0.00054607	0.00023013	0	0.000929156	0	0	0	0	0	0.000328019	0.000111821	0	0	0	0	0.192415	0.00013546	0.000274867	0	0	0	0	0	0	0	0	0	0	0	0	0	0	0	0	0	0	0	0	0	0	0	0	0	0	0	0	0	0	0
ZOTU11103	0	0	0.000294047	0	0	0	0	0	0	0.00034442	0.0271445	0.000949863	0	0.143169	0	0	0	0	0	0	0	0.000775351	0.00338711	0.00053032	0.000302257	0	0	0	0	0	0	0	0	0	0	0	0	0	0	0	0	0	0	0	0	0	0	0	0
ZOTU985	0.000372926	0.000648549	0	0	0.0188078	0.00516713	0.000240301	0.000448779	0.000171197	4.92e-05	2.8e-05	0	0	0	0	0	0.00177791	0.00111665	2.2e-05	0	0	0.000151699	6.55e-05	0	3.36e-05	0	0	0.0406335	0.0220244	0.020989	0.000373265	0.000472638	0.018373	0.000279708	0.00101473	0.000138201	0.000193798	0.000128973	9.21e-05	0	0	3.75e-05	0	0	0	0	0	0	0
ZOTU999	0.000679257	0.000648549	0	0	0.0166082	0.0116852	0.000502447	0.000224389	0.000133153	0.00016401	0	0	0	0	0	0	0.00125301	0.00133998	0	0	0	6.74e-05	6.55e-05	0	0	0	0	0.0269362	0.0159336	0.0124707	0.000349936	0.000168799	0.0189075	0.00258192	0.00547534	0.000315887	0.000990525	0.00130815	0	0	0	0	0	0	0	0	0	0	0
ZOTU6973	1.33e-05	6.28e-05	0	0	0.00599299	0.000835655	0	0	3.8e-05	1.64e-05	0	0	0	0	0	0	5.08e-05	5.15e-05	0	0	0	0	0	0	0	0	0	0.00918886	0.000706666	0.000938459	0	0	0.00332614	0	0	0	0	0	0	0	0	0	0	0	0	0	0	0	0
ZOTU3839	0.00952292	0.00173644	8.02e-05	0	0.000143449	2.79e-05	0.000109228	0.000120825	0	0.00469068	0.00356429	0.00343534	0.00298561	0	0.046729	0	0.0807511	0.00896753	4.4e-05	0.000142035	0.000237499	0.000522519	0.000196354	0	0	0	0	0.000286555	0.000420635	0.000523371	4.67e-05	3.38e-05	0.000752341	0.00230221	0.000887893	0.000256658	0	0	4.6e-05	0	0	0	0	0	0	0	0	0	0
ZOTU1468	0.0423936	0.0154815	0.000400973	0.0016953	0	1.39e-05	0	0	5.71e-05	0.0165978	0.0195826	0	0	0	0	0	0.0640049	0.00802268	0	0	0.000548075	5.06e-05	9.82e-05	0	0	0	0	0	0	3.61e-05	0.000163303	0	5.94e-05	0	0	0	0	0	0	0	0	0	0	0	0	0	0	0	0
ZOTU4787	0.00359607	0.00441432	5.35e-05	0	0.00133886	0.0111421	0.00908773	0.0126866	0.00618212	3.28e-05	0	0	0	0	0	0	0.00160859	0.0165779	0.00549475	0.000142035	0.000237499	0.00217435	0.00152175	1.83e-05	0	0	0	0.000878768	0.00149746	0.00559466	0.00587892	0.00519901	0.00051476	0.00331347	0.00329789	0.00850921	0.00990525	0.0120497	0.00384421	0.00283701	0.00212714	0.00116161	0.000380851	0.00124064	0	0	0	1.84e-05	3.98e-05
ZOTU3574	0.000719214	0.000167368	0	0	0.00194453	0.00292479	6.55e-05	1.73e-05	1.9e-05	0.000278817	0.000279552	0	0	0	0	0	0.00177791	0.00146023	0	0	0	0.000101133	0	0	0	0	0	0.00380163	0.0055019	0.00472839	0.00186633	3.38e-05	0.00219763	0.00339953	0.00279052	0.000118458	0	0	0	0	0	0	0	0	0	0	0	0	0
ZOTU5876	0	0.000460261	0.125932	0.000374923	0	1.39e-05	0	0	0	0	0	0	0	0	0	0	0	0	0	1.42e-05	0	0	0	0	0	0	0	0	0	0	0	0	0	0	0	0	0	0	0	0	0	0	0	0	0	0	0	0	0
ZOTU6965	0.0113476	0.00644365	8.02e-05	0	0.000207204	0.000473538	0.000283992	0.00046604	0.000760876	0.0149249	0.0108326	0.0123482	0.0369722	0	4.79e-05	0	0.00485963	0.00290328	0.00147259	0	1.83e-05	0.0034048	0.000670877	1.83e-05	0	0	0	0.000382073	0.000353333	0.00079408	0.00531902	0.000708956	7.92e-05	0	0.000190263	0.000710746	4.31e-05	0.0059696	0.0010819	4.43e-05	0	0	0	0	0	0	0	0	0
ZOTU2901	7.99e-05	8.37e-05	0	0	0.00151419	0.00831476	0.0158161	0.0107016	0.00319568	3.28e-05	0	0	0	0	0	0	0.000101595	0.00106511	8.79e-05	0	0	0	0	0	0	0	0	0.00173843	0.00674698	0.00738134	0.0102415	0.00904764	0.00110871	0.00942402	0.00737797	0.0144124	0.00833333	0.00287425	0.000736614	0.000199477	4.09e-05	0	0	0.00057493	0	0	0	0.000403729	0.00155048
ZOTU449	0	0.0008996	0	0	0	0	0	0	0	0.00109887	6.99e-05	0.000443269	0	0	0	0.116166	0	0	0	0	0	0.000303398	0.000147266	5.49e-05	0	0	0	0	0	0	0	0	0	0	0	0	0	0	0	0	0	0	0	0	0	0	0	0	0
ZOTU4675	0.00235742	0.000606707	0	0	0.00223143	0.000431755	0	0	3.8e-05	0.000311618	0.000531149	0	0	0	0	0	0.00316638	0.000807421	0	0	0	5.06e-05	6.55e-05	0	0	0	4.03e-05	0.00149008	0.00107683	0.00135355	0	0	0.00164327	0	0.000317105	0	0	0	0	0	0	0	0	0	0	0	0	0	0
ZOTU11012	0.000705895	0.000271972	0	0	0.00052598	0.000139276	0	0	0	0.000147609	0.000139776	0	0	0	0	0	0.00367435	0.00084178	0	0	0	8.43e-05	1.64e-05	0	0	0	0	0.000764146	0.000841269	0.000721891	2.33e-05	0	0.00112851	0	2.11e-05	0	0	0	0	0	0	0	0	0	0	0	0	0	0
ZOTU5923	0.0345888	0.0189125	0.000721751	0.00244515	4.78e-05	0	0	0	0	0.00656039	0.0051158	0.019393	0	0	0	0	0.00875411	0.00233637	0	0	0	0.00421386	0.00391072	0.000109721	0	0	0	0	1.68e-05	1.8e-05	0	0	0.000554357	0	0.000147982	1.97e-05	0	0	0	0	0	0	0	0	0	0	0	0	0
ZOTU7803	0.00245065	0.000753154	0.000213852	0	1.59e-05	1.39e-05	0	1.73e-05	0	0.00944696	0.00649959	0.00645907	0.0191259	0.050432	0	0	0.00350503	0.00673424	0.000703328	0	0	0	1.64e-05	1.83e-05	0	0	0	0	1.68e-05	5.41e-05	0	0	0	0.00101125	0	0	0	0	0	0	0	0	0	0	0	0	0	0	0
ZOTU1631	1.33e-05	0	0	0	1.59e-05	0.000111421	4.37e-05	0.00826789	0.0184132	0	0	0	0	0	0	0	0	0	0	0	0	0	0	0	0	0	4.03e-05	5.73e-05	3.37e-05	0.00209348	0.00174968	0.00854124	0	0	0.000105702	0.00550828	0.00081826	0.00206356	0.00759634	0.00602864	0.0024953	0.00258553	0.00135202	0.0237688	0.00191531	0.000405061	0	0.00612934	0.00403522
ZOTU4563	0.00278362	0.00110881	8.02e-05	0.000277117	3.19e-05	6.96e-05	0.000218455	0	0	0.00118087	0.00116014	0	0	0	0.0728493	0	0.0124623	0.00133998	0.000131874	0	0	0.000809061	0.000425434	0	0	0	0	0	3.37e-05	5.41e-05	9.33e-05	6.75e-05	3.96e-05	0.00150612	0.000126842	0.000394859	0	0.000147398	0	0	0	0	0	0	0	0	0	0	0
ZOTU612	0	0	0	0	0	1.39e-05	2.18e-05	0.00429792	0.0115463	0	0	0	0	0	0	0	0	0	0	0	0	0	0	0	0	0	0	0	0	0.000938459	0.000326607	0.00371358	0	0	4.23e-05	0.00130303	0	0.000423768	0.011947	0.0110821	0.0238076	0.00286656	0.00439883	0.00316212	0.00100989	0	0	0.0124055	0.000238535
ZOTU4475	1.33e-05	0.000188288	0	0	0.000892573	0.00240947	0.0053303	0.0066799	0.00391851	8.2e-05	0	0	2.24e-05	0	0	0	0	0.000721526	0.000175832	0	0	0	0	0	0	0	0	0.00166202	0.00375206	0.00418697	0.010638	0.0135377	0.000673147	0.00165673	0.00295964	0.0105032	0.00768734	0.00878858	0.00345288	0.00177313	0.000838583	0.000206093	0	3.03e-05	0	0	0	0	0
ZOTU12831	4e-05	0.000292893	0	0	0.00310807	0.0138162	0.0128889	0.00414257	0.00070381	4.92e-05	0	0	0	0	0	0	5.08e-05	0.000309225	0.000153853	0	0	0	0	0	0	0	0	0.00322852	0.0127705	0.0101245	0.00968156	0.0042875	0.00106912	0.00464746	0.00247342	0.00229018	0.00310078	0.00125288	2.3e-05	0	0	0	0	0	0	0	0	1.84e-05	0
ZOTU2661	0.00010655	2.09e-05	0	0	7.97e-05	6.96e-05	0.000109228	1.73e-05	0.000171197	0.000180411	0	0	0	0	0	0	8.47e-05	5.15e-05	0	0	0	1.69e-05	0	0	0	0	0	5.73e-05	1.68e-05	3.61e-05	7e-05	0	0.0123542	0.0256901	0.0291736	0.000197429	0	0	0	0	0	0	0	0	0	0	0	0	0
ZOTU5089	0.000399563	0.000188288	0	0	0.00199235	0.0051532	0.00166026	0.000431518	0.000247285	9.84e-05	8.39e-05	0	0	0	0	0	0.00027092	0.00146023	4.4e-05	0	0	0	0	0	0	0	0	0.00212051	0.00651142	0.00628045	0.00314942	0.00199183	0.00582075	0.0184392	0.0162992	0.00284298	0.000495263	0.000460617	0	0	0	0	0	0	0	2.38e-05	0	0	0
ZOTU2658	0.000133188	0.000355656	0	0	0.00264584	0.00483287	0.0019661	0.000345214	1.9e-05	0.000131208	4.19e-05	0	0	0	0	0	0.000186258	0.00185535	6.59e-05	0	0	0	1.64e-05	0	0	0	0	0.00149008	0.0085473	0.00498105	0.00230958	0.00280207	0.00562276	0.0203542	0.0156438	0.00102663	0	1.84e-05	0	0	0	0	0	0	0	0	0	0	0
ZOTU2601	0.00424869	0.00115065	0	0	4.78e-05	0.000153203	0.00253408	0.00296884	0.00213045	0	0	0	0	0	0	0	0.0143757	0.0261295	0.0136929	0.000596549	0	0	0	0	0	0	0	1.91e-05	0	0.000685797	0.00142307	0.00293711	1.98e-05	0.00021516	6.34e-05	0.000138201	0.000387597	0.000202672	0.000253211	0.000288133	0.000388612	5.62e-05	0	0	0	0	0	0	0
ZOTU5341	0.000306332	0.000711312	0	0	0.0012751	0.00518106	0.00731825	0.00131182	0.000133153	0.000180411	4.19e-05	0	0	0	0	9.95e-05	0.000253988	0.00273149	0.000263748	0	0	1.69e-05	1.64e-05	0	0	0	0	0.00170023	0.00380254	0.00279733	0.00508573	0.00421998	0.0012473	0.0112959	0.0067649	0.00846972	0.00562015	0.00193459	4.6e-05	4.43e-05	0	0	0	0	0.00141036	0	0	0	0
ZOTU685	1.33e-05	0.000125526	0	0	0.00243864	0.00571031	0.0116	0.00731855	0.00308155	1.64e-05	0	0	0	0	0	0	3.39e-05	3.44e-05	0	0	0	1.69e-05	1.64e-05	0	3.36e-05	0	0	0.00179574	0.00511492	0.00418697	0.00809518	0.007731	0.000811737	0.00258192	0.00213517	0.00398807	0.00322997	0.0031322	0.000115096	2.22e-05	0	0	0	0	0	0	0	0	0
ZOTU5085	0.000119869	0.000188288	0	0	0.00999362	0.00222841	0.00126704	0.00139812	0.000551635	0.000131208	5.59e-05	0	0	0	0	0	3.39e-05	0.000463838	2.2e-05	0	0	1.69e-05	0	0	0	0	0	0.00861575	0.0107346	0.00781447	0.00396594	0.00162047	0.0077214	0.00423866	0.00344587	0.00114509	0.00368217	0.00222939	4.6e-05	0	0	0	0	0	0	0	0	0	0
ZOTU202	0.000186463	0.000523023	0	0	0.000701307	0.00272981	0.00810468	0.00509191	0.00203534	1.64e-05	0	0	0	0	0	0	0.000524908	0.000549734	4.4e-05	0	0	0.000505663	0.000147266	0	0	0	0	0.000439384	0.00143016	0.00137159	0.010638	0.00489518	0.000712744	0.00453988	0.00623639	0.00456062	0.0116925	0.00316905	0.000138115	0	0	1.87e-05	0	0	0	0	0	0	0
ZOTU572	0.00352947	0.00336827	0.000106926	0	0.000286898	0.00168524	0.00321129	0.0020195	0.00173099	0	8.39e-05	0	0	0	0	0	0.00189644	0.00877856	0.000131874	0	0	0.000842772	0.000163629	0	0	0	0	0.000286555	0.000353333	0.00115503	0.00240289	0.0034435	0.000118791	0.00316286	0.00209289	0.00331681	0.00480189	0.00547213	0.00451176	0.00609513	0.00239303	0.00211714	7.62e-05	6.05e-05	0	0	0	0	0
ZOTU14358	6.66e-05	0.00023013	0	0	0.00052598	0.000431755	4.37e-05	0	0.000114131	0.000147609	0	0	0	0	0	0	0.000186258	0.00195843	0.000923117	0	0	3.37e-05	1.64e-05	0	0	0	0	0.00252168	0.00114413	0.00191301	0.0027295	0	0.00114831	0.000236676	0.000359385	5.92e-05	0	0	0	0	0	0	0	0	0	0	0	0	0
ZOTU1618	0.000253057	0.00106697	0	0	0.00683774	0.00197772	0.00141996	0.00270993	0.00070381	0.00016401	0.000251597	0	0	0	0	0	0.000186258	0.00120254	0.000373643	0	0	8.43e-05	6.55e-05	0	0	0	0	0.0187216	0.00985968	0.00584732	0.0012831	0.00131663	0.0114039	6.45e-05	0.000422806	0.000612031	0	0.000147398	2.3e-05	0	0	0	0	0	0	0	0	0	0
ZOTU5008	0.000146506	8.37e-05	0	0	0.00299649	0.00664345	0.00893481	0.00445327	0.000608701	0	0.000153754	0	0	0	0	0	0.000440245	0.000137433	0	0	0	0.000606796	8.18e-05	0	0	0	0	0.00340045	0.00785745	0.00519762	0.00832847	0.00415246	0.00156408	0.00324892	0.00196605	0.00183609	0.00230405	0.00101336	4.6e-05	0.000155149	0	0	0	0	0	0	0	0	0
ZOTU4513	0	0	0	0	0	0	0	0	0	0	0	0	0	0	0	0	0	0	0	0	0	0	0	0	0	0	0	0	0	0	0	0	0	0	0	0	0	0	0	0	0	0	0	0	0.00398732	2.38e-05	0.0418056	0.00113778	0.000198779
ZOTU1547	0.00203777	0.000460261	0	0	0.00253427	0.00388579	0.00176949	0.000362475	0.000342394	0.000180411	2.8e-05	0	0	0	0	0	0.00150699	0.00554887	8.79e-05	0	0	3.37e-05	3.27e-05	0	0	0	0	0.00504337	0.00597301	0.00462011	0.00321941	0.000641437	0.00425667	0.00985434	0.0112889	0.00108586	0	5.53e-05	4.6e-05	2.22e-05	0	0	0	0	0	0	0	0	0
ZOTU4222	0.00123865	0.00104605	0	0	0.00153012	0.00462395	0.00478417	0.00617934	0.00127447	1.64e-05	0	0	0	0	0	0	0.00101595	0.00365916	0.00153853	0	0.000182692	0.000168554	0.00022908	0	0	0	0	0.00124174	0.00339873	0.0046562	0.00557564	0.0046251	0.000316775	0.0014846	0.0027271	0.00274427	0.00286391	0.00362966	0.00188757	0.000842236	0.000634051	0.00013115	0.00015234	6.05e-05	0	0	0	0	0
ZOTU4579	0	0	0	0	0.000223143	0.00346797	0.00170395	0.00818158	0.00836963	0	0	0	0	0	0	0	0	0	0.00021979	0	0	0	0	0	0	0	0	0.000305659	0.00129556	0.00445768	0.00944827	0.00759596	5.94e-05	0	0.000274824	0.00313913	0.00159345	0.00576693	0.00142719	0.00075358	0.000797677	7.49e-05	0	6.05e-05	0	0	0	0	0
ZOTU11550	1.33e-05	0	0	0	0.000685368	0.000348189	0	0	1.9e-05	1.64e-05	0	0	0	0	0	0	5.08e-05	0.000154613	0	0	0	0	0	0	0	0	0	0.00200588	0.00100952	0.00115503	0.00249621	0	0.0051674	0.000623965	0.000993594	0	0	0	0	0	0	0	0	0	0	0	0	0	0
ZOTU1682	0.0061	0.00188288	2.67e-05	0	3.19e-05	0.000153203	0	1.73e-05	1.9e-05	0.00114807	0.00213857	0	0	0	0	0	0.00772122	0.00140869	0	0	0	0.000168554	8.18e-05	0	0	0	0	9.55e-05	0.000185079	0.000577513	0.000279949	0	1.98e-05	0	0	0	0	0	0	0	0	0	0	0	0	0	0	0	0
ZOTU3068	5.33e-05	0.000104605	0	0	0.000653491	0.00169916	0.00384481	0.00334858	0.00214947	3.28e-05	0	0	0	0	0	9.95e-05	0.00013546	0.000395121	0.000109895	0	0	0	0	0	0	0	0	0.000706835	0.00201905	0.00169644	0.00520238	0.0046251	0.000395969	0.00307679	0.00308648	0.00501471	0.00620155	0.0070935	0.00193361	0.000930892	0.000920396	0.000449657	0.000209468	0.000105908	0	0	0	3.67e-05	0
ZOTU1121	0.00491463	0.00441432	0.000427705	0.000407525	0.000111572	4.18e-05	0	0	0	0.00191891	0.00247404	3.17e-05	0.0334703	0	0	0	0.0014054	0.000360763	0	0	0	0.00173611	0.00250352	0.000457172	3.36e-05	0	0	0	1.68e-05	7.22e-05	0	0	0.000277178	0	0.000591929	0	0	0	0	0	0	0	0	0	0	0	0	0	0
ZOTU4940	0.00443515	0.000774075	5.35e-05	0	0	0	0	0	0	0.00721643	0.0107208	0.00706065	0.0176443	0	0	0	0.00380981	0.000515375	0	0	0	0.000337109	0.000245443	0	0	0	0	0	0	1.8e-05	0	0	0	0	0	0	0	0	0	0	0	0	0	0	0	0	0	0	0
ZOTU2863	0.000439519	0.000125526	0	0	0	5.57e-05	0.00113597	0.000293432	0.000380438	0	0	0	0	0	0	0	0.0146297	0.0323828	0.000241769	0.000269867	0.000968266	0	0	0	0	0	0	0	0	0.000144378	0.000233291	0.000135039	0	0	0	0.000118458	0.00081826	0.000184247	4.6e-05	4.43e-05	0	0	0	3.03e-05	0	0	0	0	0
ZOTU2822	0.00727205	0.00144355	0	0	1.59e-05	2.79e-05	0	0	0	0.000902053	0.00116014	0	0	0	9.59e-05	0	0.0339666	0.00396839	0	0	0	0.00141586	0.000196354	0	0	0	0	7.64e-05	0.000151428	9.02e-05	0	3.38e-05	0.000158388	0.00157067	0.000105702	0	0	0	0	0	0	0	0	0	0	0	0	0	0
ZOTU11455	0	0	0	0	0	0	0	0	3.8e-05	0	0	0	0	0	0	0	0	0	0	0	0	0	0	1.83e-05	0	0	0	0	0	0	0	3.38e-05	0	0	0	0	0	0	0	0	0	0	0	0.000121038	0	0.014058	0.000735583	0	0.0292802
ZOTU1558	0	0	0	0	0	0	0	0	0	0.000328019	0.00816292	0.00311872	0.00895683	0.0304988	0	9.95e-05	0	0	0	0	0	0	0	1.83e-05	0	0	0	0	0	0	0	0	0	0	0	0	0	0	0	0	0	0	0	0	0	0	0	0	0
ZOTU9586	0.00110546	0.000523023	0	0	0.00137074	0.000181058	0	3.45e-05	1.9e-05	0.000557633	0.00100639	0	0	0	0	0	0.00282773	0.000481017	0	0	0	8.43e-05	1.64e-05	0	0	0	0	0.00152829	0.00065619	0.00066775	0	0	0.00209864	0.00133399	0.000845612	0	0	0	0	6.65e-05	0	0	0	0	0	0	0	0	0
ZOTU1328	0.000825764	0.000209209	0	0	1.59e-05	0	0	0	0	0.00100046	0.000754791	0.00338785	0	0	0	0	0.00342037	0.000601271	2.2e-05	0	0	1.69e-05	0	0	0	0	0	1.91e-05	1.68e-05	3.61e-05	0	0	0.000376171	0	0	0	0	0	0	0	0	0	0	0	0	0	0	0	0
ZOTU648	0.00201113	0.00135986	0	0	0.0151737	0.0188162	0.0138064	0.00267541	0.000646744	0.000902053	0.000167731	0	0	0	0	0	0.00308172	0.0168871	0.000197811	0	0	0.000168554	4.91e-05	0	0	0	0	0.0078325	0.0100279	0.00658726	0.00758194	0.00273455	0.00702845	0.0384706	0.013107	0.00309964	0.00165805	0	4.6e-05	0	0	0	0	0	0	0	0	0	0
ZOTU1150	0.00744519	0.0021967	0.000106926	0	0.0076825	0.00406685	0.00231562	0.00046604	0.000532613	0.00155809	0.00129992	0	0	0	0	0	0.0186427	0.00604707	6.59e-05	0	0	0.000168554	4.91e-05	0	0	0.00602142	0	0.00703015	0.00607396	0.0053059	0.00163303	0.000843996	0.0101764	0.0150827	0.00851954	0.00236915	0	1.84e-05	0	0	0	0	0	0	0	0	0	0	0
ZOTU2382	0	0	0	0	0	0	0	8.63e-05	0.000342394	0	0	0	0	0	0	0	0	0	0	0	0	0	0	0	0	0	0	0	0	0.000559466	0	0	0	0	0	3.95e-05	0	0	0.00837899	0.0066049	0.0102675	0.00994866	0.0123777	0	0	0	0	1.84e-05	0
ZOTU12725	0.00340961	0.00108789	2.67e-05	0	0.0061205	0.00417827	4.37e-05	3.45e-05	7.61e-05	0.000754445	0.000852634	0	0	0	0	0	0.0124623	0.00422608	8.79e-05	0.000127832	0	0.000219121	9.82e-05	0	0	0	0	0.00242616	0.00412222	0.00306804	4.67e-05	0	0.00152448	0.0021516	0.00281166	3.95e-05	0	0	0	0	2.05e-05	0	0	0	0	0	0	0	0
ZOTU10470	0	0	0	0	0.000191266	0.000738162	0.00334236	0.00533356	0.00306252	0	0	0	0	0	0	0	0	6.87e-05	4.4e-05	0.000369292	0	0	0	0	0	0	0	0.000401177	0.000908571	0.00162426	0.00650881	0.00526653	0.000336574	0.00116186	0.000761051	0.0030799	0.00633075	0.00374021	0.000552461	0.00075358	8.18e-05	1.87e-05	1.9e-05	0	0	0	0	0	0
ZOTU12849	7.99e-05	2.09e-05	0	0	0.00734778	0.00271588	0.000961202	5.18e-05	0	0	0	0	0	0	0	0	0.00187951	0.000343584	0	0	0	0	0	0	0	0	0	0.00309479	0.00617492	0.00398845	0.000933162	0.000135039	0.0038607	0.00905824	0.00367841	0.000177687	0	0	0	2.22e-05	0	0	0	0	0	0	0	0	0
ZOTU9422	0.00138515	0.00066947	8.02e-05	0	0.00211986	0.00192201	0.000458756	6.9e-05	0.000171197	0.000459227	0.000223642	0.000364114	0	0	0	0	0.00120221	0.00187253	8.79e-05	0	0	5.06e-05	6.55e-05	0	0	0	0	0.00324762	0.00511492	0.00261686	0.000373265	0.000135039	0.00328654	0.0170622	0.00515823	0.000355373	0.000495263	0	0	0	0	0	0	0	0	0	0	0	0
ZOTU4450	0	0.000857759	0	0	0	4.18e-05	2.18e-05	0.000293432	0.000646744	0	0	0	0	0	0	0	1.69e-05	5.15e-05	0.000109895	0.000411903	0.00215576	0	0	0	0	0	0	0	5.05e-05	0.000342898	2.33e-05	0.000135039	0	0	0	3.95e-05	0	0	0.00280834	0.00272618	0.0298617	0.0013115	0.000685531	0	0	0	0	0	0
ZOTU16	0	0	0	0	0	0	0	0	0	0	0	0	0	0	0.0306734	0.00308581	0	0	2.2e-05	0	0.000584614	0	0	0	0	0.00632933	0	0	0	0	0	0	0	0	0	0	0	0	0	0	0	0	0	0	0	0	0	0	0
ZOTU2643	1.33e-05	0	0	1.63e-05	0.00259802	0.00144847	0.000262146	0.000673168	0.000114131	1.64e-05	0	0	0	0	0	0	0.000101595	0.000343584	2.2e-05	0	0	0	0	0	0	0	0	0.00414549	0.00913618	0.0036275	0.00226292	0.00138415	0.00390029	0.00518536	0.00433376	0.000256658	0	0	0	8.87e-05	0	0	0	0	0	0	0	0	0
ZOTU1424	0.00594017	0.00150631	2.67e-05	0	0.00181702	0.000947075	2.18e-05	8.63e-05	0	0.00129568	0.00160742	0.00398942	0.00978742	0	0	0	0.0094822	0.00219893	4.4e-05	0	0	0.000117988	4.91e-05	0	0	0	0	0.00168112	0.00149746	0.00151597	0.000163303	0.000168799	0.00134629	0.000731545	0.000634209	0.000118458	0	0	0	0	0	0	0	0	0	0	0	0	0
ZOTU10282	5.33e-05	0.000543944	0	0	0.000510041	0.000543175	6.55e-05	1.73e-05	3.8e-05	0.000541232	0	0	0	0	0	0	0.000152393	0.000858959	0.000263748	0	0	0	0	0	0	0	0	0.00126084	0.000673015	0.00128136	0.00109647	0	0.00817676	0.000989737	0.00217745	5.92e-05	0	1.84e-05	6.91e-05	0.00534155	0	0	0	0	0	0	0	0	0
ZOTU2773	0	0	0	0	0.00251833	0.00196379	0.00146365	0.00024165	0	0	0	0	0	0	0	0	0	0.000103075	0	0	0	0	0	0	0	0	0	0.000592213	0.0019854	0.00166035	0.001843	0.00114783	0.000989923	0.0138563	0.00509481	0.00276401	0.000279931	0.00121603	0	0	0	0	0	0	0	0	0	0	0
ZOTU5083	0.00261048	0.00102513	0	0	0.000223143	9.75e-05	2.18e-05	8.63e-05	0	6.56e-05	0.000559104	0.00115567	0	0	0	0	0.0189644	0.00334994	2.2e-05	0	0	0.00276429	0.00109631	0	0.00141053	0	0	0.000458488	0.00141333	0.000956506	2.33e-05	0	0.000316775	0.000753061	0.000105702	9.87e-05	0	0	0	0	0	0	0	0	0	0	0	0	0
ZOTU3705	0	2.09e-05	0.0178834	0.00192352	0	0	0	0	0	0	0	0	0	0	0	0	0	0	0	0	0	0.00389361	0.00955591	0.00173725	0.00154487	0	0	0	0	0	0	0	0	0	0	0	0	5.53e-05	0	0	0	0	0	0	0	0	0	0	0
ZOTU1829	0.000306332	6.28e-05	0	0	0.00584954	0.00447075	0.00104858	0.000759472	0.000855985	0	0	0	0	0	0	0	0.000761963	0.00237073	6.59e-05	0	0	0	0	0	0	0	0	0.00336224	0.00370158	0.00283342	0.00132976	0.000911515	0.00150468	0.00292618	0.0017335	0.000829204	0.000215332	0.000571165	0	0	0	0	0	0	0	0	0	0	0
ZOTU3682	9.32e-05	2.09e-05	5.35e-05	0	0.00219955	0.00107242	0.000262146	0.000103564	3.8e-05	0.000147609	0	0	0	0	0	0	0.000186258	0.000927676	0	0	0	1.69e-05	0	0	0	0	0	0.0010316	0.00132921	0.000956506	0	3.38e-05	0.000910729	0.00714332	0.000443946	3.95e-05	0	0	0	0	0	0	0	0	0	0	0	0	0
ZOTU13628	0	0	0	0	0	0	0	0	0	0	0	0	0	0	0	0	1.69e-05	0	0	0	0	0	0	0	0	0	0	0	0	0	0	0	0.0157398	0	0.000317105	0	0	0	0	0	0	0	0	0	0	0	0	0	0
ZOTU3527	2.66e-05	2.09e-05	0	0	0.00119541	0.00256267	0.00347344	0.00070769	3.8e-05	0	0	0	0	0	0	0	3.39e-05	8.59e-05	0.000109895	0	0	0	0	0	0	0	0	0.000362969	0.00161524	0.00120917	0.00191298	0.00118159	0.000316775	0.006046	0.00477771	0.00217172	0.00391904	0.00105021	0	0	0	0	0	0	0	0	0	0	0
ZOTU6564	0	0	0.0258761	0.00368402	0	0	0	0	0	0	0	0	0	0	0	0	0	0	0	0	0	8.43e-05	0.000507249	0.000676615	6.72e-05	0.00177906	0	0	0	0	0	0	0	0	0	0	0	0	0	0	0	0	0	0	0	0	0	0	0
ZOTU12067	0.000332969	0.000711312	0	0	0.0016417	0.00415042	0.00222824	0.000517822	0.000266307	0	0	0	0	0	4.79e-05	0	0.00094822	0.000601271	0.000197811	0	0	0.000438242	9.82e-05	0	0	0	0	0.00200588	0.00753777	0.00584732	0.00195964	0.000303838	0.000158388	0.000989737	0.000401666	0.000375116	0	0.000294795	0	0	4.09e-05	0	0	0	0	0	0	0	0
ZOTU660	0	0	0	0	1.59e-05	1.39e-05	4.37e-05	0.00110469	0.00361416	0	0	0	0	0	0	0	0	3.44e-05	0	0	0.000237499	0	0	0	0	0	0	9.55e-05	3.37e-05	0.000631655	0.000163303	0.00114783	0	0	0	0.000908176	0	0.000184247	0.0050412	0.00695953	0.00519512	0.00213587	0.00133298	0.00214842	1.74e-05	2.38e-05	0	0.000678999	0
ZOTU8435	1.33e-05	0	0	0	0.00170545	0.000306407	0	0	0	3.28e-05	0	0	0	0	0	0	3.39e-05	0.000103075	0	0	0	1.69e-05	1.64e-05	0	0	0.00803996	0	0.00183395	0.000319682	0.000523371	0	0	0.00223722	0	0.000169122	0	0	0	0	0	0	0	0	0	0	0	0	0	0
ZOTU2640	0.00237074	0.000564865	0	0	9.56e-05	6.96e-05	0	0	0	0.000377222	0.000391373	0	4.49e-05	0.000299427	0	0	0.019574	0.00231919	0	0.00019885	0.000383653	0.00222492	0.00091632	0.000201156	0	0	0	1.91e-05	0.000100952	0.000144378	7e-05	0	0.000118791	0.000623965	8.46e-05	0	0	0	0	0	0	0	0	0	0	0	0	0	0
ZOTU3062	9.32e-05	0.000188288	0	0	0.00111572	0.00114206	0.000655365	0.000258911	0.000266307	8.2e-05	0	0	0.00868745	0	0	0	3.39e-05	0.00113383	4.4e-05	0	0	0	0	0	0	0	0	0.000229244	0.000740317	0.000451182	0.000163303	0.000270079	0.000574155	0.00163522	0.00477771	0.00033563	0.00391904	0.00429295	6.91e-05	0	0	0	0	0	0	0	0	0	0
ZOTU6167	0	4.18e-05	0	0	3.19e-05	0.000278552	0.000611674	0.00169155	0.00148371	0	0	0	0	0	0	0	0	0	0.000131874	0	0	8.43e-05	1.64e-05	0	0	0	0	5.73e-05	6.73e-05	0.000721891	0.00237956	0.00280207	1.98e-05	0	0.000274824	0.000888433	0.00695521	0.00698296	0.00174946	0.00175096	0.00120674	0.000599543	0.000266596	0	0	0	0	0	1.99e-05
ZOTU2648	0	0	0	0	0	0	0	0	0	0.00403464	0.0178774	0.00457517	0.00439985	0	0	0	0	0	0	1.42e-05	0	0	0	0	0	0	0	0	0	0	0	0	0	0	0	0	2.15e-05	0	0	0	0	0	0	0	0	0	0	0	0
ZOTU5477	4e-05	0	0	0	0.00331527	0.000376045	2.18e-05	0	0	1.64e-05	0.000447283	0	0	0	0	0	3.39e-05	0.000171792	0	0	0	0	0	0	0	0	0	0.003133	0.00127873	0.00086627	2.33e-05	0	0.00340533	0.000193644	0.000317105	0	0	0	0	0	0	0	0	0	0	0	0	0	0
ZOTU5559	0.000293013	0.000543944	0	0	0.000765062	0.00164345	0.00257777	0.00226115	0.0021685	0.000295217	0.000195687	0	0	0	0	0	0.000287853	0.00115101	0.000373643	0	0	1.69e-05	0	0	0	0	0	0.000267451	0.00021873	0.000270709	0.00114312	0.00253199	0.000237581	0	0.000507367	0.00270478	0.00305771	0.00235836	0.00170342	0.000953056	0.000674957	0.000543336	0.00022851	0.000181557	6.96e-05	0	0	0.000165162	0
ZOTU2468	6.66e-05	0.000481182	0	0	0.00580172	0.00175487	0.000895666	0.000655907	0.000475547	6.56e-05	0	0	0	0	0	0	0.000118528	0.000738705	0.000109895	0	0	0	0	0	0	0	0	0.0073358	0.00230508	0.00245443	0.000816517	0.000675197	0.00302916	0.000365772	0.000253684	0.000315887	0.000366064	0.000405343	0.000736614	0.000110821	0	0	0	0	0	0	0	0	0
ZOTU10752	0.00495458	0.00315906	0.000106926	0	0.00111572	0.00111421	0	0	0	0.00319819	0.00254392	4.75e-05	0	0	0	0	0.00094822	0.000257688	0	0	0	0.00441613	0.00469614	0.000420598	0.000705266	0	0	0	0.000134603	0.000757986	0.000419923	0	9.9e-05	0	0	3.95e-05	0	0	0	0	0	0	0	0	0	0	0	0	0
ZOTU541	0.00438188	0.000648549	0	0.000717243	0	4.18e-05	4.37e-05	0	0	0.000738044	0.000670925	0.00169392	0.0159831	0	0	0	0.00304785	0.000652809	2.2e-05	0	0	1.69e-05	0	0	0	0	0	0	1.68e-05	0	9.33e-05	0	0	0	0	1.97e-05	0	0	0	0	0	0	0	0	1.74e-05	0	0	0	0
ZOTU960	0	0	0	0	0	0	0	0	0	1.64e-05	0.000167731	0	0	0.0284455	0	0	0	0	0	0	0	0	0	0	0	0	0	0	0	0	0	0	0	0	0	0	0	0	0	0	0	0	0	0	0	0	0	0	0
ZOTU4537	0	0.000104605	0	0	0.000159388	0.00051532	0	5.18e-05	9.51e-05	0.000246015	0.000209664	0	0	0	0	0	1.69e-05	0.0004123	0	0	0	0	0	0	0	0	0	0.000802354	0.00408857	0.00138964	0.000443252	6.75e-05	0.00805797	0.00284011	0.00710314	1.97e-05	0.000753661	0.00112391	4.6e-05	0	0	0	0	0	0	0	0	0	0
ZOTU11244	0	0.000125526	0	0	0.000462225	0.00139276	0.00179133	0.00124277	0.00039946	0	1.4e-05	0	0	0	0	0	3.39e-05	0.000154613	0	0	0	0	0	0	0	0	0	0.000630421	0.00111048	0.00126331	0.0020063	0.00121535	0.000455364	0.00232373	0.00327675	0.00240864	0.00462963	0.00324275	0.000161134	8.87e-05	4.09e-05	0	0	0	0	0	0	0	0
ZOTU802	0	0	0.00160389	0.0231474	0	0	0	0	0	0	0	0	0	0	0	0	0	0	0	0	0	0	4.91e-05	0.00363909	0	0	0	0	0	0	0	0	0	0	0	0	0	0	0	0	0	0	0	0	0	0	0	0	0
ZOTU3845	1.33e-05	0.000209209	0	0	0.000637552	0.000264624	0.000174764	1.73e-05	7.61e-05	6.56e-05	0	0	0	0	0	0	5.08e-05	0.000223329	0.000109895	0	0	0	0	0	0	0	0	0.000592213	0.000639365	0.000739939	0.000349936	6.75e-05	0.00194025	0.00370076	0.00224087	7.9e-05	0	0	0	0	0	0	0	0	0	0	0	0	0
ZOTU4832	0.000532751	0.000292893	0	0	0.00280523	0.000766017	0.000262146	0.000120825	0.000209241	3.28e-05	0	0	0	0	0	0	0.000423313	0.000773063	0	0	0	0.000101133	1.64e-05	0	0	0	0	0.00517709	0.00361746	0.00258076	0.000279949	6.75e-05	0.00502881	0.00189341	0.00133184	7.9e-05	0	0	0.000322269	2.22e-05	2.05e-05	0	0	0	0	0	0	0	0
ZOTU2727	6.66e-05	0.000418419	0	0	0.00435129	0.00194986	0.00183502	0.000362475	1.9e-05	3.28e-05	0	0	0	0	0	0	5.08e-05	0.00108229	0.000175832	0	0	0	1.64e-05	0	0	0	0	0.00708746	0.00294444	0.00236419	0.000699872	0.000236319	0.00154428	0.000344256	0.000338245	1.97e-05	0	7.37e-05	0	0.000421118	0	0	0	0	0	0	0	0	0
ZOTU9682	1.33e-05	2.09e-05	0	0	7.97e-05	9.75e-05	0	0	0	0.000311618	0	0	0	0	0	0	1.69e-05	0.000103075	0.000175832	0	0	0	0	0	0	0	0	7.64e-05	5.05e-05	0.00019852	0.000116645	0	0.00374191	0.000623965	0.0030442	0	0.00135659	0.000460617	0	0.000288133	0	0	0	0	0	0	0	0	0
ZOTU6301	0.000426201	0.00395406	0.000160389	0	0	0	0	5.18e-05	0.000513591	0	0	0	0	0	0	0	0	8.59e-05	0.000681349	0	0	0.0110572	0.00459796	0.000109721	0	0	0.00387222	0	0	0.000451182	0	3.38e-05	0	0	0	0.000118458	0	0	0	0	0	3.75e-05	5.71e-05	0	1.74e-05	0	0	9.18e-05	0
ZOTU6471	0.000173144	0.000125526	0	0	0.000382531	0.00139276	0.00332052	0.00112195	1.9e-05	1.64e-05	0	0	0	0	0	0	0.0033865	0.000481017	0	0	0	3.37e-05	0	0	0	0	0	0.000362969	0.000622539	0.000685797	0.00230958	0.00205935	0.000217783	0.00391591	0.00150096	0.00183609	0.00155039	0.000442193	4.6e-05	0	0	0	0	0	0	0	0	0	0
ZOTU3373	0.00125197	0.00108789	0	0	0	0	0	0	0	0.000803648	5.59e-05	0	0.0074528	0	0	0	8.47e-05	0.00216458	0.00400018	0.00407641	0.00473172	5.06e-05	0	0	0	0	0	0	0	0	0	0	0	0	0	0	0	0	0	0	0	1.87e-05	0	0	0	0	0	0	0
ZOTU905	0	0	0	0	0	0	0	0	0	3.28e-05	0	0	0	0	0.0254972	0	0	0	0	0	0	0	0	0	0	0	0	0	0	0	0	0	1.98e-05	0	0	0	0	0	0	0	0	0	0	0	0	0	2.45e-05	0	0
ZOTU10410	0	0	0	0	4.78e-05	9.75e-05	0.000305837	0.00103564	0.00264404	0	0	0	0	0	0	0	0	0	0	0	0	0	0	0	0	0	0	0	6.73e-05	0.000234615	0.000559897	0.000945275	0	0	8.46e-05	0.00126355	0	0.000718563	0.00128907	0.00199477	0.000593144	0.000899314	0.000457021	0.0037673	0.00130589	0	0	0.0027894	0.00339913
ZOTU13717	0.000119869	0.000209209	0	0	0.000191266	0.000362117	0.000131073	3.45e-05	1.9e-05	0	0	0	0	0	0	0	0.000220123	6.87e-05	0	0	0	0	0	0	0	0	0	0.00122263	0.00435778	0.00259881	0.000209962	6.75e-05	0.000593954	0	2.11e-05	3.95e-05	0	0	0	0	0	0	0	0	0	0	0	0	0
ZOTU6047	0.00532751	0.00125526	8.02e-05	0	0.000414409	0.000153203	0	0	0	0.00428065	0.0029353	0.00270711	2.24e-05	0	0	0	0.0355244	0.00436351	0	0	0	0.000235976	0.000130903	0	0	0	0	0.000515799	0	9.02e-05	0	0	0.000851333	0	6.34e-05	0	0.000236865	0	0	0	0	0	0	0	0	0	0	0	0
ZOTU11532	0.000186463	4.18e-05	0	0	0.00317182	0.00168524	0.00113597	0.000414257	0.000760876	0.000229614	1.4e-05	0	0	0	0	0	0.000101595	0.000807421	0	0	0	1.69e-05	0	0	0	0	0	0.00206319	0.00267524	0.00223786	0.000723201	0.00108032	0.0024946	0.00146309	0.00260026	0.00033563	0	0.000368494	2.3e-05	0	0	0	0	0	0	0	0	0	0
ZOTU6709	0.0111212	0.00192473	0.000160389	0	0.000175327	0.000640669	4.37e-05	0	0	0.000688841	0.00145367	0	0	0	0	0	0.00465644	0.000996392	0	0	0	0.000134844	0.000163629	7.31e-05	0	0	0	7.64e-05	0.000168254	0.000234615	2.33e-05	0.000911515	0.000118791	0	0.000824472	0	0	0	2.3e-05	0	0	0	0	0	0	0	0	0	0
ZOTU13654	0	0	0	0	6.38e-05	0.000334262	0	0	0	0	0	0	0	0	0	0	0	0	0	0	0	0	0	0	0	0	0	5.73e-05	0.000386984	0.000288757	0.000536568	0	0.000712744	0.0021516	0.0200622	0	0	1.84e-05	0	0	0	0	0	0	0	0	0	0	0
ZOTU4524	0	2.09e-05	0	0	0.000366592	0.00178273	0.0038885	0.0019332	0.000285328	0	0	0	0	0	0	0	5.08e-05	8.59e-05	8.79e-05	0	0	0.000168554	6.55e-05	0	3.36e-05	0	0	0.000191037	0.0011273	0.000992601	0.00223959	0.00185679	0.00025738	0.000968221	0.00116272	0.00163867	0.0035745	0.00121603	6.91e-05	0	0	0	0	0	0	0	0	0	0
ZOTU9962	0.000679257	0.000104605	0	0	3.19e-05	0	0	0	0	0.00119727	0.000712858	0	0	0	0	0	0.013055	0.00109947	0	0	0	8.43e-05	6.55e-05	0	0	0	0	0	0	0	0	0	5.94e-05	0	4.23e-05	0	0	0	0	0	0	0	0	0	0	0	0	0	0
ZOTU947	0.00339629	0.000564865	8.02e-05	0	0	2.79e-05	0	0	0	0.000377222	0	0	0	0	0	0	0.00462257	0.00084178	0	0	0	3.37e-05	1.64e-05	0	0	0	0	0	0	0	0	0	0	0	0	0	0	0	0	0	0	0	0	0	0	0	0	0	0
ZOTU2697	9.32e-05	0.000104605	0	0	0.000685368	0.00339833	0.0012015	0.000793993	0.000152175	6.56e-05	0	0	0	0	0	0	5.08e-05	0.000549734	0	0	0	0	0	0	0	0	0	0.000840561	0.0019854	0.00245443	0.00415257	0.00118159	0.00100972	0.0010758	0.00213517	0.00116483	0.000193798	0	0	0	0	0	0	0	0	0	0	0	0
ZOTU558	0	0	0	0	0	0	0	0	0	0	0	0	0	0	0	0	0	0	0	0	0	0	0	0	0	0	0	0	0	0	0	0	0	0	0	0	0	0	0	0	0	0	0	0	0	0	0	0	0.000298169
ZOTU463	2.66e-05	4.18e-05	0	0	0.00717246	0.00608635	0.000174764	0.000103564	7.61e-05	6.56e-05	0	0	0	0	0	0	5.08e-05	0.0017351	6.59e-05	0	0	0	1.64e-05	0	0	0	0	0.00439384	0.00464381	0.00225591	0	0.000101279	0.00102952	0	0.000147982	0.000138201	0	0	0	0	0	0	0	0	0	2.38e-05	0	0	0
ZOTU457	0	0	0	0	0	0	0	0	0	0	0	0	0	0	0	0	0	0	0	0	0	0.00815804	0.0128776	0.000621754	0.00100752	0	0	0	0	0	0	0	0	0	0	0	0	0	0	0	0	0	0	0	0	0	0	0	0
ZOTU2795	0.000293013	0.000271972	0	0	0.000143449	2.79e-05	0	0	0	0.00447746	0.00141174	0.00237466	0	0	0	0	0.00560466	0.00517093	0.000681349	0.000511327	0.000274038	3.37e-05	1.64e-05	0	0	0	0	5.73e-05	0.000201905	0.000180473	4.67e-05	0	9.9e-05	0.000129096	8.46e-05	1.97e-05	0	0	0	0	0	0	0	0	0	0	0	0	0
ZOTU636	0	0	0	0	0.00812878	0.00211699	2.18e-05	0	1.9e-05	4.92e-05	0	0	0	0	0	0	1.69e-05	0.000652809	0	0	0	0	8.18e-05	0	0	0	0	0.00395446	0.00455968	0.00314023	0	0	0.000930527	0	0	0	0	0	0	0	0	0	0	0	0	0	0	0	0
ZOTU3095	2.66e-05	6.28e-05	0	0	4.78e-05	0.000696379	0.00043691	0.000983861	0.00106523	4.92e-05	0	0	0	0	0	0	1.69e-05	0.000103075	8.79e-05	0	0	0	0	0	0	0	0	0.000401177	0.000757142	0.00110088	0.00174968	0.00178927	0.00025738	0.00217312	0.00188149	0.00276401	0.00269164	0.00243206	9.21e-05	0.000110821	4.09e-05	0	0	0	0	0	0	0	0
ZOTU10788	0	0	0	0	0	0	0	0	0	0	0	0	0	0	0	0	0	0	0	0	0	0	0	0	0	0	0	0	0	0	0	0	0.00188085	0.00339953	0.00492569	5.92e-05	0	0.000221096	0	0	0	0	0	0	0	0	0	0	0
ZOTU468	0	0	0	3.26e-05	0	0	0	0	0	4.92e-05	0.00208266	0.0195197	0	0	0	0	0	0	0	0	0	0	0	1.83e-05	0	0	0	0	0	0	0	0	0	0	0	0	0	0	0	0	0	0	0	1.51e-05	0	0	0	0	0
ZOTU1591	0	0	0	0	3.19e-05	0.00086351	0.000720902	0.00236472	0.002606	0	0	0	0	0	0	0	0	0	4.4e-05	0	0	0	0	0	0	0	0	0	0.000201905	0.000974553	0.00156305	0.00398366	0	0	0.000359385	0.00248761	0.000732127	0.00250576	0.000460384	0.000775744	6.14e-05	0	1.9e-05	0.000226946	0	0	0	0.000403729	0
ZOTU12401	0	0	0	0	0.000255021	0.000139276	0.000152919	0	0	0	0	0	0	0	0	0	0	0	0.000153853	0	0	0	0	0	0	0	0	0.000133726	0.000824444	0.000252662	0.000116645	0	0.00108891	0.000882157	0.00589815	0	0	0.000257946	0	0	0	0	0	0	0	0	0	0	0
ZOTU12811	0.00121201	0.000251051	0	0	0.000462225	2.79e-05	2.18e-05	0	0	0.000934855	0.000195687	0	0	0	0	0	0.00518135	0.00106511	0	0	0	0.000219121	0.000163629	0	0	0	0	0	0	0	0	0	0.000237581	0	2.11e-05	0	0	0	0	0	0	0	0	0	0	0	0	0	0
ZOTU11569	2.66e-05	0	0	0	0.00495696	0.00091922	0	0	0	0	0	0	0	0	0	0	5.08e-05	0	0	0	0	0	0	0	0	0	0	0.0026363	0.00385301	0.00272514	0	0	0.00196005	0	0.000126842	0	0	0	0	0	0	0	0	0	0	0	0	0	0
ZOTU588	6.66e-05	4.18e-05	0	0	0.00280523	0.00190808	8.74e-05	8.63e-05	1.9e-05	0	0	0	0	0	0	0	6.77e-05	1.72e-05	0	0	0	0	0	0	0	0	0	0.00462308	0.00455968	0.00303194	0.000559897	0.000101279	0.00158388	0.000150612	0.000147982	0	0	0	0	0	0	0	0	0	0	0	0	0	0
ZOTU7026	0.000332969	0.000125526	0	0	0.00175327	0.00153203	0.000961202	0.000500561	0.000665766	3.28e-05	0	0	0	0	0	0	0.00047411	0.00128844	0	0	0	0	0	0	0	0	0	0.0015665	0.00190127	0.00153402	0.00118978	0.000540157	0.00112851	0.0022807	0.000739911	0.00086869	0.000172265	0	6.91e-05	2.22e-05	0	0	0	0	0	0	0	0	0
ZOTU4474	4e-05	8.37e-05	0	0	0.000637552	0.00285515	4.37e-05	6.9e-05	9.51e-05	1.64e-05	0.000419328	0	0	0	0	0	1.69e-05	0.000274867	0.000241769	0	0	0	0	0	0	0	0	0.000859665	0.00388666	0.00328461	0.00247288	0.000168799	0.00168287	0	0.00069763	0.000256658	0	0.000608015	0.000253211	0.000155149	2.05e-05	1.87e-05	0	0	0	0	0	0	0
ZOTU4978	0	0	0	0	0.000749123	0.00167131	0.00152919	0.00174333	0.000836963	0	0	0	0	0	0	0	0	0	0	0	0	0	0	0	0	0	0	0.000496695	0.00116095	0.000938459	0.00221626	0.00151919	0.000316775	0.000882157	0.000317105	0.000552803	0.00127046	0.00195302	0.000184154	8.87e-05	2.05e-05	0	0	0	0	0	0	0	0
ZOTU4608	0	0	0	0	6.38e-05	8.36e-05	0.00043691	0.00303789	0.00289133	0	0	0	0	0	0	0	0	0	0	0	0	0	0	0	0	0	0	3.82e-05	0.000168254	0.000324851	0.00146973	0.00401742	1.98e-05	0	0.000147982	0.00136226	0.00176572	0.00152925	0.000552461	6.65e-05	0	0	0	0.000181557	0	0	0	0	0
ZOTU3190	0	0	0	0	1.59e-05	0.000222841	0.000546138	0.00315871	0.00241578	0	0	0	0	0	0	9.95e-05	0	0	0	0	0	0	0	0	0	0	0	0	5.05e-05	0.000631655	0.00268284	0.00324094	1.98e-05	0.000451836	6.34e-05	0.000414602	0.000925926	0.00296637	0	0	0	0	0	0	0	0	0	0	0
ZOTU711	0	0	0	0	0	0	0	0	0	0	0	0	0	0	0	0	0	0	0	0	0	0.00207322	0.0136139	0.00087777	0.00124261	0	0	0	0	0	0	0	0	0	0	0	0	0	0	0	0	0	0	0	0	0	0	0	0
ZOTU4471	1.33e-05	0	0	0	0.00117947	0.000167131	0	0	0	0	0.000153754	0	0	0	0	0	0	0	0	0	0	0	1.64e-05	0	0	0	0	0.00466129	0.00249016	0.00182278	0	0	0.00150468	0	0	0	0	0	0	0	0	0	0	0	0	0	0	0	0
ZOTU12794	0.000266375	0.000209209	0	0	0.00157794	0.0014624	0.00336421	0.00117373	0.00039946	0.00016401	0	0	0	0	0	0	0.000152393	0.00182099	0.000241769	0.000383495	0	0	0	0	0	0	0	0.00122263	0.000689841	0.00039704	0.000466581	0.000641437	0.00025738	0.000258192	0.000317105	9.87e-05	0.000516796	0.000368494	0.000644538	0.000177313	0.000368158	3.75e-05	0	1.51e-05	0	0	0	0	0
ZOTU2683	0.0143044	0.00167367	5.35e-05	0.000586835	0	0	0	0	0	0.000180411	9.78e-05	0	0	0	0	0	0.000253988	3.44e-05	0	0	0	0.000455097	4.91e-05	0	0	0	0	0	0	0	0	0	0	0	0	0	0	0	0	0	0	0	0	0	0	0	0	0	0
ZOTU8453	2.66e-05	6.28e-05	0	0	0.000972266	0.000125348	0	0	1.9e-05	1.64e-05	6.99e-05	0	0	0	0	0	0.000118528	6.87e-05	0	0	0	0	0	0	0	0	0	0.00391625	0.00122825	0.00086627	0	0	0.00291037	8.61e-05	0.000105702	0	0	0	0	0	0	0	0	0	0	0	0	0	0
ZOTU1049	0	4.18e-05	0	0	0	0	0	0	0	0	0	0	0	0	0	0	0	0	2.2e-05	0	0	0.0131304	0.00377982	0.000329164	0	0	0	0	0	0	0	0	0	0	0	0	0	0	0	0	0	0	0	0	0	0	0	0	0
ZOTU845	0	0	0.0145152	0.00268966	0	0	0	0	0	0	0	0	0	0	0	0	0	0	0	0	0	5.06e-05	1.64e-05	0	0	0	0	0	0	0	0	0	0	0	0	0	0	0	0	0	0	0	0	0	0	0	0	0	0
ZOTU657	0.000532751	0.000167368	0	0	0.000255021	0.000821727	0.000480601	0.000138086	5.71e-05	0.00109887	0.000726836	0	0	0	0	0	0.000999018	0.00204432	0.000197811	0	0	0	0	0	0	0	0	0.000401177	0.000151428	0.000216567	0.00198297	0.000101279	0.0100378	0.0347699	0.0215843	0.000829204	0.00157192	0.000829111	0	0	0	0	0	0	0	0	0	0	0
ZOTU6341	1.33e-05	8.37e-05	0	0	0.00258209	0.00160167	0.00126704	0.000327954	0.000152175	0.000131208	0	0	0	0	0	0	0.000186258	0.000876138	2.2e-05	0	0	0	0	0	0	0	0	0.00288465	0.00228825	0.00247248	0.00153972	0.000945275	0.000673147	0.00253889	0.000486227	0.00128329	0	0.000165822	2.3e-05	0.000199477	0.000143173	0.00013115	1.9e-05	1.51e-05	0	0	0	0	0
ZOTU4943	0.00237074	0.0008996	5.35e-05	0	0.00012751	0.000445682	0.00019661	0.000172607	0.000152175	0.00300138	0.00219448	0.00389444	0	0	0	0	0.00440245	0.00286892	0.000373643	0	0	0.000101133	8.18e-05	0	0	0	0	0.000343866	0.000420635	0.000613608	0.000886504	3.38e-05	0.0157992	0.0032274	0.00547534	3.95e-05	0.000193798	0.000165822	0.000207173	6.65e-05	0	0	0	0	0	0	0	0	0
ZOTU1606	0	6.28e-05	0	0	1.59e-05	0.000153203	2.18e-05	0.000103564	0	6.56e-05	9.78e-05	0	0	0	0	0	0.000152393	0.000395121	4.4e-05	0	0	0	0	0	0	0	0	3.82e-05	0.000100952	7.22e-05	0.000396594	6.75e-05	0.00207884	0.00705725	0.00543306	0.000157944	0.000150732	0.000294795	0	0	0	0	0	0	0	0	0	0	0
ZOTU10405	0	0	0	0	0.000223143	0.000877437	0	0.000103564	7.61e-05	0	0	0	0	0	0	0	0	3.44e-05	0	0	0	0	0	0	0	0	0	0.00021014	0.000471111	0.000685797	0.0016097	0.000101279	0.000970124	0.000903673	0.00866753	0.000217172	0	0.000571165	0	0.00106388	0	0	0	0	0	0	0	0	0
ZOTU589	0.00150502	0.00112973	0	0	0	0	0	0	0	0.00157449	0.00275359	0	0.00576919	0	0.0233405	0	0.00204883	0.000292046	0	0	0	1.69e-05	1.64e-05	0	0	0	0	0	1.68e-05	0	0	0	3.96e-05	0	0	0	0	0	0	0	0	0	0	0	0	0	0	0	0
ZOTU3116	0.000945633	0.000397498	0	0	0.000255021	0.000738162	0.000524292	1.73e-05	1.9e-05	1.64e-05	0	0	0	0	0	0	0.00167632	0.000360763	0.000131874	0	0	0.000286543	0.00011454	0	0	0	0	0.000382073	0.00171619	0.00147988	0.0012831	0.000607677	0.00025738	0.00243131	0.00175465	0.000217172	0.000732127	0	0	0	0	0	0	0	0	0	0	0	0
ZOTU4248	1.33e-05	4.18e-05	0	0	0.000430347	0.00143454	0.00163841	0.00257185	0.000437504	0	0	0	0	0	0	0	0	5.15e-05	4.4e-05	0	0	0	0	0	0	0	0	0.000133726	0.000588889	0.0010287	0.00223959	0.00205935	0	0.000387288	0.000507367	0.000809461	0.00114126	0.000755412	0	2.22e-05	0	0	0	0	0	0	0	0	0
ZOTU2581	5.33e-05	6.28e-05	0	0	0.000685368	0.000766017	2.18e-05	3.45e-05	0	0.000147609	0.000153754	0	0.00278358	0	0	0	3.39e-05	0.000721526	2.2e-05	0	0	0	0	0	0	0	0	0.000133726	0.000622539	0.000469229	0.000116645	6.75e-05	0.000415767	0.00219463	0.00433376	9.87e-05	0.000753661	0.00154767	4.6e-05	0	0	0	0	0	0	0	0	0	0
ZOTU4564	1.33e-05	6.28e-05	0	0	3.19e-05	0.000654596	0.00063352	0.0024165	0.00176904	0	0	0	0	0	0	0	0	3.44e-05	4.4e-05	0	0	0	0	0	0	0	0	0.000114622	0.000168254	0.000577513	0.00125977	0.00222815	1.98e-05	0.000365772	0.000295964	0.00304041	0.000279931	0.00193459	2.3e-05	2.22e-05	2.05e-05	0	0	1.51e-05	0	0	0	0.000128459	0
ZOTU12857	0.00135852	0.00043934	0	0	0	1.39e-05	0	3.45e-05	1.9e-05	0.00229614	0.00164936	0	0.014524	0	0	0	0.00235362	0.00061845	2.2e-05	0	0	5.06e-05	0	0	0	0	0	1.91e-05	0	9.02e-05	0.000769859	0	0.00704825	0	0.000338245	0	0	0	2.3e-05	0	0	0	0	0	0	0	0	0	0
ZOTU3592	0.000293013	0	0	0	0	0	0	0	0	0.00236174	9.78e-05	0	0	0	0	0	6.77e-05	0	0	0	0	0.00121359	0.00121085	0.000329164	0	0	0.0103259	0	0	0	0	0	0	0	0	0	0	0	0	0	0	0	0	0	0	0	0	0	0
ZOTU5567	0	0	0	0	4.78e-05	8.36e-05	0.000305837	0.00165703	0.00133153	0	0	0	0	0	0	0	1.69e-05	5.15e-05	4.4e-05	0	0	0	0	0	0	0	0	3.82e-05	0.000117778	0.000216567	0.00130643	0.00128287	1.98e-05	4.3e-05	6.34e-05	0.00157944	0.000366064	0.000442193	0.00158833	0.00192828	0.000265892	3.75e-05	0	0.001982	0	0	0	0.000935917	0
ZOTU369	0.00206441	0.00171552	0	0	1.59e-05	0	0	0	0	0	0	0	0	0	0	0	0.0184903	0.00343584	2.2e-05	0	0	0	0.000670877	0	0	0	0	0	0	0	0	0	0	0	0	0	0	0	0	0	0	0	0	0	0	0	0	0	0
ZOTU6532	2.66e-05	0	0	0	0.000669429	0.00174095	0.00238116	0.00119099	0.000456525	0	0	0	0	0	0	0	0.00020319	3.44e-05	0	0	0	0	0	0	0	0	0	0.000496695	0.00159841	0.00113698	0.00109647	0.00101279	0.000316775	0.000129096	0.000528508	0.000552803	0.00144272	0.000497467	9.21e-05	0	0	0	0	0	0	0	0	0	0
ZOTU13183	0.000133188	0.000251051	0	0	0.000478164	0.000961003	0.00111412	0.000776733	0.000665766	6.56e-05	0	0.00297624	0	0	0	0	0.000169325	0.000498196	0.000351664	0	0	0	1.64e-05	0	0	0	0	0.000343866	0.000117778	0.000144378	0.000209962	0.000270079	9.9e-05	0	0.000169122	0.000493574	0.00245478	0.000644864	0.000759634	0.00037679	0.000388612	0.000206093	0.000190425	0.000105908	3.48e-05	0	0	1.84e-05	0
ZOTU398	0	0	0	0	0	0	0	0	0	0	0	0.000221635	0	0	0	0	0	0	0	0	0	0.00175297	0.0220571	0.000621754	0	0	0	0	0	0	0	0	0	0	0	0	0	0	0	0	0	0	0	0	0	0	0	0	0
ZOTU4491	0	0	0	0	0.000510041	0.000208914	0	0	0	0	0	0	0	0	0	0	1.69e-05	1.72e-05	0	0	0	0	0	0	0	0	0	0.000496695	0.000504762	0.000685797	0.000163303	0	0.00982003	0.00593842	0.00526394	5.92e-05	0	0	0	0	0	0	0	0	0	0	0	0	0
ZOTU12824	0	0.00043934	0	0	0.000175327	0.00133705	0.00157288	0.000586865	5.71e-05	0	0	0	0	0	0	0	1.69e-05	0.000188971	8.79e-05	0	0	0	0	0	0	0	0	7.64e-05	0.000757142	0.000956506	0.00198297	0.00104656	5.94e-05	0.00264647	0.000422806	0.000473831	0.00155039	0.00090281	0	0	0	0	0	0	0	0	0	0	0
ZOTU577	0.00207773	0.000941442	0	0.00151599	0	0	0	0	0	0.000590435	0.000545127	0	0	0	0	0	0.00951607	0.00207868	0	0	0	0	0	0	0	0	0	0	0	0	0	0	0	0	0	0	0.000538329	0	0	0	0	0	0	0	0	0	0	0	0
ZOTU4864	0.000386244	0.000188288	0	0	3.19e-05	4.18e-05	0	0	3.8e-05	0.000410024	0.000503194	0	0.000157137	0	0	0	0.000846625	0.000137433	4.4e-05	0	0	0	1.64e-05	0	0	0	0	7.64e-05	3.37e-05	0.000126331	0.00158638	0	0.00613752	4.3e-05	0.000909033	0	0.000387597	0.000405343	0.000230192	0.000288133	0	0	0	0	0	0	0	0	0
ZOTU3213	0	0	0	0	0	2.79e-05	0	0	0	3.28e-05	0	0	0	0	0	0	3.39e-05	1.72e-05	0	0	0	0	0	0	0	0	0	3.82e-05	3.37e-05	3.61e-05	0	0	0.00787978	0.000925189	0.00346701	0	0	0	0	0	0	0	0	0	0	0	0	0	0
ZOTU11718	5.33e-05	4.18e-05	0	0	0.000255021	0.000417827	0.000262146	0.000224389	0.000114131	1.64e-05	0	0	0	0	0	0	5.08e-05	0.000120254	4.4e-05	0	0	8.43e-05	1.64e-05	0	0	0	0	0.000305659	0.000757142	0.000739939	0.000583226	0.000236319	0.00025738	0.00206554	0.00230429	0.0039091	0.00157192	0.00027637	0	0	0	0	0	0	0	0	0	0	0
ZOTU5192	0	0	0	0	0	0	0	0.000189868	0.000171197	0	0	0	0	0	0	0	0	0	0	0	0	0	0	0	0	0	0	0	0	0	0	0.000135039	1.98e-05	0	4.23e-05	0.000355373	0	0.000128973	2.3e-05	0.000177313	6.14e-05	9.37e-05	1.9e-05	0.00352523	3.48e-05	0.000214444	0	0.00825809	0.000715606
ZOTU7039	0	2.09e-05	0	0	0.00186484	0.00130919	0.000983048	0.000448779	7.61e-05	0	0	0	0	0	0	0	0	1.72e-05	0	0	0	0	0	0	0	0	0	0.000248348	0.00111048	0.000757986	0.000793188	0.000405118	0.000415767	0.00223767	0.00154324	0.000572545	0.000947459	0.000736988	0	0	0	0	0	0	0	0	0	0	0
ZOTU4598	0	0	0	0	0.00027096	0.00104457	0.00294914	0.00151894	0.000380438	0	0	0	0	0	0	0	0	0	0	0	0	0	0	0	0	0	0	7.64e-05	0.00043746	0.000649702	0.00254287	0.00219439	1.98e-05	0.000258192	0.000317105	0.00067126	0.00047373	0.000534316	0	0	0	0	0	0	0	0	0	0	0
ZOTU2093	0	0	0	0	0.000207204	0.000905292	2.18e-05	0	0	0	0	0	0	0	0	0	0	0	0	0	0	0	0	0	0	0	0	0.000114622	0.000723492	0.0012994	9.33e-05	6.75e-05	0.00051476	0.00219463	0.00809674	0	0	0	0	4.43e-05	0	0	0	0	0	0	0	0	0
ZOTU11325	5.33e-05	0.000146447	0	0	0.00052598	0.00132312	2.18e-05	0	0	4.92e-05	0	0	0	0	0	0	3.39e-05	0.000120254	0.000109895	0	0	0	0	0	0	0	0	0.000515799	0.00158159	0.00189496	0.00107314	0	0.00186105	0.000172128	0.00331903	3.95e-05	0.000150732	0.00101336	2.3e-05	8.87e-05	0	0	1.9e-05	0	0	0	0	0	0
ZOTU2444	6.66e-05	0.000146447	0	0	0.0020561	0.00164345	0.00246854	0.000224389	7.61e-05	0.000196812	0.000307507	0	0	0	0	0	6.77e-05	0.00125408	8.79e-05	0	0	1.69e-05	0	0	0	0	0	0.00135636	0.00106	0.000523371	0.000209962	0.000270079	0.000653349	0.000236676	0.000105702	0.000118458	0	0.000239521	0.00027623	8.87e-05	0.000204532	0	5.71e-05	4.54e-05	0	0	0	3.67e-05	0
ZOTU9126	0	0	0	0	0	0	0	0	0	0	0	0	0	0	0	0	0	0	0	0	0	0.0119674	0.00153811	0.000109721	0.000470177	0	0	0	0	0	0	0	0	0	0	0	0	0	0	0	0	0	0	0	0	0	0	0	0
ZOTU13066	0	0	0	0	1.59e-05	0.0014624	0.00128889	0.0013636	0.00106523	0	0	0	0	0	0	0	0	6.87e-05	0	0	0	0	0	0	0	0	0	1.91e-05	0.000302857	0.000306804	0.00114312	0.00189055	0	0.000172128	0.000295964	0.00185584	0.000301464	0.000773837	0.000207173	0.000642759	0.000204532	0	3.81e-05	9.08e-05	5.22e-05	0	0	0.000256918	0
ZOTU1004	0.0002131	0.000376577	0	0	0.000175327	0.000501393	0.000699056	0.00046604	0.000114131	3.28e-05	0	0	0	0	0	0	0.000355583	0.00084178	0.000307706	0	0	0	0	0	0	0	0	0.000324762	0.000975872	0.00128136	0.00100315	0.000675197	0.000118791	0.00114035	0.000951314	0.00282324	0.000301464	3.68e-05	4.6e-05	0	2.05e-05	1.87e-05	0	0	0	0	0	0	0
ZOTU944	0	0	0	0	0.000573797	0.00139276	0.00235931	0.0015362	0.000323372	0	0	0	0	0	0	0	3.39e-05	0	0	0	0	0	1.64e-05	0	0	0	0	0.000324762	0.000555238	0.000739939	0.00139974	0.00128287	0.000197985	0.000946705	0.000317105	0.000829204	0.000516796	0.000294795	2.3e-05	0	0	0	0	0	0	0	0	0	0
ZOTU6625	0	0	0	0	0	0	0	0	0	1.64e-05	0	0	0	0	0	0	0	0	0	0	0	0	0	0	0	0	0	3.82e-05	0	0	0	0	0.00534558	0	0.00209289	0	0.00178725	0.00121603	0	0	0	0	0	0	0	0	0	0	0
ZOTU3014	0	4.18e-05	0	0	0.000175327	0.000598886	0	0.000120825	0.000247285	0	0	0	0	0	0	0	1.69e-05	0.000103075	0	0	0	0	0	0	0	0	0	0.000515799	0.00149746	0.00126331	0.00251954	0.000236319	0.00146509	0.00114035	0.0029385	0.000513317	0	0.000184247	2.3e-05	0	0	0	3.81e-05	0	0	0	0	0	0
ZOTU9848	0	0.000188288	0	0	1.59e-05	0.000334262	0.00104858	0.00112195	0.000836963	0	0	0	0	0	0	0	0	6.87e-05	0.000109895	0.000156239	0	0	0	0	0	0	0	3.82e-05	0.000151428	0.000631655	0.00123644	0.00199183	0	0.000559416	0.000380526	0.00130303	0.00193798	0.00132658	0	0.000110821	0	0	0	0	0	0	0	0	0
ZOTU5042	0	0	0	0	0.000143449	0.00110028	0.00159472	0.00139812	0.000875007	0	0	0	0	0	0	0	0	0	0	0	0	0	0	0	0	0	0	9.55e-05	0.000420635	0.000469229	0.00181967	0.00222815	7.92e-05	0.000172128	0.000232543	0.000888433	0.00088286	0.000165822	6.91e-05	0.000177313	6.14e-05	0.000337243	0	9.08e-05	0	0	0	5.51e-05	0
ZOTU2585	0.00404891	0.0012971	0	0.000407525	0.00173733	0.00327298	0.002687	0.00229568	0.0030435	0.0017549	0.0013139	0	0	0	0	0	0.00436859	0.0050335	0.000483538	0	0.000840382	0.000235976	4.91e-05	0	0	0	0	0.00701104	0.0109702	0.0117668	0.0135542	0.00185679	0.0135421	0.0391807	0.0321967	0.00341553	0.00488803	0.00351912	0.000115096	0	0	0	0	0	0	0	0	0	0
ZOTU7102	0	0.00148539	0	0	0	6.96e-05	0	0.000638647	0.00146469	0	0	0	0	0	0	0	0	0	0	0	0	0.000235976	0.000310894	0.000128008	0	0	0	0	0	0.000306804	9.33e-05	0.000438878	0	0	0	9.87e-05	2.15e-05	0.000128973	0.00200267	0.00190611	0.00155445	0.00121782	0	0.000771617	0	0	0	0.000110108	0
ZOTU10612	0	0	0	0	0.000334715	0.00164345	2.18e-05	1.73e-05	9.51e-05	0	0	0	0	0	0	0	1.69e-05	1.72e-05	0	0	0	0	0	0	0	0	0	0.00042028	0.00459333	0.00386212	0.000699872	0.000135039	0.000395969	0	0.000507367	0	0	0	0	0	0	0	0	0	0	0	0	0	0
ZOTU1616	0.00118537	0.000732233	0	0	0.0831049	0.0304735	0.000524292	0.000362475	0.00039946	0.000705242	0.000447283	0.000649073	0.0113139	0	4.79e-05	0	0.00238748	0.0119395	0	0	0	3.37e-05	0.000212717	0	0	0	0	0.0688878	0.0462025	0.0391807	0.00223959	0.00155295	0.0441307	0.00531446	0.018688	0.00122406	0.00101206	0	0	0	0	0	0	0	0	0	0	0	0
ZOTU7125	0	0	0	0	0	0	0	0	0	0	0	0	0	0	0	0	0	0	0	0	0	0	0	0	0	0	0	0	0	0	0	0	0	0	0	0	0	0	0	0	0	0	0	0.000438762	0.0029252	0.00135815	0	0.00645966	0.00107341
ZOTU162	0.00162489	0.000878679	0	0	0.0283392	0.0198468	0.000305837	5.18e-05	3.8e-05	0.000639638	0.000531149	0	0.0050284	0	0	0	0.00220123	0.0231747	0.000197811	0	0	1.69e-05	6.55e-05	0	0	0	0	0.0197914	0.0117105	0.0108284	0.000606555	0.000202559	0.0223129	0.00574478	0.0179693	0.000256658	0	0	0	0	0	0	0	0	0	0	0	0	0
ZOTU11213	0	0	0	0	0.00140261	0.00126741	0.000524292	0.000742211	0	0	0	0	0	0	0	0	0	3.44e-05	0	0	0	0	1.64e-05	0	0	0	0	0.000477591	0.00111048	0.00086627	0.00188965	0.000843996	0.000534558	0.000602449	0.00122614	0.00053306	2.15e-05	0	6.91e-05	0	0	0	0	0	0	0	0	0	0
ZOTU387	0	0	0	0	0	0	0	0	0	0	0	0	0	0	0	0	0	0	0	0	0.000109615	0	0	0	0	3.42e-05	0	0	0	0	0	0	0	0	0	0	0	0	0	0	0	0	0	0	0	0	0	0	0
ZOTU7657	0.000226419	0.000125526	0	0	0.00157794	0.000598886	0.000895666	0.000655907	0.000266307	6.56e-05	0.000531149	0	0	0	0	0	0.00033865	0.000652809	4.4e-05	0	0	5.06e-05	0	0	0	0	0	0.00120353	0.000572063	0.000451182	0.000116645	0.000371358	0.00207884	0.000172128	0.000253684	0.000296144	0	0.00031322	0.000138115	0	0	0	0	0	0	0	0	0	0
ZOTU1733	9.32e-05	6.28e-05	0	0	0.000478164	0.000724234	0.00122335	0.00046604	0.000285328	3.28e-05	0.000433306	0.00220052	0	0	0	0	0.00020319	0.000377942	0.000109895	0	0	0	0	0	0	0	0	0.000114622	0.000117778	3.61e-05	4.67e-05	0.000168799	5.94e-05	0	0.000190263	0.000296144	0.00133506	0.00143713	0.000115096	0.000243805	0.000245439	0.000374714	0.000190425	0.000166427	0	0	0	0.000128459	0
ZOTU1483	0.0013452	0.000523023	0	0	0.000175327	0.000710306	0.000611674	0.000172607	3.8e-05	0	0	0	0	0	0	0	0.00138847	0.000549734	0.000395622	0.000326681	0	0.000539374	3.27e-05	0	0	0	0	0.000191037	0.000959047	0.000613608	0.000419923	0.000168799	0.000316775	0.00116186	0.000591929	0.000177687	0.000322997	3.68e-05	0	0	0	5.62e-05	0	0	0	0	0	0	0
ZOTU4765	0.000732532	0.000125526	8.02e-05	0	3.19e-05	9.75e-05	0.000349528	6.9e-05	0	0.000426425	0	0	0	0	0	0	0.00238748	0.00202714	0	0.000298274	0.000602883	0.000994471	0.000965409	7.31e-05	0	0	0	1.91e-05	5.05e-05	9.02e-05	0.000116645	3.38e-05	7.92e-05	0.00146309	0.000211403	5.92e-05	0	0	0	0	0	0	0	0	0	0	0	0	0
ZOTU1053	1.33e-05	4.18e-05	0	0	0.000255021	0.0013649	0	0	0	3.28e-05	0	0	0	0	0	0	3.39e-05	0.000103075	2.2e-05	0	0	0	0	0	0	0	0	0.000706835	0.00297809	0.00319437	0.000186632	0	0.000494961	0	0.00190263	1.97e-05	0	0	0	0	0	0	0	0	0	0	0	0	0
ZOTU818	7.99e-05	0	0	0	7.97e-05	1.39e-05	0	0	0	3.28e-05	9.78e-05	0	0	0	0	0	0.000186258	3.44e-05	0	0	0	0.0018541	0.00836142	0.00029259	0.000268673	0	0	0	0	0	0	0	0	0	0	0	0	0	0	0	0	0	0	0	0	0	0	0	0
ZOTU4266	0	0	0	0	0	1.39e-05	2.18e-05	6.9e-05	0.000190219	0	0	0	0	0	0	0	0	0	0	0	0	0	0	0	0	0	0	3.82e-05	1.68e-05	0	4.67e-05	0.000236319	0.000653349	0.000796093	0.0039321	0.000375116	0.00206718	0.00269001	4.6e-05	2.22e-05	0	0	0	0	0	0	0	0	0
ZOTU4029	0.00344956	0.00106697	5.35e-05	0	0	0	0	0	0	4.92e-05	0	0	0	0	0	0	0.00013546	0.000824601	0	0	0	0.00498921	0.000605426	0	0	0	0	0	0	0	0	0	0	0	0	0	0	0	0	0	0	0	0	0	0	0	0	0	0
ZOTU1273	0	0	0	0	0	0	0	0	0	0	0	0	0	0	0	0	0	0	0	0	0	0	0	0	0	0	0	0	0	0	0	0	0	0	0	0	0	0	0	0	0	0	0	0	0	0.000643332	0	0	0
ZOTU1351	0	0	0	0	0	0	0	0	0	0	0	0	0	0	0	0	0	0	0	0	0	5.06e-05	0	0	0	0	0	0	0	0	0	0	0	0	0	0	0	0	2.3e-05	0	0	0	0	0	0	0	0.0110583	0	0
ZOTU12517	0.000372926	0.000397498	0	0	6.38e-05	0.000710306	0.00063352	0.000396997	7.61e-05	1.64e-05	0	0	0	0	0	0	0.00040638	0.000669988	6.59e-05	0	0	0.000910194	0.00022908	5.49e-05	0	0	0	1.91e-05	0.000302857	0.000649702	0.00132976	0.000438878	7.92e-05	0.00126944	0.000549648	0.000197429	0.00120586	0	2.3e-05	0	0	0	0	0	0	0	0	0	0
ZOTU2838	2.66e-05	0.000167368	0	0	7.97e-05	0.000807799	0.000983048	0.000897558	0.000152175	0	0	0	0	0	0	0	0	0.000137433	8.79e-05	0.000142035	3.65e-05	1.69e-05	1.64e-05	0	0	0	0	0.000171933	0.000471111	0.000342898	0.0011198	0.00101279	1.98e-05	0.000580933	0.000211403	0.000454088	0.00284238	0.000239521	0	0	0	0	0	0	0	0	0	0	0
ZOTU9302	0	0	0	0	0.00430348	0.00164345	0.000131073	0	0	0	0	0	0	0	0	0	0	5.15e-05	0	0	0	0	0	0	0	0	0	0.00101249	0.00131238	0.00142574	9.33e-05	3.38e-05	0.000197985	0.000408804	0.000295964	7.9e-05	0	0	0	0	0	0	0	0	0	0	0	0	0
ZOTU1842	0.000199782	8.37e-05	0	0	0.000302837	0.00169916	0.00113597	0.000793993	1.9e-05	1.64e-05	0	0	0	0	0	0	3.39e-05	0.000326404	8.79e-05	0	0	0	0	0	0	0	0	0.000362969	0.00148063	0.000848222	0.000816517	0.000438878	0.000138589	0	0.00067649	0.000710746	0.000796727	0	0	0	0	0	0	0	0	0	0	0	0
ZOTU11140	6.66e-05	8.37e-05	0	0	0.00218361	0.000905292	2.18e-05	0	0	1.64e-05	0	0	0	0	0	0	1.69e-05	0.000240509	0	0	0	0	1.64e-05	0	0	0	0	0.000649524	0.00146381	0.0010287	7e-05	0	0.00140569	0.00154915	0.00112044	0	0	5.53e-05	0	0	0	0	0	0	0	0	0	0	0
ZOTU2275	6.66e-05	0.000313814	0	0	0.00639146	0.00639276	4.37e-05	0.000431518	0.000684788	3.28e-05	0	0	0	0	0	0	3.39e-05	0.00280021	2.2e-05	0	0	1.69e-05	0	0	0	0	0	0.00775609	0.00873238	0.0059917	0.00048991	0.000472638	0.0025144	0	0.00067649	0.000473831	0	0	0	0	0	0	0	0	0	0	0	0	0
ZOTU885	0.000532751	0.000251051	0	0	0.00294868	0.00235376	0.000349528	0.000138086	1.9e-05	0.00016401	0.000125798	0	0	0	0	0	0.000660368	0.00207868	0	0	0	3.37e-05	3.27e-05	0	0	0	0	0.00359149	0.0023219	0.0023281	0.000186632	0.000337598	0.00558316	0.00705725	0.00788534	0.000236915	0	0	0	0	0	0	0	0	0	0	0	0	0
ZOTU8627	0.000146506	2.09e-05	0	0	0.000318776	0.000654596	0.00104858	0.000638647	1.9e-05	0	0	0	0	0	4.79e-05	0	0.000592638	3.44e-05	0	0	0	1.69e-05	1.64e-05	0	0	0	0	0.000267451	0.000521587	0.000685797	0.00125977	0.000911515	0.000197985	0.00116186	0.000507367	0.000177687	0.00131352	0.000147398	0	0	0	0	0	0	0	0	0	3.67e-05	0
ZOTU5987	4e-05	0.00023013	0	0	0.00282117	0.000905292	0.000152919	5.18e-05	7.61e-05	3.28e-05	0.000139776	1.58e-05	0	0	0	0	6.77e-05	0.000463838	0	0	0	0	4.91e-05	0	0	0	0.0136334	0.00431743	0.00333143	0.00279733	9.33e-05	3.38e-05	0.00271239	8.61e-05	0.000443946	3.95e-05	0.000172265	0.000644864	0.000161134	8.87e-05	2.05e-05	0	0	0	0	0	0	0	0
ZOTU12051	0	0	0	0	0.000334715	0.000835655	0.00159472	0.000604125	0.000171197	0	0	0	0	0	0	0	0	1.72e-05	0	0	0	0	0	0	0	0	0	0.000152829	0.00131238	0.00115503	0.0016097	0.000573917	5.94e-05	0.000580933	0.000443946	0.000315887	0.000775194	0	0.000138115	0	0	0	0	0	0	0	0	0	0
ZOTU3946	0	0.000188288	0	0	0.000159388	0.00116992	0.00137627	0.000586865	0.000323372	0	0	0	0	0	0	0	0	0.000257688	0	0	0	0	0	0	0	0	0	9.55e-05	0.000538412	0.000631655	0.00107314	0.000371358	0	0.00032274	8.46e-05	0.000434345	4.31e-05	0.000442193	0.00027623	0.000199477	6.14e-05	1.87e-05	0	0	0.00168895	0	0	0.000293621	1.99e-05
ZOTU11207	0	0	0	0	0.00012751	0.000835655	0.00133258	0.00072495	0.000475547	0	0	0	0	0	0	0	1.69e-05	1.72e-05	0	0	0	0	0	0	0	0	0	5.73e-05	0.000319682	0.000469229	0.00139974	0.00101279	3.96e-05	0.000258192	0.000169122	0.000710746	0.000495263	0.000534316	2.3e-05	8.87e-05	2.05e-05	0	0	0.000181557	0.000888007	0.000119136	0	1.84e-05	0
ZOTU4329	1.33e-05	0	0	0	0.000111572	0.0004039	0.000961202	0.000845775	0.000228263	0	0	0	0	0	0	0	1.69e-05	5.15e-05	0	0	0	0.000168554	1.64e-05	0	0	0	0	0.000191037	0.000538412	0.00066775	0.00212294	0.000843996	0.000158388	0.000344256	0.000824472	0.000809461	0.000775194	0.000460617	0	0	4.09e-05	0	0	1.51e-05	0	0	0	0	0
ZOTU1262	0.000159825	4.18e-05	0	0	0.000286898	0.000334262	0	0	0	1.64e-05	0	0	0	0	0	0	0.00331877	0.000669988	0	0	0	3.37e-05	1.64e-05	0	0	0	0	0.000401177	0.00065619	0.000776033	4.67e-05	0	0.000217783	0.00286163	0.00069763	5.92e-05	0	0	0	0	0	0	0	0	0	0	0	0	0
ZOTU1554	0.000372926	0.00066947	0	0	0.00435129	0.00149025	0.000218455	1.73e-05	1.9e-05	0.000262416	0.000363418	0.00231133	0	0	0	0	0.00027092	0.000549734	0	0	0	3.37e-05	1.64e-05	0	0	0	0	0.00475681	0.00424	0.00395236	0.000116645	6.75e-05	0.00316775	0.00131248	0.00071877	1.97e-05	0.000430663	0.000884385	2.3e-05	0	0	0	0	0	0	0	0	0	0
ZOTU5011	1.33e-05	0.000104605	0	0	9.56e-05	0.000417827	0.00117966	0.000638647	0.000817941	0	0	0	0	0	0	0	1.69e-05	0.000154613	0.000175832	0	0	0	0	0	0	0	0	0.000152829	0.000252381	0.000342898	0.000886504	0.000708956	3.96e-05	0.000796093	0.000401666	0.00118458	0.000387597	0.00123445	0.000161134	8.87e-05	6.14e-05	0.000206093	1.9e-05	0	0	0	0	0	0
ZOTU1013	4e-05	2.09e-05	0	0	0.0055467	0.00239554	0.000371374	0.000293432	1.9e-05	1.64e-05	0	0	0	0	0	0	3.39e-05	0.000738705	0	0	0	0	0	0	0	0	0	0.00101249	0.000992698	0.000721891	0.000699872	0.000337598	0.000910729	0.00357166	0.00171236	0.000276401	0.00159345	0.000423768	0	0	0	0	0	0	0	0	0	0	0
ZOTU9592	0.000599345	2.09e-05	0	0	0.0018489	0.000320334	0	0	1.9e-05	0.000147609	5.59e-05	0	0	0	0	0	0.000372515	0.000652809	0	0	0	0	1.64e-05	0	0	0	0	0.00225423	0.00109365	0.000992601	0	0	0.00467243	0.00587387	0.00175465	0	0	0	0	0	0	0	0	0	0	0	0	0	0
ZOTU5875	2.66e-05	0.000104605	0	0	0.00269366	0.000696379	4.37e-05	0	1.9e-05	6.56e-05	0	0	0	0	0	0	1.69e-05	0.000137433	0	0	0	0	0	0	0	0	0	0.00750774	0.00260794	0.00203934	2.33e-05	0	0.0038409	0	6.34e-05	5.92e-05	0	0	0	0	0	0	0	0	0	0	0	0	0
ZOTU5130	0	0	0	0	0	0	4.37e-05	0.00112195	0.00117936	0	0	0	0	0	0	0	0	0	0	0	0	0	0	0	0	0	0	0	0	5.41e-05	0.000839846	0.00104656	0	0	0.000169122	0.000710746	0.000430663	0.00272685	0.000713595	0.000288133	0	1.87e-05	0	0.000817006	3.48e-05	0	0	0.000183513	0
ZOTU4633	0.000306332	0.000104605	0	0	0.000111572	4.18e-05	8.74e-05	0.000138086	0	0.00200092	0.00124401	0.00153561	0	0	0	0	0.00020319	0.000377942	6.59e-05	0	0	0	0	0	0	0	0	5.73e-05	3.37e-05	1.8e-05	0.000186632	0	0.00207884	0.000279708	0.000739911	0.000118458	0	0.000497467	0	0.000132985	0	0	0	0	0	0	0	0	0
ZOTU10781	1.33e-05	6.28e-05	0	0	0.00012751	0.000821727	0.00146365	0.000845775	0.000228263	1.64e-05	0	0	0	0	0	0	0	1.72e-05	0	0	0	5.06e-05	0	0	0	0	0	0.000229244	0.000673015	0.00066775	0.000606555	0.000607677	1.98e-05	0	0.000274824	0.000355373	0.00269164	5.53e-05	0.000184154	0.000199477	4.09e-05	0	0	0	0	0	0	0	0
ZOTU4565	5.33e-05	8.37e-05	0	0	0.0032037	0.000501393	0.000109228	0.000224389	0.000133153	0.000147609	0	0.00264379	0	0	0	0	0.000118528	0.000377942	6.59e-05	0	0	0	3.27e-05	0	0	0	0	0.00255989	0.00201905	0.00137159	0.000163303	0.000101279	0.00213823	0.00032274	0.000105702	0.000236915	0.000301464	0.000202672	0.00027623	6.65e-05	0	0	0	0	0	0	0	0	0
ZOTU7641	0	0	0	0	4.78e-05	0.000529248	0.00124519	0.000880297	0.000456525	0	0	0	0	0	0	0	0	0	0	0	0	0	0	0	0	0	0	5.73e-05	5.05e-05	0.000433135	0.00163303	0.000810236	0	0	8.46e-05	0.000434345	0.00101206	0.000552741	0.000391326	0.000265969	2.05e-05	0	0	0.000408503	0.000609416	0	0	0.000220216	0
ZOTU14077	0.000133188	2.09e-05	0	0	0.00390501	0.000362117	2.18e-05	0	0	3.28e-05	0.000125798	0	0	0	0	0	0.000118528	0.000103075	0	0	0	0	3.27e-05	0	0	0	0	0.00504337	0.000740317	0.000920411	2.33e-05	0	0.00399929	0	0.000126842	0	0	0	0	0	0	0	0	0	0	0	0	0	0
ZOTU1565	9.32e-05	0	2.67e-05	0	0	0	0	0	0	0.00142688	0.000838656	0	0.00673446	0	0	0	0.000694233	0.00020615	0	0	0	0	0	0	0	0	0	0	0	0	0	0	0	0	0	0	0	0	0	0	0	0	0	0	0	0	0	0	0
ZOTU4646	7.99e-05	0.000146447	0	0	0.00129104	0.000724234	0.00113597	0.000396997	0.000380438	0	2.8e-05	0	0	0	0	0	5.08e-05	0.00063563	6.59e-05	0	0	1.69e-05	0	0	0	0	0	0.00242616	0.00227143	0.00138964	0.00146973	0.000371358	0.00102952	0.000494868	0.000211403	0.000217172	0	0	0	0	0	0	0	0	0	0	0	0	0
ZOTU7016	2.66e-05	0.000146447	0	0	0.00159388	0.000264624	6.55e-05	3.45e-05	3.8e-05	6.56e-05	0	0	0	0	0	0	8.47e-05	0.000120254	8.79e-05	0	0	0	1.64e-05	0	0	0	0	0.00179574	0.00146381	0.00131745	7e-05	6.75e-05	0.00281138	0	0.000295964	1.97e-05	0	0.000239521	0.000161134	2.22e-05	0	0	0	0	0	0	0	0	0
ZOTU2449	0.00249061	0.00322183	0.000267315	0.0016627	1.59e-05	1.39e-05	0	0	0	3.28e-05	0.000111821	0	0	0	0	0	0.00126994	0.000343584	2.2e-05	0	0	6.74e-05	8.18e-05	0.000182869	0	0	0	0	0	0.000108284	0	0	0	0	0	0	0	0	0	0	0	0	0	0	0	0	0	0	0
ZOTU13637	0	0	0	0	6.38e-05	8.36e-05	0	0	0	0	0	0	0	0	0	0	0	0	2.2e-05	0	0	0	0	0	0	0	0	3.82e-05	5.05e-05	0.000108284	0.000116645	0	0.0038409	0.00103277	0.00452403	0	0	0	0	0	0	0	0	0	0	0	0	0	0
ZOTU14390	0	0	2.67e-05	0	0	0	0	0	0	0	0	0	0	0	0	0	0	0	0	0	0	0.000168554	0.00117813	0.00137152	0.000906771	0.00619248	0	0	0	0	0	0	0	0	0	0	0	0	0	0	0	0	0	0	0	0	0	0	0
ZOTU2169	0	0	0	0	1.59e-05	0	0	0	0	0	0	0	0	0	0	0	1.69e-05	0	0	0	0	0	1.64e-05	0	0	0.00971638	0	0	0	0	0	0	0	0	0	0	0	0	0	0	0	0	0	0	0	0	0	0	0
ZOTU1615	0	4.18e-05	0	0	0	0.000139276	8.74e-05	0.000811254	0.00171197	0	0	0	0	0	0	0	0	0	0	0	0	0.000252832	8.18e-05	0	0	0	0	1.91e-05	0	0.000126331	0.00074653	0.000776476	0	0	4.23e-05	0.00108586	0.00101206	0.0125472	0.00103586	0.00113037	0.0022294	0.000112414	0.00129489	0.000847265	0	0	0	1.84e-05	0
ZOTU4981	0	4.18e-05	0	0	3.19e-05	0.000236769	0.000174764	0.00231294	0.00342394	0	0	0	0	0	0	0	0	1.72e-05	0	0	0	0	0	0	0	0	0	0	1.68e-05	0.000288757	0.00107314	0.00273455	1.98e-05	0	4.23e-05	0.00337604	0.000645995	0.00241363	0.00193361	0.00192828	0.000388612	0.000281036	1.9e-05	0.000257206	0	0	0	0	0
ZOTU9594	0.000199782	0.000188288	0	0	0.000430347	0.00122563	0.000742747	0.000759472	0.000171197	0	0	0	0	0	0	0	8.47e-05	0.0012369	0.000197811	0	0	0	0	0	0	0	0	0.000362969	0.000790793	0.000812128	0.00174968	0.000472638	7.92e-05	0.000301224	0.00124728	0.000730489	0.00155039	0.00117918	4.6e-05	4.43e-05	4.09e-05	0	0	0	0	0	0	0	0
ZOTU10148	0.000173144	0.000104605	0	0	0.000286898	0.000598886	0.00128889	0.000396997	0.000266307	0	0	0	0	0	0	0	0.00020319	0.000188971	6.59e-05	0	0	0	0	0	0	0	0	0.000152829	0.000605714	0.000559466	0.00074653	0.000776476	0.000118791	0.000516384	0.000866753	0.000355373	0.00398364	0.00158452	2.3e-05	0	0	5.62e-05	0	0	0	0	0	0	0
ZOTU4619	0	0	0	0	0	0	0	3.45e-05	3.8e-05	0	0	0	0	0	0	0	0	0	0	0	0	0	0	0	0	0	0	0	0	0	0	0	0	0	0	1.97e-05	0	0	0	0	0.00153399	0	0.000304681	0.00419094	0	0	0	0.00273435	0.00494961
ZOTU2573	0	0	0	0	0	0	0	0.000155347	0.000418482	0	0	0	0	0	0	0	0	0	0	0	0	0	0	0	0	0	0	0	0	0	2.33e-05	6.75e-05	0	0	4.23e-05	0.000177687	0	0.00184247	6.91e-05	0.000110821	8.18e-05	0.00116161	7.62e-05	0.00245102	3.48e-05	0	0	0.00581737	0
ZOTU11292	4e-05	0.000104605	0	0	7.97e-05	5.57e-05	0.000131073	3.45e-05	1.9e-05	3.28e-05	1.4e-05	0.00075989	0	0	0	0	0.00047411	0.000137433	0	0	0	1.69e-05	0	0	0	0	0	0	0	0	0	0	0.000455364	0.00163522	0.000824472	5.92e-05	0.00689061	0.000515891	0	0	0	0	0	0	0	0	0	0	0
ZOTU1190	0.000186463	6.28e-05	0	0	0.000302837	0.000306407	0.00128889	0.000207129	0.000114131	0.000180411	0	0	0	0	0	0	6.77e-05	0.00130562	0.00021979	0	0	0	1.64e-05	0	0	0	0	0.000611317	0.000353333	0.000505324	2.33e-05	6.75e-05	0.00077214	0.00114035	0.00133184	0.000118458	0.000645995	0.000571165	4.6e-05	0	0	0	0	0	0	0	0	0	0
ZOTU203	0	6.28e-05	2.67e-05	0	9.56e-05	0.00179666	0.00113597	0.00450505	0.00595385	3.28e-05	0	0	0	0	0	0	0	0	0	0	0	0	0	0	0	0	0	9.55e-05	0.000151428	0.000559466	0.00366266	0.00340974	0	6.45e-05	0.000591929	0.00276401	0.00665375	0.0198802	0.00423553	0.0034576	0.000593144	3.75e-05	5.71e-05	0.000302595	0	0	0	0	0
ZOTU7963	0.00617991	0.00146447	8.02e-05	0	4.78e-05	0.000111421	0.00109227	0.000655907	0	0.0016237	0.00128594	0	0	4.28e-05	0	0	0.00299705	0.00233637	0	0	0	0.000455097	0.00022908	0	0	0	0.0233946	7.64e-05	8.41e-05	0.00019852	0.00074653	0.000270079	0	0.000344256	8.46e-05	1.97e-05	0	1.84e-05	0	0	0	0	0	0	0	0	0	0	0
ZOTU712	9.32e-05	2.09e-05	0	0	0	2.79e-05	0	0	0	0	0	0	0	0	0	0	1.69e-05	0	0	0	0	0.00202265	0.0071833	0.00171897	0.000940355	0	0.0131091	1.91e-05	0	9.02e-05	0	0	0	0	0	0	0	0	0	0	0	0	0	0	0	0	0	0	0
ZOTU1391	0.00010655	4.18e-05	0	0	0.00269366	0.00264624	0.00760224	0.0010529	0.000209241	0	0	0	0	0	0	0	0.00013546	0.00111665	6.59e-05	0	0	0	0	0	0	0	0	0.000248348	0.000925396	0.000848222	0.00181967	0.000573917	0.000158388	0.000645481	0.000739911	0.000493574	0.00114126	0.00031322	6.91e-05	0	0	0	0	0	0	0	0	0	0
ZOTU4464	0	0	0	0	1.59e-05	0.000849582	0.000917511	0.00195046	0.00192121	0	0	0	0	0	0	0	0	0.000154613	4.4e-05	0	0	0	0	0	0	0	0	3.82e-05	0.000134603	0.000541419	0.00116645	0.00162047	0	0	0.00069763	0.00211249	0.00335917	0.00326117	0.000713595	0.00101955	0.000552238	0.000337243	0.000190425	0.000166427	1.74e-05	0	0	0.000238567	1.99e-05
ZOTU5072	1.33e-05	0.000523023	0	0	0.000302837	0.00147632	0.0022064	0.000983861	0.000817941	0	0	0	0	0	0	0	0	0.000515375	0.000197811	0	0	0	0	0	0	0	0	0.00021014	0.000487936	0.000721891	0.00139974	0.00104656	5.94e-05	0.000645481	0.000570788	0.000789718	0.00157192	0.0014924	0.000138115	0.000110821	0	0	0	0	3.48e-05	0	0	7.34e-05	0
ZOTU799	0	0	0	0	0	0	0	0	0	0.00113167	0.0023063	0.00129815	0.0107527	0	0	0	0	0	0	0	0	0	0	0	0	0	0	0	0	0	0	0	0	0	0	0	0	0	0	0	0	0	0	0	0	0	0	0	0
ZOTU9803	0	0	0	0	0	0	0	1.73e-05	0	0	0	0	0	0	0	0	0	0	0	0	0	0	0	0	0	0	0	0	0	0	0	0	0	0	0	0	0	0	0	0	0	0	0	0.000136168	0.00302967	0	0	0.00166997	0.0100781
ZOTU808	0	2.09e-05	0	0	0.000382531	0.00214485	0.00115781	0.000811254	0.000627723	1.64e-05	0	0	0	0	0	0	5.08e-05	0.000188971	2.2e-05	0	0	0	0	0	0	0	0	0.000171933	0.000572063	0.000523371	0.000863175	0.000979035	5.94e-05	0.000279708	0.00101473	0.00104638	0.00247631	0.00112391	6.91e-05	8.87e-05	0	0	0	0	0	0	0	0	0
ZOTU1605	2.66e-05	2.09e-05	0	0	0.00159388	0.0012117	0.002687	0.0004833	0	1.64e-05	0	0	0	0	0	0	6.77e-05	0.000532555	0	0	0	0	0	0	0	0	0	0.000401177	0.000689841	0.000685797	0.00163303	0.000573917	0.000296977	0.00137703	0.000380526	9.87e-05	0	0	0	0	0	0	0	0	0	0	0	0	0
ZOTU4680	0.000439519	0.000690391	0	0	0	0.000181058	0.000502447	0.000863036	0.000855985	0	0	0	0	0	0	0	0	0.000944855	0.000395622	0.000582345	0	0	0	0	0	0	0	0	3.37e-05	0.000306804	0.000536568	0.000675197	0	0	0	0.000375116	0.00101206	0.00086596	0.00085171	0.00132985	0.000245439	0.000299771	0	0	0	0	0	0	0
ZOTU1996	1.33e-05	0	0	0	3.19e-05	0.000264624	0.00181318	0.00219211	9.51e-05	0	0	0	0	0	0	0	1.69e-05	6.87e-05	0	0	0	0	0	0	0	0	0	0	0.000117778	7.22e-05	0.00209961	0.00158671	1.98e-05	0.0022807	0.000338245	0.000355373	0.000193798	0.000368494	0	4.43e-05	0	0	0	0	0	0	0	0	0
ZOTU14033	0.00416878	0.000815917	0	0	0	0	0	0	0	0.00083645	0.000363418	0	0	0	0	0	0.00193031	0.00061845	0	0	0	0.00205637	0.000621789	0	0.000537346	0	0	0	0	0	0	0	0	0	0	0	0	0	0	0	0	0	0	0	0	0	0	0	0
ZOTU1034	0	0	0	0	0	0	0	0	7.61e-05	0	0	0	0	0	0	0	0	0	0	0	0	0	0	0	0	0	0	0	0	0	0	0	0	0	0	0	0	1.84e-05	0.000184154	0.00188395	0.00265892	0.00397197	0.00179	0.000196687	0	0	0	0.000403729	0
ZOTU7030	0	0	0	0	0	0	0	0	0	0	0	0	0	0	0	0	0	0	0	0	0	0	0	0	0	0	0	0	0	0	0	0	0	0	0	0	0	0	0	0	0	0	0	0.000121038	0	0.0093164	0	0.000807458	0
ZOTU10842	7.99e-05	0.000271972	0	0	0.000828817	0.0012117	0.00155103	0.000414257	7.61e-05	0	0	0	0	0	0	0	3.39e-05	0.000103075	0.000285727	0	0	3.37e-05	0	0	0	0	0	0.000133726	0.000403809	0.000577513	0.000723201	0.000270079	0.000158388	0.00137703	0.000295964	0.000394859	0.000150732	0.00031322	9.21e-05	4.43e-05	0	1.87e-05	0	0	0	0	0	0	0
ZOTU11061	0	0.00190381	0.000106926	0	0	0	0	0	0	0.00393623	0.032484	0.0219418	0.0256134	0	0	9.95e-05	0	0	2.2e-05	7.1e-05	0.00043846	0.000471953	0.00302713	0.000256016	0.000537346	0	4.03e-05	0	0	0	0	0	0	0	0	1.97e-05	0	0	0	0	0	0	0	0	0	0	0	0	0
ZOTU1437	1.33e-05	0	0.00879468	0.0261142	0	0	0	0	0	0	0	0	0	0	0	0	0	0	0	0	0	0	0.00045816	5.49e-05	0.000201505	0	0	0	0	0	0	0	0	0	0	0	0	0	0	0	0	0	0	0	0	0	0.000514908	0	0
ZOTU7198	1.33e-05	0.000481182	0.00205833	0.00356991	0	0	0	0	0	0.000492029	0.00557707	0.000775722	0	0	0	0	0	0	0	0	0	0.000623652	0.00022908	0.00023773	0.000537346	0	0	0	0	0	0	0	0	0	0	0	0	0	0	0	0	0	0	0	0	0	0	0	0
ZOTU12151	0	0	0	0	0	0	0	0	0	0.000410024	0.000125798	0	0	0.0619813	0	0	0	0	0	0	0	0	0	0	0	0	0	0	0	0	0	0	0	0	0	0	0	0	0	0	0	0	0	0	0	0	0	0	0
ZOTU8816	0	0	0	0	0	0	0	0	0	0.000606836	0.000489216	0.00455934	0.0184524	0	0	0	0	0	0	0	0	0	0	0	0	0	0	0	0	0	0	0	0	0	0	0	0	0	0	0	0	0	0	0	1.74e-05	0	0	0	0
ZOTU6913	0.000839083	0.000543944	0	0	4.78e-05	0.000278552	0.000655365	1.73e-05	0	0.00016401	0.00029353	0.000474932	0	0	0	0	0.00020319	0.000292046	0	0	0	0.000168554	8.18e-05	9.14e-05	0	0.00465291	0	0	3.37e-05	0.000216567	0.000279949	6.75e-05	0	0.000602449	0	0	0	0	0	0	0	0	0	0	0	0	0	0	0
ZOTU1978	0	0	0.000133658	0.046197	0	5.57e-05	0	0	0	0.000278817	0.0177655	0.191777	0.0103935	8.56e-05	0.0237239	0	0	3.44e-05	2.2e-05	1.42e-05	0	0.00750067	0.210819	0.679724	0.296715	0.395258	0.524161	0	0	0	0	0	0	0	0	0	2.15e-05	0	0	0	0	0	1.9e-05	0	0	4.77e-05	0	1.84e-05	0
ZOTU25	0	0	0	0	0	0	6.55e-05	0	0	0	0	0	0	0	0	0	0	0	0	0	0	0	0.00168538	0.0109356	0.447474	0.0101269	0.0101242	0	0	0	0	0	0	0	0	0	0	0	0	0	0	0	0	0	0	0	0	1.84e-05	0
ZOTU3310	0	0	0	0	0	0	0	0	0	0	0	0	0	0	0	0	0	0	0	0	0	0.0052589	0.0248388	0.00566893	0.00439952	0.00390024	0	0	0	0	0	0	0	0	0	0	0	0	0	0	0	0	0	0	0	0	0	0	0
ZOTU5358	0	0	0	0	0	0	0	0	0	0	0	0	0	0	0	0	0	0	0	0	0	0.000792206	0.00885231	0.00160925	0.0021158	0.000957953	0	0	0	0	0	0	0	0	0	0	0	0	0	0	0	0	0	0	0	0	0	0	0
ZOTU618	0	0	0.0159855	0.0578359	0	0	0	0	0	1.64e-05	0.00272563	0.00625327	0	0	0	0	0	1.72e-05	0	0.00068177	0	0.00101133	0.00755964	0.000274303	0.000302257	0.00106059	0	0	1.68e-05	0	0	0	0	0	2.11e-05	0	0	0	0	0	0	0	0	0	0	0	0	0	0
ZOTU343	0	0	0	0	0	0	0	0	0	0.00410024	0.0130411	0.00541422	0.00154893	0.0569766	0	0	0	0	2.2e-05	0	0	0	0	0	0	0	4.03e-05	0	0	0	0	0	0	0	0	0	0	0	0	0	0	0	0	0	0	0	0	0	0
ZOTU1197	0	0	0	0	0	0	0	0	0	0.000114807	0.000265575	0.00123482	0	0	0	0.0423054	0	0	0	0	0	0	0	0	0	0	0	0	0	0	0	0	0	0	0	0	0	0	0	0	0	0	0	0	0	0	0	0	0
ZOTU435	0	0	0	0	0	0	0	0	0	0	0.00375998	0.0249656	0	0	0	0	0	0	0	0	0	0	0	0	0	0	0	0	0	0	0	0	0	0	0	0	0	0	0	0	0	0	0	0	0	0	0	0	0
ZOTU5263	0	0.00066947	0.00069502	0	0	0	0	0	0	0.000410024	0.0121885	1.58e-05	0	0	0	0	0	0	0	0	0	0.000168554	3.27e-05	0	0	0	0	0	0	0	0	0	0	0	0	0	0	0	0	0	0	0	0	0	0	0	0	0	0
ZOTU1202	0	0	2.67e-05	0.000146709	0	0	0	0	0	0	0	0	0	0	0	0	0	0	0	0	0	0.000168554	0.00251988	0.00087777	0.000973939	0.00708201	0.00209745	0	0	0	0	0	0	0	0	0	0	0	0	0	0	0	0	0	0	0	0	0	0
ZOTU789	0	0	0	0	0	0	0	0	0	0.000459227	0.0058706	0.0057625	0.000179586	0	0	0	0	0	0	0	0	0	0	0	0	0	0	0	0	0	0	0	0	0	0	0	0	0	0	0	2.05e-05	0	0	0	0	0	0	0	0
ZOTU1726	0	0.00154815	0.000561362	0	0	0	0	0	0	0.000541232	0.000223642	0.000332452	0.00163872	0	0.00517613	0	0	0	0.000153853	4.26e-05	9.13e-05	0.000101133	4.91e-05	0	0	0	0	0	0	0	0	0	0	0	0	0	0	0	0	0	0	0	0	0	0	0	0	0	0
ZOTU14269	0	0	0	0	1.59e-05	4.18e-05	0.000109228	3.45e-05	0	0	0	0	0	0	0	0	0	1.72e-05	0	0	0	0	0	0	0	0	0	0	1.68e-05	0	4.67e-05	0.000101279	0	0.000365772	0.000190263	0.000118458	0	0.000147398	0	0	0	0	0	0	0	0	0	0	0
ZOTU6951	1.33e-05	0.000104605	0	0	0.00027096	0.000961003	0.00131073	0.00070769	0.00039946	6.56e-05	0	0	0	0	0	0	6.77e-05	0.000326404	4.4e-05	0	0	0	0	0	0	0	0	5.73e-05	0.000134603	0.000216567	0.000559897	0.000236319	7.92e-05	0.000839125	0.00065535	0.000375116	0.000904393	0.00136343	4.6e-05	0	0	0	0	0	0	0	0	0	0
ZOTU9208	5.33e-05	0	0	0	9.56e-05	0.000640669	0.00222824	0.000535082	0.000418482	0	0	0	0	0	0	0	0.00013546	0.000481017	0	0	0	0	0	0	0	0	0	0.000114622	0.000336508	0.000739939	0.00100315	0.000810236	0.000138589	0.000129096	0.000380526	0.000375116	0.00040913	0.000460617	0.000115096	4.43e-05	0	0	0	0	0	0	0	0	0
ZOTU4451	0	4.18e-05	2.67e-05	0	0	0	0	0	0	0	0	0	0	0	0	0	0	0	0	0	0	0.00406216	0.000490886	0.000859484	0	0.00396866	0	0	0	0	0	0	0	0	0	0	0	0	9.21e-05	2.22e-05	0	0	7.62e-05	0	0	0	0	0	0
ZOTU1489	1.33e-05	0	0	0	0.000223143	0.000877437	0.00253408	0.00415983	0.000665766	0	0	0	0	0	0	0	0	0	0	0	0	0	0	0	0	0	0	0.000286555	0.000757142	0.00086627	0.00389595	0.00253199	0	0.00202251	0.00065535	0.00195455	0.000904393	0.000939659	0.000115096	0.000687087	0	0	0	0	0	0	0	0	0
ZOTU1862	0	0	0	0	0	1.39e-05	2.18e-05	0.000500561	0.00224458	0	0	0	0	0	0	0	0	0	0	0	0	0	0	0	0	0	0	0	0	0.000288757	9.33e-05	0.000371358	0	0	2.11e-05	0.000296144	0	0.000497467	0.000483403	0.000886564	0.000224986	0.000730693	0.000761702	0.000438762	3.48e-05	0	0	0.00172502	0
ZOTU2303	0	0	0	0	4.78e-05	0.000571031	0.000415065	5.18e-05	0.000171197	0	0	0	0	0	0	0	0	0	0	0	0	0	0	0	0	0	0	9.55e-05	0.000302857	0.000252662	0.000769859	0.00546909	5.94e-05	0.00021516	0.000549648	3.95e-05	0.000495263	0.000110548	0	0	0	0	0	0	0	0	0	0	0
ZOTU3330	0	0	0	0	0	0	0	3.45e-05	0.000285328	0	0	0	0	0	0	0	0	0	0	0	0	0	0	0	0	0	0	1.91e-05	0	0.000144378	0	3.38e-05	0	0	0	0	0	0	0.00029925	0.000243805	0.00128855	0	0	0.00349497	0	0	0	0.00376202	0
ZOTU3067	0	0	0	0	0	0	0	0	0	0	0	0	0	0	0	0	0	0	0	0	0	0	0	1.83e-05	0	0.00482398	0.0047596	0	0	0	0	0	0	0	0	0	0	0	0	0	0	0	0	0	0	0	0	0	0
ZOTU4140	0	0.000313814	0	0	0	2.79e-05	0	0.00046604	0.00117936	0	0	0	0	0	0	0	0	0	0	0	0	0	0	0	0	0	0	0	0	0.000126331	7e-05	0.000236319	0	0	0	0.000197429	0	0	0.00230192	0.0011082	4.09e-05	0.00363473	0.0015234	0.00833648	1.74e-05	0.000548024	0	0.00264259	0.000258413
ZOTU11070	5.33e-05	0.000104605	0	0	1.59e-05	5.57e-05	2.18e-05	0	0	0.000442826	1.4e-05	3.17e-05	0	0	0	0	8.47e-05	8.59e-05	6.59e-05	0	0	0.00161812	0.00463069	0.000164582	0	0	0	3.82e-05	0.000151428	0.000108284	0.000186632	0	0.00077214	0.000365772	0.000359385	0	2.15e-05	0.000147398	0	0	0	0	1.9e-05	0	0	0	0	0	0
ZOTU1386	0	0	0.000240584	0	0	0	0	0	0	0	0	0	0	0	0	0	0	0	0	0	0	0	0.0011454	0.00438885	0.00117544	0.00260016	0	0	0	0	0	0	0	0	0	0	0	0	0	0	0	0	0	0	0	0	0	0	0
ZOTU4879	0	0	0	0	1.59e-05	0.000208914	0.000131073	0.000517822	0.00171197	0	0	0	0	0	0	0	0	0	0	0	0	0	0	0	0	0	0	0	0	0.000162426	0.00025662	0.000540157	0	0	0	0.000256658	0.000624462	1.84e-05	0.00087473	0.0011082	0.00169762	0.000224829	0.00127585	0.00219381	0.00174119	0.00219209	0	0.00187183	0.000854752
ZOTU3038	0	0	0	0	0	0	0	8.63e-05	0.000380438	0	0	0	0	0	0	0	0	0	0	0	0	0	0	0	0	0	0	0	0	1.8e-05	9.33e-05	6.75e-05	0	0	0	3.95e-05	0	0	0.000437365	0.000775744	0.00120674	0.000730693	0.000799787	0.00172479	0.00346497	0.00424123	0	0.00409234	0.000576461
ZOTU7475	1.33e-05	8.37e-05	0	0	7.97e-05	0.000612813	0.00155103	0.000880297	0.000817941	0	0	0	0	0	0	0	0	0	4.4e-05	0.000340885	0	0	0	0	0	0	0	0	0.000235555	0.000306804	0.000699872	0.00158671	0	0	0.000253684	0.000394859	0.00105513	0.000239521	0.000207173	6.65e-05	0	0	0	0	0	0	0	0	0
ZOTU7184	4e-05	6.28e-05	0	0	1.59e-05	0.000181058	0.000218455	0.000863036	0.00079892	1.64e-05	0	0	0	0	0	0	0	0.000223329	8.79e-05	0	0	0	0	0	0	0	0	0	5.05e-05	0.00039704	0.000443252	0.000776476	3.96e-05	0	0.000274824	0.00144123	0.000667528	0.00230309	0.00029925	0.000199477	6.14e-05	0	0	0	0	0	0	0	0
ZOTU4757	0	0	0	0	0	0	0	0.000345214	0.00100816	0	0	0	0	0	0	0	0	0	0	0	0	0	0	0	0	0	0	1.91e-05	0	0.000342898	7e-05	0.000135039	0	0	0	1.97e-05	0	0	0.00534045	0.00332461	0.00161581	0.0036722	0.00243744	0.00352523	0	0	0	5.51e-05	1.99e-05
ZOTU1539	1.33e-05	0	0	0	0.00114759	9.75e-05	0	0	0	0	0	0	0	0	0	0	0	0	0	0	0	0	1.64e-05	0.000219443	0	0	0	0.00410729	0.000807619	0.00108284	0	0	0.00194025	0	2.11e-05	0	0	0	0	0	0	0	0	0	0	0	0	0	0
ZOTU1149	0	0.00866127	0.000668288	0	0	0	0	0	0	0	0	0	0	0	0	0	0	0	0	0	0	0.000101133	1.64e-05	0	0	0	0	0	0	0	0	0	0	0	0	0	0	0	0	0	0	0	0	0	0	0	0	0	0
ZOTU4445	0	0	0	0	0	0	0	0	9.51e-05	0	0	0	0	0	0	0	0	0	0	0	0	0	0	0	0	0	0	0	0	0	0	0	0	0	0	0	0	0	0	0	0	0	0	0	0	0.00543258	0.00718419	0.00121119	0.000576461
ZOTU4265	0	2.09e-05	0	0	0	0	0	0	0	0	0	0	0	0	0	0	1.69e-05	0	0	0	0	0	1.64e-05	0	0	0	0.00931752	0	0	0	0	0	0	0	0	0	0	0	0	0	0	0	0	0	0	0	0	0	0
ZOTU3300	2.66e-05	0	0	0	0.0016417	0.000710306	2.18e-05	0	0	0	0	0	0	0	0	0	0	0	0	0	0	0	0	0	0	0	0	0.00175754	0.00180032	0.00110088	0	0	0.00229662	0	0	0	0	0	0	0	0	0	0	0	0	0	0	0	0
ZOTU1885	0	6.28e-05	0	0	0.00162576	0.000988858	0.00128889	0.000103564	0	1.64e-05	0	0	0	0	0	0	0	0.000120254	0	0	0	0	0	0	3.36e-05	0	0	0.0010507	0.00106	0.000487277	0.000116645	0	0.00142549	2.15e-05	0.000465087	9.87e-05	0.000387597	0	0	0	0	0	0	0	0	0	0	0	0
ZOTU1100	0	0	2.67e-05	0	0	0	0	1.73e-05	0.000342394	0	0	0	0	0	0	0	0	0	0	0	0	0	0	0	0	0	0	0	0	0	0	0	0	0	0	3.95e-05	0	0	2.3e-05	0.000288133	0.000388612	0.0015738	0.00458925	0	0.00125366	0.000262098	0	0.000385378	0.0109329
ZOTU4574	0	0	0	0	0	0	0	0	3.8e-05	0	0	0	0	0	0	0	0	0	6.59e-05	0	0	0	0	0	0	0	0	0	0	0	0	0	0	0	0	5.92e-05	0	0	0.00027623	0.000288133	0.00179988	0.00103046	0.00140915	0.000121038	0.000261178	0	0	0.000367026	0.000755362
ZOTU3174	0	0.000104605	0	0	1.59e-05	8.36e-05	0.000240301	0.000690429	0.000779898	0	0	0	0	0	0	0	0	0	0	0	0	0	0	0	0	0	0	0	0	0.000180473	0.000303278	0.000405118	0	0	0	0.000355373	0.000387597	0.000294795	0.00057548	0.000354626	0.000899943	0.000693221	0.00215181	0.0015281	0.000330826	0.00152494	0.000539427	0.00124789	0.00200767
ZOTU11711	2.66e-05	0	0	0	3.19e-05	0.000431755	6.55e-05	3.45e-05	7.61e-05	0	0	0	0	0	0	0	8.47e-05	0.00020615	4.4e-05	0	0	0	0	0	0	0	0	9.55e-05	0.00139651	0.000613608	0.000116645	3.38e-05	0.000237581	0.00210857	0.00188149	0.000513317	0.00122739	0	2.3e-05	2.22e-05	0	0	0	0	0	0	0	0	0
ZOTU4737	0.000133188	4.18e-05	0	0	0.000255021	0.000139276	0.000305837	0.000327954	0.000152175	0.000475628	0.000419328	0	0	0	0	0	5.08e-05	0.0004123	2.2e-05	0	0	6.74e-05	0	0	0	0	0	0.000515799	0.000117778	0.000162426	0.000186632	0.000405118	0.00146509	0.000193644	0.000739911	0.000355373	0.000172265	0.00132658	0.000690576	0.000110821	2.05e-05	0	0	0	0	0	0	0	0
ZOTU13814	0	0	0	0	0.000430347	0.000905292	0.00126704	0.000793993	3.8e-05	0	0	0	0	0	0	0	1.69e-05	0	0	0	0	0	0	0	0	0	0	0.00042028	0.00100952	0.000631655	0.00137641	0.000708956	0.000158388	0.000279708	0.000274824	0.000513317	0.000301464	0.000128973	0	0	0	0	0	0	0	0	0	0	0
ZOTU3504	0	0	0	0	0	0	0	0.000155347	0.000855985	0	0	0	0	0	4.79e-05	0	0	0	0	0	0	0	0	0	0	0	0	1.91e-05	0	7.22e-05	4.67e-05	6.75e-05	0	0	0	0.000197429	0	3.68e-05	0.000460384	0.00188395	0.000449971	0.000299771	0.000875957	0.00334367	0.0011666	0.00173938	0.00436446	0.00168832	0.000238535
ZOTU3229	0	0	0	0	0.00180108	0.000320334	0	0	0	0	0	0	0	0	0	0	0	0	0	0	0	0	0	0	0	0	0	0.0020823	0.00185079	0.00106479	0	0	0.00186105	0	0.000253684	0	0	0	0	0	0	0	0	0	0	0	0	0	0
ZOTU7115	4e-05	0	0	0	0.00105196	0.000181058	0	0	0	1.64e-05	0	0	0	0	0	0	0	5.15e-05	0	0	0	0	0	0	0	0.00390024	0	0.00215871	0.000353333	0.000523371	0	0	0.000930527	0	2.11e-05	0	0	0	0	0	0	0	0	0	0	0	0	0	0
ZOTU12076	0.000439519	8.37e-05	2.67e-05	0	0.000510041	0.000543175	0	0.000293432	0.000114131	3.28e-05	0	0	0	0	0	0	0.000423313	0.000257688	0	0	0	0	0	0	0	0	0	0.00042028	0.000942222	0.00059556	0.000116645	0.000573917	5.94e-05	0.000925189	6.34e-05	0.00053306	0.000236865	0.00200829	2.3e-05	0	0	0	0	0	0	0	0	0	0
ZOTU12211	0	0	0	0	0	0	0	0.000103564	9.51e-05	0	0	0	0	0	0	0	0	0	0	0	0	0	0	0	0	0	0	0	0	3.61e-05	4.67e-05	6.75e-05	0	0	0	0.000118458	0	7.37e-05	0.000322269	0.000531938	0.000245439	0.000299771	0.000552234	0.000105908	0.000313414	0.00748171	0	0.000330324	0.000437315
ZOTU2664	0	0.00401682	0	0	0	0	0	6.9e-05	0.000209241	0	0	0	0	0	0	0	0	3.44e-05	0.000527496	0.00649102	0.00160769	1.69e-05	0	0	0	0	0	0	0	1.8e-05	7e-05	0	0	0	0	7.9e-05	2.15e-05	0	0.00273929	0.00101955	0.000981756	0.0020984	9.52e-05	0	0	0.00016679	7.36e-05	1.84e-05	0
ZOTU2144	0.00398231	0.000125526	0	0	0	0	0	0	0	0.000541232	0	0	0	0	0	0	5.08e-05	0	0	0	0	0.00102818	0.00243807	0.000676615	0.000335841	0	0	0	0	0	0	0	0	0	0	0	0	0	0	0	0	0	0	0	0	0	0	0	0
ZOTU2556	0	2.09e-05	2.67e-05	0	0	0	0	0	0	0.000639638	0.00448681	0.00398942	0	0	0	0	0	0	0	0	0	0	0	0	0	0	0	0	0	0	0	0	0	0	0	0	0	0	0	0	0	0	0	0	0	0	0	0	0
ZOTU984	2.66e-05	0	0	0	0	0	0	0	0	0.000934855	0.000573082	0	0	0	0	0	3.39e-05	0.00393403	0.00364851	0	0	0	0	0	0	0	0	0	0	0	0	0	0	0	0	0	0	0	0	0	0	0	0	0	0	0	0	0	0
ZOTU12453	0	0	0	0	1.59e-05	9.75e-05	0.000109228	0.000500561	0.000551635	0	0	0	0	0	0	0	0	3.44e-05	6.59e-05	0	0	0	0	0	0	0	0	0	0	5.41e-05	0.000443252	0.000101279	0	0	4.23e-05	0.000256658	0.000107666	0.00058959	0.000437365	0.000398954	0.000143173	0.000355979	0.000133298	0.000469022	0.000818359	4.77e-05	0	0.000715701	0.00264377
ZOTU3426	0	0.000104605	0.00387607	0.00475989	0	0	0	0	0	0	0	0	0	0	0	0	0	0	0	0	0	0.00037082	1.64e-05	0	0	0	0	0	0	0	0	0	0	0	0	0	0	0	0	0	0	0	0	0	0	0	0	0	0
ZOTU13885	7.99e-05	0.000313814	0	0	0.000494103	0.000194986	0.000939357	0.000293432	0.00030435	4.92e-05	0	0	0	0	0	0	6.77e-05	0.00020615	0.000329685	0.000880619	0	0	0	0	0	0	0	3.82e-05	0.000201905	0.000162426	0.000209962	0.000270079	3.96e-05	0.00129096	0.000761051	0.000394859	0.000279931	0.000350069	0.000207173	0.000310297	0.000122719	0.000243564	3.81e-05	3.03e-05	0	0	0	0	0
ZOTU4500	0	2.09e-05	2.67e-05	0	0	0	0	0	0	0	0	0	0	0	0	0	0	0	0	0	0	0.00893339	0.00011454	0	0	0	0	0	0	0	0	0	0	0	0	0	0	0	0	0	0	0	0	0	0	0	0	0	0
ZOTU7048	5.33e-05	2.09e-05	0	0	0.00148231	0.000236769	0	0	3.8e-05	0	0	0	0	0	0	0	6.77e-05	0.000223329	0	0	0	3.37e-05	0	0	0	0	0	0.00227334	0.00137968	0.0010287	0	3.38e-05	0.00170267	0	0.000443946	3.95e-05	0	0	0	0	0	0	0	0	0	0	0	0	0
ZOTU4228	0	0	0	0	0	0	0	0	0	0.000738044	0.00406748	0.00424272	0	0	0	0	0	0	0	0	0	0	0	0	0	0	0	0	0	0	0	0	0	0	0	0	0	0	0	0	0	0	0	0	0	0	0	0	0
ZOTU2076	0.000133188	0	0	0	0	0	0	0	0	0	0	0	0	4.28e-05	0	0	1.69e-05	0	0	0	0	8.43e-05	0.000163629	0	0	0	0.00859148	0	0	0	0	0	0	0	0	0	0	0	0	0	0	0	0	0	0	0	0	0	0
ZOTU641	0	0	0	0	1.59e-05	0	0	0.000155347	0.000646744	0	0	0	0	0	0	0	0	0	0	0.000156239	0	0	0	0	0	0	0	0	0	3.61e-05	4.67e-05	0.000101279	0	0	0	0.000177687	0	7.37e-05	0.0021638	0.0034576	0.00337478	0.00290404	0.00133298	0.00281413	0.000574593	0.000119136	0	0.00133965	0.000178902
ZOTU1218	0	0	0.00173755	0.00709093	0	0	0	0	0	0	0	0	0	0	0	0	0	0	0	0	0	5.06e-05	0.00011454	0	0	0	0	0	0	0	0	0	0	0	0	0	0	0	0	0	0	0	0	0	0	0	0	0	0
ZOTU13230	0	6.28e-05	0	0	1.59e-05	0.000334262	4.37e-05	0.0004833	7.61e-05	0	0	0	0	0	0	0	0	8.59e-05	0	0	0	0	0	0	0	0	0	0	1.68e-05	0.000126331	0.000139974	0.000236319	0	0	0.000105702	0.000138201	0.000624462	5.53e-05	0.000437365	0.00181746	0.00239303	0.000861843	0.000247553	0.000680838	0	0	0	0	0
ZOTU1668	0	8.37e-05	0	0	9.56e-05	0.000320334	0.000655365	0.000500561	0.000133153	3.28e-05	0	0	0	0	0	0	3.39e-05	3.44e-05	2.2e-05	0	0	0	0	0	0	0	0	0	5.05e-05	5.41e-05	0.000139974	0.000236319	0	0	0.000105702	0.000375116	0.000236865	0.000608015	0.000506422	0.000332462	0.000613597	0.00114288	0.00217085	7.56e-05	3.48e-05	0	0	0.000385378	0
ZOTU3162	4e-05	0.000271972	0	0	4.78e-05	0.000487465	0.000283992	0.000655907	7.61e-05	1.64e-05	0	0	0	0	0	0	0	0.000498196	6.59e-05	0	0	0	0	0	0	0	0	5.73e-05	0.000353333	0.000270709	0.000629885	0.000810236	1.98e-05	0.000172128	0.000909033	0.00114509	0.000322997	0.000368494	9.21e-05	0.000110821	0	3.75e-05	3.81e-05	4.54e-05	0.000539769	0.000357407	0	0.000238567	0
ZOTU1432	0.000119869	0.000146447	2.67e-05	0	0.00245457	0.00107242	4.37e-05	0	7.61e-05	1.64e-05	0	0	0	0	0	0	0.000101595	0.00139151	2.2e-05	0	0	0	4.91e-05	0	0	0	0	0.00149008	0.000942222	0.000649702	9.33e-05	3.38e-05	0.000197985	0	0	0	0	0	0	0	0	0	0	0	0	0	0	0	1.99e-05
ZOTU2318	0	0	0	0	0	0	0	0	0	0	0	0	0	0	0	0	0	0	0	0	0.000328845	0	0	5.49e-05	0	0.00188169	0.00665537	0	0	0	0	0	0	0	0	0	0	0	0	0	0	0	0	0	0	0	0	0	0
ZOTU7873	2.66e-05	0	0	0	7.97e-05	0	0	0	0	1.64e-05	0	0	0	0	0	0	1.69e-05	1.72e-05	0	0	0	0	0	0	0	0	0.00798645	5.73e-05	0.000201905	0.000144378	0	0	0.000158388	0	0.000211403	0	0	0	0	0	0	0	0	0	0	0	0	0	0
ZOTU9859	0	0	0	0	0.00250239	0.000626741	0	0	0	0	0	0	0	0	0	0	1.69e-05	0	0	0	0	0	0	0	0	0	0	0.00213961	0.00139651	0.00119112	0	0	0.000871132	0	4.23e-05	0.000118458	0	0	0	0	0	0	0	0	0	0	0	0	0
ZOTU2554	0	0	0	0	0	1.39e-05	0	0.000138086	0.000380438	0	0	0	0	0	0	0	0	0	0	0	0	0.000151699	0	0	0	0	0	1.91e-05	1.68e-05	0	0	6.75e-05	0	0	0	0.00033563	0	0.000110548	0.000713595	0.00106388	0.000224986	1.87e-05	3.81e-05	0.00441788	0.000104471	0	0	0.00108273	0
ZOTU9786	0	0.000104605	0	0	0.000446286	0.000431755	0	0	0	0	0	0	0	0	0	0	0	1.72e-05	0	0	0	0	0	0	0	0	0	0.000229244	0.000622539	0.000360946	0.00025662	6.75e-05	0.0013265	0	0.00372069	1.97e-05	0.00088286	0.000386918	0	2.22e-05	0	0	0	0	0	0	0	0	0
ZOTU11356	0	0	0	0	0.00012751	0.000181058	4.37e-05	0	1.9e-05	0	0	0	0	0	0	0	0	0	4.4e-05	0	0	0	0	0	0	0	0	0.000133726	0.00163206	0.00106479	0	0	0.000534558	0.000150612	0.00481999	0.000138201	0	0	0	0	0	0	0	0	0	0	0	0	0
ZOTU9512	0	0	0	0	4.78e-05	0.000153203	0.000830129	0.000552343	0.000247285	0	0	0	0	0	0	0	0	5.15e-05	2.2e-05	0	0	0	0	0	0	0	0	9.55e-05	0.000723492	0.000613608	0.0012831	0.000979035	0.000217783	0.000580933	0.000317105	0.000592288	0.000710594	0.000534316	0.000161134	0	0.000102266	0	0	4.54e-05	0	0	0	0	0
ZOTU7731	2.66e-05	0.00343103	0.00122965	0.000277117	0	0	0	0	0	0	0	0	0	0	0	0	0	0	0	0	0	0.000792206	0	0	0	0	0	0	0	0	0	0	0	0	0	0	0	0	0	0	0	0	0	0	0.00121883	0.00104839	0	0	0
ZOTU11497	0.000332969	0.000125526	0	0	0.000255021	0.0004039	0.000109228	0.00122551	0	0.000541232	0.0009365	0	0	0	0	0	0.00104981	0.0004123	2.2e-05	0	0	5.06e-05	0	0	0	0	0	0.00021014	0.000706666	0.000559466	2.33e-05	0.000337598	0.000593954	0.000129096	0.000591929	0.000236915	0	0	0	0	0	0	0	0	0	0	0	0	0
ZOTU3614	0	0	0	0	0	4.18e-05	0.000131073	0.000552343	0.00146469	0	0	0	0	0	0	0	0	0	0.000109895	0	0	0	0	0	0	0	0	0	1.68e-05	0.000324851	0.000279949	0.000438878	1.98e-05	0	2.11e-05	0.000473831	0.000150732	0.000221096	0.00253211	0.00288133	0.00224986	0.00282909	0.00205659	0.00177018	0.000261178	0	0	0.000458783	0
ZOTU4578	0	0	0	0	0	1.39e-05	2.18e-05	0.000172607	0.000475547	0	0	0	0	0	0	0	0	0	0	0	0	0	0	0	0	0	0	1.91e-05	0	0.000216567	2.33e-05	6.75e-05	0	0	2.11e-05	0.000177687	0	0	0.00145021	0.000199477	0.00143173	0.000843107	0.00146628	0.00434223	0.000800947	0.000714813	0	0.00523013	0.000457193
ZOTU2801	0	0	0	0	0	0	0	0	0	0	0	0	0	0	0	0	0	0	0	0	0	0	0	0	0	0	0	0	0	0	0	0	0	0	0	0	0	0	0	0	0	0	0	0	0	0.00181086	0.00367791	0	0
ZOTU13477	0.00075917	0.00023013	0	0	0.000765062	0.000334262	0.000393219	0.000103564	0.000779898	0	0	0	0	0	0	0	0.000558773	0.0004123	0.000175832	0	0	0	0	0	0	0	0	0.000248348	0.000622539	0.00039704	0.000326607	0.000135039	9.9e-05	0.000408804	0.000126842	0.000473831	0.000645995	0.000184247	0.000322269	0.000177313	4.09e-05	0	0	4.54e-05	0	0	0	0	0
ZOTU7611	0	0	0	0	0	0.000236769	0.000983048	0.00117373	0.00117936	0	0	0	0	0	0	0	0	0	0	0	0	0	0	0	0	0	0	0	0	0.00019852	0.000793188	0.000641437	0	0.000150612	0.000211403	0.000394859	0.00103359	0.000442193	0.00057548	0.000265969	6.14e-05	0.00013115	7.62e-05	7.56e-05	0	0	0	0.000110108	0
ZOTU3714	0	0	0	0	3.19e-05	6.96e-05	4.37e-05	0.000414257	0.00117936	0	0	0	0	0	0	0	0	0	0	0	0	0	0	1.83e-05	0	0	0	0	1.68e-05	0.000378993	0.000373265	0.000506397	0	0	4.23e-05	0.000829204	8.61e-05	0.00162137	0.000759634	0.000465446	0.00116584	0.000318507	0.0011616	0.00161888	0.000174119	0.00193	0	0.00222051	0
ZOTU11549	0.000199782	0.00225946	2.67e-05	0	3.19e-05	0.000236769	0.00126704	3.45e-05	1.9e-05	0.000213213	0.000139776	0	0	0	0	0	6.77e-05	0.000773063	0.000967075	0	0	0.00119674	0.000147266	0	0	0	0	0	0.000252381	5.41e-05	0.000186632	3.38e-05	0.000178186	0.00021516	0.000147982	7.9e-05	0	0	0	0	0	0	0	0	0	0	0	0	0
ZOTU1227	5.33e-05	0	0	0	0.00133886	0.000306407	0	0	0	1.64e-05	0	0	0	0	0	0	0.000101595	0.00020615	0	0	0	0	1.64e-05	0	0	0	0	0.00271272	0.00137968	0.00140769	0	0	0.00089093	0	0.000295964	0	0	0	0	0	0	0	0	0	0	0	0	0	0
ZOTU12809	0	0	0	0	0	0	0	6.9e-05	0.000608701	0	0	0	0	0	0	0	0	0	0	0	0	0	0	0	0	0	0	0	0	0.000162426	4.67e-05	0.000168799	0	0	4.23e-05	0.000118458	2.15e-05	0.000128973	0.000736614	2.22e-05	0	0	0	0.0046297	6.96e-05	0.000309752	0	0.001358	7.95e-05
ZOTU12213	0.000186463	0.000188288	0	0	0.00165763	0.000278552	0	0	1.9e-05	6.56e-05	2.8e-05	0	0	0	0	0	0.000101595	0.000188971	0	0	0	0	0	0	0	0	0	0.00225423	0.000673015	0.000288757	2.33e-05	0	0.0026134	0	0.000126842	0	0	0	0	0	0	0	0	0	0	0	0	0	0
ZOTU13579	0	0	0	0	0	0	0	1.73e-05	1.9e-05	0	0	0	0	0	0	0	0	0	0	0	0	0	0	0	0	0	0	0	0	0	0	0	0	0	0	0	0	0	0.000690576	0.00115253	0.00386566	0.000861843	0.00198042	4.54e-05	3.48e-05	0	0	1.84e-05	0
ZOTU3629	0	2.09e-05	0	0	0	4.18e-05	2.18e-05	8.63e-05	0.000114131	0	0	0	0	0	0	0	0	0	0	0	0	0	0	0	0	0	0	1.91e-05	1.68e-05	5.41e-05	9.33e-05	3.38e-05	0	0	0	3.95e-05	0.000279931	0	0.00145021	0.0014185	0.00165671	0.00318507	0.000894999	0.00157349	0.000975066	0.00033358	0	0.000935917	0.00457193
ZOTU1357	0	0	0	0	0	0	0	0	0	0	0	0	0	0	0	0	0	0	0	0	0	0.00225863	0.0021599	0.000310877	0.000873186	0.00294228	0.000121007	0	0	0	0	0	0	0	0	0	0	0	0	0	0	0	0	0	0	0	0	0	0
ZOTU2728	0	0	0	0	0	0	0	1.73e-05	0.000152175	0	0	0	0	0	0	0	0	0	0	0	0	1.69e-05	0	0	0	0	0	0	0	0	0	3.38e-05	0	0	0	0	0	0	0.000161134	4.43e-05	0.000224986	0.000487129	0.00131394	0.00706559	0.00235061	0.000142963	0	0.00500991	0.00105353
ZOTU1538	0	0	0	0	0	0	0	0	0	0	0	0	0	0	0	0	0	0	0	0	0	0	0	0	0	0	0	0	0	0	0	0	0	0	0	0	0	0	2.3e-05	0	0	3.75e-05	0	0	5.22e-05	0.00150111	0.00286877	1.84e-05	0
ZOTU1134	0	0.000690391	0	0	0	0	0	5.18e-05	0.000323372	0	0	0	0	0	0	0	0	0	0	0	0	0	0	0	0	0	0	0	0	7.22e-05	0	3.38e-05	0	0	0	7.9e-05	0	1.84e-05	0.00241702	0.00243805	0.0018817	0.00425301	0.00253266	4.54e-05	0.000574593	0	0	0.000110108	0.00248474
ZOTU1181	0	0	0	0	0	1.39e-05	2.18e-05	1.73e-05	0	0	0	0	0	0	0	0	0	0	0	0	0	0	0	0	0	0	0	0	0	0	0	0	0	0	2.11e-05	5.92e-05	0	0	0	0	0	0	0	0	0.00846218	0	0	0	0
ZOTU3257	0	0	0	0	0	0	0	0	0	0	0	0	0	0	0	0	0	0	0	0	0.000127884	0	0	0	0	0.00229224	0.00617135	0	0	0	0	0	0	0	0	0	0	0	0	0	0	0	0	0	0	0	0	0	0
ZOTU3772	0	6.28e-05	0	0	0	2.79e-05	0	0.000172607	0.000646744	0	0	0	0	0	0	0	0	0	0	0	0	0	0	0	0	0	0	0	0	1.8e-05	7e-05	0.000101279	0	0	0	0.000138201	0	0	0.00151927	0.00350193	0.00177943	0.00148012	0.00270404	0.000166427	0.000905419	0	0	0.00401894	0.000218657
ZOTU6685	0	0	0	0	0	0	0	0	0	0	0	0	0	0	0	0	0	0	0	0	0	0	0	0	0	0	0	0	0	0	0	0	0	2.15e-05	0	0	0	0	0	0	0	0	0	0.000166427	0	0.00190617	0	0.000495486	7.95e-05
ZOTU9918	0	0.000188288	0	0	4.78e-05	0.000264624	0.000480601	0.000207129	0.000171197	0	0	0	0	0	0	0	0	5.15e-05	0.000351664	0.00048292	0.000694229	0	0	0	0	0	0	3.82e-05	0.000151428	0.000306804	0.000233291	0.000202559	1.98e-05	0.00010758	8.46e-05	0.000315887	0.000968992	0.000792262	0.00029925	0.000664923	0.000327252	0.000337243	0.000133298	0.000378243	0.000104471	7.15e-05	0	3.67e-05	0
ZOTU4443	0	0	0	0	0	0	0	0	1.9e-05	0	0	0	0	0	0	0	0	0	0	0	0	0	0	0	0	0	0	0	0	0	0	0	0	0	0	0	0	0	0	8.87e-05	2.05e-05	3.75e-05	1.9e-05	0	0.00381321	0.000524196	0	0.00220216	0.00779216
ZOTU1304	0	0	0	0	0	0	0	0	0	0	0	0	0	0	0	0	0	0	0	0	0	0.00478695	0.00132539	0.000658328	0.000201505	0	0.00157309	0	0	0	0	0	0	0	0	0	0	0	0	0	0	0	0	0	0	0	0	0	0
ZOTU2705	0	0	0	0	0	2.79e-05	0	0.000276172	0.000913051	0	0	0	0	0	0	0	0	1.72e-05	2.2e-05	0	0	0	0	0	0	0	0	0	0	0.000252662	2.33e-05	0.000135039	0	0	0	0.000197429	0	0.000110548	0.00128907	0.000820072	0.00110447	0.00101173	0.000818829	0.00108934	0.00104471	0.000428888	0.00186348	0.00128459	0.000238535
ZOTU7193	0	0	0	0	0.0016417	0.000431755	0	0	0	0	0	0	0	0	0	0	0	0	0	0	0	0	0	0	0	0	0	0.00227334	0.00173302	0.00119112	0	0	0.000970124	0.00010758	0.000190263	0	0	0	0	0	0	0	0	0	0	0	0	0	0
ZOTU10985	0	0	0	0	0	0	0	0	0	0.00647838	0.00127196	0	0	0	0	0	5.08e-05	0.000721526	0	0	0	0	0	0	0	0	0	0	0	0	0	0	0	0	0	0	0	0	0	0	0	0	0	0	0	0	0	0	0
ZOTU11463	1.33e-05	0.000125526	0	0	0.00027096	0.000543175	0.000415065	0.000604125	0.000209241	0	0	0	0	0	0	0	1.69e-05	3.44e-05	6.59e-05	0	0	1.69e-05	0	0	0	0	0	0.000133726	0.000538412	0.000613608	0.00074653	0.000979035	0.000138589	0.000753061	0.000232543	0.000236915	0.000559862	0.00090281	4.6e-05	0.000110821	0	3.75e-05	9.52e-05	4.54e-05	0	0	0	0	0
ZOTU1164	0	0	0	0	0	0.000208914	0.000327683	0.000172607	0.000285328	0	0	0	0	0	0	0	0	1.72e-05	4.4e-05	0	0	0	0	0	0	0	0	0	0.000100952	0.000649702	0.000933162	0.000371358	0	0	0.000126842	9.87e-05	0.000753661	0.000976509	9.21e-05	0.000221641	0	0	0	0	0	0	0.0117448	0	0
ZOTU1446	0	0	0	0	0	5.57e-05	2.18e-05	0.000569604	0.00144566	0	0	0	0	0	0	0	0	0	0	0	0	0	0	0	0	0	0	0	0	0.000108284	0.000419923	0.000337598	0	0	2.11e-05	0.000473831	0.000430663	0.000571165	0.00085171	0.000842236	0.000490878	0.000843107	0.000914042	0.00154323	0.000661652	0.000262098	0	0.000385378	0.000238535
ZOTU9839	7.99e-05	4.18e-05	0	0	0.000653491	0.00208914	0.000546138	0.000207129	9.51e-05	0.00034442	0.000125798	0	0	0	0	0	0.000169325	0.000601271	6.59e-05	0	0	0	0	0	0	0	0	0.000439384	0.000538412	0.000451182	0.000209962	0.000135039	0.000158388	0.000150612	0.000190263	0.000296144	0	0.000608015	9.21e-05	6.65e-05	2.05e-05	1.87e-05	0	3.03e-05	0	0	0	0	0
ZOTU2207	0	0	0	0	0	0	0	0	0	0	0	0	0	0	0	0	0	0	0	0	0.000328845	0	0	0	0	0	0.00806712	0	0	0	0	0	0	0	0	0	0	0	0	0	0	0	0	0	0	0	0	0	0
ZOTU14067	0.0002131	6.28e-05	0	0	0.000414409	0.000194986	0	1.73e-05	1.9e-05	8.2e-05	0.000167731	0	0	0	0	0	0.00104981	0.000377942	0	0	0	0.000117988	3.27e-05	0	0	0	0	0.000859665	0.00065619	0.000685797	2.33e-05	6.75e-05	0.0012275	0.00154915	0.000486227	7.9e-05	0	0	0	0	0	0	0	0	0	0	0	0	0
ZOTU7878	0	0	0	0	0	1.39e-05	0.000349528	0.00094934	0.00136958	0	0	0	0	0	0	0	0	0	0	0	0	3.37e-05	1.64e-05	0	0	0	0	3.82e-05	0	0.000216567	0.000653214	0.000472638	0	0	2.11e-05	0.000118458	0	0.000442193	0.000920768	0.00037679	0.000286345	0.000936786	0.000837872	0.000211816	0	0	0	9.18e-05	0
ZOTU12315	0	0	0	0	0	0	0.000611674	0.00072495	0.000779898	0	0	0	0	0	0	0	0	0	8.79e-05	0	0	0	0	0	0	0	0	0	1.68e-05	0.000252662	0.00100315	0.000776476	0	0	0	0.000394859	0	0.000479042	0.000667557	0.000598431	0.000552238	0.000299771	0.000171383	0.000226946	0.000243767	0	0	0.000458783	0
ZOTU13757	0.000186463	6.28e-05	0	0	0.000191266	0.00086351	0.00150734	0.000621386	1.9e-05	0.00108246	0.000181709	0	0	0	0	0	0.000457178	0.000498196	0.000615412	0	0	6.74e-05	0	0	0	0	0	1.91e-05	0.000302857	0.00019852	0.000863175	0.000270079	0	0.000193644	8.46e-05	5.92e-05	0	0	0	0	0	0	0	0	0	0	0	0	0
ZOTU1695	0	0	0	0	1.59e-05	0.000194986	0.000240301	0.00024165	0.000361416	3.28e-05	0	0	0	0	0	0	0	6.87e-05	0	0	0	0	0	0	0	0	0	5.73e-05	0.000168254	0.000126331	0.0012831	0.00121535	0	0	0.000803332	0.00284298	0	0.000552741	2.3e-05	0.000110821	0	0	0	0	0	0	0	0	0
ZOTU7103	1.33e-05	0.000104605	0	0	0.000350653	0.000543175	0.000917511	0.00094934	0.000114131	1.64e-05	0	0	0	0	0	0	1.69e-05	0.000137433	8.79e-05	0	0	0	0	0	0	0	0	0.000152829	0.000235555	0.000216567	0.000769859	0.000337598	1.98e-05	8.61e-05	0.000190263	0.000967404	0.00150732	0.000128973	6.91e-05	4.43e-05	2.05e-05	0	0	1.51e-05	0	0	0	0	0.000318047
ZOTU11253	0	8.37e-05	0	0	3.19e-05	0.000543175	0.000808284	0.00143264	0.00119838	0	0	0	0	0	0	0	1.69e-05	0.000120254	0.000725307	0.000809602	0.00179038	0	0	0	0	0	0	3.82e-05	3.37e-05	0.00066775	0.000886504	0.00121535	0	0	0.000274824	0.00213224	0.000753661	0.000534316	0.00103586	0.00106388	2.05e-05	0.000487129	3.81e-05	0	0	0	0	0	0
ZOTU2167	4e-05	0.000209209	0	0	7.97e-05	0.000487465	0.000502447	0.000897558	0.000418482	0	0	0	0	0	0	0	1.69e-05	3.44e-05	0.000109895	0	0	0	0	0	0	0	0	9.55e-05	0.000521587	0.000505324	0.000863175	0.000708956	0	0	0.000147982	0.00086869	0.00109819	0.000442193	9.21e-05	4.43e-05	2.05e-05	0	0	0.000105908	0	0	0	1.84e-05	0
ZOTU11059	0	0.000251051	0	0	0	0.000222841	0.000349528	0.00070769	0.0010462	0	0	0	0	0	0	0	0	6.87e-05	0.000109895	0	0	0	0	0	0	0	0	1.91e-05	0	0.000108284	0.000116645	0.000573917	0	0	2.11e-05	0.000473831	0.00047373	0.000976509	0.00105888	0.0022829	0.00112493	0.00106794	0.00142819	0.000680838	0.000626828	0.00121518	0.000637505	0.000660647	7.95e-05
ZOTU3404	0.00519432	0.000857759	2.67e-05	0.000521631	0	0	0	0	0	6.56e-05	0.000279552	0	0	0	0	0	0.000372515	6.87e-05	0	0	0	0.000455097	0.00045816	0	0	0	0	1.91e-05	0	0	0	0	0	0	0	0	0	0	0	0	0	0	0	0	0	0	0	0	0
ZOTU412	0	0	0	0	0	0	0	0	0	0	0	0	0.00808135	0	0	0	0	0	0	0	0	0	0	0	0	0	0	0	0	0	0	0	0	0.000236676	0	0	0	0	0	0	0	0	0	0	0	0	0	0	0
ZOTU5333	0	0	0	0	0	0	0	8.63e-05	0.000741854	0	0	0	0	0	0	0	0	0	0	0	0	0	1.64e-05	0	0	0	0	0	0	1.8e-05	0	3.38e-05	0	0	0	0	0	0	0.000966806	0.00254887	0	0	0.000190425	0.00325289	0.00437039	4.77e-05	0	0.00385378	0.000337925
ZOTU1178	0	4.18e-05	0	0	0	0	0	0	0	0	0	0	0	0	0	0	0	1.72e-05	0	0.00154819	0.00670479	0	0	0	0	0	0	0	0	0	0	0	0	0	0	0	0	0	0	0	0	0	0	0	0	0	0	0	0
ZOTU3384	0	0	0	0	0	0	0	0	0	0	0	0	0	0	0	0	0	0	0	0	0	0	0	0	0	0	0	0	0	0	0	0	0	0	0	0	0	0	0	0	0	0	0	0	0	0.0044795	0.00284425	3.67e-05	0
ZOTU5270	2.66e-05	0.00023013	0	0	0.000143449	0.000571031	0.00146365	0.000396997	0.000342394	0	0	0	0	0	0	0	0	3.44e-05	0.000197811	0	0	0.000101133	3.27e-05	0	0	0	0	9.55e-05	0.000168254	0.000216567	0.000373265	0.000607677	0	0.000387288	0.000317105	0.000612031	0.000925926	0.00058959	9.21e-05	8.87e-05	0.000102266	0.00013115	3.81e-05	0	0	0	0	0	0
ZOTU1186	0	2.09e-05	0	0	0	0	0	0	7.61e-05	0	0	0	0	0	0	0	0	0	0	0	0	0	0	0	0	0	0	0	0	0	2.33e-05	6.75e-05	0	0	0	0	2.15e-05	3.68e-05	0.000207173	4.43e-05	8.18e-05	0.000562071	0.000552234	0.00108934	0.000696476	0.000285925	0.00134857	0.00113778	0.000198779
ZOTU1270	1.33e-05	0.00715496	0.000213852	0	0	0	0	0	0	0	0	0	0	0	0	0	0	0	0	0	0	0.000421386	0.000278169	0.000128008	0	0	0	0	0	0	0	0	0	0	0	0	0	0	0	0	0	0	0	0	0	0	0	0	0
ZOTU4954	0.000492795	0.000313814	0	0	0	0.000167131	4.37e-05	0.000224389	0.000228263	0	0	0	0	0	0	0	0.000965153	0.000721526	0.000307706	0.000738584	0.000529806	0.000488808	0.00022908	0.00023773	0	0	0	0	0	0.000234615	0.000139974	0.000135039	3.96e-05	0.000236676	0.000190263	5.92e-05	0	0.00136343	4.6e-05	4.43e-05	0	0	0	0	0	0	0	0	0
ZOTU14166	0	2.09e-05	0	0	1.59e-05	0.00051532	0.000305837	0.00108743	0.000684788	0	0	0	0	0	0	0	0	0.00020615	0.00259352	0	0	0	0	0	0	0	0	1.91e-05	0.000201905	0.000577513	0.00104981	0.00111407	0	0	6.34e-05	0.000473831	0.00200258	0.00108706	0.000322269	0.000509774	0	0	0	0.00216355	0.000888007	0	0	0.00042208	0
ZOTU1173	0.000119869	6.28e-05	0	0	0	0	0	0	0	1.64e-05	0	0	0	0	0	0	0.000101595	0	0	0	0	0.00660733	0.000981772	0.000274303	0	0	0	0	0	0	0	0	0	0	0	0	0	0	0	0	0	0	0	0	0	0	0	0	0
ZOTU11675	0	8.37e-05	0	0	0	4.18e-05	0.000131073	0.000396997	0.000913051	0	0	0	0	0	0	0	0	1.72e-05	2.2e-05	0	0	0	0	0	0	0	0	0	0	0.000144378	0.000116645	0.000303838	0	0	0	0.000197429	0	0.000257946	0.00128907	0.0014185	0.00104312	0.00125529	0.00163766	0.000832136	0.00123624	0.000595678	0.00308945	0.000532188	0.000258413
ZOTU1603	0	0	0	0	1.59e-05	0.000320334	8.74e-05	0.00157073	0.00167393	0	0	0	0	0	0	0	0	0	0	0	0	0	0	0	0	0	0	1.91e-05	5.05e-05	0.000162426	0.00118978	0.00219439	0	0	6.34e-05	0.000809461	0	0	0	0	0	0	0	0	0	0	0	0	0
ZOTU3675	0	0	0	0	0.000621613	0.000682451	0.000415065	0	5.71e-05	0	0	0	0	0	0	0	1.69e-05	0.00020615	2.2e-05	0	0	0	0	0	0	0	0	0.000706835	0.000487936	0.000703844	0.000629885	3.38e-05	0.000316775	0.00105429	0.00190263	0.000157944	0	0.000110548	0	0	0	0	0	0	0	2.38e-05	0	0	0
ZOTU11930	0	0	0	0	0.000860695	9.75e-05	0	0	0	0	0	0	0	0	0	0	1.69e-05	5.15e-05	0	0	0	1.69e-05	1.64e-05	0	0	0	0	0.00271272	0.00174984	0.0012994	4.67e-05	0	0.000930527	0.00010758	0.000232543	0	0	0	0	0	0	0	0	0	0	0	0	0	0
ZOTU3789	0	0	0	0	0	0	0	0	0	0	0	0	0	0	0	0	0	0	0	0	0	0.000134844	0.00665969	0.000402311	0.000940355	0	0	0	0	0	0	0	0	0	0	0	0	0	0	0	0	0	0	0	0	0	0	0	0
ZOTU12361	0	0	0	0	0	0	0	1.73e-05	0.000171197	0	0	0	0	0	0	0	0	0	0	0	0	0	0	0	0	0	0	0	0	0	0	3.38e-05	0	0	0	9.87e-05	0	0	0.000897749	0.00048761	0.000838583	0.00232323	0.00104734	9.08e-05	0.000243767	0.000595678	0.00044135	1.84e-05	0.00067585
ZOTU12341	2.66e-05	0.00023013	0	0	0.000701307	0.00051532	0	3.45e-05	0.000133153	0	0	0	0	0	0	0	3.39e-05	0.000481017	4.4e-05	0	0	0	0	0	0	0	0	0.00307569	0.00111048	0.000884317	7e-05	0.000135039	0.000475163	0	8.46e-05	7.9e-05	0	0	0	0	0	0	0	0	0	0	0	0	0
ZOTU1243	0.000239738	0.000418419	0	0	0.000637552	0.000640669	0.000830129	0.000138086	9.51e-05	0.000196812	0.000181709	0	0	0	0	0	0.000220123	0.000343584	0	0	0	0.000117988	9.82e-05	0	0	0.000821102	0	1.91e-05	0.000117778	1.8e-05	0.000139974	0.000168799	0.000356372	0.000344256	0.000126842	0.000750232	0	0.000792262	9.21e-05	4.43e-05	2.05e-05	7.49e-05	0	3.03e-05	3.48e-05	0	0	0	0
ZOTU6571	0	0	0	0	0	0.000139276	6.55e-05	0.000345214	0.000932073	0	0	0	0	0	0	0	0	0	0	0	0	0	0	0	0	0	0	0	0	0.000342898	0.000116645	0.000236319	0	0	0	0.000177687	0	0.000294795	0.00027623	0.000243805	0.000429518	0.000168621	0.000342766	0.000302595	0.000191531	0.000476542	0.000980777	0.00124789	5.96e-05
ZOTU13337	0	0	0	0	0	0	0	0	0	0	0	0	0	0	0	0	0	0	0	0	0	0	0	0	0	0	0	0	0	0	0	0	0	0	0	0	0	0	0	0	0	0	0	0	0	0.00204913	0.00867987	1.84e-05	5.96e-05
ZOTU2704	0	0	0	0	0	0	0	6.9e-05	0.000247285	0	0	0	0	0	0	0	0	0	0	0	0	0	0	0	0	0	0	0	0	0	0	0.000270079	0	0	0	5.92e-05	0	0	0.000368307	0.000221641	0.000224986	0.000243564	0.00316106	0.000529541	0	0	0	0.00266094	0
ZOTU12250	0	0	0	0	0	5.57e-05	0	0.00046604	0.000779898	0	0	0	0	0	0	0	0	0	0	0	0	0	0	0	0	0	0	0	0	9.02e-05	0.000116645	0.000303838	0	0	0	0.000296144	0	0	0.000598499	0.000842236	0.000490878	0.000449657	0.000304681	0.000363114	0	0.000452715	0.00860632	0.00027527	0
ZOTU864	0	0	0	0	0	0	0	0	0	0	0	0	0	0	0	0	0	0	0	0	0	0	0	0	0	0	0	0	0	0	0	0	0	0	0	0	0	0	0	0	0	0	0	0	0	0	0.008214	0	0
ZOTU12117	0	0	0	0	0	0	0.000393219	0.000189868	0.000323372	0	0	0	0	0	0	0	1.69e-05	3.44e-05	8.79e-05	0.000454513	0	0	0	0	0	0	0	0	0	5.41e-05	0	0.000236319	0	0	0	5.92e-05	0	0	0.000644538	0.000177313	0.0015749	0.00103046	0.0011616	6.05e-05	0.000330826	0.00111987	0	7.34e-05	0
ZOTU5289	0	0	0	0	0.000733185	0.000696379	0.00087382	0.00070769	0.000152175	1.64e-05	0	0	0	0	0	0	0	0.000137433	0.000109895	0	0	0	0	0	0	0	0	0.000267451	0.000790793	0.000776033	0.00125977	0.000607677	0.000197985	0	0.000317105	0.000217172	0	1.84e-05	4.6e-05	2.22e-05	0	0	3.81e-05	0	0	2.38e-05	0	0	0
ZOTU8688	0	0	0	0	0	0	0	0	0	0	0	0	0	0	0	0	0	0	0	0	0	0	0	0	0	0	0	0	0	0	0	0	0	0	0	0	0	0	0	0	0	1.87e-05	5.71e-05	0	0.00092283	0.00119136	0	0.00027527	0.00552607
ZOTU9729	0	0	0	0	0	0	0	3.45e-05	9.51e-05	0	0	0	0	0	0	0	0	0	0	0	0	0	0	0	0	0	0	0	0	0	0	6.75e-05	0	0	0	1.97e-05	0	0	0.000483403	0.0008644	0	0	0	0.00898706	0.0007313	0.000119136	0	0.00277105	0.000616216
ZOTU11728	0	0	0	0	0	0.00086351	0.000393219	0.000742211	0.000646744	0	0	0	0	0	0	0	0	6.87e-05	8.79e-05	0	0	0	0	0	0	0	0	1.91e-05	0	0.000252662	0.000839846	0.000607677	0	0	2.11e-05	0.000769975	0.000538329	0.000700138	0.00128907	0.00250454	0.00069541	0.000505864	0.000704574	0.000938044	0	0.00111987	0	0.000128459	3.98e-05
ZOTU1968	0	0	0.0064423	0.000896554	0	0	0	0	0	0.000114807	0	0	0	0	0	0	0	0	2.2e-05	0	0.000511537	0	0	0	0	0	0	0	0	0	0	0	0	0	0	0	0	0	0	0	0	0	0	0	0	0	0	0	0
ZOTU3394	0	0	0	0	0	0	0	0.000189868	0.000285328	0	0	0	0	0	0	0	0	0	0	0	0	0	0	0	0	0	0	0	0	0.000108284	7e-05	3.38e-05	0	0	0	5.92e-05	0	3.68e-05	0.000184154	0.00048761	0.000572691	0.00125529	0.00118064	0.00108934	0.000905419	0.00033358	0.000735583	0.00178008	0.00133182
ZOTU6015	2.66e-05	6.28e-05	0	0	0.000717246	0.000738162	0.000131073	1.73e-05	7.61e-05	1.64e-05	0	0	0	0	0	0	0	0.000223329	0	0	0	0	0	0	0	0	0	0.00118443	0.00200222	0.00126331	7e-05	0.000101279	0.000712744	0.00021516	4.23e-05	7.9e-05	0	0.000128973	0.000115096	4.43e-05	0	0	0	0	0	0	0	0	0
ZOTU8944	2.66e-05	0	0	0	0.00100414	4.18e-05	0	0	0	0	0	0	0	0	0	0	0	3.44e-05	0	0	0	1.69e-05	6.55e-05	0	0	0	0	0.00334314	0.000471111	0.00066775	0	3.38e-05	0.00213823	0	0.000105702	0	0	0	0	0	0	0	0	0	0	0	0	0	0
ZOTU972	0	0	0	0	4.78e-05	0.000961003	0.000742747	0.00112195	0.000551635	0	0	0	0	0	0	0	0	5.15e-05	0	0	0	0	0	0	0	0	0	0.000133726	0.000572063	0.00108284	0.00293946	0.00155295	3.96e-05	2.15e-05	0.000380526	0.00195455	0.00170112	0.000534316	0	0	0	0	0	0	0	0	0	0	0
ZOTU3200	1.33e-05	0	0	0	0	2.79e-05	0	6.9e-05	0.000152175	0	0	0	0	0	0	0	0	0	0	0	0	0	0	0	0	0	0	0	0	7.22e-05	0.000233291	3.38e-05	0	0	2.11e-05	5.92e-05	0.000107666	0.000221096	6.91e-05	0.000132985	0.000490878	0.000374714	7.62e-05	0.000363114	0.00283814	0.00102457	0	0.000752404	0.000854752
ZOTU7779	4e-05	0	0	0	1.59e-05	0.000153203	0	0.000120825	0.000152175	0	0	0	0	0	0	0	1.69e-05	0.000824601	4.4e-05	0	0	0	0	0	0	0	0	9.55e-05	0.000639365	0.000252662	0.000396594	0.000607677	9.9e-05	0.00152764	0.00169122	0.00108586	0.000172265	0	0	0	0	0	0	0	0	0	0	0	0
ZOTU1119	5.33e-05	2.09e-05	0	0	0	0	0	0	0	0.00050843	6.99e-05	0	0	0	0	0	0.00597718	0.00128844	0	0	0	0	0	0	0	0	0	0	0	0	0	0	0	0	0	0	0	0	0	0	0	0	0	0	0	0	0	0	0
ZOTU1087	0	0	0	0	0	0	0	0	1.9e-05	0	0	0	0	0	0	0	0	0	0	0	0	0	0	0	0	0	0	0	0	0	0	3.38e-05	0	0	0	3.95e-05	0	0	4.6e-05	4.43e-05	0.000184079	0.000168621	7.62e-05	0.000196687	0.000104471	0.000190617	0.0114506	5.51e-05	0
ZOTU4802	0	0	0	0	0.000255021	0.00045961	0.00371374	0.00117373	7.61e-05	0	0	0	0	0	0	0	0	0	0	0	0	0	0	0	0	0	0	3.82e-05	0.000336508	0.000415088	0.0027295	0.00101279	0	0.00101125	0.00065535	0.000394859	0.00127046	0.000552741	0	0	0	0	0	0	0	0	0	1.84e-05	0
ZOTU4937	0	0	0	0	0.00079694	0.000389972	0	0	1.9e-05	0	0	0	0	0	0	0	1.69e-05	8.59e-05	0	0	0	0	3.27e-05	0	0	0	0	0.00206319	0.00228825	0.00117307	0.000303278	0.000135039	0.000534558	0	4.23e-05	1.97e-05	0	0	0	0	0	0	0	0	0	0	0	0	0
ZOTU7856	0	0	0	0	0.000223143	0.000417827	0.00122335	0.000759472	0.000209241	0	0	0	0	0	0	0	0	0	0	0	0	0	0	0	0	0	0	9.55e-05	0.000269206	0.000559466	0.00158638	0.000911515	3.96e-05	0	6.34e-05	0.000493574	0.00047373	0.000571165	0	0	0	0	0	0	0	0	0	0	0
ZOTU1602	0	0	0	0	0.00275741	0.000208914	0	0	0	0	0	0	0	0	0	0	1.69e-05	0	0	0	0	0	1.64e-05	0	0	0	0	0.00250258	0.000538412	0.000559466	0	0	0.0012869	0	0	0	0	0	0	0	0	0	0	0	0	0	0	0	0
ZOTU10620	0	0	0	0	0.000828817	0.000487465	0.00043691	0.000293432	0.000228263	0	0	0	0	0	0	0	0.00054184	1.72e-05	0	0	0	0.000117988	0	0	0	0	0	0.000191037	0.000538412	0.000324851	0.000443252	0.000303838	0.000554357	0.000451836	0.000507367	0.000394859	0.000645995	0	9.21e-05	6.65e-05	0.000388612	0	0	0	0	0	0	1.84e-05	0
ZOTU3168	0	0	0	0	0	0.000306407	0.000283992	0.00100112	0.00262502	0	0	0	0	0	0	0	0	0	0	0	0	0	0	0	0	0	0	0	1.68e-05	0.000342898	0.00107314	0.00111407	0	0	6.34e-05	0.000947661	0.000301464	0.00165822	0.000621518	0.000465446	6.14e-05	0	0.000285638	0.00269309	1.74e-05	0	0	5.51e-05	0.000178902
ZOTU12705	0.000226419	2.09e-05	0	0	0.0018489	0.000334262	2.18e-05	1.73e-05	0	0	0	0	0	0	0	0	0.00126994	0.000171792	0	0	0	0	1.64e-05	0	0	0	0	0.000343866	0.0011273	0.000523371	0.000233291	0	0.000950326	0.000451836	0.000295964	0	0	0	0	0	0	0	0	0	0	0	0	0	0
ZOTU7290	0	0	0	0	0	0	0	0.000138086	0.000646744	0	0	0	0	0	0	0	0	0	0	0	0	0	0	0	0	0	0	0	0	0	2.33e-05	0.000202559	0	0	0	1.97e-05	0	0	0.000414346	0.00101955	0.00130901	0.00116161	0.000514149	0.000469022	3.48e-05	0.000214444	0	0.00106438	0.000616216
ZOTU946	0	0	0	0	0	0	0	0.000224389	0.000855985	0	0	0	0	0	0	0	0	0	4.4e-05	0	0	0	0	0	0	0	0	0	0	7.22e-05	2.33e-05	0.000135039	1.98e-05	0	0	0.000454088	0	0	0.00202569	0.00221641	0.00147263	0.00166748	0.000837872	0.00234511	0.000330826	0	0	0.00097262	0
ZOTU4923	0	0.000146447	0	0	0	0	2.18e-05	0.000276172	0.000475547	0	0	0	0	0	0	0	0	0	0	0	0	0	0	0	0	0	0	0	0	0.000162426	4.67e-05	3.38e-05	0	0	0	9.87e-05	0	1.84e-05	0.00057548	0.000642759	0.000961302	0.00196725	0.00198042	0.00189122	6.96e-05	0.000214444	0.000343272	0.00152316	0
ZOTU4106	0	0	0	0	0.000143449	0.00118384	0.00207532	0.00141538	0.000475547	0	0	0	0	0	0	0	0	3.44e-05	0	0	0	0	0	0	0	0	0	5.73e-05	0.000302857	0.000613608	0.00319608	0.00158671	0	0.000129096	0.000274824	0.000651517	0.000452196	0.000571165	0	0	0	0	3.81e-05	0	0	0	0	0	0
ZOTU5995	0.000133188	4.18e-05	0	0	0.000637552	0.000292479	0.000349528	0.000172607	3.8e-05	0	0	0	0	0	0	0	0	5.15e-05	2.2e-05	0	0	1.69e-05	0	0	0	0	0	0.00021014	0.000622539	0.000306804	0.000419923	0.000337598	0.000197985	0.00150612	0.000380526	5.92e-05	0.00133506	0.000700138	0	0	0	0	0	0	0	0	0	0	0
ZOTU4865	0	0	0	0	0	0.000139276	0.000131073	0.000379736	0.000513591	0	0	0	0	0	0	0	0	6.87e-05	0	0	0	0	0	0	0	0	0	1.91e-05	5.05e-05	0.00019852	0.000559897	0.000843996	0	2.15e-05	8.46e-05	0.00033563	0.00047373	0.000608015	0.000115096	0.000110821	0.000102266	0.000243564	0.00022851	0.000226946	0.000313414	0.000857776	0.00267262	0.000660647	0.000298169
ZOTU4685	1.33e-05	2.09e-05	0	0	0.002343	0.000543175	0	1.73e-05	5.71e-05	3.28e-05	0	0	0	0	0	0	0	0.000188971	0	0	0	0	0	0	0	0	0	0.00189126	0.000538412	0.000487277	0	0	0.000989923	0.00032274	0.000317105	1.97e-05	0	0	0	4.43e-05	0	0	0	0	0	0	0	0	0
ZOTU6957	0	2.09e-05	0	0	6.38e-05	0.000208914	2.18e-05	0.000207129	5.71e-05	0	0	0	0	0	0	0	0	8.59e-05	4.4e-05	0	0	0	0	0	0	0	0	7.64e-05	1.68e-05	0.00039704	0.00611221	0.000236319	0	0	0	0.000217172	0	0	0	0	0	0	0	0	0	0	0	0	0
ZOTU1949	0	0.000104605	0	0	0.00102008	0.00122563	0.000764593	0.0004833	0.000437504	0	0	0	0	0	0	0	0	0.000188971	0.000153853	0	0	0	0	0	0	0	0	9.55e-05	0.000504762	0.00059556	0.000583226	0.000270079	0	0.00021516	8.46e-05	0.000296144	0	0.00058959	4.6e-05	8.87e-05	0	0	0	0	0	0	0	0	0
ZOTU3184	0	6.28e-05	0	0	0	5.57e-05	0.000393219	0.000500561	0.000817941	0	0	0	0	0	0	0	0	3.44e-05	0.000307706	0	0	0	0	0	0	0	0	1.91e-05	0	0.000288757	0.000513239	0.000776476	0	0	4.23e-05	0.000947661	0.00047373	0.00086596	0.000184154	0.000155149	0.000613597	0.000936786	0.000590319	0.000938044	0.00228096	0	0	0.000825809	0.000357803
ZOTU5095	0	4.18e-05	0	0	0	0.000222841	0.000174764	0.000396997	0.000380438	0	0	0	0	0	0	0	0	0	0	0	0	8.43e-05	1.64e-05	0	0	0	0	0	5.05e-05	5.41e-05	0.00048991	0.000843996	1.98e-05	0.000129096	0.000232543	0.000789718	0.00189492	0.00165822	0.000184154	6.65e-05	0	0	0	0	0	0	0	0	0
ZOTU8648	0	0	0	0	0	0	0	0	0	0	0	0	0	0	0	0	0	0	0	0	0	0	0	0	0	0	0	0	0	0	0	0	0.00174226	0.00176431	0.00420692	0	0	0	0	0	0	0	0	0	0	0	0	0	0
ZOTU11052	0	0	0	0	0.000191266	0.00107242	0.000152919	0.000362475	0.000475547	0	0	0	0	0	0	0	0	1.72e-05	0	0	0	0	0	0	0	0	0	9.55e-05	0.000134603	0.00039704	0.000886504	0.00131663	5.94e-05	0.000258192	0.000169122	0.000236915	6.46e-05	0.00123445	0	0	0	0	0	0	0	0	0	0.000587242	0
ZOTU9187	0	0	0	0	0	9.75e-05	2.18e-05	0.000120825	0.000228263	0	0	0	0	0	0	0	0	0	0	0	0	0	0	0	0	0	0	0	1.68e-05	9.02e-05	4.67e-05	6.75e-05	0	0	0	3.95e-05	0.000258398	0.0014924	9.21e-05	6.65e-05	0.000184079	0	0.000476064	0.00440275	0	0	0	0	0
ZOTU2990	0	0	0	0	4.78e-05	0.000250696	0.00019661	0.000276172	0.000323372	0	0	0	0	0	0	0	0	3.44e-05	4.4e-05	0	0	0	0	0	0	0	0	0.00021014	0.000403809	0.000216567	0.000583226	0.000405118	7.92e-05	0.000172128	0.0010993	0.000888433	0.00213178	0.000331644	0	0	0	0	0	0	0	0	0	0	0
ZOTU6987	2.66e-05	0	0	0	0.00215174	0.000598886	0	3.45e-05	0	0	0	0	0	0	0	0	6.77e-05	0.000120254	0	0	0	0	0	0	0	0	0	0.0015665	0.000841269	0.000703844	0	0	0.00144529	0	0.000126842	0	0	0	0	0	0	0	0	0	0	0	0	0	0
ZOTU2894	0	0.000271972	0.00360876	0.000619437	0	0	0	0	0	0	0	0	0	0	0	0	0	0	0	0	0	0.00241033	0.000621789	0.000146295	0	0	0	0	0	0	0	0	0	0	0	0	0	0	0	0	0	0	0	0	0	0	0	0	0
ZOTU5007	2.66e-05	4.18e-05	0	0	0	0.000194986	0.000109228	0.000776733	0.000418482	0	0	0	0	0	0	0	1.69e-05	5.15e-05	0.000263748	0	0	0	0	0	0	0	0	7.64e-05	0.000723492	0.00066775	0.00118978	0.000877756	0.000237581	0.000301224	0.000761051	0.00086869	0	0	4.6e-05	0	0	0	0	0	0	0	0	0	0
ZOTU1065	0	0	0	0	0	0	0	0	0	0	0	0	0	0	0	0	0	0	0	0	0	0	0	0	0	0	0	0	0	0	0	0	0	0	0	0	0	0	9.21e-05	0	0	0	0	0	0	0.00135815	2.45e-05	0	0
ZOTU1531	0	4.18e-05	0	0	1.59e-05	1.39e-05	2.18e-05	0.000914818	0.000932073	0	0	0	0	0	0	0	0	0	0	0	0	0	0	0	0	0	0	0	0	5.41e-05	0.000373265	0.000742716	0	0	0.000126842	0.00128329	0.000667528	0.00226624	9.21e-05	2.22e-05	6.14e-05	0	0	0	0	0	0	0	0
ZOTU5245	0	0	0	0	0	0	4.37e-05	0	0	0	5.59e-05	0	0	0	0	0	0	0	2.2e-05	0	0.000292307	0	0	0.000182869	0	0	0	1.91e-05	0	0	0	0	1.98e-05	0.000580933	0.000126842	7.9e-05	0.00170112	0.000294795	0	0	0	1.87e-05	1.9e-05	0.000105908	0.000208943	0.000190617	0	0.000110108	0.00242511
ZOTU4369	0	0	0	0	0	0	0	1.73e-05	0	0	0	0	0	0	0	0	0	0	0	0	0	0	0	0	0	0	0	0	0	0	0	0	0	0	0	0	0	0	0	2.22e-05	0.00114538	0.0015738	0.00198042	0	0.000383062	0	0	0.00284445	0.00445266
ZOTU3142	0	0.0016946	0	0	0	0	0	0.000120825	0.00030435	0	0	0	0	0	0	0	0	0	0	0	0.00102307	0	0	0	0	0	0	0	0	0	0	0.000236319	0	0	0	0.000473831	0	0	0.00029925	0.000930892	0.00194306	0.00185484	0.002685	0.000514411	0	0	0	0.000623945	0
ZOTU3660	0	0	0	0	0	1.39e-05	0	0.000276172	0.00119838	0	0	0	0	0	0	0	0	0	4.4e-05	0	0	0	0	0	0	0	0	0	1.68e-05	0.000252662	0.000233291	0.000573917	0	0	4.23e-05	0.000217172	8.61e-05	0.000257946	0.000713595	0.000554103	0.000674957	0.000112414	0.000361808	0.000938044	0	0	0	0.000990971	0
ZOTU3573	0	0	0	0	0	0	0	0.000103564	0.000342394	0	0	0	0	0	0	0	0	0	0	0	0	0	0	0	0	0	0	0	0	9.02e-05	0	0.000101279	0	0	0	0	0	0.000128973	0.000253211	0.000243805	0.000511331	0.000112414	0.000418936	0.000620319	0.000696476	0.000142963	0.00421734	0.00027527	0.00067585
ZOTU12869	0	0	0	0	0.000223143	0.000139276	0	0	0	0	0	0	0	0	0	0	0	0	0	0	0	0	0	0	0	0	0	0.00527261	0.000302857	0.00019852	0	0	0.00136609	0	0	0	0	0	0	0	0	0	0	0	0	0	0	0	0
ZOTU4706	4e-05	0	0	0	0.00219955	0.00167131	0.00249039	0.000172607	0	3.28e-05	0.000125798	0	0	0	0	0	1.69e-05	0.000274867	8.79e-05	0	0	0	1.64e-05	0	0	0	0	5.73e-05	1.68e-05	1.8e-05	4.67e-05	0.000101279	1.98e-05	0	2.11e-05	0	0	0	0	0	2.05e-05	5.62e-05	0	0	0	0	0	0	0
ZOTU13841	0	0	0	0	0	2.79e-05	0.000174764	0.000258911	0.000323372	0	0	0	0	0	0	0	0	1.72e-05	2.2e-05	0	0	0	0	0	0	0	0	0	1.68e-05	1.8e-05	7e-05	0.000506397	0	0	0	0.000138201	0.000581395	0.000350069	0.00085171	0.000953056	0.000736317	0.00103046	0.000495106	0.000726227	1.74e-05	0	0	0.000165162	0
ZOTU10604	0	0	0	0	4.78e-05	2.79e-05	0.000327683	0.00107017	0.000741854	0	0	0	0	0	0	0	0	0	4.4e-05	0	0	0	0	0	0	0	0	0	0	0.000144378	0.000419923	0.000742716	1.98e-05	0	2.11e-05	0.00102663	0.00124892	0.000847536	0.000414346	0.000199477	2.05e-05	3.75e-05	0	7.56e-05	0	0	0	0	0
ZOTU1320	0.00257052	0.000732233	0	0	0	0	0	0	0	6.56e-05	0	0	0.00406312	0	0	0	0	0	0	0	0	0	1.64e-05	0	0	0	0	0	0	0	0	0	0	0	0	0	0	0	0	0	0	0	0	0	0	0	0	0	0
ZOTU1848	4e-05	2.09e-05	0	0	9.56e-05	0.000389972	0.000131073	6.9e-05	0	1.64e-05	0	0	0	0	0	0	0	0.000292046	0	0	0	0	0	0	0	0	0	0.000171933	0.000487936	0.000288757	0.000279949	0.000101279	0.000613752	0.000258192	0.00295964	0.000473831	0.000495263	0.000257946	0	0	0	0	0	0	0	0	0	0	0
ZOTU4946	0	0	0	0	0	6.96e-05	2.18e-05	0.000103564	0.000266307	0	0	0	0	0	0	0	0	0	0	0	0	0	0	0	0	0	0	3.82e-05	0	0	9.33e-05	0.000337598	0	0	0	0.000177687	0	0	0.000161134	2.22e-05	2.05e-05	0.0002623	0.000380851	0.0014222	0.0033605	0.00016679	0.00259906	0.0013213	0.000377681
ZOTU1725	2.66e-05	0.000418419	0	0	0	0	0	0	0	0	0	0	0	0	0	0	0	0	0.00602224	0.000624956	0	0	0	0	0	0	0	0	0	0	0	0	0	0	0	0	0	0	0	0	0	0	0	0	0.000313414	0	0	0	0
ZOTU3923	0	2.09e-05	0	0	0	0	2.18e-05	0.000103564	0.000285328	0	0	0	0	0	0	0	0	0	0	0	0	0	0	0	0	0	0	0	0	9.02e-05	2.33e-05	0.000101279	0	0	0	0.000236915	0	0	0.00027623	0.000443282	0.000838583	0.00123656	0.00133298	0.000196687	0.000174119	0.00109605	0.00041683	0.000330324	7.95e-05
ZOTU3111	0	0.000125526	0.000588094	0	0	0	0	0	0	0.00067244	0.0029353	0.0030079	0	0	0	0	0	0	6.59e-05	0	0	0	0	0	0	0	0	0	0	0	0	0	0	0	0	0	0	0	0	0	0	0	0	0	0	0	0	0	0
ZOTU6298	4e-05	0.000188288	0	0	6.38e-05	0.000153203	0.000174764	0.000258911	0.000171197	1.64e-05	0	0	0	0	0	0	0.000101595	0.000584092	0	0	0	1.69e-05	0	0	0	0	0	0.00021014	0.000185079	0.000360946	0.000653214	0.000979035	0.000217783	0.000796093	0.000295964	0.00053306	0	0.00101336	0.000184154	0.000110821	4.09e-05	0	0	4.54e-05	0	0	0	0	0
ZOTU2946	7.99e-05	6.28e-05	0	0	0.000765062	0.000654596	0.000371374	1.73e-05	0.000190219	0.000131208	0	0	0	0	0	0	8.47e-05	0.000515375	0.000175832	0	0	0	0	0	0	0	0	0.000401177	0.000723492	0.000577513	0.000653214	0.000303838	0.000118791	0	0.00071877	0.000414602	0	0.00027637	2.3e-05	2.22e-05	0.000102266	0	0	0	0	0	0	0	0
ZOTU4891	0	0	0	0	3.19e-05	0.000111421	8.74e-05	0.000120825	0.000247285	0	0	0	0	0	0	0	0	0	0	0	0	0	0	0	0	0	0	0	1.68e-05	0.000162426	7e-05	0.000101279	0	0	0	0.000315887	0.000430663	0	0.000368307	0.000221641	2.05e-05	0.000711957	0.000190425	0.00105908	0.000992478	0.00190617	0	0.000330324	0.000178902
ZOTU12317	0	0	0	0	0	2.79e-05	4.37e-05	0.000345214	0.000741854	0	0	0	0	0	0	0	0	0	2.2e-05	0	0	1.69e-05	0	0	0	0	0	0	0	0.000126331	0.000163303	0.000472638	0	0	0	0.000513317	0.000430663	0.000442193	0.000966806	0.00308081	0.000859036	0.0005246	0.000666489	0.000877525	0.000226355	0.000214444	0.000122597	0.000532188	0.000218657
ZOTU10142	0	0.00198749	8.02e-05	0	0	0	0	0	0	0	0	0	0	0	0	0	0	0	0	0	0.00102307	0.00407902	0.000196354	0	0	0	0	0	0	0	0	0	0	0	0	0	0	0	0	0	0	0	0	0	0	0	0	0	0
ZOTU6365	0	0	0	0	0	0	0	0	0	0	0	0	0	0	0	0	0	0	0	0	0	0	0	0	0	0	0	0	0	0	0	0	0.00296977	0.00288315	0.00145868	0	0	0	4.6e-05	0	0	0	0	0	0	0	0	0	0
ZOTU5569	4e-05	6.28e-05	0	0	0.000334715	0.000278552	0.000720902	0.000327954	9.51e-05	0	0	0	0	0	0	0	0	6.87e-05	0.000131874	0	0	0	0	0	0	0	0.000443692	0.000133726	0.000319682	0.000360946	0.00097982	0.000573917	9.9e-05	0.000666997	0.000253684	0.000118458	0.000452196	0.000829111	0	2.22e-05	2.05e-05	0	1.9e-05	0	0	0	0	0	0
ZOTU1362	0	2.09e-05	0	0	0	0	0	0	0	0	0	0	0	0	0	0	0	0	2.2e-05	2.84e-05	0.00725286	0	0	0	0	0	0	0	0	0	0	0	0	0	0	0	0	0	0	0	0	0	0	0	0	0	0	0	0
ZOTU938	0.00707227	8.37e-05	0	0	0	0	0	0	0	0	0	0	0	0	0	0	0.00013546	0	0	0	0	1.69e-05	0	0	0	0	0	0	0	0	0	0	0	0	0	0	0	0	0	0	0	0	0	0	0	0	0	0	0
ZOTU10801	0	0	0	0	6.38e-05	0.000598886	0.00043691	0.000586865	0.000817941	0	0	0	0	0	0	0	0	0	0	0	0	0	0	0	0	0	0	0	1.68e-05	0.000360946	0.000886504	0.000506397	0	0	2.11e-05	0.000296144	0	0.000644864	0.000345288	0.000554103	0.000654504	0.000637014	0.000247553	0.00124064	0.00109695	0.000285925	0	0.000587242	0
ZOTU9453	0.00010655	4.18e-05	0	0	0.000318776	0.000389972	8.74e-05	0.000362475	0	0.000475628	0.000167731	0	0	0	0	0	0.000237055	0.000223329	0	0	0	0	0	0	0	0	0	0.000305659	0.000302857	0.000433135	0.000116645	0.000202559	0.000950326	0.00111883	0.00112044	0.000296144	0	0	0	2.22e-05	0	0	0	0	0	0	0	0	0
ZOTU1450	0	0	0	0	6.38e-05	1.39e-05	0	0	5.71e-05	6.56e-05	0	0	0	0	0	0	5.08e-05	0.000120254	0	0	0	0	0	0	0	0	0	0.000133726	0.000100952	0.000126331	9.33e-05	3.38e-05	0.00156408	0.000494868	0.00198719	0.000197429	0.00174419	0.000423768	0	0	0	0	0	0	0	0	0	0	0
ZOTU10348	9.32e-05	0.000878679	0	0	0.000207204	0.000348189	0.000830129	0.000379736	0.000171197	3.28e-05	0	0	0	0	0	0	3.39e-05	0.000257688	0.000197811	0	0	0	0	0	0	0	0	0.000133726	0.000252381	0.000126331	0.000466581	0.000337598	9.9e-05	0.000344256	0.000591929	0.000809461	0.000301464	0.00031322	2.3e-05	2.22e-05	0	1.87e-05	0	0	0	0	0	0	0
ZOTU12813	0	6.28e-05	0	0	0	9.75e-05	0.000109228	0.000172607	0.000551635	0	0	0	0	0	0	0	0	0	4.4e-05	0	0	0	0	0	0	0	0	0	0	0.000162426	0	0.000168799	0	0	0	0.000394859	0	0	0.000667557	0.00175096	0.000981756	0.000992993	0.000799787	0.000741357	0.00113177	0.000524196	0	0.0021471	0
ZOTU2829	0	8.37e-05	0	0	0	1.39e-05	0	6.9e-05	0.000152175	0	0	0	0	0	0	0	0	0	0	0	0	0	0	0	0	0	0	0	0	0	2.33e-05	0	0	0	4.23e-05	1.97e-05	0	0	0.000391326	0.000310297	0.000286345	0.000299771	0.00146628	7.56e-05	0.000261178	2.38e-05	0	0.00122954	0.00244499
ZOTU1604	0	0	0	0	0	0	0	0	1.9e-05	0	0	0	0	0	0	0	0	0	0	0	0	0	0	0	0	0	0	0	0	0	0	0	0	0	0	0	0	0	0	0	0	0	0	0	0	0.000833949	0.00767458	0	0
ZOTU3780	1.33e-05	8.37e-05	0	0	4.78e-05	0.00101671	0.00126704	0.00072495	0.000361416	1.64e-05	0	0	0	0	0	0	0	8.59e-05	0.000109895	0	0	0	0	0	0	0	0	0	1.68e-05	7.22e-05	0.000816517	0.00141791	0	0	0.000232543	0.000414602	0.00040913	7.37e-05	0	0	0	0	0	0	0	0	0	0	0
ZOTU6876	0	0	0	0	0	2.79e-05	6.55e-05	0.000224389	0.000779898	0	0	0	0	0	0	0	0	0	0	0	0	0.000101133	1.64e-05	0	0	0	0	0	0	1.8e-05	0	0.000101279	0	0	0	7.9e-05	0.000322997	0.000921234	0.000828691	0.000221641	0	0	3.81e-05	0	0	0	0	0.0034317	0
ZOTU1561	0.00263712	0.000502103	0	0.000537932	0	1.39e-05	0	0	0	0	0	0	0	0	0	0	0.00225202	0.000360763	0	0	0	0.000623652	0.000130903	0	0	0	0	0	0	1.8e-05	0	0	0	0	8.46e-05	0	0	0	0	0	0	0	0	0	0	0	0	0	0
ZOTU12606	0	2.09e-05	0	0	4.78e-05	0.000194986	0.000458756	0.000345214	0.000380438	1.64e-05	0	0	0	0	0	0	0	0.000171792	0	0	0	0	0	0	0	0	0	5.73e-05	0.000100952	0.000162426	0.000139974	0.000371358	9.9e-05	8.61e-05	0.000359385	0.00067126	0.000624462	0.00254261	0.000253211	2.22e-05	0	0	0	0	0	0	0	0	0
ZOTU3178	0	0	0	0	0	0	0	5.18e-05	0.000228263	0	0	0	0	0	0	0	0	0	0	0	0	0	0	0	0	0	0	0	0	1.8e-05	0	0	0	0	0	1.97e-05	0	0	0.00057548	0.000398954	0.000777223	0.000618279	0.00220893	0.000166427	0.000330826	0.000142963	0.00274618	0.000678999	1.99e-05
ZOTU2213	4e-05	4.18e-05	0	0	0.00272553	0.000779944	2.18e-05	0	0	4.92e-05	8.39e-05	0	0	0	0	0	0	0.000257688	0	0	0	0	0	0	0	0	0	0.000745043	0.000706666	0.000631655	0.000116645	6.75e-05	0.00025738	0.00010758	0.000359385	0.000118458	0	0	0	0	0	0	0	0	0	0	0	0	0
ZOTU11277	0	0	0	0	0	0	0	0.000310693	0.000494569	0	0	0	0	0	0	0	0	0	0	0	0	0	0	0	0	0	0	0	1.68e-05	0.000144378	4.67e-05	0.000135039	0	0	0	0.00053306	0	0.000147398	0.00110492	0.000731415	0.000449971	0.000149886	0.000323723	0.00108934	0	0	0	0.0014314	0
ZOTU5000	0	0	0	0	0	6.96e-05	6.55e-05	0.00024165	0.000570657	0	0	0	0	0	0	0	0	0	4.4e-05	0	0	0	0	0	0	0	0	0	1.68e-05	0.000162426	0.000209962	0.000371358	0	0	0	0.000355373	0	0.000460617	0.000828691	0.0020391	0.00069541	0.000374714	0.000894999	0.000862395	0.000504945	0.000357407	0	0.000825809	0
ZOTU11642	0	0	0	0	0	0	0	0	0	0	0	0	0	0	0	0	0	0	0	0	0	0	0	0	0	0	0	0	0	0	0	0	0	0	0	0	0	0	0	0	0	0	0	0.000877525	0.000208943	0.000810122	0	0.00267929	0
ZOTU1670	0	0	0	0	0.00039847	0.00086351	0.000808284	0.000224389	0.000247285	0	0	0	0	0	0	0	1.69e-05	1.72e-05	2.2e-05	0	0	0	0	0	0	0	0	0.00042028	0.00121143	0.000830175	0.000396594	6.75e-05	0.000336574	0.000688513	0.000211403	1.97e-05	0.000322997	0	0	0	0	0	0	0	0	0	0	0	0
ZOTU2988	0	0	0	0	0	0	0	0	0	0	0	0	0	0	0	0	0	0	0	0	0	0	0	0	0	0	0	0	0	0	0	0	0	0	0	0	0	0	0	0	0	0	0	0	0	0.00269246	0.00335916	0	9.94e-05
ZOTU6899	0	0.00148539	5.35e-05	0	0	0	0	0	0	0.000131208	0.000251597	0	0	0	0	0	0	0	0	0	0	0.00446669	0.0005727	0.000128008	0	0	0	0	0	0	0	0	0	0	0	0	0	0	0	0	0	0	0	0	0	0	0	0	0
ZOTU1261	0	0	0.000775215	0.00630848	0	0	0	0	0	0	0	0	0	0	0	0	0	0	0	0	0	0	0	0	0	0	0	0	0	0	0	0	0	0	0	0	0	0	0	0	0	0	0	0	0	0	0	0	0
ZOTU5801	5.33e-05	4.18e-05	0	0	0.000286898	0.000139276	0.000240301	3.45e-05	3.8e-05	3.28e-05	0	0	0	0	0	0	5.08e-05	3.44e-05	2.2e-05	0	0	1.69e-05	1.64e-05	0	0	0	0	0.000171933	0.000269206	0.000360946	0.000419923	0.000202559	0.000415767	0.00208705	0.0014164	0.000315887	0	0.000239521	6.91e-05	4.43e-05	2.05e-05	1.87e-05	0	1.51e-05	0	0	0	0	0
ZOTU3973	0	0	0	0	0	0	0	8.63e-05	1.9e-05	0	0	0	0	0	0	0	0	0	0	0	0	0	0	0	0	0	0	0	0	0	0	0	0	0	0	3.95e-05	0	0	0	0	0	0	0	0	0	0.0039553	0	0	0
ZOTU14065	5.33e-05	8.37e-05	0	0	0.000541919	0.000181058	2.18e-05	0	0	4.92e-05	0	0	0	0	0	0	3.39e-05	0.000154613	0	0	0	0	0	0	0	0	0	0.0025981	0.00043746	0.00066775	0	0	0.00209864	0	0.000105702	1.97e-05	0	0	0	0	0	0	0	0	0	0	0	0	0
ZOTU13855	0.0021976	0.000334735	2.67e-05	0.000619437	0	0	0	0	0	0.000131208	0.000237619	0.00226384	0	0	0	0	0.00088049	0.000154613	0	0	0	8.43e-05	9.82e-05	0	0	0	0	0	0	0	0	0	0	0	0	0	0	0	0	0	0	0	0	0	0	0	0	0	0
ZOTU14522	0	0	0	0	0	5.57e-05	0.000131073	0.000276172	0.000475547	0	0	0	0	0	0	0	0	0	2.2e-05	0	0	0	0	0	0	0	0	0	0	0.000144378	0.000279949	0.000472638	0	0	6.34e-05	0.000493574	0	0.000515891	0.000621518	0.0008644	0.000674957	0.000487129	0.000552234	0.000650579	1.74e-05	0	0	0.000220216	0
ZOTU4988	0	0	0	0	0	8.36e-05	0.000109228	0.00046604	0.000456525	0	0	0	0	0	0	0	0	0.00374506	0	0	0	0	0	0	0	0	0	1.91e-05	1.68e-05	0.000144378	0.000279949	0.000675197	0	0	4.23e-05	0.000394859	6.46e-05	0.000442193	0	0	0	5.62e-05	0	0	0	0	0	1.84e-05	0
ZOTU7904	0	0	0	0	0	4.18e-05	6.55e-05	0.000500561	0.000494569	0	0	0	0	0	0	0	0	0	0	0	0	0	0	0	0	0	0	3.82e-05	0.000100952	0.000234615	0.000303278	0.000641437	3.96e-05	0	0.000232543	0.000434345	0.00107666	0.00272685	0	2.22e-05	0	0	0	6.05e-05	0	0	0	0	0
ZOTU6657	0	0	0	0	6.38e-05	0.000905292	0.00194425	0.00103564	0.000551635	0	0	0	0	0	0	0	0	0	0	0	0	0	0	0	0	0	0	0	0.000269206	0.000433135	0.00151639	0.00128287	0	0	8.46e-05	0.000355373	0.00198105	0.000165822	0.000115096	4.43e-05	6.14e-05	0	0	0	0	0	0	0	0
ZOTU1387	0	0	0	0	0	0	0	0	0	0	0	0	0	0	0	0	0	0	0	0	0	0.00092705	0.00512158	0.00082291	0.000134336	0	0	0	0	0	0	0	0	0	0	0	0	0	0	0	0	0	0	0	0	0	0	0	0
ZOTU11850	0.000412882	0.000146447	0	0	0	2.79e-05	0.000262146	1.73e-05	3.8e-05	1.64e-05	0	0	0	0	0	0	0.000321718	0.000429479	0.00213196	0.00244301	0	0.000134844	6.55e-05	0	0	0	0	1.91e-05	0	3.61e-05	0	0	0	0	0	1.97e-05	0.000366064	0	6.91e-05	0	2.05e-05	1.87e-05	0	0	0	0	0	0	0
ZOTU2016	0	2.09e-05	0	0	0	0	0	0	0	0	0	0	0	0	0	0	0	0	0	0.00019885	0.00674133	3.37e-05	0	0	0	0	0	0	0	0	0	0	0	0	0	0	0	0	0	0	0	0	0	0	0	0	0	0	0
ZOTU4637	0	0	0	0	0	0	0	8.63e-05	0.000380438	0	0	0	0	0	0	0	0	0	0	0	0	0	0	0	0	0	0	0	0	1.8e-05	0	0.000101279	0	0	0	5.92e-05	0	0	0.000460384	0.000443282	0.000899943	3.75e-05	0.00270404	0.000695968	0	0	0	0.00108273	0
ZOTU3485	0	4.18e-05	0	0	0.000175327	0.000348189	0.000786438	0.000327954	7.61e-05	1.64e-05	0	0	0	0	0	0	3.39e-05	0.000223329	2.2e-05	0	0	0	0	0	0	0	0	0.000362969	0.000403809	0.000613608	0.00107314	0.000168799	9.9e-05	0.000129096	0.000274824	0.000276401	0.00150732	0	0	0	0	0	0	0	0	0	0	0	0
ZOTU4139	0	0	0	0	0	0	0	0.000379736	0.000894029	0	0	0	0	0	0	0	0	0	0	0	0	0	0	0	0	0	0	0	0	0.000342898	0	6.75e-05	0	0	0	3.95e-05	0	0	0.000621518	0.000886564	0.000409065	0.00112414	0.00186617	0.000196687	0	0	0	0.000128459	0
ZOTU13938	5.33e-05	0	0	0	0.000350653	2.79e-05	0	0	0	4.92e-05	0.000181709	0	0	0	0	0	5.08e-05	0	0	0	0	6.74e-05	3.27e-05	0	0	0	0	0.000936079	8.41e-05	0.000415088	0	0	0.00429626	0	0.000401666	0	0	0	0	0	0	0	0	0	0	0	0	0	0
ZOTU1816	4e-05	0.00633904	2.67e-05	0	0	0	0	0	0	1.64e-05	0	0	0	0	0	0	0	0	0	0	0	0.000387675	0.000130903	0	0	0	0	0	0	0	0	0	0	0	0	0	0	0	0	0	0	0	0	0	0	0	0	0	0
ZOTU12960	0	0	0	0	6.38e-05	0.000306407	0.000851975	0.00094934	0.00039946	0	0	0	0	0	0	0	0	1.72e-05	0	0	0	0	0	0	0	0	0	0	6.73e-05	0.000306804	0.00114312	0.000776476	0	0.00032274	0.000147982	0.000454088	0.000925926	0.000147398	4.6e-05	0	0	0	0	0	0	0	0	0	0
ZOTU6537	0	0	0	0	0	0	0	0	0	0	0	0	0	0	0	0	0	0	0	0	0	0	0	0	0	0	0	0	0	1.8e-05	0	0	0	0	0	0	0	0	0.000322269	2.22e-05	0.000265892	0.00144265	0.0013901	0.000771617	3.48e-05	0	0	0.000605593	5.96e-05
ZOTU4392	0	6.28e-05	0	0	0.00167357	0.000710306	0	1.73e-05	0	1.64e-05	0.000195687	0	0	0	0	0	0.00020319	0.000326404	0	0	0	0	0	0	0	0	0	0.00108891	0.00109365	0.000360946	0	0	0.000554357	4.3e-05	0.000465087	5.92e-05	2.15e-05	0	0	0	0	0	0	0	0	0	0	0	0
ZOTU11541	2.66e-05	8.37e-05	0	0	0.000510041	0.000194986	0	0	0	0	0	0.000949863	0	0	0	0	1.69e-05	0.000154613	0	0	0	1.69e-05	0	0	0	0	0	0.00234975	0.000706666	0.000649702	2.33e-05	0	0.00118791	0	0	0	0	0	0	0	0	0	0	0	0	0	0	0	0
ZOTU1997	1.33e-05	0	0	0	0	0	0	0	0	0	0	0	0	0	0	0	0	0	0	0	0	0.00214064	0.00104722	0.000621754	0.000268673	0.00277122	0	0	0	0	0	0	0	0	0	0	0	0	0	0	0	0	0	0	0	0	0	0	0
ZOTU7362	0.000239738	8.37e-05	0	0	0.000701307	0.000208914	0	0	0	0.000180411	0.000167731	0	0	0	0	0	0.00047411	0.000188971	0	0	0	1.69e-05	0	0	0	0	0	0.00120353	0.000807619	0.00119112	0	0	0.0012869	0	0.000105702	0	0	0	0	0	0	0	0	0	0	0	0	0	0
ZOTU10995	0	0	0	0	4.78e-05	0.000139276	0.000327683	0.00046604	0.000380438	0	0	0	0	0	0	0	0	5.15e-05	2.2e-05	0	0	0	0	0	0	0	0	5.73e-05	0.000235555	0.000144378	0.000559897	0.00135039	1.98e-05	0	6.34e-05	0.000177687	0.00103359	0.00112391	0.000115096	0.000199477	0.000265892	1.87e-05	0	1.51e-05	0	0	0	1.84e-05	0
ZOTU2656	0	4.18e-05	0	0	0	0	0	0	0	0	0	0	0	0	0	0	0	0	0	0	0	0.000151699	6.55e-05	0	0	0	0	0	0	0	0	0	0	0	0	0	0	0	0	0	0	0	0	0	0	0.00123901	0	0	3.98e-05
ZOTU6666	1.33e-05	2.09e-05	0	0	0.000143449	0.000292479	0.000393219	0.00024165	0.000152175	0	0	0	0	0	0	0	0	0.000137433	2.2e-05	0	0	0	0	0	0	0	0	0.000133726	0.000252381	0.000252662	0.000606555	0.000540157	5.94e-05	0.000623965	0.000338245	0.00033563	0.00191645	0.000350069	0	0	0	0	0	0	0	0	0	0	0
ZOTU3418	0	0	0	0	0	0.000389972	0.000699056	0.0010529	0.0018261	0	0	0	0	0	0	0	0	0	0	0	0	0	0	0	0	0	0	5.73e-05	3.37e-05	0.000415088	0.00202963	0.00148543	0	0	2.11e-05	0.000691003	0	0.00058959	0.000736614	0.000664923	0	0	0	0	0	0	0	0	0
ZOTU3553	0	0.000167368	0	0	0.000191266	0.000654596	0.00152919	0.00100112	0.00039946	0	0	0	0	0	0	0	0	6.87e-05	2.2e-05	0	0	0	0	0	0	0	0	0.000152829	0.000353333	0.000757986	0.000653214	0.000540157	1.98e-05	0.00021516	0.000274824	0.000809461	0.00133506	0.000829111	0.000345288	0.000110821	0.000143173	0	0	4.54e-05	6.96e-05	0	0	0	0
ZOTU9039	0	4.18e-05	0	0	0	0.000139276	0.000152919	0.000103564	0.000342394	0	0	0	0	0	0	0	0	5.15e-05	2.2e-05	0	0	0	0	0	0	0	0	0	0	0.000108284	0.00025662	0.000168799	0	0	0.000338245	0.000276401	0.00329457	0.0014924	0	0	0	0	0	0	0	0	0	0	0
ZOTU1982	0	0	0	0	0	0	0	0	0	0	0	0	0	0	0	0	0	0	0	0	0	0	0	0	0	0	0	0	0	1.8e-05	0	0	0	0	0	0	0	0	0.000115096	2.22e-05	0.000163626	0	0	1.51e-05	0	0.00557554	0	1.84e-05	0
ZOTU14170	0	0	0	0	0	0	0	0.000327954	0.000380438	0	0	0	0	0	0	0	0	0	2.2e-05	0	0	0	0	0	0	0	0	0	0	7.22e-05	2.33e-05	6.75e-05	0	0	0	0.000118458	0	0.000165822	0.000690576	0.000221641	0.000920396	0.00134897	0.00217085	0.000529541	6.96e-05	0.000285925	0.000171636	0.000532188	0.000159024
ZOTU6920	0.000852401	0.000774075	0	0	9.56e-05	0.000236769	0.000262146	8.63e-05	0	0.00016401	0.000405351	0	0	0	0	0	0.00179485	0.000944855	8.79e-05	0	0	0	0	0	0	0	0	5.73e-05	0.000336508	0.000108284	0.000163303	0	5.94e-05	0	2.11e-05	9.87e-05	0.000236865	0	0	0	0	0	0	0	0	0	0	0	0
ZOTU11333	0	0	0	0	0	0	0	0	0	0	0	0	0	0	0	0	0	0	0	0	0	0	0	0	0	0	0	0	8.41e-05	0	0	0	0.00344493	0	0.000824472	0	0.00236865	5.53e-05	0	0	0	0	0	0	0	0	0	0	0
ZOTU3630	2.66e-05	8.37e-05	0	0	4.78e-05	0.000682451	0.00107043	0.000621386	7.61e-05	1.64e-05	0	0	0	0	0	0	6.77e-05	0.000549734	0.000109895	0	0	0	0	0	0	0	0	1.91e-05	0.000100952	0.000108284	0.000676543	0.000371358	0	0	0.000105702	0.000197429	0.00103359	0.000644864	0.000115096	4.43e-05	0	0	0	0	0	0	0	0	0
ZOTU5337	0	0	0	0	0	0	0	0	0	0.000328019	0.000615015	0.000189973	0.0055896	0	0	0	0	0	4.4e-05	0	0	0	0	0	0	0	0	0	0	0	0	0	0	0	0	0	0	0	0	0	0	0	0	0	0	0	0	0	0
ZOTU14401	0	0	0	0	0	0	0	3.45e-05	0.000171197	0	0	0	0	0	0	0	0	0	0	0	0	0	0	0	0	0	0	0	0	1.8e-05	0	0.000101279	0	0	0	0.000157944	0	0	0.000644538	0.000642759	0.00081813	0.00091805	0.000875957	0.00128603	0	0	0	0.00108273	0
ZOTU12839	0	0	0	0	0	4.18e-05	0	0.000569604	0.00169295	0	0	0	0	0	0	0	0	0	0	0	0	0	0	0	0	0	0	0	0	0	0.000139974	0.000438878	0	0	0	0.000987147	0	0	0.000115096	0.000310297	0.000163626	0.000580807	0.000495106	1.51e-05	1.74e-05	0	0	0.00117448	0
ZOTU3506	0	0	0	0	0	0	2.18e-05	0.000155347	0.000114131	0	0	0	0	0	0	0	0	0	2.2e-05	0	0	0	0	0	0	0	0	0	0	7.22e-05	0.000233291	0.000168799	0	0	0	0.000572545	0.000129199	0.00058959	0.000138115	8.87e-05	6.14e-05	7.49e-05	0	0	0.00036565	0.00364555	0	3.67e-05	0
ZOTU13741	2.66e-05	2.09e-05	0	0	0	6.96e-05	0.000371374	0.00112195	0.00154077	1.64e-05	0.000139776	0	0	0	0	0	0	5.15e-05	0.00065937	0.000298274	0	0	0	0	0	0	0	0	0	0.00019852	0.000909833	0.00182303	0	0	0	0.00130303	0.000667528	0.000644864	0.000230192	0.000332462	0	0	0	4.54e-05	0	0	0	0	0
ZOTU3943	5.33e-05	4.18e-05	0	0	6.38e-05	0.000181058	0.000262146	0.000293432	0.000285328	3.28e-05	0.000125798	0	0	0	0	0	0	0.000240509	2.2e-05	0	0	0	0	0	0	0	0	0.000324762	0.000269206	0.00019852	0.000326607	0.00111407	5.94e-05	0.000882157	0.000486227	0.00134252	4.31e-05	3.68e-05	0	0	0	0	0	0	0	0	0	0	0
ZOTU4354	0	0	0	0	0	0	0	1.73e-05	0	0	0	0	0	0	0	0	0	0	0	0	0	0	0	0	0	0	0	0	0	0	0	0	0	0	0	1.97e-05	0	0	0.000115096	0.000110821	0.000368158	1.87e-05	0.00112351	4.54e-05	0.000661652	0.00126284	0	0.00042208	0.00272328
ZOTU2225	0	0	0	0	0	0	0	0	0	0	0	0	0	0	0	0	0	0	0	0	0	1.69e-05	0.00135812	0.000402311	0	0.0048924	0	0	0	0	0	0	0	0	0	0	0	0	0	0	0	0	0	0	0	0	0	0	0
ZOTU13064	0	6.28e-05	2.67e-05	0	0	0.000111421	6.55e-05	0.000793993	0.00110327	0	0	0	0	0	0	0	0	0	0	0	0	0	0	0	0	0	0	0	0	0.000126331	0.000326607	0.000540157	0	0	6.34e-05	0.000572545	0	0.00151082	0.000345288	0.000731415	0.000449971	0.000112414	0.000914042	0.000756487	6.96e-05	0.000214444	0.000711063	0.00055054	0
ZOTU8229	0	0	0	0	0	1.39e-05	0	0.000362475	0.000494569	0	0	0	0	0	0	0	0	0	0	0	0	0	0	0	0	0	0	0	0	0.000108284	0.000163303	0.000135039	0	0	0	0.000157944	0.000129199	0.000847536	0.000230192	0.000177313	0.000286345	0.000281036	0.000247553	7.56e-05	1.74e-05	0.00133432	0	0.000183513	0.000655972
ZOTU12763	0	0	0	0	0.000207204	0.000236769	0.000262146	0.000638647	0.000418482	0	0	0	0	0	0	0	0	3.44e-05	0	0	0	0	0	0	0	0	0	0.000286555	0.000858095	0.00039704	0.00074653	0.000843996	0.000217783	0.000365772	8.46e-05	0.000454088	0.000452196	5.53e-05	4.6e-05	2.22e-05	2.05e-05	0	0	0	0	0	0	0	0
ZOTU1883	0	0	0	0	0	0	0	0.00046604	0.000760876	0	0	0	0	0	0	0	0	0	0	0	0	0	0	0	0	0	0	0	1.68e-05	0.000433135	0.000326607	0.000607677	0	0	0	0.000276401	0.000279931	0.00200829	0.000115096	0.000221641	0	0	0	0.000181557	0	0	0	0.000935917	0
ZOTU12254	0	0	0	0	0	0	0	0	0	1.64e-05	0	0	0	0	0	0	0	0	0	0	0	0	0	0	0	0.000376339	0.00621168	0	0	0	0	0	0	0	0	0	0	0	0	0	0	0	0	0	0	0	0	0	0
ZOTU1353	7.99e-05	2.09e-05	0	0	0.000765062	6.96e-05	0	0	5.71e-05	6.56e-05	0.000265575	0	0	0	0	0	8.47e-05	0.000120254	0	0	0	1.69e-05	0	0	0	0	0	0.00101249	0.00143016	0.00111893	0	0	0.00134629	0	0.000147982	0	0	0	0	0	0	0	0	0	0	0	0	0	0
ZOTU5556	0	0	0	0	0	6.96e-05	0.000415065	0.000500561	0.000475547	1.64e-05	0	0	0	0	0	0	1.69e-05	0	4.4e-05	0	0	0	0	0	0	0	0	1.91e-05	0	5.41e-05	0.000279949	0.000337598	0	0.000580933	2.11e-05	0.000118458	0.000581395	0.00086596	0.000322269	0.00075358	2.05e-05	1.87e-05	0	0.000423633	3.48e-05	0	0	0.000440432	0.000178902
ZOTU14240	2.66e-05	6.28e-05	0	0	0.000159388	6.96e-05	0	0	1.9e-05	0	0	0	0	0	0	0	6.77e-05	5.15e-05	0	0	0	0	0	0	0	0	0	0.00206319	0.00161524	0.00155207	0	3.38e-05	0.000692946	0.000150612	2.11e-05	0	0	0	0	0	0	0	0	0	0	0	0	0	0
ZOTU5202	0	0.0014017	0	0	0	0	0	0	0	0	0	0	0	0	0	0	0	0	0	0	0	0.000286543	6.55e-05	9.14e-05	0	0.00472134	0	0	0	1.8e-05	0	0	0	0	0	0	0	0	0	0	0	0	0	0	0	0	0	0	0
ZOTU2566	0	6.28e-05	0	0	3.19e-05	0.000222841	0.000327683	0.000379736	0.000209241	0	0	0	0	0	0	0	0	3.44e-05	0	0	0	3.37e-05	3.27e-05	0	0	0	0	0	0	0.000144378	4.67e-05	0.000135039	1.98e-05	0	0	3.95e-05	0.000258398	0.00119761	0.00322269	0.00214992	0.000879489	0.000693221	0	6.05e-05	0	0	0	0	0
ZOTU11613	0.000146506	0	0	0	0	0	0	0	0	0	0	0	0	0	0	0	1.69e-05	0	0	0	0	0.00055623	0.00539975	0.000420598	0	0	0	0	0	0	0	0	3.96e-05	0	0	0	0	0	0	0	0	0	0	0	0	0	0	0	0
ZOTU1973	0.000133188	4.18e-05	0	0	0.0012751	0.000334262	0	0	0	0.00016401	5.59e-05	0	0	0	0	0	0.000169325	0.000446659	0	0	0	0	1.64e-05	0	0	0	0	0.00124174	0.000269206	0.000523371	0	0	0.00180166	0	0.000105702	0	0	0	0	0	0	0	0	0	0	0	0	0	0
ZOTU1107	0	0	0	0	0	0	0	0	0	0	0	0	0	0	0	0	0	0	0	0	0	0	0	0	0	0	0	0	0	0	0	0	0	2.15e-05	0	0	0	0	0	0	0	0	0	0	1.74e-05	0	0	0.000128459	0.00981971
ZOTU8659	0	0	0	0	7.97e-05	0.00051532	0.000808284	0.000604125	0.000361416	0	0	0	0	0	0	0	0	3.44e-05	4.4e-05	0	0	0	0	0	0	0	0	1.91e-05	3.37e-05	0.000252662	0.000583226	0.000303838	0	0	0.000253684	0.000296144	0.000581395	0.000147398	0.000230192	0.000509774	0.000184079	0.000206093	9.52e-05	6.05e-05	0.000313414	2.38e-05	0	1.84e-05	0
ZOTU11839	1.33e-05	2.09e-05	0	0	0.000111572	0.000376045	0.000764593	0.000897558	0.000152175	0	0	0	0	0	0	0	0	0.000137433	0.000373643	0	0	0	0	0	0	0	0	0.000114622	0.000471111	0.000577513	0.000606555	0.000371358	1.98e-05	0.000516384	2.11e-05	0.000789718	6.46e-05	0.000110548	4.6e-05	0	0	0	0	0	0	0	0	0	0
ZOTU3043	0	0	0	0	0	0	0	0	0	0	0	0	0	0	0	0	0	0	0	0	0	0	0	0	0	0	0	0	8.41e-05	1.8e-05	0	0	0.00540498	0	0.00103587	0	0	0	0	0	0	0	0	0	0	0	0	0	0
ZOTU1727	0	0.000774075	0	0	0	0	0	0	0	0	0	0	0	0	0	0	0	0	0	0	0	0.00505663	0.00068724	0	0	0	0	0	0	0	0	0	0	0	0	0	0	0	0	0	0	0	0	0	0	0	0	0	0
ZOTU11640	0	0	0	0	0.000589735	0.000529248	0.000611674	5.18e-05	0	0	0	0	0	0	0	0	1.69e-05	1.72e-05	0	0	0	0	0	0	0	0	0	0.000305659	0.00240603	0.000577513	0.000303278	0	0.000178186	0.000623965	0.000274824	1.97e-05	0	0	0	0	0	0	0	0	0	0	0	0	0
ZOTU2672	0	2.09e-05	0	0	0	4.18e-05	0.000830129	0.00208855	0.000608701	0	0	0	0	0	0	0	0	0.00020615	2.2e-05	0	0	0	0	0	0	0	0	0	0	0.000126331	0.000676543	0.00158671	0	0	0	0.000177687	0	0	9.21e-05	0	2.05e-05	0	0	0	0	0	0	0	0
ZOTU8270	2.66e-05	0.000125526	0	0	0.00121135	0.00128134	0.00181318	0.000155347	0	8.2e-05	0	0	0	0	0	0	0	0.000652809	6.59e-05	0	0	0	0	0	0	0	0	3.82e-05	0.000151428	3.61e-05	0	3.38e-05	7.92e-05	0	0	0	0.000279931	0.000184247	0	0	0	0.000224829	3.81e-05	1.51e-05	0	0	0	0	0
ZOTU10708	1.33e-05	4.18e-05	0	0	0	0.000208914	0.000109228	0.000500561	0.000475547	0	0	0	0	0	0	0	0	3.44e-05	0.00021979	0	0	0	0	0	0	0	0	0	1.68e-05	0.000108284	0.00048991	0.000472638	0	0	0	0.000157944	0	0.000681713	0.000483403	0.000576267	0.000593144	0.00112414	5.71e-05	0.000105908	0	0	0	0	0
ZOTU4784	0	0	0	0	0	0	0	5.18e-05	0.000266307	0	0	0	0	0	0	0	0	0	0	0	0	0	0	0	0	0	0	0	0	1.8e-05	0	3.38e-05	0	0	0	3.95e-05	0	0	0	6.65e-05	2.05e-05	0.000168621	5.71e-05	0.000620319	0.00224613	0	0	0.00359686	0.00067585
ZOTU7308	0	0.000146447	0	0	0	0	2.18e-05	0.000258911	0.000627723	0	0	0	0	0	0	0	0	0	0	0	0	0	0	0	0	0	0	0	0	3.61e-05	7e-05	6.75e-05	0	0	0	0.000138201	0	0.000128973	0.000230192	0.000421118	0.000122719	0.000149886	0.000190425	0.000302595	0.000522357	0.00133432	0	0.000201864	9.94e-05
ZOTU1660	0.00010655	0.00585786	5.35e-05	0	0	0	0	0	0	1.64e-05	0	0	0	0	0	0	0	0	0.000417601	0	0	0	0	0	0	0	0	0	0	0	0	0	0	0	0	0	0	0	0	0	0	0	0	0	0	0	0	0	0
ZOTU3422	0	0	0	0	9.56e-05	0.000334262	0.000218455	0.000189868	0.000152175	4.92e-05	0	0	0	0	0	0	0	0.000120254	6.59e-05	0	0	0	0	0	0	0	0	0.000191037	0.000353333	0.000306804	0.000583226	0.000236319	7.92e-05	0.00103277	0.000422806	0.00106612	0.000366064	0.000128973	2.3e-05	6.65e-05	6.14e-05	3.75e-05	1.9e-05	0.000242076	0	0	0	0	0
ZOTU4584	0	6.28e-05	0	0	0	0.000222841	0.000240301	0.00046604	0.00161686	0	0	0	0	0	0	0	0	0	0	0	0	0	0	0	0	0	0	0	5.05e-05	0.000252662	0.000513239	0.000472638	0	0	6.34e-05	0.00053306	0.000667528	0.000479042	0.000644538	8.87e-05	0.000552238	0.000843107	0.000552234	0.00151297	0	0	0	0.000110108	0
ZOTU3283	4e-05	2.09e-05	0	0	0.000908511	0.000236769	6.55e-05	3.45e-05	5.71e-05	1.64e-05	0	0	0	0	0	0	8.47e-05	0.000240509	2.2e-05	0	0	0	0	0	0	0	0	0.000534902	0.000673015	0.000739939	0.000326607	0.000202559	0.000336574	2.15e-05	0.00065535	0.000256658	0.000667528	0.00027637	2.3e-05	0	0	0	0	0	0	0	0	0	0
ZOTU9459	0	0	0	0	0	0	2.18e-05	0	0.000114131	0	0	0	0	0	0	0	0	0	0	0	0	0	0	0	0	0	0	0	0	1.8e-05	4.67e-05	0	0	0	0	7.9e-05	0	0	9.21e-05	0.000598431	0.00153399	0.00177989	0.00230415	4.54e-05	0.00177601	0.00128666	0	7.34e-05	0
ZOTU7892	0.000492795	0.000146447	0	0	0.000414409	4.18e-05	6.55e-05	0	0	0	0	0	0	0	0	0	0.00233669	0.000927676	0	0	0	0.000134844	6.55e-05	0	0	0	0	0	0	5.41e-05	0	3.38e-05	0.000435566	0.000473352	0.000782191	0	0	0	0	0	0	0	0	0	0	0	0	0	0
ZOTU3065	0	0	0	0	0.000717246	6.96e-05	0	0	0	0	0	0	0	0	0	0	0	0	0	0	0	0	0	0	0	0	0	0.00275093	0.000386984	0.000234615	0	0	0.00223722	0	0	0	0	0	0	0	0	0	0	0	0	0	0	0	0
ZOTU2209	0	0	0	0	4.78e-05	0.000487465	0.000240301	0.000897558	0.000913051	0	0	0	0	0	0	0	0	6.87e-05	0	0	0	0	0	0	0	0	0	1.91e-05	6.73e-05	0.00019852	0.000606555	0.000405118	0	0	4.23e-05	0.000750232	0	0.000976509	0.000552461	0.000332462	0.000265892	0.000355979	0.000418936	0.000983433	0.000139295	9.53e-05	0	0.000770755	0
ZOTU8827	0	0	0	0	9.56e-05	8.36e-05	8.74e-05	0.000396997	0.00039946	0	0	0	0	0	0	0	3.39e-05	5.15e-05	0	0	0	0	0	0	0	0	0	0.000114622	0.000185079	0.000234615	0.000116645	0.000202559	0.000217783	8.61e-05	8.46e-05	0.000355373	8.61e-05	0.000736988	0.000460384	0.000731415	4.09e-05	1.87e-05	0	0.000423633	0	0.00016679	0	0.00097262	0
ZOTU7678	0	2.09e-05	0	0	0	0.000139276	2.18e-05	1.73e-05	1.9e-05	0	0	0	0	0	0	0	0	0	0	0	0	0	0	0	0	0	0	0	0	3.61e-05	7e-05	0	0	4.3e-05	8.46e-05	7.9e-05	0.00301464	0.0028374	0	0	0	0	0	0	0	0	0	0	0
ZOTU6197	0.000625982	0.000418419	0	0	0	6.96e-05	0.000393219	0.000155347	0.000418482	0	0	0	0	0	0	0	1.69e-05	0.000188971	0.000329685	0	0.00133365	0.000488808	0.000163629	0	0	0	0	0	1.68e-05	0.000108284	0.000349936	0.000202559	0	0	0	5.92e-05	0	0.00031322	0.00029925	0.000288133	6.14e-05	0	5.71e-05	1.51e-05	0	0	0	0	0
ZOTU12245	1.33e-05	4.18e-05	0	0	4.78e-05	0.000167131	0.000458756	0.000293432	0.000437504	1.64e-05	0	0	0	0	0	0	1.69e-05	0.000120254	0	0	0	0	0	0	0	0	0	0.000114622	0.000504762	0.000216567	0.000466581	0.000607677	5.94e-05	0.000279708	0.000190263	0.000691003	0.000172265	0.000257946	0.000598499	8.87e-05	0	0	0	0.000499281	0	0	0	0	0
ZOTU3666	2.66e-05	0.000104605	0	0	0.000191266	0.000779944	0.000677211	0.000293432	9.51e-05	0	0	0	0	0	0	0	3.39e-05	0.000257688	6.59e-05	0	0	0	0	0	0	0	0	0.000152829	0.00021873	0.000234615	0.000933162	0.000270079	7.92e-05	0.000688513	0.000443946	0.000651517	0	5.53e-05	2.3e-05	6.65e-05	0	0	0	0	0	0	0	0	0
ZOTU4505	0	0	0	0	0	6.96e-05	0	0.000207129	0.000247285	0	0	0	0	0	0	0	0	0.000103075	0	0	0	0	0	0	0	0	0	0	0.000117778	5.41e-05	4.67e-05	0.000168799	0.000197985	0.000989737	0.00143754	0.000809461	0.00148579	0.000350069	0	2.22e-05	2.05e-05	0	0	0	0	0	0	0	0
ZOTU9863	0	0	0	0	0.000207204	0.000445682	0.00174764	0.000621386	0.000228263	0	0	0	0	0	0	0	0	1.72e-05	4.4e-05	0	0	0	0	0	0	0	0	3.82e-05	6.73e-05	0.000433135	0.00100315	0.000776476	0	0	6.34e-05	0.000276401	2.15e-05	3.68e-05	2.3e-05	6.65e-05	6.14e-05	0.00013115	0	1.51e-05	0	0	0	0	0
ZOTU4593	0	2.09e-05	0	0	0	0.000208914	0.000262146	0.000396997	0.000779898	0	0	0	0	0	0	0	0	0	0	0	0	1.69e-05	0	0	0	0	0	0	1.68e-05	0.000252662	0.000513239	0.000472638	0	0	0	0.000592288	2.15e-05	0.000128973	0.000690576	0.000576267	0.000859036	0.0005246	0.0010283	0.0005598	0.000191531	0.00016679	0.000122597	0.000348675	0
ZOTU6007	0	0	0	0	0	0	0	0.000120825	0.000266307	0	0	0	0	0	0	0	0	0	0	0	0	0	0	0	0	0	0	0	0	9.02e-05	0	0.000168799	0	0	0	0.000138201	0	1.84e-05	0.000483403	0.000155149	0.000368158	0.00198599	0.000856914	0.000317724	0.000243767	0.00100074	2.45e-05	0.000367026	0.000159024
ZOTU10434	0	0	0	0	0	0	0	6.9e-05	0.000247285	0	0	0	0	0	0	0	0	0	0	0	0	0	0	0	0	0	0	0	0	0	4.67e-05	3.38e-05	0	0	0	0	0	0	0.000253211	0.000620595	0.00104312	0.000880579	0.00129489	0.000408503	0.000452709	4.77e-05	0	0.000623945	0.000278291
ZOTU8423	0	0	0	0	0	0	4.37e-05	0.000120825	0.000266307	0	0	0	0	0	0	0	0	0	0	0	0	0	0	0	0	0	0	0	0	1.8e-05	2.33e-05	0.000168799	0	0	4.23e-05	0.000118458	0	3.68e-05	0.000989826	0.00166231	0.000388612	0.000430921	0.00100925	0.000272335	0.000208943	0	0	0.000330324	0
ZOTU4878	0	0	0	0	0	1.39e-05	0	0.000138086	0.000285328	0	0	0	0	0	0	0	0	0	0	0	0	0	0	0	0	0	0	0	0	7.22e-05	0.000163303	6.75e-05	0	0	0	0.000118458	0	0	0.000529442	0.00048761	0.000204532	0.000112414	0.000114255	0.000680838	0.000417885	0.000285925	0.000809141	0.000110108	0.00139146
ZOTU5706	0	0	0	0	7.97e-05	0.000376045	0.00104858	0.000535082	7.61e-05	0	0	0	0	0	0	0	0	1.72e-05	0	0	0	0	0	0	0	0	0	3.82e-05	0.000235555	0.000306804	0.000956491	0.000202559	0.000138589	0.000817609	0.000528508	0.000197429	0.000581395	0.000128973	0	0	0	0	0	0	0	0	0	0	0
ZOTU1914	0	0	0	0	0	0	0	0	0	3.28e-05	0	0	0	0	0	0	0	0	0	0	0	0.00347222	0.00235625	0.000201156	0.000201505	0	0	0	0	0	0	0	0	0	0	0	0	0	0	0	0	0	0	0	0	0	0	0	0
ZOTU7885	0	0	0	0	0	0	0	0	0	0	0	0	0	0	0	0	0	0	0	0	0	0	0	0	0	0	0	0	0	0	0	0	0.00118791	0.00221615	0.00226201	0	0.000452196	0.000128973	0	0	0	0	0	0	0	0	0	0	0
ZOTU1555	0	0	0	0	0.000653491	0.000724234	0	0	0	0	0	0	0	0	0	0	5.08e-05	0.000103075	0	0	0	0	0	0	0	0	0	0.00166202	0.00156476	0.00111893	0	0	0.000237581	2.15e-05	8.46e-05	0	0	0	0	0	0	0	0	0	0	0	0	0	0
ZOTU7859	0.00135852	0.000711312	5.35e-05	1.63e-05	3.19e-05	1.39e-05	0	0	0	0.00034442	0.000167731	0	0	0	0	0	0.000101595	3.44e-05	0	0	0	0.000151699	0.000638152	0	0	0	0	7.64e-05	3.37e-05	3.61e-05	2.33e-05	0	0.00152448	0.000451836	0.000105702	9.87e-05	0.000236865	0	0	0	0	0	0	0	0	0	0	0	0
ZOTU2385	0	0.000167368	0	0	0	1.39e-05	8.74e-05	0	0	1.64e-05	0	0	0	0	0	0	1.69e-05	0.00163202	0.00340674	0.000511327	0	0	0	0	0	0	0	0	0	0	4.67e-05	0	0	0	0	0	2.15e-05	1.84e-05	4.6e-05	4.43e-05	6.14e-05	7.49e-05	1.9e-05	0	0	0	0	0	0
ZOTU2775	0	0	0	0	0	0	0	0	0	0	0	0	0	0	0	0	0	0	0	0	0	0	0	0	0	0.00615827	0	0	0	0	0	0	0	0	0	0	0	0	0	0	0	0	0	0	0	0	0	0	0
ZOTU6654	0	0	0	0	0.000956328	0.000194986	2.18e-05	0.000155347	0	0	0	0	0	0	0	0	0	6.87e-05	0	0	0	0	0	0	0	0	0	0.00099339	0.00146381	0.00113698	0.000233291	0	0.000851333	0	8.46e-05	1.97e-05	0	0	0	0	0	0	0	0	0	0	0	0	0
ZOTU5022	1.33e-05	0	0	0	0.000111572	0.00103064	2.18e-05	5.18e-05	3.8e-05	0	0	0	0	0	0	0	0	6.87e-05	0	0	0	0	0	0	0	0	0	0.000305659	0.00129556	0.00180473	0.0011198	3.38e-05	7.92e-05	0	8.46e-05	9.87e-05	0	0	0	2.22e-05	0	0	0	0	0	0	0	0	0
ZOTU3643	0	0	0	0	0.000844756	0.00178273	0.00139811	0.000310693	3.8e-05	0	0	0	0	0	0	0	1.69e-05	0	0	0	0	0	0	0	0	0	0	0.000171933	0.00111048	0.00113698	0.00109647	0.000405118	0.000118791	0.000279708	0.000126842	0.000217172	0	0.00027637	0	0	0	0	0	0	0	0	0	0	0
ZOTU5002	0	0	0	0	4.78e-05	1.39e-05	0	0	0	0	0	0	0	0	0	0	1.69e-05	0	0	0	0	0	0	0	0	0	0	0	1.68e-05	1.8e-05	2.33e-05	0	0.00483082	0	0.001205	0	0	0	0	0	0	0	0	0	0	0	0	0	0
ZOTU3128	0	0	0	0	0	0	0	0	0	0	0	0	0	0	0	0	0	0	0	0	0	0	0	0	0	0.00496083	0.00121007	0	0	0	0	0	0	0	0	0	0	0	0	0	0	0	0	0	0	0	0	0	0
ZOTU4594	0	0	2.67e-05	0	0	0	0	6.9e-05	0.00030435	0	0	0	0	0	0	0	0	0	0	0	1.83e-05	0	0	0	0	0	0	0	0	3.61e-05	0	6.75e-05	0	0	0	5.92e-05	0	0	0.000115096	0.000221641	0.000327252	0.000206093	0.000323723	0.00136168	0.000905419	0	0	0.00168832	0.000437315
ZOTU14616	0	0	0	0	0	0	0	1.73e-05	0	0	0	0	0	0	0	0	0	0	0	0	0	0	0	0	0	0	0	0	0	1.8e-05	0	0	0	0	0	0	0	0	0.00112794	0.000443282	0.00081813	0.00254806	0.00390372	0	0.000191531	0.000238271	0	0	0
ZOTU3059	0.00158493	0.000543944	2.67e-05	0	0.00012751	0	0	0	0	0	0	0	0	0	0	0	0.00238748	0.000377942	0	0	0	0.000387675	0.000147266	0	0	0	0	5.73e-05	0.000168254	0.000180473	0	0	0.000138589	0	0	0	0	0	0	0	0	0	0	0	0	0	0	0	0
ZOTU4182	1.33e-05	0	0	0	0.00130698	0.000139276	0	0	0	0	0	0	0	0	0	0	3.39e-05	1.72e-05	0	0	0	1.69e-05	0	0	0	0	0	0.00212051	0.00114413	0.000776033	0	0	0.000554357	0	0	0	0	0	0	0	0	0	0	0	0	0	0	0	0
ZOTU2187	0	0	0	0	0	0.000250696	0.000851975	0.000604125	5.71e-05	0	0	0	0	0	0	0	0	0.000137433	2.2e-05	0	0	0	0	0	0	0	0	1.91e-05	0.000302857	0.000433135	0.000723201	0.00155295	0	0.0005379	0.000211403	0.000394859	0	0	0	0	0	0	0	0	0	0	0	0	0
ZOTU11553	0	0	0	0	0	1.39e-05	4.37e-05	1.73e-05	0	0	0	0	0	0	0	0	1.69e-05	0	0	0	0	0	0	0	0	0	0	3.82e-05	1.68e-05	1.8e-05	7e-05	0	0.00241541	0.000796093	0.00118386	1.97e-05	0.000775194	0.000663289	0	0	0	0	0	0	0	0	0	0	0
ZOTU4203	0	0	0	0	0	4.18e-05	6.55e-05	0.000138086	0.000665766	0	0	0	0	0	0	0	0	0	0	0	0	0	0	0	0	0	0	1.91e-05	0	0.000180473	4.67e-05	0.000236319	0	0	0	0.000276401	0	0.000700138	0.000230192	0.000421118	0.000143173	0.000449657	3.81e-05	0.00118012	0	0.0014058	0	0.000880863	0
ZOTU3005	0	0	0	0	0	0	0	0	0	0	0	0	0	0	0	0	0	0	0	0	0	0	0	0	0	0	0	0	0	0	0	0	0	0	0	0	0	0	0	0	0.000204532	7.49e-05	0.000361808	0	0.00149742	0.000762468	0.000931738	0	9.94e-05
ZOTU14744	1.33e-05	6.28e-05	0	0	0.000573797	0.000264624	8.74e-05	0.000500561	0.000152175	0	0	0	0	0	0	0	0	0.000171792	0.000175832	0	0	1.69e-05	1.64e-05	0	0	0	0	0.00021014	0.000319682	0.000577513	0.000466581	0.000708956	0.000118791	0.000193644	0.000147982	0.000217172	0.000150732	0.000257946	0.000207173	0.000199477	2.05e-05	0.000149886	5.71e-05	1.51e-05	0	0	0	0	0
ZOTU14425	0	0	0	0	0	0	0	0.000172607	0.000285328	0	0	0	0	0	0	0	0	0	2.2e-05	0	0	0	0	0	0	0	0	0	1.68e-05	5.41e-05	2.33e-05	0.000101279	0	0	0	0.000276401	0	0.000110548	0.000805672	0.000620595	0.00143173	0.00121782	0.000342766	0.0005598	0	0	0	0	0
ZOTU4892	0	0	0	0	1.59e-05	0.000264624	0.000327683	0.000327954	0.000570657	0	0	0	0	0	0	0	0	0	0	0	0	0	0	0	0	0	0	0	1.68e-05	0.000270709	0.000326607	0.000168799	0	0.000623965	0	9.87e-05	0.000301464	0.000405343	0.000391326	0.000132985	0.000327252	0.000281036	0.000266596	0.000317724	0	0.00121518	0	0.000440432	0.000437315
ZOTU11464	2.66e-05	0	0	0	0.000956328	0.000250696	0	3.45e-05	3.8e-05	3.28e-05	0	0	0	0	0	0	5.08e-05	0.000223329	0	0	0	0	0	0	0	0	0	0.00164291	0.00087492	0.000812128	4.67e-05	0	0.000930527	0	0.000105702	0	0	0	0	0	0	0	0	0	0	0	0	0	0
ZOTU4439	0	0	0	0	0	1.39e-05	4.37e-05	0.000120825	0.000418482	0	0	0	0	0	0	0	0	0	0	0	0	0	0	0	0	0	0	0	0	0.000234615	7e-05	0.000270079	0	0	0	0.000138201	0	0.000755412	0.000345288	0.000177313	0.000368158	9.37e-05	0.00097117	0.00121038	0.000557181	0.000119136	0.00129953	0.000844161	0
ZOTU4709	0.000159825	0	0	0	0.000111572	0	0	0	0	9.84e-05	0.00034944	0	0	0	0	0	0.00409767	0.000755884	0	0	0	0	0	0	0	0	0	0	0.000134603	3.61e-05	0	0	7.92e-05	0	0.000190263	0	0	0	0	0	0	0	0	0	0	0	0	0	0
ZOTU5036	0	0	0	0	0.000111572	0.000835655	0.00146365	0.000189868	1.9e-05	0	0	0	0	0	0	0	5.08e-05	1.72e-05	0	0	0	0	0	0	0	0	0	3.82e-05	0.000201905	0.000270709	0.000443252	0.000472638	0	0.000731545	6.34e-05	0.000217172	0.000602929	0.00027637	0	0	0	0	0	0	0	0	0	0	0
ZOTU3061	0	0	0	0	0	0	0	0.000172607	0.000323372	0	0	0	0	0	0	0	0	0	0	0	0	0	0	0	0	0	0	0	0	0	0	6.75e-05	0	0	0	0.000138201	0	0	0	2.22e-05	0	0	0	0	0.00212425	0.00131049	0	0	0.00166975
ZOTU3389	0	0	0	0	0	2.79e-05	0	0.00024165	0.000684788	0	0	0	0	0	0	0	0	0	0	0	0	0	0	0	0	0	0	0	0	0.000216567	2.33e-05	0.000101279	0	0	0	0.000118458	0	0	0.00103586	0.000620595	0.00194306	0.0013115	0.00106638	0.000817006	1.74e-05	0.000190617	2.45e-05	0.000330324	0
ZOTU2706	0	0	0	0	0.00191266	0.000111421	0	0	0	0	0	0	0	0	0	0	0	1.72e-05	0	0	0	0	0	0	0	0	0	0.00110801	0.000858095	0.000577513	2.33e-05	6.75e-05	0.0012275	0	2.11e-05	0	0	1.84e-05	0	2.22e-05	0	1.87e-05	0	0	0	0	0	0	0
ZOTU4647	0.000785808	0.00186196	0.000187121	0	0	0	0	0	0	0	0	0	0	0	0	0	1.69e-05	0.000876138	0.000307706	0.00193168	0	0	0	0	0	0	0	0	0	0	0	0	0	0	0	0	0	0	0	0	0	0	0	0	0	0	0	0	0
ZOTU2320	0	4.18e-05	0	0	0	5.57e-05	0.00019661	0.000535082	0.000836963	0	0	0	0	0	0	0	0	1.72e-05	0.000197811	0	0	1.69e-05	1.64e-05	0	0	0	0	0	0	0.000126331	0.000233291	0.000236319	0	0	0.000147982	0.000217172	0	0.000663289	0.000943787	0.000842236	0.000327252	0.000899314	0.000742659	0.000620319	0.000574593	0	0	0.000238567	0
ZOTU2821	0	0	0	0	0	0	0	0	0	0	0	0	0	0	0	0	0	0	0	0	0	0	0	0	0	0	0	0	0	0	0	0	0	0	0	0	0	0	0	0	0	0	0	0	0	0.00209679	0	1.84e-05	1.99e-05
ZOTU11988	0.000159825	6.28e-05	0	0	6.38e-05	0.000181058	0.00019661	0.000310693	0.000209241	1.64e-05	0	0	0	0	0	0	6.77e-05	0.000326404	0	0	0	6.74e-05	1.64e-05	1.83e-05	0	0	0	5.73e-05	6.73e-05	0.000144378	0.000513239	0.000877756	0	0	0.000105702	0.000967404	0.00047373	0.000552741	0.000115096	0.000221641	6.14e-05	7.49e-05	0	0	0	0	0	1.84e-05	0
ZOTU150	0	0	0	0	0	0	0	0	0	0	0	0	0	0	0.00594297	0	0	0	0	0	0	0	0	0	0	0	0	0	0	0	0	0	0	0	0	0	0	0	0	0	0	0	0	0	0	0	0	0	0
ZOTU12350	0	0.000146447	0	0	7.97e-05	5.57e-05	0	0	3.8e-05	0.000131208	0.000195687	0	0	0	0	0	3.39e-05	0.000893317	0.0039782	0.000184646	0	5.06e-05	0	0	0	0	0	0	1.68e-05	0	0	0.000135039	0	0	0	0	0	0	0	0	0	0	0	0	0	0	0	0	0
ZOTU6720	0	0	0	0	0	0	0	0.000155347	7.61e-05	0	0	0	0	0	0	0	0	0	0	0	0	0	0	0	0	0	0	0	0	0	2.33e-05	6.75e-05	0	0	0	0	0	0	0.000115096	0.000221641	0.000102266	0.00108667	0.000514149	4.54e-05	0.00200237	7.15e-05	0	0.000752404	0.000695728
ZOTU1692	0	6.28e-05	0	0	1.59e-05	0.00045961	0.000502447	0.000535082	0.000380438	0	0	0	0	0	0	0	0	1.72e-05	0	0	0	0	0	0	0	0	0	1.91e-05	3.37e-05	0.000126331	0.00102648	0.000438878	0	0	0.000169122	0.000236915	0.000236865	0.000792262	0.00103586	0.0011747	0.000368158	0.000861843	0.00015234	3.03e-05	0	0	0	0	0
ZOTU3898	0	0	0	0	0	0	0	0	0	0	0	0	0	0	0	0	0	0	0	0	0	0	0	0	0	0	0	0	0	0	0	0	0.000752341	0.000817609	0.000190263	0	0.00320844	0.000939659	0	0	0	0	0	0	0	0	0	0	0
ZOTU7357	0.00203777	0.000481182	0	0	3.19e-05	0.000334262	0.000349528	0.000327954	7.61e-05	0	0	0	0	0	0	0	0.00020319	0.0004123	4.4e-05	0	0	0.000151699	1.64e-05	0	0	0	0	0	8.41e-05	0.00019852	0.000419923	0.000168799	0	0.000129096	6.34e-05	0.000375116	0	0	0	0	0	0	0	0	0	0	0	0	0
ZOTU1145	0	0	0	0	0	0	0	6.9e-05	0.00030435	0	0	0	0	0	0	0	0	0	0	0	0	0	0	0	0	0	0	0	0	0	0	0	0	0	0	1.97e-05	0	0	0	0.000132985	0	0	0	0.000922914	0.00605934	0	0	0.000678999	0.000477071
ZOTU5030	0	0	0	0	9.56e-05	0.000473538	0.00266515	0.000776733	0	0	0	0	0	0	0	0	0	1.72e-05	0	0	0	0	0	0	0	0	0	1.91e-05	0.000134603	5.41e-05	0.000769859	0.000540157	1.98e-05	0	0.000147982	0.000177687	0	0	0	0	0	0	0	0	0	0	0	0	0
ZOTU3595	0	0	0	0	0	2.79e-05	0	0	0.000152175	0	0	0	0	0	0	0	0	0	0	0	0	0	0	0	0	0	0	0	0	0	0	0	0	0	0	1.97e-05	0	0	0.000184154	0.000110821	0.000593144	0.00329749	0.00142819	0	0.000104471	7.15e-05	0	0.000678999	0.000715606
ZOTU4588	0	4.18e-05	0.00523938	0.000489029	0	0	0	0	0	0	0	0	0	0	0	0	0	0	0	0	0	6.74e-05	3.27e-05	0	0	0	0	0	0	0	0	0	0	0	0	0	0	0	0	0	0	0	0	0	0	0	0	0	0
ZOTU2636	0	0	0	0	0	0	0	0.000604125	0.000951095	0	0	0	0	0	0	0	0	0	0	0	0	0	0	0	0	0	0	0	0	7.22e-05	4.67e-05	0.000540157	0	0	0	0.000217172	0.00163652	0.00165822	0.000115096	2.22e-05	0	0	0	0	0	0	0	0	0
ZOTU13082	6.66e-05	0.000313814	0	0	0.00012751	0.000529248	0.000742747	0.000586865	0.000456525	0	0	0	0	0	0	0	1.69e-05	0.000120254	0.000109895	0	0	0	0	0	0	0	0	9.55e-05	0.000269206	0.000216567	0.000863175	0.000236319	5.94e-05	0.000365772	0.000169122	7.9e-05	0	0.000239521	0.000115096	4.43e-05	2.05e-05	0	1.9e-05	0	0	0	0	0	0
ZOTU7434	0	0	0	0	0	0	0	0.000155347	0.000266307	0	0	0	0	0	0	0	0	0	0	0	0	0	0	0	0	0	0	0	0	1.8e-05	7e-05	0.000168799	0	0	0	0.000157944	0	0	0.000483403	0.000421118	0.00179988	0.000430921	0.000742659	0.000378243	0.000313414	0	0	0.000330324	0.000119268
ZOTU5006	0	0	0	0	0.000143449	0.000891365	0.00063352	0.000828515	1.9e-05	0	0	0	0	0	0	0	0	1.72e-05	0	0	0	0	0	0	0	0	0	0.000133726	0.000689841	0.000559466	0.000886504	0.000405118	5.94e-05	0.000193644	6.34e-05	0.000157944	0	0.000147398	2.3e-05	0	0	0	0	0	0	0	0	0	0
ZOTU1763	0	0.000753154	0	0	0	0	0	0	0	0	0	0	0	0	0	0	0	0	6.59e-05	0	0.00115096	0	0	0	0	0	0	0	0	7.22e-05	0	0	0	0	0	0	0	0	0.00140417	2.22e-05	0.00214759	0.00198599	0.000361808	0	0.000626828	0	0	0	0
ZOTU11240	0.000146506	8.37e-05	0	0	3.19e-05	2.79e-05	2.18e-05	1.73e-05	0	8.2e-05	0.000125798	0	0	0	0	0	0.00353889	0.000326404	0	0	0	0.000471953	0.000278169	0	0	0	0	0	0.000487936	9.02e-05	0	0	3.96e-05	0	4.23e-05	1.97e-05	0	0	0	0	0	0	0	0	0	0	0	0	0
ZOTU1515	0	0	0	0	0	0.000153203	0.000589829	0.00024165	0.000380438	0	0	0	0	0	0	0	0	0	0	0	0	0	0	0	0	0	0	0	0	0.000126331	0.0016097	0.00118159	0	0.000839125	0.000317105	0.000631774	0.000753661	0.0014924	0	0.000110821	0	0	0	1.51e-05	0	0	0	0.000110108	0
ZOTU2742	0	2.09e-05	0	0	3.19e-05	0.000417827	0	3.45e-05	0.000209241	0	0	0	0	0	0	0	0	6.87e-05	0	0	0	0	0	0	0	0	0	3.82e-05	3.37e-05	0.000108284	0.000373265	0.000405118	1.98e-05	0	0.000317105	0.000414602	0.00204565	0.00125288	2.3e-05	0	0	0	0	0	0	0	0	0	0
ZOTU7298	0.00010655	0	0	0	0.00255021	0.000181058	0	0	0	1.64e-05	0	0	0	0	0	0	3.39e-05	0.000120254	0	0	0	1.69e-05	3.27e-05	0	0	0	0	0.00078325	0.000403809	0.000234615	0	0	0.00120771	0	0.000126842	0	0	0	0	0	0	0	0	0	0	0	0	0	0
ZOTU13100	0	0	0	0	0	0	0	0	0	0	0	0	0	0	0	0	0	0	0	0	0	0	0	0	0	0	0	0	0	0	0	0	0.000989923	0.000193644	0.00429148	0	0	0.000331644	0	0	0	0	0	0	0	0	0	0	0
ZOTU4034	0	0	0	0	0	0	0	0.000224389	0.000932073	0	0	0	0	0	0	0	0	0	0	0	0	0	0	0	0	0	0	1.91e-05	0	7.22e-05	0	0.000101279	0	0	0	0.000217172	0	0.000184247	0.000437365	0.00190611	0.000859036	0.00138644	0	0.00170966	0	0	0	0.000495486	0
ZOTU11316	0	0	0	0	0	1.39e-05	0	0.000310693	0.000456525	0	0	0	0	0	0	0	0	1.72e-05	0.000703328	0.00227257	0	1.69e-05	1.64e-05	0	0	0	0	0	0	0.000108284	4.67e-05	0.000101279	0	0	0	0.000276401	0	0.000165822	0.000184154	0.000243805	0.000163626	0.000243564	7.62e-05	0.000226946	0.000121883	0	0	3.67e-05	0
ZOTU11862	0	0.000125526	0	0	0	2.79e-05	0	0	5.71e-05	0	0	0	0	0	0	0	0	0	4.4e-05	0.0020027	0	0	0	0	0	0	0	0	0	3.61e-05	0	0	0	0	0	1.97e-05	0	0	0.000253211	0.000132985	0.000102266	0	0.00015234	0.000332854	0.000208943	0	0	9.18e-05	0
ZOTU2533	0	0	0.00187121	0.0033091	0	0	0	0	0	0	0	0	0	0	0	0	0	0	2.2e-05	0	0	0.000404531	0.00011454	0	0	0	0	0	0	0	0	0	0	0	0	0	0	0	0	0	0	0	0	0	6.96e-05	0	0	0	0
ZOTU1719	0	0.000188288	0	0	0	0.000125348	2.18e-05	0.000276172	0.000190219	0	0	0	0	0	0	0	0	3.44e-05	0.000109895	0	0	0	0	0	0	0	0	0	1.68e-05	9.02e-05	0	0.000236319	0	0	8.46e-05	0.000552803	0.00047373	0.000515891	0.00103586	0.00210559	0.000736317	0.000224829	0.000571276	0.00057493	0.000121883	4.77e-05	0	5.51e-05	0
ZOTU12111	0	0	0	0	0.000510041	0.000571031	0.000109228	0.000138086	3.8e-05	0	0	0	0	0	0	0	0	5.15e-05	0	0	0	0	0	0	0	0	0	9.55e-05	0.000757142	0.000342898	0.00025662	3.38e-05	0.000296977	0.000172128	0.00213517	5.92e-05	0	9.21e-05	0	8.87e-05	0	0	0	0	0	0	0	0	0
ZOTU1578	0	0	0	0	0	0	0	0	0	0	0	0	0	0	0	0	0	0	0	0	0	0	0	0	0	0	0	0	0	0	0	0	0	0	0	0	0	0	0	0	0	0	0	0.000166427	0	4.77e-05	0	0	9.94e-05
ZOTU2580	0	0	2.67e-05	0	0.000175327	0.000821727	0.000895666	0.000327954	0.00030435	0	0	0	0	0	0	0	0	1.72e-05	2.2e-05	0	0	0	0	0	0	0	0	9.55e-05	0.000471111	0.000378993	0.000583226	0.000675197	0	0	0.000147982	0.000375116	0.000366064	0.000847536	0	0	0	0	0	0.000408503	0.000522357	0	7.36e-05	0.000477134	0.000119268
ZOTU2957	0	0	0	0	0.00027096	0.000320334	0.000109228	0.000155347	1.9e-05	1.64e-05	0	0	0	0	0	0	1.69e-05	5.15e-05	0	0	0	0	0	0	0	0	0	0.000343866	0.000673015	0.000703844	7e-05	0.000236319	0.000395969	0.00137703	0.000486227	3.95e-05	0.000258398	0.000221096	0	0	0	0	0	0	0	0	0	0	0
ZOTU14016	0	0	0	0	0	0	0	0.000138086	0.000342394	0	0	0	0	0	0	0	0	0	0	0	0	0	0	0	0	0	0	0	0	3.61e-05	0	0.000135039	0	0	0	3.95e-05	0	0	9.21e-05	0.000243805	0.000163626	0.000281036	0.000437978	0.000544671	0.000261178	0	0	0.000403729	0.00264377
ZOTU3412	0	0	0	0	0	0	0	0	0	0	0	0	0	0	0	0	0	0	0	0	0	0	0.000179991	0.000384025	0.00171279	0.00218961	0.00129074	0	0	0	0	0	0	0	0	0	0	0	0	0	0	0	0	0	0	0	0	0	0
ZOTU5097	0	0	0	0	0	1.39e-05	2.18e-05	0.000189868	0.00030435	0	0	0	0	0	0	0	0	0	0	0	0	0	0	0	0	0	0	0	0	0	0.000116645	0.000236319	0	0	2.11e-05	0.000730489	0.00217485	0.00189774	0	2.22e-05	0	0	0	1.51e-05	0	0	0	0	0
ZOTU3185	0	6.28e-05	0	0	0.000175327	0.000543175	0.000808284	0.000120825	0.000475547	0	0	0	0	0	0	0	0	6.87e-05	8.79e-05	0	0	0	0	0	0	0	0	0.00021014	0.000521587	0.000505324	0.000209962	0.000405118	0.000217783	0	0.000169122	0.000651517	0	0.000350069	0.000161134	0	0	0	0	0	0	0	0	0	0
ZOTU1522	1.33e-05	0.000188288	0	0	0.000111572	0.000584958	0.000720902	0.000431518	0.000418482	0	0	0	0	0	0	0	1.69e-05	0.000120254	0.000175832	0.00044031	0.000200961	0	0	0	0	0	0	1.91e-05	0.000235555	0.00019852	0.000723201	0.000506397	1.98e-05	0.000344256	0.000295964	0.000789718	0.00040913	0.000700138	0.000161134	0.000199477	4.09e-05	3.75e-05	1.9e-05	4.54e-05	0	0	0	0.000128459	0
ZOTU10445	2.66e-05	4.18e-05	0	0	0.000940389	0.000222841	6.55e-05	0.000207129	1.9e-05	0	0	0	0	0	0	0	1.69e-05	8.59e-05	0	0	0	0	0	0	0	0	0	0.000649524	0.00137968	0.000451182	0.00025662	6.75e-05	0.000316775	0	0.000401666	7.9e-05	0.000344531	0.000147398	0	0	0	0	0	0	0	0	0	0	0
ZOTU3340	0	0	0	0	0	0	0	0	0	0	0	0	0	0	0	0	0	0	0	0	0	0	0	0	0	0	0	0	0	0	0	0	0	0	0	0	0	0	0	0	0	0	0	0	0	0.00297839	0	0	0.00514839
ZOTU12798	0	2.09e-05	0	0	0	0.000181058	0.000174764	0.000258911	0.000570657	0	0	0	0	0	0	0	0	0	8.79e-05	0	0	0	0	0	0	0	0	1.91e-05	1.68e-05	0.000162426	0.000419923	0.000472638	0	0.000172128	2.11e-05	0.000691003	0.000624462	0.00031322	0.000759634	0.00037679	0.000306799	0.000281036	0.000495106	0.000287465	0.000383062	0.000262098	7.36e-05	0.000367026	0.000258413
ZOTU2208	0	0	0	0	1.59e-05	5.57e-05	2.18e-05	0.000379736	0.00039946	0	0	0	0	0	0	0	0	0	0	0	0	0	0	0	0	0	0	0	3.37e-05	1.8e-05	0.000209962	0.000270079	7.92e-05	0	0.00069763	0.00033563	0.000796727	0.00211884	6.91e-05	0	0.000102266	5.62e-05	0	4.54e-05	0	0	0	0	0
ZOTU2062	0	0	0	0	0	0	0	0	0	0	0	0	0	0	0	0	0	0	0	0	0	0	0	0	0	0	0	0	0	0	0	0	0	0	0	0	0	0	0	0	0	0	0	0	0.000104471	0.00131049	0	0	0.00310096
ZOTU5795	0	0	0	0	0	0	0	3.45e-05	0.000152175	0	0	0	0	0	0	0	0	0	0	0	0	0	0	0	0	0	0	0	0	7.22e-05	0	0	0	0	0	5.92e-05	0	0	0.000690576	0.000332462	6.14e-05	7.49e-05	0.000418936	0.0014222	0.000748712	0.00016679	7.36e-05	0.00269764	0.000159024
ZOTU11173	0	0	0	0	0	5.57e-05	0	0.000189868	0.000627723	0	0	0	0	0	0	0	0	0	0	0	0	0	0	0	0	0	0	0	0	0.000216567	0.000139974	0.000168799	0	0	0	5.92e-05	0	0.00031322	0.000391326	0.000531938	0.000511331	0.000206093	0.000533191	0.000953173	0.000853183	0.000690986	0	0.000990971	0
ZOTU11113	1.33e-05	0	0	0	4.78e-05	4.18e-05	0.00019661	0.000189868	9.51e-05	0	0.000111821	0	0	0	0	0	0	0.000188971	2.2e-05	0	0	0	0	0	0	0	0	0.000191037	0.000185079	0.000252662	0.000303278	0.000202559	0.000138589	0.00178583	0.0010993	0.000572545	0	0	2.3e-05	0	2.05e-05	0	0	0	0	0	0	0	0
ZOTU3563	0	0	0	0	0	1.39e-05	2.18e-05	0.000189868	0.000209241	0	0	0	0	0	0	0	0	1.72e-05	0.00021979	0	0	0	0	0	0	0	0	0	0	0	4.67e-05	0	0	0	0	3.95e-05	0	0	0.00126606	0.0017288	0.00161581	0.00110541	0.00127585	0.000105908	3.48e-05	0	0	0.000146811	0
ZOTU1821	1.33e-05	0.000711312	0	0	0	0	0	0	0	0	0	0	0	0	0	0	0	0	0.00215394	0.00157659	0.00107788	5.06e-05	6.55e-05	0	0	0	0	0	0	0	0	0	0	0	0	0	0	0	0	0	0	0	0	0	0	0	0	0	0
ZOTU13966	0	0	0	0	0	0	0	5.18e-05	7.61e-05	0	0	0	0	0	0	0	0	0	2.2e-05	0	0	0	0	0	0	0	0	0	0	3.61e-05	0	0.000101279	0	0	0	0	0	0	2.3e-05	0.000132985	0	0.00013115	0.000514149	0.000181557	0	0.00169173	0.0010053	0.000367026	9.94e-05
ZOTU11339	0	0	0	0	0.00117947	0.000236769	0	1.73e-05	0	0	0	0	0	0	0	0	0	8.59e-05	2.2e-05	0	0	0	0	0	0	0	0	9.55e-05	0.00065619	0.000270709	0	3.38e-05	0.000237581	0.000559416	0.00150096	0	0.000732127	0	0	0	0	0	0	0	0	0	0	0	0
ZOTU7953	0	0	0	0	4.78e-05	0.000139276	0.000939357	0.000379736	0.000152175	0	0	0	0	0	0	0	0	3.44e-05	0.000197811	0	0	0	0	0	0	0	0	0.000114622	5.05e-05	0.000144378	0.000676543	0.000708956	0	0	2.11e-05	0.000493574	0.000215332	0.000405343	0.000115096	0.000110821	0.000490878	7.49e-05	0.000114255	0	0	0	0	0	0
ZOTU5836	0	4.18e-05	0	0	0	2.79e-05	4.37e-05	0.000863036	0.000970117	0	0	0	0	0	0	0	0	1.72e-05	0	0	0	0	0	0	0	0	0	0	1.68e-05	1.8e-05	0.000303278	0.000506397	0	0	0	0.000217172	0	0.00175034	0.000690576	0.000155149	0	0	0	0	0	0	0	0	0
ZOTU1754	1.33e-05	0.000418419	0	0	0	0	0	0	0	1.64e-05	0	0.00406858	0	0	0	0	0	0	0.000263748	0.000269867	0.000529806	0	0	0	0	0	4.03e-05	0	0	0	0	0	0	0	0	0	0	0	0	0	0	0	0	0	0	0	0	0	0
ZOTU13501	0	0	0	0	0	0	0	0	0	0	0	0	0	0	0	0	0	0	0	0	0	0	0	0	0.00144412	0	0.00415457	0	0	0	0	0	0	0	0	0	0	0	0	0	0	0	0	0	0	0	0	0	0
ZOTU9233	0	0.000104605	0	0	0	1.39e-05	0	0.000276172	0.000989138	0	0	0	0	0	0	0	0	0	0.000241769	2.84e-05	0	0.000573085	0.00011454	0	0	0	0	0	0	0.00019852	2.33e-05	0.000270079	0	0	2.11e-05	0.000217172	0	0.000350069	0.00103586	0.00128552	0.000265892	0.000187357	5.71e-05	0.000983433	0.00027859	0	0	0.000458783	0
ZOTU10567	0.00125197	0.000564865	0	0	0.000175327	0.000125348	0.00019661	0.000345214	3.8e-05	0	0	0	0	0	0	0	0.000118528	0.000154613	0.000769265	0	0	0	0	0	0	0	0	9.55e-05	0.000117778	0.000126331	0.000303278	0.000168799	7.92e-05	0.000344256	4.23e-05	9.87e-05	0.000279931	5.53e-05	0.000115096	0	2.05e-05	0	0	0	0	0	0	0	0
ZOTU3019	0	0	0	0	0.000733185	8.36e-05	0	0	0	0	0	0	0	0	0	0	0	0	0	0	0	0	0	0	0	0	0	0.00227334	0.000555238	0.000216567	0	0	0.00172247	0	0	0	0	0	0	0	0	0	0	0	0	0	0	0	0
ZOTU3326	0	0.000251051	8.02e-05	0	0	1.39e-05	2.18e-05	0.000276172	0.00039946	0	0	0	0	0	0	0	0	0	0.000109895	0	0	0	0	0	0	0	0	0	0	0.000108284	9.33e-05	0.000101279	0	0	0	0.000256658	0	0.000608015	0.000828691	0.000664923	0.000511331	0.000318507	0.00022851	0.000529541	3.48e-05	0	0	0.000146811	0
ZOTU8277	0	8.37e-05	0	0	0.000111572	0.000877437	0.000742747	0.000362475	0.000114131	0	0	0	0	0	0	0	8.47e-05	0.000103075	0	0	0	0	1.64e-05	0	0	0	0	0.000133726	0.000353333	0.000342898	0.000629885	0.000472638	0.000237581	0.00021516	0.000126842	0.000256658	8.61e-05	0.000202672	0	0	0	0	0	0	0	0	0	1.84e-05	0
ZOTU3510	0	0.000167368	0	0	0	0.000306407	0.000240301	0.000103564	0.000114131	0	0	0	0	0	0	0	0	5.15e-05	0.000857181	0.00177544	0.000127884	0	0	0	0	0	0	0	0.000235555	0.000252662	0.000466581	0.000405118	0	0	8.46e-05	0.000454088	0.000344531	0.000294795	0.000644538	0.000642759	6.14e-05	0.000318507	0	0	0	0	0	0	0
ZOTU11009	2.66e-05	4.18e-05	0	0	0.00039847	0.00051532	0.000131073	0.00046604	0.000133153	6.56e-05	0	0	0	0	0	0	0.000101595	0.000274867	0	0	0	0	0	0	0	0	0	3.82e-05	0.000420635	0.000469229	0.000513239	0.000472638	0.000197985	0.00043032	0.000253684	0.000296144	2.15e-05	0.000221096	4.6e-05	0	0	0	0	0	0	0	0	0	0
ZOTU7609	0	0	0	0	0	0	0	3.45e-05	0.000285328	0	0	0	0	0	0	0	0	0	0	0	0	0	0	0	0	0	0	0	0	9.02e-05	2.33e-05	0.000135039	0	0	0	3.95e-05	0	0	0.000920768	0.000687087	0.00118629	0.0007869	0.00100925	9.08e-05	0	0	0	0	0.000238535
ZOTU7045	0	4.18e-05	2.67e-05	0	0	4.18e-05	0.000218455	0.00024165	0.000570657	0	0	0	0	0	0	0	0	0	6.59e-05	0.000213053	0	0	0	0	0	0	0	0	0	0.000126331	4.67e-05	0.000337598	0	0	8.46e-05	0.000138201	0	0.000663289	0.000253211	0.000465446	0.000368158	0.000337243	0.000342766	0.000317724	0.000191531	7.15e-05	0	0.000183513	0.000178902
ZOTU1718	7.99e-05	0	2.67e-05	0	1.59e-05	8.36e-05	0	0	0	9.84e-05	0.00034944	0.00482847	0	0	0	0	1.69e-05	0	0	0	0	0	0	1.83e-05	0	0	0	0	0	0	0	0	0	0	0	0	0	0	0	0	0	0	0	0	0	0	0	0	0
ZOTU3054	0	0	0	0	0	0	2.18e-05	0.000535082	0.00108425	0	0	0	0	0	0	0	0	0	0	0	0	0	0	0	0	0	0	0	0	5.41e-05	2.33e-05	0.000303838	0	0	0	0.000157944	0	0.0017872	0.000460384	0.000443282	0.000163626	0	0	0.000393373	0	0	0	7.34e-05	0
ZOTU12919	0.000359607	4.18e-05	2.67e-05	0	0	0	0	0	0	1.64e-05	0	0	0	0	0	0	0.000186258	3.44e-05	0	0	0	8.43e-05	1.64e-05	0	0	0	0	0	0	1.8e-05	0	0	0	0	0	0	0	0	0	0	0	0	0	0	0	0	0	0	0
ZOTU1405	0	0	0	0	0	0	0	0	0	0	0	0	0	0	0	0	0	0	0	0	0	0	0	0	0	0	0	0	0	0	0	0	0	0	0	1.97e-05	0	0	0	0	0	0	0	0	0	0.00216827	0	0	0
ZOTU13659	0	0	0	0	0	0	0	1.73e-05	0	0	0	0	0	0	0	0	0	0	0	0	0	0	0	0	0	0	0	0	0	0	0	0	0	0	0	0	0	0	4.6e-05	0.000132985	0.00069541	0.0007869	0.00150436	0.000136168	1.74e-05	2.38e-05	0.000490388	0.000440432	0.000139146
ZOTU2854	0	0	0	0	0	0	0	0	0	0	0	0	0	0	0	0	0	0	0	0	0	0	1.64e-05	0	0	0.00547402	0	0	0	0	0	0	0	0	0	0	0	0	0	0	0	0	0	0	0	0	0	0	0
ZOTU9231	0	0	0	0	0	0	0	0	0	0	0	0	0	0	0	0	0	0	0	0	0	0.00483751	0.000539974	0.000109721	0	0	0	0	0	0	0	0	0	0	0	0	0	0	0	0	0	0	0	0	0	0	0	0	0
ZOTU12621	0.000146506	0.000313814	0	0	0	4.18e-05	0.000502447	0.000621386	0.000665766	0	0	0	0	0	0	0	1.69e-05	8.59e-05	0.000109895	0	0	0	0	0	0	0	0	1.91e-05	0	7.22e-05	0.000443252	0.000641437	0	0	4.23e-05	0.000651517	0	0.000110548	6.91e-05	0.000310297	0.000102266	3.75e-05	7.62e-05	0.000151297	6.96e-05	0	0	0.000183513	0
ZOTU1702	0	0	0	0	0	0	0	0	0	0	0	0	0	0	0	0	0	0	0	0	0	0.00446669	0.000539974	0.000201156	0.000268673	0	0	0	0	0	0	0	0	0	0	0	0	0	0	0	0	0	0	0	0	0	0	0	0
ZOTU12693	0	0	0	0	0	1.39e-05	2.18e-05	0.000155347	0.000418482	0	0	0	0	0	0	0	0	0	0	0	0	0	0	0	0	0	0	0	0	0.000180473	2.33e-05	0.000101279	0	0	0	0.000177687	0	0	0.000736614	0.000332462	0.000347705	0.000412186	0.000571276	0.00155836	0.000800947	2.38e-05	0	0.00108273	0.000298169
ZOTU11117	0	0	0	0	0	0	0	1.73e-05	7.61e-05	0	0	0	0	0	0	0	0	0	0	0	0	0	0	0	0	0	0	0	0	0.000126331	2.33e-05	0	0	0	0	0	0.00150732	0.00158452	0.000345288	0.000664923	0.000143173	0.000281036	0.000704574	0	0	0	0	0	0
ZOTU4099	1.33e-05	0.000418419	5.35e-05	0	3.19e-05	0.000306407	0.000589829	0.000103564	0.000171197	0	0	0	0	0	0	0	0	1.72e-05	0.00065937	0.000340885	0.00120577	0.000252832	0.00011454	0	0	0	0	0	1.68e-05	0.000144378	0.000233291	0.000270079	0	0	2.11e-05	0.000177687	0.000861326	0.000405343	0.000529442	0.000132985	6.14e-05	0.000187357	0.00022851	9.08e-05	0	9.53e-05	0	0.000110108	0
ZOTU3489	0	0	0	0	0	0	0	1.73e-05	3.8e-05	0	0	0	0	0	0	0	0	0	0	0	0	0	0	0	0	0	0	0	0	0	0	0	0	6.45e-05	0	0	0	1.84e-05	0.00029925	0.000842236	0.000940849	3.75e-05	0.000533191	0.000242076	8.71e-05	0.000548024	0	0.000513837	0.000278291
ZOTU3023	0	0	0	0	0	0	0	0	0	0	0	0	0	0	0	0	0	0	0	0	0	0	0	0	0	0	0	0	0	0	0	0	0	0	0	0	0	0	0	0	0	0	0	0	0	0.00426505	0	0	0
ZOTU4905	0	0	0	0	0	0	6.55e-05	8.63e-05	0.000152175	0	0	0	0	0	0	0	0	0	0	0	0	0	0	0	0	0	0	1.91e-05	0	0.000108284	2.33e-05	0.000270079	0	0	0	0.000197429	0	0.000202672	0.000529442	0.00128552	0.00075677	0.0002623	7.62e-05	0.000998563	0	0	0	0.000403729	0
ZOTU1820	0.000506113	0.00023013	0	0	3.19e-05	0.000612813	4.37e-05	0	0	0	0	0	0	0	0	0	0.000355583	5.15e-05	0	0	0	0	0	0	0	0	0	0.000267451	0.000992698	0.00059556	0.000303278	0.000101279	0.000277178	0.000193644	0.000845612	1.97e-05	0	0	0	0	0	0	0	0	0	0	0	0	0
ZOTU13164	1.33e-05	4.18e-05	0	0	0.000430347	0.000543175	0.000393219	0.00024165	7.61e-05	3.28e-05	8.39e-05	0	0	0	0	0	8.47e-05	0.000223329	6.59e-05	0	0	0	1.64e-05	0	0	0	0	0.000171933	0.000386984	0.000469229	0.00048991	0.000270079	0.000118791	0.000796093	0.000190263	0.000256658	0	1.84e-05	0	0	0	0	0	0	0	0	0	0	0
ZOTU7185	0	0	0	0	0	0	0	0	0	0	0	0	0	0	0	0	0	0	0	0	0	0	0	0	0	0	0	0	0	0	0	0	0	0	0	0	0	0	2.3e-05	0	0.000552238	0.000355979	5.71e-05	0.000151297	0.000748712	0	0	0.00284445	0.00067585
ZOTU10386	0	6.28e-05	0	0	0.000541919	0.000473538	0.000611674	8.63e-05	1.9e-05	0	0	0	0	0	0	0	8.47e-05	0.000103075	0	0	0	0	0	0	0	0	0	7.64e-05	0.000302857	0.000324851	0.000396594	6.75e-05	0.000197985	0.00124793	0.000147982	7.9e-05	0.000559862	0	0	0	2.05e-05	0	0	0	0	0	0	0	0
ZOTU5266	0	0	0	0	6.38e-05	0.000181058	0.000152919	0.000897558	0.000817941	0	0	0	0	0	0	0	0	0	0	0	0	0	0	0	0	0	0	0	1.68e-05	5.41e-05	0.000583226	0.000675197	1.98e-05	0	0.000126842	0.000414602	0	0	0.00133511	2.22e-05	0	0	0	0	0	0	0	0	0
ZOTU4546	0.000133188	8.37e-05	0	0	0.000637552	0.00045961	0.000349528	0.000172607	3.8e-05	0.000114807	0	0	0	0	0	0	1.69e-05	0.000429479	2.2e-05	0	0	1.69e-05	0	0	0	0	0	0.000496695	3.37e-05	5.41e-05	0	0	0	0.000344256	0.000126842	0	0.00129199	0.000515891	2.3e-05	0	0	0	0	0	0	0	0	0	0
ZOTU2293	0.000519432	0.000104605	5.35e-05	0	0.000143449	0.000125348	2.18e-05	0	0	0.000229614	9.78e-05	0	0	0	0	0	0.000965153	0.00020615	0	0	0	0	0	0	0	0	0	0.000133726	0.000572063	0.000288757	2.33e-05	6.75e-05	0.00051476	0.000172128	0.00069763	0	0.00040913	0	0	0	0	0	0	0	0	0	0	0	0
ZOTU2099	0	0	0	0	0.00207204	0.000278552	2.18e-05	0	0	0	0.000265575	0	0	0	0	0	1.69e-05	0.000103075	0	0	0	0	0	0	0	0	0	0.000916976	0.000521587	0.000487277	0	3.38e-05	0.00025738	0.000258192	0.000105702	0	0	0	0	0	0	0	0	0	0	0	0	0	0
ZOTU11580	0	2.09e-05	0	0	0.000111572	0.000501393	0.000458756	0.000276172	0.000133153	0	0	0	0	0	0	0	0	3.44e-05	2.2e-05	0	0	0	0	0	0	0	0	5.73e-05	0.000403809	0.00019852	0.000373265	0.000270079	0	0.000796093	0.000211403	0.000631774	0.000215332	0.000184247	0.000161134	0.000199477	2.05e-05	0	0	0	0	0	0	5.51e-05	0
ZOTU10085	0	0	0	0	0.00218361	0.000208914	0	0	0	0	0	0	0	0	0	0	0	0	0	0	0	0	0	0	0	0	0	0.000974286	0.000959047	0.000577513	0	0	0.000376171	0	4.23e-05	0	0	0	0	0	0	0	0	0	0	0	0	0	0
ZOTU8957	0	0	0	0	0	2.79e-05	2.18e-05	8.63e-05	0.000171197	0	0	0	0	0	0	0	0	0	0	0	0	0	0	0	0	0	0	0	0	9.02e-05	2.33e-05	0.000135039	0	0	0	1.97e-05	0	3.68e-05	0.000253211	2.22e-05	0.000490878	0.00039345	0.00114255	0.000347984	1.74e-05	4.77e-05	0.00218223	0.00110108	3.98e-05
ZOTU5010	0	0	0	0	1.59e-05	0.000139276	0.000480601	0.000327954	0.000133153	0	0	0	0	0	0	0	0	3.44e-05	0.000131874	0	0	0	0	0	0	0	0	0	0	5.41e-05	0.000909833	0.000573917	0	0	0.000274824	0.00102663	0.000559862	0.000423768	9.21e-05	0	6.14e-05	5.62e-05	0	1.51e-05	0	0	0	0	0
ZOTU4831	0.00195786	0.000292893	0	0.00105956	0	0	0	0	0	3.28e-05	0.000125798	0	0	0	0	0	0.00116834	0.000395121	0	0	0	0.000117988	3.27e-05	0	0	0	0	0	0	0	0	0	3.96e-05	0	8.46e-05	0	0	0	0	0	0	0	0	0	0	0	0	0	0
ZOTU6034	0	0	0	0	0	0	0	3.45e-05	0.000152175	0	0	0	0	0	0	0	0	0	0	0	0	0	0	0	0	0	0	0	0	0	4.67e-05	6.75e-05	0	0	0	0.000118458	0	0	0.000138115	0.000332462	0.000654504	0.000955521	0.00154245	0.000862395	0.00153225	4.77e-05	0	0.00027527	0.00067585
ZOTU5303	4e-05	0	0	0	0.00113165	0.000376045	0.000415065	0.000103564	0	0	0	0	0	0	0	0	0.000101595	3.44e-05	0	0	0	3.37e-05	0	0	0	0	0	0.000305659	0.000336508	0.000288757	0.00025662	3.38e-05	0.000415767	0.000387288	0.000634209	3.95e-05	0.000366064	0	0	0	0	0	0	0	0	0	0	0	0
ZOTU4876	0	0	0	0	0	0	0	0	3.8e-05	0	0	0	0	0	0	0	0	0	0	0	0	0	0	0	0	0	0	0	0	0	0	0	0	0	0	0	0	0	0	0	2.05e-05	0	7.62e-05	0.00134655	0	0.00328814	0	0.000183513	0.000417437
ZOTU12113	0	0	0	0	0	9.75e-05	0.00019661	0.000500561	0.000989138	0	0	0	0	0	0	0	0	0	0	0	0	0	0	0	0	0	0	0	3.37e-05	0.000234615	0.000209962	0.000675197	0	0	0	0.000473831	0	0.00103178	0.000253211	0.000465446	8.18e-05	0.00013115	0.000209468	0.00107421	0.000139295	7.15e-05	0	0.000513837	1.99e-05
ZOTU9305	1.33e-05	0	0	0	0.000605674	0.000125348	2.18e-05	0	0	0	0	0	0	0	0	0	0	1.72e-05	0	0	0	0	0	0	0	0	0	0.00200588	0.000942222	0.00079408	2.33e-05	0	0.000376171	0.000301224	4.23e-05	0	0	0	0	0	0	0	0	0	0	0	0	0	0
ZOTU3146	5.33e-05	0	0	0	0.00039847	0.00091922	0.00019661	0.000276172	0.000171197	0	0	0	0	0	0	0	0	0.000292046	0	0	0	0	0	0	0	0	0	1.91e-05	0.000353333	0.000270709	0.000163303	0.000371358	7.92e-05	0.000236676	0.000549648	0.000296144	0.000301464	0.000294795	0	2.22e-05	0	0	0	0	0	0	0	0	0
ZOTU3241	0	2.09e-05	0	0	0.000302837	0.000738162	0.000983048	0.000517822	0	0	0	0	0	0	0	0	1.69e-05	0	0	0	0	0	0	0	0	0	0	7.64e-05	0.000269206	0.000252662	0.000303278	0.000236319	0.000118791	0.000623965	0.000443946	0.000118458	0.000236865	0	0	0	0	0	0	0	0	0	0	0	0
ZOTU10927	0	0	0	0	0.000366592	0.000139276	0	1.73e-05	0	0	0	0	0	0	0	0	0	0	0	0	0	1.69e-05	0	0	0	0	0	0.00185305	0.00114413	0.000415088	0	0	0.0012671	0	0	0	0	0	0	0	0	0	0	1.51e-05	0	0	0	1.84e-05	0
ZOTU9889	0	0	0	0	0	0	0.000109228	0.00024165	3.8e-05	0	0	0	0	0	0	0	0	0.000257688	0.00362653	0.000213053	0	0	0	0	3.36e-05	0	0	0	0	5.41e-05	7e-05	6.75e-05	0	0	0	9.87e-05	0.000129199	0.00031322	0	0	0	0	0	0	0	0	0	0	0
ZOTU12879	0	0	0	0	0.00012751	0.000877437	0.000611674	0.000276172	0	0	0	0	0	0	0	0	1.69e-05	0	0	0	0	0	0	0	0	0	0	1.91e-05	0.000420635	0.000685797	0.000676543	0.000168799	3.96e-05	0.00116186	8.46e-05	1.97e-05	6.46e-05	0	0	0	0	0	0	0	0	0	0	0	0
ZOTU12984	0	0.000481182	0	0	6.38e-05	0.000529248	0.000917511	0.000276172	0.000266307	0	0	0	0	0	0	0	0	1.72e-05	0.000109895	0	0	0	0	0	0	0	0	1.91e-05	0.000286032	0.000523371	0.000373265	0.000135039	1.98e-05	0.000408804	0.000105702	0.000315887	0.000344531	7.37e-05	0.000368307	0.000709251	0.000204532	7.49e-05	0.000399893	0.000166427	1.74e-05	0	0	0.000165162	0
ZOTU13605	0.00261048	0.000585786	0	0	0	0	0	0	0	0	0	0	0	0	0	0	0.00162552	8.59e-05	0	0	0	0.000168554	1.64e-05	3.66e-05	0	0	0	0	0	0	0	0	0.000118791	0	0	0	0	0	0	0	0	0	0	0	0	0	0	0	0
ZOTU1537	0	0	0	0	0	0	0	0	0	0	0	0	0	0	0	0	0	0	0	0	0	0	0	0	0	0	0	0	0	0	0	0	0	0	0	0	0	0	0	0	0	0	0	0	0	0.000953084	0	1.84e-05	0
ZOTU3665	0	0	0	0	1.59e-05	0.000626741	0.000699056	0.000604125	0.000380438	0	0	0	0	0	0	0	0	0	0	0	0	0	0	0	0	0	0	1.91e-05	0.000151428	0.000360946	0.00104981	0.000405118	0	0.000258192	0	0.000355373	2.15e-05	0.000257946	0.000207173	0.000155149	0.000572691	0.000468393	0.000133298	0.000423633	0	0	2.45e-05	9.18e-05	0
ZOTU2316	0	0	0	0	0	0	0	0	0	0	0	0	0	0	0	0	0	0	0	0	0	0	0	0	0	0	0	0	0	0	0	0	0	0	0	0	0	0	0	0	0	0	0	0	5.22e-05	0.00252567	0	0	0
ZOTU5350	0	0	0	0	0	0	0	0	0	0	0	0	0	0	0	0	0	0	0	0	0	0	0	0	0	0	0	0	0	0	0	0	0	0	0	0	0	0	0	0	0	0	0	0	0	0.0011437	0.00134857	0	0
ZOTU4914	0	2.09e-05	0	0	0.000191266	0.0004039	0.00141996	0.000276172	0.000171197	0	0	0	0	0	0	0	0	6.87e-05	2.2e-05	0	0	0	0	0	0	0	0	5.73e-05	0.000201905	0.000162426	0.000419923	0.000202559	0.000158388	0	0.000338245	0.000157944	0.000667528	0.000221096	2.3e-05	0	4.09e-05	0	0	0	0	0	0	0	0
ZOTU3091	2.66e-05	2.09e-05	0	0	9.56e-05	0.000598886	0.00183502	0.000604125	7.61e-05	0	0	0	0	0	0	0	1.69e-05	0.000171792	0	0	0	0	0	0	0	0	0	0	0	0.000126331	0.000653214	0.000337598	0	0	0.000105702	9.87e-05	2.15e-05	0.000147398	0.000138115	0.000110821	0	3.75e-05	0	0	0	0	0	0	0
ZOTU12312	1.33e-05	6.28e-05	0	0	0.000701307	9.75e-05	0.000109228	5.18e-05	1.9e-05	4.92e-05	0	0	0	0	0	0	6.77e-05	5.15e-05	0.000131874	0	0	0	0	0	0	0	0	0.000515799	0.000370158	0.00019852	2.33e-05	3.38e-05	0.000237581	0.000946705	0.000359385	1.97e-05	0.000322997	0.000608015	0.000161134	0	6.14e-05	0	0	0	0	0	0	0	0
ZOTU1309	0	0	0	0	0	0	0	0	0	0	0	0	0	0	0	0	0	0	0	0	0	0	0	0	0	0	0	0	0	0	0	0	0	0	0	0	0	0	0	0	0	0	0	0.002799	0.0013233	0	0	0.00299126	0
ZOTU4063	0	0	0	0	0	4.18e-05	0.000283992	0.000396997	0.00030435	0	0	0	0	0	0	0	0	0	0	0	0	0	0	0	0	0	0	3.82e-05	1.68e-05	0.000144378	0.000116645	0.000236319	0	0	0	0.000177687	0	0	9.21e-05	0.000465446	0.000163626	0	0	0.000847265	3.48e-05	0.00190617	0	0.000110108	0
ZOTU3186	0	0.00043934	0.000267315	0	0	0	0	0	5.71e-05	0	0	0	0	0	0	0	0	0	2.2e-05	0	0	0	0	0	0	0	0	0	0	1.8e-05	0	0	0	0	0	0	0	0	9.21e-05	0.000110821	0	0	0	0	0.00301226	0.000381234	0	0	0.00214682
ZOTU3276	1.33e-05	0.000104605	0	0	0.000159388	0.000654596	0.000371374	0.000189868	0.000114131	1.64e-05	0	0	0	0	0	0	0	0.000137433	2.2e-05	0	0	0	0	0	0	0	0	1.91e-05	0.000286032	0.000252662	0.000116645	0.000135039	3.96e-05	0	0.000211403	0.000375116	0.00107666	0.00086596	0	2.22e-05	0	0	0	0	0	0	0	0	0
ZOTU8035	0	0	0	0	0	0	0	0.000552343	0.00150273	0	0	0	0	0	0	0	0	0	0	0	0	0	0	0	0	0	0	0	0	0.000234615	0	6.75e-05	0	0	0	0.000118458	0	0	0.00149625	0.00197261	0.000327252	0.000281036	0	0.000453892	0	0	0	0	0
ZOTU9313	0.000279694	0.000251051	0	0.000228214	0.000382531	0.000236769	2.18e-05	6.9e-05	0.000133153	0.000311618	9.78e-05	0	0	0	0	0	0.000372515	0.000223329	0	0	0	1.69e-05	0	0	0	0	0	0.000439384	0.000269206	0.000216567	2.33e-05	0.000101279	0.000395969	0.00010758	0.000169122	0.000315887	6.46e-05	0.000257946	0.000115096	4.43e-05	0	1.87e-05	0	0	0	0	0	0	0
ZOTU6360	1.33e-05	0	0	0	9.56e-05	5.57e-05	2.18e-05	0	0	6.56e-05	0	0	0	0	0	0	0	0.000171792	0.000307706	0	0	0	0	0	0	0	0	0.000878768	0.000891745	0.00205739	7e-05	3.38e-05	0.000356372	0	0.000126842	0	0	0	0	0	0	0	0	0	0	0	0	0	0
ZOTU9927	1.33e-05	2.09e-05	0	0	0.000541919	0.000807799	0	3.45e-05	0	0	0	0	0	0	0	0	3.39e-05	1.72e-05	0	0	0	0	1.64e-05	0	0	0	0	0.000267451	0.000471111	0.000306804	2.33e-05	0	0.000178186	0.00182886	0.000570788	0	0	0	0	0	0	0	0	0	0	0	0	0	0
ZOTU6893	0.00245065	0.000564865	0	0	0	0	0	0	0	0	0	0	0	0	0	0	0.00182871	0.000274867	0	0	0	0	0	0	0	0	0	0	0	0	0	0	0	0	0	0	0	0	0	0	0	0	0	0	0	0	0	0	0
ZOTU4465	0	0	0	0	9.56e-05	0.000376045	0.000655365	0.000604125	0.000380438	0	0	0	0	0	0	0	0	0	0	0	0	0	0	0	0	0	0	0	0.000319682	0.000216567	0.000909833	0.000641437	0	0.000473352	0.000232543	0.000691003	0.000495263	0.00031322	2.3e-05	0.000221641	0	0.000168621	3.81e-05	4.54e-05	0	0	0	0	0
ZOTU2938	0	0	0	0	3.19e-05	0.000139276	0.000131073	0.000586865	0.000209241	0	0	0	0	0	0	0	1.69e-05	0	0	0	0	0	0	0	0	0	0	7.64e-05	0.000420635	0.000415088	0.000676543	0.000506397	5.94e-05	0	0.000317105	0.000631774	0.000538329	0.000350069	0	0	0	0	0	0	0	0	0	0	0
ZOTU1666	0	0	0	0	0	0	0	0	0	0	0	0	0	0	0	0	0	0	0	0	0	0.00473638	0.000359983	0	0	0	0	0	0	0	0	0	0	0	0	0	0	0	0	0	0	0	0	0	0	0	0	0	0
ZOTU7458	0	0	0	0	0	0	0	0	0	0	0	0	0	0	0	0	0	0	0	0	0	0	0	0	0	0	0	0	0	0	0	0	0	0	0	0	0	0	0	0	0	0	0	1.51e-05	0	0.000833949	2.45e-05	0	0
ZOTU10859	0.00054607	0.000271972	0	0	0.000159388	9.75e-05	0	0	0	4.92e-05	0	0	0	0	0	0	0.0021335	0.000309225	0	0	0	0.000202265	3.27e-05	0	0	0	0	0.000152829	0.000117778	9.02e-05	4.67e-05	3.38e-05	0.000534558	0	0.000317105	0	0	0	0	0	0	0	0	0	0	0	0	0	0
ZOTU7730	0	0	0	0	1.59e-05	0	0	0	1.9e-05	0	0	0	0	0	0	0	0	0	0	0	0	0	0	0	0	0	0	0	0	0	0	0	0	0	0	0	0	0	0.000138115	2.22e-05	0.000327252	0.00013115	0.000209468	0.000605189	0.00156707	2.38e-05	0	0.00119284	0.000159024
ZOTU7156	0	0	0	0	0	0	0	0	0	0	0	0	0	0	0	0	0	0	0	0	0	0.000859628	0.00183264	0.00182869	0.00057093	0	0	0	0	0	0	0	0	0	0	0	0	0	0	0	0	0	0	0	0	0	0	0	0
ZOTU11949	0	0	0	0	0	0.000250696	0.000327683	0.000673168	0.000437504	0	0	0	0	0	0	0	0	0	0	0	0	0	0	0	0	0	0	1.91e-05	0	0.00019852	0.000466581	0.000438878	0	4.3e-05	0.000105702	0.000592288	0.00208872	0.00101336	9.21e-05	0	0	0	0	1.51e-05	0	2.38e-05	0	0	0
ZOTU2251	1.33e-05	0.000125526	0.00318105	0.00115737	0	0	0	0	0	0.000180411	2.8e-05	0.000379945	0	0	0	0	0	0	2.2e-05	0	0	0	0	0	0	0	0	0	0	0	0	0	0	0	0	0	0	0	0	0	0	0	0	0	0	0	0	0	0
ZOTU11938	0	0	0	0	0	5.57e-05	0.000131073	0.000310693	0.000665766	0	0	0	0	0	0	0	0	0	0	0	0	0	0	0	0	0	0	0	0	5.41e-05	9.33e-05	0.000303838	0	0	0	0.000454088	0	0	0.000713595	0.000155149	0.000306799	0.000149886	0.00022851	0.000665708	0.000417885	0.000810122	0	0.000807458	9.94e-05
ZOTU1864	0	6.28e-05	0	0	0	0	0	0	0	0	0	0	0	0	0	0	0	0	2.2e-05	0.00170442	0.00328845	0	0	0	0	0	0	0	0	0	0	0	0	0	0	0	0	0	0	0	0	0	0	0	0	0	0	0	0
ZOTU10383	7.99e-05	0.00023013	0	0	0	0.000292479	0.000524292	0.000379736	0.000456525	0	0	0	0	0	0	0	0	6.87e-05	2.2e-05	0	0	1.69e-05	0	0	0	0	0	3.82e-05	8.41e-05	7.22e-05	0.000396594	0	0	0.00032274	0.000190263	0.000276401	0.000258398	0.00128973	4.6e-05	2.22e-05	0	0	0	0	0	0	0	0	0
ZOTU7502	0	0	0	0	0	0.000362117	0.000174764	0.000189868	9.51e-05	0	0	0	0	0	0	0	0	3.44e-05	2.2e-05	0	0	0	0	0	0	0	0	0	1.68e-05	0.000162426	0.00048991	0.000675197	0	0	0.000232543	0.000789718	0.00152885	0.00189774	0	0	0	0	0	0	0	0	0	0	0
ZOTU2599	0	0	0	0	0.000462225	2.79e-05	0	5.18e-05	0	0	0	0	0	0	0	0	0	0	0	0	0	0	0	0	0	0	0	0.00225423	0.000286032	0.000216567	0	0	0.00172247	0	2.11e-05	0	0	0	0	0	0	0	0	0	0	0	0	0	0
ZOTU5548	0.000932314	0.000983284	5.35e-05	0	0	0	0	0	0	9.84e-05	5.59e-05	0	0	0	0	0	0.00033865	1.72e-05	0	0	0	0.000455097	0.00157084	0.000310877	0	0	0	9.55e-05	0	9.02e-05	0	0	3.96e-05	0	0	0	0	0	0	0	0	0	0	0	0	0	0	0	0
ZOTU14268	0	0	0	0	0.00114759	0.000250696	0	0	0	1.64e-05	0	0	0	0	0	0	0	0.000103075	0	0	0	0	0	0	0	0	0	0.00254079	0.000588889	0.000234615	0	0	0.000158388	0	0	0	0	0	0	0	0	0	0	0	0	0	0	0	0
ZOTU1852	0.000199782	0.000167368	0	0	0.000446286	0.000236769	0.000131073	5.18e-05	7.61e-05	0.00016401	0.00034944	0	0	0	0	0	5.08e-05	0.000257688	4.4e-05	0	0	0	0	0	0	0	0	0.00021014	6.73e-05	0.00019852	0.000209962	0.000101279	0.000237581	0.00021516	8.46e-05	0.000138201	0	0.000239521	0.000184154	0.000155149	0.000102266	0.0002623	0.000247553	0.000166427	0	0	0	3.67e-05	0
ZOTU8291	1.33e-05	8.37e-05	0	0	3.19e-05	0.000139276	0.000218455	0.000586865	0.000323372	0	0	0	0	0	0	0	0	1.72e-05	0.000703328	0	1.83e-05	1.69e-05	0	0	0	0	0	0	0.000168254	0.000234615	0.000723201	0.000708956	3.96e-05	0	2.11e-05	7.9e-05	0.000322997	9.21e-05	0.000161134	0.000243805	4.09e-05	1.87e-05	0	1.51e-05	0	0	0	0	0
ZOTU2148	6.66e-05	2.09e-05	0	0	7.97e-05	0.000236769	0.000393219	0.000172607	1.9e-05	6.56e-05	0.000237619	0	0	0	0	0	0.000118528	6.87e-05	0.000109895	0	0	0.000134844	4.91e-05	0	0	0	0	0	0	1.8e-05	4.67e-05	0	1.98e-05	0.000602449	0.000253684	3.95e-05	0.00159345	0.000644864	0	2.22e-05	0	0	0	0	0	0	0	0	0
ZOTU1861	0.00010655	0.0032009	0	0	0	0	0	0	0	0.000787247	0.000670925	0	0	0	0	0	0	0	0.000241769	0	0	0	0	0	0	0	0	0	0	0	0	0	0	0	0	0	0	0	0	0	0	0	0	0	0	0	0	0	0
ZOTU3813	0	0	0	0	0	4.18e-05	8.74e-05	0.000310693	0.000608701	0	0	0	0	0	0	0	0	0	0	0	0	0	0	0	0	0	0	0	1.68e-05	0.000126331	0.000606555	0.000540157	0	0	2.11e-05	0.000592288	0	0.000534316	0.000805672	0.000443282	0.000245439	0.000187357	0.000437978	0.000620319	0.000226355	0	0	0.000201864	0
ZOTU4979	0	0	0	0	0	2.79e-05	2.18e-05	0.000379736	0.00039946	0	0	0	0	0	0	0	0	1.72e-05	0	0	0	0	0	0	0	0	0	1.91e-05	0	1.8e-05	0.00025662	0.000303838	0	0	6.34e-05	0.000454088	0.000452196	0.000423768	0.000161134	0.000531938	0.000388612	0.000711957	0.000285638	3.03e-05	0	0	0	3.67e-05	0
ZOTU14211	0.00010655	0.000125526	0	0	0.000159388	0.000167131	0.000262146	0.000569604	0.000133153	1.64e-05	0	0	0	0	0	0	1.69e-05	0.000137433	0.000989054	0.000369292	0	5.06e-05	0	0	0	0	0	5.73e-05	1.68e-05	0.000252662	0.000139974	0.000337598	1.98e-05	0	0.000211403	0.000197429	0	0.000257946	0.000207173	0.000110821	2.05e-05	3.75e-05	0	0	0	0	0	0	0
ZOTU12629	0	0	0	0	0	0	0	0	0	0	0	0	0	0	0	0	0	0	0	0	0	0.000286543	0.00179992	0.00135323	0.000503761	0.000581614	0.000443692	0	0	0	0	0	0	0	0	0	0	0	0	0	0	0	0	0	0	0	0	0	0
ZOTU4568	0	0	0	0	0.000255021	6.96e-05	0	0	0	0	0	0	0	0	0	0	0	0	0	0	0	0	0	0	0	0	0	0.00168112	0.00021873	0.000108284	0	0	0.0025738	0	4.23e-05	0	0	0	0	0	0	0	0	0	0	0	0	0	0
ZOTU7020	0	0.000104605	0	0	4.78e-05	0.000139276	0	1.73e-05	7.61e-05	0	0	0	0	0	0	0	0	0.000257688	0.000351664	0	0	0	0	0	0	0	0	0.000764146	0.000353333	0.000559466	0.00025662	3.38e-05	3.96e-05	0	6.34e-05	1.97e-05	0	0	0.000621518	0.00121903	0	0	0	0	0	0	0	0	0
ZOTU1480	0.00384913	0.00104605	2.67e-05	0	0	0	0	0	0	0	0	0	0	0	0	0	0	0	0	0	0	0	0	0	0	0	0	0	0	0	0	0	0	0	0	0	0	0	0	0	0	0	0	0	0	0	0	0	0
ZOTU11705	0	0	0	0	0	2.79e-05	4.37e-05	0.000103564	0.000152175	0	0	0	0	0	0	0	0	0	0	0	0	0	0	0	0	0	0	0	0	5.41e-05	4.67e-05	0.000101279	0	0	0	5.92e-05	0	0.000239521	0.000690576	0.000199477	0.00114538	0.00103046	0.00194234	9.08e-05	0	0.000119136	0	0.000293621	0.000218657
ZOTU13411	0	0	0	0	0	5.57e-05	0	0.000120825	0.000323372	0	0	0	0	0	0	0	0	0	0	0	0	0	0	0	0	0	0	0	0	0.000126331	0.000116645	3.38e-05	0	0	0	0.000177687	0.000495263	5.53e-05	6.91e-05	4.43e-05	2.05e-05	5.62e-05	3.81e-05	0.000272335	0	0.000619505	0.00117693	0.000678999	0
ZOTU12397	0	0.000334735	0	0	0	1.39e-05	0	0.000103564	0.000209241	0	0	0	0	0	0	0	0	0	2.2e-05	0	0	0.000522519	6.55e-05	0	0	0	0	0	0	7.22e-05	2.33e-05	0.000101279	0	0	0	1.97e-05	0	1.84e-05	0.000690576	0.00104171	0.000429518	0.000412186	0.000761702	0.000166427	0.000748712	0.000214444	0	1.84e-05	9.94e-05
ZOTU2493	0	0	0	0	0	0	2.18e-05	0	1.9e-05	0	0	0	0	0	0	0	0	0	0	0	0	0	0	0	0	0	0	0	0	0	4.67e-05	6.75e-05	0	0	0	1.97e-05	0	0	2.3e-05	0	0	0.000299771	0	0.000226946	0.000156707	0	0.00122597	0.000165162	0.000198779
ZOTU1703	0	0	0	0	0	0	0	0	0	3.28e-05	0	0.00486013	0	0	0	0	0	0	0	0	0	0	0	0	0	0	0	0	0	0	0	0	0	0	0	0	0	0	0	0	0	0	0	0	0	0	0	0	0
ZOTU13444	0.00125197	0.000502103	0.000187121	0	3.19e-05	0	2.18e-05	0	0	0	0	0	0	0	0	0	0.00165939	0.000240509	0	0	0	0.00037082	0.000196354	0	0	0	0	7.64e-05	0.000117778	0.000162426	2.33e-05	0	3.96e-05	0	0	0	0	0	0	0	0	0	0	0	0	0	0	0	0
ZOTU12830	0	0	0	0	0.000143449	0.000222841	0.000415065	0.000448779	0.000152175	0	0	0	0	0	0	0	0	0	0	0	0	0	0	0	0	0	0	0.000133726	0.000353333	0.000216567	0.000653214	0.000641437	7.92e-05	0.00010758	0.000232543	3.95e-05	0.000645995	0.000331644	0	2.22e-05	0	0	0	0	3.48e-05	0	0	0	0
ZOTU3823	0	0.00023013	0.000160389	0	0	0	0	0	0	0	0	0	0	0	0	0	0	0	0	0	0	0	0	0	0	0	0	0	0	5.41e-05	0	0	0	0	0	0	0	0	0.000138115	0	0.000634051	0.00172369	0.0034467	0	0	0	0	0	0
ZOTU3203	9.32e-05	2.09e-05	0	0	0.000350653	0.000181058	0	3.45e-05	1.9e-05	0.00016401	4.19e-05	0.00150395	0	0	0	0	0.000220123	0.000188971	0	0	0	0	0	0	0	0	0	0.00021014	0	1.8e-05	0	3.38e-05	0.000158388	0	0.000126842	0.00053306	0	0.000644864	0.000161134	0	0	3.75e-05	0	0.000121038	0	0	0	0	0
ZOTU1927	1.33e-05	0	0	0	0.000462225	4.18e-05	0	0	0	8.2e-05	0	0	0	0	0	0	1.69e-05	0	0	0	0	5.06e-05	3.27e-05	0	0	0	0	0.00141367	0.000235555	0.000216567	0	0	0.00229662	0	0	0	0	0	0	0	0	0	0	0	0	0	0	0	0
ZOTU4850	0	0	5.35e-05	0	0	0	0	0	0	0	0	0	0	0	0	0	0	0	0	0	0	0.000303398	0.00355074	0.000749762	0.000201505	0	0	0	0	0	0	0	0	0	0	0	0	0	0	0	0	0	0	0	0	0	0	0	0
ZOTU14659	5.33e-05	0	0	0	0.000334715	1.39e-05	0	0	0	3.28e-05	0	0	0	0	0	0	1.69e-05	0.000103075	0	0	0	0	1.64e-05	0	0	0	0	0.00133726	0.000790793	0.000415088	0	0	0.00174226	0	0	0	0	0	0	0	0	0	0	0	0	0	0	0	0
ZOTU11465	0.00182467	0.000481182	0	0	0	0	0	0	0	0.000147609	5.59e-05	0	0	0	0	0	0.000118528	0.00218176	0	0	0	1.69e-05	0	0	0	0	0	0	0	0	0	0	0	0	0	0	0	0	2.3e-05	0	0	0	0	0	0	0	0	0	0
ZOTU11118	6.66e-05	0	0	0	0.000430347	0.000306407	0.000327683	6.9e-05	0	0	0	0	0	0	0	0	0.000152393	6.87e-05	0	0	0	0.000134844	3.27e-05	0	0	0	0	0.000191037	0.000454285	0.000505324	0.000396594	6.75e-05	0.000178186	0.000516384	0.000232543	5.92e-05	0.000538329	9.21e-05	0	0	2.05e-05	0	0	0	0	0	0	0	0
ZOTU12064	0	6.28e-05	0	0	1.59e-05	0.000208914	0.000851975	0.000500561	0.00030435	0	0	0	0	0	0	0	0	0	4.4e-05	0.000142035	5.48e-05	1.69e-05	3.27e-05	0	0	0	0	1.91e-05	1.68e-05	0.000378993	0.000629885	0.000202559	1.98e-05	0	0.000169122	0.000118458	0.000602929	0	0	0	0	5.62e-05	0	0.000105908	0	0	0	0.000256918	0
ZOTU2588	1.33e-05	0.000146447	0	0	0.000255021	9.75e-05	0	3.45e-05	0.000133153	0	1.4e-05	0	0	0	0	0	1.69e-05	6.87e-05	0	0	0	0	0	0	0	0	0	0.00181485	0.000386984	0.000342898	0	0	0.00134629	0	4.23e-05	5.92e-05	0	0	4.6e-05	0	0	0	0	0	0	0	0	0	0
ZOTU10432	0	0	0	0	0.00012751	1.39e-05	0	0	0	0	0	0	0	0	0	0	0	0	0	0	0	0	0	0	0	0	0	0.000439384	0.000403809	0.000415088	0	0	0.00324695	0	0.000169122	0	0	0	0	0	0	0	0	0	0	0	0	0	0
ZOTU5079	0	0	0	0	0	0	0	0.000103564	0.000437504	0	0	0	0	0	0	0	0	0	0	0	0	0	0	0	0	0	0	0	0	0.000108284	2.33e-05	0.000135039	0	0	0	9.87e-05	0	0	0.00057548	0.00048761	0.000531784	0.000618279	0.000495106	0.000332854	0.000696476	0	0	0.000128459	0.0015306
ZOTU8742	7.99e-05	2.09e-05	0	0	0.000844756	0.000222841	2.18e-05	0	0	3.28e-05	0	0	0	0	0	0	5.08e-05	0.000292046	0	0	0	0	3.27e-05	0	0	0	0	0.000821457	0.000235555	0.000324851	0	0	0.00152448	0	0.000295964	0	0	0	0	0	0	0	0	0	0	0	0	0	0
ZOTU7267	0.00229083	0.000543944	0.000133658	0	1.59e-05	0	0	0	0	0.000459227	0.000181709	0	0	0	0	0	3.39e-05	0	0	0	0	0.000303398	0.000834506	0	0	0	0	0	0	0	0	0	0	0	0	0	0	0	0	0	0	0	0	0	0	0	0	0	0
ZOTU3567	0	0	0	0	0.000669429	0.000961003	0.000742747	0.000120825	0	0	0	0	0	0	0	0	0	0	0	0	0	0	0	0	0	0	0	0.000267451	0.00117778	0.00137159	0.000466581	6.75e-05	0.000296977	0	4.23e-05	0.000118458	0	0	0	0	0	0	0	0	0	0	0	0	0
ZOTU13381	0	0.000209209	0	0	9.56e-05	0.000376045	0.00102674	0.000811254	0.000475547	3.28e-05	0	0	0	0	0	0	0	0.000326404	0.000153853	0	0	0	0	0	0	0	0	1.91e-05	0.000269206	0.000306804	0.000443252	0.000607677	1.98e-05	0.000473352	0.000105702	0.000513317	0	0	0	0	0	0	0	0	0	0	0	0	0
ZOTU4061	0	0	0.00261969	0.00215173	0	0	0	0	0	0	0	0	0	0	0	0	0	0	0	0	0	0	0	0	0	0	0	0	0	0	0	0	0	0	0	0	0	0	0	0	0	0	0	0	0	0	0	0	0
ZOTU6106	0	0	0	0	0.00221549	0.000208914	0	0	0	0	0	0	0	0	0	0	0	0	0	0	0	0	0	0	0	0	0	0.000515799	0.000605714	0.000126331	0	0	0.000930527	0	0.000147982	0	0	0	0	0	0	0	0	0	1.74e-05	0	0	0	0
ZOTU4720	0.000293013	2.09e-05	0	0	0.000414409	8.36e-05	2.18e-05	0	0	1.64e-05	0	0	0	0	0	0	0.000897423	0.000223329	0	0	0	1.69e-05	3.27e-05	0	0.000436593	0	0	5.73e-05	0.000235555	0.000541419	0.000116645	0	0.000158388	0.000989737	0.000211403	0	0	0	0	0	0	0	0	0	0	0	0	0	0
ZOTU11798	0	0	0	0	0.000589735	0.000278552	0.000349528	0.000103564	0.000361416	0	0	0	0	0	0	0	0	0	0	0	0	0	0	0	0	0	0	7.64e-05	0.000286032	0.000270709	0.000279949	0.000202559	0	0.000279708	0	0.000177687	0.000667528	9.21e-05	0.000391326	0.000310297	0.000102266	0.000281036	0.000590319	0.000317724	0	0	0	0.000165162	0
ZOTU6012	0	0	0	0	0	0	0	0	0	0	0	0	0	0	0	0	0	0	0	0	0	0	1.64e-05	0.000201156	0.00218297	0.00106059	0.00129074	0	0	0	0	0	0	0	0	0	0	0	0	0	0	0	0	0	0	0	0	0	0
ZOTU9564	0	0	0	0	0.00039847	0.00114206	0	1.73e-05	0	0	0	0	0	0	0	0	0	0.000240509	0	0	0	0	0	0	0	0	0	0.000171933	0.00107683	0.000270709	0	0	0.000435566	0	0.000951314	0	0	0	0	4.43e-05	0	0	0	0	0	0	0	0	0
ZOTU4431	0	0	0	0	9.56e-05	0.000222841	0.000480601	0.000362475	3.8e-05	1.64e-05	2.8e-05	0	0	0	0	0	1.69e-05	0.000137433	4.4e-05	0	0	1.69e-05	0	0	0	0	0	0.000248348	0.000386984	0.00039704	0.000513239	0.000168799	0.000118791	0.000882157	0.000126842	0.000157944	0.000279931	0	0	0	0	0	0	0	0	0	0	0	0
ZOTU11432	0	2.09e-05	0	0	0.000223143	0.000111421	0	1.73e-05	0	0	0	0	0	0	0	0	3.39e-05	8.59e-05	2.2e-05	0	0	0	0	0	0	0	0	5.73e-05	0.000151428	0.000108284	7e-05	0	0.000534558	0.00266799	0.000634209	0	0	0	0	0	0	0	0	0	0	0	0	0	0
ZOTU7202	0.000399563	4.18e-05	0	0	0	1.39e-05	0	0	0	4.92e-05	0.000111821	0	0	0	0	0	0.000491043	0.000103075	0	0	0	0	0	0	0	0	0	0	1.68e-05	0	0	0	1.98e-05	0.000344256	8.46e-05	0	0.00275625	0.000257946	4.6e-05	0	0	0	0	0	0	0	0	0	0
ZOTU2238	0	0	0	0	0	0	0	0	0	0	0	0	0	0	0	0	0	0	0	0	0	0	0	0	0	0	0	0	0	0	0	0	0	0	0	0	0	0	0	0	0	5.62e-05	0	0.000166427	0.0018979	0.000643332	0	0.000568891	0.0015306
ZOTU3566	1.33e-05	6.28e-05	0	0	0.0010679	0.000835655	0.000371374	5.18e-05	0	0	0	0	0	0	0	0	1.69e-05	0.000120254	2.2e-05	0	0	0	0	0	0	0	0	7.64e-05	6.73e-05	0.000378993	0.000326607	3.38e-05	1.98e-05	0.000344256	0.000507367	0.000157944	0	0.000184247	6.91e-05	0	0	0	0	0	0	0	0	0	0
ZOTU8810	0	0	0	0	0	0	0	3.45e-05	0.000133153	0	0	0	0	0	0	0	0	0	0	0	0	0	0	0	0	0	0	0	0	0	0	3.38e-05	0	0	0	0	0	0	2.3e-05	0.00108604	0.000634051	3.75e-05	0	0.000211816	0.000435297	0	0	0.000128459	0.00196792
ZOTU6028	0	0	0	0	0	0	0	0.000138086	0.00030435	0	0	0	0	0	0	0	0	0	0	0	0	0	0	0	0	0	0	0	0	0.000234615	0	0.000101279	0	0	0	1.97e-05	0	0	0.000782653	0.000199477	0.00081813	0.000412186	0.000914042	0.000741357	0	0	0	5.51e-05	0
ZOTU6388	1.33e-05	0	0	0	0.00105196	8.36e-05	0	0	0	0	0	0	0	0	0	0	0	3.44e-05	0	0	0	0	0	0	0	0	0	0.00116532	0.000723492	0.000469229	0	0	0.00110871	0	6.34e-05	0	0	0	0	0	0	0	0	0	0	0	0	0	0
ZOTU12907	0	0	0	0	0	0.000208914	0.000152919	0.000828515	7.61e-05	0	0	0	0	0	0	0	8.47e-05	1.72e-05	0	0	0	0	0	0	0	0	0	1.91e-05	0.000201905	0.000505324	0.000419923	0.000270079	7.92e-05	0.000989737	0.000126842	5.92e-05	0.000279931	0.000294795	2.3e-05	0	0	7.49e-05	0	0	0	0	0	0	0
ZOTU4508	0	0	0	0	0.000239082	0.000612813	0.000262146	5.18e-05	9.51e-05	0	0	0	0	0	0	0	1.69e-05	0	0	0	0	0	0	0	0	0	0	0.000248348	0.000286032	0.00059556	0.000209962	6.75e-05	1.98e-05	0.000408804	0.00065535	0.000592288	0	0.000350069	0	0	0	0	0	0	0	0	0	0	0
ZOTU3017	0	0	0	0	0	0.000292479	0.000218455	0.00024165	0.000836963	0	0	0	0	0	0	0	0.0006773	6.87e-05	0	0	0	6.74e-05	0	0	0	0	0	0	3.37e-05	1.8e-05	0.000209962	0.000135039	0	0.000623965	8.46e-05	5.92e-05	0	0.000239521	0.000184154	0.000265969	0.000184079	0.0002623	0	0	0	0	0	0	0
ZOTU4924	1.33e-05	6.28e-05	0	0	3.19e-05	0.000153203	6.55e-05	0.000655907	0.000247285	0	0	0	0	0	0	0	0.00027092	0.00108229	0.000109895	0	0	1.69e-05	0	0	0	0	0	1.91e-05	3.37e-05	5.41e-05	0.000279949	0.000438878	0	0	6.34e-05	0.000572545	0.000236865	0.000294795	0	0	0	0	0	0	0	0	0	0	0
ZOTU4158	0	0	0	0	0	0	0	6.9e-05	5.71e-05	0	0	0	0	0	0	0	0	1.72e-05	2.2e-05	9.94e-05	0.000328845	0	0	0	0	0	0	0	0	0	0	3.38e-05	0	0	0	0	0	0	2.3e-05	2.22e-05	0.000143173	9.37e-05	0.000799787	9.08e-05	0.000609416	0	0	0.00042208	0.00186853
ZOTU1773	0	0	0	0	0	0	0	0	0	0	0	0	0	0	0	0	0	0	0	0	0	0.00433185	0.000359983	0	0	0	0	0	0	0	0	0	0	0	0	0	0	0	0	0	0	0	0	0	0	0	0	0	0
ZOTU6985	0	0	0	0	0.000446286	4.18e-05	8.74e-05	0	5.71e-05	4.92e-05	0	0	0	0	0	0	3.39e-05	5.15e-05	0	0	0	0	0	0	0	0	0	0.000515799	0.000117778	7.22e-05	0	0	0.00269259	0	0.000443946	5.92e-05	0	0	2.3e-05	0	0	0	0	0	0	0	0	0	0
ZOTU2433	0	0	0	0	0	0	0	1.73e-05	1.9e-05	0	0	0	0	0	0	0	0	0	4.4e-05	0	0	0	0	0	0	0	0	1.91e-05	0.000151428	3.61e-05	2.33e-05	6.75e-05	1.98e-05	0.00290466	0.00124728	0.000138201	0	0	0	0	0	0	0	0	0	0	0	0	0
ZOTU4753	0	0	0	0	3.19e-05	9.75e-05	0.00043691	0.000362475	0.000513591	0	0	0	0	0	0	0	0	8.59e-05	0	0	0	0	0	0	0	0	0	1.91e-05	3.37e-05	0.000144378	7e-05	0.000337598	0	0	0	0.000276401	4.31e-05	0.000257946	0.000483403	0.000398954	0.000122719	0.000149886	0.00015234	0.000423633	8.71e-05	9.53e-05	0	0.00042208	7.95e-05
ZOTU9217	0	0	0	0	1.59e-05	4.18e-05	0.000262146	0.00046604	0.000342394	0	0	0	0	0	0	0	0	1.72e-05	0	0	0	0	0	0	0	0	0	0	0	5.41e-05	7e-05	0.000270079	1.98e-05	0	0	0.000355373	0	0.000552741	0.00057548	0.000310297	0.000859036	0.000281036	0.000171383	1.51e-05	0	0	0	0	0
ZOTU11487	0.00348952	4.18e-05	0	0	3.19e-05	0	0	0	0	6.56e-05	0	0	0	0	0	0	5.08e-05	0	0	0	0	0.00092705	4.91e-05	0	0	0	0	0	1.68e-05	0	0	0	0	0	0	0	0	0	0	0	0	0	0	0	0	0	0	0	0
ZOTU1772	0	8.37e-05	0	0	0	0	0	1.73e-05	0	0	0	0	0	0	0	0	0	0	4.4e-05	0.00146296	0.00305095	0	0	0	0	0	0	0	0	0	0	0	0	0	0	0	0	0	0	0	0	0	0	0	0	0	0	0	0
ZOTU1667	0	0	0	0	0	0	0	0	0	9.84e-05	0	0.00454351	0	0	0	0	0	0	0	0	0	0	0	0	0	0	0	0	0	0	0	0	0	0	0	0	0	0	0	0	0	0	0	1.51e-05	0	0	0	0	0
ZOTU3511	0	0	0	0	0	6.96e-05	8.74e-05	0.000172607	0.000551635	0	0	0	0	0	0	0	0	0	2.2e-05	0	0	0	0	0	0	0	0	0	1.68e-05	1.8e-05	0.000233291	0.000337598	0	0	2.11e-05	0.000592288	0	0.000147398	0.000184154	8.87e-05	0.000306799	3.75e-05	0.000209468	0.000363114	0.000870595	0.00016679	0	0.000605593	0.000318047
ZOTU4098	0.000386244	0.000188288	5.35e-05	0	0.00039847	0.000139276	0	0	0	3.28e-05	0	0	0	0	0	0	0.000931288	0.000274867	2.2e-05	0	0	0	3.27e-05	0	0	0	0	0.000248348	0.000538412	0.000324851	0	0	0.000554357	0.000451836	6.34e-05	0	0	0	0	0	0	0	0	0	0	0	0	0	0
ZOTU2061	0	0.000836838	5.35e-05	0	0	0	0	0	0	0	0	0	0	0	0	0	0	0	0	0	0	0.00318568	0.000179991	0.000384025	0	0	0	0	0	0	0	0	0	0	0	0	0	0	0	0	0	0	0	0	0	0	0	0	0
ZOTU8069	1.33e-05	0	0	0	0.00113165	0.000139276	0	0	0	0	0	0	0	0	0	0	5.08e-05	0	0	0	0	0	0	0	0	0	0	0.000878768	0.00087492	0.00039704	0	0	0.00108891	0	6.34e-05	0	0	0	0	0	0	0	0	0	0	0	0	0	0
ZOTU5248	0	0	0	0	0.00334715	0.000236769	0	0	0	1.64e-05	0	0	0	0	0	0	1.69e-05	1.72e-05	0	0	0	0	0	0	0	0	0	0.000362969	0.000252381	9.02e-05	0	0	0.000296977	0	0	0	0	0	0	0	0	0	0	0	0	0	0	0	0
ZOTU10075	0	0	0	0	0	0	0	3.45e-05	0.00030435	0	0	0	0	0	0	0	0	0	0	0	0	0	0	0	0	0	0	0	0	1.8e-05	2.33e-05	6.75e-05	0	0	0	9.87e-05	4.31e-05	0	0.000161134	0.000842236	0.00108402	0.000149886	0.000666489	0.00104395	0	0.000548024	0.000196155	0.000532188	0
ZOTU3278	0	0	0	0	0	0	2.18e-05	0.00024165	0.000646744	0	0	0	0	0	0	0	0	0	0	0	0	0	0	0	0	0	0	0	1.68e-05	1.8e-05	9.33e-05	0.000303838	0	0	2.11e-05	0.000138201	0	0	0.00057548	0.000953056	0	0	0	0.000620319	0.000487533	4.77e-05	0	0.00106438	0.000318047
ZOTU3403	0	0	0	0	0	0	0	0	0	0	0	0	0	0	0	0	0	0	0	0	0	0.000202265	0.00112904	0	0	0.00328441	0	0	0	0	0	0	0	0	0	0	0	0	0	0	0	0	0	0	0	0	0	0	0
ZOTU2348	0.000146506	6.28e-05	0	0	0.000143449	0.000292479	0.00063352	0.000120825	3.8e-05	4.92e-05	0	0	0	0	0	0	0.000220123	0.000446659	0	0	0	0	0	0	0	0	0	7.64e-05	0.000353333	0.000216567	0.00025662	0.000101279	7.92e-05	0.000473352	0.000465087	0.000355373	0	1.84e-05	2.3e-05	2.22e-05	2.05e-05	0	0	0	0	0	0	0	0
ZOTU2689	0.00197118	0.000292893	0	0	0	0	0	0	0	3.28e-05	0	0	0	0	0	0	0.0014054	0.000103075	0	0	0	0.00037082	0.000294532	9.14e-05	0	0	0	0	0	1.8e-05	0	0	0	0	2.11e-05	0	0	0	0	0	0	0	0	0	0	0	0	0	0
ZOTU2222	0	2.09e-05	0	0	4.78e-05	0	0	0	0	0	0	0	0.00448964	0	0	0	0	0	0	0	0	0	0	0	0	0	0	0	0	0	0	0	0	0	4.23e-05	0	0	0	0	0	0	0	0	0	0	0	0	0	0
ZOTU10763	0	0	0	0	0	1.39e-05	0	0.000120825	0.000133153	0	0	0	0	0	0	0	0	0	0	0	0	0	0	0	0	0	0	0	0	3.61e-05	9.33e-05	3.38e-05	0	0	0	5.92e-05	0	0	0.00029925	0.000199477	0.000143173	0.000711957	0.00215181	1.51e-05	0	0	0	0.000587242	0
ZOTU2172	0	0	0	0	0	0	0	3.45e-05	7.61e-05	0	0	0	0	0	0	0	0	0	0	0	0	0	0	0	0	0	0	0	0	0	7e-05	6.75e-05	0	0	0	3.95e-05	0	0	6.91e-05	0	0.000184079	0.00065575	0.000266596	0.00290491	0	0.000190617	0	3.67e-05	0
ZOTU9081	2.66e-05	6.28e-05	0	0	0	0	0.000152919	0.000172607	0.000285328	0	0	0	0	0	0	0	0	3.44e-05	0.000241769	0	1.83e-05	3.37e-05	0	1.83e-05	0	0	0	0	0	0.000144378	0.000139974	0.000101279	0	0	0	7.9e-05	0	0.000405343	0.000552461	0.000354626	0.000409065	0.000299771	0.000552234	0.000332854	0.000139295	0	0	3.67e-05	0
ZOTU4054	0	0	0	0	0.00012751	1.39e-05	0	0	0	0	0	0	0	0	0	0	0	0	0	0	0	0	0	0	0	0	0	0.00280824	0.000605714	0.000216567	0	0	0.000791938	0	2.11e-05	0	0	0	0	0	0	0	0	0	0	0	0	0	0
ZOTU10972	0	2.09e-05	0	0	6.38e-05	6.96e-05	0.000939357	0.000138086	7.61e-05	0	0	0	0	0	0	0	0	0	6.59e-05	0.000454513	0.000420191	0	1.64e-05	0	0	0	0	1.91e-05	8.41e-05	0.00019852	0.000326607	0.000270079	0	0	0	0.000157944	4.31e-05	5.53e-05	0.000207173	0.000177313	0.000143173	0.000149886	9.52e-05	0.000226946	0	0	0	0.000165162	0
ZOTU13594	1.33e-05	4.18e-05	0	0	3.19e-05	0.000139276	0.000458756	0.000276172	0.000323372	0	0	0	0	0	0	0	0	1.72e-05	2.2e-05	0	0	0	0	0	0	0	0	0	0.000185079	3.61e-05	0.000419923	0.000337598	0	0	0.000105702	0.000217172	0.000904393	0.000386918	0.000230192	0.000110821	8.18e-05	0	3.81e-05	0.000151297	0	0	0	5.51e-05	0
ZOTU7046	0	0	0	0	0.000876634	0.000738162	2.18e-05	0	3.8e-05	0	0	0	0	0	0	0	0	5.15e-05	0	0	0	0	0	0	0	0	0	0.000955183	0.000790793	0.000613608	4.67e-05	3.38e-05	0.000138589	0	4.23e-05	3.95e-05	0	0.000128973	0	6.65e-05	0	0	0	0	0	0	0	0	0
ZOTU14325	0	0	0	0	0	0.000250696	0.000349528	0.000604125	0.000190219	0	0	0	0	0	0	0	0	0	0	0	0	0	0	0	0	0	0	0	0	0.000180473	0.000443252	0.000607677	0	0	0	9.87e-05	0.000215332	0.00154767	4.6e-05	4.43e-05	0	0	0	0	0	0	0	0	0
ZOTU7027	0	0	0	0	7.97e-05	0.000320334	0.000546138	0.000414257	0.000247285	0	0	0	0	0	0	0	0	0	0	0	0	0	0	0	0	0	0	9.55e-05	0.000269206	0.000469229	0.000559897	0.000405118	3.96e-05	0.000258192	8.46e-05	0.000138201	0.000215332	0.00027637	6.91e-05	6.65e-05	2.05e-05	0	0	0	0	0	0	0	0
ZOTU2624	1.33e-05	0.00445616	0	0	0	0	0	0	0	0	0	0	0	0	0	0	0	0	0	0	0	3.37e-05	6.55e-05	0	0	0	0	0	0	0	0	0	0	0	0	0	0	0	0	0	0	0	0	0	0	0	0	0	0
ZOTU7199	0	0	0	0	0	0	0	5.18e-05	1.9e-05	0	0	0	0	0	0	0	0	0	0	0	0	0	0	0	0	0	0	0	0	5.41e-05	0	0	0	0	0	0	0	0	0.000414346	0.00137417	0.00151354	0.000637014	0.00154245	9.08e-05	5.22e-05	2.38e-05	2.45e-05	3.67e-05	5.96e-05
ZOTU3599	0	0	0	0	3.19e-05	0.00091922	0	0.000172607	9.51e-05	0	0	0	0	0	0	0	0	3.44e-05	0	0	0	0	0	0	0	0	0	3.82e-05	0.000269206	0.000469229	7e-05	0.000236319	0	4.3e-05	0.000169122	0.000118458	0.000839793	0	0.00085171	0.00037679	0.000163626	1.87e-05	0.000171383	0.000181557	0.000435297	0	0	0.000146811	0
ZOTU12304	0	0	0	0	0.000765062	0.000111421	0.000174764	5.18e-05	1.9e-05	1.64e-05	0	0	0	0	0	0	0	0	0	0	0	0	0	0	0	0	0	0.000515799	0.000858095	0.000433135	0.000139974	6.75e-05	0.000316775	0.000645481	0.000295964	0.000138201	0	0	0	0	0	0	0	0	0	0	0	0	0
ZOTU2786	0	0	0	0	0	0	0	3.45e-05	0	0	0	0	0	0	0	0	0	0	0	0	0	0	0	0	0	0	0	0	0	0	0	0	0	0	0	0	0	0	0	0	0	0	0	0	0.000121883	0.000309752	0	0.000477134	0.000178902
ZOTU7891	0	0	0	0	1.59e-05	0	0	0.000414257	0.000722832	0	0	0	0	0	0	0	0	0	2.2e-05	0	0	0	0	0	0	0	0	0	0	0.000108284	7e-05	0.000405118	0	0	0	0.000454088	0	0.000368494	0.000759634	0.000775744	0.000143173	0	0	0.000287465	0	0	0	0	0
ZOTU10252	0	0	0	0	0	8.36e-05	4.37e-05	0.000362475	0.000608701	0	0	0	0	0	0	0	0	0	0	0	0	0	0	0	0	0	0	0	3.37e-05	5.41e-05	0.000209962	0.000371358	0	2.15e-05	4.23e-05	0.000256658	0.000732127	0.00140028	2.3e-05	0.000243805	0	0	5.71e-05	0	0	0	0	0	0
ZOTU2892	2.66e-05	6.28e-05	0	0	0.000159388	0.000487465	0.00019661	0.000276172	0.000133153	0	0	0	0	0	0	0	3.39e-05	8.59e-05	0	0	0	0	1.64e-05	0	0	0	0	7.64e-05	0.000370158	0.00039704	0.000629885	0.000236319	1.98e-05	0	0.000274824	0.000454088	0.000495263	0.000110548	0	0	0	0	0	0	0	0	0	0	0
ZOTU5788	4e-05	0	0	0	4.78e-05	0.000431755	0.000174764	0.000276172	9.51e-05	0	0	0	0	0	0	0	0	0.000171792	0.000109895	0	0	0	0	0	0	0	0	0.000114622	0.000151428	0.000306804	0.000443252	0.000506397	0	0.000236676	0.000105702	5.92e-05	0.00105513	0	6.91e-05	6.65e-05	6.14e-05	0	1.9e-05	0	0	0	0	0	0
ZOTU2107	0	0	0	0	0	0	0	0	0	0	0	0	0	0	0	0	0	0	0	0	0	0	0	0	0	0	0	0	0	0	0	0	0	0	0	0	0	0	0	0	0	0	0	0	0	0.000190617	0.00561495	1.84e-05	0
ZOTU2865	4e-05	0	0	0	0.000637552	0.000431755	8.74e-05	0	0	3.28e-05	0	0	0	0	0	0	5.08e-05	0.00061845	0	0	0	0	0	0	0	0	0	0.000687732	0.000504762	0.000252662	2.33e-05	0	0.000277178	0.000602449	0.000274824	0	0	0	0	0	0	0	0	0	0	0	0	0	0
ZOTU2820	0	0.000146447	0	0	6.38e-05	0.000417827	0.00063352	0.000258911	0.000608701	0	0	0	0	0	0	0	0	1.72e-05	0.000461559	0	0	1.69e-05	0	0	0	0	0	1.91e-05	3.37e-05	0.000469229	0.000536568	0.000236319	1.98e-05	0	0	0.000296144	0.000387597	0.000755412	0.000322269	0	0.000102266	0	0	0	0	0	0	0	0
ZOTU4728	0	0	0	0	0	0	0	0.000103564	0.000152175	0	0	0	0	0	0	0	0	0	0	0	0	0	0	0	0	0	0	0	0	9.02e-05	0	3.38e-05	0	0	0	3.95e-05	0	0	0.000667557	0.00037679	0.000613597	0.000468393	0.00169479	6.05e-05	0.000121883	0.000190617	2.45e-05	7.34e-05	0.000894508
ZOTU11505	0	0	0	0	4.78e-05	0	0	0	0	0	0	0	0	0	0	0	0	3.44e-05	0	0	0	0	0	0	0	0	0	0.000133726	0.000100952	9.02e-05	0.000163303	0	0.0038607	0	8.46e-05	0	0	0	0	0	0	0	0	0	0	0	0	0	0
ZOTU3029	1.33e-05	4.18e-05	0	0	0	0	0	1.73e-05	0	0	0	0	0	0	0	0	0	6.87e-05	0.00123082	0.00251403	0.000347114	0	0	0	0	0	0	0	0	0	0	3.38e-05	0	0	0	0	0	0	0	8.87e-05	0	0.000112414	0	0	0	4.77e-05	0	0	0
ZOTU5065	0	0	0	0	0	0	0	0	0	0	0	0	0	0	0	0	0	0	0	0	0	3.37e-05	0.000310894	5.49e-05	0	0	0.00411423	0	0	0	0	0	0	0	0	0	0	0	0	0	0	0	0	0	0	0	0	0	0
ZOTU13684	0	0	0	0	0	0	0	0.000276172	0.000627723	0	0	0	0	0	0	0	0	0	0	0	0	0	0	0	0	0	0	0	0	9.02e-05	0.000163303	0.000405118	0	0	0	0.000118458	0	3.68e-05	0.000414346	0.000531938	0.000265892	0.000449657	0.000685531	0.000121038	0.000226355	0	0	9.18e-05	0
ZOTU10482	2.66e-05	2.09e-05	0	0	0.000541919	0.000320334	2.18e-05	0	0	0	0	0	0	0	0	0	3.39e-05	6.87e-05	0	0	0	0	0	0	0	0	0	0.00106981	0.00065619	0.00059556	4.67e-05	3.38e-05	0.000673147	0.000193644	0.000190263	0	0	0	0	0	0	0	0	0	0	0	0	0	0
ZOTU2725	0	0	0	0	0	0	0	0	0	0	0	0	0	0	0	0	0	0	0	0	0	0	0	0	0	0	0	0	0	0	0	0	0	0	0	0	0	0	2.3e-05	0	6.14e-05	0	0	0	0	0.00312135	0	0	3.98e-05
ZOTU10512	0	0	0	0	0	0.000208914	0.000174764	0.00070769	0.000989138	0	0	0	0	0	0	0	0	0	0	0	0	0	0	0	0	0	0	1.91e-05	0	0.000162426	0.000443252	0.000371358	0	0.000623965	2.11e-05	0.000612031	0.000150732	0.000552741	0.000184154	0	0	0	0	0.000529541	0	2.38e-05	0	0	0
ZOTU2731	0	4.18e-05	0	0	6.38e-05	0.000376045	0.000830129	0.000293432	0.000266307	0	0	0	0	0	0	0	0	5.15e-05	4.4e-05	0	0	0	0	0	0	0	0	0	6.73e-05	0.000108284	0.000583226	0.000236319	1.98e-05	0	0.000211403	0.000236915	0.000689061	0.000239521	4.6e-05	0	4.09e-05	1.87e-05	1.9e-05	0	0	0	0	0	0
ZOTU14163	0	4.18e-05	0	0	6.38e-05	0.000167131	0	5.18e-05	9.51e-05	0	0	0	0	0	0	0	0	6.87e-05	4.4e-05	0	0	0	0	0	0	0	0	0.000286555	0.00134603	0.00079408	0.00048991	6.75e-05	0.000217783	0.000408804	0.000147982	0	0	0	0.000184154	0	0	0	0	0	0	0	0	0	0
ZOTU9487	0.000119869	8.37e-05	0	0	7.97e-05	0.000125348	0.00043691	0.000138086	0	0	6.99e-05	0	0	0	0	0	0.00027092	8.59e-05	0.000109895	0	0	0	0	0	0	0	0	5.73e-05	0.000185079	0.000252662	0.000559897	0.000202559	0	0.00159219	6.34e-05	3.95e-05	0	0	0	0	0	0	0	0	0	0	0	0	0
ZOTU13359	4e-05	2.09e-05	0	0	3.19e-05	9.75e-05	6.55e-05	0	0	0	0	0	0	0	0	0	0	0.000257688	0.002088	0.00139195	0	0	0	0	0	0	0	0	1.68e-05	0	9.33e-05	6.75e-05	0	0.00021516	4.23e-05	3.95e-05	0	0	0	0	0	0	0	0	0	0	0	0	0
ZOTU12422	0	0	0	0	1.59e-05	5.57e-05	0.000174764	0.000207129	0.000152175	0	0	0	0	0	0	0	0	0	2.2e-05	0	0	0	1.64e-05	0	0	0	0	1.91e-05	1.68e-05	0.000288757	0.000233291	0.000371358	0	0	6.34e-05	0.000138201	0.00131352	0.000128973	6.91e-05	4.43e-05	8.18e-05	0	0	0.000105908	3.48e-05	0	0	0.000752404	0.000159024
ZOTU14024	0	0	0	0	0	5.57e-05	4.37e-05	5.18e-05	0.000114131	0	0	0	0	0	0	0	0	0	0	0	0	0	0	0	0	0	0	0	0	0	9.33e-05	0.000101279	0	0	0	0.000118458	0	3.68e-05	6.91e-05	0.000288133	0.000511331	0.000355979	0.00201851	6.05e-05	0.000261178	0	0	0.000311972	0.00123243
ZOTU3570	1.33e-05	2.09e-05	0	0	1.59e-05	0.000306407	0.000305837	0.000224389	0.000228263	0	0	0	0	0	0	0	0	3.44e-05	0.0013627	0.000582345	0	0	0	0	0	0	0	0	3.37e-05	0.000126331	0.000186632	0.000168799	0	0	8.46e-05	0.000355373	0	0.00058959	0.000207173	0.000310297	6.14e-05	5.62e-05	0.000171383	0.000121038	3.48e-05	0	0	0.000110108	0
ZOTU10189	0	0	0	0	0	1.39e-05	0.000152919	0.000155347	0.000209241	0	0	0	0	0	0	0	0	0	8.79e-05	0	0	0	0	0	0	0	0	0	0	0.000126331	0.000349936	3.38e-05	0	0	0	9.87e-05	0	0.000736988	0.000138115	0.000221641	0.000409065	0.000749429	0.000514149	0.000680838	1.74e-05	2.38e-05	0	0.000990971	0
ZOTU8388	0.000692576	0.00023013	0	0	0.000302837	6.96e-05	4.37e-05	6.9e-05	1.9e-05	0.000262416	0.000363418	0	0	0	0	0	0.000931288	1.72e-05	0	0	0	0	0	0	0	0	0	0.000267451	0.000370158	0.000360946	2.33e-05	0.000168799	0.000178186	0	4.23e-05	3.95e-05	0	0	0	0	0	0	0	0	0	0	0	0	0
ZOTU11366	0	2.09e-05	0	0	0.000494103	8.36e-05	0	3.45e-05	0	1.64e-05	0	0	0	0	0	0	1.69e-05	0	0	0	0	0	0	0	0	0	0	0.00057311	0.000302857	9.02e-05	0	0	0.000712744	0.00032274	0.00147982	1.97e-05	0.000279931	0	0	0	0	0	0	0	0	0	0	0	0
ZOTU9366	0.000479476	8.37e-05	0	0	9.56e-05	4.18e-05	0	0	0	0.000360821	0.000181709	0	0	0	0	0	0.0013038	0.000377942	2.2e-05	0	0	8.43e-05	0	0	0	0	0	9.55e-05	0.000403809	0.000126331	0	0	0.000118791	0.000602449	6.34e-05	0	0	0	0	0	0	0	0	0	0	0	0	0	0
ZOTU2594	0.00075917	0.000271972	0	0	1.59e-05	0	0	0	0	1.64e-05	9.78e-05	0	0	0	0	0	3.39e-05	0.00319533	0	0	0	3.37e-05	0	0	0	0	0	0	1.68e-05	0	0	0	0	0	0	0	0	0	0	0	0	0	0	0	0	0	0	0	0
ZOTU8492	0	0	0	0	0.000589735	0.000125348	0	0	1.9e-05	0	0.000181709	0	0	0	0	0	0	0.000137433	0	0	0	0	0	0	0	0	0	0.00131815	0.000403809	0.000288757	0	3.38e-05	0.00102952	0	0.000211403	7.9e-05	0	0	0	0	2.05e-05	0	0	0	0	0	0	0	0
ZOTU13982	0	0	0	0	0.000159388	8.36e-05	0	0	0	0	0	0	0	0	0	0	3.39e-05	0	0	0	0	0	0	0	0	0	0	0.0010507	1.68e-05	0.000270709	0	0	0.00281138	0	0	0	0	0	0	0	0	0	0	0	0	0	0	0	0
ZOTU14155	0	0	0	0	0	0.000320334	0.00019661	0.000621386	0.000551635	0	0	0	0	0	0	0	0	0	0	0	0	0	0	0	0	0	0	0	1.68e-05	0.000126331	0.000279949	0.000303838	1.98e-05	0	0	0.000236915	0	0.000534316	0.000345288	0.000265969	0.000736317	0.000187357	0.000457021	0.000105908	0	0	0	0.000311972	5.96e-05
ZOTU11452	2.66e-05	0.000460261	0	0	0.000111572	0.000111421	0.000174764	0.000138086	0.000133153	0	0	0	0	0	0	0	0	1.72e-05	6.59e-05	0	0	0	0	0	0	0	0	0.000114622	6.73e-05	5.41e-05	0.000209962	0.000168799	1.98e-05	0.000301224	0.000465087	0.000315887	0.000495263	0.000608015	2.3e-05	4.43e-05	2.05e-05	1.87e-05	3.81e-05	7.56e-05	0.000121883	0	0	1.84e-05	0
ZOTU2377	0.000253057	4.18e-05	0	0	1.59e-05	1.39e-05	0	0	0	0	0	0	0	0	0	0	5.08e-05	1.72e-05	0	0	0	0.000471953	0.001849	0.000475459	0.000973939	0	0	3.82e-05	0	0	0	0	0.000118791	0	8.46e-05	0	0	0	0	0	0	0	0	0	0	0	0	0	0
ZOTU1860	1.33e-05	8.37e-05	0	0	0.000191266	0.000264624	0	0.000103564	1.9e-05	0	0	0.00175725	0	0	0	0	1.69e-05	0.000188971	0	0	0	0	0	0	0	0	0	0.000936079	0.000201905	0.00019852	0	0	0.000138589	0	0.000105702	0	0	0	0.000161134	2.22e-05	0	0	0	0	0	0	0	0	0
ZOTU11238	0	0	0	0	0.000143449	6.96e-05	0	3.45e-05	1.9e-05	0	0	0	0	0	0	0	0	3.44e-05	0	0	0	0	1.64e-05	0	0	0	0	0.00124174	0.000639365	0.000577513	2.33e-05	3.38e-05	0.00118791	8.61e-05	0.000274824	1.97e-05	0	0	0	0	0	0	0	0	0	0	0	0	0
ZOTU8386	0	0	0	0	1.59e-05	0.000501393	0	0	0	0	0	0	0	0	0	0	0	0	0	0	0	0	0	0	0	0	0	0	5.05e-05	0.000126331	0.00305611	0.000540157	0	0	0.000105702	0	0	0	0	0	0	0	0	0	0	0	0	0	0
ZOTU1994	0	0	0	0	0	0	0	0	0	0	0	0	0	0	0	0	0	0	0	0	0	0	1.64e-05	0.00437056	0	0	0	0	0	0	0	0	0	0	0	0	0	0	0	0	0	0	0	0	0	0	0	0	0
ZOTU14525	0	0	0	0	0	0	0	0.000293432	0.000608701	0	0	0	0	0	0	0	0	0	0	0	0	0	0	0	0	0	0	0	0	0	0	0.000371358	0	0	0	0.000177687	0	0	0.000322269	0.000731415	0.000470425	0.000374714	0.000304681	0.000257206	5.22e-05	0	0	0.00042208	0
ZOTU6979	0	2.09e-05	0	0	0.000557858	6.96e-05	0	0	0	1.64e-05	0	0	0	0	0	0	1.69e-05	1.72e-05	0	0	0	0	0	0	0	0	0	0.00181485	0.000302857	0.00059556	0	0	0.000950326	0	2.11e-05	0	0	0	0	0	0	0	0	0	0	0	0	0	0
ZOTU5136	0	0	0	0	0.000207204	0.000431755	0.000611674	0.000276172	0.000760876	0	0	0	0	0	0	0	3.39e-05	1.72e-05	0	0	0	0	0	0	0	0	0	0	0.000100952	0.000216567	0.000349936	0.000371358	0.000138589	0	0.000169122	0.000394859	0.000279931	0	2.3e-05	0	0	0	0	0	0	0	0	0	0
ZOTU2910	0.000159825	0.00405866	0	0	0	0	0	0	0	0	0	0	0	0	0	0	0	0	0	0	0.000164423	0	0	0	0	0	0	0	0	0	0	0	0	0	0	0	0	0	0	0	0	0	0	0	0	0	0	0	0
ZOTU14337	0	0	0	0	1.59e-05	0.000153203	0.000742747	0.000120825	0.000247285	0	0	0	0	0	0	0	0	6.87e-05	0.000241769	0	0	0	0	0	0	0	0	0	6.73e-05	0	0.000396594	0.000168799	1.98e-05	0.000150612	0.000147982	0.000315887	0.000387597	0.000681713	0	0	2.05e-05	0.000374714	0	6.05e-05	0	0	0	0	0
ZOTU14226	0	0	0	0	0	0	0	0.000362475	0.00102718	0	0	0	0	0	0	0	0	0	0	0	0	0	0	0	0	0	0	0	0	7.22e-05	0	6.75e-05	0	0	0	3.95e-05	0	0	0.000322269	0.000332462	0	5.62e-05	0.000590319	0.000832136	0.000940242	0	0	0.000734053	0.000218657
ZOTU11448	0	8.37e-05	0	0	0.000191266	0.000431755	0.000655365	0.000224389	0.000152175	0	0	0	0	0	0	0	0	0.000171792	0.000109895	2.84e-05	0	0	0	0	0	0	0	7.64e-05	0.00021873	0.000252662	0.000279949	0.000303838	0.000138589	8.61e-05	0.000359385	0.000236915	0.000344531	0	2.3e-05	0	0	0	0	0	0	0	0	0	0
ZOTU1952	0	0	0	0	0	0	0	0	0	0	0	0	0	0	0	0	0	0	0	0	0	0.00428128	8.18e-05	0	0	0	0	0	0	0	0	0	0	0	0	0	0	0	0	0	0	0	0	0	0	0	0	0	0
ZOTU14076	5.33e-05	6.28e-05	0	0	0.000637552	0.000153203	2.18e-05	0	0	1.64e-05	0	0	0	0	0	0	5.08e-05	0.000171792	0	0	0	0	0	0	0	0	0	0.000974286	0.000370158	0.000685797	0	6.75e-05	0.000970124	6.45e-05	4.23e-05	1.97e-05	0	0	0	0	0	0	0	0	0	0	0	0	0
ZOTU12026	1.33e-05	0	0	0	0.0012751	0.00111421	0.000830129	3.45e-05	0	1.64e-05	0	0	0	0	0	0	3.39e-05	0.000377942	4.4e-05	0	0	0	0	0	0	0	0	0	0.000353333	0	2.33e-05	0	0	0	0	0	0	0	0	0	0	0.00013115	0.000114255	0	0	0	0	0	0
ZOTU2188	4e-05	0	0	0	0.000191266	0.000445682	0.000480601	0.000621386	0.000190219	3.28e-05	0	0	0	0	0	0	1.69e-05	0.000223329	2.2e-05	0	0	1.69e-05	0	0	0	0	0	0	3.37e-05	3.61e-05	4.67e-05	0.000135039	0	0	4.23e-05	0.000118458	0.000990525	0.000202672	4.6e-05	4.43e-05	8.18e-05	1.87e-05	0.000171383	0	1.74e-05	0	0	9.18e-05	0
ZOTU5810	0	0	0	0	0.000111572	0.000376045	0.000851975	0.000293432	5.71e-05	0	0	0	0	0	0	0	0	0	0	0	0	0	0	0	0	0	0	0.000229244	0.000370158	0.000360946	0.000466581	0.000472638	5.94e-05	0	0	0.000177687	0.000322997	0.000184247	2.3e-05	0	0	0	0	0	0	0	0	0	0
ZOTU4828	4e-05	6.28e-05	0	0	0.000207204	0.000362117	0	0	0	6.56e-05	0	0	0	0	0	0	5.08e-05	0.000120254	0	0	0	0	0	0	0	0	0	0.000534902	0.000757142	0.00101065	4.67e-05	0	0.000950326	0	0.000126842	0	0	0	0	0	0	0	0	0	0	0	0	0	0
ZOTU3092	1.33e-05	0	0	0	9.56e-05	0.000431755	0.00113597	0.000258911	0.000114131	0	0	0	0	0	0	0	1.69e-05	0.00020615	0.000131874	0	0	0	0	0	0	0	0	0.000133726	0.000269206	0.000270709	0.000233291	0.000168799	5.94e-05	0.000150612	0.000147982	0.000138201	0.000279931	7.37e-05	0	0	0	0	0	0	0	0	0	0	0
ZOTU14015	0	0	0	0	0	0	2.18e-05	5.18e-05	7.61e-05	0	0	0	0	0	0	0	0	0	0	0	0	0	0	0	0	0	0	0	0	7.22e-05	4.67e-05	6.75e-05	0	0	0	5.92e-05	0.000215332	0	0.000207173	0.000177313	0.000286345	0.00065575	0.000818829	0.000151297	5.22e-05	0.00033358	0.000882699	0.000385378	0.000198779
ZOTU13675	6.66e-05	6.28e-05	0	0	0.00124323	0.000139276	0	0	0	1.64e-05	0	0	0	0	0	0	1.69e-05	0	0	0	0	0	0	0	0	0	0	0.00114622	3.37e-05	7.22e-05	0	0	0.00152448	0	0	0	0	0	0	0	0	0	0	0	0	0	0	0	0
ZOTU8319	0	0	0	0	0.000621613	8.36e-05	0	0	0	0	0	0	0	0	0	0	0	3.44e-05	0	0	0	1.69e-05	1.64e-05	0	0	0	0	0.00118443	0.000302857	0.000270709	2.33e-05	0	0.000910729	0.000494868	0.000359385	0	0	0	0	0	0	0	0	0	0	0	0	0	0
ZOTU2284	0	0	0	0	0	0	0	0	0	0	0	0	0	0	0	0	0	0	0	0	0.00431153	0	0	0	0	0	0	0	0	0	0	0	0	0	0	0	0	0	0	0	0	0	0	0	0	0	0	0	0
ZOTU9640	0.000346288	0.000125526	0	0	0.000111572	9.75e-05	0.000393219	8.63e-05	1.9e-05	0.000114807	0.000195687	0	0	0	0	0	0.000287853	0.000498196	0	0	0	3.37e-05	1.64e-05	0	0	0	0	3.82e-05	0.000252381	0.000288757	0.000186632	6.75e-05	0.000217783	0	0.000528508	0.000197429	0	0.000184247	2.3e-05	0	0	0	0	0	0	0	0	0	0
ZOTU2880	0	2.09e-05	0	0	0	0.000194986	0.00174764	3.45e-05	9.51e-05	0	0	0	0	0	0	0	0	0.000188971	0.00021979	0	0	0	0	0	0	0	0	7.64e-05	3.37e-05	0.000108284	0.000326607	3.38e-05	0	0.000150612	0.000930174	0.000138201	0	0	0	0	0	0	0	0	0	0	0	0	0
ZOTU4515	0.000173144	2.09e-05	0	0	3.19e-05	9.75e-05	2.18e-05	1.73e-05	0	8.2e-05	0	0	0	0	0	0	0.00027092	0.000292046	0	0	0	1.69e-05	0	0	0	0	0	1.91e-05	5.05e-05	1.8e-05	0.000163303	0	0.000732543	0.000753061	0.0013107	0	0	0.000202672	0	0	0	0	0	0	0	0	2.45e-05	0	0
ZOTU7391	0	0	0	0	0.000318776	0.000362117	0.000240301	0.000155347	1.9e-05	0	0	0	0	0	0	0	1.69e-05	1.72e-05	0	0	0	0	0	0	0	0	0	7.64e-05	0.000319682	0.000216567	0.000186632	6.75e-05	0.000178186	0.000623965	0.000591929	0.000118458	0.000710594	7.37e-05	0	0	0	0	0	0	0	0	0	0	0
ZOTU4948	0	0	0	0	0	9.75e-05	4.37e-05	0.000621386	0.000684788	0	0	0	0	0	0	0	0	0	0	0	0	0	0	0	0	0	0	1.91e-05	0	9.02e-05	0.000793188	0.000472638	0	0	0.000105702	0.000276401	0.000796727	0.00143713	4.6e-05	0	0	0	0	1.51e-05	0	0	0	0	0
ZOTU13601	0	0	0	0	3.19e-05	0.000194986	0.000502447	0.000845775	0	0	0	0	0	0	0	0	0	0	4.4e-05	0	0	5.06e-05	0	0	0	0	0	0	3.37e-05	7.22e-05	0.000629885	0.000607677	0	0	0.000338245	0.000612031	0.000150732	0.000165822	0	0	0	0	0	0	0	0	0	0	0
ZOTU2818	2.66e-05	4.18e-05	0	0	4.78e-05	0.000389972	0.00131073	0.000448779	9.51e-05	0	0	0	0	0	0	0	5.08e-05	5.15e-05	0.000263748	0	0	0	0	0	0	0	0	0	8.41e-05	7.22e-05	0.000349936	0.000506397	0	0.000279708	0	1.97e-05	0.000215332	1.84e-05	0	0	0	0	0	0	0	0	0	0	0
ZOTU13545	0	0	0	0	1.59e-05	2.79e-05	6.55e-05	0.000327954	0.00039946	0	0	0	0	0	0	0	0	1.72e-05	0	0	0	0	0	0	0	0	0	1.91e-05	3.37e-05	3.61e-05	0.000139974	0.000506397	0	0	0	0.000118458	0	0.000221096	0.000736614	0.000421118	0.000143173	0.000599543	0.000133298	0.000196687	0	0	0	0.000110108	0
ZOTU7792	0	0	0	0	0	0	0	0.000327954	0.000513591	0	0	0	0	0	0	0	0	0	0	0	0	0	0	0	0	0	0	0	0	1.8e-05	0.000139974	0.000506397	0	0.000193644	0	0.000138201	0	0	0.000184154	0.000598431	6.14e-05	0	0	4.54e-05	0	0	0	0.00154151	0
ZOTU4805	0	0	0	0	0.000414409	0.000501393	0.000742747	0.000189868	0	0	0	0	0	0	0	0	0	0	0	0	0	0	0	0	0	0	0	3.82e-05	0.000420635	0.00066775	0.000583226	0.000337598	0.000277178	0.000408804	0.000126842	7.9e-05	0.00040913	0.00027637	2.3e-05	0	0	0	0	0	0	0	0	0	0
ZOTU10079	1.33e-05	2.09e-05	0	0	9.56e-05	4.18e-05	0.00209717	5.18e-05	5.71e-05	0	0	0	0	0	0	0	0	0	0	0	0	0	0	0	0	0	0	0	8.41e-05	5.41e-05	0.000186632	0.000135039	1.98e-05	0.000129096	2.11e-05	0	0.000430663	0.000829111	0	0	0	0	0	0	0	0	0	0	0
ZOTU7486	0	0	0	0	0	0	0	0	0	0	0	0	0	0	0	0	0	0	0	0	0	0	0	0	0	0	0	0	0	0	0	0	0	0	0	0	0	0	0	0	2.05e-05	0	0	0	6.96e-05	0.000142963	0	0	0.00341901
ZOTU4903	0	0	0	0	0	0	0	0	0	0	0	0	0	0	0	0	0	0	0	0	0	0	0	0	0	0	0	0	0	0	0	0	0	0	0	0	0	0	0	0	0.000163626	0.00134897	0.00392276	3.03e-05	0	0	0	0	0
ZOTU2666	1.33e-05	2.09e-05	0	0	0.000350653	0.000222841	0.000524292	6.9e-05	1.9e-05	0	0	0	0	0	0	0	3.39e-05	0.000343584	8.79e-05	0	0	0	1.64e-05	0	0	0	0	0.000840561	0.000386984	0.000360946	0.000116645	0.000135039	0.000217783	0.000258192	4.23e-05	1.97e-05	0.000172265	0	0	0	0	0	0	0	0	0	0	0	0
ZOTU4427	1.33e-05	4.18e-05	0	0	0	0	0	0	0	0	0	0	0	0	0	0	0	0	0	0	0	0	0	0	0	0	0.0041949	0	0	0	0	0	0	0	0	0	0	0	0	0	0	0	0	0	0	0	0	0	0
ZOTU2506	0	0	0	0	0	0.000250696	0.00019661	0.000517822	0	0	0	0	0	0	0	0	0	3.44e-05	6.59e-05	0	0	0	0	0	0	0	0	0	3.37e-05	7.22e-05	0.000349936	0.000641437	0	0.00043032	2.11e-05	0.000612031	0.000710594	0.000221096	6.91e-05	2.22e-05	0	0	0	0	0	0	0	0	0
ZOTU10332	0	0	0	0	6.38e-05	4.18e-05	0.000327683	0.000396997	0.000266307	0	0	0	0	0	0	0	0	1.72e-05	0	0	0	0	0	0	0	0	0	0	5.05e-05	0.000144378	0.000279949	0.000675197	1.98e-05	0	0.000190263	0.000118458	0.000344531	0.00128973	0	2.22e-05	0	0	0	0	0	0	0	0	0
ZOTU2244	1.33e-05	0.00217578	8.02e-05	0	0	0	0	0	0	0	0	0	0	0	0	0	0	6.87e-05	0.000131874	0	0	0.0012473	0.000474523	0	0	0	0	0	0	1.8e-05	0	0	0	0	0	0	0	0	2.3e-05	0	0	0	0	0	0	0	0	0	0
ZOTU7007	0	0	0	0	0.000175327	0.00118384	0	0	0	0	0	0	0	0	0	0	0	1.72e-05	0	0	0	0	0	0	0	0	0	0.000114622	0.000538412	0.000234615	0.000373265	6.75e-05	9.9e-05	0.000279708	0.00114158	0	0	0	0	0	0	0	0	0	0	0	0	0	0
ZOTU10889	0	2.09e-05	0	0	1.59e-05	1.39e-05	0	0.000120825	7.61e-05	0	0	0	0	0	0	0	0	0	0	0	0	0	0	0	0	0	0	1.91e-05	1.68e-05	0.000108284	9.33e-05	0.000607677	0	0	0	0.00053306	0.000861326	0.0017135	2.3e-05	0	0	0	0	0	0	0	0	0	0
ZOTU10064	0	2.09e-05	0	0	0	1.39e-05	0	0.000138086	0.000323372	0	0	0	0	0	0	0	0	0	2.2e-05	0	0	0	0	0	0	0	0	1.91e-05	0	1.8e-05	9.33e-05	0	0	0	0	0	4.31e-05	0	0.00087473	0.000354626	0.000306799	0.000824371	0.000799787	0.000242076	0	0	0	0.000128459	0
ZOTU5126	0	0	0	0	0.000111572	0.000543175	0.000589829	5.18e-05	0	0	0	0	0	0	0	0	0	0	0	0	0	0	0	0	0	0	0	0	0.000100952	9.02e-05	0.000186632	0	0	0.00109732	0.000253684	3.95e-05	0.000602929	0.000552741	0	0	0	0	0	0	0	0	0	0	0
ZOTU2713	0	0	0	0	0.00114759	6.96e-05	0	0	0	0	0	0	0	0	0	0	1.69e-05	1.72e-05	0	0	0	0	0	0	0	0	0	0.0015856	0.000286032	0.000252662	2.33e-05	0	0.000712744	0	0.000105702	0	0	0	0	0	0	0	0	0	0	0	0	0	0
ZOTU9400	0	0	0	0	0.000318776	0.000250696	2.18e-05	1.73e-05	0	3.28e-05	0	0	0	0	0	0	0	1.72e-05	0	0	0	0.000117988	0.000294532	0	0	0	0	0.00147098	5.05e-05	0.000451182	0	0	0.00116811	0	0	0	0	0	0	0	0	0	0	0	0	0	0	0	0
ZOTU10005	0	0	0	0	0	0	0	1.73e-05	3.8e-05	0	0	0	0	0	0	0	0	0	0	0	0	0	0	0	0	0	0	0	0	1.8e-05	0	0	0	0	0	0	0	0	0	0	4.09e-05	0.000112414	0.000476064	0	0	0.00312135	0	0	0
ZOTU11616	0	0	0	0	0	8.36e-05	0	0	0	1.64e-05	0	0	0	0	0	0	0	0	0	0	0	0	0	0	0	0	0	0	0	3.61e-05	2.33e-05	0	0.00152448	0.00105429	0.00105701	0	0.000172265	0.000221096	0	0	0	0	0	0	0	0	0	0	0
ZOTU2047	0	0	0	0	0	0	0	0	0	0.000213213	0.000265575	0.00370447	0	0	0	0	0	0	0	0	0	0	0	0	0	0	0	0	0	0	0	0	0	0	0	0	0	0	0	0	0	0	0	0	0	0	0	0	0
ZOTU7389	0	0.000502103	0	0	0	0.000236769	0.000502447	0.000276172	0.000513591	0	0	0	0	0	0	0	0	0	6.59e-05	0.000454513	0	3.37e-05	1.64e-05	0	0	0	0	1.91e-05	3.37e-05	0.000162426	0.000396594	0.000202559	0	0	0	0.000236915	0.000645995	0.000239521	0.000368307	0.000265969	0.000143173	0.000112414	1.9e-05	1.51e-05	0	0	0	0	0
ZOTU2883	0.000199782	6.28e-05	0	0	7.97e-05	6.96e-05	0	0	0	0	0	0	0	0	0	0	0.00299705	0.000687167	0	0	0	0	1.64e-05	0	0	0	0	1.91e-05	0	0	0	0	3.96e-05	0	0	0	0	0	0	0	0	0	0	0	0	0	0	0	0
ZOTU11811	0	0	0	0	0	6.96e-05	0.000131073	0.000362475	0.000627723	0	0	0	0	0	0	0	0	0	0	0	0	0	0	0	0	0	0	1.91e-05	0	0.000126331	0.000419923	0.000337598	0	0	0	0.000513317	2.15e-05	0.00027637	0.00027623	0.00048761	0.000327252	0.000281036	0.00015234	0.000332854	6.96e-05	0	0	0.000458783	0
ZOTU9684	0	0	0	0	3.19e-05	1.39e-05	0	0	0	0	0	0	0	0	0	0	0	0	0	0	0	0	0	0	0	0	0	0	6.73e-05	0.000108284	0	0	0.00364292	0	0.000295964	0	0	0	0	0	0	0	0	0	0	0	0	0	0
ZOTU2522	0	0	0	0	0	0	0	0	0	0	0	0	0	0	0	0	0	1.72e-05	0	0	0	0.0017024	0.00134176	0.000256016	0.000839602	0	0	0	0	0	0	0	0	0	0	0	0	0	0	0	0	0	0	0	0	0	0	0	0
ZOTU8839	0	0	0	0	0	0.000139276	8.74e-05	0.000345214	0.000247285	0	0	0	0	0	0	0	1.69e-05	0.000137433	0.000153853	0	0	5.06e-05	1.64e-05	0	0	0	0	3.82e-05	0.000151428	0.000144378	0.000303278	0.000371358	0	0	8.46e-05	0.000236915	0.000861326	0.000442193	0.000138115	0	0.000143173	3.75e-05	0	0	0	0	0	0	0
ZOTU12735	0	0	0	0	0.000334715	0.000139276	0.000786438	0.000138086	0	0	0	0	0	0	0	0	0	6.87e-05	0.000901139	0	0	0	0	0	0	0	0	1.91e-05	0.000185079	0.000270709	0.000326607	6.75e-05	0	0	0.000169122	1.97e-05	0.000366064	0.000350069	0	0	0	0	0	0	0	0	0	0	0
ZOTU12133	0	0	0	0	0	0.000167131	6.55e-05	0.0004833	0.000456525	0	0	0	0	0	0	0	0	0	0	0	0	0	0	0	0	0	0	0	0	3.61e-05	0.000163303	0.000573917	0	0.000193644	0.000105702	0.000789718	2.15e-05	0.00027637	6.91e-05	2.22e-05	2.05e-05	0	0	6.05e-05	0.000383062	0	0	7.34e-05	0.000178902
ZOTU13147	0	4.18e-05	0	0	0	0.000139276	0.00019661	0.000414257	0.000817941	0	0	0	0	0	0	0	0	0	0.00021979	0	0	0	0	0	0	0	0	0	0	0.000433135	0.000559897	0.000371358	0	0	4.23e-05	0.00053306	0	0.000423768	0.000115096	0.000199477	2.05e-05	9.37e-05	0.000133298	0.000105908	6.96e-05	7.15e-05	0	0.000220216	0
ZOTU3239	0	0	0	0	0	0	0	6.9e-05	0.000152175	0	0	0	0	0	0	0	0	0	0	0	0	0	0	0	0	0	0	0	0	1.8e-05	9.33e-05	0	0	0	0	9.87e-05	0	0	0.00027623	0.00164014	8.18e-05	0.000337243	0.000190425	0.00164914	0	0	0	0.000642296	0
ZOTU3706	9.32e-05	0.000418419	0	0	0	1.39e-05	0.000720902	0.000621386	0.000133153	0	0	0	0	0	0	0	0	1.72e-05	0.000197811	0	0	1.69e-05	0	0	0	0	0	0	0	0.000162426	0.000396594	0.000641437	0	0	0	5.92e-05	0	0	0.000368307	0	4.09e-05	0.000206093	1.9e-05	0	0	0	0	0	0
ZOTU13803	0	0	0	0	3.19e-05	4.18e-05	0.000109228	0.000379736	0.000817941	0	0	0	0	0	0	0	1.69e-05	0	0	0	0	0	0	0	0	0	0	1.91e-05	0	5.41e-05	0.000163303	0.000168799	3.96e-05	0	0	0.000473831	0.000366064	0	0.000391326	4.43e-05	0	0	3.81e-05	0.000665708	0	0	0	3.67e-05	0
ZOTU6998	0	0	0	0	0.000653491	0.000696379	2.18e-05	1.73e-05	1.9e-05	0	0	0	0	0	0	0	0	0	0	0	0	0	0	0	0	0	0	0.000362969	0.000841269	0.000288757	0.000116645	0.000337598	5.94e-05	0	0.000338245	0.000256658	0	0.000110548	0	0	0	0	0	0	0	0	0	0	0
ZOTU4525	0.00101223	0.000125526	0	0	0.000175327	0.000111421	0.000131073	1.73e-05	0	0.000131208	0	0	0	0	0	0	0.000558773	0.000154613	0	0	0	6.74e-05	0	0	0	0	0	0.000229244	0.000185079	0.000144378	0.000116645	0.000135039	0.00025738	0	0.000422806	7.9e-05	6.46e-05	0	0	0	0	0	0	0	0	0	0	0	0
ZOTU9156	0	0	0	0	0	8.36e-05	0.000830129	0.000552343	0.000114131	0	0	0	0	0	0	0	0	5.15e-05	0	0.000326681	0	0	0	0	0	0	0	1.91e-05	1.68e-05	0.000162426	0.000396594	0.000472638	0	4.3e-05	0.000169122	0.000454088	0	0	0.000322269	0	2.05e-05	7.49e-05	0	0	0	0	0	0	0
ZOTU2118	0	0.000146447	0.000374241	0	0	0	0	0	0	0	0	0	0	0	0	0	0	0	8.79e-05	0.00289752	0.000602883	0	0	0	0	0	0	0	0	0	0	0	0	0	0	0	0	0	0	0	0	0	0	0	0	0	0	0	0
ZOTU8729	0	0	0	0	0	0	2.18e-05	3.45e-05	0.000114131	0	0	0	0	0	0	0	0	0	0	0	0	0	0	0	0	0	0	0	0	0	4.67e-05	3.38e-05	0	0	0	3.95e-05	0	0	4.6e-05	8.87e-05	6.14e-05	0.000206093	0.000247553	0.000181557	0.00139295	0	0	0.000201864	0.00139146
ZOTU14034	0	0	0	0	0	0	0	0	0	0	0	0	0	0	0	0	0	0	0	0	0	0.000910194	0.00301077	0.000182869	0	0	0	0	0	0	0	0	0	0	0	0	0	0	0	0	0	0	0	0	0	0	0	0	0
ZOTU14380	0	2.09e-05	0	0	0	0	0	0.000155347	3.8e-05	0	0	0	0	0	0	0	0	0	0	0	0	0	0	0	0	0	0	0	0	9.02e-05	2.33e-05	3.38e-05	0	0	0	7.9e-05	0	0.00031322	0.000345288	0.000687087	0.000490878	0.000412186	0.000342766	0.00116499	0.000766123	0	0	0.000238567	0
ZOTU12274	1.33e-05	2.09e-05	0	0	0.000414409	0.000612813	0.00087382	0.000189868	0	0	0	0	0	0	0	0	3.39e-05	0	0	0	0	0	1.64e-05	0	0	0	0	0.000152829	0.000454285	0.000433135	0.00025662	0.000337598	9.9e-05	0	0.000126842	3.95e-05	0	0	0	0	0	0	0	0	0	0	0	0	0
ZOTU12769	0	0	0	0	1.59e-05	0	0.000109228	8.63e-05	0.000285328	0	0	0	0	0	0	0	0	0	0	0	0	0	0	0	0	0	0	0	0	3.61e-05	0	0.000270079	0	0	0	0	0.000258398	5.53e-05	0.000345288	0.000110821	0.000449971	0.000637014	0.000209468	0.000544671	0.000400474	0	0	0.000256918	0
ZOTU7232	0	0	0	0	0	0	2.18e-05	3.45e-05	0	0	0	0	0	0	0	0	0	0	0	0	0	0	0	0	0	0	0	1.91e-05	0	0	2.33e-05	0	0	0	8.46e-05	5.92e-05	0	0	0	6.65e-05	4.09e-05	0	0	6.05e-05	0.0027859	0	0	0.000862512	0
ZOTU4599	5.33e-05	0	0	0	0.000302837	1.39e-05	0	0	0	0	0	0	0	0	0	0	0.0014562	0.000223329	0	0	0	0	0	0	0	0	0	0.000496695	0.000319682	0.000234615	0	0	0.000930527	0	2.11e-05	0	0	0	0	0	0	0	0	0	0	0	0	0	0
ZOTU11433	7.99e-05	0	0	0	0.000207204	6.96e-05	0	1.73e-05	1.9e-05	3.28e-05	0	0	0	0	0	0	8.47e-05	6.87e-05	0	0	0	5.06e-05	0	0	0	0	0	0.0010316	0.000185079	0.000108284	0	3.38e-05	0.00197985	0	6.34e-05	1.97e-05	0	0	0	0	0	0	0	0	0	0	0	0	0
ZOTU12463	0	0	0	0	3.19e-05	0.000125348	0.00019661	0.000569604	0.000589679	0	0	0	0	0	0	0	0	0	0	0	0	0	0	0	0	0	0	1.91e-05	0.000134603	0.000180473	0.000186632	0.000270079	5.94e-05	0.000279708	0.000105702	0.000177687	0.000172265	0.000718563	0.000115096	6.65e-05	0	0	0	3.03e-05	0	0	0	1.84e-05	0
ZOTU11428	7.99e-05	0	0	0	6.38e-05	5.57e-05	2.18e-05	3.45e-05	1.9e-05	0.000180411	0.000223642	0	0	0	0	0	0.000118528	1.72e-05	0	0	0	0	0	0	0	0	0	0.000114622	0.000168254	0.000216567	4.67e-05	6.75e-05	0.0012869	0.000365772	0.000866753	9.87e-05	0	0	0	0	0	0	0	0	0	0	0	0	0
ZOTU8905	0	0	0	0	0	0.000167131	0.000174764	0.000138086	0.000437504	0	0	0	0	0	0	0	0	0	2.2e-05	0	0	0	0	0	0	0	0	0	0	5.41e-05	0.000209962	0.000303838	0	0	8.46e-05	0.000236915	0	0.000257946	0.000506422	0.000243805	0.000449971	0.000618279	0.00110447	3.03e-05	0.000104471	0	0	5.51e-05	0
ZOTU2826	0	0	0	0	3.19e-05	0.000292479	0.000524292	6.9e-05	5.71e-05	0	0	0	0	0	0	0	0	0	0	0	0	0	0	0	0	0	0	0.000229244	0.000538412	0.000415088	0.000349936	0.000135039	0.000158388	0.000279708	0.00067649	0.000118458	0	0.000165822	0	0	0	0	0	0	0	0	0	0	0
ZOTU6453	0	0	0	0	0.000159388	0.000320334	0.000283992	0.000224389	9.51e-05	0	0	0	0	0	0	0	0	0	0	0	0	0	0	0	0	0	0	0.000133726	0.000336508	0.000270709	0.000419923	0.000236319	1.98e-05	0	0.000126842	5.92e-05	0.00101206	0.000331644	0	0	0	0	0	0	0	0	0	0	0
ZOTU3230	0	0	0	0	0	1.39e-05	0	1.73e-05	0.000171197	0	0	0	0	0	0	0	0	0	0	0	0	0	0	0	0	0	0	0	0	0	0	3.38e-05	0	0	0	3.95e-05	0	5.53e-05	0.000138115	0.000221641	0.000306799	0.000430921	0.000114255	0.000136168	6.96e-05	0.000142963	0.00301589	0.000146811	0
ZOTU2502	1.33e-05	0	0	0	0.000749123	0.000501393	2.18e-05	3.45e-05	0	0	0	0	0	0	0	0	0	1.72e-05	0	0	0	0	0	0	0	0	0	0.000534902	0.000555238	0.000487277	0	3.38e-05	0.000376171	0.000258192	0.000422806	1.97e-05	0	0	0	0	0	0	0	0	0	0	0	0	0
ZOTU11566	0	0	0	0	0	0	0	0.000897558	0.000836963	0	0	0	0	0	0	0	0	0	0	0	0	0	0	0	0	0	0	0	0	9.02e-05	0.000116645	0.000708956	0	0	0	5.92e-05	0.00040913	1.84e-05	0.000161134	0.000398954	0.000245439	5.62e-05	0	0	0	0	0	1.84e-05	0
ZOTU4127	0	0	0	0	0	0	0	0	0	0	0	0	0	0	0	0	0	0	0	0	0	0	0	0	0	0	0	0	0	0	0	0	0	0	0	0	0	0	0	0	0	0	0	1.51e-05	0	0	0	0.00400059	0
ZOTU13808	0	0	0	0	0.000510041	5.57e-05	0	0	0	0	0	0	0	0	0	0	1.69e-05	0	0	0	0	0	0	0	0	0	0	0.00124174	0.00104317	0.000487277	0	0	0.000554357	0	0.000105702	0	0	0	0	0	0	0	0	0	0	0	0	0	0
ZOTU2400	0	0.00361932	0	0	0	0	0	0	0	0	0	0	0	0	0	0	0	0	0	0	0.000749036	0	0	0	0	0	0	0	0	0	0	0	0	0	0	0	0	0	0	0	0	0	3.81e-05	0	0	2.38e-05	0	0	0.000636094
ZOTU4511	4e-05	0.000104605	0	0	6.38e-05	4.18e-05	0	0	0	3.28e-05	0	0	0	0	0	0	3.39e-05	1.72e-05	0	0	0	0	1.64e-05	0	0	0	0	0.000382073	6.73e-05	0.000144378	0	0	0.00166307	0.000344256	0.00105701	0	0	0	0	0	0	0	0	0	0	0	0	0	0
ZOTU2051	0.00054607	0.000167368	0	0	0.000223143	0.00051532	0.000349528	0.000120825	0	0.000213213	0.000601037	0	0	0	0	0	0.000558773	0.00020615	4.4e-05	0	0	8.43e-05	4.91e-05	0	0	0	0	0.000133726	3.37e-05	0	2.33e-05	0	5.94e-05	0	0	0	0	3.68e-05	0	0	4.09e-05	0	0	0	0	0	0	0	0
ZOTU11227	0	0	0	0	0	6.96e-05	0.000109228	0.000362475	0.000190219	0	0	0	0	0	0	0	0	0	0	0	0	0	0	0	0	0	0	0	0	5.41e-05	0.000209962	0.000371358	0	0	0	0.000138201	0	0	0.00029925	0.000243805	2.05e-05	0.000693221	0.000685531	0.000378243	0	0.000428888	0	0.000587242	0.000139146
ZOTU3398	0	0	0	0	0.000876634	0.000153203	0	0	0	6.56e-05	0	0	0	0	0	0	3.39e-05	6.87e-05	0	0	0	0	0	0	0	0	0	0.00141367	0.000235555	0.00019852	0	0	0.000613752	0.000344256	0	0	0	0	0	0	0	0	0	0	0	0	0	0	0
ZOTU2381	0.000159825	0.00380761	0	0	0	0	0	0	0	0	0	0	0	0	0	0	0	0	0	0	0	3.37e-05	0	0	0	0	0	0	0	0	0	0	0	0	0	0	0	0	0	0	0	0	0	0	0	0	0	0	0
ZOTU14369	0	0	0	0	0	9.75e-05	8.74e-05	0.000569604	0.000684788	0	0	0	0	0	0	0	0	0	0	0	0	0	0	0	0	0	0	1.91e-05	6.73e-05	1.8e-05	0.000769859	0.00131663	0	0.000172128	2.11e-05	0.000177687	0	0	0	0	0	0	0	0	0	0	0	0	0
ZOTU12052	0	0	0	0	0	0	0	1.73e-05	7.61e-05	0	0	0	0	0	0	0	0	0	0	0	0	0	0	0	0	0	0	0	0	1.8e-05	7e-05	0	0	0	0	1.97e-05	0	0	0.000161134	0.000243805	6.14e-05	0.00013115	3.81e-05	0.000499281	0.000470121	2.38e-05	0	0.00201864	7.95e-05
ZOTU3695	2.66e-05	0	0	0	0.000334715	0.0004039	0.000611674	0.000103564	7.61e-05	1.64e-05	0	0	0	0	0	0	0.00154086	0.000395121	0	0	0	3.37e-05	1.64e-05	0	0	0	0	0	5.05e-05	0	0.000233291	6.75e-05	3.96e-05	0	0	3.95e-05	0	0	0	0	0	0	0	0	0	0	0	0	0
ZOTU4761	0	0	0	0	0	0	0	0	0	3.28e-05	0	0	0	0	0	0	1.69e-05	0.0017351	0.00151655	0	0	0	0	0	0	0	0	0	0	0	2.33e-05	0	0	0	0	0	0	0	0	0	0.000388612	3.75e-05	0.00022851	0	0	0	0	0	0
ZOTU3397	1.33e-05	0	0	0	0.00138667	0.000181058	4.37e-05	0	0	0	0	0	0	0	0	0	3.39e-05	3.44e-05	0	0	0	0	0	0	0	0	0	0.000554006	0.000185079	0.000252662	0	0	0.0012473	0	4.23e-05	0	0	0	0	0	0	0	0	0	0	0	0	0	0
ZOTU5038	0	0	0	0	0	0.000250696	8.74e-05	0.0004833	0.000741854	0	0	0	0	0	0	0	0	0	0	0	0	0	0	0	0	0	0	0	1.68e-05	9.02e-05	0.000396594	0.000675197	0	0	8.46e-05	0.000750232	0.000710594	0.000460617	6.91e-05	0.000132985	0	0	0	0.000136168	0	0	0	0	0
ZOTU2448	4e-05	8.37e-05	0	0	3.19e-05	0.000153203	0.000327683	0.000155347	9.51e-05	1.64e-05	0	0	0	0	0	0	0	0.000326404	0.000351664	0	0	0	0	0	0	0	0	0	0	0	0.000116645	0	0	0.000753061	0.000126842	9.87e-05	0.00111972	0.000128973	0	4.43e-05	0	0	0	0	0	0	0	0	0
ZOTU2769	1.33e-05	0.000564865	0.00312759	0.000260816	0	0	0	0	0	0	0	0	0	0	0	0	0	0	0	0	0	0	0	0	0	0	0	0	0	0	0	0	0	0	0	0	0	0	0	0	0	0	0	0	0	0	0	0	0
ZOTU7522	0.000306332	6.28e-05	5.35e-05	0	3.19e-05	0.000181058	0.000262146	3.45e-05	1.9e-05	0	0	0	0	0	0	0	0.0013546	0.000463838	2.2e-05	0	0	0	0	0	0	0	0	1.91e-05	0.000185079	0.000108284	2.33e-05	0.000101279	5.94e-05	0.000172128	0.000443946	5.92e-05	0	0	0	0	0	0	0	0	0	0	0	0	0
ZOTU3680	0	0	0	0	0	0	0	0	0	0	0	0	0	0	0	0	0	0	0	0	0	0	0	0	0	0	0	0	0	0	0	0	0	0	0	0	0	0	0	0	0	0	0	0.000363114	0.000139295	0.00016679	0	0.000715701	0
ZOTU4506	0	2.09e-05	0	0	1.59e-05	0.000306407	0.000152919	0.000189868	0.000266307	0	0	0	0	0	0	0	0	1.72e-05	0	0	1.83e-05	3.37e-05	0	0	0	0	0	7.64e-05	0.000201905	0.000108284	0.000466581	0.000371358	3.96e-05	0	8.46e-05	0.000296144	0.00047373	0.000773837	0	0	0	0	0	0	1.74e-05	0	0	0	0
ZOTU12519	0	0	0	0	0	0.000153203	6.55e-05	0.000448779	0.000551635	0	0	0	0	0	0	0	0	0	0	0	0	0	0	0	0	0	0	0	3.37e-05	0.000126331	0.000163303	0.000236319	0	0	0	0.000552803	0	0	0.00029925	0.000354626	0.000490878	0.000299771	0.000247553	0.000378243	0	0	0	9.18e-05	0
ZOTU1872	0	0	0	0	0	0	0	0	0	0	0	0	0	0	0	0	0	0	0	0	0	0.000134844	0.00328894	0.000219443	0.000302257	0	0	0	0	0	0	0	0	0	0	0	0	0	0	0	0	0	0	0	0	0	0	0	0
ZOTU10039	0	0	0	0	0	0	0.000305837	0.000189868	5.71e-05	0	0	0	0	0	0	0	0	0	0	0	0	0	0	0	0	0	0	0	0	5.41e-05	7e-05	0.000101279	0	0.00010758	0	0.000138201	0	0	0.000322269	0.000731415	0.000593144	0.000430921	0.000552234	7.56e-05	0.000104471	0	0	0.000110108	0
ZOTU2960	0.000253057	4.18e-05	0	0	0.000159388	0.000626741	0.000327683	5.18e-05	0	0	0	0	0	0	0	0	3.39e-05	0.00020615	0	0	0	0	0	0	0	0	0	7.64e-05	0.000504762	0.000324851	0.000209962	0	1.98e-05	0.000666997	0.000359385	7.9e-05	0	0	0	0	0	0	0	0	0	0	0	0	0
ZOTU13069	0	0	0	0	1.59e-05	9.75e-05	0.000262146	0.000345214	0.000152175	0	0	0	0	0	0	0	0	1.72e-05	0	0	0	0	0	0	0	0	0	5.73e-05	6.73e-05	0.000234615	0.000933162	0.000472638	1.98e-05	0.000451836	4.23e-05	0.000157944	0.000279931	0.000331644	0	0	0	0	0	0	0	0	0	0	0
ZOTU5045	0	0	0	0	0.00027096	0.000320334	0.000546138	0.000310693	0.000114131	0	0	0	0	0	0	0	0	1.72e-05	0	0	0	0	0	0	0	0	0	0.000114622	0.000168254	0.000270709	0.000349936	0.000472638	1.98e-05	0.000236676	8.46e-05	0.000236915	0	0.000202672	9.21e-05	8.87e-05	0	0	0	0	0	0	0	1.84e-05	0
ZOTU7382	1.33e-05	2.09e-05	0	0	3.19e-05	0.000153203	0	0.000431518	0.000190219	0	0	0	0	0	0	0	0	0.000240509	6.59e-05	0	0	0	0	0	0	0	0	9.55e-05	0.000353333	0.000342898	2.33e-05	0.000371358	3.96e-05	0.000172128	0.000147982	0.000157944	0.000258398	0	0.000184154	0.000243805	0	0.000206093	0.000190425	0	0	0	0	0	0
ZOTU4129	0	0	0	0	0	0	0	5.18e-05	3.8e-05	0	0	0	0	0	0	0	0	0	0	0	0	0	0	0	0	0	0	0	0	1.8e-05	0	0	0	0	0	1.97e-05	0	0	0.000483403	0.000310297	0	0	0	0.00299569	0.000452709	2.38e-05	0	0.00042208	0
ZOTU7551	0	4.18e-05	0	0	0	0.000111421	0.00043691	0.000362475	0.000228263	0	0	0	0	0	0	0	0	5.15e-05	2.2e-05	0	0	0	0	0	0	0	0	1.91e-05	6.73e-05	7.22e-05	0.000466581	0.000675197	9.9e-05	0	0.000190263	0.000256658	0	0.000829111	0	0	0	0	0	0	0	0	0	0	0
ZOTU4007	0	0.000188288	0	0	0	0	0	3.45e-05	0.000152175	0	0	0	0	0	0	0	0	0	0	0	0	0	0	0	0	0	0	0	0	0	0	0	0	0	0	3.95e-05	0	1.84e-05	0.000506422	0.000620595	0.000286345	0.000149886	0.000209468	0.000302595	0.00111436	7.15e-05	0	0.000146811	0
ZOTU7327	0	0	0	0	3.19e-05	0.000139276	0.00043691	0.000120825	0.000133153	0	0	0	0	0	0	0	0	0	0	0	0	0	0	0	0	0	0	0	1.68e-05	0.000108284	2.33e-05	6.75e-05	0	0	0	0.000236915	0.000344531	0.000165822	0	0.000177313	0.000102266	0	0	0.000211816	0	0	0	0.00027527	0.00133182
ZOTU6396	0	0	0	0	0	0	0	0	1.9e-05	0	0	0	0	0	0	0	0	0	0	0	0	0	0	0	0	0	0	0	0	0	0	0	0	0	0	0	0	0	0.000437365	0.000820072	0.000879489	0.000693221	0.000571276	0	0	0.000190617	0	0.000311972	0
ZOTU1919	0	0	0	0	0	0	0	0	0	0.0034278	0.000489216	0	0	0	0	0	0	0	0	0	0	0	0	0	0	0	0	0	0	0	0	0	0	0	0	0	0	0	0	0	0	0	0	0	0	0	0	0	0
ZOTU12724	0	0	0	0	4.78e-05	4.18e-05	0.000589829	0.000276172	5.71e-05	0	2.8e-05	0	0	0	0	0	1.69e-05	3.44e-05	0	0	0	5.06e-05	1.64e-05	0	0	0	0	1.91e-05	1.68e-05	0.000162426	0.000863175	0.000405118	0	0.0005379	0.000253684	0.000296144	0	0.000202672	0	0	0	0	0	0	0	0	0	0	0
ZOTU13516	0	0	0	0	3.19e-05	0.000139276	0.000371374	8.63e-05	0	0	0	0	0	0	0	0	0	0	0	0	0	0	0	0	0	0	0	5.73e-05	0.000252381	0.000144378	0.000139974	0.000135039	3.96e-05	0	0	0	0	0	0.00087473	0.000642759	0.000654504	1.87e-05	0.000323723	0	0	0	0	0	0
ZOTU10687	0.000359607	8.37e-05	0	0	1.59e-05	0.000139276	0.000655365	0.00024165	0.000171197	0.000360821	4.19e-05	0	0	0	0	0	0.000152393	0.000652809	0.000153853	0	0	0	0	0	0	0	0	0	1.68e-05	1.8e-05	0.000186632	0	0	0	0	7.9e-05	0.000452196	0	6.91e-05	0	6.14e-05	0	0	0	0	0	0	0	0
ZOTU3691	0	0	0	0	0	0	0	0	0	0	0	0	0	0	0	0	0	0	0	0	0	0	0	0	0	0	0	0	0	0	0	0	0	0	0	0	0	0	0	0	0	0	0	0	0	0.000262098	0.00426638	0	0
ZOTU6942	0	0	0	0	0.000478164	0.000473538	0.000218455	0.000120825	3.8e-05	0	0	0	0	0	0	0	0	0.000240509	0	0	0	1.69e-05	0	0	0	0	0	3.82e-05	0.000588889	0.000306804	0.000536568	0.000202559	7.92e-05	0.00010758	0.000401666	3.95e-05	0	1.84e-05	0	0	0	0	0	0	0	0	0	0	0
ZOTU8939	1.33e-05	0	0	0	0.000621613	0.000111421	0	0	0	0	0	0	0	0	0	0	1.69e-05	5.15e-05	0	0	0	0	0	0	0	0	0	0.00141367	0.000454285	0.000342898	2.33e-05	0	0.000811737	0	4.23e-05	0	0	0	0	0	0	0	0	0	0	0	0	0	0
ZOTU12233	0	0.000104605	0	0	7.97e-05	0.000389972	0.000655365	0.000379736	0.000437504	0	0	0	0	0	0	0	0	3.44e-05	2.2e-05	0	0	0	0	0	0	0	0	1.91e-05	5.05e-05	0.000342898	0.000373265	0.000270079	0	0	4.23e-05	0.00033563	0.000452196	0.000423768	0.000138115	8.87e-05	8.18e-05	0.000112414	3.81e-05	0	0	0	0	0	0
ZOTU4458	0	0	0	0	0.000382531	0.000167131	0	0	0	0	0	0	0	0	0	0	0	0	0	0	0	0	0	0	0	0	0	0.000955183	0.000302857	0.000776033	0	0	0.0012671	0	2.11e-05	0	0	0	0	0	0	0	0	0	0	0	0	0	1.99e-05
ZOTU2397	0	0	0	0	0	0	0	0	0	0	0	0	0	0	0	0	0	0	0	0	0	0	0	0	0	0	0	0	0	0	0	0	0	0	0	0	0	0	0	0	0	0	0	0.000121038	0.000261178	0	0	0.000183513	0.00331962
ZOTU2577	0	0	0	0	0	0	0	0	0	0	0	0	0	0	0	0	0	0	0	0	0	0	0	0	0	0	0	0	0	1.8e-05	0	0	0	0	0	3.95e-05	0	0	6.91e-05	0	2.05e-05	0	0	0.000998563	0	0	0	0.00273435	0
ZOTU7060	0	0	0	0	0.000446286	4.18e-05	0	0	0	0	0	0	0	0	0	0	0	0	0	0	0	0	0	0	0	0	0	0.00124174	6.73e-05	0.000180473	0	0	0.00190065	0	0	0	0	0	0	0	0	0	0	0	0	0	0	0	0
ZOTU3685	0	0	0	0	0	0	0	0	0	0	0	0	0	0	0	0	0	0	0	0	0	0.000151699	0.000752692	0.000256016	0.000470177	0.00222382	0	0	0	0	0	0	0	0	0	0	0	0	0	0	0	0	0	0	0	0	0	0	0
ZOTU3246	0	0	0	0	0	0	0	0	0	0	0	0	0	0	0	0	0	0	0	0	0	0	0	0	0	0	0	0	0	0	0	0	0	0	0	0	0	0	0	0	0	0	0	0	0	0.00159642	0.00154472	0	0
ZOTU10509	0.000119869	0.000125526	0	0	0.000159388	0.000292479	0.000415065	8.63e-05	1.9e-05	8.2e-05	0	0	0	0	0	0	6.77e-05	0.000137433	0.000241769	0	0	3.37e-05	0	0	0	0	0	0.000133726	5.05e-05	5.41e-05	9.33e-05	0.000135039	3.96e-05	0.000860641	0.000422806	0.000138201	0	0	0	2.22e-05	6.14e-05	5.62e-05	0	0	1.74e-05	0	0	0	0
ZOTU7359	0	0	0	0	0.000318776	0.000125348	0.000305837	0.000207129	9.51e-05	1.64e-05	9.78e-05	0	0	0	0	0	0	0.000120254	0.00021979	0	0	0	0	0	0	0	0	3.82e-05	0.000100952	0.000162426	0.000233291	0.000101279	0.000118791	0.000623965	0.000338245	9.87e-05	0.00047373	0	6.91e-05	0	0	0	0	0	0	0	0	0	0
ZOTU6880	0	0	0	0	0	4.18e-05	0.000174764	0.000345214	0.000665766	0	0	0	0	0	0	0	1.69e-05	0	0	0	0	0	0	0	0	0	0	1.91e-05	0	0.00019852	0.000279949	0.000438878	0	0	0.000147982	0.000513317	0	0.00173192	0	0.000110821	0	0	0	4.54e-05	0	0	0	5.51e-05	0
ZOTU4547	0	0	0	0	0	0	0	0	0	0	0	0	0	0	0	0	0	0	0	0	0	0	0	0	0	0	0	0	0	0	0	0	0	0	0	0	0	0	0	0	0	0	0	0.000211816	0	0.00204913	0	0.000311972	0.00067585
ZOTU3163	0	0	0	0	0	0	0	0	3.8e-05	0	0	0	0	0	0	0	0	0	0	0	0	0	0	0	0	0	0	0	0	0	0	3.38e-05	0	0	0	5.92e-05	0	0	0	0	0	1.87e-05	0	0.00119525	0.000470121	0	0	0.001358	0.000278291
ZOTU8213	0	0	0	0	0	5.57e-05	0.000305837	0.000224389	0.000608701	0	0	0	0	0	0	0	0	0	0	0	0	0	0	0	0	0	0	0	0	0.00019852	7e-05	0.000236319	0	0	0	0.000138201	0	7.37e-05	0.000897749	0.000310297	0.000306799	0	0.000304681	0.000847265	0	0	0	0.000183513	0
ZOTU11276	0	2.09e-05	0	0	0.000892573	0.000292479	0	3.45e-05	0	0	0	0	0	0	0	0	0	0	0	0	0	0	0	0	0	0	0	0.00101249	0.000588889	0.000306804	0	0	0.000653349	0	4.23e-05	0	0	0	0	0	0	0	0	0	0	0	0	0	0
ZOTU5409	0	0	0	0	0.000302837	8.36e-05	0.000305837	0	0	0	0	0	0	0	0	0	1.69e-05	0	4.4e-05	0	0	0	0	0	0	0	0	0.000152829	8.41e-05	0.000126331	4.67e-05	6.75e-05	0.000138589	0.000516384	0.0016278	0	0.000322997	0	0	0	0	0	0	0	0	0	0	0	0
ZOTU4959	0	0	0	0	0	0	0	0	0	0	0	0	0	0	0	0	0	0	0	0	0	0	0	0	0	0	0	0	0	0	0	0	0	0	0	1.97e-05	0	0	0	0	0	0	0	0	0	0.00440802	0	0.000146811	0.000159024
ZOTU3760	1.33e-05	0.000753154	2.67e-05	0	0	0	0	0	0	0	0	0	0	0	0	0	0	0	0	0	0	1.69e-05	0	0	0	0	0	0	0	0	0	0	0	0	0	0	0	0	0	0	0	0	0	0	0	0.00243036	0	0	0
ZOTU10691	0	0	0	0	0	0	0	0.000189868	0.000228263	0	0	0	0	0	0	0	0	0	0	0	0	0.00104504	0	0	0	0	0	0	0	0	0	0.000270079	0	0	2.11e-05	0.000493574	0.000107666	0.000644864	0.000115096	0.000421118	0.000184079	0.000112414	0	0	0	0	0	0	0
ZOTU7817	0	0	0	0	4.78e-05	0.000111421	0.000240301	0.000276172	0.000228263	0	0	0	0	0	0	0	0	0	0	0	0	0	0	0	0	0	0	0	1.68e-05	1.8e-05	0.000163303	0.000405118	0	0	0.000190263	9.87e-05	0.000258398	0.00086596	0.000184154	0.000354626	0.000184079	0	0	0.000151297	0	0	0	3.67e-05	0
ZOTU13522	0	0	0	0	0.000350653	0.000626741	2.18e-05	3.45e-05	5.71e-05	0	0	0	0	0	0	0	0	0.000274867	0	0	0	0	0	0	0	0	0	0.000191037	0.000975872	0.000776033	7e-05	0	0.000296977	0	0.000147982	0	0	0	0	0	0	0	0	0	0	0	0	0	0
ZOTU12150	0	4.18e-05	0	0	0	5.57e-05	6.55e-05	5.18e-05	0.000228263	0	0	0	0	0	0	0	0	0	0	0	0	0	0	0	0	0	0	0	0	1.8e-05	0.000116645	3.38e-05	0	0	2.11e-05	1.97e-05	0	3.68e-05	0.000529442	0.000310297	0.000838583	0.00110541	0.000723617	0.000287465	0	0	0	0.000146811	0
ZOTU4975	0	0	0	0	0	2.79e-05	6.55e-05	0.000189868	0.00030435	0	0	0	0	0	0	0	0	0	0	0	0	0	0	0	0	0	0	0	0	3.61e-05	0.000186632	0.000135039	0	0	0	9.87e-05	0.000172265	0.000202672	0.000207173	0.000177313	0.000163626	7.49e-05	0.000418936	0.000347984	5.22e-05	0	0	0.000385378	0
ZOTU2518	0	0	0	0	0	0	0	0	0.000133153	0	0	0	0	0	0	0	0	0	0	0	0	0	0	0	0	0	0	0	0	0	0	0	0	0	0	1.97e-05	0	0	0	0	0	0	0	0.000242076	0	0.000405061	0	0.000165162	0
ZOTU2295	1.33e-05	0	0	0	0.00109978	8.36e-05	2.18e-05	0	0	9.84e-05	0	0	0	0	0	0	3.39e-05	1.72e-05	0	0	0	0	0	0	0	0	0	0.000343866	3.37e-05	7.22e-05	0	0	0.00197985	0	0	0	0	0	0	0	0	0	0	0	0	0	0	0	0
ZOTU10033	4e-05	2.09e-05	0	0	7.97e-05	0.000222841	0.000524292	8.63e-05	7.61e-05	0	0	0	0	0	0	0	0	5.15e-05	0	0	0	0	0	0	0	0	0	0	0.000100952	7.22e-05	0.000909833	0.00121535	0	0.000172128	0	0	0.000215332	0	0	0	0	0	0	0	0	0	0	0	0
ZOTU8527	1.33e-05	0	0	0	3.19e-05	0.000194986	0.000218455	0.00024165	0.000114131	0	0	0	0	0	0	0	0	0	0	0	0	0	0	0	0	0	0	3.82e-05	0.000100952	9.02e-05	0.000116645	0.000202559	5.94e-05	0.000989737	0.000380526	0.000256658	0.000624462	0	0	6.65e-05	0	0	0	4.54e-05	0	0	0	0	0
ZOTU2950	0	4.18e-05	0	0	0	0	0	0	0	0.000278817	0.000880589	0.000158311	0.001302	0	0	0	0	0	0	0	0	0.000893339	0.00022908	0	0	0	0	0	0	0	0	0	0	0	0	0	0	0	0	0	0	0	0	0	0	0	0	0	0
ZOTU11188	0	0	0	0	0	0	0	0	0	4.92e-05	0.000251597	0	0.00347947	0	0	0	0	0	0	0	0	0	0	0	0	0	0	0	0	0	0	0	0	0	0	0	0	0	0	0	0	0	0	0	0	0	0	0	0
ZOTU5054	4e-05	0	0	0	0.000334715	4.18e-05	0	3.45e-05	0	3.28e-05	0	0	0	0	0	0	0.000101595	0	0	0	0	0	0	0	0	0	0	9.55e-05	0.00021873	0.000162426	0.000116645	0	0.000197985	0.0010758	0.00126842	5.92e-05	0	0	0	0	0	0	0	0	0	0	0	0	0
ZOTU2060	0	0	0	0	0	0.000222841	0.000174764	0.000500561	0.00030435	0	0	0	0	0	0	0	0	3.44e-05	6.59e-05	0.000255664	0.000109615	0	0	0	0	0	0	3.82e-05	0.000100952	0.000180473	0.000373265	0.000202559	1.98e-05	0.000344256	0.000147982	0.000631774	0.000452196	0.000350069	2.3e-05	0	0	0	0	3.03e-05	0	0	0	0	0
ZOTU2327	0.000253057	2.09e-05	0	0	0	0	0	0	0	0.000262416	0	0.00223218	0	0	0	0	0.000592638	0.000309225	8.79e-05	0	0	0	0	0	0	0	0	0	0	0	0	0	0	0	0	1.97e-05	0	0	0	0	0	0	0	0	0	0	0	0	0
ZOTU10833	0	0	0	0	0.000510041	9.75e-05	0	0	0	0	0	0	0	0	0	0	0	1.72e-05	0	0	0	0	0	0	0	0	0	0.000171933	6.73e-05	0.00258076	0	0	0.000118791	0	0.000211403	0	0	0	0	0	0	0	0	0	0	0	0	0	0
ZOTU2190	0	6.28e-05	0	0	0.00092445	0.000473538	0	1.73e-05	0	0	0	0	0	0	0	0	1.69e-05	0.000343584	0	0	0	0	0	0	0	0	0	0.000554006	0.000252381	0.00019852	0	0	0.000356372	0	0.000507367	5.92e-05	0	0	0	0	0	0	0	0	0	0	0	0	0
ZOTU8318	0	0	0	0	0	0.000139276	0.000131073	0.000103564	0.000551635	0	0	0	0	0	0	0	0	0	0	0	0	0	0	0	0	0	0	0	0	0.000108284	9.33e-05	0.000371358	0	0	0	0.000296144	0.000107666	0.000147398	0.00029925	0.000443282	0.000286345	0.000355979	0.000418936	0.000151297	0	0	0	0.000477134	0
ZOTU10916	5.33e-05	0.000167368	0	0	0.000478164	0.000194986	0.00019661	0.000258911	5.71e-05	3.28e-05	0	0	0	0	0	0	1.69e-05	0.000223329	0.000197811	0	0	6.74e-05	0	0	0	0	0	0.000114622	6.73e-05	9.02e-05	4.67e-05	0.000101279	3.96e-05	0	8.46e-05	7.9e-05	0.000279931	0.000626439	0	0	0	0	0	0	0	0.000285925	0	0	0
ZOTU11678	0.000399563	0.000209209	0	0	0.000143449	6.96e-05	0.000677211	0.000103564	9.51e-05	0.00016401	1.4e-05	3.17e-05	0	0	0	0	0.000507975	0.000171792	0.000263748	0	0	0	0	0	0	0	0	3.82e-05	0.000151428	0.00019852	7e-05	0	9.9e-05	0	0	3.95e-05	0.000236865	5.53e-05	0	0	0	0	0	0	0	0	0	0	0
ZOTU9926	5.33e-05	0	0	0	7.97e-05	0.000236769	0.000677211	0	3.8e-05	0	0	0	0	0	0	0	0	1.72e-05	2.2e-05	0	0	0	0	0	0	0	0	0	3.37e-05	1.8e-05	0.000163303	3.38e-05	0	0.00195796	0.000169122	0.000236915	0	0	0	2.22e-05	0	0	0	0	0	0	0	0	0
ZOTU6941	0	0	0	0	0.000223143	6.96e-05	0	0	0	0	0	0	0	0	0	0	1.69e-05	1.72e-05	0	0	0	0	1.64e-05	0	0	0	0	0.00217782	0.000151428	0.000234615	0	0	0.000851333	0	0	0	0	0	0	0	0	0	0	0	0	0	0	0	0
ZOTU9491	0	0	0	0	0.000175327	6.96e-05	0	0	0	3.28e-05	0	0	0	0	0	0	0	0	0	0	0	0	0	0	0	0	0	0.0010316	0.000185079	0.000559466	0	0	0.00170267	0	0	0	0	0	0	0	0	0	0	0	0	0	0	0	0
ZOTU2968	0.000279694	0.000355656	0	0	3.19e-05	0.000167131	4.37e-05	1.73e-05	0	0	0	0	0	0	0	0	0.000186258	1.72e-05	0	0	0	0.00121359	0.00022908	0	0	0	0	9.55e-05	0.000235555	0.000360946	0.000139974	0	7.92e-05	8.61e-05	0.000169122	0	0	0	0	4.43e-05	0	0	0	0	0	0	0	0	0
ZOTU7899	1.33e-05	0	0	0	4.78e-05	0.000292479	6.55e-05	3.45e-05	1.9e-05	0	0	0	0	0	0	0	0	0.00020615	0	0	0	0	0	0	0	0	0	0	8.41e-05	0.000252662	0.000209962	6.75e-05	1.98e-05	0.000559416	0.000486227	0.000691003	0.000538329	0.000110548	0	4.43e-05	0	0	0	0	0	0	0	0	0
ZOTU12177	0	0	0	0	0	5.57e-05	6.55e-05	0.000431518	0.000551635	0	0	0	0	0	0	0	0	0	0	0	0	0	0	0	0	0	0	0	0	0.000144378	0.000279949	0.000135039	0	0	0	0.000454088	0.000258398	0.000552741	2.3e-05	8.87e-05	2.05e-05	0	0.00015234	0.000226946	0	0.000309752	0	0.000605593	1.99e-05
ZOTU5641	2.66e-05	0	0	0	0.00012751	0.000194986	0.000152919	5.18e-05	0	0	0	0	0	0	0	0	1.69e-05	5.15e-05	0	0	0	0	0	0	0	0	0	0.000114622	0.000420635	0.00019852	0.000209962	0	0.000455364	0.00105429	0.000507367	0.000157944	0	0	0	0	0	0	0	0	0	0	0	0	0
ZOTU2282	0	0	0	0	0	1.39e-05	0	0	0	0	0	0	0	0	0	0	0	0	0	0	0	0	0	0	0	0	0	0	0	0	0	0	0	0	0	0	0	0	0	0	0	0	7.62e-05	0	0	0	0	0	0
ZOTU4170	0	0	0	0	0	0.000111421	0.000327683	0.00103564	0.000760876	0	0	0	0	0	0	0	0	0	0	0	0	0	0	0	0	0	0	0	0	0.00019852	0.000466581	0.000843996	0	0	2.11e-05	1.97e-05	0	0.000128973	0.000345288	0.000177313	0	0	0	0	1.74e-05	0	0	0	0
ZOTU11744	0	0	0	0	1.59e-05	0	6.55e-05	0.000517822	0.000228263	0	0	0	0	0	0	0	0	0	4.4e-05	0	0	0	0	0	0	0	0	0	0	0	0.000373265	0.000371358	0	0	0	7.9e-05	0.000193798	0	0.000184154	0.000531938	0.000102266	0.000149886	0	0.000196687	0	0	0	0.000183513	0.000496949
ZOTU13888	0	2.09e-05	0	0	0	0.000111421	6.55e-05	0.000189868	0.000228263	0	0	0	0	0	0	0	0	0	2.2e-05	0	0	0	0	0	0	0	0	0	1.68e-05	7.22e-05	9.33e-05	3.38e-05	0	0	2.11e-05	0.000138201	0.000193798	0	0.000460384	0.00048761	0.000613597	0.000487129	0.000209468	0.000499281	0.000104471	2.38e-05	0	0.000220216	0.000119268
ZOTU3158	1.33e-05	0	0	0	0.000892573	0.000167131	0	0	0	0	0	0	0	0	0	0	0	6.87e-05	0	0	0	0	0	0	0	0	0	0.00108891	0.000386984	0.000342898	0	0	0.00077214	0	0	0	0	0	0	0	0	0	0	0	0	0	0	0	0
ZOTU2499	0	0	0	0	0	0.000111421	0.000131073	8.63e-05	0.000665766	0	0	0	0	0	0	0	0	6.87e-05	0	0	0	0	0	0	0	0	0	0	1.68e-05	3.61e-05	4.67e-05	0.000236319	0	0.00142006	0.000549648	0.000236915	4.31e-05	0	2.3e-05	4.43e-05	0	0	0	1.51e-05	0	0	0	0	0
ZOTU2305	0	0	0	0	0	0	0	0	0	0	0	0	0	0	0	0	0	0	0	0	0	0	0	0	0	0	0	0	0	0	0	0	0	0	0	0	0	0	0	0	2.05e-05	0	0	0	0	0	0.000122597	0	3.98e-05
ZOTU4212	0	0	0	0	1.59e-05	0.000473538	0.000152919	0.000500561	0.000513591	0	0	0	0	0	0	0	0	1.72e-05	0	0	0	0	0	0	0	0	0	0	3.37e-05	0.00019852	0.000209962	0.000236319	0	0	0	0.000355373	0	0.000165822	6.91e-05	0.000953056	0	0	0	0.000272335	0	4.77e-05	0	0.000110108	0
ZOTU14328	6.66e-05	0.000125526	0	0	0.000494103	0.0004039	4.37e-05	1.73e-05	0	9.84e-05	0	0	0	0	0	0	0.000169325	0.000463838	2.2e-05	0	0	0	0	0	0	0	0	7.64e-05	6.73e-05	0.000216567	2.33e-05	0.000135039	0.000197985	0	0.000126842	0.000256658	0	0.000350069	9.21e-05	4.43e-05	8.18e-05	0.000149886	0	0	0	0	0	0	0
ZOTU10365	0	0	0	0	0.000255021	0.000348189	0.000240301	0.000103564	3.8e-05	0	0	0	0	0	0	0	0.000423313	6.87e-05	0	0	0	1.69e-05	0	0	0	0	0	0.000191037	0.000235555	0.00019852	0.00025662	0.000270079	5.94e-05	0	0.000443946	9.87e-05	0.000193798	0	4.6e-05	0.000199477	0	1.87e-05	0	1.51e-05	0	0	0	0	0
ZOTU10371	0.00054607	8.37e-05	0	0	0.000159388	9.75e-05	0.000109228	1.73e-05	7.61e-05	0.000426425	2.8e-05	0	0	0	0	0	0.000931288	0.000429479	0	0	0	0	0	0	0	0	0	0.000286555	0.000235555	9.02e-05	2.33e-05	3.38e-05	9.9e-05	0	0	1.97e-05	0	0	0	2.22e-05	0	0	0	0	0	0	0	0	0
ZOTU4472	1.33e-05	0	0	0	0.000765062	0.000473538	0	0	0	0	0	0	0	0	0	0	0	6.87e-05	0	0	0	0	0	0	0	0	0	0.000878768	0.000504762	0.000776033	0	3.38e-05	0.000197985	0	0	0	0	0	0	0	0	0	0	0	0	0	0	0	0
ZOTU11237	0	0	0	0	1.59e-05	9.75e-05	2.18e-05	0	3.8e-05	0	0	0	0	0	0	0	0	0	4.4e-05	0	0	0	1.64e-05	0	0	0	0	3.82e-05	0	0.000180473	0.000279949	0	0.000277178	0.00217312	0.000486227	3.95e-05	0	0	0	0	0	0	0	0	0	0	0	0	0
ZOTU12959	2.66e-05	2.09e-05	0	0	0.000239082	0.000153203	0.000262146	0.000172607	9.51e-05	0	0	0	0	0	0	0	1.69e-05	0.000120254	0.000263748	0	0.000310576	6.74e-05	0	0	0	0	0	0	0.00021873	0.00019852	0.000233291	0.000202559	9.9e-05	0	8.46e-05	0.000138201	0.000452196	0.000202672	4.6e-05	4.43e-05	2.05e-05	1.87e-05	0	0	0	0	0	0	0
ZOTU4108	0	0	0	0	0	0	0	0	0	0	0	0	0	0	0	0	0	0	0	0	0	0	0	0.000182869	0	0.0035239	0	0	0	0	0	0	0	0	0	0	0	0	0	0	0	0	0	0	0	0	0	0	0
ZOTU4654	0	2.09e-05	0	0	0.000302837	4.18e-05	0	0	0	0	0	0	0	0	0	0	0	0	0	0	0	0	0	0	0	0	0	0.00110801	0.000487936	0.000324851	2.33e-05	0	0.0012473	0	0.000147982	0	0	0	0	0	0	0	0	0	0	0	0	0	0
ZOTU4502	0	0	0	0	4.78e-05	5.57e-05	0.00126704	0.000258911	3.8e-05	0	0	0	0	0	0	0	0	0	0	0	0	0	0	0	0	0	0	1.91e-05	0.000168254	0.000108284	0.000513239	0.000270079	0	2.15e-05	0.000126842	0.000118458	0.000559862	0.000128973	0	0	0	0	0	0	0	0	0	0	0
ZOTU11948	0	0	0	0	3.19e-05	6.96e-05	0.000349528	0.000189868	0.000171197	0	0	0	0	0	0	0	0	0	6.59e-05	2.84e-05	0.000109615	0	0	0	0	0	0	3.82e-05	0.000168254	0.000216567	0.000629885	0.000405118	0	4.3e-05	8.46e-05	0.000296144	0.00040913	0.000165822	0	2.22e-05	2.05e-05	0.000149886	0	0	0	0	0	3.67e-05	0
ZOTU11378	0	0	0	0	0	2.79e-05	0	0.000327954	0.000646744	0	0	0	0	0	0	0	0	0	0	0	0	0	0	0	0	0	0	0	0	0	0.000139974	0.000168799	0	0	0	9.87e-05	0	0.00106863	0.000138115	0.000265969	0.000634051	0.000149886	0	3.03e-05	0	0	0	0	0
ZOTU14353	0	0	0	0	0	0	2.18e-05	0.000103564	7.61e-05	0	0	0	0	0	0	0	0	0	0	0	0	0	0	0	0	0	0	0	0	0	7e-05	6.75e-05	0	0	0	1.97e-05	0	0.000184247	4.6e-05	4.43e-05	0.000184079	0.000299771	0.000133298	0.000302595	0.000104471	0.00016679	0	7.34e-05	0.0015306
ZOTU2681	0	0	0	0	0	0	0	0	0	0	0	0	0	0	0	0	0	0	0	0	0	0	0	0	0	0	0	0	0	0	0	0	0	0	0	0	0	0	0	0	0	0	0	0	0.0033605	0	0	0.000128459	0.000198779
ZOTU5062	0	2.09e-05	0	0	0.000494103	0.0004039	0.000218455	0.000293432	3.8e-05	0	0	0	0	0	0	0	0	0.000171792	0	0	0	0	0	0	0	0	0	0.000554006	0.000269206	0.000270709	0.000163303	0.000405118	0.000158388	2.15e-05	0.000105702	9.87e-05	0	0	0	0	0	0	0	0	0	0	0	0	0
ZOTU12454	1.33e-05	2.09e-05	0	0	0.000366592	0.000278552	0	1.73e-05	0	0.000147609	4.19e-05	0	0	0	0	0	6.77e-05	0.000377942	6.59e-05	0	0	0	0	0	0	0	0	0.000706835	0.000605714	0.000216567	9.33e-05	0.000101279	0.000237581	0	0.000147982	0.000177687	0	0	0	0	0	0	0	0	0	0	0	0	0
ZOTU2909	0	0.0023013	8.02e-05	0	0	0	0	0	0	0	0	0	0	0	0	0	0	0	0.000505517	0	0	0	0	0	0	0	0	0	0	0	0	0	0	0	0	0	0	0	0	0	0	0	0	0	0	0.000238271	0	0	0
ZOTU3093	0	0	0	0	0	8.36e-05	4.37e-05	0.000189868	0.000247285	0	0	0	0	0	0	0	0	1.72e-05	8.79e-05	0	0	0	0	0	0	0	0	1.91e-05	0	9.02e-05	0.000186632	0.000270079	0	0	2.11e-05	0.000217172	0.00088286	0.00103178	2.3e-05	0	0	0	0	0	0	0	0	0	0.000258413
ZOTU2906	0	0	0	0	0.000478164	0.000111421	0	0	1.9e-05	1.64e-05	0	0	0	0	0	0	3.39e-05	0.000103075	0	0	0	0	0	0	0	0	0	0.000554006	3.37e-05	0.000162426	0	0	0.00108891	0	0	0	0.000366064	0.000700138	0	0	0	0	0	0	0	0	0	0	0
ZOTU2565	0	0	0	0	0	0	0	0	0	0	0	0	0	0	0	0	0	0	0	0	0	0	0	0	0	0	0	0	0	0	0	0	0	0	0	0	0	0	0	0	0	0	0	0	0	0	0.000588466	0	0
ZOTU4382	0	2.09e-05	0	0	0	0.000320334	0.000393219	0.000310693	9.51e-05	0	0	0	0	0	0	0	0	0	0	0	0	0	0	0	0	0	0	3.82e-05	0.000100952	0.000216567	0.000513239	0.000405118	7.92e-05	0.00021516	4.23e-05	0.000157944	0.000129199	0.000386918	0.000115096	0	0	0	0	1.51e-05	8.71e-05	0	0	1.84e-05	0
ZOTU10089	1.33e-05	6.28e-05	0	0	0	4.18e-05	0	0	0	1.64e-05	0.000279552	0	0	0	0	0	0	0.000103075	4.4e-05	0	0	0	0	0	0	0	0	0	3.37e-05	0.000126331	0.00293946	0	0	0	0	0	0	0	0	0	0	0	0	0	0	0	0	0	0
ZOTU6062	6.66e-05	0	0	0	0.000892573	0.000278552	0	3.45e-05	1.9e-05	9.84e-05	0	0	0	0	0	0	6.77e-05	8.59e-05	0	0	0	0	0	0	0	0	0	0.00116532	0.000286032	7.22e-05	0	0	0.000277178	0	6.34e-05	1.97e-05	0	0.000202672	0	0	0	1.87e-05	0	0	0	0	0	0	0
ZOTU2859	0	2.09e-05	0	0	0	2.79e-05	0.000109228	0.000345214	0.000266307	0	0	0	0	0	0	0	0	3.44e-05	0.000109895	0	0	0	0	0	0	0	0	0	0	7.22e-05	0.000793188	0.000573917	0	0	0.000211403	0.000809461	0	0.000110548	0.000161134	0	0	0	0	0	0	0	0	0	0
ZOTU2387	0	0	0	0	0	1.39e-05	2.18e-05	0.000103564	0.000114131	0	0	0	0	0	0	0	0	0	0	0	0	0	0	0	0	0	0	0	0	0.000108284	0	0	0	0	0	0	0	0	0.00117398	0.00106388	0.00075677	0.000730693	0.000171383	0	0	0	0	0	0
ZOTU13566	1.33e-05	2.09e-05	0	0	0.000350653	0.000292479	0.000218455	0.000431518	3.8e-05	0	0	0	0	0	0	0	3.39e-05	3.44e-05	0	0	0	0	0	0	0	0	0	0.000267451	0.000319682	0.000108284	0.000536568	0.000405118	0.000296977	0.00021516	4.23e-05	0	0	1.84e-05	0	0	0	0	0	0	0	0	0	0	0
ZOTU6633	0	0	0	0	9.56e-05	0.000167131	0.000655365	0.000586865	0.000190219	0	0	0	0	0	0	0	6.77e-05	1.72e-05	0	0	0	0	0	0	0	0	0	0.000114622	0.000185079	7.22e-05	0.000186632	6.75e-05	0.000197985	0.000172128	0.000105702	0.000355373	0.000236865	0.000165822	0	0	0	0	0	0	0	0	0	0	0
ZOTU12981	0	8.37e-05	0	0	1.59e-05	4.18e-05	8.74e-05	0.000207129	1.9e-05	0	0	0	0	0	0	0	0	5.15e-05	6.59e-05	0	0	0	0	0	0	0	0	1.91e-05	3.37e-05	5.41e-05	0.000303278	0.000101279	0	0	0	0.000296144	0.00167959	0.000571165	0	0	0	0	0	0	0	0	0	0	0
ZOTU11471	0	0	0	0	0	9.75e-05	0	3.45e-05	0.000228263	0	0	0	0	0	0	0	0	0	0	0	0	0	0	0	0	0	0	0	0	3.61e-05	0	6.75e-05	0	0	0	5.92e-05	0	0	0.000138115	0	8.18e-05	0.000168621	0.000171383	0.000317724	0.000174119	0.000548024	0	0.000146811	0.000993897
ZOTU4841	0	0	0	0	0	4.18e-05	0.000109228	5.18e-05	3.8e-05	0	0	0	0	0	0	0	0	0	0	0	0	0	0	0	0	0	0	0	6.73e-05	3.61e-05	0	3.38e-05	0	2.15e-05	0	1.97e-05	0.00221792	0.00027637	0.00027623	0.000221641	0	0	0	0	0.000156707	0	0	5.51e-05	0
ZOTU12288	5.33e-05	0.00154815	0	0	0.00012751	9.75e-05	0.000109228	5.18e-05	1.9e-05	0.000114807	0.000251597	0	0	0	0	0	0	6.87e-05	0.000703328	0	0	1.69e-05	0	0	0	0	0	9.55e-05	3.37e-05	0.000144378	4.67e-05	3.38e-05	0	0	6.34e-05	1.97e-05	0	0	2.3e-05	0	0	0	0	0	0	0	0	0	0
ZOTU4049	0	0	0	0	1.59e-05	0.000181058	8.74e-05	0.000103564	5.71e-05	1.64e-05	0	0	0	0	0	0	1.69e-05	0.000120254	4.4e-05	0	0	0	0	0	0	0	0	7.64e-05	0.000100952	0.000108284	7e-05	0.000101279	5.94e-05	0	0.000211403	0.000276401	0.00180879	0.000165822	0	0	0	0	0	0	0	0	0	0	0
ZOTU2755	0	0	0	0	4.78e-05	0.000389972	0.000109228	3.45e-05	1.9e-05	0	0	0	0	0	0	0	1.69e-05	0	0	0	0	0	0	0	0	0	0	0	0.000117778	0.000144378	0.000559897	0.000303838	0	0	0.000295964	0.000276401	0.000581395	0.000700138	2.3e-05	0	0	0	0	0	0	0	0	0	0
ZOTU2462	0.000692576	0.000167368	0	0	0	0	0	0	0	0.00034442	0.00064297	0	0	0	0	0	0.000897423	8.59e-05	0	0	0	0.000674218	0.00011454	0	0	0	0	0	0	0	0	0	0	0	0	0	0	0	0	0	0	0	0	0	0	0	0	0	0
ZOTU10513	0.000186463	0.000104605	0	0	4.78e-05	0.000194986	0.000218455	0.000172607	3.8e-05	4.92e-05	0	0	0	0	0	0	0.000169325	0.000188971	4.4e-05	0	0	6.74e-05	1.64e-05	0	0	0	0	1.91e-05	8.41e-05	9.02e-05	0.000163303	0.000607677	1.98e-05	0	0.000253684	0.000236915	0.000387597	0.000257946	0	0	0	0	0	0	0	0	0	0	0
ZOTU9506	4e-05	0.000188288	0	0	6.38e-05	0.000473538	0.000371374	0.000138086	5.71e-05	1.64e-05	0	0	0	0	0	0	6.77e-05	0.000171792	6.59e-05	0	0	0	0	0	0	0	0	1.91e-05	0.000168254	0.00019852	0.000396594	0.000168799	1.98e-05	0.000301224	0.000169122	0.00033563	2.15e-05	0.000165822	0	0	0	0	0	0	0	0	0	0	0
ZOTU4868	0	2.09e-05	0	0	0.00039847	0.000167131	2.18e-05	0	0	0	0	0	0	0	0	0	0	0	0	0	0	0	0	0	0	0	0	0.00124174	0.000572063	0.000649702	0	0	0.000118791	0	0.000422806	0	0	0	0	0	0	0	0	0	0	0	0	0	0
ZOTU4589	0	0	0	0	0	0	0	0	0	0	0	0	0	0	0	0	0	0	0	0	0	0	0	0	0	0.00359232	0	1.91e-05	0	0	0	0	0	0	0	0	0	0	0	0	0	0	0	0	0	0	0	0	0
ZOTU12486	0	0	0	0	0.000239082	5.57e-05	0	0	0	0	0	0	0	0	0	0	0	0	0	0	0	0	0	0	0	0	0	0.00149008	0.000319682	0.000288757	0	0	0.00106912	0	0.000126842	1.97e-05	0	0	0	0	0	0	0	0	0	0	0	0	0
ZOTU11412	1.33e-05	0	0	0	3.19e-05	4.18e-05	6.55e-05	6.9e-05	0.000266307	0	0	0	0	0	0	0	0	0	2.2e-05	0	0	0	0	0	0	0	0	0	0	3.61e-05	7e-05	0.000202559	0	4.3e-05	0	0.000217172	4.31e-05	0.000515891	0.000230192	0.00048761	0.000204532	0.00013115	0.000552234	0.000242076	1.74e-05	0	0	0.000605593	1.99e-05
ZOTU11413	0	2.09e-05	0	0	0.000414409	0.000501393	0.000305837	0.000293432	9.51e-05	1.64e-05	0	0	0	0	0	0	5.08e-05	1.72e-05	0	0	0	0	0	0	0	0	0	0.000229244	0.000252381	0.000306804	0.000186632	0.000101279	9.9e-05	0.000301224	0.000190263	7.9e-05	0	5.53e-05	0	8.87e-05	0	0	0	0	0	0	0	0	0
ZOTU13792	2.66e-05	0	0	0	0.000143449	6.96e-05	0.000283992	0.000103564	9.51e-05	0	0	0	0	0	0	0	0	6.87e-05	4.4e-05	0	0	0	0	0	0	0	0	0.000267451	5.05e-05	3.61e-05	0.000163303	0.000337598	7.92e-05	0.000279708	0.000126842	0.000276401	0.000322997	0.00058959	6.91e-05	6.65e-05	0.000102266	0	0	0	0	0	0	0	0
ZOTU2575	0	0	0	0	0	0	0	0	0	0	0	0	0	0	0	0	0	0	0	0	0	0	0	0	0	0	0	0	0	0	0	0	0	0	0	0	0	0	0	0	0	0	0	0	0	0.000381234	0	0	0
ZOTU8108	0	0	0	0	0	1.39e-05	4.37e-05	0.000207129	0.000133153	0	0	0	0	0	0	0	0	1.72e-05	0	0	0	0	0	0	0	0	0	0	3.37e-05	0	0.000116645	0.000337598	0	8.61e-05	0.000401666	0.000513317	0.000925926	0.000497467	2.3e-05	2.22e-05	0	0	0	0	0	0	0	0.000220216	0
ZOTU2647	0	0	0	0	0	0	0	0	0	0	0	0	0	0	0	0	0	0	0	0	0	0	0	0	0	0	0	0	0	0	0	0	0	0	0	0	0	0	0	0	0	0	0	1.51e-05	0	0	0	0	0.000318047
ZOTU3741	0	0	0	0	0	0	0	0.000586865	0.000133153	0	0	0	0	0	0	0	0	0	0	0	0	0	0	0	0	0	0	0	0	0	0	0.000877756	0	0	0	0.000631774	0	0	6.91e-05	0.000177313	4.09e-05	0	0	0.000302595	0	0	0	1.84e-05	0
ZOTU2752	0.000279694	0.000167368	0	0	0.000382531	0.000264624	0.000742747	5.18e-05	1.9e-05	0.000246015	8.39e-05	0	0	0	0	0	0.000152393	0.000171792	4.4e-05	0	0	3.37e-05	0	0	0	0	0	5.73e-05	0	0	2.33e-05	0	0.000118791	4.3e-05	0.000253684	0.000118458	0.000172265	7.37e-05	0	2.22e-05	0	5.62e-05	0	0	0	0	0	0	0
ZOTU8114	0	0	0	0	1.59e-05	0.000222841	8.74e-05	0.000258911	0.00039946	0	0	0	0	0	0	0	0	0	4.4e-05	0	0	0	0	0	0	0	0	0	1.68e-05	5.41e-05	0.000303278	0.000236319	0	0	8.46e-05	0.000414602	0.000366064	3.68e-05	0.00029925	0.000531938	0.000163626	0	0.000209468	6.05e-05	0	0	0	0.000238567	0
ZOTU11493	2.66e-05	0	0	0.000228214	1.59e-05	4.18e-05	0	0	0	0	5.59e-05	0	0	0	0	0	0.00020319	1.72e-05	0	0	0	5.06e-05	1.64e-05	0	0	0	0	7.64e-05	0.000134603	0.000306804	0	0	0.000217783	0	6.34e-05	0	0	0	0	0	0	0	0	0	0	0	0	0	0
ZOTU12036	0	0	0	0	0	0	0	5.18e-05	3.8e-05	0	0	0	0	0	0	0	0	0	0	0	0	0	0	1.83e-05	0	0	0	0	0	0	0	6.75e-05	0	0	0	1.97e-05	0	0	2.3e-05	0.000110821	0.000490878	1.87e-05	0.00108543	0	0.000121883	0	0.00142213	7.34e-05	0
ZOTU13020	0	0	0	0	0	5.57e-05	6.55e-05	0.000103564	0.000361416	0	0	0	0	0	0	0	0	0	0	0	0	0	0	0	0	0	0	0	0	3.61e-05	7e-05	6.75e-05	0	0	6.34e-05	0.000256658	0	0.000184247	0.000115096	0.000199477	0.000204532	0.000243564	0.000361808	0.000529541	0.000261178	0.000500369	2.45e-05	0.000146811	9.94e-05
ZOTU2940	0.000625982	0.000167368	0	0	0	0	0	0	0	0.000246015	2.8e-05	0	0	0	0	0	0.00164245	0.000309225	0	0	0	0	0	0	0	0	0	0	0	0	0	0	9.9e-05	0.00021516	0.000232543	0	0	0	0	0	0	0	0	0	0	0	0	0	0
ZOTU9750	0	0	0	0	0.000175327	2.79e-05	0	1.73e-05	0	0	0	0	0	0	0	0	0	0	0	0	0	0	0	0	0	0	0	0.000362969	0.000252381	0.000126331	0.000116645	0	0.00025738	0.00167825	0.000549648	0	0	0	0	0	0	0	0	0	0	0	0	0	0
ZOTU7286	0	0	0	0	7.97e-05	0.000153203	0.000786438	0.000431518	3.8e-05	0	0	0	0	0	0	0	0	0.000566913	0.000395622	0	0	0	0	0	0	0	0	0	0	3.61e-05	0.00025662	0.000540157	0	0	4.23e-05	0.000236915	0	0	0	0	0	0	0	0	0	0	0	0	0
ZOTU13611	1.33e-05	0.00023013	0	0	0.000191266	0.000111421	0.000152919	0.000345214	0.000152175	3.28e-05	0	0	0	0	0	0	0	3.44e-05	0.00043958	0	0	0	0	0	0	0	0	9.55e-05	0.000235555	3.61e-05	0.000116645	0.000405118	0	0	8.46e-05	0.000118458	0	0.000368494	0.000115096	0.000110821	0.000102266	5.62e-05	0	1.51e-05	0	0	0	0	0
ZOTU6814	0.0002131	0.000251051	0	0	1.59e-05	0	6.55e-05	0	0	0.000180411	2.8e-05	0	0	0	0	0	0.00094822	0.000377942	0.00134072	0	0	6.74e-05	4.91e-05	0	0	0	0	0	0	0	2.33e-05	0	0	0	0	0	0	0	0	0	0	0	0	0	0	0	0	0	0
ZOTU13761	0	0	0	0	0	0	0	0.000189868	0.000190219	0	0	0	0	0	0	0	0	0	0	0	0	0	0	0	0	0	0	0	0	1.8e-05	0.000116645	0.000371358	0	0	4.23e-05	5.92e-05	0	3.68e-05	0.000736614	0.000332462	0.000449971	0.000412186	0.000323723	0.000166427	5.22e-05	0	0	0	5.96e-05
ZOTU12406	0	0	0	0	0	0	0	0.000327954	0.000247285	0	0	0	0	0	0	0	0	0	0	0	0	0	0	0	0	0	0	0	0	0	0	0.000270079	0	0	0	0.000217172	0.000947459	0.000128973	0.000391326	0.000199477	0.000286345	0.000224829	1.9e-05	7.56e-05	0	0	0	0.000220216	0
ZOTU2792	0	0	0	0	0	0	0	0	0	0	0	0	0	0	0	0	0	0	0	0	0	0	0	0	0	0	0	0	0	0	0	0	0	0	0	0	0	0	0	0	0	0	0	0	0.00341273	0.000142963	0	0	0
ZOTU10529	0	0	0	0	0	1.39e-05	8.74e-05	0.000586865	3.8e-05	0	0	0	0	0	0	0	0	0	0	0	0	0	0	0	0	0	0	1.91e-05	0	0	0.000326607	0.000168799	0	0	2.11e-05	0.000414602	0.00139966	0.000479042	0	0	0	0	0	0	0	0	0	0	0
ZOTU11288	0	0	0	0	0.00092445	0.000194986	0	0	0	0	0	0	0	0	0	0	0	1.72e-05	0	0	0	0	0	0	0	0	0	0.000649524	0.000588889	0.00039704	4.67e-05	0	0.000732543	0	0	0	0	0	0	0	0	0	0	0	0	0	0	0	0
ZOTU12435	0	4.18e-05	0	0	0.000255021	5.57e-05	0	0	0	0	0	0	0	0	0	0	0	0	0	0	0	0	0	0	0	0	0	0.0015856	0.000740317	0.00039704	0	3.38e-05	0.000435566	0	0	0	0	0	0	0	0	0	0	0	0	0	0	0	0
ZOTU3577	0	0	0	0	0	0	0	3.45e-05	9.51e-05	0	0	0	0	0	0	0	0	0	0	0	0	0	0	0	0	0	0	0	0	1.8e-05	0	0	0	0	0	0	0	0	0.000253211	4.43e-05	0.000265892	0.000543336	0.000399893	0	0	0	0	0	0
ZOTU11285	0	0	0	0	0	0.000139276	0.000502447	0.000396997	0.000228263	0	0	0	0	0	0	0	0	0	0	0	0	0	0	0	0	0	0	0	1.68e-05	7.22e-05	0.000209962	0.000405118	0	0	0	0.000157944	0.000387597	0.000626439	0.000207173	0.000177313	0	0	0	0	0	0	0	0	0
ZOTU5908	0	0	0	0	0	0	0	0	0	0	0	0	0	0	0	0	0	0	0	0	0	0	0	0	0	0	0	0	0	0	0	0	0	0	0	0	0	0	0	0	0	0	0	0	0	0	0.00186348	0	0
ZOTU2227	0	0	0	0	0	0.000334262	0.000458756	0.000207129	0.000171197	0	0	0	0	0	0	0	0	8.59e-05	8.79e-05	0	0	0	0	0	0	0	0	1.91e-05	5.05e-05	7.22e-05	0.000676543	0.000337598	0	0	8.46e-05	0.000552803	0.000667528	0.000128973	0	0	0	0	0	0	0	0	0	3.67e-05	0
ZOTU3337	0	0	0	0	0	0	0	0	0	0	0	0	0	0	0	0	0	0	0	0	0	0	0	0	0	0	0	0	0	0	0	0	0	0	0	0	0	0	0	0	0	0	0	0	0	0.00302604	0	0	0
ZOTU9466	0	0	0	0	0	4.18e-05	2.18e-05	0.00024165	0.000437504	0	0	0	0	0	0	0	0	0	0	0	0	0	0	0	0	0	0	0	0	0.000144378	9.33e-05	0.000135039	0	0	0	0.000138201	2.15e-05	5.53e-05	0.000621518	0.000797908	0.000511331	0.000149886	0.000133298	0.000226946	1.74e-05	0	0	1.84e-05	9.94e-05
ZOTU10737	0.00010655	0.000104605	0	0	0.000334715	0.000222841	8.74e-05	0.000138086	0	0.000180411	9.78e-05	0	0	0	0	0	0.000152393	0.000343584	0.000131874	0	0	0	0	0	0	0	0	0.000171933	0.000151428	0.000108284	9.33e-05	6.75e-05	9.9e-05	0.000408804	0.000253684	7.9e-05	0	0.000128973	0	4.43e-05	0	0	0	0	0	0	0	0	0
ZOTU3565	0	0	0	0	0	0	0	0	0	0	0	0	0	0	0	0	0	0	0	0	0	0	1.64e-05	0	0	0.00348969	0	0	0	0	0	0	0	0	0	0	0	0	0	0	0	0	0	0	0	0	0	0	0
ZOTU2817	0	0	0	0	1.59e-05	0.000111421	0.000305837	0.000448779	0.000608701	0	0	0	0	0	0	0	0	0.000171792	0	0	0	0	0	0	0	0	0	1.91e-05	3.37e-05	5.41e-05	0.000606555	0.000540157	0	0	6.34e-05	0.000296144	0	0.000515891	0	8.87e-05	0	0	1.9e-05	0	0	0	0	0	0
ZOTU6945	0	0	0	0	0.000159388	0.000208914	0.000742747	0.000189868	1.9e-05	0	0	0	0	0	0	0	3.39e-05	0.000103075	2.2e-05	0	0	0	0	0	0	0	0	7.64e-05	0.000168254	0.000324851	0.000186632	0.000270079	0.000197985	2.15e-05	0.000105702	7.9e-05	0.000538329	5.53e-05	0	0	0	0	0	0	0	0	0	0	0
ZOTU4282	0	0	0	0	0	2.79e-05	0	8.63e-05	0.000190219	0	0	0	0	0	0	0	0	3.44e-05	2.2e-05	0	0	0	0	0	0	0	0	0	1.68e-05	5.41e-05	0	6.75e-05	0	0	0	0	0	0	0.000345288	2.22e-05	0.000143173	0.00013115	5.71e-05	0.00104395	0.000417885	0.000309752	4.9e-05	0.000458783	0.000178902
ZOTU11715	0	0.000104605	0	0	0.000159388	0.000236769	0.000240301	0.000258911	0.000171197	0	0	0	0	0	0	0	0	8.59e-05	0.000109895	0	0	0	0	0	0	0	0	1.91e-05	0.000100952	0.000162426	0.000326607	0.000202559	0	0.000301224	0.000190263	0.000157944	0	7.37e-05	0.000115096	8.87e-05	0.000224986	9.37e-05	5.71e-05	0	0	0	0	1.84e-05	0
ZOTU12940	0	0	0	0	0	0	0	0	0	0	0	0	0	0	0	0	0	0	0	0	0	0	0	0	0	0	0	0	0	0	0	0	0	0	0	0	0	0	2.3e-05	0	0	0	0	1.51e-05	0	0.00193	0.000269714	0	0
ZOTU14715	0	0	0	0	0	4.18e-05	0.000415065	0.000155347	0.000475547	0	0	0	0	0	0	0	0	0	0	0	0	0	0	0	0	0	0	0	0	7.22e-05	0.000303278	0.000405118	0	0	4.23e-05	1.97e-05	0.000215332	0.00110548	0.000138115	4.43e-05	2.05e-05	0	0	0	0	0	0	3.67e-05	0
ZOTU4338	1.33e-05	2.09e-05	0	0	6.38e-05	0.000292479	0.000174764	0.000224389	0.000285328	0	0	0	0	0	0	0	0	0	0	0	0	0	0	0	0	0	0	5.73e-05	0.000201905	9.02e-05	0.000396594	0.000472638	1.98e-05	0	6.34e-05	0.000296144	0.000344531	0.00031322	0	0.000155149	0	0	0	0	0	0	0	0	0
ZOTU12209	1.33e-05	2.09e-05	0	0	0.0018489	0.00097493	0.000371374	1.73e-05	0	0	0	0	0	0	0	0	3.39e-05	6.87e-05	0	0	0	0	0	0	0	0	0	1.91e-05	1.68e-05	1.8e-05	0	0	1.98e-05	0	0	0	0	0	0	0	0	0	1.9e-05	0	0	0	0	3.67e-05	0
ZOTU10335	0	0	0	0	0	0	0	6.9e-05	0.000247285	0	0	0	0	0	0	0	0	0	0	0	0	0	0	0	0	0	0	0	0	0	0	0.000236319	0	0	0	1.97e-05	0	0	0.00027623	0.000155149	0.000634051	0.000412186	0.00140915	1.51e-05	0	0	0	0	0
ZOTU3372	0	0	0.00344837	0	0	1.39e-05	0	0	0	0	0	0	0	0	0	0	0	0	0	0	0	0	0	0	0	0	0	0	0	0	0	0	0	0	0	0	0	0	0	0	0	0	0	0	0	0	0	0	0
ZOTU4772	0	0	0	0	0	2.79e-05	0	0	9.51e-05	0	0	0	0	0	0	0	0	0	0	0	0	0	0	0	0	0	0	0	0	1.8e-05	0	0	0	0	0	7.9e-05	0	0	4.6e-05	0.000598431	0	0.0002623	3.81e-05	1.51e-05	0.000174119	0	4.9e-05	0.000183513	0
ZOTU342	1.33e-05	2.09e-05	0.0230159	0.111711	0	0	0	0	0	0	4.19e-05	0	0	0	0	0	0	0	0	0	0	0	0	0	0	0	0	0	0	0	0	0	0	0	0	0	0	0	0	0	0	0	0	0	0	0	2.45e-05	0	0
ZOTU5056	0	0	0	0	0	2.79e-05	0	0.000120825	3.8e-05	0	0	0	0	0	0	0	0	0	0	0	0	0	0	0	0	0	0	0	0	3.61e-05	0.000116645	6.75e-05	0	0	0	9.87e-05	0	0	0.000115096	6.65e-05	2.05e-05	0	0	6.05e-05	0	0.000119136	0	0.000770755	0
ZOTU7910	0	0	0	0	0	2.79e-05	2.18e-05	0	0	0	0	0	0	0	0	0	1.69e-05	3.44e-05	0	0	0	0	0	0	0	0	0	7.64e-05	0.000117778	0.000180473	2.33e-05	0	3.96e-05	0.000258192	6.34e-05	0	0	0	0	0	0	0	0	0	0	0	0	0	0
ZOTU2885	0	0	0	0	0	0	0	0	0	0	0	0	0	0	0	0	0	0	0	0	0	0	0	0	0	0	0	0	0	0	0	0	0	0	0	0	0	0	0	0	0	0	0	0.00292004	0	0	0	0.000532188	0
ZOTU5098	0	0	0	0	0.000111572	0.000278552	0.0012015	0.00046604	0.000114131	0	0	0	0	0	0	0	0	0	0	0	0	0	0	0	0	0	0	0	3.37e-05	0.000180473	0.000279949	0.000168799	0	0	0	9.87e-05	0.000516796	0	0	0	0	0	0	0	0	0	0	0	0
ZOTU2811	2.66e-05	0	0	0	0.000366592	0.000236769	0.000764593	0.000103564	1.9e-05	0	0	0	0	0	0	0	6.77e-05	0.000171792	0	0	0	0	0	0	0	0	0	0.000305659	0.00021873	0.000288757	0.000139974	3.38e-05	0.000158388	0.000451836	0	1.97e-05	0	0	6.91e-05	0	0	0	0	0	0	0	0	0	0
ZOTU9941	0	0	0	0	0.000605674	1.39e-05	0	0	0	0	0	0	0	0	0	0	0	0	0	0	0	0	0	0	0	0	0	0.000916976	0.000386984	0.000126331	0	0	0.0013067	0	8.46e-05	0	0	0	0	0	0	0	0	0	0	0	0	0	0
ZOTU5714	0	0	0	0	1.59e-05	0.000194986	8.74e-05	0.000103564	0.000114131	0	0	0	0	0	0	0	0	0	0	0	0	0.000101133	0	0	0	0	0	3.82e-05	5.05e-05	5.41e-05	4.67e-05	0.000202559	0	0	0.000147982	1.97e-05	0.00127046	0.000147398	9.21e-05	2.22e-05	0	0.000711957	1.9e-05	0	0	0	0	0	0
ZOTU2837	0	0	0	0	0	9.75e-05	0.000305837	6.9e-05	0.000285328	0	0	0	0	4.28e-05	0	0	0	0	0	0	0	0	0	0	0	0	0	0	0	0.000108284	9.33e-05	0.000135039	0	0	0	3.95e-05	0.00183032	0.00031322	4.6e-05	0	0	0	0	0	0	0	0	0	0
ZOTU11040	0	6.28e-05	0	0	0	1.39e-05	2.18e-05	0.000379736	0.000570657	0	0	0	0	0	0	0	0	0	0	0	0	0	0	0	0	0	0	0	0	0	0.000139974	0.000337598	0	0	4.23e-05	0.000197429	0.000645995	0.000221096	2.3e-05	0.000155149	0	0	1.9e-05	0.000181557	1.74e-05	0	0	0.000201864	0.000198779
ZOTU13322	0.000186463	8.37e-05	0	0	0.000733185	0.000125348	0	0	0	6.56e-05	4.19e-05	3.17e-05	0	0	0	0	0.000423313	6.87e-05	0	0	0	8.43e-05	0	0	0	0	0	0.00021014	8.41e-05	0.000162426	0	3.38e-05	0.00102952	0	4.23e-05	0	2.15e-05	0	0	0	0	0	0	0	0	0	0	0	0
ZOTU7573	0	2.09e-05	0	0	0.000159388	0.000724234	0.000524292	0.000172607	0	0	0	0	0	0	0	0	0	6.87e-05	0.000197811	0	0	0	0	0	0	0	0	1.91e-05	0.000168254	9.02e-05	0.00097982	6.75e-05	0	0	0.000211403	1.97e-05	0	0	0	0	0	0	0	0	0	0	0	0	0
ZOTU3050	1.33e-05	0	0	0	4.78e-05	6.96e-05	4.37e-05	0.000155347	7.61e-05	1.64e-05	0	0	0	0	0	0	0	3.44e-05	0	0	0	0	0	0	0	0	0	1.91e-05	0.000100952	9.02e-05	0.000186632	0.000236319	5.94e-05	0	0.000232543	0.00163867	0	0.000331644	6.91e-05	0	0	0	0	0	0	0	0	0	0
ZOTU2771	0	0	0	0	0.000749123	8.36e-05	0	0	0	0	0	0	0	0	0	0	0	0	0	0	0	1.69e-05	0	0	0	0	0	0.00173843	0.000117778	0.000180473	0	0	0.000534558	0	0	0	0	0	0	0	0	0	0	0	0	0	0	0	0
ZOTU2593	0.000692576	0.000125526	0	0	0.000223143	0.000571031	0	3.45e-05	0	0.000131208	6.99e-05	0	0	0	0	0	0.00033865	0.000446659	4.4e-05	0	0	0.000168554	3.27e-05	0	0	0	0	3.82e-05	0.000185079	9.02e-05	2.33e-05	0	0	0	0.000105702	9.87e-05	0	0	0	0	0	0	0	0	0	0	0	0	0
ZOTU11584	1.33e-05	0	0	0	0	5.57e-05	0	0.000207129	0.000152175	0	0	0	0	0	0	0	0	1.72e-05	0	0	0	0	0	0	0	0	0	0.000133726	0	0.000162426	0.000326607	0.000371358	3.96e-05	0	0.000317105	0.000691003	0	0.000221096	0.000437365	0.000132985	0.000102266	0	3.81e-05	0	0	0	0	0	0
ZOTU11594	0	0	0	0	0	0	0	0	0	0	0	0	0	0	0	0	0	0	0	0	0	0	0	0	0	0	0	0	0	0	0	0	0	0	0	0	0	0	0.000483403	4.43e-05	0.000531784	0.000974257	0.000476064	0.000272335	0.000104471	0	0	0.000201864	0
ZOTU2574	0	0	0	0	0	0	0	0	0	0	0	0	0	0	0	0	0	0	0	0	0	0	0	0	0	0	0	0	0	0	0	0	0	0	0	0	0	0	0	0	0	0	0	0	0	0	0	1.84e-05	0.00339913
ZOTU2735	0	0.00175736	0.000160389	0	0	0	0	0	0	0.00083645	0.000475239	0	0	0	0	0	0	0	0	0	0	0.00018541	0	0	0	0	0	0	0	0	0	0	0	0	0	0	0	0	0	0	0	0	0	0	0	0	0	0	0
ZOTU11027	0	0	0	0	0	0	0	0	0	0.000393623	0.00301916	0	0	0	0	0	0	0	0	0	0	0	0	0	0	0	0	0	0	0	0	0	0	0	0	0	0	0	0	0	0	0	0	0	0	0	0	0	0
ZOTU8907	0	8.37e-05	0	0	0.000159388	0.000181058	0.000305837	0.000172607	0.000114131	0	0	0	0	0	0	0	1.69e-05	0	0.000395622	0.000269867	0	0	3.27e-05	0	0	0	0	1.91e-05	5.05e-05	9.02e-05	0.000396594	0.000270079	0	0	6.34e-05	3.95e-05	8.61e-05	0.000331644	9.21e-05	0.000132985	0	0	0	0	3.48e-05	0	0	7.34e-05	0
ZOTU3291	0.000439519	0.00023013	0	0	0	0	0	0	0	0.000295217	0.000153754	0	0	0	0	0	0.00172712	0.000532555	0	0	0	1.69e-05	1.64e-05	0	0	0	0	0	0	0	0	0	0	0	0	0	0	0	0	0	0	0	0	0	0	0	0	0	0
ZOTU4057	0	0.00023013	0	0	0.00012751	0.0004039	0.000480601	0.000500561	3.8e-05	0	0	0	0	0	0	0	0	0.000154613	2.2e-05	0	0	0	0	0	0	0	0	0	0.000134603	0.000126331	0.000396594	0.000303838	0	0	2.11e-05	0.000434345	0	3.68e-05	0	0	0	0	0	0	0	0	0	0	0
ZOTU14273	0	0	0	0	0	5.57e-05	0.000589829	0.000327954	0.000361416	0	0	0	0	0	0	0	0	0	0	0	0	0	0	0	0	0	0	1.91e-05	0	3.61e-05	0.000396594	0.000270079	0	0.000150612	0	7.9e-05	0.000236865	0.00027637	6.91e-05	0.000199477	0.000122719	3.75e-05	7.62e-05	0.000105908	0	0	0	0	0
ZOTU2888	0	0	0	0	0	0	0	0	0	0	0	0	0	0	0	0	0	0	0	0	0	0	0	0	0	0	0	0	0	0	0	0	0	0	0	0	0	0	0	0	0	1.87e-05	0	0	0	0.000381234	0	0	0
ZOTU3252	0	0	0	0	0	1.39e-05	0	0	1.9e-05	0	0	0	0	0	0	0	0	0	0	0	0	0	0	0	0	0	0	0	0	0	0	0	0	0	0	3.95e-05	0	0	0.000414346	2.22e-05	8.18e-05	0.000243564	0.00161862	0.000226946	0	0	0	0.00027527	0.000735484
ZOTU10460	0	2.09e-05	0	0	0.000191266	0.000389972	0.000458756	5.18e-05	0.000209241	0	0	0	0	0	0	0	0	5.15e-05	0.000131874	0	0	0	0	0	0	0	0	0.000114622	0.000252381	0.000288757	0.000653214	0.000135039	3.96e-05	0	4.23e-05	0.000315887	0.000322997	9.21e-05	0	0	0	0	0	0	0	0	0	0	0
ZOTU11100	0	4.18e-05	0	0	0.00027096	0.000348189	8.74e-05	0.000258911	0.000133153	0	0	0	0	0	0	0	0	1.72e-05	0	0	0	0	0	0	0	0	0	5.73e-05	0.000168254	0.000234615	0.000349936	0.000135039	3.96e-05	0.00010758	0.000211403	0.000118458	0.000538329	7.37e-05	0	4.43e-05	0	0	0	1.51e-05	0.000139295	0	0	0	0
ZOTU6107	0	0	0	0	0	0	0	0.000293432	0.00112229	0	0	0	0	0	0	0	0	0	0	0	0	0	0	0	0	0	0	0	0	0	2.33e-05	0.000472638	0	0	0	3.95e-05	0	0	0.000253211	0.000421118	0.000613597	1.87e-05	3.81e-05	1.51e-05	0	0	0	7.34e-05	0
ZOTU4887	0.000186463	2.09e-05	0	0	0.000286898	6.96e-05	8.74e-05	0.000138086	0	0	0	0	0	0	0	0	6.77e-05	0.00146023	0	0	0	0	1.64e-05	0	0	0	0	0.000133726	1.68e-05	0.000126331	7e-05	3.38e-05	9.9e-05	0	0	0.000118458	0.000452196	0	0	0	0	0	0	0	0	0	0	0	0
ZOTU6321	2.66e-05	0	0	0	0.000143449	0.000125348	0	0	1.9e-05	1.64e-05	0	0	0	0	0	0	1.69e-05	1.72e-05	0	0	0	0	0	0	0	0	0	0.00078325	0.000824444	0.000812128	0	0	0.000554357	0	0	1.97e-05	0	0	2.3e-05	0	0	0	0	0	0	0	0	0	0
ZOTU3678	0	0.000209209	0	0	0	0	0	0	0	0	0	0	0	0	0	0	0	0	0	0	0	0.000758495	0.00022908	0.000731475	0.00104111	0.000410551	0	0	0	0	0	0	0	0	0	0	0	0	0	0	0	0	0	0	0	0	0	0	0
ZOTU7717	0	0.000753154	0	0	0	0	0	0	0	0	0	0	0	0	0	0	0	0	0	0	0	0	0	0	0	0	0	0	0	1.8e-05	0	0	0	0	0	1.97e-05	0	1.84e-05	0	0	0	0	0	3.03e-05	1.74e-05	0.000142963	0	1.84e-05	0.00272328
ZOTU10979	0.000146506	8.37e-05	0	0	0	4.18e-05	0	0	0	0.000574034	9.78e-05	0	0	0	0	0	1.69e-05	0.000429479	0.00160447	0	0	0	0	0	0	0	0	0	0	7.22e-05	9.33e-05	0	0	0.000150612	4.23e-05	1.97e-05	0	0	0	0	0	0	0	0	0	0	0	0	0
ZOTU9616	5.33e-05	0.000146447	0	0	9.56e-05	0.000208914	0.000262146	0.00024165	0.000228263	4.92e-05	0	0	0	0	0	0	1.69e-05	0.000274867	6.59e-05	0	0	0	0	0	0	0	0	0.000286555	8.41e-05	7.22e-05	4.67e-05	0.000202559	3.96e-05	4.3e-05	0.000105702	0.000157944	0	1.84e-05	0.000161134	0.000155149	2.05e-05	0	0.000171383	9.08e-05	0	0	0	7.34e-05	0
ZOTU7578	6.66e-05	0	0	0	0.000302837	0.000111421	0	0	1.9e-05	6.56e-05	2.8e-05	0	0	0	0	0	0.000101595	5.15e-05	0	0	0	0	0	0	0	0	0	0.000439384	0.00065619	0.000505324	0	0.000101279	0.000732543	0	0.000190263	0	0	0	0	0	0	0	0	0	0	0	0	0	0
ZOTU8569	0	0	0	0	0.000159388	0.000181058	0.000152919	8.63e-05	1.9e-05	0	0	0	0	0	0	0	1.69e-05	0	0	0	0	0	0	0	0	0	0	0.000267451	0.000487936	0.000360946	0.000209962	0.000202559	0.000356372	8.61e-05	0.000507367	0.000276401	0	0	0	0	0	0	0	0	0	0	0	0	0
ZOTU5899	2.66e-05	6.28e-05	0	0	1.59e-05	1.39e-05	2.18e-05	8.63e-05	0.000114131	0	0	0	0	0	0	0	0	0	0	0	0	0	0	0	0	0	0	1.91e-05	5.05e-05	0.000162426	0.000209962	0	0	0	0	9.87e-05	0.000301464	0	0.000460384	0.00048761	0.000204532	0	0	0	0	0	0	0	0.00103365
ZOTU14447	4e-05	0	0	0	0.000207204	6.96e-05	0	0	0	0	0	0	0	0	0	0	0.000186258	6.87e-05	0	0	0	0	0	0	0	0	0	0.000802354	0.000538412	0.000487277	0	0	0.000752341	0.00010758	0.000105702	0	0	0	0	0	0	0	0	0	0	0	0	0	0
ZOTU11311	0	2.09e-05	0	0	0	0	0	0.000172607	0.000665766	0	0	0	0	0	0	0	0	0	0	0	0	0	0	0	0	0	0	0	0	0.00019852	7e-05	0.000101279	0	0	0	0.000157944	0	0	0.0010819	0.000620595	0.000306799	9.37e-05	0	0.000136168	0	0	0	0.000110108	0
ZOTU6232	0	0	0	0	1.59e-05	2.79e-05	0.000131073	0.000103564	0	0	0	0	0	0	0	0	0	0	2.2e-05	0	0	0	0	0	0	0	0	9.55e-05	3.37e-05	3.61e-05	2.33e-05	0	5.94e-05	0.00129096	0.000866753	0.000394859	0	0.000239521	0	0	0	0	0	0	0	0	0	0	0
ZOTU4727	0	0	0	0	3.19e-05	0.000139276	0.00019661	0.000258911	0.000152175	0	0	0	0	0	0	0	0	0	0	0	0	1.69e-05	0	0	0	0	0	0	3.37e-05	0	0.000209962	0.000371358	0	0	2.11e-05	0.000138201	0.000516796	0.00121603	0	2.22e-05	0	0	0	1.51e-05	0	0	0	0	0
ZOTU5240	2.66e-05	0	0	0	0.000382531	0.000278552	2.18e-05	1.73e-05	5.71e-05	0	0	0	0	0	0	0	0	1.72e-05	0	0	0	0	0	0	0	0	0	0.000305659	5.05e-05	3.61e-05	0.00025662	0	0.00025738	0.00114035	0.000422806	0	0	0	6.91e-05	0	0	0	0	0	0	0	0	0	0
ZOTU3824	0	2.09e-05	0	0	0.00100414	0.000334262	0	1.73e-05	0	0	0	0	0	0	0	0	0	5.15e-05	0	0	0	0	0	0	0	0	0	0.000515799	0.000353333	0.00019852	0	0	0.000653349	0	0.000190263	0	0	0	0	0	0	0	0	0	0	0	0	0	0
ZOTU13530	0	0	0	0	0.000717246	0.000111421	4.37e-05	1.73e-05	0	0	0	0	0	0	0	0	1.69e-05	0.000309225	6.59e-05	0	0	0	0	0	0	0	0	0.00114622	0.000201905	0.000234615	0	0	0.000395969	0	0	5.92e-05	0	0	0	0	0	0	1.9e-05	0	0	0	0	0	0
ZOTU2229	0	0	0	0	0	0	0	0	0	0	0	0.00245381	0	0	0	0	0	0	0	0	0	0	0	1.83e-05	0	0	0	0.000229244	0	1.8e-05	0	0	0.000336574	0	0	0	0.000279931	0	0	0	0	0	0	0	0	0	0	0	0
ZOTU4667	0	0	0	0	0	0	0	0.000207129	0.00150273	0	0	0	0	0	0	0	0	0	0	9.94e-05	0	0	0	0	0	0	0	0	0	0	0	0.000101279	0	0	0	0	0	0	0.00027623	6.65e-05	0.000429518	1.87e-05	7.62e-05	0	0.000539769	0	0	1.84e-05	0
ZOTU4927	0	4.18e-05	0	0	0.000159388	0.000181058	0.000131073	1.73e-05	0	0	0	0	0	0	0	0	1.69e-05	3.44e-05	0	0	0	0	0	0	0	0	0	0.000248348	0.00043746	0.000216567	0.000163303	0.000202559	0.000336574	0.000580933	0.000528508	3.95e-05	0	0	0	0	0	0	0	0	0	0	0	0	0
ZOTU7652	2.66e-05	4.18e-05	0	0	0.000414409	0.000153203	0	0	0	9.84e-05	0.000279552	0	0	0	0	0	1.69e-05	0.000120254	0	0	0	0	0	0	0	0	0	0.000534902	3.37e-05	7.22e-05	0	0	0.00152448	0	0	0	0	0	0	0	0	1.87e-05	0	0	0	0	0	0	0
ZOTU12688	0	0	0	0	0	0.000181058	0.000174764	0.000207129	5.71e-05	0	0	0	0	0	0	0	0	6.87e-05	2.2e-05	0	0	0	0	0	0	0	0	1.91e-05	8.41e-05	1.8e-05	0.00025662	0.000236319	1.98e-05	0.000236676	0.000486227	0.000454088	4.31e-05	0.000386918	4.6e-05	0.000265969	0	5.62e-05	0	1.51e-05	0	0	0	0	0
ZOTU2868	0	0	0	0	0	0	0	0	0	0	0	0	0	0	0	0	0	0	0	0	0	0.000404531	0.00160356	0.00058518	0.00073885	0	0	0	0	0	0	0	0	0	0	0	0	0	0	0	0	0	0	0	0	0	0	0	0
ZOTU3102	0	0	0	0	7.97e-05	0.000181058	0.000851975	0.000345214	0	0	0	0	0	0	0	0	0	0	0	0	0	0	0	0	0	0	0	7.64e-05	0.000117778	0.000162426	0.000279949	0.000337598	5.94e-05	0.000494868	0.000147982	0.000197429	0	0	0	0	0	0	0	0	0	0	0	0	0
ZOTU4585	0.000279694	4.18e-05	0	0	0	0	0	0	0	0	0	0	0	0	0	0	1.69e-05	0.00146023	0.000835202	0.000695973	0	0	0	0	0	0	0	0	0	0	0	0	0	0	0	0	0	0	0	0	0	0	0	0	0	0	0	0	0
ZOTU11475	0	8.37e-05	0	0	0	0.000181058	0.000109228	0.000379736	0.000285328	0	0	0	0	0	0	0	0	1.72e-05	4.4e-05	0	0	0	0	0	0	0	0	0	0	0.000162426	0.000139974	0.000135039	0	0	6.34e-05	0.000315887	0.000581395	0.000644864	9.21e-05	0.000310297	4.09e-05	9.37e-05	3.81e-05	0	1.74e-05	0	0	0	0
ZOTU3379	2.66e-05	8.37e-05	0	0	0.00012751	0.000139276	0.00019661	5.18e-05	0.000152175	4.92e-05	0	0	0	0	0	0	1.69e-05	0.000154613	2.2e-05	0	0	0	0	0	0	0	0	0.000458488	0.000134603	0.000144378	0.000116645	0.000202559	0.000138589	0.00021516	0.000528508	0.000157944	8.61e-05	5.53e-05	6.91e-05	0	0	0	0	0	0	0	0	0	0
ZOTU9253	0	0	0	0	6.38e-05	0	0	0	0	0	0	0	0	0	0	0	0	0	0	0	0	0	0	0	0	0	0	0.00147098	0.000100952	0.000126331	0	0	0.00156408	0	0	0	0	0	0	0	0	0	0	0	0	0	0	0	0
ZOTU3349	0	2.09e-05	0.000374241	0.00265706	0	0	0	0	0	0	0	0	0	0	0	0	0	0	0	0	0	0	6.55e-05	3.66e-05	0.00016792	0	0	0	0	0	0	0	0	0	0	0	0	0	0	0	0	0	0	0	0	0	0	0	0
ZOTU9550	0	0	0	0	1.59e-05	0	0	0	0.000285328	0	0	0	0	0	0	0	0	0	0	0	0	0	0	0	0	0	0	0	0	7.22e-05	0.000186632	0.000101279	0	0	0	0.000118458	0	0	0.000414346	0.000177313	0.000224986	5.62e-05	0.000894999	3.03e-05	6.96e-05	0.000500369	4.9e-05	0.000495486	1.99e-05
ZOTU5700	0	0	0	0	1.59e-05	0.000208914	2.18e-05	0.000224389	0.000361416	0	0	0	0	0	0	0	0	0	0	0	0	0	0	0	0	0	0	0	1.68e-05	0.000162426	0.000349936	0.000371358	0	0	0	0.000177687	0	0.00027637	0.000138115	0.000132985	8.18e-05	1.87e-05	7.62e-05	0.000151297	0	0	0	0.000128459	9.94e-05
ZOTU13356	6.66e-05	0	0	0	0.00012751	2.79e-05	0	0	0	0.00016401	0.000321485	0	0	0	0	0	0.000575705	8.59e-05	2.2e-05	0	0	0.000404531	0.000310894	0	0	0	0	1.91e-05	0.000151428	3.61e-05	2.33e-05	0	0.000277178	0.000301224	0.000401666	0	0	0	0	0	0	0	0	0	0	0	0	0	0
ZOTU7676	7.99e-05	0	0	0	0.000191266	0.0004039	0.000349528	0.0004833	5.71e-05	0	0	0	0	0	0	0	5.08e-05	0.000103075	0	0	0	0	0	0	0	0	0	3.82e-05	0.000319682	0.000144378	0.000209962	0.000135039	7.92e-05	0.000258192	6.34e-05	7.9e-05	0	0	2.3e-05	0.000110821	0	1.87e-05	0.000114255	0	0	0	0	0	0
ZOTU2911	0.000146506	0.000543944	0	0	0	0	0	0	0	0	0	0	0	0	0	0	0	0.000377942	0.00213196	7.1e-05	0	0	0	0	0	0	0	0	0	1.8e-05	0	0	0	0	0	0	0	0	0	0	0	0	1.9e-05	0	0	0	0	0	0
ZOTU5319	6.66e-05	0	0	0	0	0	0	0	0	0.000295217	0.000237619	0.00270711	0	0	0	0	0	0	0	0	0	0	0	0	0	0	0	0	0	0	0	0	0	0	0	0	0	0	0	0	0	0	0	0	0	0	0	0	0
ZOTU11617	0	0	0	0	0	2.79e-05	0.000109228	0.000258911	0.000722832	0	0	0	0	0	0	0	0	0	0	0	0	0	0	0	0	0	0	0	0	7.22e-05	4.67e-05	0.000270079	0	0	0	0.000256658	0	1.84e-05	0.000345288	0.000465446	0.000245439	1.87e-05	1.9e-05	0.000544671	1.74e-05	0.000190617	2.45e-05	7.34e-05	0
ZOTU5512	0	0	0	0	0	2.79e-05	4.37e-05	0	0	0	0	0	0	0	0	0	0	0	0	0	0	0	0	0	0	0	0	3.82e-05	6.73e-05	3.61e-05	4.67e-05	3.38e-05	0.000118791	0.00146309	0.00112044	1.97e-05	0.000215332	7.37e-05	0	0	0	0	0	0	0	0	0	0	0
ZOTU11545	0	0.000104605	0	0	9.56e-05	0.000320334	0	0	0	1.64e-05	0	0	0	0	0	0	6.77e-05	0.000154613	2.2e-05	0	0	0	0	0	0	0	0	3.82e-05	6.73e-05	0.000613608	0.000629885	0	3.96e-05	0.000408804	0.000613069	0	0	0.000110548	0	0	0	0	0	0	0	0	0	0	0
ZOTU2278	0.00246397	0.000271972	0	0	0	1.39e-05	0	0	0	0.000278817	0	0	0	0	0	0	0.00013546	1.72e-05	0	0	0	6.74e-05	4.91e-05	0	0	0	0	0	0	0	0	0	0	0	0	0	0	0	0	0	0	0	0	0	0	0	0	0	0
ZOTU3072	0	0	0	0	0	1.39e-05	0.000152919	0.000379736	0.000152175	0	0	0	0	0	0	0	0	0	0	0	0	0	0	0	0	0	0	0	3.37e-05	5.41e-05	0.000396594	0	0	0	8.46e-05	0.000197429	0.000947459	0.000884385	0	0	0	0	0	0	0	0	0	0	0
ZOTU2762	0	0	0	0	0	0	0	0	0	0	0	0	0	0	0	0	0	0	0	0	0	0.00284857	0.000441797	0	0	0	0	0	0	0	0	0	0	0	0	0	0	0	0	0	0	0	0	0	0	0	0	0	0
ZOTU8253	0	0	0	0	0	0	0	0.000189868	0.000342394	0	0	0	0	0	0	0	0	0	0	0	0	0	0	0	0	0	0	0	0	9.02e-05	2.33e-05	3.38e-05	0	0	0	1.97e-05	0	0	0.000437365	0.000199477	0.000920396	0.000805636	3.81e-05	0.000332854	0	2.38e-05	0	0.000165162	3.98e-05
ZOTU8218	0	0	0	0	0	4.18e-05	0.000393219	0.000120825	0.000513591	0	0	0	0	0	0	0	0	1.72e-05	0	0	0	0	0	0	0	0	0	0	1.68e-05	0.000216567	0.000186632	0.000371358	0	0	0	9.87e-05	0	0.000110548	0.000345288	0.000332462	0.000163626	0.000281036	0	1.51e-05	0	0	0	5.51e-05	0
ZOTU10643	0.000199782	0.000104605	0	0	0.000111572	9.75e-05	0.000152919	5.18e-05	0	0	0.000139776	0	0	0	0	0	5.08e-05	5.15e-05	0	0	0	6.74e-05	0	0	0	0	0	9.55e-05	0.000252381	0.000144378	0.000209962	0	0.000138589	0.000516384	0.000317105	3.95e-05	0.000279931	0.000257946	0	0	0	0	0	0	0	0	0	0	0
ZOTU11444	0	0	0	0	0	0	0	0.000120825	0.000247285	0	0	0	0	0	0	0	0	0	0	0	0	0	0	0	0	0	0	0	0	7.22e-05	0.000139974	0.000135039	0	0	0	1.97e-05	0	0	0.000115096	0.000620595	0.000306799	0.000580807	0.000495106	0.000166427	0	4.77e-05	0	0.00027527	0.000238535
ZOTU5719	5.33e-05	6.28e-05	0	0	7.97e-05	8.36e-05	0.000174764	0.000224389	0.000285328	1.64e-05	0	0	0	0	0	0	8.47e-05	0.000137433	8.79e-05	0	0	0	0	0	0	0	0	7.64e-05	8.41e-05	5.41e-05	4.67e-05	0.000135039	0.000296977	0	0	0.000414602	0.000452196	3.68e-05	0.000161134	4.43e-05	4.09e-05	7.49e-05	5.71e-05	0	0	0	0	0	0
ZOTU3966	0	0	0	0	0	0	0	0	0	0	0	0	0	0	0	0	0	0	0	0	0	0	0	0	0	0	0	0	0	0	0	0	0	0	0	0	0	0	0	0	0	0	0	0	0	0.00212061	0	0	0
ZOTU14309	0	0	0	0	0	0	0	1.73e-05	1.9e-05	0	0	0	0	0	0	0	0	0	0	0	0	0	0	0	0	0	0	0	0	0	0	0	0	0	0	5.92e-05	0	0	0.000115096	0.000132985	0.000470425	0.00039345	0.000856914	0.000469022	0.000174119	0	0	0.00055054	0
ZOTU3551	0	0	0	0	0	0	0	0	0	0	0	0	0	0	0	0	0	0	0	0	0	0	0	0	0	0	0	0.000229244	1.68e-05	5.41e-05	0	0	0.00289057	0	6.34e-05	0	0	0	0	0	0	0	0	0	0	0	0	0	0
ZOTU13778	0	0	0	0	0	0	2.18e-05	5.18e-05	0.000190219	0	0	0	0	0	0	0	0	0	0	0	0	0	0	0	0	0	0	0	0	0	4.67e-05	0.000101279	0	0	0	0	0	0	6.91e-05	6.65e-05	4.09e-05	0.000149886	0.000133298	4.54e-05	0	0.000381234	0.00201059	0	0.000298169
ZOTU4245	0	0	0	0	0	0	0	0	0	0	0	0	0	0	0	0	0	0	0	0	0	0	0	0	0	0	0	0	0	0	0	0	0	0	0	0	0	0	0	0	4.09e-05	0	1.9e-05	1.51e-05	3.48e-05	0.000619505	0	0.000367026	0.000457193
ZOTU5458	0	0	0	0	0.000111572	6.96e-05	0	0.000103564	0	0	0	0	0	0	0	0	0	0	0	0	0	0	0	0	0	0	0	9.55e-05	0.000555238	0.000342898	9.33e-05	0	0.000158388	0.00010758	6.34e-05	0	0.00139966	0	2.3e-05	0	0.000122719	0	0	0	0	0	0	0	0
ZOTU12392	0	0	0	0	0	4.18e-05	0	0.000120825	0.000342394	0	0	0	0	0	0	0	0	0	0	0	0	0	0	0	0	0	0	0	0	3.61e-05	0	0.000101279	0	0	0	3.95e-05	0	9.21e-05	0	0.000465446	0.000409065	0.000768164	0.000476064	0.000196687	5.22e-05	0	0	0.000238567	0
ZOTU3843	0	0	0	0	0	0	0	0	0.000114131	0	0	0	0	0	0	0	0	0	0	0	0	0	0	0	0	0	0	0	0	5.41e-05	0	6.75e-05	0	0	0	1.97e-05	0	0	0.000391326	2.22e-05	0.000224986	3.75e-05	1.9e-05	0.000453892	0.0014626	0	0	0.000605593	9.94e-05
ZOTU11374	0	0	0	0	0	0	0	0	0	0	0	0	0	0	0	0	0	0	0	0	0	0	0	0	0	0	0	0	0	0	0	0	0	0	0	0	0	0	0	0	0	0	0	9.08e-05	0.000313414	0.000500369	0	0.000403729	0.00145109
ZOTU3221	0	0	0	0	0	5.57e-05	2.18e-05	0.000414257	0.000741854	0	0	0	0	0	0	0	0	0	0	0	0	0	0	0	0	0	0	0	0	3.61e-05	0.000373265	0.000472638	0	0	6.34e-05	0.000967404	0	0.000368494	0	2.22e-05	0	0	0	3.03e-05	0	0	0	0	0
ZOTU5105	0.00107882	0.000125526	0	0	0	0	0	0	0	0.000820049	0.000782746	0	0	0	0	0	0.000372515	3.44e-05	0	0	0	1.69e-05	0	0	0	0	0	0	0	0	0	0	0	0	0	0	0	0	0	0	0	0	0	0	0	0	0	0	0
ZOTU14089	0	0	0	0	1.59e-05	5.57e-05	0	0.000258911	0.000323372	0	0	0	0	0	0	0	0	0	0	0	0	0	0	0	0	0	0	0	0	7.22e-05	0.000186632	0	0	0	0	0.000157944	0.000236865	0	0.000437365	0.000443282	0.000122719	0.000318507	0.000361808	0.000287465	0.000191531	0	0	7.34e-05	0
ZOTU7009	0	6.28e-05	0	0	0.000207204	0.000264624	0.000131073	3.45e-05	5.71e-05	1.64e-05	0	0	0	0	0	0	1.69e-05	3.44e-05	0	0	0	0	0	0	0	0	0	7.64e-05	0.000100952	0.000162426	0.000186632	0.000168799	3.96e-05	0.000882157	0.000507367	0.000177687	0	3.68e-05	2.3e-05	2.22e-05	0	0	0	0	0	0	0	1.84e-05	0
ZOTU3071	0	0	0	0	0	0.000236769	0.000240301	0.000155347	7.61e-05	0	0	0	0	0	0	0	0	5.15e-05	0.000307706	0	0	0	0	0	0	0	0	0	1.68e-05	0.00019852	0.000349936	6.75e-05	0	0	2.11e-05	0.000315887	0.000925926	0.000239521	0	0.000243805	0	0	0	4.54e-05	1.74e-05	0	0	0	0
ZOTU4407	0	0	0	0	0.000207204	0.000111421	0	1.73e-05	0	0	0	0	0	0	0	0	1.69e-05	0	0	0	0	0	0	0	0	0	0	0.00170023	0.000336508	0.000306804	0	3.38e-05	0.000435566	0	0	5.92e-05	0	0	0	0	0	0	0	0	0	0	0	0	0
ZOTU6230	5.33e-05	2.09e-05	0	0	6.38e-05	0.000153203	6.55e-05	0.000103564	7.61e-05	0	0	0	0	0	0	0	3.39e-05	0.000343584	0.000131874	0	0	0	0	0	0	0	0	1.91e-05	5.05e-05	3.61e-05	0.000396594	0.000168799	0	0.000688513	0.000359385	0.000414602	0	3.68e-05	0	0	0	0	0	0	0	0	0	0	0
ZOTU9644	2.66e-05	4.18e-05	0	0	0.000175327	9.75e-05	0	0	0	0	0	0	0	0	0	0	1.69e-05	5.15e-05	0	0	0	0	1.64e-05	0	0	0	0	0.0010507	0.00043746	0.000487277	0	0	0.000791938	0	2.11e-05	0	0	0	0	0	0	0	0	0	0	0	0	0	0
ZOTU11965	2.66e-05	0	0	0	0	0.000194986	0.000152919	0.000138086	0	0	0	0	0	0	0	0	0	0.000137433	2.2e-05	0	0	0	0	0	0	0	0	1.91e-05	0.000100952	0.000288757	0.000209962	0.000303838	0	0.000172128	8.46e-05	9.87e-05	0.00081826	0.000442193	0	0	0	0	0	0	0	0	0	0	0
ZOTU12137	0	0	0	0	0	0	0	0	9.51e-05	0	0	0	0	0	0	0	0	0	0	0	0	0	0	0	0	0	0	0	0	0	0	0	0	0	0	0	0	0	2.3e-05	0	0	0.000599543	0.000133298	6.05e-05	0	0.000762468	0.000514908	0.000348675	0
ZOTU12166	0	0	0	0	0	0.000111421	0.000152919	0.000500561	0.000646744	0	0	0	0	0	0	0	0	0	0	0	0	0	0	0	0	0	0	0	0	0.000108284	0.00048991	0.000337598	0	0	4.23e-05	0.000473831	0	0.000165822	0.000138115	0.000310297	0	0	0	1.51e-05	0	0	0	0	0
ZOTU9826	5.33e-05	6.28e-05	0	0	7.97e-05	0.000167131	0.000240301	0.000120825	9.51e-05	0	0	0	0	0	0	0	1.69e-05	0.000103075	0.000153853	0	0	0.000151699	4.91e-05	0	0	0	4.03e-05	1.91e-05	0.000100952	9.02e-05	0.000303278	0.000270079	9.9e-05	0.000150612	0.000169122	0.000157944	8.61e-05	0.000405343	0	0	2.05e-05	0	0	0	0	0	0	0	0
ZOTU10716	9.32e-05	6.28e-05	0	0	0.000366592	0.000167131	6.55e-05	1.73e-05	0.000152175	0	0	0	0	0	0	0	5.08e-05	0.000137433	2.2e-05	0	0	1.69e-05	0	0	0	0	0	0.000668628	0.000420635	0.000234615	0	6.75e-05	0.000455364	0	0.000147982	5.92e-05	0	0	0	0	0	0	0	0	0	0	0	0	0
ZOTU3650	0	0	0	0	0	0.000181058	2.18e-05	0.000327954	0.000418482	0	0	0	0	0	0	0	0	0	0	0	0	0	0	0	0	0	0	0	0	0.000108284	0.000349936	0.000270079	0	0	2.11e-05	0.000217172	0	0.00031322	0.000161134	0.000265969	0.000327252	0	9.52e-05	0.000363114	0	0	0	1.84e-05	0
ZOTU3717	0	0	0	0	0	0	0	0	0	0	0	0	0	0	0	0	0	0	0	0	0	0	0	0	0	0	0	0	0	0	0	0	0.000554357	0	0.00264254	0	0	0	0	0	0	0	0	0	0	0	0	0	0
ZOTU11700	1.33e-05	2.09e-05	0	0	0.000876634	0.000125348	0	0	0	0	0	0	0	0	0	0	1.69e-05	0	0	0	0	0	0	0	0	0	0	0.000534902	0.000386984	0.000451182	0	3.38e-05	0.000732543	0	0	0	0	0	0	0	0	0	0	0	0	0	0	0	0
ZOTU4221	0	0	0	0	0.000175327	9.75e-05	2.18e-05	0	0	0	0	0	0	0	0	0	1.69e-05	1.72e-05	0	0	0	0	0	0	0	0	0	0.000974286	0.000117778	0.000144378	0	0	0.00158388	0	4.23e-05	0	0	0	0	0	0	0	0	0	0	0	0	0	0
ZOTU6827	0	0	0	0	0	0	2.18e-05	3.45e-05	9.51e-05	0	0	0	0	0	0	0	0	0	0	0	0	0	0	0	0	0	0	0	0	0	2.33e-05	0	0	0	0	0	0	0	9.21e-05	4.43e-05	8.18e-05	0	0	0.000347984	0.000592004	0	0	0.0013213	0.000516827
ZOTU13255	0	0.000418419	0	0	0	5.57e-05	4.37e-05	6.9e-05	0.000133153	0	1.4e-05	0	0	0	0	0	0	0	0	0	0	0	0	0	0	0	0	0	0	5.41e-05	2.33e-05	6.75e-05	0	0	0	3.95e-05	0.000129199	0	6.91e-05	6.65e-05	0.000224986	0.000206093	0.000209468	0.000393373	0	0.000667159	0	0.000568891	0
ZOTU10298	0	0	0	0	3.19e-05	0	0	0	0	0	0	0	0	0	0	0	0	0	0	0	0	0	0	0	0	0	0	9.55e-05	1.68e-05	3.61e-05	0	0	0.00291037	0	6.34e-05	0	0	0	0	0	0	0	0	0	0	0	0	0	0
ZOTU3318	0	0	0	0	0.000207204	0	0	0	0	0	0	0	0	0	0	0	0	0	0	0	0	0	3.27e-05	0	0	0	0	0.00149008	0.000168254	0.000144378	0	0	0.00110871	0	0	0	0	0	0	0	0	0	0	0	0	0	0	0	0
ZOTU2677	1.33e-05	0	0	0	0.000350653	0.000111421	0	0	0	0	0	0	0	0	0	0	5.08e-05	5.15e-05	0	0	0	0	3.27e-05	0	0	0	0	0.000840561	0.000622539	0.000360946	0	0	0.000653349	0	6.34e-05	0	0	0	0	0	0	0	0	0	0	0	0	0	0
ZOTU8842	0.000119869	0	0	0	0	0.000125348	0.000262146	0.000224389	0.000114131	0	0	0	0	0	0	0	0	1.72e-05	4.4e-05	0	0	0.000623652	0.000163629	0	0	0	0	1.91e-05	5.05e-05	0.000252662	7e-05	0.000168799	1.98e-05	0	0.000190263	3.95e-05	0	0.000552741	2.3e-05	6.65e-05	0	0	0	0	0	0	0	0	0
ZOTU7446	0	2.09e-05	0	0	0.000446286	6.96e-05	0	0	3.8e-05	0	0	0	0	0	0	0	1.69e-05	6.87e-05	0	0	0	0	0	0	0	0	0	0.000458488	0.000841269	0.000360946	0	3.38e-05	0.000395969	0	0.000317105	1.97e-05	0	5.53e-05	0	0	0	0	0	0	0	0	0	0	0
ZOTU3797	0	0	0	0	0	0	0	1.73e-05	5.71e-05	0	0	0	0	0	0	0	0	0	0	0	0	0	0	0	0	0	0	0	0	0	2.33e-05	6.75e-05	0	0	0	5.92e-05	0	0	0	8.87e-05	8.18e-05	0	9.52e-05	0	0	0	0	0	0.00264377
ZOTU4113	0	6.28e-05	0	0	0	0.000153203	0.000109228	0.000655907	0.000684788	0	0	0	0	0	0	0	0	0	0.000131874	0	0	0	0	0	0	0	0	0	0	9.02e-05	0.000279949	0.000270079	0	0	0	0.000454088	0	0.000423768	2.3e-05	4.43e-05	2.05e-05	0	0	0	0	0	0	0	0
ZOTU2843	0.0011321	0.000376577	0	0	0	0	0	0	0	0.000246015	0.000181709	0	0	0	0	0	0.000152393	0.000979213	0	0	0	1.69e-05	0	0	0	0	0	0	0	0	2.33e-05	0	0	0	0	0	0	0	0	0	0	0	1.9e-05	0	0	0	0	0	0
ZOTU11954	0	0	0	0	0	4.18e-05	0	8.63e-05	0.000133153	0	0	0	0	0	0	0	0	0	0	0	0	0	0	0	0	0	0	0	0	3.61e-05	2.33e-05	3.38e-05	0	0	0	0.000157944	0	0	0.000345288	0.00048761	8.18e-05	1.87e-05	9.52e-05	0.000211816	0.000626828	0.000857776	0.000122597	3.67e-05	0
ZOTU3850	0	0	0	0	0	0	0	0	0	0	0	0	0	0	0	0	0	0	0	0	0	6.74e-05	9.82e-05	0.000256016	0	0.0027028	0	0	0	0	0	0	0	0	0	0	0	0	0	0	0	0	0	0	0	0	0	0	0
ZOTU2807	0	0.0030963	2.67e-05	0	0	0	0	0	0	0	0	0	0	0	0	0	0	0	0	0	0	0	0	0	0	0	0	0	0	0	0	0	0	0	0	0	0	0	0	0	0	0	0	0	0	0	0	0	0
ZOTU3585	0	0	0	0	1.59e-05	0	0	6.9e-05	1.9e-05	0	0	0	0	0	0	0	0	0	0	0	0	0	0	0	0	0	0	0	0	0	4.67e-05	0.000101279	0	0	0	0.000217172	0	0.00256103	2.3e-05	6.65e-05	0	0	0	0	0	0	0	0	0
ZOTU3522	6.66e-05	0.00284525	5.35e-05	0	0	0	0	0	0	0	0	0	0	0	0	0	0	0	0	0	0	1.69e-05	0.000130903	0	0	0	0	0	0	0	0	0	0	0	0	0	0	0	0	0	0	0	0	0	0	0	0	0	0
ZOTU5306	0	6.28e-05	0	0	9.56e-05	6.96e-05	0.000152919	0.000224389	3.8e-05	1.64e-05	0	0	0	0	0	0	1.69e-05	0.000120254	4.4e-05	0	0	0	0	0	0	0	0	0.000191037	0.000487936	0.000306804	0.00048991	0.000101279	0.000158388	8.61e-05	4.23e-05	5.92e-05	4.31e-05	0.000239521	0	6.65e-05	0	0	0	0	0	0	0	0	0
ZOTU2402	0.000119869	4.18e-05	0	0	0.000318776	9.75e-05	0.000109228	5.18e-05	1.9e-05	0	0.000153754	0.00161477	0	0	0	0	0.00013546	8.59e-05	0	0	0	1.69e-05	1.64e-05	0	0	0	0	3.82e-05	3.37e-05	1.8e-05	0	3.38e-05	7.92e-05	0	8.46e-05	1.97e-05	0	0	0	0	0	1.87e-05	0	0	0	0	0	0	0
ZOTU2164	2.66e-05	0	0	0	0	0	0	0	0	0	0	0	0	0	0	0	0.00101595	0.000188971	0	0	0	0.000825917	0.00104722	0	0	0	0	0	0	0	0	0	0	0	0	0	0	0	0	0	0	0	0	0	0	0	0	0	0
ZOTU3011	0.000226419	0.00198749	0	0	0	0	0	0	7.61e-05	0	0	0	0	0	0	0	0	0.000292046	6.59e-05	0	0	0	0	0	0	0	0	0	0	3.61e-05	7e-05	0	0	0	0	0	0	0	0.000138115	8.87e-05	0.000122719	0	0	0	0	0	0	0	0
ZOTU10887	0	0	0	0	0	4.18e-05	0	0	0.00030435	0	0	0	0	0	0	0	0	0	0	0	0	0	0	0	0	0	0	0	0	0	0	0	0	0	0	7.9e-05	0	0	0.000322269	0.000221641	8.18e-05	1.87e-05	0.00015234	0.000136168	0.000104471	0.000571851	0	0	0
ZOTU11579	0	0	0	1.63e-05	0	0	0	0	0	0	0	0	0	0	0	0	0	0	0	0	0	0	0.000392709	0.000566893	6.72e-05	0	0.00205711	0	0	0	0	0	0	0	0	0	0	0	0	0	0	0	0	0	0	0	0	0	0
ZOTU5298	0	0	0	0	0	0	0	0	0	0	0	0	0	0	0	0	0	0	0	0	0	0.00128101	0.000278169	0.000969205	0.00057093	0	0	0	0	0	0	0	0	0	0	0	0	0	0	0	0	0	0	0	0	0	0	0	0
ZOTU6591	0	0.000209209	0	0	0	0	0	0	0	0	0	0	0	0	0	0	0	0	0	0.000411903	0.00146153	0.00074164	0.000163629	9.14e-05	0	0	0	0	0	0	0	0	0	0	0	0	0	0	0	0	0	0	0	0	0	0	0	0	1.99e-05
ZOTU11706	0	0	0	0	0	0	0	0	0	0.00034442	0.00275359	0	0	0	0	0	0	0	0	0	0	0	0	0	0	0	0	0	0	0	0	0	0	0	0	0	0	0	0	0	0	0	0	0	0	0	0	0	0
ZOTU5028	0	0	0	0	6.38e-05	0.000194986	2.18e-05	0.000138086	0.000456525	0	0	0	0	0	0	0	0	0	0	0	0	0	0	0	0	0	0	0	1.68e-05	1.8e-05	0.000163303	0.000573917	0	0	0	0.000138201	0	0.00130815	0	0	0	0	0	0	0	0	0	0	0
ZOTU5507	0	0	0	0	0	0	0	0	0	0	0	0	0	0	0	0	0	0	0	0	0	0	0	0	0	0	0	0	0	3.61e-05	0	0	0	0	0	3.95e-05	0	0	2.3e-05	2.22e-05	0	0	3.81e-05	4.54e-05	0.000121883	0	2.45e-05	0.000807458	1.99e-05
ZOTU10906	0	0	0	0	0	1.39e-05	0	0	0	0	0	0	0	0	0	0	0	0	0	0	0	0	0	0	0	0	0	0.000324762	6.73e-05	0.000342898	2.33e-05	0	0.00229662	0	2.11e-05	0	0	0	0	0	0	0	0	0	0	0	0	0	0
ZOTU13536	2.66e-05	2.09e-05	0	0	6.38e-05	0.000264624	0.000371374	0.000172607	0.000190219	0	0	0	0	0	0	0	1.69e-05	3.44e-05	0	0	0	6.74e-05	0	0	0	0	0	1.91e-05	8.41e-05	5.41e-05	0.000233291	0.000168799	0	2.15e-05	4.23e-05	3.95e-05	0.00107666	3.68e-05	4.6e-05	0	0	1.87e-05	1.9e-05	0	0	0	0	0	0
ZOTU2578	0	0	0	0	0	0	0	0	0	0	1.4e-05	0.00305539	0	0	0	0	0	0	0	0	0	0	0	1.83e-05	0	0	0	0	0	0	0	0	0	0	0	0	0	0	0	0	0	0	0	0	0	0	0	0	0
[truncated: 3,264 more rows]
[truncated: 12 more columns]
