# Supplementary material for: Interactions between temperature and energy supply drive microbial communities in hydrothermal sediment
Source: Commun Biol. 2021 Aug 25;4:1006. doi: 10.1038/s42003-021-02507-1 (PMC8387401; doi:10.1038/s42003-021-02507-1)
Supplement: Supplementary file 7 — Supplementary Data 4 [file 42003_2021_2507_MOESM7_ESM.xlsx]

## Sheet: otu_arc_final_supp
Sample ID	CH-01	CH-05	CH-15	CH-20	CH-25	CS-01	CS-05	CS-15	CS-25	CS-40	EM-01	EM-03	EM-05	EM-06	EM-07	EM-08	EM-10	YW-01	YW-05	YW-15	YW-25	YW-35	OM-01	OM-05	OM-15	OM-20	OM-25	OM-30	GC13-26	GC13-76	GC13-176	GC13-326	GC13-476	MUC02-01	MUC02-05	MUC02-15	MUC02-30	MUC02-38	MUC12-01	MUC12-03	MUC12-07	MUC12-11	MUC12-17	MUC12-30	GC09-37	GC09-137	GC09-237	GC09-337	GC09-387
ZOTU6081	0	7.71361e-06	1.37675e-05	0.000632454	0.0112464	0	1.17191e-05	0	0	0	0.0240503	0.547464	0.900309	0.677533	0.53166	0.753085	0	0	0	1.72429e-05	4.94274e-06	0.0971018	8.11234e-06	0	0	0	0	0	2.94308e-05	0	0	0	0	4.37195e-06	0	0	0	1.02013e-05	0	5.20005e-06	0	0	1.37125e-05	0	0	0	0	0	9.68626e-06
ZOTU1748	0.0152605	0.0239276	1.37675e-05	1.80701e-05	0	0.0435294	0.104792	0.0609478	0.0393436	0.0247981	0.0204632	0.000696266	0	0.0131369	1.544e-05	0	3.1503e-05	0.0181899	0.096244	0.0373308	0.00232803	0	0	0	1.11838e-05	0	0	1.09304e-05	0.128642	0.0721071	0.0883193	0.11181	0.0427851	0.010908	0.0435087	0.0415859	0.0373241	0.0349802	0.0110814	0.0827223	0.111272	0.0691214	0.131421	0.125531	0.016993	0.00345719	2.69138e-05	0	0.258294
ZOTU7785	0.00949543	0.0295431	0	1.80701e-05	0.000105107	0.00174941	0.0369151	0.0775641	0.111008	0.0908141	0.000216669	2.48667e-05	0	1.67777e-05	9.26398e-05	0	3.1503e-05	0.00590894	0.0290189	0.0936115	0.0936649	0.0781279	0.00038128	0.000113046	0	0	0	1.09304e-05	0.0739008	0.059948	0.0885638	0.104398	0.124771	0.00531192	0.0137331	0.0686581	0.0767349	0.0681547	0.00170033	0.00863728	0.0164507	0.0365923	0.0256836	0.0260411	0.0548425	0.000442067	0	0	0
ZOTU1466	0.0193784	0.0396094	0	1.80701e-05	4.50457e-05	0.0532761	0.0893228	0.102621	0.0294539	0.0161254	0.0133131	0.000795733	0	1.67777e-05	6.17598e-05	0	0	0.0200978	0.0752338	0.034934	0.0448109	0.0624465	8.11234e-06	8.07474e-06	2.23676e-05	0	0	0	0.0079316	0.00495231	0.0018666	0.000351476	0.000110842	0.019136	0.0652631	0.0848762	0.0717045	0.0536179	0.0359609	0.141181	0.164154	0.0597015	0.0913255	0.0295063	0	1.1335e-05	8.97127e-06	0	0
ZOTU884	0	7.71361e-06	0	5.42103e-05	0	0	5.85954e-05	7.14679e-06	0	0.000161254	0	0	0	0	0	0.000129147	0.000157515	0	2.5344e-05	1.72429e-05	0	0	8.11234e-06	1.61495e-05	0	0	0	0	2.94308e-05	3.85394e-05	0	0	0.000203211	4.80914e-05	0	7.17618e-05	1.24207e-05	3.06038e-05	2.60586e-05	0	0	5.72292e-05	0	0.000221187	2.45563e-05	0.000827458	0.603237	0.0533396	0
ZOTU1366	0.00364557	0.00642544	0	1.80701e-05	0	0.0165973	0.052771	0.0334898	0.0444317	0.0212575	0.00568154	0.00106927	5.92796e-05	0.000150999	0	0	0	0.00707591	0.0383455	0.0156738	0.00540736	0	0.00013791	2.42242e-05	0	1.24278e-05	0	0	0.115766	0.083245	0.111707	0.132627	0.0561046	0.00544745	0.0202491	0.0207391	0.0225932	0.0297163	0.00438436	0.0266502	0.0536852	0.0587744	0.120396	0.141456	0.0213395	0.00520278	1.79425e-05	0	0.0016951
ZOTU7760	0.0171863	0.00953402	0	0	0	0.0016318	0.0249382	0.0629703	0.0754622	0.0551699	0.000337041	1.24333e-05	0	0	0	0	3.1503e-05	0.00455674	0.0323263	0.119493	0.00389982	0.00344135	0	8.07474e-06	0	1.24278e-05	0	0	0.061893	0.0611427	0.0665439	0.159861	0.0338069	0.00269749	0.00546437	0.0295479	0.0537318	0.0565048	0.000807818	0.0189542	0.0151762	0.0424068	0.0888983	0.0984871	0.00250475	0.000192696	0	0	1.93725e-05
ZOTU22	6.05576e-05	0.000123418	0.00086735	0.000144561	0	0	0	0	7.1664e-05	0	0.0239299	0.0746746	0.000592796	0.0436052	0	1.43497e-05	0.84406	0	0	0.0001207	0	0	0.000584088	0.00411004	0.000178941	3.72833e-05	0	0	0	0	0	0	0	0	0	0	0	0	0	0	0	0	0	0	0	0	0	0	0
ZOTU17	4.84461e-05	0.000408821	0	0	0	0	0	7.14679e-06	0	0	0.00560932	0	5.92796e-06	0	0	0	6.3006e-05	0	0	0	0	0	0.0136936	0.289746	0.331846	0.226707	0.0401053	0.0647735	0	0	0	0	0	0	0	0	0	0	6.51466e-06	0	1.96075e-05	1.14458e-05	0.00122042	1.47458e-05	0	0	0	0	0
ZOTU930	2.4223e-05	0	0	0	0	0.000102906	2.34381e-05	0	0.00114662	0.00436788	0	1.24333e-05	0	0	0	1.43497e-05	3.1503e-05	0	7.60321e-05	0.00101733	0	0	0	1.61495e-05	0	0	0	0	0.00326682	0.00105983	0.00317921	0.000873669	0.00258632	0.000118043	6.18608e-05	8.97022e-05	0.000397461	0.0015812	0	1.04001e-05	1.96075e-05	0.0023464	0	0	0.00515683	0.208349	0.0220962	0.000698509	9.68626e-06
ZOTU8302	0.00524429	0.00499071	0	7.22804e-05	0	0.0708584	0.0110276	0.000192963	0.00071664	0.000995569	0.00618711	0	0	0	0	4.3049e-05	0.000157515	0.0105768	0.0232151	0.000775929	0	0.0203691	4.05617e-05	8.07474e-06	0	0	0	0	0.000397316	0.000423933	0.000209618	0.000100422	3.69474e-05	0.289047	0.0453027	0.0335486	0.000298096	0.00107113	0.293166	0	0.00015686	0.0021976	0	0.000604577	9.00399e-05	0	0	0	0
ZOTU1207	0.00729114	0.00692682	0	0	1.50152e-05	0.00451318	0.0636228	0.0608549	0.12491	0.074843	0.00243151	0	0	0	1.544e-05	0	3.1503e-05	0.00546438	0.056796	0.0252436	0.00903038	0	0	0	0	0	0	0	0.0123757	0.0112728	0.0142341	0.00630649	0.00179195	0.00323087	0.00927912	0.0277359	0.0755425	0.0649617	0.0017785	0.0168741	0.0262936	0.0558214	0.00279736	0.00654713	0.00581167	0	0	0	0
ZOTU5747	0.000290677	0.000408821	5.50699e-05	0	0	0	2.34381e-05	5.00275e-05	0	0	0.000962974	0	5.92796e-06	0	0	0	0	0.00011114	0	0	0	0	0.635229	0.101806	0.00556954	0.00154104	0.00108293	0.00192375	4.41462e-05	0	0	0	0	0	0	1.79404e-05	0	0	0	0	0	1.14458e-05	0.0016455	0.00129763	0	0	0	0	0
ZOTU899	0.000460238	0.00169699	0	1.80701e-05	0	0.0015583	0.0107581	0.0141506	0.0205676	0.0383504	0.00117964	0	0	0	0	0	3.1503e-05	0.000463083	0.0048914	0.00375894	0	0	0	0	0	0	0	0	0.0130526	0.0089604	0.00662295	0.000793332	0.00247548	0.00210291	0.00383537	0.016254	0.0297972	0.0358983	0.00138762	0.0710794	0.0630576	0.0302056	0.0401503	0.0616079	0	0	0	0	0.250942
ZOTU266	4.84461e-05	0	0	0	0	0.00016171	0.000234381	0.000100055	0.00150494	0.0067867	0.000216669	0	0	0	1.544e-05	0	0	1.85233e-05	6.33601e-05	0.000689715	0	0	0	0	0	0	0	0	0.00902054	0.0317757	0.0388493	0.0101125	0.128448	0.000249201	2.06203e-05	0.00224255	0.000471985	0.00255032	9.77199e-05	0	0.000392149	0.00448677	0	0	0.281841	0.00724309	0.00123803	0	9.68626e-06
ZOTU1144	1.21115e-05	0.000462817	1.37675e-05	0	0	0	0	0	0	0	0.0192595	0	0	0	0	0	3.1503e-05	1.85233e-05	0	1.72429e-05	0	0	0.00192262	0.0343499	0.186244	0.207332	0.182744	0.0724576	0	0	0	0	0	0	0	0	0	0	0	0	0	0	0.00504621	0.00056034	0	0	0	1.20433e-05	0
ZOTU8383	0.000290677	0.00185127	0.0527294	0.117474	0.000165168	0	1.17191e-05	0	0	0	0.0517117	0.0515983	0.000764707	0.0124323	3.08799e-05	0	0	0	0.000202752	0.0431072	0.184552	0.0391198	0.0168737	0.0892097	0.00569256	0.00200087	0.00135366	0.00146467	0	0	0	0	0	0	2.06203e-05	0	0	0	0	0	0	0	0.00179634	0.00171051	1.63709e-05	1.1335e-05	0	0	0
ZOTU323	4.84461e-05	0	0	0	0	2.94018e-05	4.68763e-05	4.28807e-05	0.00193493	0.0134191	0	0	0	0	0	0	0	1.85233e-05	0.000152064	0.0013277	0	0	0	8.07474e-06	0	0	0	0	0.0255165	0.0135851	0.0204977	0.0199237	0.134877	0.000131158	0.000103101	0.00125583	0.000198731	0.00451916	0.000136808	0	0.000333327	0.00552834	1.37125e-05	0	0.152004	0.0878126	0.00375896	1.20433e-05	1.93725e-05
ZOTU4102	6.05576e-05	0.000308544	1.37675e-05	0	0	0.00048513	0.000421887	2.14404e-05	0.00250824	0.00744573	0.000577784	0	0	0	1.544e-05	0	0	0	0.000557569	0.000706957	0	0	0	0	0	0	0	0	0.000647478	0.00385394	0.00650816	0.0012151	0.000110842	0.000284177	0.000103101	0.00145318	0.00100607	0.00540667	0.000814332	0	0.000784298	0.0100838	0	1.47458e-05	0.0685941	0.134649	0.0022159	0	0
ZOTU974	0.00109004	0.00387223	1.37675e-05	0	7.50762e-05	0.000294018	0.00332822	0.0151297	0.0178443	0.0255623	0	1.24333e-05	0	0	0	0	0	3.70466e-05	0.00145728	0.0277955	0.0966898	0.125972	8.11234e-06	0	0	0	0	0	0.0308582	0.0124675	0.0260027	0.0205463	0.0266945	0.000380359	0.00107225	0.0132042	0.0275863	0.0174646	0.000117264	5.72005e-05	0.000745083	0.00566569	0.00234484	0.00594255	0.00790714	1.1335e-05	0	0	0
ZOTU41	0.0152484	0.00215981	1.37675e-05	0	0	0	0	0	0	0	0.238192	0.000584366	0.00340858	0.0880325	0	1.43497e-05	0.152569	0.000185233	0.000215424	0.0032589	0	1.86019e-05	0	0	1.11838e-05	0	0	0	0	0	0	0	0	0	0	0	0	0	0	0	1.96075e-05	0	0	0	0	0	0	0	0
ZOTU39	0	0	0.00256075	0.000343332	0	0	0	0	0	0	0.00873899	0.0414154	0.000456453	0.0176837	0.428351	0	0	0	0	0	0	0	8.92357e-05	0	0	0	0	0	0	0	0	0	0	0	0	0	0	0	0	0	0	0	0	0	0	0	0	0	0
ZOTU1399	0	0	0.000743443	0.00135526	0	0	0	0	0	7.01105e-06	0.00180558	0.0008579	0	0	0	0	0	0	0	6.89715e-05	4.94274e-06	0	0.000421842	0.00587034	0.0841134	0.0949108	0.139464	0.166098	0	0	0	0	1.84737e-05	0	2.06203e-05	0	0	0	0	0	0	0	1.37125e-05	0	0	0	0	1.20433e-05	9.68626e-06
ZOTU929	0.00383935	0.00614775	0	1.80701e-05	4.50457e-05	0.00310189	0.0191138	0.0167592	0.0144761	0.0098996	0.00491117	0	0	0	0	0	0	0.00633498	0.0487493	0.0364514	0.0361413	0.099148	0	0	0	0	0	0	0.0111984	0.012718	0.00421732	0.00515164	0.00617022	0.00334891	0.0114649	0.0123968	0.0195625	0.01571	0.00169381	0.00689526	0.0135291	0.0238646	0.0154952	0.0119588	0.000155524	0.000192696	8.97127e-06	0	0
ZOTU1013	0	0	0	0	0	0	0	0	0	0	0	0	0	0	0	0	3.1503e-05	0	0	1.72429e-05	0	1.86019e-05	0	0	0	0	0	0	0	0	0	0	0	0	0	0	0	0	0	0	0	0	0	0	0	0	6.27989e-05	0.0728617	9.68626e-06
ZOTU12	0	0	0.00121154	0.0215757	0.0309014	0	0	7.14679e-06	0	0	0.00216669	0.0605379	0.00270908	3.35554e-05	1.544e-05	1.43497e-05	0	0	7.60321e-05	0.00262092	0.27275	1.86019e-05	3.24494e-05	6.45979e-05	0.00194598	0.00615174	0.0140166	0.0257848	0	0	0	1.00422e-05	0	0	0	0	0	0	0	0	0	0	0	0	0	0	0	0	0
ZOTU203	0	0	0	0	0	0	0	0	0	0	0	0	0	0	0	0	9.4509e-05	1.85233e-05	0	0	0	0	0	0	0	0	0	0	0	0	0	0	1.84737e-05	0	0	0	0	0	0	0	0	0	0	0	0	0	0	0.000385384	0.39826
ZOTU905	6.05576e-05	0.000239122	0.0131479	0.0306108	0.0244448	0	0	0	0	0	0.0154076	0.111552	0.00410215	0.0364747	0	2.86993e-05	3.1503e-05	0	7.60321e-05	0.0119838	0.0182387	0.0562149	0.00829892	0.0338332	0.0270313	0.0269185	0.00514392	0.00438309	1.47154e-05	0	0	0	0	0	0	0	0	0	0	0	0	0	0.000781614	0.000250678	0	1.1335e-05	0	0	0
ZOTU9327	0	0	0	0	0	0	1.17191e-05	0	0	0	0	0	0	0	0	0	0	0	3.80161e-05	0	0	0	0	0	0	0	0	0	0	0	6.48819e-05	0	0	0	0	0	0	0	0	0	0	5.72292e-05	0	0	2.45563e-05	0	0	0	0
ZOTU1312	0.00861129	0.0255012	0.284353	0.0915974	0	0	0	0	0	0	0	0	0	0	0	0	0	0	0	0.000569015	0	0	0.0113573	0.00286653	0.000123022	9.94221e-05	0	0	0	1.92697e-05	0	0	0	0	6.18608e-05	0	0	0	0	0	0	0	0	0.000206441	0	0	0	1.20433e-05	0
ZOTU4350	0	0	0.000151442	0.0061077	0.136113	0	0	0	0	0	0.00202224	0.0357955	0.0438906	0.0546952	0.000355119	0.128128	0	0	0	0.0022933	4.94274e-06	0.000111611	9.73481e-05	0	0	2.48555e-05	0.00113215	0.000579311	0	0	0	0	0	0	0	0	0	1.02013e-05	0	0	0	0	0	0	0	0	0	0	0
ZOTU9089	0.00118693	0.0068574	1.37675e-05	0	1.50152e-05	0.00377813	0.0234147	0.00743266	0.018131	0.0169597	0.0017815	1.24333e-05	0	0	0	0	0	0.00253769	0.0242416	0.0142081	0	0	0	0	0	0	0	0	0.0166726	0.0213893	0.0108353	0.0168407	0.0103822	0.00264503	0.00649538	0.0175099	0.0215623	0.0258092	0.00108143	0.00207482	0.0367836	0.0330899	0.0205962	0.0345494	0.00103955	0	0	0	0
ZOTU9432	0	0	0	0	0	0	0	0	0	0	2.40743e-05	0	0	0	0	0	0	0	0	0	0	0	0.000389392	0.0217533	0.0978359	0.0803952	0.114741	0.0808959	0	0	0	0	0	0	0	0	0	0	0	0	0	0	0	0	0	0	0	1.20433e-05	9.68626e-06
ZOTU6123	0	0	0	0	0	0.000102906	8.20335e-05	2.14404e-05	0.00164827	0.00516013	0	0	0	0	0	0	0	1.85233e-05	0	0	0	0	0	0	0	0	0	0	0.0001913	0.00379613	0.00504083	0.00763205	0.0366888	8.7439e-06	0	0.00113025	0.000832184	0.0024177	0	0	0.000176467	0.00414339	0	0	0.020038	0.104838	0.00690787	0.0104295	0
ZOTU8111	0.00185306	0.000524525	0	1.80701e-05	0	0.0177587	0.00244929	0.000278725	0.00136162	0.00020332	0.0016852	0	0	0	0	1.43497e-05	3.1503e-05	0.00209314	0.00378893	5.17286e-05	0	0.00029763	0.00010546	3.2299e-05	0	0	3.69181e-05	0	2.94308e-05	0.000134888	6.98728e-05	0	0.000184737	0.15102	0.0149909	0.0150879	0.000496827	0.00113234	0.143322	0.00286523	0.00178428	0.000114458	0.00133012	2.94916e-05	2.45563e-05	0	8.97127e-06	0	0
ZOTU2308	0.0333672	0.159448	2.75349e-05	0	0	0.000352822	0.00480482	0.0045668	0.00035832	0.000960514	0.000481487	0	0	1.67777e-05	0	0	0	0.0011114	0.0286388	0.0959393	0	0.013598	0.000559751	0.000250317	2.23676e-05	0	0	0	0.000647478	0.00111764	0.00210617	0.00517172	0.00120079	0	4.12405e-05	0.000627915	0.000782502	0.000306038	0	0	0	6.8675e-05	0.00196089	0.00219712	0	0	0	0	0
ZOTU4160	0.000993145	0.00199782	0	1.80701e-05	0	0.00558635	0.0113675	0.0255355	0.0211409	0.00700404	0.00182965	0.00110657	0	0	0	0	0	0.00159301	0.0136224	0.0128977	4.94274e-05	0	3.24494e-05	8.07474e-06	0	0	0	0	0.0156425	0.0109066	0.0154269	0.0115887	0.00404574	0.00193677	0.00686655	0.00678149	0.0111662	0.0156487	0.00197394	0.0317203	0.0185094	0.0202134	0.0212818	0.0221629	0.00266846	0.000192696	3.58851e-05	0	0.00274121
ZOTU1001	0.00071458	0.00155044	0	0	0	0.00307249	0.0215982	0.0138219	0.0125412	0.00921252	0.000987048	0.00113143	5.92796e-06	0	0	0	0	0.00100026	0.0138378	0.000896629	0	0	0	0	0	0	0	0	0.00928542	0.00774641	0.00126769	0.000471982	0.00142248	0.00309971	0.0158776	0.0145676	0.0264063	0.017995	0.00100326	0.0267074	0.026823	0.0296562	0.0160299	0.0245222	0.0084965	0.00308313	0	0	0
ZOTU8283	0.00248286	0.0106371	0	1.80701e-05	0	0.0159211	0.0287703	0.0168521	0.00472983	0.00372287	0.00813713	0	0	0	0	0	0	0.00196347	0.0293484	0.00831106	0	0	8.11234e-06	0	0	0	0	0	0.000161869	0.000192697	0	0	0	0.00682461	0.0248062	0.020793	0.0147185	0.0134963	0.00381107	0.024227	0.0335876	0.014044	0.0172229	0.0145393	0	0	0	0	0
ZOTU60	0.000193784	0	0	0	1.50152e-05	0.000117607	0.00154692	0.00137933	0.0153361	0.0737072	0	0	0	0	0	0	6.3006e-05	0	0.000671617	0.00462109	0	0	0	8.07474e-06	0	1.24278e-05	0	0	0.00158926	0.00371905	0.0002745	0.000130548	0.000221684	0.000113671	0.000164962	0.00371367	0.00767597	0.0247891	0.000742671	8.32007e-05	0.0121566	0.0687895	0.014549	0.0379556	0.00590171	0.00867131	8.97127e-06	0	0
ZOTU7784	0	0	0	0	0	0	0	0	0	0	0	0	0	0	0	1.43497e-05	0	0	0	0	0	0	0	0	0	0	0	0	0	0	0	0	0	0	0	0	0	0	6.51466e-06	0	0	0	0	0	0	0	0.0107386	0.0482212	0
ZOTU1184	0	7.71361e-06	0	1.80701e-05	0	0	0	7.14679e-06	0	7.01105e-06	0	0	0	0	0	1.43497e-05	0	0	0	6.89715e-05	0	0	8.11234e-06	0	0	1.24278e-05	0	0	0	0	0	0	0	0	0	0	0	0	0	0	0	0	0	0	0	0	0.0456458	0.0345762	9.68626e-06
ZOTU112	0	0	0	0	0.0130182	0	0	0	0	0	2.40743e-05	0	0	0	0	0	0	1.85233e-05	0	0	0	0	7.30111e-05	0.000274541	0.00164402	0.0183434	0.0668217	0.0668503	1.47154e-05	0	0	0	0	0	0	0	0	0	0	0	0	0	0	0	0	0	0	0	9.68626e-06
ZOTU8053	0	7.71361e-06	0	0	0	0	0	0	0	7.01105e-06	0	0	0	0	0	1.43497e-05	3.1503e-05	0	0	0	0	0	8.11234e-06	0	0	0	0	2.18608e-05	0	0	0	0	0	0	0	1.79404e-05	0	0	0	0	0	0	0	0	0	0	0.012183	0.0435123	0
ZOTU8015	0	7.71361e-06	0	0	0	0	0	7.14679e-06	0	0	0	0	0	0	0	0	0	0	0	0	0	0	0	0	0	0	0	1.09304e-05	0	0	0	0	0	0	0	0	0	0	0	0	0	0	0	0	0	0	0.000134569	0.00387793	0
ZOTU293	0	0	0	0	0	0	0	0	0	0	2.40743e-05	0	0	0	0	0	0	0	0	0	0	0	0	0	0	0	0	0	0	0	0	0	0	0	0	0	0	0	0	0	0	0	0	0	0	0	0.00851373	0.0900113	0
ZOTU6379	0	0	0	0	0	1.47009e-05	0.000187505	0	0.00207826	0.0194837	0	0	0	0	0	0	0	0	3.80161e-05	0.000293129	0	0	0	0	0	0	0	0	0.0366266	0.0319877	0.0242858	0.0163286	0.0373354	0.000598957	0.000268063	0.0109257	0.000397461	0.00286656	0	0	0.000254897	0.00366267	0	0	0.0285427	0.000827458	8.97127e-06	0	0
ZOTU1042	0	0.000239122	0.000289117	0.00464402	0.210333	0	0	0	0	0	9.62974e-05	0	0	0	0	0	0	0	0	6.89715e-05	0.00251091	0	5.67864e-05	0.00112239	0.00184533	0.0103772	0.0212771	0.0149528	0	0	0	0	0	0	2.06203e-05	0	0	1.02013e-05	0	0	0	0	0	0	0	0	0	0	0
ZOTU202	0	0.000501385	0.00227163	0.000307192	0	0	0	0	0	0	0.00110742	0	0	0	0	0	0	0	1.2672e-05	0	0	0	0.0443177	0.0031976	0.00032433	1.24278e-05	0.000258427	0	0	0	0	0	0	0	0	0	0	0	0	0	0	0	0	0	0	0	0	0.0427174	0
ZOTU1017	0	0	2.75349e-05	0	0	0	1.17191e-05	0	7.1664e-05	0.000224354	0.000962974	0	0	0	0	0	0	0	0	0	0	3.72038e-05	0.000454291	1.61495e-05	0	0	0	0	0	7.70787e-05	0	0	0	0	0	0	2.48413e-05	4.08051e-05	4.56026e-05	0	0	0.000251808	0	1.47458e-05	0	0.185883	8.07414e-05	0.000301081	0
ZOTU320	0.00816317	0.0225392	0	0	0	0.00235215	0.0119417	0.0120066	0.00308155	0.00356862	0.00782416	0	0	0	0	1.43497e-05	0	0.00796503	0.0783131	0.0174325	0	0	0	0	0	0	0	0	0.00278121	0.00123326	0.000234573	2.00844e-05	0.000166263	0.00161325	0.00938222	0.00857553	0.00570108	0.00713069	0.00085342	0.0104417	0.00835278	0.00584882	0.0132052	0.00287543	0	0	0	0	0
ZOTU74	0.067546	0.00344027	0	0	0	0.000926157	0.00207428	0.000643211	0.000143328	0.000175276	0.0443209	0.0010444	0.00026083	0	0	0	0	0.112863	0.0106698	0.0002414	0	0	4.05617e-05	1.61495e-05	0	2.48555e-05	0	0	0.000279593	0	2.99455e-05	5.02109e-05	0	0.000196738	0.0019383	0.00080732	0.000347779	0.000142818	0.000351792	0	0.00286269	6.8675e-05	0.000191975	0.000117966	0	0	0	0	1.93725e-05
ZOTU252	0	0	0	1.80701e-05	0	0	0	0	0	0	0	0	0	0	0	1.43497e-05	0	0	0	1.72429e-05	0	0	0	0	0	0	0	0	0	0	0	0	0	0	0	0	0	0	6.51466e-06	0	0	0	0	0	0	0	0.00750895	0.0330106	0
ZOTU4156	0	0.00150415	0	0	0	0.000191112	0.00165239	0.00251567	0.0278056	0.0364645	0	0	0	0	0	0	0	0	0.000430849	0.00522459	0	0	1.62247e-05	0	0	0	0	0	0.0218082	0.0253011	0.019774	0.0186584	0.00655816	0.000638304	0.000597987	0.00658414	0.0154513	0.0212799	9.12052e-05	0	0.00180389	0.0103585	0.00250939	0.0059573	0.0128348	9.06803e-05	0.000269138	0	0
ZOTU98	0	0.000331685	0.101893	0.134405	0	0	0	0	0	0	0	0	0	0	1.544e-05	0	0	0	0	0.00163807	0.00270368	0	0.000438066	1.61495e-05	0	0	0	0	0	1.92697e-05	0	0	0	0	4.12405e-05	0	0	0	0	0	0	0	0	0	0	0	0	0	0
ZOTU1315	0	0	0	1.80701e-05	0	8.82055e-05	2.34381e-05	0	0.00035832	0.00210331	0	0	0	0	0	0	0	0	0	0	0	0	0	0	0	0	0	0	0.0110218	0.0754793	0.0196592	0.0489255	0.0549777	0	0	0.000556154	0.000161469	0.000550869	3.25733e-05	0	0	0.00101868	0	0.00340628	4.91127e-05	0.0075378	0	0	0
ZOTU3504	8.47807e-05	0.000516812	0.0529221	0.10871	4.50457e-05	0	0	0	0	0	0.00264818	0.000957366	1.77839e-05	0.000570441	1.544e-05	0	0	0	1.2672e-05	0.00575912	0.0264041	0.00130213	0.00418597	0.0191937	0.000782866	0.000211272	0.000369181	0.000371633	0	0	0	0	0	0	6.18608e-05	0	0	0	0	0	0	0	6.85627e-05	2.94916e-05	0	0	0	0	0
ZOTU586	0	0	0	0	0	0	0	0	0	1.40221e-05	0	0	0	0	0	0	0	0	0	0	0	0	0	0	0	0	1.2306e-05	0	0	0	0	0	0	0	0	0	0	0	0	0	0	1.14458e-05	0	0	0	0	0	0.119565	0
ZOTU8459	9.68922e-05	0.000223695	0	0	0	0	0.00037501	0.00140792	0.0115379	0.0195538	0	0	0	0	0	0	3.1503e-05	1.85233e-05	0.000494209	0.00324166	0	0	0	0	0	0	0	0	0.0127583	0.0176125	0.0550598	0.000873669	0.00116384	0.000266689	0.000268063	0.00353427	0.00390009	0.00636559	0.000286645	0	0.00186271	0.00913378	0.0372158	0.0157338	0.00243108	0	0	0	0
ZOTU8290	0.00498995	0.00202868	0	0	0	0.000382224	0.00664471	0.012171	0.0164827	0.0153822	0	0	5.92796e-06	0	0	0	0	0.000407513	0.0022176	0.0163462	0.00152731	0.0130585	2.4337e-05	0	0	0	0	0	0.00747543	0.00483669	0.0205476	0.00922876	0.0159982	0.000896249	0.0017321	0.0103516	0.019252	0.0114968	0.000143322	0.000462804	0.00280387	0.00557412	0.00423717	0.00125339	0.00277487	0	0	0	0
ZOTU682	0.000290677	6.94225e-05	0	0	0	0.000264616	0.00328134	0.00546729	0.0394152	0.0195398	0	2.48667e-05	0	0	1.544e-05	0	0	0.00027785	0.000671617	0.0201224	0	0	0	8.07474e-06	0	0	0	0	0.0064012	0.00996242	0.00443692	0.0145812	0.000517264	0.00132907	0.00216513	0.00958019	0.0167555	0.0296551	0.000442997	0	0.000941158	0.0102555	0.00264652	0.00622272	0.000924956	3.40051e-05	0	0	0
ZOTU8424	0.00392413	0.00610146	0	0	0	0.00429267	0.0160083	0.00949093	0.00766805	0.00520921	0.00255188	0	0	0	0	0	0	0.00470492	0.0251666	0.0085697	0	0	0	0	0	0	0	0	0.00179528	0.0025436	0.000394282	0.000733079	0.000609632	0.00254447	0.00880485	0.00701471	0.00970054	0.0128332	0.00190879	0.00359323	0.0222545	0.0229718	0.00551244	0.00843459	0.000163709	0	0	0	9.68626e-06
ZOTU896	0	0	1.37675e-05	0.000234911	0.00818331	0	0	0	0	0	0.00016852	0	0	1.67777e-05	0	0	0	0	0	0	0.00358349	0	3.24494e-05	9.68969e-05	0.00468601	0.0322252	0.0693198	0.0792126	0	0	4.99092e-06	0	0	0	0	0	0	0	0	0	0	0	0	0	0	0	0	0	0
ZOTU880	0.000145338	0.00166614	0.0100503	0.00104807	0	0	0	0	0	0	0	0	0	0	0	0	0	0	0	0.000206914	0	0	0.00419408	0.000395662	0	1.24278e-05	0	0	0	0	0	0	0	0	0	0	0	0	0	0	0	0	0	0	0	0	0	0	0
ZOTU937	0	0	0	0	0	0	0	0	0	0	0	0	5.92796e-06	0	0	0	3.1503e-05	0	0	0	0	0	0	0	0	0	0	0	0	0	0	0	0	0	0	0	0	0	0	0	0	0	0	0	0	0	1.79425e-05	0.0328179	0
ZOTU271	0	0.000107991	0.00569973	0.0276292	0.076893	0	0	0	0	0	9.62974e-05	0	0	0	0	0	0	0	0	0.000706957	0.00564461	0.0019718	0.000210921	0.00467527	0.00230386	0.00782949	0.00132905	0.00139909	0	0	0	0	0	0	2.06203e-05	0	0	0	0	0	0	0	0	0	0	0	0	0	0
ZOTU176	0	0	0	0	0	0	0	0	0	0	0	0	0	0	0	1.43497e-05	0	0	0	0	0	0	0	0	0	0	0	0	0	0	0	0	0	0	0	0	0	0	0	0	0	0	0	0	0	0	0	0	0
ZOTU7996	0.000278565	0.0089555	0.0190955	0.00126491	0	0	0	0	0	0	0.0856565	0.00445113	0	0	0	0.056509	0	0	0	0.000155186	0	0	0.010327	0.000985118	5.5919e-05	0	0	0	0	0	0	0	0	0	0	0	0	0	0	0	0	0	0	0	0	0	0	0	0
ZOTU835	0.000254342	0.000401108	0	0	0	0.000764447	0.00330478	0.00489555	0.0233625	0.0250505	0.000264818	0	0	0	0	0	6.3006e-05	3.70466e-05	0.00101376	0.0038624	4.94274e-06	0	0	0	0	0	1.2306e-05	0	0.00890282	0.0103671	0.00960751	0.00601526	0.00145942	0.000524634	0.00109287	0.00789379	0.0118493	0.017995	3.90879e-05	0.00787287	0.00362738	0.0133344	0.00585525	0.0141117	0.000171894	0	0	0	0
ZOTU1255	0	0	0	0	0	0	0	0	0	0	0	0	0	0	0	0	0	0	3.80161e-05	0.000586257	0.00545184	0.172142	0	0	0	0	0	0	0	0	0	0	0	0	0	0	0	0	0	0	0	0	0	0	0	0	0	0	0
ZOTU1408	0	0	0	0	0.00247751	0	0	0	0	0	0.000288892	1.24333e-05	0	0	0	0	0	0	0	0	0	0	0.000121685	0.0069685	0.0146732	0.0164419	0.0140904	0.0159802	0	0	0	0	0	0	0	0	0	0	0	0	0	0	0	0	0	0	0	0	0
ZOTU63	7.26691e-05	0	0.0282095	0.0337008	0	0	0	0	0	0	0.000216669	0	0	0	0	0	0	0	5.06881e-05	0.0155358	0	1.86019e-05	0.0201835	0.0591071	0.00917072	0.00160318	0.00215355	0.000513729	0	0	0	0	0	0	0	0	0	0	0	0	0	0	0	0	0	0	0	0	0
ZOTU104	0	0.000223695	0	0	0	2.94018e-05	0.000351572	0.000214404	0.00035832	0.000441696	0	0	0	0	0	0	0	3.70466e-05	0.00012672	0.000465557	0	0	0	0	0	0	0	0	0.00247219	0.00485596	0.0356252	0.0603635	0.0174761	3.06036e-05	2.06203e-05	0.00041263	0.000347779	0.000336642	0	0	0.000392149	0.000732534	0	0.000250678	0.000122782	0.0347646	0	0	0
ZOTU4571	0.000375457	0.00275376	0	1.80701e-05	3.00305e-05	0.000220514	0.00394933	0.0080187	0.00988964	0.0102011	0	0	0	0	0	0	0	0.000370466	0.00154599	0.0262436	0.0357311	3.72038e-05	0	0	0	0	0	0	0.00301666	0.00156084	0.00120281	0.000672826	0.000203211	0.000542122	0.000515506	0.0064765	0.0222578	0.0139553	0.000169381	5.20005e-06	0.00176467	0.00363978	0.000932452	0.00259526	1.63709e-05	0	0	0	0
ZOTU8476	0	0	1.37675e-05	0.000433683	0	0	0	0	0	0	0	0	0	0	0	1.43497e-05	0	0	0	0	0	0	0.000754448	0.00093667	7.82866e-05	0.00011185	0.000295345	0	0	0	0	0	0	0	0	0	0	0	0	0	0	0	0	0	0	0	0	0.000204735	0
ZOTU1233	0.000205896	0.00106448	0	0	0	5.88036e-05	0.00371495	0.0033304	0.00781138	0.0182428	0.000216669	0	0	1.67777e-05	0	0	0	0	0.000811009	0.00260367	0	0	0	0	0	0	0	0	0.0198658	0.0106754	0.00259528	0.00317333	0.00587464	0.000467798	0.000639228	0.0121636	0.00816038	0.0137819	0.000136808	0.00445644	0.00286269	0.0115946	0.00959877	0.0100419	0.00255386	0	8.97127e-06	0	0
ZOTU392	0	0	0	0	0	0	0	0	0	0	0	0	0	0	0	0	0	0	0	0	0	0	0	0	0	0	0	0	0	0	0	0	0	0	0	0	0	0	0	0	0	0	0	0	0	0	0	0	0
ZOTU886	0	0	0	0	0	0	0	0	0	7.01105e-06	0	0	0	0	0	0	0	0	0	1.72429e-05	0	0	0	0	0	0	0	0	0	0	0	0	0	0	0	0	0	2.04025e-05	0	0	0	0	0	0	0	0	0.0069617	0.0318062	0
ZOTU9597	1.21115e-05	0.00188212	0.0371584	0.0314781	0	0	0	0	0	0	0	0	0	0	0	0	0	1.85233e-05	0	0.0019312	0.00580277	0	0.000989705	0.000581381	6.71028e-05	4.97111e-05	0	0	0	0	0	0	0	0	0	0	0	0	0	0	0	0	0	0	0	0	0.00210825	0.0168365	0
ZOTU8319	0.00024223	0.000215981	0	0	0	0.000588036	0.000105472	1.42936e-05	0.000859968	0.00186494	9.62974e-05	0	0	0	0	1.43497e-05	0	0.000351943	0.000494209	6.89715e-05	0	0	0	0	0	0	0	0	0.000367885	0.00134888	0.000254537	0.00032135	0.00108995	0.00013553	6.18608e-05	3.58809e-05	0.000285675	0.00114254	0.000228013	0	0.000450972	0.0021976	0	0.000353899	0.000442014	0	0.00265549	0.0277236	0
ZOTU3667	0	0	0	0	0	2.94018e-05	0	0	0	7.01105e-06	2.40743e-05	0	0	0	0	0	0	0	0	0	0	0	0	0	0	0	0	0	0	0	9.98183e-06	0	0	4.37195e-06	0	0	0	0	0	0	0	0	0	0	0	2.26701e-05	8.97127e-06	0.0226775	9.68626e-06
ZOTU4017	0.00015745	7.71361e-06	0	0	0	2.94018e-05	0.00025782	0.000135789	0.00659309	0.0100118	0	0	0	0	1.544e-05	0	0	0	0.00012672	8.62143e-05	0	0	0	0	0	0	0	0	0.0302107	0.0175354	0.0139895	0.00701948	0.0128762	2.62317e-05	0.000103101	0.00362397	0.00221088	0.00572291	0.000143322	0	0.000411757	0.00440665	0.00150838	0.00255102	0.0115742	0.0090907	0	0	0
ZOTU4116	0.00139283	0.00831527	0	0	1.50152e-05	0.000984961	0.0123402	0.0149868	0.00702308	0.00398929	0.00142039	0	0	0	0	0	0	0.000407513	0.00451124	0.0198465	0.00646016	0	0	0	0	0	0	0	0.0015304	0.000674439	0.00134256	0.000682868	0.00107147	0.000786951	0.0015259	0.0107104	0.0188173	0.00652881	0.000117264	0.00340083	0.00113723	0.00154519	0.00244083	0.00670933	0.000245563	0	0	0	0
ZOTU1090	0	0.000308544	0.00729676	0.00670401	0	0	0	0	0	0	0.0512061	0.0113268	0.00270908	0	0	0	0	0	0	0.0020519	0.014932	0.0423379	0	0	0	0	0	0	0	0	0	0	0	0	0	1.79404e-05	0	0	0	0	0	0	0	0	0	0	0	0	0
ZOTU5551	0.000605576	0.000223695	0	0	0	0.00311659	0.000796897	5.00275e-05	0	0	0	0	0	0	0	0	6.3006e-05	0.000981736	0.000266112	0	0	0	2.4337e-05	8.07474e-06	0	2.48555e-05	0	0	0	1.92697e-05	2.49546e-05	0	0	0.0415554	0.00197954	0.0022605	0.000198731	9.18114e-05	0.0846254	0	0.000215682	0	0	0.000825764	0	0	0	1.20433e-05	0
ZOTU2823	0	0	0	0	0	1.47009e-05	0	0	0.000214992	0.000147232	0	0	0	0	0	0	0	0	0	0	0	0	0	0	0	0	0	0	0	3.85394e-05	9.48274e-05	9.03796e-05	7.38948e-05	0	0	5.38213e-05	4.96827e-05	0.000112214	0	0	0	3.43375e-05	0.000411376	0.00147458	1.63709e-05	0	0	0	0
ZOTU100	0.000278565	0.00083307	0	0	0	0	0	0	0	0	0.0114835	0	0	0	0	0	0	0.000351943	0.0267633	0.0308302	0.0181646	0.043826	0	0	0	0	0	0	0	0	0	0	0	0	0	0	0	0	0	0	0	0	0	0	0	0	0	0	0
ZOTU1360	0	0.000447389	0.00982997	0.0123238	0	0	0	0	0	0	0.000216669	0	0	0	0	0	0	0	0	0.000344857	8.40266e-05	0	0.00865587	0.042352	0.0352178	0.00770521	0.00831887	0.00595707	1.47154e-05	0	0	0	0	0	0	0	0	0	0	0	0	0	0	0	0	0	0	0.000168606	0
ZOTU4279	0	0	0	0	0	8.82055e-05	0	0	0	4.90773e-05	0	0	0	0	0	1.43497e-05	3.1503e-05	0	0	0	0	0	8.11234e-06	0	0	0	1.2306e-05	0	0.000147154	0	1.99637e-05	0	0	0	0	0	4.96827e-05	7.14089e-05	0	0	0	0.000217471	0	0	0	0	0.0347188	0.018101	0
ZOTU1473	3.63346e-05	0.000246835	0	0	0	0.000132308	0.00063283	0.00057889	0.00429984	0.0113369	0	0	0	0	0	0	0	0	0.000354817	0.00146564	8.40266e-05	1.86019e-05	0	0	0	0	0	1.09304e-05	0.0113309	0.0101551	0.015936	0.0041675	0.00360237	0.000166134	0.000288684	0.00163258	0.00226056	0.00293797	3.90879e-05	0	0.000764691	0.00203736	5.48501e-05	0.00010322	0.0469354	0.00238036	0	0	0
ZOTU7900	0	0	0.000220279	0.00343332	0.111939	0	0	0	0	0	0	0	0	0	0	0	0	0	0	0	0	0	3.24494e-05	0.000597531	0.000458536	0.000484683	9.84482e-05	0	0	0	0	0	0	0	0	0	0	0	0	0	0	0	0	0	0	0	0	0	0
ZOTU7871	0	0	0	5.42103e-05	0.105197	0	0	0	0	0	0	0	0	0	0	0	0	0	0	0	0	0.00189739	8.92357e-05	0.000686353	0.00459654	0.0067607	0.0063376	0.00376006	0	0	0	0	0	0	0	0	0	0	6.51466e-06	0	0	0	0	1.47458e-05	0	0	0	0	0
ZOTU9181	0	0	0	0	0	2.94018e-05	4.68763e-05	0	0	0.000238376	0	0	0	0	0	0	0	0	0	0	0	0	0	0	0	0	0	0	0	0.000192697	0.000234573	0.000301265	5.54211e-05	0	0	7.17618e-05	0	9.18114e-05	0	0	0	0.000114458	0	0	7.3669e-05	0	0	0	0
ZOTU135	0	0	0	0	0	0	0	0	0	0	0	0	0	0	0	0	0	0	0	0	0	0	8.11234e-06	8.88221e-05	0.00539059	0.0170882	0.0565831	0.0452628	0	0	0	0	0	0	0	0	0	0	0	5.20005e-06	0	0	0	0	0	0	0	0	0
ZOTU116	0	0	0	1.80701e-05	0.0132585	0	0	0	0	0	9.62974e-05	0	5.92796e-06	0	0	0	0	1.85233e-05	0	0	0	0	7.30111e-05	0.00749336	0.0265615	0.0340396	0.0248459	0.0158928	0	0	0	0	0	0	0	0	0	0	0	0	0	0	0	0	0	0	0	0	0
ZOTU8771	0.0362377	0.000524525	0	0	0	0	0	0	0	0	0	0	0	0	0	0	0	0.0445671	0.0379527	0	0	0	0.000356943	5.65232e-05	0	0	0	0	0	9.63484e-05	0	0	0	0	6.18608e-05	8.97022e-05	0	4.08051e-05	0	0	0	0	0	0	0	0	0	0	9.68626e-06
ZOTU108	0	0	0	0	0	0	0	0	0	0	0	0	0	0	0	0	0	0	0	0	0	0	0	0	0	0	0	0	0	0	0	0	0	0	0	0	0	0	0	0	0	0	0	0	0	0	0	6.02163e-05	0.0868277
ZOTU1026	0	0	0	0	0	0	0	0	0	0	0	0	0	0	0	0	3.1503e-05	0	0	0	0	0	8.11234e-06	0	0	1.24278e-05	0	0	0	0	0	0	0	0	0	0	0	3.06038e-05	0	0	0	0	0	0	0	0.00901136	0.0944136	0.000180649	0
ZOTU1355	0	0.000123418	0	0	0	0	0.00037501	0.00205113	0.00594812	0.0117155	0	0	0	0	0	0	0	0	5.06881e-05	0.00231054	0.0006129	0.000167417	1.62247e-05	0	0	0	0	0	0.0130231	0.00840158	0.0108952	0.0142699	0.0262511	0.000104927	8.2481e-05	0.00134553	0.00301822	0.00435594	4.56026e-05	0.000150801	5.88224e-05	0.00218616	0.00266023	0.00112068	0.00378168	1.1335e-05	0	0	0
ZOTU1016	0	0	0	0	0	1.47009e-05	0	0	0	4.90773e-05	0	0	0	0	0	0	0	0	0	0	0	0	0	0	0	0	0	0	4.41462e-05	9.63484e-05	0	0	0	0	0	0	0	4.08051e-05	0	0	0	9.15667e-05	0	0	8.18545e-06	0	0.000592103	0.0138497	0
ZOTU199	0	0	0	0	0	0	0	0	7.1664e-05	0.000147232	0	0	0	0	0	0	0	0	0	0	0	0	0	0	0	0	0	0	0	0	0	0	0	0	0	0	0	1.02013e-05	0	0	0	0	0	0	0	0	8.97127e-06	0.00390202	9.68626e-06
ZOTU139	0	0	0	0	0	0	0	0	0	0	0	0	0	0	0	0	0	0	0	0	0	0	0	0	0	0	0	0	0	0	0	0	0	0	0	0	0	0	0	0	0	0	0	0	0	0	0	0.00806898	9.68626e-06
ZOTU1425	0	0.00214438	0	0	0	0.000514532	0.00646893	0.00269434	0.00472983	0.0107409	0	1.24333e-05	0	0	0	0	0	3.70466e-05	0.00240768	0.00437969	0	0	0	0	0	0	0	0	0.000603332	0.000539551	0.000409255	0.000100422	0.000665053	9.61829e-05	0.00115473	0.0026193	0.00567624	0.00903833	0.00111401	0.00889728	0.0128821	0.0111482	0.0127801	0.00867052	0	0	0	0	0
ZOTU1212	0	0	0	0	0.000105107	0	0	0	0	0	0.00016852	1.24333e-05	0.000106703	1.67777e-05	0	1.43497e-05	0	1.85233e-05	0	0	0	0	8.11234e-05	0.00341561	0.00879047	0.0151122	0.0364135	0.0461044	0	0	0	0	0	0	0	0	0	0	0	0	0	0	2.74251e-05	0	0	0	0	0	0
ZOTU1460	0	0	0.00619536	0.0121973	0	0	0	0	0	0	0	0	0	0	0	0	0	1.85233e-05	0	5.17286e-05	0.000321278	0	0.0030908	0.039542	0.0289437	0.00344249	0.00889726	0.00682057	0	1.92697e-05	0	0	0	0	0	0	0	0	0	0	0	0	0	0	0	0	0	0.000457644	0
ZOTU216	0	0.00019284	0.0263647	0.0068305	0	0	0	0	0	4.20663e-05	0	0	0	0	1.544e-05	0	0	0	0	0.000672472	0	0	0	8.07474e-06	0	0	0	0	0	0	0	0	0	0	2.06203e-05	0	0	0	0	0	0	0	0	0	0	0	0	0.00192692	0
ZOTU587	0	0	0.00989881	0.0330322	0	0	0	0	0	0	0.00238336	0	0	0	0	0	0	0	0	0.000310372	0	0	0.000884245	0.00117891	0.000134206	2.48555e-05	0	0	0	0	0	0	0	0	0	0	0	0	0	0	0	0	0	0	0	0	0.000224282	0.00596141	0
ZOTU324	0	0	0.0051628	0.00103	0	0	0	0	0	0	0	0	0	0	0	0	0	0	0	0	0	0	0	0	0	0	0	0	0	0	0	0	0	0	0	0	0	0	0	0	0	0	0	0	0	0	0	0.00516656	9.68626e-06
ZOTU70	0	0.000377967	0	0	0	5.88036e-05	1.17191e-05	0	0.000143328	0.000511807	0	0	5.92796e-06	0	0	0	0	0	0.000164736	1.72429e-05	0	0	0	0	0	0	0	0	1.47154e-05	0.000134888	8.98365e-05	0.000110464	0	7.86951e-05	0	5.38213e-05	9.93653e-05	0.00039785	0.000201954	0	0.000392149	0.000709642	0	0	0.00107229	0.00207431	8.97127e-05	2.40865e-05	0
ZOTU4176	2.4223e-05	0.000439676	0	0	0	0.000396925	0.000363291	3.57339e-05	0.00300989	0.00837119	0	0	0	0	0	0	0	1.85233e-05	0.000164736	0.000448315	9.88548e-06	0	0	0	0	0	0	0	0.00573901	0.0177281	0.00830988	0.00471982	0.0178271	6.55792e-05	0	0.000753498	0.000869446	0.00472319	0.000110749	0	3.92149e-05	0.00763437	0	7.37289e-05	0.00863565	0.00601891	0.000125598	0	0
ZOTU1550	0.00142916	0.00913291	1.37675e-05	0	0	0.000264616	0.00842601	0.0125069	0.00372653	0.00318302	0	0	0	0	0	0	0	0	0.00134323	0.0179326	0.000998433	0.000613862	0.000267707	0	0	0	0	0	0.00479722	0.00202332	0.00196642	0.0010243	0.00496943	0.000236085	0.000907291	0.00574094	0.0163208	0.00279515	0	0	0	0.000354821	0	0.00197593	0.000572981	0	0	0	0
ZOTU419	0	0	0	0	0	0	5.85954e-05	7.14679e-06	0.00379819	0.00790846	0	0	0	0	0	0	0	0	0	0	0	0	0	0	0	0	0	0	0.0109924	0.0076886	0.0131511	0.0111267	0.0183259	8.3067e-05	6.18608e-05	0.00218873	0.000546509	0.00332561	0	0	0	0.000331929	0	0	0.0123027	0.0103489	0	0	0
ZOTU2013	0	0	6.88373e-05	0.00103	0.0296851	0	1.17191e-05	0	0	0	4.81487e-05	0.00759676	0.00800275	0.0209889	0	0	0	0	0	0	0	0	0.000300157	0.000274541	0.00189006	0.00746909	0.0153333	0.00831803	0	0	0	0	0	0	0	0	0	0	0	0	0	0	0	0	0	0	0	0	0
ZOTU118	0	0	0	0	0	0	0	0	0	0	0	0	0	0	0	0	0	0	0	0	0	0	0	0	0	0	0	0	0	0	0	0	0	0	0	0	0	0	0	0	0	0	0	0	0	0	0	0.0081292	0
ZOTU6492	0.00517162	0	0	0	0	0	0	0	0	0	0.0844046	0.00131793	0	0	0	0	0	0.00766865	0.000291457	0	0	0	3.24494e-05	0	0	0	0	0	0	0	0	0	0	0	0	7.17618e-05	1.24207e-05	0	0.000416938	0	0	0	0	0	0	0	0	0	0
ZOTU526	0	0	0	0	0	0	0	0	0	7.01105e-06	0	0	0	0	0	1.43497e-05	0	0	0	1.72429e-05	0	0	0	0	0	0	1.2306e-05	0	0	0	0	0	0	0	0	0	0	0	0	0	0	0	0	0	0	0	0.00608252	0.010297	0
ZOTU247	7.26691e-05	0.000509098	0	0	0	0.0366788	0.0055314	0.000586037	0	4.90773e-05	0.00166113	0	0	0	0	0	0	0.000185233	0.0033961	0.0004828	0	0	0	0	0	0	0	0	0	0	0	0	0	0.0174965	0.0184551	0.00518479	8.69446e-05	3.06038e-05	0.00441042	0	0.000725476	0	0	0.000973222	0	0	0	0	0
ZOTU5871	0	0.000231408	1.37675e-05	0	0	0	0	0	0	0	0.0125668	0	5.92796e-06	0	0	0	0	1.85233e-05	0	0	0	1.86019e-05	0.00129797	0.0309424	0.0249846	0.0123408	0.00187052	0.00320261	1.47154e-05	0	0	0	0	0	0	0	0	0	0	0	0	0	0.00204317	0	0	0	0	0	0
ZOTU4450	0	0	0	0	0	0	0	0	0	0	0	0	0	0	0	0	0	0	0	0	0	0	0	0	0	0	0	0	0.00054447	0.000231236	5.49001e-05	0.000271139	0.000406421	0	0	0	0	0	0	0	0	0	0	0	0	0	0	0	0
ZOTU4515	0	0	9.63723e-05	0.00162631	0.000195198	0	0	0	0	0	0	0	5.92796e-06	0	1.544e-05	0	0	0	0	0	0	0	0	3.2299e-05	0.000145389	0.000347977	8.61422e-05	0	0	0	0	0	0	0	0	0	0	0	0	0	0	0	0	0	0	0	0	0.000891201	0
ZOTU1440	0	0	0	0	0	0.00176411	0.00937526	0.00653216	0.00365487	0.00465534	0	0	0	0	0	0	0	7.40933e-05	5.06881e-05	0	0	0	0	0	0	0	0	0	0.00138325	0.0021004	0	0	7.38948e-05	0.000992432	0.00769136	0.0127377	0.0101228	0.00862007	0.000332248	0.00483604	0.00750966	0.00254098	0.000658201	0.00582458	8.18545e-06	1.1335e-05	0	0	0
ZOTU1374	0	0	0	0	0	0	0	0	0	0	0	0	0	0	0	0	0	0	0	0	0	0	7.30111e-05	0.00032299	0.006632	0.00641273	0.0224216	0.0519631	0	0	0	0	0	0	0	0	0	0	0	0	0	0	0	0	0	0	0	0	0
ZOTU990	0	0.000293117	0.0254285	0.0314059	0	0	0	0	0	0	0.0026241	0.0130674	0	0	0	0	0	0	0	0.00782826	0.00501194	0	4.8674e-05	0.000161495	0	0	0	0	0	0	0	0	0	0	2.06203e-05	0	0	0	0	0	0	0	0	0	0	0	0	0	0
ZOTU2795	0	0	0.000151442	0.00146368	0.000165168	0	0	0	0	0	0	0	0	0	0	0	0	0	0	0	0	0	0.00010546	0.00103357	0.000525639	0.00197601	0.000369181	0.000306051	0	0	0	0	0	0	0	0	0	0	0	0	0	0	0	0	0	0	0	0.000445601	0
ZOTU6506	0	0	0	0	0	0.00257266	0.00742989	0.00583178	0.00322488	0.0026642	0	0	0	0	0	0	0	0	2.5344e-05	0.000275886	0	0	0	0	0	0	0	0	0.0124934	0.00741883	0.00798547	0.00666801	0.00145942	0.00101429	0.00179396	0.00432365	0.0082349	0.00374387	0.000254072	2.60002e-05	0.00137252	0.00176266	0	0.000412882	0.000581167	0.000532747	0	0	9.68626e-06
ZOTU632	0.000750914	0.000601662	0	0	0	0.00195522	0.00817991	0.00609621	0.00150494	0.00199114	0.00016852	1.24333e-05	0	0	0	0	0	0.000537176	0.010201	0.00100009	0	0	0	0	0	0	0	0	0.000956501	0.00292899	0.000309437	0.00113477	5.54211e-05	0.000231713	0.00311366	0.00218873	0.00407398	0.00513124	0.000625407	0.00698886	0.0124311	0.00220905	0.00202945	0.0022856	0.000122782	0	0	0	0
ZOTU833	0.0384541	0.00162757	0	0	0	0.000367523	0.000726582	0.00057889	0	2.10331e-05	0.00334633	0	0	0	0	0	0	0.0166525	0.00926325	0.00103457	0	0	4.8674e-05	0	0	0	0	0	1.47154e-05	0	9.98183e-06	0	0	0.000109299	0.00105163	0.000753498	0.000335358	6.12076e-05	0.00028013	0.00360883	0.00111763	0.000148796	0.000191975	0	0	0	0	0	0
ZOTU239	0	0	0	0	0	0	0	0	0	0	0	0	0	0	0	0	0	0	0	0	0	0	0	0	0	0	0	0	0	0	0	0	0	0	0	0	0	0	0	0	0	0	0	0	0	0	8.07414e-05	0.0168485	0
ZOTU914	0.0180704	0.00310858	0	0	0	1.47009e-05	0.000269539	7.86147e-05	7.1664e-05	0	0.0308392	0.000609233	0	0	0	0	0	0.0165228	0.00553767	0.000655229	0	0	0.000851796	0.00015342	0	0	0	0	0	0	0	0	0	0	0.000103101	0.000143524	1.24207e-05	0	2.60586e-05	0	0	0	0	0	0	0	0	0	0
ZOTU290	6.05576e-05	0.0136531	1.37675e-05	0	0	0	0	0	0	0	0.00782416	0.001119	2.96398e-05	0	0.00906326	0.0406526	0	7.40933e-05	0	1.72429e-05	0	0	0.00369923	0.000573307	0	0	0	0	0	0	0	0	0	0	0	0	0	0	0	0	0	0	0	0	0	0	0	0	0
ZOTU6586	0.0189303	0.00121104	0	0	0	0.000793849	0	0	0	0	0.0120131	0.00221313	0	0	0	0	0	0.0385285	0.000988418	0	0	0	4.8674e-05	2.42242e-05	0	0	0	0	0	0	0	0	0	7.86951e-05	0.000329924	0.000269107	0	0	0.000286645	0	0	0	0	0	0	0	0	0	0
ZOTU2458	0	0	0	0	0	0	0	0	0	0	0	0	0	0	0	0	0	0	0	0	0	0	0	0	0	0	0	0	2.94308e-05	0	0.000369328	1.00422e-05	0.000775896	0	0	0	0	0	0	0	0	0	0	0	0	0	0	0	0
ZOTU167	0	0	0	0	0	0	0	0	0	0	0.000625933	0.0008206	0.00756408	0.0251833	0	0	0	0	0	0	0	1.86019e-05	0	0.00016957	0.000402617	0.00216243	0.00924183	0.026222	1.47154e-05	0	0	0	0	0	0	0	1.24207e-05	0	0	0	0	1.14458e-05	0	0	0	0	0	0	0
ZOTU4484	0	0	0	0	0	0	0	0	0	0	0	0	0	0	0	0	0	0	0	0	0	0	0	0	0	0	0	0	0	0	0	0	0	0	0	0	0	0	0	0	0	0	0	0	0	0	0.00201853	0.00721391	0
ZOTU1406	0	0	0.00016521	0.00213227	0.0436943	0	0	0	0	0	0	0	0	0	0	0	0	0	0	0	0	0	8.11234e-06	0.000799399	0.00426103	0.00546822	0.0065345	0.00886455	0	0	0	0	0	0	0	0	0	0	0	0	0	0	0	0	0	0	0	0	0
ZOTU7791	0	0.000200554	0.00294624	0.00697506	0	0	0	0	0	0	0.00363523	0	0	0	0	0	0	0	5.06881e-05	0.00101733	0.00412719	0	0.00163869	0.00942322	0.000458536	0.000459827	0.000159978	0.000109304	0	0	0	0	0	0	0	0	0	0	0	0	0	0	0.000630776	0	0	0	0	0	0
ZOTU853	0	0	0	0	0	0	0	0	0	0.000105166	0	0	0	0	0	0	3.1503e-05	0	0	0	0	0	0	0	0	0	0	0	0	3.85394e-05	0	0	0	0	0	3.58809e-05	0	2.04025e-05	6.51466e-06	0	0	0	0	1.47458e-05	0	9.06803e-05	0.0209658	0	0
ZOTU1020	0.00307633	0.00269205	0	0	0	0.000676242	0.00132425	0.00235129	0.00286656	0.00113579	0.000577784	0	0	0	0	0	0	0.00257474	0.00495476	0.00146564	0	0	0	0	0	0	0	0	5.88616e-05	3.85394e-05	0	0	0	0.00111922	0.00387661	0.00285253	0.00154016	0.00372346	0.00111401	0.0252358	0.00317641	0.00327351	0	0.000265424	0	0	0	0	0
ZOTU848	6.05576e-05	0.000123418	0	0	0	1.47009e-05	0.000410167	0.00140792	0.00386986	0.00666751	0.000698156	0	0	0	0	1.43497e-05	0	0	8.87042e-05	0.0033796	9.88548e-05	5.58056e-05	0.00274197	6.45979e-05	0	0	0	0	0.00632762	0.00516427	0.0117137	0.00432818	0.00506179	4.37195e-06	8.2481e-05	0.00165052	0.00322937	0.00313179	3.25733e-05	5.20005e-06	1.96075e-05	0.00173977	0.000877602	0.00129763	0.00380623	4.53402e-05	8.07414e-05	0	0
ZOTU1170	0	7.71361e-06	0.000192745	0.000650524	0	0	0	0	0	0	0	0	0	0	0	0	0	0	0	0	6.42556e-05	0	0.00507832	0.0091729	0.000548006	0.000198844	8.61422e-05	0	1.47154e-05	0	0	0	0	0	0	0	0	0	0	0	0	0	0	0	0	0	0	0	0
ZOTU3031	0.000193784	0.000107991	0	0	0	0.00430737	0.000421887	1.42936e-05	0	4.90773e-05	0.00016852	0	0	0	0	1.43497e-05	0	0.000463083	0.000849026	3.44857e-05	0	0.000744075	0	0	0	0	0	0	0	1.92697e-05	0	0	0	0.0257989	0.00228885	0.00118407	1.24207e-05	3.06038e-05	0.0300326	5.20005e-06	1.96075e-05	6.8675e-05	0	2.94916e-05	0	0	0	0	0
ZOTU370	0	3.8568e-05	0.000757211	0.00348753	0	0	0	0	0	0	0	0	0	0	0	0	0	0	0	0	0	0	7.30111e-05	4.03737e-05	0	0	0	0	0	0	0	0	0	0	0	0	0	0	0	0	0	0	0	0	0	0	0	0.00155358	0
ZOTU1822	0	0	0	0	0	0.000735045	0.000328134	0.000371633	0.000286656	0	0	0	0	0	0	0	0	0	1.2672e-05	0	0	0	0	0	0	0	1.2306e-05	0	0.00126552	0.00410444	4.99092e-06	0	0	0.000244829	0.000144342	0.000161464	0.00235993	0.000632479	0.000260586	0.0469408	0.000549009	0.000469279	0.00201574	0.00207916	0.000163709	0	0	0	0
ZOTU1265	0	0	0.0137537	0.00708348	0	0	0	0	0	0	0	0.000571933	0	0	0	0	0	0	0	0.000655229	0	0	0	0	0	0	0	0	0	0	0	0	0	0	0	0	0	0	0	0	0	0	0	0	0	0	0.000933012	0.00262543	0
ZOTU1401	0	0	0	0	0	0.000558635	0.0052853	0.00442386	0.00214992	0.00250294	0	0	0	0	0	0	0	0	6.33601e-05	0	0	0	0	0	0	0	0	0	0.000176585	0.000231236	0.000124773	0	5.54211e-05	0.00114982	0.00775322	0.00877287	0.00860752	0.00708988	1.30293e-05	0.00641166	0.00305876	0.00141928	0.00190604	0.000368645	0.00116233	0	0	0	0
ZOTU166	0	0	0	0	0	0	0	0	0	0	0	0	0	0	0	0	0	0	0	1.72429e-05	0	0	8.11234e-06	8.07474e-06	3.35514e-05	0.00164046	0.0151118	0.046957	0	0	0	0	0	0	0	0	0	0	0	0	0	0	0	0	0	0	0	2.40865e-05	0
ZOTU8488	0.0010537	0.0488503	0	0	0	0.000102906	7.03144e-05	0	0.000286656	0.000434685	0	0	0	0	0	0	0	0	2.5344e-05	0.0009656	0	0	0.000438066	0.000104972	0	0	0	0	0	0.000250506	4.49182e-05	0	0	0.000236085	4.12405e-05	0.000251166	0.000459565	0.000979322	0.000390879	0	0.0013137	0.00438376	0	0.00281644	0	0	0	0	0
ZOTU8785	0	0	0	0	0	0	0	0	0	0	0	0	0	0	0	0	0	0	0	0	0	0.0599725	0	0	0	0	0	0	0	0	0	0	0	0	0	0	0	0	0	0	0	0	0	0	0	0	0	0.000541947	0
ZOTU961	0	0.000331685	0.0143732	0.0139501	3.00305e-05	0	0	0	0	0	0.000770379	0	0	0	0	0	0	0	2.5344e-05	0.0008449	0.0155251	0	0.0013142	0.00111431	0.000335514	7.45666e-05	0	0	0	0	0	0	0	0	2.06203e-05	0	0	0	0	0	0	0	0	0	0	0	0	0.00251704	0
ZOTU4422	0	0	0	0	0	0	2.34381e-05	0	0	0.000371586	0	0	0	0	0	0	0	0	0	0.000258643	0	0	0	0	0	0	0	0	5.88616e-05	0	9.98183e-06	0	0	0	0	0	0.000111786	0.000132617	0	0	0	0.000240363	0	0	0	0	0.000376793	0.00986343	0
ZOTU1135	0	0	0	0	0	0	0	0	0	0	0	0	0	0	0	0	0	0	0	0	0	0	0	0	0	0	0	0	0	0	0	0	0	0	0	0	0	0	0	0	0	1.14458e-05	0	0	0	0	0	0	0
ZOTU2498	0.000351234	0	0	0	0	0	0	0	0	0	0.0591747	0.00207637	0	0	0	0	0	0	0	0	0	0	0	0	0	0	0	0	0	0	0	0	0	0	0	0	0	0	0	0	0	0	0	0	0	0	0	0	0
ZOTU1069	0	0	0	0	0	0	0	0	0.000143328	0.000357564	0	0	0	0	0	0	0	0	0	1.72429e-05	0	0	0	0	0	0	0	0	4.41462e-05	0	0.00145236	0.000482025	0.0099019	0	0	0	1.24207e-05	3.06038e-05	1.30293e-05	0	0	0.000194579	0	0	0.00818545	0.000464737	4.48563e-05	0	0
ZOTU338	0	0	0	0	0	0	0	0	0	0	0	0	0	0	0	0	0	0	0	0	0	0	0	0	0	0	0	0	0	0	0	0	0	0	0	0	0	0	0	0	0	0	0	0	0	0	0	0.0121998	0
ZOTU1186	0	0.00239122	0	1.80701e-05	0	0	0.000820335	0.00130786	0.00709474	0.0058402	0.00130001	0	0	0	0	0	0	0	0.000316801	0.00117251	0	0	8.11234e-06	0	0	0	0	0	5.88616e-05	0	0	0	0	0	0.000103101	0.00145318	0.0040864	0.0100789	0.000130293	0	0.00607831	0.0100952	0.00643118	0.000899493	0	0	0	0	0
ZOTU9018	8.47807e-05	3.08544e-05	0	0	0	0.000191112	0.00025782	9.29082e-05	0.00386986	0.00570699	0	0	0	0	0	0	0	0	0.00012672	0.000913872	0	0	0	0	0	0	0	0	0.0058273	0.00105983	9.48274e-05	0	5.54211e-05	0.00017925	0.000329924	0.00229638	0.0022233	0.00580452	0.000312704	8.84008e-05	0.0049999	0.0160127	0.000534789	0.00670933	0.00175169	0	0	0	0
ZOTU268	0	0	0	0.000198771	0	0	0	0	0	0	0	0	0	0	0	0	0	0	0	0	0	0	0	8.07474e-06	0	0	0	0	0	0	0	0	0	0	0	0	0	0	0	0	0	0	0	0	0	0	0	0	0
ZOTU4532	0	0	0	0	0	1.47009e-05	0.00186333	0.00163661	0.00394152	0.00338634	0	0	0	0	0	1.43497e-05	0	0	2.5344e-05	0.000155186	0	0	0	0	0	0	0	0	0.00211902	0.0023509	3.49364e-05	0	0	0.000209853	0.000556747	0.00213491	0.00520426	0.00763055	0.000104235	0.00684846	0.00633321	0.00246086	0.00224886	0.00529374	0.00178443	0.000578087	0	0	0
ZOTU1414	0.000339123	0.00120332	0	0	0	0.00108787	0.00530874	0.00200825	0.0027949	0.000995569	0	0	0	0	1.544e-05	0	0	0.00022228	0.00586715	0.00137943	0	0	0	0	0	0	0	0	0.00360527	0.00198478	0.000788565	0.00144607	0.000369474	0.000572725	0.00202079	0.00236814	0.00478196	0.00254012	0.000299674	0	0.00505872	0.00551689	0.00324987	0.00100271	1.63709e-05	0	8.97127e-06	0	0
ZOTU1435	0	0.0011879	0.0380808	0.0102096	0	0	0	0	0	0	0	0	0	0	0	0	0	0	0	0	0.00196721	0	8.11234e-06	0	0	0	0	0	0	0	0	0	0	0	0	0	0	0	0	0	0	0	0	0	0	0	0	0	0
ZOTU557	0	0	0	0	0	0	0	0	0	0	0	0	0	0	0	0	0	0	0	0	0	0	0	0	0	0	0	0	0	0	0	0	0	0	0	0	0	0	0	0	0	0	0	0	0	0	0.00156997	0.00309512	0
ZOTU6384	0	0	0	1.80701e-05	0.0540399	0	0	0	0	0	0	0	0	0	0	0	0	0	0	0	0	0	0	0	0	0	0	0	0	0	0	0	0	0	0	0	0	0	0	0	0	0	0	0	0	0	0	0	0
ZOTU668	0	0	0	0	0	0	0	0	0	0	0	0	0	0	0	0	0	0	0	0	0	0	0	0	0	0	0	0	0	0	0	0	0	0	2.06203e-05	0	0	0	0	0	0	0	0	0	0	0	0	0	0
ZOTU862	0	0	0.0075308	0.00166245	0	0	0	0	0	0	0	0	0	0	0	0	0	0	0	0	0	0	0	0	0	0	0	0	0	0	0	0	0	0	0	0	0	0	0	0	0	0	0	0	0	0	0	0.00940579	0
ZOTU8289	2.4223e-05	0.00114161	0	0	0	0.000235215	0.00117191	0.00217262	0.0027949	0.00420663	0.000192595	0	0	0	0	0	0.0010396	0.00027785	0.00107712	0.00381067	0	0	0	0	0	0	0	0	0.000971217	0.00057809	0.000833483	0.000381603	0.000628106	0	0.000226823	0.00143524	0.0029437	0.00339702	0.000110749	0.00138841	0.00245093	0.00431508	0.00453885	0.00522001	0.000597538	0.00108816	0	0	0
ZOTU748	0	0	0	0	0	0	0	0	0	0	0	0	0	0	0	0	0	0	0	0	0	0	0	0	0	0	0	0	0	0	0	0	0	0	0	0	0	0	0	0	0	0	0	0	0	0	0.000933012	0.01503	9.68626e-06
ZOTU1368	0.000218007	0.000586234	0	0	0	7.35045e-05	5.85954e-05	0	0.000931633	0.00174575	0	0	0	0	0	0	0	0	0.000215424	0.000534529	0	0	0	0	0	0	0	0	0.000470893	0.000693708	0.000938292	0	0.00014779	7.43231e-05	2.06203e-05	0.000125583	0.000235993	0.000867108	0.000247557	0	0	0.00116748	0	0	0.0257023	0.000226701	1.79425e-05	0.000120433	0
ZOTU1030	0	0	0	0	0	5.88036e-05	0	0	0.00071664	0.00226457	0.000288892	0	0	0	0	0	0	0	0	5.17286e-05	0	0	0	0	0	0	0	0	0.00906469	0.0145101	0.00218602	0.00264109	0.0139661	2.62317e-05	2.06203e-05	1.79404e-05	2.48413e-05	0.000489661	5.86319e-05	0	0	0.000755425	0	0.000530848	0.00155524	0.00013602	0	0	0
ZOTU1192	0.000133227	0.000439676	0	0	0	0.000338121	0.00471107	0.0034376	0.00300989	0.00126199	0	0	0	0	0	0	0	0.00066684	0.00655144	0.00620743	0.00123074	0	0	0	0	0	0	0	0.000206016	0.000346854	0.000119782	0.000190801	1.84737e-05	0.000271061	0.000597987	0.00116613	0.00647117	0.00443755	0.000143322	0.000821607	0.00186271	0.00334218	0.000178263	0.000766781	0	0	0	0	0
ZOTU7718	0	0	0.0220279	0.0262017	0	0	0	0	0	0	0	0	0	0	0	0	0	0	0	0.000275886	0	0	0	0	0	0	0	0	0	0	0	0	0	0	0	0	0	0	0	0	0	0	0	0	0	0	0	0	0
ZOTU7707	0	0.000246835	0	0	0	0.000235215	0.000363291	2.85872e-05	0.00315322	0.00277638	0	0	0	0	0	0	0	0	0.000164736	0.00296577	0	0	0	0	0	0	0	0	0.000176585	0.0025436	0.000848456	0.00023097	0.000295579	0	8.2481e-05	0.00134553	0.0025835	0.00339702	3.90879e-05	0	0.00515676	0.0146163	0	0.00513153	8.18545e-05	0	0	0	0
ZOTU257	0.000218007	0.0381515	4.13024e-05	0	0	0	0	0	0	0	0	0	0	0	0	0	0	0	0	0	0	0	0.00727677	0.000218018	2.23676e-05	0	0	0	0	0	0	0	1.84737e-05	0	0	0	0	0	0	0	0	0	0	0	0	0	0	0	0
ZOTU5962	6.05576e-05	0.000393394	0	0	0	0	0.000656268	0.00333755	0.00415651	0.00260811	0	0	0	0	0	0	0	0	0.00012672	0.0044659	0.0101623	0.000706872	8.11234e-06	8.07474e-06	0	0	0	0	0.000176585	0.00111764	0.00345871	0.00457923	0.00153332	6.55792e-05	0.000144342	0.00118407	0.00278223	0.00105073	2.60586e-05	4.16004e-05	7.84298e-05	0.00100723	0.000713052	0.000442373	0.000139153	0	0	0	0
ZOTU545	0	0	0	0	0	0	0	0	0	0	0	0	0	0	0	0	0	0	0	0	0	0	0	0	0	0	0	0	0	0	0	0	0	0	0	0	0	0	0	0	0	0	0	0	0	0	0	0.000566033	0
ZOTU877	8.47807e-05	0	0.0224272	0.0154319	0	0	0	0	0	0	0	0	0	0	0	0	0	0	0	0.00634537	0	0	0	0	0	0	0	0	0	0	0	0	0	0	0	0	0	0	0	0	0	0	0	0	0	0	0	0	0
ZOTU959	0	0	0	0	0	0	0	0	0.00394152	0.00436087	0	0	0	0	0	1.43497e-05	0	0	0	0	0	0	0	0	0	0	0	0	0.00309023	0.0104827	0.00438702	0.0037859	0.0025309	0.000118043	6.18608e-05	0.00157876	0.00057135	0.00601875	0	0	0	0.000320483	0	0	0.00036016	5.66752e-05	0	0	0
ZOTU248	0	0	0	0	0	0	0	0	0	0	0	0	0	0	0	0	0	0	0	0	0	0	0	0	0	0	0	0	0	0	0	0	0	0	0	0	0	0	0	0	0	0	0	0	0	0	0	0	0
ZOTU4570	0.000230119	0.00267662	0	0	0	0.000191112	0.0015352	0.00263716	0.00193493	0.00140221	0	0	0	0	0	0	0	0.000370466	0.00119117	0.00453487	0.00135925	0.0030135	0.000194696	0	0	0	0	0	0.000765201	0.000751517	0.00201633	9.03796e-05	0.00064658	0.000166134	0.00076295	0.00272695	0.00689347	0.00277475	6.51466e-06	0	0.000627439	0.00107591	0.00130269	0.000353899	1.63709e-05	4.53402e-05	0	0	0
ZOTU6358	0	4.62817e-05	0.0173332	0.0189375	0	0	0	0	0	0	2.40743e-05	0	0	0	0	0	0	0	0	0.0001207	0.000864979	3.72038e-05	0.00339907	0.00141308	0	0	0	0	0	0	0	0	0	0	0	0	0	0	0	0	0	0	0	1.47458e-05	0	0	0	0	0
ZOTU1347	0.0116634	0.00139616	0	0	0	0	0.000597673	0.00201539	0.00322488	0.00222951	2.40743e-05	0	0	0	0	0	0	0.00016671	0.00106445	0.002414	0	0	0.000235258	8.07474e-05	0	0	0	0	0.000985932	0.000867136	0.00108802	0.000542278	0.000258632	0.000367244	0.000268063	0.00148906	0.00295612	0.00379487	0.000143322	0	0.000254897	0.00195724	0.000342813	0.00169577	1.63709e-05	0	0	0	0
ZOTU1256	0.00766659	0.00167385	0	0	0	0.000867354	0.00274226	0.00149368	0.000214992	9.11436e-05	0.00587414	0.000310833	0	0	0	0	0	0.00618679	0.00726107	0.000344857	0	0	0	0	1.11838e-05	0	0	0	2.94308e-05	0	0	8.03374e-05	0	0.000284177	0.00167024	0.000609975	0.000136627	3.06038e-05	0.000175896	0.00343203	0.000196075	5.72292e-05	0	0.000191695	0	0	0	0	0
ZOTU2059	0	0.00131131	0.0191505	0.00737261	0	0	0	0	0	0	0	0	0	0	1.544e-05	0	0	0	0	0.000465557	0	0	0.000356943	8.07474e-05	0	3.72833e-05	0	1.09304e-05	0	0	0	0	0	0	0	0	0	0	0	0	0	0	0	0	0	0	0.0022159	0.00411879	0
ZOTU1190	0	0	0	0	0	0	0	0	0	0	0.000650007	0	0	0	0	0	0	0	0	0	0	0	0.0020362	0.0120717	0.000849969	0.000161561	6.15301e-05	0	0	0	0	0	0	0	0	0	0	0	0	0	0	0	0	0	0	1.1335e-05	0	0	0
ZOTU7947	6.05576e-05	0.0304842	2.75349e-05	0	0	0	0	0	0	0.00121992	0	0	0	0	0	0	0	0	3.80161e-05	0	0	0	0.000113573	2.42242e-05	0	0	0	0	0.000397316	0.00308315	0.000249546	0.0012854	0.000184737	0	0	0.00156082	0	0.000224428	0	0	0	0.000286146	0	0	0.000376531	0	0	0	0
ZOTU989	0	0	0.000357954	0.00117456	0.0251055	0	0	0	0	0	0	0	0	0	0	0	0	0	0	0	0	0	6.48987e-05	0.00127581	0.00303081	0.00234885	0.00323648	0.00436123	0	0	0	0	0	0	0	0	0	0	0	0	0	0	0	0	0	0	0	0	0
ZOTU4443	0	6.17089e-05	0.017526	0.0158113	0	0	0	0	0	0	0	0	0	0	0	0	0	0	0	5.17286e-05	0	0	0.00586522	0.00122736	0	0	0	0	0	0	0	0	0	0	0	0	0	0	0	0	0	0	0	0	0	0	0	3.61298e-05	0
ZOTU4339	0	0	0	0	0	0.000882055	0.00384386	0.00204398	0.00114662	0.00288855	0	0	0	0	0	0	0	0	1.2672e-05	0	0	0	0	0	0	0	0	0	0.00615104	0.00718759	0.00325907	0.000763205	0.000591158	7.43231e-05	0.000927912	0.00184787	0.00247171	0.00200965	9.12052e-05	0	0.00172546	0.000732534	0	0.000309661	0.000229193	0.00011335	0	0	0
ZOTU912	4.84461e-05	0	0	0	0	0.00995252	0.00465247	0.0024585	0.000501648	2.80442e-05	0	0	0	0	1.544e-05	0	3.1503e-05	0.00242656	6.33601e-05	0	0	0	0	0	0	0	0	0	0	3.85394e-05	0	5.02109e-05	9.23685e-05	0.000738859	0.00635104	0.00367779	0.00139111	0.000428453	0.00211075	0.00121681	0.00243132	0.000343375	0.000905027	0.000412882	0	0	0	0	0
ZOTU224	0	0	1.37675e-05	0	0.0344149	0	0	0	0	0	0	0	0	0	0	0	0	0	0	1.72429e-05	0	0	4.05617e-05	1.61495e-05	0	4.97111e-05	0.00105832	0.00461263	0	0	0	0	0	0	0	0	0	0	0	0	0	1.14458e-05	0	5.89831e-05	0	0	0	0	0
ZOTU201	0	0	0	0	0	0	0	0	0	0	0	0	0	0	0	0	0	0	0	0	0	0	0	0	0	0	0	0	0	0	0	0	0	0	0	0	0	0	0	0	0	0	0	0	0	0	0	0.0151022	0
ZOTU333	0	0.000200554	0	0	0	0	0.0014766	0.000614624	0.00257991	0.00173173	0	0	0	0	0	0	0	0	0.000215424	0.00179326	0	0	0	0	0	0	0	0	0.000279593	0.00148377	0.000159709	0.000241012	0.00049879	8.3067e-05	2.06203e-05	0.000609975	0.00183826	0.00211166	0	0.00746207	0.00296073	0.00543677	0.00223514	0.00498407	0	0	0	0	0
ZOTU511	0	0	0	3.61402e-05	0	0	0	0	0	0	0	0	0	0	0	0	0	0	0	0	0	0	0	0	0	0	0	0	0	0	0	0	0	0	0	0	0	0	0	0	0	0	0	0	0	0	0.000260167	0.00340824	0
ZOTU291	1.21115e-05	0	0	0	0	0	0	0	0	0	0	0	0	0	0	0	0	0	0	0	0	0	0	0	0	0	0	0	0	0	4.99092e-06	0	0	0	0	0	0	0	0	0	0	0	0	0	2.45563e-05	0.0386525	0	0	0
ZOTU909	1.21115e-05	0	0	0	0	0	0	0	0	0	0.000288892	0	0	0	0	0	0	0	0	0	0	0	2.4337e-05	0.0022367	0.00209137	0.0139315	0.00783894	0.0122311	0	0	0	0	0	0	0	0	0	0	0	0	0	0	0	0	0	0	0	0	0
ZOTU652	0	0	0	0	1.50152e-05	0	0	0	0	0	0	0	0	0	0	0	0	0	0	0	0	0	0	0	0.000424985	0.00288324	0.012909	0.0218389	0	0	0	0	0	0	0	0	0	0	0	5.20005e-06	0	0	0	0	0	0	0	0	0
ZOTU4315	0	0	0	0	0	0	0	0	7.1664e-05	7.01105e-05	0	0	0	0	0	0	0	0	0	0	0	0	0	0	0	0	0	0	0	9.63484e-05	0.00032441	8.03374e-05	7.38948e-05	0	0	1.79404e-05	0	0	0	0	1.96075e-05	5.72292e-05	0	8.84747e-05	9.00399e-05	6.80102e-05	0	0	0
ZOTU4565	0.000351234	0.000725079	0	0	0	0	0.000304696	0.0022298	0.00394152	0.00429076	0	0	5.92796e-06	0	0	0	0	0	7.60321e-05	0.00624192	0.000988548	0	0.00274197	0.000290691	0	0	0	0	0.000338454	9.63484e-05	0.00358348	0.00268126	0.00221684	4.37195e-05	4.12405e-05	0.000861141	0.00219846	0.00154039	0	0	1.96075e-05	0.000835546	0	0.000147458	0.000744876	0	0	0	0
ZOTU3896	0.00255553	0	0	0	0	0.000294018	0.000292977	0.000157229	0	2.10331e-05	0.00240743	0.000472466	0	0	0	0.0203048	0	0.00620531	0.00300327	6.89715e-05	0	0	3.24494e-05	0	0	0	0	0	0	0	0	0	0	4.37195e-06	0.000185582	0.00041263	4.96827e-05	0	0.000130293	0	0.000607831	0	0	0	0	0	8.97127e-06	0	0
ZOTU9087	1.21115e-05	0.000246835	0	0	0	8.82055e-05	0.000562515	0.00340902	0.00480149	0.00276936	0	0	0	0	0	0	0	0	0.000152064	0.0018105	0.000182881	0	0	0	0	0	0	0	0.000706339	9.63484e-05	0.00645825	0.00544286	0.002106	8.3067e-05	0.000103101	0.000574094	0.000807343	0.000754894	6.51466e-05	0.000717606	0.000431364	0.00241507	0.000315388	0.00165153	0.000286491	0	0	0	0
ZOTU4881	0.0354504	0.00038568	0	5.42103e-05	0	0	0	0	0	0	0	0	0	0	0	0	0	0.000777979	0.000177408	0	0	0	4.8674e-05	0	0	0	0	0	0	0	0	0	0	0	0	0	0	0	0	0	0	0	0	0	0	0	0	0	0
ZOTU7924	0	0	0	0	0	0	0	0	0	7.01105e-06	0	0	0	0	0	0	0	0	0	0	0	0	0	0	0	0	0	0	0	0	0	0	0	0	0	1.79404e-05	0	0	0	0	0	0	0	0	0	0	0.0010317	0.00733434	0
ZOTU834	0.000351234	0.00285404	0	0	0	0	0.00108987	0.0042309	0.00214992	0.00213837	0	0	0	0	0	0	0	0	0.000633601	0.00596603	0	0	0	0	0	0	0	0	0.000441462	0.000770787	0.000134755	0.000100422	7.38948e-05	0.000375988	0.000268063	0.00174022	0.00632212	0.00252992	0	0	0.000294112	0.000583738	0.00128898	0.00237407	0	0	0	0	0
ZOTU9352	0.000133227	0.000485957	0	0	0	0.00189642	0.00134769	0.00145794	0.00128995	0.00066605	4.81487e-05	1.24333e-05	0	0	0	0	0	0.00146334	0.000684289	0.000310372	7.90838e-05	0	0	0	0	0	0	0	0.00128024	0.000828596	0.0034088	0.00252059	0.000628106	0.000284177	0.00164962	0.00123789	0.000993653	0.00064268	5.86319e-05	0.00754527	0.00205878	0.00144218	0.000493651	0.000545594	0.000777618	7.93453e-05	0	0	4.84313e-05
ZOTU8181	0	0	0	0	0	0	0	0	0.000143328	0.000546862	0	0	0	0	0	0	0	0	0	0	0	0	0	0	0	0	0	0	0	0	0.0003294	5.02109e-05	0	8.7439e-06	0	0	1.24207e-05	2.04025e-05	6.51466e-06	0	1.96075e-05	0.000503617	0	0	0.00379805	0.000226701	3.58851e-05	0.000349255	0
ZOTU482	7.26691e-05	0.000347112	0	0	0	0	0	0	0	0	0.0337041	0.00129307	0.00026083	0	0	0	0	0	0	0	0	0	0	0	0	0	0	0	0	0	0	0	0	0	0	0	0	0	0	0	0	0	0	0	0	0	0	0	0
ZOTU358	0	0	0.00289117	0.0176184	0.00198201	0	0	0	0	0	0.00134816	0	0	0	0	0	0	0	0	0	0	0	0.000795009	0.00821201	0.00126377	0.000621388	0.000504547	0.000437216	0	0	0	0	0	0	0	0	0	0	0	0	0	0	0	0	0	0	0	0	0
ZOTU1454	0	7.71361e-06	0	0	0	0.00233744	0.00510951	0.00494558	0.00071664	0.000329519	0	0	0	0	0	0	0	0	0	0	0	0	0	0	0	0	0	0	0.00100065	0.000366124	0.000344373	0.000542278	0	0.000131158	0.000948532	0.00550771	0.00327906	0.000826303	2.60586e-05	0.00630246	0.00152938	0.000400604	0.000836464	2.94916e-05	8.18545e-06	0	0	0	0
ZOTU5217	0	0	0	0	0	0	0	0	0	0	0	0	5.92796e-06	0	0	1.43497e-05	0	0	0	0	0	0	0	0	0	0	0	0	0	0	0	0	0	0	0	0	0	0	0	0	0	0	0	0	0	0	6.27989e-05	0.00491365	0
ZOTU6306	0.00259187	0.000617089	0	0	0	0.000558635	9.37526e-05	2.14404e-05	0	0	0	0	0	0	0	0	0	0.00753899	0.0234559	0	0	0	0	0	0	0	0	0	0	0	0	0	0	0	6.18608e-05	0.000107643	0	0	7.81759e-05	0	0	0	0	0	0	0	0	0	0
ZOTU628	0	0	0	0	0	0	0	0	0	7.01105e-06	0	0	0	0	0	0	0	0	0	0	0	0	0	0	0	0	0	0	1.47154e-05	0	0	0	0	0	0	0	0	0	0	0	0	0	0	0	0	0.00825191	0.00809208	0.000782812	0
ZOTU8012	0	0.000285404	0	0	0	0	0	0	0	6.30994e-05	0	0	0	0	0	0	0	0	0	5.17286e-05	0	0	0	0	0	0	0	0	0	0	0	0	0	0	0	0	1.24207e-05	3.06038e-05	0	0	5.88224e-05	2.28917e-05	0	0	0	0	0	0	0
ZOTU258	0	0	0	0	0	0	0	0	0	0	0	0	0	0	0	0	0	0	0	0	0	0	0	0	0	0	0	0	0	0	0	0	0	0	0	0	0	0	0	0	0	0	0	0	0	0	8.97127e-05	0.000794855	0
ZOTU1011	9.68922e-05	0.000185127	0	0	0	0.000661541	0.00414855	0.00161517	0.00121829	0.00154243	0	0	0	0	0	0	0	0.00044456	0.00140659	0.000344857	0	0	0	0	0	0	0	0	0.00142739	0.000462472	0.00161706	0.000602531	0.00190279	0.000244829	0.000701089	0.00147112	0.00286917	0.00125476	9.77199e-05	0	0.00454893	0.00297592	0.000356526	0.00135661	9.00399e-05	0	0	0	0
ZOTU1463	0	0.000524525	0	0	0	0.000749746	0.00297664	0.00115778	0.00229325	0.00110775	0	0	0	0	0	0	0	0.000240803	0.00669083	0.00286232	0	0	0	0	0	0	0	0	0.000309023	0.000539551	0.000124773	0.000241012	0	0.000288549	0.00119597	0.00191963	0.00259592	0.00171381	0.000234528	0	0.00278426	0.00271266	0	0.000368645	0	0	0	0	0
ZOTU5935	0	0	0	0	0	0.00032342	0.00130082	0.00298021	0.000501648	0.000595939	0	0	0	0	0	0	0	0	0.000139392	0	0	0	0	0	0	0	0	0	0.00420861	0.00163792	0.000359346	0.00322354	0.000110842	0.000507146	0.00158776	0.00249372	0.00101849	0.000632479	0	0	0.000725476	8.01209e-05	0	0	0.00874206	0	0	0	0
ZOTU356	0	0.00290803	0.0233083	0.00430069	0	0	0	0	0	0	0	0	0	0	0	0	0	0	1.2672e-05	0.000500043	0	0	1.62247e-05	0	0	0	0	0	0	0	0	0	0	0	0	0	0	0	0	0	0	0	0	0	0	0	0	0.000638293	0
ZOTU1759	0	0	0	0	0	0	0	0	0	0	0	0	0	0	0	0	0	0	0	0	0	0	0	0	0	0	1.2306e-05	0	0	0	0	0	0	0	0	0	0	0	0	0	0	0	0	0	0	0	6.27989e-05	0.00202327	0
ZOTU858	0.00024223	0.00877809	0	0	0	0	0.000199224	7.14679e-06	0.000286656	0.000708116	0.000842602	0	0	0	0	0	0	0.000129663	0.00174874	0.0008449	0	0	6.48987e-05	2.42242e-05	0	0	0	0	0.000500324	0.000558821	3.49364e-05	0	0.000110842	0.000275433	0.00600049	0.0033728	0.000422303	0.00110174	9.12052e-05	0	7.84298e-05	0.000354821	0.00416861	0.000516102	0	0	0	0	0
ZOTU237	0	0	0	0	0	0	0	0	0.000214992	0.000511807	0	0	0	0	0	0	0	0	0	0	0	0	0	0	0	0	0	0	0.00103008	0.000462472	0.000134755	0	0.000240158	0	0	0.000430571	0	0.000224428	0	0	0	2.28917e-05	0	0	0.0274949	0	0	0	0
ZOTU379	0.0246954	0.000246835	0	0	0	0	0	0	0	0	0	0	0	0	0	0	0	0.00405661	0.00168538	0.000103457	0	0	1.62247e-05	8.07474e-06	0	0	0	0	1.47154e-05	1.92697e-05	5.49001e-05	1.00422e-05	0	0	0	0	0	0	0	0	0	0	0	0	0	0	0	0	0
ZOTU1438	0	0	0	0	0	0	3.51572e-05	0	0.00315322	0.00400331	0	0	0	0	0	0	0	0	0.00025344	0	0	0	0	0	0	0	0	0	0.00117723	0.00921091	0.00208121	0.00118498	0.00123774	6.99512e-05	2.06203e-05	0.000592034	0.00018631	0.00145878	2.60586e-05	0	0	0.00210603	0	0.00327356	0.000294676	2.26701e-05	0	0	0
ZOTU521	0	0	0	0	0	0	0	0	0.000214992	0.000581917	0	0	0	0	0	0	0	0	0	0	0	0	0	0	0	0	0	0	0	5.7809e-05	1.49727e-05	0	0	0	0	5.38213e-05	1.24207e-05	0.000306038	0	0	0.000372542	0.000503617	0	0	0.00559066	0.0121058	0.00144437	0	0
ZOTU2469	0	0	0	0	0	0	0	7.14679e-06	7.1664e-05	7.01105e-06	0	0	0	0	0	0	0	0	1.2672e-05	0	0	0	0.000941031	8.88221e-05	0	0	0	0.000131165	0	0.000250506	0.0239764	0.00133561	0.00314053	0	2.06203e-05	0.000179404	2.48413e-05	0	0	0	0	0	0	0	0	0	0	0	0
ZOTU4701	0	0	0	0	0	0	8.20335e-05	0.000285872	0.00257991	0.00305682	0	0	0	0	0	0	0	0	1.2672e-05	0	0	0	0	0	0	0	0	0	0.00394373	0.000867136	0.00264519	0.00069291	0.00282648	0.000126786	0	0.00186581	0.000894288	0.00376427	0	0	0	0.000240363	0	0	0.00452655	4.53402e-05	0	0	0
ZOTU4157	0	7.71361e-06	0	0	0	0	0	2.14404e-05	0.000644976	0.000974536	0	0	0	0	0	0	0	0	0	0.000465557	0	0	8.11234e-06	0	0	0	0	0	0.0036347	0.00360343	0.0134755	0.000662784	0.00258632	0	0	0.000448511	0.000173889	0.000408051	0	0	0	8.01209e-05	1.37125e-05	0	0.00202181	0.000226701	1.79425e-05	0	0
ZOTU423	0	0	0	0	0	0	0	0	0	0	0	0	0	0	0	0	0	0	5.06881e-05	1.72429e-05	0	0.00732914	0	0	0	0	0	0	0	0	0	0	0	0	0	0	0	0	0	0	0	0	0	0	0	0	0	0	0
ZOTU5887	0	0	0	0	0	0	0	0	0	0	0	0	0	0	0	0	0	0	0	0	0	0	0	0	0	0	0	0	0	0	0	0	0	0	0	0	0	1.02013e-05	0	0	0	0	0	0	0	0	0.000242224	0	0
ZOTU6105	0.00455393	0	0	0	0	0.00589506	0.000316415	0	0	0	0	0	0	0	0	0	0	0.00718705	0.000380161	0	0	0	0	0	0	0	0	0	1.47154e-05	0	0	0	0	0.000668908	0.00633042	0.00288841	0.000161469	2.04025e-05	0.000547231	0	0	0	0	0	0	0	0	0	0
ZOTU232	0.00178039	0.0269899	0	0	0	0	1.17191e-05	0	0	3.50552e-05	0	0	5.92796e-06	0	0	0	0	0	0	3.44857e-05	0	0	0	0	0	0	0	0	0	0	9.98183e-06	1.00422e-05	0	0	0	0	0	0	6.51466e-06	0	0	0	0	1.47458e-05	0	0	0	0	0
ZOTU1047	0.000205896	0.000431962	0	0	0	8.82055e-05	0.000750021	0.00197966	0.00136162	0.000757193	0	1.24333e-05	0	0	0	0	0	0	0.00105178	0.00250022	0.00093912	0.00176718	0.000129797	1.61495e-05	0	0	0	0	0.00105951	0.000308315	0.00438202	0.000522193	0.000831317	9.18109e-05	8.2481e-05	0.000753498	0.00119238	0.00115274	0	0	1.96075e-05	0.000171688	0.00562214	0.000398136	0.000188265	0	0	0	0
ZOTU4598	9.68922e-05	0.000146559	0	0	0	0.00288138	0.00125394	0.00170094	0.00128995	0.000567895	4.81487e-05	0	0	0	0	0	0	0.00016671	0.000544897	0.000810415	0	0	0	0	0	0	0	0	0.000809347	0.000192697	0.000833483	0.00137578	0.000369474	0.00017925	0.000433025	0.000914962	0.00145322	0.000734492	0.000592834	0.00502844	0.00152938	0.00143073	0.00198832	0.0010617	0.000122782	1.1335e-05	0	0	0
ZOTU4700	0	0	0	0	0	0	0.0002461	0.000171523	0.000429984	0.00176678	0	0	0	0	0	0	0	0	0	0	0	0	0	0	0	0	0	0	0.000706339	0.000944214	1.99637e-05	0	0.000258632	1.31158e-05	4.12405e-05	0.00186581	0.000707978	0.00107113	0	0	0	0.000618075	0	0.00370119	0.00239834	0.00689171	0.000959925	0	0
ZOTU1411	0	0	1.37675e-05	0.000144561	0.0112164	0	0	0	0	0	2.40743e-05	0.000907633	0.0115121	0.00130866	0	0.000473539	0	0	0	0	4.94274e-05	0.000334834	0	0	0	0.000124278	0.000972176	0.00106025	0	0	0	0	0	0	0	0	0	0	0	0	0	0	0	0	0	0	0	0	0
ZOTU1447	0	0	0	0	0	8.82055e-05	0	0	0	0.000511807	0	0	0	0	0	0	0	0	6.33601e-05	0	0	0	0	0	0	0	0	0	0.00128024	0.00173427	0.0135453	0.00268126	0.00389795	0	0	0	3.7262e-05	0.000234629	7.16612e-05	0	0	0.000400604	0	0	0.0034297	0	0	0	0
ZOTU6097	0	0	0	0	0	0.00470429	0.00108987	0.00201539	0.000859968	1.40221e-05	0	0	0	0	0	0	0	0	0	0	0	0	0	0	0	0	0	0	0.000250162	0.000211966	9.98183e-06	0.000441856	0	0.000218597	0.00286622	0.0025296	0.00140353	0.000499862	0.000566775	0.00827327	0.000490186	0.000778317	0	0	0.000343789	0	0	0	0
ZOTU5123	0	0	0	0	0	0	0	0	0	0	0	0	0	0	0	0	0	0	0	0	0	0	0	0	0	0	0	0	0	0	0	0	0	0	0	0	0	0	0	0	0	0	0	0	0	0	0.000448563	0.00334803	0
ZOTU631	0	0	0	0	0	0	0	0	0	0	0	0	0	0	0	0	0	0	0	0	0	0	0	0	0	0	0	0	0	0	0	0	0	0	0	0	0	0	0	0	0	0	0	0	0	0	0	0.00580485	0
ZOTU404	0.0242836	0.000377967	0	0	0	0	0	0	0	0	0	0	0	0	0	0	0	0.00120402	0.000836353	6.89715e-05	0	0	0	0	0	0	0	0	1.47154e-05	0	0	0	0	0	0	0	0	0	0	0	0	0	0	0	0	0	0	0	0
ZOTU1351	0	0	4.13024e-05	0.00160824	0	0	0	0	0	0	0.000288892	0	0	0	0	0	0	0	0	0	0	0	4.8674e-05	0.000799399	0.0031091	0.00694712	0.00590689	0.00641614	0	0	0	0	0	0	0	0	0	0	0	0	0	0	0	0	0	0	0	0	0
ZOTU1124	0	0	0	0	0	0	0	0	0	4.20663e-05	0	0	0	0	0	0	0	0	1.2672e-05	0	0	0	0	0	0	0	0	0	0	0	6.98728e-05	1.00422e-05	0.000461843	0	0	0	0	0	0	0	0	0	0	0	0.000605723	0.00013602	8.97127e-06	0	0
ZOTU8458	0.000193784	0	0	0	0	0.0015583	0.000421887	0.000228697	0.00035832	4.90773e-05	0	0	0	0	0	0	0	7.40933e-05	0.000114048	0	0	0	0	0	0	0	0	0	0.000691624	7.70787e-05	0.000114791	0	0	0.00199798	0.0118979	0.00545389	0.000645874	0.000785498	7.16612e-05	0	0.000647046	0.000343375	0	0	0	0	0	0	0
ZOTU7665	0	0	0	0	0	0	0	0	7.1664e-05	2.80442e-05	0	0	0	0	0.0247039	0	0	0	0	0	0	0	0	0	0	0	0	0	5.88616e-05	0	0	0.000311307	3.69474e-05	0	0	0	0	3.06038e-05	0	0	0	0	0	0	0.000294676	0	0	0	0
ZOTU8452	0.00215585	0.000370253	0	0	0	0.000573335	0.00176958	0.000728972	0.00035832	0.000119188	0.00139631	0	0	0	0	0	0	0.00698329	0.00188813	0.000706957	0	0	0	0	0	0	0	0	0	3.85394e-05	4.99092e-06	0	0	0.00013553	0.00251567	0.00125583	0.00037262	0.000204025	0.000599349	0.00103481	0.00164703	0.00041205	0	0	0	0	0	0	0
ZOTU395	0	0	0	0	0	0	0	0	0	0	0	0	0	0	0	0	0	0	0	0	0	0	1.62247e-05	0.00016957	0.00353408	0.0109116	0.00507008	0.00555264	0	0	0	0	0	0	0	0	0	0	0	0	0	0	0	0	0	0	0	0	0
ZOTU2353	0.00111426	0	0	0	0	0.00367523	0.000281258	0	0	0	0	0	0	0	0	0	0	0	0.000684289	0	0	0	0	0	0	0	0	0	0	0	0	0	0	0.00280242	0.00991834	0.00400072	4.96827e-05	2.04025e-05	0.000677524	0	0.00198035	0	0	0	0	0	0	0	0
ZOTU1469	0	0	0	0	0	0	0	0	0	0	0	0	0	0	0	0	0	0	0	0	0	0	8.11234e-06	6.45979e-05	0.00438405	0.0189896	0.00152595	0	0	0	0	0	0	0	0	0	0	0	0	0	0	0	0	0	0	0	8.97127e-06	0	0
ZOTU4403	0.000193784	0	0	0	0	0.00474839	0.00262507	0.0016652	0.00071664	0.00239077	0	0	0	0	0	0	3.1503e-05	0	0	0	0	0	0	0	0	0	0	0	8.82924e-05	0.00237017	0	5.02109e-05	0	9.61829e-05	0.000371165	0.00116613	0.000534089	0.00230549	0.00199349	0	0.0010588	0.000217471	0	0.00159254	0.000572981	0	0	0	0
ZOTU805	0	0	0	0	0	0	0	0	0	0	0	0	0	0	0	0	0	0	0	0	0	0	0	0	0	0	0	0	0	0	0	0	0	0	0	0	0	0	0	0	0	0	0	0	0	1.1335e-05	0	0	0
ZOTU6354	0.00237386	0	1.37675e-05	1.80701e-05	0	0	0	0	0	0	0.00787231	0	0	0	0	0	0	0.0135961	0.000418177	0	0	0	2.4337e-05	1.61495e-05	0	0	0	0	0	0	0	0	0	0	6.18608e-05	0	0	0	0	0	0	0	0	0	0	0	0	0	0
ZOTU3514	0	0.000485957	0	0	0	0.00124958	0.00410167	0.000743266	0.00071664	0.00039963	0	0	0	0	0	0	0	0	0.000772993	0.000758686	0	0	0	0	0	0	0	0	0.000382601	0	0.000254537	0	0.00114537	0.000502774	0.00206203	0.00290635	0.00177615	0.0023769	0.000162866	0	0.000490186	0.000423496	0.00218029	0.000486611	0	0	0	0	0
ZOTU9413	0	0	0	0	0	0	0	0	0	2.80442e-05	0	0	0	0	0	0	0	0.000148187	0	0	0	0	0	0	0	0	0	0	0	0.000115618	0	0	0	0	0	3.58809e-05	0	8.16102e-05	0	0	0	2.28917e-05	0	0	0	0	0	0	0
ZOTU768	0	0	0	0	0	0	0	0	0	0	0	0	0	0	0	0	0	0	0	0	0	0	0	0	0	0	0	0	0	0	0	0	0	0	0	0	0	0	0	0	0	0	0	0	0	0	0.000475477	0.002228	0
ZOTU2512	0	0	5.50699e-05	0.000975786	0	0	0	0	0	0	0.00223891	0	0	0	0	0	0	0	0	0	0	0	0.000713886	0.00695235	0.00253872	0.00652458	0.00108293	0.0028419	0	0	0	0	0	0	0	0	0	0	0	0	0	0	0	0	0	0	0	0	0
ZOTU362	0	0.000262263	0	0	0	0	0.000515639	0.000328752	0.00193493	0.00477452	0	0	0	0	0	0	0	0	1.2672e-05	0.00118976	0	0	0	0	0	0	0	0	0.000603332	0.00161865	0.00408257	0	0.000314053	0.000122415	4.12405e-05	0.00172228	0.0022854	0.00113234	7.81759e-05	0	0	0.000457834	0.001097	0.00115017	7.3669e-05	0	0	0	0
ZOTU473	0	0	0	0	0	0	0	0	0	0	0	0	5.92796e-06	0	0	0	0	0	0	0	0	0	0	0	0	0	0	0	0	0	0	0	0	0	0	0	0	0	0	0	0	0	0	0	0	0	0	0.000373341	0
ZOTU8864	0	0	0	0	0	0	2.34381e-05	0.000929082	0.00236491	0.00287453	0	0	0	0	0	0	0	0	0	0.00134494	0	0	0	0	0	0	0	0	0.0017217	0.00242798	0.00144237	0.000190801	0.000369474	3.49756e-05	0	0.000897022	0.00181342	0.00363165	0	0	0	0.000835546	0.00106958	0.000398136	0.00104774	0	9.86839e-05	0	0
ZOTU1431	4.84461e-05	0.000269976	0	0	0	0	7.03144e-05	3.57339e-05	0.000788304	0.00112878	0	0	5.92796e-06	0	0	0	0	0	0	0.000500043	0	0	0	0	0	0	0	0	0.00129496	0.000655169	0.0015372	0.00917855	0.00258632	3.93475e-05	0.000123722	0.00195551	0.000149048	0.000591674	0	0	0	0	0	0	0.00265209	0	0	0	0
ZOTU1239	4.84461e-05	0.000138845	0	0	0	0	0	0	0	1.40221e-05	0	0	0	0	0	0	0	0.0184122	0.00477735	8.62143e-05	0	0	0	0	0	0	0	0	0	0	1.99637e-05	0	0	0	0	0	0	0	0	0	0	0	0	0	0	0	0	0	0
ZOTU375	0.0221883	0.00121104	0	0	0	0	0	0	0	0	0	0	0	0	0	0	0	0	0	0	0	0	0	8.07474e-06	0	0	0	0	0	0	0	0	0	0	0	0	0	0	0	0	0	0	0	0	0	0	0	0	0
ZOTU416	0	0	0	0	0	0	0	0	0	0	0	0	0	0	0	0	0	0	0	0	0	0	0	0	0	0	0	0	0	0	0	0	0	0	0	0	0	0	0	0	0	0	0	0	0	0	0	0	0
ZOTU9676	0.000218007	6.94225e-05	0	0	0	0	0.00012891	0.00119351	0.00207826	0.000778226	0	0	0	0	0	0	0	0	6.33601e-05	0.000793172	0.00372188	1.86019e-05	2.4337e-05	0	0	0	0	0	0.00348755	0.00123326	0.00172187	0.000200844	0.000720474	2.18597e-05	0.000103101	0.00172228	0.00310517	0.00100993	0	0	0.00023529	0.000240363	0	0.000353899	8.18545e-06	0	0	0	0
ZOTU6383	0	0	0	0	0	0.00271967	0.0020274	0.00152941	0.000143328	0.000238376	0	0	0	0	0	0	0	0	0	0	0	0	0	0	0	0	0	0	0.000338454	0.000173427	3.49364e-05	0.00200844	0	0.000507146	0.0033611	0.00190169	0.000819764	0.000377447	0.00037785	0.00483084	0.0013137	0.000103013	0	1.47458e-05	0	0.000181361	0	0	0
ZOTU946	0	0	0	0	0.0100152	0	0	0	0	0	0	0	5.33517e-05	0	0	0	0	0	0	0	0	0	0	0	7.82866e-05	0.000298266	0.00177207	0.0101653	0	0	0	0	0	0	0	0	0	0	0	0	0	0	0	0	0	0	0	0	0
ZOTU6265	0.000484461	0.00786788	0	0	0	8.82055e-05	0.00210943	0.000207257	0	0.000105166	0	0	0	0	0	0	0	0	0.000671617	0.00139667	0	0	0	0	0	0	0	0	0.00282536	0.000481742	0	0	0	0	0.000123722	0.000466451	0.000422303	5.10064e-05	5.21173e-05	0	0.000980373	0.0002747	0.00319502	0.000486611	0	0	0	0	0
ZOTU6539	0.0043117	0.000239122	0	0	0	0.000235215	0	0.000121495	0	0	0	0	0	0	0	0	0	0.000259326	0.0169552	0	0	0	0	0	0	0	0	0	0	0	0	0	0	0	2.06203e-05	3.58809e-05	1.24207e-05	0	0	0	0	0	0	0	0	0	0	0	0
ZOTU1393	2.4223e-05	0	0	0	0	0.000632139	9.37526e-05	0	0	0	0	0	0	0	0	1.43497e-05	3.1503e-05	0	6.33601e-05	0	0	0	0	0	0	0	0	0	0	0	0	0	0	0.00804438	0.000268063	0.000287047	0	0	0.0126906	0	0	0	0	0	0	0	8.97127e-06	0	0
ZOTU1721	0	8.48497e-05	0.0175948	0.00361402	1.50152e-05	0	0	0	0	0	0	0	0	0	0	0	0	0	0	0	0.000716697	0	0	0	0	0	0	0	0	0	0	0	0	0	0	0	0	0	0	0	0	0	0	0	0	0	0	0	0
ZOTU5794	0	0.000215981	0	0	0	0.000249915	0.00284773	0.00146509	0.000214992	5.60884e-05	0	0	0	0	0	0	0	0.000481606	0.000316801	0.00150013	0	0	0	0	0	0	0	0	0.00136853	0.000462472	0.000174682	0.000190801	0	0.000502774	0.00208265	0.00211697	0.00093155	9.18114e-05	0	0.00574605	0.000960765	2.28917e-05	0	0	0	0	3.58851e-05	0	0
ZOTU904	3.63346e-05	0.000239122	0	0	0	0.000352822	0.00186333	0.000314459	0.000573312	0.000238376	0	0	0	0	0	0	0	0	0.00119117	0.0009656	0	0	0	0	0	0	0	0	0.00128024	0.000886405	0.000229582	0.000220928	0.000480316	0.000104927	0.000247443	0.000556154	0.00103092	0.000693686	5.86319e-05	0.00426924	0.00109802	0.000950005	0.00137125	0.00249204	1.63709e-05	0	0	0	0
ZOTU979	7.26691e-05	0.000655657	0	0	0	0.000676242	0.0022149	0.00147939	0.00171994	0.000771215	0	0	0	0	0	0	0	0	0.000342145	0.000293129	0	0	0	0	0	0	0	0	0.000485608	0.000269776	1.49727e-05	2.00844e-05	0	8.3067e-05	0.000433025	0.000484392	0.00147806	0.00203005	0.000117264	0.000618805	0.00274504	0.00169398	0.00178263	0.00120915	0	0	0	0	0
ZOTU9435	9.68922e-05	0	0	0	0	0.0106141	0.00126566	0.00116493	0.000143328	6.30994e-05	0	0	0	0	0	0	0	0	0	0	0	0	6.48987e-05	0	0	0	0	0	0	3.85394e-05	9.48274e-05	0	0	4.80914e-05	0.00134032	0.0010226	0.000260834	0.000132617	0.00143974	5.20005e-05	0.00278426	2.28917e-05	0.000850177	4.42373e-05	3.27418e-05	0	0	0	0
ZOTU516	0.0105007	0	0	0	0	0	0.000292977	0	0	3.50552e-05	0	0	0	0	0	0	0	0.00916904	0.000494209	0	0	0	4.8674e-05	0	0	0	0	0	0	0	0	0	0	2.18597e-05	0.000639228	8.97022e-05	0	0.000122415	7.16612e-05	0	0	0	0	0	0	0	0	0	0
ZOTU821	0	0	0	0	0	0	0	0	0	0	0	0	0	0	0	0	0	0	0	0	0	0	0	0	0	0	0	0	0	0	0	0	0	0	0	0	0	0	0	0	0	0	0	0	0	0	0.00424341	0.00513043	0
ZOTU393	0	0	0	0	0	0	0	0	0	0	0	0	0	0	0	0	0	0	0	0	0	0	0	0	0	0	0	0	0	0	0	0	0	0	0	0	0	0	0	0	0	1.14458e-05	0	0	0	0	0.0143271	0.000252908	0
ZOTU3168	0	0	0	0	0	0	0	0	0	0	0	0	0	0	0	0	0	0	0	0	0	0	0	0	0	0	0	0	0	0	0	0	0	0	0	0	0	0	0	0	0	0	0	0	0	0	0.000224282	0.00299877	0
ZOTU305	0	0	0	0	0	0	0.00121878	0.0014365	0.000931633	0.000154243	0	0	0	0	0	0	0	0	2.5344e-05	0	0	0	0	0	0	0	0	0	7.3577e-05	0	4.99092e-06	0	0	0	0	3.58809e-05	7.4524e-05	0.000887511	0	0.0126933	0	0.000698196	0.00194718	0.000678306	0	0	0	0	0
ZOTU7797	0	0	0	0	0	0.000220514	7.03144e-05	2.14404e-05	0.00107496	0.00154243	0	0	0	0	0	0	0	0	7.60321e-05	0.0002414	0	0	0	0	0	0	0	0	0.000309023	0.000674439	0	0.000110464	0	0.000109299	0	0.000484392	0.000596192	0.00113234	0	0	0.000196075	0.00365122	0.00704824	0.00265424	0.000368345	0	0	0	0
ZOTU8916	0	0	0.00476354	0.0152873	0	0	0	0	0	0	0	0	0	0	0	0	0	0	0	5.17286e-05	0.000286679	0	2.4337e-05	0	0	0	0	0	0	0	0	0	0	0	0	0	0	0	0	0	0	0	0	0	0	0	0	0	0
ZOTU6617	0	0	0	0	0	0.00233744	0.000703144	0.000557449	0.000501648	4.20663e-05	0	0	0	0	0	0	0	0	0.000164736	0	0	0	0	0	0	0	0	0	0.000103008	0.00448984	0.000399273	0	0	0.000944341	0.00501072	0.00202727	0.000770081	0.000173422	0.000527687	0	0	0.000228917	0.000150838	0.000987967	2.45563e-05	0	0	0	0
ZOTU6393	0.0121479	0	0	0	0	0	0.0002461	5.00275e-05	7.1664e-05	2.10331e-05	0.000601859	0	0.002798	0	0	0	0	0.00296373	0.000354817	0	0	0	1.62247e-05	0	0	0	0	0	0	0	0	0	0	5.68353e-05	0.000103101	0.000143524	0.000173889	6.12076e-05	2.60586e-05	0	0	0	0	0	0	0	0	0	0
ZOTU504	0	0	0.000894885	0.00283701	0	0	0	0	0	0	0.000120372	0	0	0	0	0	0	0	0	0	0	0	0.000154134	0.00047641	0	0.000310694	0	0	0	0	0	0	0	0	0	0	0	0	0	0	0	0	0	0	0	0	0	0	0
ZOTU332	0.00182884	0.0174945	0	0	0	0	0	0	0	0	0	0	0	0	0	0	0	0	0.000101376	0	0	0	8.11234e-05	8.07474e-06	0	0	0	0	0	0	0	0	0	0	0	0	0	0	0	0	0	0	0	0	0	0	0	0	0
ZOTU3216	0	7.71361e-06	0	0	0	0	0	0	0	0	0	0	0	0	0	0	0	0	0	0	0	0	0.000121685	0.000726727	0.00416038	0.00897285	0.00340877	0.00210957	0	0	0	0	0	0	0	0	0	0	0	0	0	0	0	0	0	0	0	0	0
ZOTU4200	0.000254342	0.00036254	0	0	0	0.000749746	0.00181646	0.00175811	0.000573312	0.000189298	0.000625933	0	0	6.71107e-05	0	0	0	0.000240803	0.00115315	0.000862143	0	0	0	0	0	0	0	0	0.000912355	0.000385394	0.000494101	0.000793332	0.00064658	8.7439e-05	0.000515506	0.000645856	0.00101849	0.000530466	0.000110749	0.000800807	0.00113723	0.000652413	0.000685627	0.000914239	9.00399e-05	2.26701e-05	0	0	0.00015498
ZOTU7769	0.0112879	0	0	0	0	0	3.51572e-05	0	0	0	0.000433338	0	0.00153534	0	0	0	0	0.00587189	0.000114048	0	0	0	0	8.07474e-06	0	0	0	0	0	0	0	0	0	0	0	0	0	0	0	0	0	0	0	0	0	0	0	0	0
ZOTU1443	0	0	0	0	0	0.00204343	0.000281258	0.00122925	0.000644976	0.00026642	0	0	0	0	0	0	0	0	0.000139392	0	0	0	0	0	0	0	0	0	0.00269292	0.000154157	0	0	0	0.000791323	0.00482514	0.00304987	0.000993653	0.00112214	0.000938111	0	0	2.28917e-05	0	0	0	0	0	0	0
ZOTU2609	0.00386358	0	0	0	0	0.000249915	2.34381e-05	0.000135789	0	0	0	0	0	0	0	0	0	0.0139295	0.000342145	0	0	0	0.000154134	2.42242e-05	0	1.24278e-05	0	0	0	0	0	0	0	2.62317e-05	0.000268063	7.17618e-05	0	0	0	0	0	0	0	0	0	0	0	0	0
ZOTU1303	0	0	0	0	0	0	0	0	0	0	0	0	0	0	0	0	0	0	0	0	0	0	0	0	0	0	0	0	0	0	0	0	0	0	0	0	0	0	0	0	0	0	0	0	0	0	0	0	0
ZOTU2817	0.0149698	0.000239122	0	0	0	0.00111727	0.000421887	0.00022155	0	0	0	0	0	0	0	0	0	0.000870596	0.000519553	0	0	0	8.11234e-06	0	0	0	0	0	0	0	0	0	0	1.31158e-05	0.000185582	0.000233226	3.7262e-05	0	7.16612e-05	0	0	3.43375e-05	0	0	0	0	0	0	0
ZOTU6005	0.000339123	0	0	0	0	0.00198462	0.000175786	0	0	0	0	0	0	0	0	0	0	0	5.06881e-05	0	0	0	1.62247e-05	0	0	0	0	0	0	0	0	0	0	0.00330519	0.000886671	0.00041263	1.24207e-05	0	0.000977199	0.0106913	0	0	0	0	0	0	0	0	0
ZOTU2364	0.0154906	0.000917919	0	0	0	0	0	0	0	0	0	0	0	0	0	0	0	9.26166e-05	0.00150797	0.000793172	0	0	4.05617e-05	0	0	0	0	0	0	0	0	0	0	0	0	0	0	0	0	0	0	0	0	0	0	0	0	0	0
ZOTU7400	0.000290677	0	0	0	0	0	0	0	0	0	0	0	0	0	0	0	0	0.00140777	0.00282586	0	0	0.0143048	0	0	0	0	0	0	0	0	0	0	0	0	0	0	0	0	0	0	0	0	0	0	0	0	0	0	0
ZOTU8838	1.21115e-05	0	0	0	0	0	0	2.14404e-05	0.00136162	0.00197712	0	0	0	0	0	0	0	0	5.06881e-05	1.72429e-05	0	0	0	0	0	0	0	0	0.00328154	0.00219674	0.00275499	0.00241012	0.000665053	7.43231e-05	4.12405e-05	0.000879081	0.000434723	0.00109154	0	0	0	0.000206025	0	0.000162204	0.000433829	0	0	0	0
ZOTU1271	0	0	0	0	0	0	0	0	0	0	0	0	0	0	0	0	0	1.85233e-05	0	0	0	0	0	0.000234167	0.00485377	0.00845088	0.00505778	0.000120234	0	0	0	0	0	0	0	0	0	0	0	0	0	0	0	0	0	0	0	0	0
ZOTU3703	0.000545019	0.0023218	0	0	0	2.94018e-05	0.00087893	0.00112919	0.000143328	0.000343541	9.62974e-05	0	0	0	0	0	0	0	0.00167271	0.0016898	0	0	0	0	0	0	0	0	0.00104479	0.00156084	0.000833483	0.000833501	0.000461843	0	0	0.000287047	0.000198731	0.000122415	0	0	0	0	0.000425088	0.000235933	8.18545e-06	0.00383124	0	0	0
ZOTU972	4.84461e-05	0.000254549	0.00092242	0.000108421	0	0	0	0	0	0	9.62974e-05	0	0	0	0	0	0	0	0	0	0	0	0.0144237	0.00245472	5.5919e-05	4.97111e-05	8.61422e-05	0	0	0	0	0	0	0	0	0	0	0	0	0	0	0	0	0	0	0	0	0	0
ZOTU2432	0	0	0	0	0	0	0	2.85872e-05	0.000143328	0.000364575	0	0	0	0	0	0	0	0	0	0	0	0	0	0	0	0	0	0	0.00401731	0.000443203	0.00224591	0	0	1.31158e-05	0	0.00109437	0.000111786	0.00172401	0	0	0	0.00013735	0	0	0.00809541	0	0	0	0
ZOTU8363	0	0	0	0	0	0	0	0	0	0	0	0	0	0	0	0	0	0	0	0	0	0	0	0	0	0	0	0	0	0	0	0	0	0	0	0	0	0	0	0	0	0	0	0	0	0	2.69138e-05	0.0020594	0
ZOTU394	0	0	0	0	0	0	0	0	7.1664e-05	0.000140221	0	0	0	0	0	0	0	0	0	0	0	0	0	0	0	0	0	0	0.00481194	0.00333365	0.00277994	0.000502109	0.000665053	1.31158e-05	0	8.97022e-05	0	6.12076e-05	0	0	0	2.28917e-05	0	0	0.00563977	0	0	0	0
ZOTU837	0	0.000223695	0.00180354	0.00108421	0	0	0	0	0	0	2.40743e-05	0	0	0	0	0	0	0	0	0.000275886	0.000474503	0	0.00125741	0.00016957	1.11838e-05	0	0	0	0	0	0	0	0	0	0	0	0	0	0	0	0	0	0	0	0	0	0.000439592	0.00487752	0
ZOTU5989	0.00110215	0	0	0	0	0.00495421	0.000164067	0	0	0	0.000264818	0	0	0	0	0	0	0.00576075	0.000278784	0	0	0	0	1.61495e-05	0	0	0	0	0	0	0	0	0	0.000467798	0.000474266	0.000125583	0	0	0.00445603	0	0	0	0	0	0	0	0	0	0
ZOTU2616	0	0	0	0	0	0	0	0	0	0	0	0	0	0	0	0	0	0	0	0	0	0	0	0	0	0	0	0	0	0	0	0	0	0	0	0	0	0	0	0	0	0	0	0	0	0	0.00485345	0.00567238	0
ZOTU6971	0	0	0	0	0	0	1.17191e-05	0	0	4.20663e-05	0	0	0	0	0	0	0	0	0	0	0	0	0	0	0	0	0	0	0.003723	0.00294826	0.00133757	0.00918859	0	0	0.000103101	0.000125583	7.4524e-05	0.000183623	0	0	0	3.43375e-05	0	0	0.000122782	0	0	0	0
ZOTU2575	0	0	0	0	0	0	0	0	0.00035832	0.000126199	0	0	0	0	0	0	0	0	0	0	0.011739	0	0	0	0	0	0	0	0.000412031	0.000520281	9.98183e-06	0.000391645	0.00084979	0	0	0.000233226	0.00212393	0.00100993	0	0	0	0	0	0	6.54836e-05	3.40051e-05	0	0	0
ZOTU8835	0.000375457	7.71361e-06	0	0	0	0.000235215	0.000421887	0.000564596	0.00035832	0.000224354	0.000818528	0	0	0	0	0	0	0.000370466	0.00159667	0.00151737	0	0	0	0	0	0	0	0	4.41462e-05	0	5.49001e-05	0	0	0.000738859	0.00317552	0.00267313	0.000459565	0.000652881	0.00018241	0	0.00119605	0.0016482	0	0.000516102	0	0	0	0	0
ZOTU6410	0	0	0	0	0	0	0	0	0	0	0	0	0	0	0	0	0	0	0	0	0	1.86019e-05	0	0	0	0	0	0	0	0	1.99637e-05	6.02531e-05	0.000665053	0	0	0	0	0	0	0	0	6.8675e-05	0	0	0	0.00504409	0.00118421	0.00163788	0
ZOTU976	0	0	0	0	0	0	0	0	0.000214992	4.90773e-05	0	0	0	0	0	0	0	0	0	6.89715e-05	0	0	0	0	0	0	0	0	7.3577e-05	0	0.000474137	0	0	0	6.18608e-05	0.000107643	3.7262e-05	5.10064e-05	0	0	0	0.000103013	0	0	0.0159371	0	0	0	0
ZOTU8138	0	0	0	0	0	0	0	0	0	2.80442e-05	0	0	0	0	0	0	0	0	5.06881e-05	0	0	0	0	0	0	0	0	0	0	9.63484e-05	1.49727e-05	0	0	0	0	0	0	3.06038e-05	0	0	0	1.14458e-05	0	0	1.63709e-05	1.1335e-05	0	0	0
ZOTU5916	0.00347601	0.0068574	0	0	0	0	3.51572e-05	0.00157229	0	7.71215e-05	0	0	0	0	0	0	0	0.000981736	0.000988418	0.00286232	0	0	8.11234e-06	0	0	0	0	0	0	0	0	0	0	0.00017925	0	0.000233226	0	4.08051e-05	0	0	0	0.000354821	0	0	0	0	0	0	0
ZOTU4215	0	0	0	0	0	0	0	7.14679e-06	7.1664e-05	0.000364575	0	0	0	0	0	0	0	0	0	5.17286e-05	0	0	0	0	0	0	0	0	1.47154e-05	1.92697e-05	0.000903356	0.000130548	0.00230921	0	0	1.79404e-05	0	1.02013e-05	0	0	0	0.000206025	0	0	0.00310229	3.40051e-05	1.79425e-05	1.20433e-05	0
ZOTU4371	0.00319744	0.00111076	0	0	0	0.00111727	0.00087893	2.85872e-05	0	0	0	0	0	0	0	0	0	0.00479754	0.000582913	0	0	0	0	0	0	0	0	0	0	0	0	0	0	0.000104927	0.00164962	0.00121995	6.21033e-05	7.14089e-05	4.56026e-05	0	0.00272544	0	0	0	0	0	0	0	0
ZOTU810	0	0	0.00374475	0.00215034	0.000120122	0	0	0	0	0	0	0	0	0	0	0	0	0	0	0	0	0.0106031	0.000551639	9.68969e-05	1.11838e-05	3.72833e-05	0	0	0	0	0	0	0	0	0	0	0	0	0	0	0	0	0	0	0	0	0	0	0
ZOTU4464	0	0	0	0	0	0.00149949	0.00118363	0.000886202	0	0.000175276	0	0	0	0	0	0	0	0	1.2672e-05	0	0	0	0	0	0	0	0	0	0.000500324	0.000231236	4.49182e-05	0.00014059	0	0.00069514	0.00127846	0.000502332	0.00055893	0.000132617	0.000495114	0.00862688	0.000450972	0.000114458	0	0	0	0	0	0	0
ZOTU1644	0	0	0	0	0	0	0	0	0	0	0	0	0	0	0	0	0	1.85233e-05	0	0	0	0	8.11234e-06	0	0.0016552	0.0052818	0.00546388	0.00477658	0	0	0	0	0	0	0	0	0	0	0	0	0	0	0	0	0	0	0	0	0
ZOTU1010	6.05576e-05	0.00229094	0	0	0	0	0.00124222	0.000435954	0.000286656	0.00116383	0.000481487	0	0	0	0	0	0	0	0	5.17286e-05	0	0	0.00728488	0.000759026	0	0	0	0	5.88616e-05	0	0.000224591	5.02109e-05	1.84737e-05	0	2.06203e-05	0.000161464	0.00131659	0.00039785	6.51466e-06	0	0	9.15667e-05	0.000685627	2.94916e-05	0	0	0	0	0
ZOTU6023	0.00443282	0	0	0	0	0.000617438	0.00206256	0.000771853	0.000788304	0.00020332	0	0	0	0	0	0	0	0.000426036	0.000266112	0	0	0	0	8.07474e-06	0	0	0	0	5.88616e-05	0	0	0	0	0	0.001629	0.00157876	0.00172647	0.00116294	0.000143322	0	0.00115684	9.15667e-05	0	0	0	0	0	0	0
ZOTU1445	0	0	0	0	0	0	0	0	0	0	0	0	0	0	0	0	3.1503e-05	0	0	0	0	0	0	0	0	0	0	0	0	0	0	0	0	0	0	0	0	0	0	0	0	0	0	0	0	0	0.00401913	0.00604572	0
ZOTU1068	0.0213768	0.0601199	0	0	0	0.0129074	0.0301649	0.0618697	0.0053748	0.00278339	0.00182965	0.000285967	0	0	1.544e-05	0	0	0.0054829	0.0325671	0.00486249	0	0	8.11234e-06	0	0	0	0	0	0.00476779	0.00121399	0.00213112	0.0010946	0.00099758	0.00299041	0.0119391	0.00922139	0.0100359	0.00595754	0.00557003	0.04354	0.0258034	0.00662714	0.0471437	0.01044	0.000237378	4.53402e-05	8.97127e-06	0	0
ZOTU872	0.00501417	0.00066337	0	0	0	0.000470429	0	0.000128642	0	0	0.000288892	0	0	0	0	0	0	0.00761308	0.000367489	0.000224157	0	0	4.05617e-05	0	0	0	0	0	0	0	4.99092e-06	0.00014059	0	3.06036e-05	0.000164962	0.000251166	3.7262e-05	1.02013e-05	0.000716612	0	0.000470579	1.14458e-05	0	0.00028017	0	0	0	0	0
ZOTU2189	0	0	0	0	0	0	0	0	0	0	0	0	0	0	0	0	0	0	0	0	0	0	0	0	0	0	0	0	0	0	0	0	0	0	0	0	0	0	0	0	0	0	0	0	0	0	0	0.00051786	0
ZOTU913	0	0	0	0	0	0	3.51572e-05	2.14404e-05	0.00164827	0.00283948	0	0	0	0	0	0	0	0	0	0	0	0	0	0	0	0	0	0	0.000529755	0.00327585	0	0	0	0	0	0.00039469	0.00209909	0.003193	0	0	0.000352934	0.00232351	0	0	0	0	0	0	0
ZOTU534	0	0	0	0	0	0	0	0	0	0	2.40743e-05	0	0	0	0	0	0	0	0	0	0	0	0.000146022	0.00251124	0.00240452	0.00933325	0.00169823	0.000535589	0	0	0	0	0	0	0	0	0	0	0	0	0	0	0	0	0	0	0	0	0
ZOTU2735	0	0	0	0	0	0.000426326	0.000187505	0.000271578	0.00136162	0.000448707	0	0	0	0	0	0	0	0	5.06881e-05	0	0	0	0	0	0	0	0	0	0.000971217	0.00339146	0	0	0.000406421	7.43231e-05	8.2481e-05	0.000233226	0.00106818	0.00111194	6.51466e-05	0.000244402	7.84298e-05	0.000400604	8.22752e-05	0.00117966	0.000572981	0.000340051	0	0	0
ZOTU1127	0	0	0.000275349	0.0035056	0.00232736	0	0	0	0	0	0	0	0	0	0	0	0	0	0	0	0	0	5.67864e-05	0.000928595	0.00130851	0.00341763	0.00100909	0.00360703	0	0	0	0	0	0	0	0	0	0	0	0	0	0	0	0	0	0	0	0	0
ZOTU4940	0	0	0	0	0	0	0	0	0	0	0	0	0	0	0	0	0	0	0	1.72429e-05	0	0	0	0	0	0	0	0	0	0	0	0	0	0	0	0	0	0	0	0	0	0	0	0	0	0	0.000340908	0.000650336	0
ZOTU388	0.000290677	0.0155429	0	0	0	0	0	0	0	4.20663e-05	0	0	0	0	0	0	0	0	0	0	0	0	8.11234e-06	0	0	0	0	0	7.3577e-05	0	9.48274e-05	0	0	0	0	0	2.48413e-05	3.06038e-05	7.81759e-05	0	0.00015686	1.14458e-05	0	0	0	0	0	0	0
ZOTU7782	0	0	0	0	0	0	0	0	0	0	0	0	0	0	0	0	0	0	0	0	0	0	8.11234e-06	0	0	0	0	0	0	0	0	0	0	0	0	0	0	0	0	0	0	0	0	0	0	0	0.00028708	0.00244478	0
ZOTU6185	0	0.000100277	0	0	1.50152e-05	0.00251386	0.00131254	0.00214404	0.000644976	0.000189298	0	0	0	0	0	0	0	0	0.000367489	5.17286e-05	0	0	0	0	0	0	0	0	1.47154e-05	3.85394e-05	0.000414246	0	0	0.0003585	0.00301056	0.00139935	0.00125449	0.00117315	0.000273616	0	0.000490186	0.000148796	0	0.00038339	1.63709e-05	0	0	0	0
ZOTU863	0	0	0.001184	0.0149621	0	0	0	0	0	0	0	0	0	0	0	0	0	0	0	0.000137943	0	0	1.62247e-05	0	0	0	0	0	0	0	0	0	0	0	0	0	0	0	0	0	0	0	0	0	0	0	0	0	0
ZOTU1245	0	0	0	0	0	0.000132308	0	0	7.1664e-05	0.00020332	0	0	0	0	0	0	0	0	0	0	0	0	0	0	0	0	0	0	0	0.000115618	0	0	0.000203211	0	0	0	2.48413e-05	0.000132617	5.21173e-05	0	0	5.72292e-05	0	0	0	0.000691438	0.00197368	0	0
ZOTU8362	1.21115e-05	2.31408e-05	0	0	0	0.000352822	0.000339853	0.000328752	0.00186327	0.00106568	0	0	0	0	0	0	0	0	0.000152064	0.000672472	9.88548e-06	0	0	0	0	0	0	0	0.0011478	0.000809327	0.00121778	0.000813416	0.000387948	8.3067e-05	0.000103101	0.0010226	0.00214877	0.00140778	0	5.20005e-06	0.000254897	0.00160242	8.22752e-05	0.000147458	5.72981e-05	6.80102e-05	8.97127e-06	0	0
ZOTU6134	0	0	0	0	0	0.00388104	0.000398448	2.85872e-05	0	0	0	0	0	0	0	0	0	0.000852073	1.2672e-05	0	0	0	0	0	0	0	0	0	0	0	0	0	0	0.000585841	0.00466018	0.00170434	0	0	0.00321824	0	0.000901943	0	0	0	0	0	0	0	0
ZOTU8328	0	7.71361e-06	0	0	0	0	0	0	0	3.50552e-05	0	0	0	0	0	0	0	0	0	0	0	0	0	0	0	0	0	0	0	0	0	0	0	0	0	0	0	0	0	0	0	0	0	0	0	0.000238036	0.00021531	0.000638293	0
ZOTU9727	1.21115e-05	0.00019284	0	0	0	0.000382224	0.00037501	0.00075756	0.000859968	0.000715127	0.000192595	2.48667e-05	0	3.35554e-05	0	0	0	0	0.000228096	0.0008449	0.000563472	0	8.11234e-06	0	0	0	0	0	0.000426747	0.000154157	0.00112795	0.000823459	0.00121926	8.3067e-05	0.000185582	0.000251166	0.000173889	0.000316239	0.000110749	0.000717606	0.000764691	0.00147651	0.000356526	0.000870001	0.000491127	1.1335e-05	0	0	0.000823332
ZOTU698	0	0	0.000220279	0.00113842	0.00159162	0	0	0	7.1664e-05	0	0	0	0	0	0	0	0	0	0	0	0	1.86019e-05	8.11234e-06	0.000823623	0.00325449	0.00567949	0.00105832	0.00207678	0	0	0	0	0	0	0	0	0	0	0	0	0	0	0	0	0	0	0	0	0
ZOTU4361	0	0	0	0	0	0.000279317	0.00268367	0.00155085	0.000644976	0.000252398	0	0	0	0	0	0	0	0	0.000304129	0.0001207	0	0	0	0	0	0	0	0	0.000882924	0.000134888	0.000778583	0.00110464	0.000775896	1.31158e-05	0.00076295	0.00104055	0.00202457	0.000612076	0	0	0.000725476	0.000778317	0	0	3.27418e-05	0	0	0	0
ZOTU940	0	0.00128817	0	0	0	8.82055e-05	0.000539077	0.000150083	0.000214992	0.000329519	0.000264818	0	0	0	0	0	0	0.000463083	0.00121651	0.000517286	0	0	0	0	0	0	0	0	0.000426747	0.000558821	0.0002196	0.000150633	0.00064658	0	0.000123722	0.000448511	0.000621033	0.000377447	0	0	0.00280387	0.00157953	0	0.00272797	8.18545e-06	0	0	0	0
ZOTU4239	0	0	0	0	0	7.35045e-05	7.03144e-05	7.86147e-05	0.000286656	0.000511807	0	0	5.92796e-06	0	0	0	0	0	0.000418177	0	0	0	0	0	0	0	0	0	0	0.000269776	0	0	0	0.000148646	0.000185582	0.00041263	0.000161469	0.000224428	0.000338762	0.00934448	0.00149017	1.14458e-05	0.00102844	0.000678306	0	0	0	0	0
ZOTU796	0	0	0	0	0	0	0	0	0	0	0	0	0	0	0	0	0	0	0	0	0	0	0	0	0	0	0	0	0	0	0	0	0	0	0	0	0	0	0	0	0	0	0	0	0	0	0.000134569	0	0
ZOTU531	0	0	0	5.42103e-05	0	0	0	0	0	0	0	0	0	0	0	0	0	0	0	0	0	0	0.000121685	0.00418272	0.00445115	0.00443671	0.000295345	0.00083071	0	1.92697e-05	0	0	0	0	0	0	0	0	0	0	0	0	0.00134383	0	0	0	0	0	0
ZOTU8311	0	0	0	0	0	0	3.51572e-05	0	0.000214992	0.000140221	0	0	0	0	0	0	0	0	0	0	0	0	0	8.07474e-06	0	0	0	0	0	0.000308315	0.000234573	1.00422e-05	0	0	0	0	9.93653e-05	8.16102e-05	0	0	0.000196075	0.000423496	0	0	0.00600812	0.00205164	0.000278109	0.00130067	0
ZOTU6420	0	0	0	0	0.0065016	0	0	0	0	0	0	0.000273533	0.00413179	0.000603996	0	0	0	0	0	0	0	0	8.11234e-06	8.07474e-06	1.11838e-05	0.000285839	0.0022397	0.00160677	0	0	0	0	0	0	0	0	0	0	0	0	0	0	0	0	0	0	0	0	0
ZOTU825	0	0	0	0	0	0	0.000222662	0.000207257	0.00222159	5.60884e-05	0	0	0	0	0	0	0	0	0	0	0	0	0	0	0	0	0	0	0.000132439	9.63484e-05	0	0	0	0	0.000185582	0.000269107	0.00247171	0.00175462	0	0	0.000117645	0.000320483	0.00327729	0.00421729	0	0	0	0	0
ZOTU717	0	0	0	0	0	0	0	0	0	0	0	0	0	0	0	0	0	0	0	0	0	0	0	0	0	0	1.2306e-05	0	0	0	0	0	0	0	0	0	0	0	0	0	0	0	0	0	0	0	0.0069617	0.00244478	0
ZOTU566	0	0	0	0	0	7.35045e-05	0.000140629	0	0.000859968	0.000497785	0	0	0	0	0	0	0	0	8.87042e-05	0	0	0	0	0	0	0	0	0	0.000824063	0.00159938	0.00189655	0.00222936	0.000535737	9.61829e-05	6.18608e-05	0.000233226	0.000434723	0.00103033	0	0	0.00125488	0.00212893	0	0.000899493	0.000139153	0	0	0	0
ZOTU1196	0	0	0	0	0	0	0	0	0	0	0	0	0	0	0	0	0	0	0	0	0	0	0	0	0	0	0	0	0	0	0	0	0	0	0	0	0	0	0	0	0	0	0	0	0	0	2.69138e-05	0.00112002	0
ZOTU6002	0.00274932	8.48497e-05	0	0	0	2.94018e-05	0	0	0	0	0	0	0	0	0	0	0	0.0120402	0.00012672	0	0	0	8.11234e-06	1.61495e-05	0	1.24278e-05	0	0	0	0	0	0	0	4.37195e-06	0	1.79404e-05	0	0	0	0	0	0	0	0	0	0	0	0	0
ZOTU499	0	0.01255	0	1.80701e-05	0	0	0	0	0	0	0.00233521	0	0	0	0	0	0	0	0	1.72429e-05	0	0	9.73481e-05	2.42242e-05	0	0	0	0	0	0	0	0	1.84737e-05	0	0	0	0	0	0	0	0	0	0	0	0	0	0	0	0
ZOTU529	0	0	0	0	0	0	0	0	0	0	0	0	0	0	0	0	0	0	0	0	0	0	0	0	0	0	0	0	0	0	0	0	0	0	0	0	0	0	0	0	0	0	0	0	0	0	0.00596589	0.000541947	0
ZOTU4480	0.000363346	0.000354826	0	0	0	0	9.37526e-05	0.00404508	0.000429984	9.11436e-05	0.000385189	1.24333e-05	0	0	0	0	0	0	0.00019008	0.00127597	0.00497734	0	0.00010546	0	0	0	0	0	5.88616e-05	9.63484e-05	3.49364e-05	1.00422e-05	1.84737e-05	0	2.06203e-05	0.000143524	0.000397461	0.000489661	0	0	1.96075e-05	5.72292e-05	0.000877602	0.000412882	0	0	0	0	0
ZOTU5936	8.47807e-05	0	0	0	0	0.00357232	0.000187505	0	0	0	0	0	0	0	0	1.43497e-05	0	0.000129663	0	0	0	0	0	0	0	0	0	0	0	0	0	0	0	0.00656667	0.000639228	0.000143524	0	0	0.00358958	0	0	0	0	0	0	0	0	0	0
ZOTU8449	0	7.71361e-06	0	0	0	0	0	0	0.00035832	0.000245387	0	0	0	0	0	0	0	0	0	0	0	0	0	0	0	0	0	0	0.00223674	0.00391174	0.000494101	0.00549307	0.00149637	0	0	1.79404e-05	1.24207e-05	5.10064e-05	0	0	0	0.000228917	0	0	0.000278305	0	0	0	0
ZOTU5209	0	0	0	0	0	0.000735045	0.000351572	2.14404e-05	0.00071664	2.80442e-05	0	0	0	0	0	0	0	0.00016671	0	0	0	0	0	0	0	0	0	0	0	0	0	0	0	0.00126349	0.00682531	0.00265518	0.00110544	0.00102013	0	0	0	0	0	0	0	0	0	0	0
ZOTU3475	0	0	0	0	0.0145798	0	0	0	0	0	0	0	5.92796e-06	0	0	1.43497e-05	0	0	0	0	0	3.72038e-05	0	0	0	2.48555e-05	0.00012306	4.37216e-05	0	0	0	0	0	0	0	0	0	0	0	0	0	0	0	0	0	0	0	0	0
ZOTU4275	0	0	0	0	0	0	0	0	0	0	0	0	0	0	0	0	0	0	0	0	0	0	5.67864e-05	0.000363363	0.000615109	0.00480954	0.00750668	0.00137723	0	0	0	0	0	0	0	0	0	0	0	0	0	0	0	0	0	0	0	0	0
ZOTU4465	0	0	0.00184484	0.00917962	0	0	0	0	0	0	0.000192595	0.0001119	0	0	0	0	0	0	0	0.000534529	0.00145317	0	0.00010546	0.00125158	1.11838e-05	0	0	1.09304e-05	0	0	0	0	0	0	0	0	0	0	0	0	0	0	0	0	0	0	0	0	0
ZOTU1470	0	0	0	0	0	0	0	0	0.00150494	0.00550367	0	0	0	0	0	0	0	0	0	0	0	0	0	0	0	0	0	0	4.41462e-05	0.000423933	0.000913338	0.000150633	0	0	0	3.58809e-05	0.000310517	0.00190764	3.90879e-05	0	0	0.00378857	0	0	2.45563e-05	0	0	0	0
ZOTU432	0.00122326	0.0133754	0	0	0	0	0	0	0	0	0	0	0	0	0	0	0	0	0	0	0	0	0	0	0	0	0	0	0	0	0	0	0	0	0	0	0	0	0	0	0	0	0	0	0	0	0	0	0
ZOTU6364	0.000375457	0	0	0	0	0	7.03144e-05	0	0	0	0	0	0	0	0	1.43497e-05	0	0.0124291	0.000380161	0	0	0	1.62247e-05	0	0	1.24278e-05	0	0	0	0	0	0	1.84737e-05	0.000113671	0.000412405	0.000609975	0	0	0.000104235	0	0	0	0	0	0	0	0	0	0
ZOTU1032	0	0	0	0	0	0	0	0	0	0	0.000144446	0	0	0	0	0	0	0	0	0	0	0	0.00107083	0.0107475	0.00143153	0.0002237	0.000910646	0	0	0	0	0	0	0	0	0	0	0	0	0	0	1.14458e-05	0	0	0	0	0	0	0
ZOTU6068	0	0	0	0	1.50152e-05	0	1.17191e-05	0	0	0	0	0	0	0	0	0	0	0.00022228	3.80161e-05	0.00160359	0.00604003	0	0	0	0	0	0	0	0.00179528	0.00059736	0.000638837	0.00184776	0.00158874	0	0	0.000107643	1.24207e-05	0	0	0	0	0	0	0	0	0	0	0	0
ZOTU4936	0.00265242	0	0	0	0	0	0	0	0	0	0	0	0	0	0	0	0	0.0114104	0.000278784	0	0	0	0	0	0	0	0	0	0	0	0	0	1.84737e-05	0	0	0	0	0	0	0	0	0	0	0	0	0	0	0	0
ZOTU578	0	0.0069731	0.00421285	0.000686664	0	0	0	0	0	0	0	0	0	0	0	0	0	0	0	0	0	0	0.00106272	3.2299e-05	0	0	0	0	0	0	0	0	0	0	0	0	0	0	0	0	0	0	0	0	0	0	0.000484448	0.000349255	0
ZOTU1005	0	0.000740506	0	0	0	0.000117607	0.00126566	0.000293018	0.00107496	0.000476751	0	0	0	0	0	0	0	0	0.000304129	0.000189672	0	0	0	0	0	0	0	0	0.000161869	0.000655169	3.49364e-05	0	0	0.000306036	0.000206203	0.000574094	0.00116754	0.000907913	0	0	0.00101959	0.00186567	0.0019746	0.000914239	0	0	0	0	0
ZOTU815	0	0	0	0	0	0	0	0	0	0	0	0	0	0	0	0	0	0	0	0	0	0	8.11234e-06	0	0.000671028	0.00387746	0.00680523	0.00285283	0	0	0	0	0	0	0	0	0	0	0	0	0	0	0	0	0	0	0	0	0
ZOTU4427	0	0	0	0	0	0.00176411	0.000679706	0.00113634	0	0	0	0	0	0	0	0	0	0.00188938	0.000215424	0	0	0	0	0	0	0	0	0	0	0	0	0	0	0.000520262	0.00119597	0.000932903	0.000621033	0	0.000586319	0	0.00172546	0	0.00256424	0.000265424	0	0	0	0	0
ZOTU895	0	0	0	0	0	0.000543934	0	0	0	0	0	0	0	0	0	0	0	0	0	0	0	0	0	0	0	0	0	0	0	0	0	0	0	0.000271061	0.0132176	3.58809e-05	0	0	1.9544e-05	0	0	0	0	0	0	0	0	0	0
ZOTU1632	0	0	0	0	0	0	0	0	0	0	0	0	0	0	0	0	0	0	0	0	0	0	0	0	0	0	0	0	0	0	0	0	0	0	0	0	0	0	0	0	0	0	0	0	0	0.0125819	0	0	0
ZOTU6565	0	0	0	0	0	0.00185231	0.000328134	0.000628917	0.000214992	0.000645017	0	0	0	0	0	0	0	0	0	0	0	0	0	0	0	0	0	0	0.00147154	0.00113691	0.000563974	0.000451898	0.00014779	0.000786951	0.000639228	0.000538213	0.00057135	0.000438655	0.00037785	4.16004e-05	0	0.000297592	0	0	0.000196451	0.00011335	0	0	0
ZOTU368	0	0.000223695	0	0	0	4.41027e-05	0.00076174	7.86147e-05	0	1.40221e-05	0	0	0	0	0	0	0	0	0.000101376	0.000137943	0	0	0	0	0	0	0	0	0	0	0	0	0	0.000249201	0.00138156	0.000125583	0.000124207	0	5.21173e-05	0.00979689	0.000313719	0.000217471	0	0.00028017	0	0	0	0	0
ZOTU6330	0	0	0	0	0	0.00016171	0.000843773	0.000543156	0.000859968	0.00103764	0	0	0	0	0	0	0	0	0	0	0	0	0	0	0	0	0	0	0.000294308	3.85394e-05	0.000539019	0.00142599	0	9.18109e-05	0.000123722	0.000932903	0.00327906	0.00117315	0	0	0	0.000171688	0.00224886	0	0	0	0	0	0
ZOTU5948	0	0	0	0	0	0.00523352	0.000328134	7.14679e-06	7.1664e-05	0	0	0	0	0	0	0	0	0	0	0	0	0	0	0	0	0	0	0	0	0	0	0	0	0.00120229	0.00348482	0.000753498	0.000285675	0.000153019	0.00223453	0	0	0	0	0	0	0	0	0	0
ZOTU4578	0	0	0	0	0	0.0031754	0.000867211	0.000250138	0	4.20663e-05	0	0	0	0	0	0	0	0	0.00140659	0	0	0	0	0	0	0	0	0	0	0	0	0	0	0.000441567	0.00259815	0.000843201	0.000919129	0.000255032	0.00145277	0	0.000274504	0.000263254	1.37125e-05	0.000884747	0	0	0	0	0
ZOTU8376	0	0	0	0	0	0.000705644	0.00355088	0.000493128	0.000931633	6.30994e-05	0	0	0	0	0	0	0	0	0.000177408	0	0	0	0	0	0	0	0	0	0.000809347	0.000886405	1.49727e-05	0	0.000110842	0.000183622	0.00212389	0.000609975	0.000235993	0.000448856	1.9544e-05	0	0.000686261	0.000652413	0.000438801	0.000530848	0	0	0	0	0
ZOTU767	0	0	0	0	0	7.35045e-05	0.000164067	0	0.00071664	0.000834315	0	0	0	0	0	0	0	0	0.000202752	0.000258643	0	0	0	0	0	0	0	0	0.000147154	0.000173427	0	0	0	0	8.2481e-05	0.000340868	0.0010806	0.00133637	0.000286645	0	0.00286269	0.0034452	0	0.00165153	0	0	0	0	0
ZOTU9163	0	0	0	0	0	0	0	0	0	0	0	0	0	0	0	0	0	0	0	0	0	0	0	0	0	0	0	0	0	0	0	0	0	0	0	0	0	0	0	0	0	0	0	0	0	0	4.48563e-05	0.00220392	0
ZOTU4131	0	0	0	0	0	0	0	0	0.000501648	8.41326e-05	0	0	0	0	0	0	0	0	0	0.00515562	0	0	0	0	0	0	0	0	0.00073577	0.00165719	0.000334391	0.000522193	7.38948e-05	3.93475e-05	0	0.000233226	0.000894288	0.00135677	3.90879e-05	0	0	0.00013735	0.00152209	0	5.72981e-05	0	0	0	0
ZOTU1110	0.000169561	0.00764419	2.75349e-05	0	0	0	0	0	0	0	0	0	0	0	0	0	0	0	0	0	0	0	0.00553262	0.000104972	0	0	0	0	0	0	0	0	0	0	0	0	0	0	0	0	0	0	0	0	0	0	0	0	0
ZOTU506	0	0	0	0	0	0	0	0	0	0	0	0	0	0	0	0	0	0	0	1.72429e-05	0	0	0.000705774	0.0107233	0.00130851	0.000273411	0.000344569	0	0	0	0	0	0	0	0	0	0	0	0	0	0	0	0	0	0	0	0	0	0
ZOTU1693	0	0	0	0	0	0	0	0	0	0	0.00380375	0	0	0	0	0	0	0	0	0	0	0	0.00010546	0.00360941	0.0011743	0.00344249	0.000627607	0	0	0	0	0	0	0	0	0	0	0	0	0	0	0	0.000603351	0	0	0	0	0	0
ZOTU7272	0	0	0	0	0	0.000117607	0.00037501	0.000164376	0.000573312	0.000231365	0	0	0	0	0	0	0	0	0.000266112	0	0	0	0	0	0	0	0	0	0.00129496	0.00115618	0	0	0	0.000297292	0.00334048	0.00292429	0.00146564	0.00104053	0	0	0	0.000103013	0	0	0	0	0	0	0
ZOTU9304	0	0	0	0	0	0	0	0	0	0	0	0	0	0	0	0	0	0	0	0	0	0	0	0	0	0	0	0	0	0	0	0	0	0	0	0	0	0	0	0	0	0	0	0	0	0	0.00241327	0.00158971	0
ZOTU4348	2.4223e-05	0	0	0	0	0.00373403	0.000585954	0	0	1.40221e-05	0	0	0	0	0	0	0	0.00285259	0.000101376	0	0	0	0	0	0	0	0	0	2.94308e-05	0	0	0	0	0.000813182	0.00177334	0.000914962	9.93653e-05	3.06038e-05	0.00188274	0	0.000450972	0	0	0	0	0	0	0	0
ZOTU7940	0	0	0	0	0	0	0	0	0	0	0	0	0	0	0	0	0	0	0	0	0	0	1.62247e-05	2.42242e-05	7.82866e-05	0.0002237	0.00360567	0.00935642	0	0	0	0	0	0	0	0	0	0	0	0	0	0	0	0	0	0	0	0	0
ZOTU8069	0	0	0	0	0	5.88036e-05	0.000152348	0.000100055	0.00107496	0.0020963	0	0	0	0	0	0	0	0	0.000202752	0	0	0	0	0	0	0	0	0	2.94308e-05	0.00123326	0.000184664	3.01265e-05	5.54211e-05	4.80914e-05	4.12405e-05	0.000358809	0.0011427	0.00142818	2.60586e-05	0	0	0.00255242	0.000562214	0.000353899	0.000761247	0	0	0	0
ZOTU6326	0	0	0	0	0	0.000441027	0.000796897	0.00155085	0.00171994	0.000301475	0	0	0	0	0	0	0	0.000129663	0.000215424	0	0	0	0	0	0	0	0	0	0.000779916	0.000963484	5.9891e-05	0	0	4.37195e-05	0.000845431	0.00107643	0.000633454	0.00104053	3.25733e-05	0	0	0	0.00237227	0	0	0	0	0	0
ZOTU4256	3.63346e-05	0.0109842	9.63723e-05	1.80701e-05	0	0	4.68763e-05	0	7.1664e-05	0.000806271	0	0	0	0	0	0	0	0	0	0.000103457	0	0	0	0	0	0	0	0	0	5.7809e-05	1.49727e-05	0	1.84737e-05	0	0	0	6.21033e-05	0.000295837	0	0	0	0.000331929	0	0	0	0	0	0	0
ZOTU8506	0.000460238	0	0	0	0	0.00151419	0.000105472	0	0	0	0	0	0	0	0	0	0	0.00279702	2.5344e-05	0	0	0	0	0	0	0	0	0	0	0	0	0	0	0.00211165	0.0029487	0.000950843	4.96827e-05	0	0.00192834	0	0	0	0	0	0	0	0	0	0
ZOTU9429	0	0	0	0	0	5.88036e-05	8.20335e-05	3.57339e-05	0.00071664	0.00236272	0	0	0	0	0	0	3.1503e-05	0	0	0	0	0	0	0	0	0	0	0	0.000485608	0.00154157	0	2.00844e-05	0	0	0	0.00039469	0.00154016	0.00225448	0	0	0.00107841	0.000503617	0	0.0012239	0.000368345	0	0	0	0
ZOTU1295	0	0	0	0	0	8.82055e-05	1.17191e-05	0	0.00035832	0.000546862	0	0	0	0	0	0	0	0	0	0.0001207	0	0	0	0	0	0	0	0	0	0.000211966	3.49364e-05	0	0	0	0	3.58809e-05	0.00037262	0.000826303	0.000110749	0	0.000431364	0.00239218	0.00145353	0.00572136	8.18545e-06	6.80102e-05	0	0	0
ZOTU6569	0	0	0	0	0	0.00535113	0.000667987	5.00275e-05	0	6.30994e-05	0	0	0	0	0	0	0	0	0.000101376	0	0	0	0	0	0	0	0	0	0	0	0	0	0	0.000861274	0.00323738	0.00174022	0	5.10064e-05	0.000651466	0	0	0	0	0	0	0	0	0	0
ZOTU9235	9.68922e-05	0.000138845	0	0	0	0.000235215	0.000843773	0.000335899	0.000429984	6.30994e-05	0	0	0	0	0	0	0	0.00103731	0.00120384	0	0	0	0	0	0	0	0	0	0	0	0	0	0	0.00144274	0.00352606	0.001507	0.000285675	0.000897712	0.000247557	0	0.000137252	0.000320483	0	0	0	0	0	0	0
ZOTU4891	0.00234964	0	0	0	0	0	0	0	0	0	0	0	0	0	0	0	0	0.00952099	0.000240768	0	0	0	0	0	0	0	0	0	0	0	0	0	0	6.99512e-05	0.000164962	0.000179404	0	0	0	0	0	0	0	0	0	0	0	0	0
ZOTU8762	0	0	0.00123907	0.00805927	0	0	0	0	0	0	7.2223e-05	0	0	0	0	0	0	0	0	0	0	0	0.000146022	0.000258392	0	0	0	0	0	0	0	0	0	0	0	0	0	0	0	0	0	0	0	0	0	0	0	1.20433e-05	0
ZOTU5958	0	0	0	0	0	0.000514532	0.00112503	0.000307312	0	0	0	0	0	0	0	0	0	0.000185233	8.87042e-05	0	0	0	0	0	0	0	1.2306e-05	0	0	0	0	0	0	0.00147772	0.0012166	0.000484392	3.7262e-05	0	0.000534202	0.00529365	0	0	0.00106958	0	0	0	0	0	0
ZOTU1482	0	0	0	0	0	0	0	0	0	0	0	0	0	0	0	0	0	0	0	0	0	0.012333	0	0	0	0	0	0	0	0	0	0	0	0	0	0	0	0	0	0	0	0	0	0	0	0	0	0	0
ZOTU726	0	0	0	0	0	0	0	0	0	0	0	0	0	0	0	0	0	0	0	1.72429e-05	0	0	0	0	0	0	0	0	0	0	0	0	0	0	0	0	0	0	0	0	0	0	0	0	0	0	7.17701e-05	0.000373341	0
ZOTU1410	0	0	0	0	0	0	0	0	0	0	0	0	0	0	0	0	0	0	0	0	0	0	0	0	0	0	0	0	0	0	0	0	0	0	0	0	0	0	0	0	0	0	0	0	0	0	0	0.00380567	0
ZOTU3271	0	0	0	0	0	0.0016024	0.0014766	0.000185816	0.00107496	0.000476751	0	0	0	0	0	0	0	0	6.33601e-05	0	0	0	0	0	0	0	0	0	0	0.000154157	0	0	0	0.000196738	0.00129908	0.000448511	0.00223572	0.00248911	8.46906e-05	0	0.000137252	0.000366267	0	0	0	0	0	0	0
ZOTU1365	0.00015745	0	0	0	0	0	4.68763e-05	0	0.000573312	0.000645017	0	0	0	0	0	0	0	0	0.000114048	0.000293129	0	0	0	0	0	0	0	0	0.000147154	0.00335292	0.000359346	0.000120506	0.00142248	0	0	0.000143524	0.000621033	0.000897712	0	0	0.00113723	0.00195724	0	8.84747e-05	0.000155524	0	0	0	0
ZOTU8608	0	0	0	0	0	8.82055e-05	0.000210943	0.000371633	7.1664e-05	0.000140221	0	0	0	0	0	0	0	0	0	0	0	0	0	0	0	0	0	0	5.88616e-05	0	4.99092e-06	0	0	4.80914e-05	0.000103101	0.000143524	8.69446e-05	0.000112214	0.000110749	0.00986449	0	0	0.000767902	0	0	0	0	0	0
ZOTU326	0	0	0	0	3.00305e-05	0	0	0	0	0	0	0	0	0	3.08799e-05	0	0	0	0	0	0.0119169	0	0	0	0	0	0	0	0	0	0	0	0	4.37195e-05	4.12405e-05	5.38213e-05	7.4524e-05	0	0	0	0	0	0	0	0	0	0	0	0
ZOTU4607	0	7.71361e-06	0	0	0	0	0	0	0	0	0	0	0	0	0	0	0	0	0	0	0	0	0.00838005	0.00375475	0	1.24278e-05	1.2306e-05	1.09304e-05	0	0	0	0	0	0	0	0	0	0	0	0	0	0	0	0	0	0	0	0	0
ZOTU934	0	0	0.00196875	0.009794	0	0	0	0	0	0	0	0	0	0	0	0	0	0	0	0	0	0	8.11234e-06	8.07474e-05	0	0	0	0	0	0	0	0	0	0	0	0	0	0	0	0	0	0	0	0	0	0	0	0	0
ZOTU589	3.63346e-05	0.0115936	0	0	0	0	0	8.57615e-05	0	0	0	0	0	0	0	0	0	0	0	0	0	0	0	0	0	0	0	0	0	0	0	0	0	0	2.06203e-05	0.000107643	7.4524e-05	0.000234629	0	0	0	0	0	0	0	0	0	0	0
ZOTU5296	0	6.17089e-05	0	0	0	1.47009e-05	5.85954e-05	0.000135789	0.000573312	0.000750182	0	0	0	0	0	0	0	0	1.2672e-05	0.0006035	0.000736468	0.000111611	0	0	0	0	0	0	4.41462e-05	0	0.00107804	0.000220928	0.00286342	2.18597e-05	6.18608e-05	3.58809e-05	6.21033e-05	0.00016322	0	5.20005e-06	5.88224e-05	0.000766871	0	2.94916e-05	0.00063028	2.26701e-05	1.79425e-05	1.20433e-05	0
ZOTU7944	0	0	0	0	0	0	0	0	0	0	0	0	0	0	0	0	0	0	0	0	0	0	0	0	0	0	0	0	0	0	0	0	0	0	0	0	0	0	0	0	0	0	0	0	0	0	3.58851e-05	0.00244478	0
ZOTU1356	0	0	0	0	0	0	0	0	0.00136162	0.00196309	0	0	0	0	0	0	0	0	0.000164736	0.000137943	0	0	0	0	0	0	0	0	2.94308e-05	0.00129107	0.0001647	4.01687e-05	0.000203211	2.62317e-05	2.06203e-05	0.000197345	7.4524e-05	0.00124456	9.77199e-05	0	0.00109802	0.0032964	0	0	0.000417458	0	0	0	0
ZOTU1434	0	0	0	0	0	0	0	0	0	7.01105e-06	0	0	0	0	0	0	0	0	0	0	0	0	0	0	0	0	0	0	0	0	0	1.00422e-05	5.54211e-05	0	0	0	0	0	0	0	0	0	0	0	0	0	0.000242224	0	0
ZOTU477	0.000145338	0.0112927	0	0	0	0	0	0	0	0	0	0	0	0	0	0	0	0.000240803	0.00012672	1.72429e-05	0	0	0	0	0	0	0	0	0	0	0	0	0	0	0	0	0	0	0	0	0	0	0	0	0	0	0	0	0
ZOTU491	0.000666134	0.00992741	0	0	0	0	0	0	0	0	0.00122779	0	0	0	0	0	0	0	0	0	0	0	0	0	0	0	0	0	0	0	0	0	0	0	0	0	0	0	0	0	0	0	0	0	0	0	0	0	0
ZOTU1461	0.000811472	0	0	0	0	0.00336651	7.03144e-05	0	0	0	0.00016852	0	0	0	0	0	0	0.00466788	0.000152064	0	0	0	0	0	0	0	0	0	0	0	0	0	0	0.00049403	0.000329924	0.000287047	0	0	0.00143974	0	0	0	0	0	0	0	0	0	0
ZOTU1320	0	0	0	1.80701e-05	0	0.00130838	5.85954e-05	0	0	0	0	0	0	0	0	0	0	0	0	0	0	0	0	0	0	0	0	0	0	0	0	0	0	0.00884882	0.000742329	0.000304987	0	0	9.12052e-05	0	0	0	0	0	0	0	0	0	0
ZOTU5155	0	0	0	0	0	0	0	0	0	7.01105e-06	0	0	0	0	0	0	0	0	0	0	0	0	0	0	0	0	0	0	0	0	0	0	0	0	0	0	0	0	0	0	0	0	0	0	0.000163709	0.000510077	0.00535585	0	0
ZOTU5031	6.05576e-05	0.000169699	0	0	0	7.35045e-05	0.000714863	0.00171523	0.000429984	0.000238376	9.62974e-05	0	0	0	0	0	0	0	0.000304129	0	0	0	0	0	0	0	0	0	0.0001913	0.000423933	0	0	0.000406421	0	4.12405e-05	0.000143524	0.00122965	0.000918114	1.30293e-05	0.00159121	0.000176467	0.000171688	0.00091874	0.00119441	1.63709e-05	0	0	0	0
ZOTU5539	6.05576e-05	0	0	0	0	0.00396925	0.00192193	9.29082e-05	0	0	0	0	0	0	0	0	0	0.00337124	0.000443521	0	0	0	0	0	0	0	0	0	0	0	0	0	0	0	0.000185582	8.97022e-05	0.000298096	0	0.00028013	0	0.000490186	0	0	0	0	0	0	0	0
ZOTU4553	0	0	0	0	0	0.000823251	0.000585954	0.000100055	0.00071664	0.000806271	0	0	0	0	0	0	3.1503e-05	0	3.80161e-05	8.62143e-05	0	0	0	0	0	0	0	0	0.000264877	0	2.99455e-05	0	0	0	0.000103101	0.000304987	0.000794922	0.000907913	0	0.00265202	0.000176467	0.000858438	0.000233113	0.00162204	0	0	0	0	0
ZOTU3071	0	0	0	0	0	0	0	0	0.000429984	0.000413652	0	0	0	0	0	0	0	0	0	0	0	0	0	0	0	0	0	0	0.00434104	0.00121399	0	0	0	0	4.12405e-05	0.000143524	2.48413e-05	0.000489661	0	0	0	0.000320483	0	0	0	0	0	0	0
ZOTU8081	0	0	0	0	0	0.00182291	1.17191e-05	0	0	0	0	0	0	0	0	0	0	0	0	0	0	0	0	0	0	0	0	0	0	0	0	0	0	0.00208542	0.00529941	0.000143524	0	0	0.00172638	0	0	0	0	0	0	0	0	0	0
ZOTU6024	0	0	0	0	0	0.00346941	0.00050392	0.000121495	7.1664e-05	0	0	0	0	0	0	0	0	0	0.000139392	0	0	0	0	0	0	0	0	0	0	0	0	0	0	0.00111047	0.00257753	0.000968784	0.000347779	0.000122415	0.00123779	0	0.000352934	5.72292e-05	0	0	0	0	0	0	0
ZOTU7851	0	0	0	0	0	0	0.000175786	0	0.00035832	0.00033653	0	0	0	0	0	0	0	0	0	0.000155186	0	0	0	0	0	0	0	0	0.000294308	0.00302534	0.000683756	0	0.00121926	0	0	0.000107643	0.000322937	0.000438655	0	0	0.00176467	0.00191145	0	0	4.91127e-05	4.53402e-05	0	0	0
ZOTU6195	0	0	0	0	0	0	0	0	0	0	0	0	0	0	0	0	0	0	0	0	0	0	0	0	0	0	0	0	0	0	0	0	0	0	0	0	0	0	0	0	0	0	0	0	0	0	0.000269138	0.00213166	0
ZOTU870	0	0	0	0	0	0.00413096	0.00131254	0	0	0	0	0	0	0	0	0	0	0	8.87042e-05	0	0	0	0	0	0	0	0	0	0	0	0	0	0	0.000319152	0.00377351	0.000125583	0	0	0.000553746	0	0.000647046	0	0	0	0	0	0	0	0
ZOTU893	0.00647966	4.62817e-05	0	0	0	0	0	0	0	0	0	0	0	0	0	0	0	0.00409365	0.000291457	0	0	0	1.62247e-05	0	0	0	0	0	0	0	0	0	0	0	0	0	0	0	6.51466e-06	0	0	0	0	0	0	0	0	0	0
ZOTU5688	0	0	0	0	0	0	0	0	0.00035832	0.000981547	0	1.24333e-05	0	0	0	0	0	0	0	0	0	0	0	0	0	0	0	0	0.00122138	0.00512573	0.000773592	0.000160675	0	0	0.000144342	0.000753498	0.00018631	0.000969121	0	0	0	0.000183133	0	0	0	0	0	0	0
ZOTU5993	0.00221641	0	0	0	0	2.94018e-05	4.68763e-05	0	0	0	0	0	0	0	0	0	0	0.00816878	0.00025344	0	0	0	2.4337e-05	0	0	0	0	0	0	0	0	0	0	0	4.12405e-05	5.38213e-05	0	0	0	0	0	0	0	0	0	0	0	0	0
ZOTU693	0.00967711	0.00115704	0	0	0	0	0	0	0	0	0	0	0	0	0	0	0	0	0	0	0	0	0	0	0	0	0	0	0	0	0	0	0	0	0	0	0	0	0	0	0	0	0	0	0	0	0	0	0
ZOTU5715	0	0	0	0	0	0.000690943	4.68763e-05	0	0	0	0	0	0	0	0	0	0	0	0	0	0	0	0	0	0	0	0	0	0	0	0	0	0	0.00262317	0.00416529	0.00147112	0	0	0.00183062	0	0	0	0	0	0	0	0	0	0
ZOTU3412	0.00606787	0	0	0	0	0	0.000105472	0	0	0	0	0	0	0	0	0	0	0.00435298	7.60321e-05	0	0	0	8.92357e-05	0	0	0	0	0	0	0	0	0	0	0	8.2481e-05	5.38213e-05	0	0	0	0	0	0	0	0	0	0	0	0	0
ZOTU8248	0.00141705	0.00055538	0	0	0	0.000764447	0.000960964	0.000814734	0.000143328	0	0	0	0	0	0	0	0	0.00157448	0.00100109	0	0	0	2.4337e-05	0	0	0	0	0	0	0.000366124	0	0	0	0.000113671	0.000268063	0.000287047	0.00139111	0.000744693	3.90879e-05	0	0.000313719	4.57834e-05	0	0	0	0	0	0	0
ZOTU1006	0	0	0	0	0.0022673	0	0	0	0	0	2.40743e-05	1.24333e-05	5.92796e-06	0	0	1.43497e-05	0	0	0	0	0	7.44075e-05	0	0	1.11838e-05	0.000161561	0.00148903	0.00675498	0	0	0	0	0	0	0	0	0	0	0	0	0	0	0	0	0	0	0	0	0
ZOTU7283	0.00128382	0	0	0	0	0.000279317	4.68763e-05	0	0	0	0	0	0	0	0	0	0	0.00839106	0.000139392	0	0	0	0	0	0	0	0	0	0	0	0	0	0	0	0.000412405	7.17618e-05	2.48413e-05	8.16102e-05	6.51466e-05	0	0	0	0	0	0	0	0	0	0
ZOTU745	0	0	0	0	0	0	0	0	0	0	0.00016852	0	0	0	0	0	0	0	0	0	0	0	0.0103757	0.000161495	1.11838e-05	0	0	0	0	0	0	0	0	0	0	0	0	0	0	0	0	0	0	0	0	0	0	0	0
ZOTU1188	0	7.71361e-06	0	0	0	0	3.51572e-05	0.000278725	0.00157661	0.00417859	0	0	0	0	0	0	0	0	0	5.17286e-05	0.000509102	0	0	0	0	0	0	0	0.000397316	0.00125253	0.000344373	0.000120506	0	2.18597e-05	0	0.000179404	0.000707978	0.000846705	1.30293e-05	0	0	0.000194579	0	0	0	0	0	0	0
ZOTU9136	0.00015745	0	0	0	0	0.000294018	0.00132425	0.000793293	0.000214992	0.000217343	4.81487e-05	0	0	0	0	0	3.1503e-05	0.00011114	0.00130522	0.000327614	0	0	0	0	0	0	0	0	0	0.000173427	0	0	0	0.00013553	0.00105163	0.00104055	0.00172647	0.000367246	0.00019544	0	0	0.000148796	0.00102844	0	0	0	0	0	0
ZOTU6006	0	0	0	0	0	0.00195522	0.00076174	0.0014508	7.1664e-05	0.00013321	0	0	0	0	0	0	0	0	0.000139392	0	0	0	0	0	0	0	0	0	4.41462e-05	0	4.99092e-06	5.02109e-05	9.23685e-05	0.000419707	0.00171148	0.00111231	0.00115512	0.000326441	0.000618893	0	0.000627439	0	0	0	0	0	0	0	0
ZOTU2188	0	7.71361e-06	0	0	0	0	0.000316415	0.000343046	0.000859968	0.00053284	0	0	0	0	0	0	0	0	0.000101376	0.00617295	2.96564e-05	0	0	0	0	0	0	0	0.00054447	5.7809e-05	0.000189655	0.000120506	3.69474e-05	0	2.06203e-05	0.000161464	0.000670716	0.000214227	6.51466e-06	0	0	0.000171688	0	0	0	0	0	0	0
ZOTU2246	0	0	0	0	0	0	0	0	0	0	0	0	0	0	0	0	0	0	0	0	0	0	0.00320437	0.00730764	0	1.24278e-05	0	1.09304e-05	0	0	0	0	0	0	0	0	0	0	0	0	0	0	0	0	0	0	0	0	0
ZOTU731	0.0103796	3.08544e-05	0	0	0	0	0	0	0	0	0	0	0	0	0	0	0	5.557e-05	6.33601e-05	0	0	0	0	0	0	0	0	0	0	0	0	0	0	0	0	0	0	0	0	0	0	0	0	0	0	0	0	0	0
ZOTU7925	0	0	0	0	0	0	0	0	0	0	0	0	0	1.67777e-05	0	0	0	0	0	0	0	0	0	0	0	0	0	0	0	0	0	0	0	0	0	0	0	0	0	0	0	0	0	0	0	0	0.000179425	0.00298673	0
ZOTU2493	0	0	0	0	0	7.35045e-05	0	0	0	0	0	0	0	0	0	0	0	0	0	0	0	0	0	0	0	0	0	0	0	0	0	0	0	0.000607701	0.00981524	0	0	0	0	0	0	0	0	0	0	0	0	0	0
ZOTU757	0	0	1.37675e-05	0	0	0	0	0	0	0	0	0	0	0	0	0	0	0	0	0	0	0	0	4.03737e-05	0.00199072	0.00171503	0.00420866	0.00242655	0	0	0	0	0	0	0	0	0	0	0	0	0	0	0	0	0	0	0	0	0
ZOTU5897	0	0	0	0	0	0.00105847	0.000714863	8.57615e-05	0	4.20663e-05	0	0	0	0	0	0	0	0.00200052	0.000291457	0	0	0	0	0	0	0	0	0	0	9.63484e-05	0.000294464	0	0	0.000786951	0.00181458	0.00143524	0.000298096	0.000377447	0.000495114	0	0.00015686	0	0.000329101	0	7.3669e-05	0	0	0	0
ZOTU7631	0	4.62817e-05	0	0	0	0.000132308	0.000210943	0.000414514	0.00121829	0.000694094	0	0	0	0	0	0	0	0	3.80161e-05	0.0002414	0	0	0	0	0	0	0	0	0.000176585	1.92697e-05	0.00103312	0.00112472	0.000369474	4.80914e-05	0	0.000179404	0.000173889	0.000234629	1.30293e-05	8.32007e-05	0.000784298	0.0017741	0.000123413	0.00116492	0	0	0	0	0
ZOTU3258	0	0	0	0	0	0.0015583	0.000316415	0.000328752	0.000501648	6.30994e-05	0	0	0	0	0	0	0	0	2.5344e-05	8.62143e-05	0	0	0	0	0	0	0	0	0	0	0	0	0	0.000249201	0.000639228	0.00039469	0.00135385	0.00146898	0.000957655	0.00200202	0	0.000354821	0	0	0	0	0	0	0
ZOTU1064	1.21115e-05	0	0	0	0	0	0	0	0	0	0	0	0	0	0	0	0	0.0102804	0	0	0	0	0	0	0	0	0	0	0	0	0	0	0	0	0	0	0	0	0	0	0	0	0	0	0	0	0	0	0
ZOTU6096	0	0	0	0	0	0.000837952	9.37526e-05	0.00183672	0.000573312	0.000595939	0	0	0	0	0	0	0	0	0	0	0	0	0	0	0	0	0	0	0.000323739	0.00321804	8.48456e-05	5.02109e-05	0	7.43231e-05	0.000639228	0.000143524	0.000322937	0.000183623	0.000631922	0	0.000647046	0	0	0	0	0	0	0	0
ZOTU9302	0	0	0	0	0	8.82055e-05	0.001043	0.000664651	0.000644976	0.000462729	0	0	0	0	0	0	0	0	0	0	0	0	0	0	0	0	0	0	0.000235446	0.000211966	0	0	0	0	0	0.00130965	0.000869446	0.00039785	0	0	0.000392149	0.000766871	0.00135754	0.00168102	0	0	0	0	0
ZOTU5899	0	0	0	0	0	0.00191112	0.00248444	0.000693238	0.000143328	0	0	0	0	0	0	0	0	0.00105583	3.80161e-05	0	0	0	0	0	0	0	0	0	0	0	0	0	0	0.000100555	0.00129908	0.00114819	0.000335358	0.000326441	5.86319e-05	0	0.000431364	0.000103013	0	0	0	0	0	0	0
ZOTU1138	0	0	0	0	0	0	0	0	0	0	0	0	0	0	0	0	0	0	0	0	0	0	0	0	0	0	0	0	0.000117723	0.000366124	0.000688746	0.00418759	0.00469232	0	2.06203e-05	3.58809e-05	0	0	0	0	0	0	0	0	0	0	0	0	0
ZOTU5550	0.00868396	0	0	0	0	0	0	0	0	0	0	0	0	0	0	0	0	0.000740933	0.000430849	0	0	0	0	0	0	0	0	0	0	0	0	0	0	0	6.18608e-05	7.17618e-05	0	0	0.000117264	0	0	0	0	0	0	0	0	0	0
ZOTU8498	0	0	0	0	0	0.000676242	5.85954e-05	6.43211e-05	0	0	0	0	0	0	0	0	0	0.00022228	5.06881e-05	3.44857e-05	0	0	0	0	0	0	0	0	0	0	0	0	0	0.000205482	0.000536127	8.97022e-05	3.7262e-05	0	0.000403909	0.00705646	0.000627439	0	0	0	0	0	0	0	0
ZOTU1403	9.68922e-05	0	0.00316652	0.000704734	0	0	0	0	0	0	0.000505561	0.000721133	0	0	0	0	0	3.70466e-05	0	6.89715e-05	0	0	0.0011195	0.00185719	0.00163284	0.000136705	1.2306e-05	0	0	0	0	0	0	0	0	0	0	0	0	0	0	0	0	0	0	0	0	0	0
ZOTU816	0	0	0	0	0	0	0	0	0	0	0	0	0	0	0	0	0	0	0	0	0	0	0	0	0	0	0	0	0	0	0	0	0	0	0	0	0	0	0	0	0	0	0	0	0	0	0	7.22596e-05	0
ZOTU6214	0	0	0	0	0	0	0	0	0	0	0	0	0	0	0	0	0	0	0	0	0	0	0	0	0	0	0	0	0	0	0	0	0	0	0	0	0	0	0	0	0	0	0	0	0	0	0	0.000686466	0
ZOTU4408	0.00340334	0.000779075	0	0	0	0.000220514	3.51572e-05	0	0	0	0	0	0	0	0	0	0	0.00451969	0.000114048	0	0	0	2.4337e-05	0	0	0	0	0	0	0	0	0	0	0	4.12405e-05	1.79404e-05	1.24207e-05	2.04025e-05	5.86319e-05	0	0.000568616	0	0	0	0	0	0	0	0
ZOTU439	0	0	0	0	0	0	0.000117191	0.00020011	0	0	0	0	0	0	0	0	0	0	2.5344e-05	0	0	0	0	0	0	0	0	0	0	0	0	0	0	0	0	7.17618e-05	1.24207e-05	0	0	0.00938608	0	0	0	0	0	0	0	0	0
ZOTU5814	0.000205896	0	0	0	0	0.00371933	0.000152348	3.57339e-05	0	0	0	0	0	0	0	0	0	0.000574223	0	0	0	0	0	0	0	0	0	0	0	0	0	0	0	0.000843786	0.00185582	0.000645856	0.00018631	4.08051e-05	0.00149837	0	0	2.28917e-05	0	0	0	0	0	0	0
ZOTU4462	0	0	0	0	0	0.000235215	0.00132425	0.000514569	0.000573312	0.000357564	0	0	0	0	0	0	0	1.85233e-05	3.80161e-05	0	0	0	0	0	0	0	0	0	0.000441462	0.000250506	0	0	0	2.18597e-05	0.00076295	0.00143524	0.00100607	0.000703888	3.25733e-05	0.000228802	0.00125488	0.000251808	0.0001097	0.000117966	6.54836e-05	0	0	0	0
ZOTU494	0	3.08544e-05	0	0	0	0	0	0	0	0	0	0	0	0	0	0	0	0	0	0	0	0	0.000551639	0.0085673	0.000346698	1.24278e-05	0.000159978	0	0	0	0	0	0	0	0	0	0	0	0	0	0	0	0	0	0	0	0	0	0
ZOTU5876	0.000339123	0	0	0	0	0.0016024	0.000679706	0.000185816	0.000286656	0.000280442	0	0	0	0	0	0	0	0.00050013	0.000278784	0	0	0	0	0	0	0	0	0	7.3577e-05	5.7809e-05	4.99092e-06	0	0	0.000288549	0.00171148	0.000914962	0.000459565	0.000673284	0.000456026	0	0.000529401	0	0	0.000324407	0	0	0	0	0
ZOTU849	0	0	0	0	0	0.00923217	0.000210943	0	0	0	0	0	0	0	0	0	0	0	0	0	0	0	0	0	0	0	0	0	0	0	0	0	0	0.000166134	0	0	0	0	3.25733e-05	0	0	0	0	0	0	0	0	0	0
ZOTU794	0.000133227	0.00064023	0	0	0	0.000102906	0.000445325	0	0	3.50552e-05	0.000529636	0	0	0	0	0	0	0	0.000177408	0	0	0	0	0	0	0	0	0	0	0	0	0	0	0.000170506	0.000989772	0.000753498	0.000198731	0.000224428	0.000416938	0.00422244	0.000549009	0	0	0	0	0	0	0	0
ZOTU2457	0.000375457	0	0	0	0	8.82055e-05	0	0	0	0	0	0	0	0	0	0	0	0.00305635	0	0	0	0	0	0	0	0	0	0	0	0	0	0	0	0	0.000164962	5.38213e-05	0	0	3.90879e-05	0.00577725	0	0	0	0	0	0	0	0	0
ZOTU7762	0	0	0	0	0	0.00304309	0.00087893	0.00017867	0	7.01105e-06	0	0	0	0	0	0	0	0	0	0	0	0	0	0	0	0	0	0	0.000161869	0.000134888	0	0	0	3.49756e-05	0.00082481	0.00224255	4.96827e-05	0.000173422	0.000162866	0	0.00023529	0	0.00126155	0	4.09272e-05	0	0	0	0
ZOTU1604	0	0	0	0	0	0	0	0	0	0	0	0	0	0	0	0	0	0	0	0	0	0	0	0	0	0	0	0	0	0	0	0	0	0	0	0	0	0	0	0	0	0	0	0	0	0	0.000744615	0.00151745	0
ZOTU3806	3.63346e-05	0	0	0	0	0.00388104	0.000843773	0.000300165	0.000143328	0	0	0	0	0	0	0	0	0.00044456	0	0	0	0	0	0	0	0	0	0	0	0	0	0	0	0.000240457	0.000948532	0.000448511	0.000235993	8.16102e-05	0.00111401	0	0.000294112	4.57834e-05	0	0.000442373	0	0	0	0	0
ZOTU915	0	0	0	0	0	0	0	0	0.000931633	0.0017738	0	0	0	0	0	0	0	0	0	0	0	0	0	0	0	0	0	0	0.000647478	0.00431641	0.000154718	0	9.23685e-05	0	0	1.79404e-05	9.93653e-05	0.00109154	0	0	0	0.000320483	0	0	0	0	0	0	0
ZOTU4290	0	0	0	0	0	0.00147009	0.000796897	0.000929082	0.000143328	7.01105e-05	0	0	0	0	0	0	0	0	0	0	0	0	0	0	0	0	0	0	1.47154e-05	0	7.48637e-05	3.01265e-05	0	0.000507146	0.00243319	0.00113025	0.000906708	0.000193824	0.000254072	0	0	0.000446388	0	0	0	0	0	0	0
ZOTU4324	0	0	0	0	0	0.00108787	9.37526e-05	0	0	1.40221e-05	0	0	0	0	0	0	0	0.000203757	0.000380161	0	0	0	0	0	0	0	0	0	0	0	0	0	0	0.000393475	0.00204141	0.000520273	3.7262e-05	4.08051e-05	0.00156352	0.00277682	0	0.000103013	0	0.000132712	0	0	0	0	0
ZOTU838	0	0	0	0	0	0.00177881	0.000187505	0	0	0	0	0	0	0	0	0	0	0	0	0	0	0	0	0	0	0	0	0	0	0	0	0	0	0.000904993	0.00484576	0.00157876	0	0	0	0	0	0	0	0	0	0	0	0	0
ZOTU5613	2.4223e-05	0	0.000206512	1.80701e-05	0	0	0	0	0	0	0.000674082	0.00341916	0.00032011	0.00125833	0.00160576	0	0.000819078	0	0	0	7.41411e-05	0.00068827	2.4337e-05	0.000145345	0	0	0	0	0	0	0	0	0	0	0	0	0	0	0	0	0	0	0	0	0	0	0	0	0
ZOTU2259	0	0	0	0	0	0.000455728	0.000468763	0.00357339	0.000286656	0.000119188	0	0	0	0	0	0	0	0	0	0	0	0	0	0	0	0	0	0	0.0011478	0.000250506	0	0	0	0.000249201	0.000701089	0.000556154	0.000509247	0.000918114	0	0	0	0	0	0	0	0	0	0	0
ZOTU7913	0	0	0	0	0	4.41027e-05	0.000480482	0.000150083	0.000286656	0.000371586	0	0	0	0	0	0	0	0	0	0	0	0	0	0	0	0	0	0	0	0.000192697	0	0	0	0	0	0.000340868	0.000869446	0.00117315	5.21173e-05	0	0.00023529	0.00264399	0	0.00230034	4.91127e-05	3.40051e-05	0	0	0
ZOTU951	0	0	0	0	0	0	0.000515639	2.85872e-05	0.00071664	0.000841326	0	0	0	0	0	0	0	0	8.87042e-05	0	0	0	0	0	0	0	0	0	7.3577e-05	0.000423933	9.98183e-06	0	0	0.000196738	0	0.00039469	0.000670716	0.000938517	0	0	0.000431364	0.00388014	0	0	0	0	0	0	0
ZOTU4746	0.000375457	0	0	0	0	5.88036e-05	0	6.43211e-05	0	0	0	0	0	0	0	0	0	0.00790946	0.000101376	0	0	0	0	0	0	0	0	0	0	0	0	0	0	0	0.000474266	0.000161464	0	0	0	0	0	0	0	0	0	0	0	0	0
ZOTU7957	0	0.00282318	0	0	0	0	0.000175786	0.000150083	0	1.40221e-05	0	0	0	0	0	0	0	0	0.000266112	0.00251746	0	0	8.11234e-06	4.03737e-05	0	0	0	0	8.82924e-05	0	5.9891e-05	0.00014059	0	0	0	0.000179404	4.96827e-05	6.12076e-05	0	0	0	0	0.00196089	0.000604577	0	0	0	0	0
ZOTU5668	0	7.71361e-06	0	0	0	0	0	0	0	0	0	0	0	0	0	0	0	0	0	0	0	0	0.00875321	0.000355289	0	0	0	0	0	0	0	0	0	0	0	0	0	0	0	0	0	0	1.37125e-05	0	0	0	0	0	0
ZOTU4260	0	0	0	0	0	0	0	0	0	0	0	0	0	0	0	0	0	0	0	0	0	0	0.00812045	0.000363363	5.5919e-05	0	0	0	0	0	0	0	0	0	0	0	0	0	0	0	0	0	0.000521076	0	0	0	0	0	0
ZOTU3051	8.47807e-05	7.71361e-06	0	0	0	0	0	0	0	0	0.000216669	0	0	0	0	0	0	0	0	0	0	0	0.000170359	0.00493367	0.00121903	0.00120549	0.000270733	0.000896292	0	0	0	0	0	0	0	0	0	0	0	0	0	0	0	0	0	0	0	0	0
ZOTU6288	0.00460238	0.000431962	0	0	0	0	2.34381e-05	2.85872e-05	0.000143328	0	0	0	0	0	0	0	0	0.00296373	0.000430849	0	0	0	9.73481e-05	6.45979e-05	0	0	0	0	0	0	0	0	0	0	2.06203e-05	0.000125583	4.96827e-05	0	0	0	0	0	0	0	0	0	0	0	0
ZOTU9373	0	0	0	0	0	0.000396925	5.85954e-05	0	0	0	0	0	0	0	0	0	0	0	0	0	0	0	0	0	0	0	0	0	0	0	0	0	0	0.00142963	0.000123722	0.000609975	0	0	0.00635831	0	0	0	0	0	0	0	0	0	0
ZOTU931	0	0	0	0	0	0	0	0	0	0	0	0	0	0	0	0	0	0	0	0	0	0	0	0	0	0	0	0	0	0	2.99455e-05	0	3.69474e-05	0	0	0	0	0	0	0	0	0	0	0	0	0.00720909	0	0	0
ZOTU6290	0.000218007	0.000516812	0	0	0	0.000499831	0.00012891	3.57339e-05	0.00035832	0.000504796	0	0	0	0	0	0	0	0	0.000950402	0.000189672	0	0	0	0	0	0	0	0	0.000279593	0.000115618	0.000499092	0.000843543	0	0.000257945	0.00134032	0.000950843	0.000347779	0.000540667	0	0	0	0.000286146	0	0	0	0	0	0	0
ZOTU1995	0.0019984	0.000316258	0	0	0	0	0	0	0	0	0	0	0	0	0	0	0	0.00648316	3.80161e-05	0	0	0	0	8.07474e-06	0	0	0	0	0	0	0	0	0	0	0	0	0	0	0	0	0	0	0	0	0	0	0	0	0
ZOTU588	0	0.000709652	0.000784746	9.03506e-05	0	0	0	0	0	0	0	0	0	0	0	0	0	0	0	0	0	0	0.00580032	0.00130003	6.71028e-05	2.48555e-05	0	0	0	0	0	0	0	0	0	0	0	0	0	0	0	0	0	0	0	0	0	0	0
ZOTU6520	0.00276143	0	0	0	0	2.94018e-05	0	0	0	0	0	0	0	0	0	0	0	0.00494573	0.000114048	0	0	0	8.11234e-06	0	0	0	0	0	0	0	0	0	0	6.12073e-05	0.000226823	5.38213e-05	0	0	0.000338762	0	0.000215682	0	0	0	0	0	0	0	0
ZOTU4330	9.68922e-05	0	0	0	0	0.000455728	0	0	0	7.01105e-06	0	0	0	0	0	0	0	0	0	0	0	0	0	0	0	0	0	0	0	0	0	0	0	0.00401345	0.00216513	0.000287047	1.24207e-05	0	0.000221498	0	0.00149017	0	0	0	0	0	0	0	0
ZOTU4672	0.000266454	0	0	0	0	0.000499831	9.37526e-05	0	0	0	0	0	0	0	0	0	0	0.00661283	0.000114048	0	0	0	0	0	0	0	0	0	0	0	0	0	0	0.000139902	0.000515506	0.000107643	1.24207e-05	0	0.000319218	0	0	0	0	0	0	0	0	0	0
ZOTU1307	0.000169561	0.000848497	0	0	0	0	0.00037501	0.000543156	0.000143328	2.80442e-05	0	0	0	0	0	0	0	0	0.000468865	0.000534529	0	0	3.24494e-05	0	0	0	0	0	2.94308e-05	0	2.99455e-05	0	0	0	0	0.000161464	0.00129175	8.16102e-05	0	0	0	0	0.00392178	0	0	0	0	0	0
ZOTU1392	0.00015745	0.000501385	0	0	0	0	0.000164067	0.00112919	0.000501648	0.000308486	0	0	0	0	0	0	0	1.85233e-05	0.00025344	0.000896629	0.00041519	0.000372038	8.11234e-06	0	0	0	0	0	0.000103008	3.85394e-05	0.000189655	0.000100422	0.000203211	8.7439e-06	4.12405e-05	0.000269107	0.00185068	0.000836504	6.51466e-06	3.64003e-05	0	0.000171688	1.37125e-05	0	2.45563e-05	0	0	0	0
ZOTU9139	0	0	0	0	0	0	0	0	0	0	0	0	0	0	0	0	0	0	0	0	0	0	0	0	0	0	0	0	0	0	0	0	0	0	0	0	0	0	0	0	0	0	0	0	0	0	0	0.000433557	0
ZOTU9287	0	0	0	0	0	0	0.000175786	0.000428807	0	0	0	0	0	0	0	0	0	0	0.000304129	0	0	0	0	0	0	0	0	0	0	0	0	0	0	0.000244829	0.000989772	0.000251166	3.7262e-05	2.04025e-05	3.90879e-05	0.00534565	0.000686261	6.8675e-05	0	0	0	0	0	0	0
ZOTU8295	0	0	0	0	0	0	0	0	7.1664e-05	0.000673061	0	0	0	0	0	0	0	0	0	0.000379343	0	0	0	0	0	0	0	0	4.41462e-05	0	5.49001e-05	0.000261097	0	6.55792e-05	6.18608e-05	0.000215285	7.4524e-05	0.000693686	0	0	0.00190192	0.00230061	0.00123413	0.000412882	0.000114596	0	0	0	0
ZOTU1415	0.00429959	0	0	0	0	0	1.17191e-05	0	0	0	0.000770379	0	0	0	0	0	0	0.00314896	0.000316801	0	0	0	0	0	0	0	0	0	0	0	0	0	0	0	0	0	0	0	0	0	0	0	0	0	0	0	0	0	0
ZOTU1309	0	0	0	0	0	0	0	0	0	3.50552e-05	0	0	0	0	0	0	0	0	0	0	0	0	0	0	0	0	0	0	0.00423804	5.7809e-05	0.000129764	0	5.54211e-05	0	0	0.000143524	0	0	0	0	0	0.000103013	0	0	2.45563e-05	0	0	0	0
ZOTU4259	0.00202262	0.000547666	0	0	0	0.000661541	0.000703144	0	0	0	0	0	0	0	0	0	0	0.00200052	0	0	0	0	0	0	0	0	0	0	0	0	0	0	0	0.000236085	0.000185582	0.000466451	0	0	0.00160261	0	0	0	0	0	0	0	0	0	0
ZOTU5525	0.00106581	0	0	0	0	0.000176411	1.17191e-05	0	0	0	0	0	0	0	0	0	0	0.00698329	1.2672e-05	0	0	0	4.8674e-05	1.61495e-05	0	0	0	0	0	0	0	0	0	0	0	7.17618e-05	0	0	6.51466e-06	0	0	0	0	0	0	0	0	0	0
ZOTU1475	0	0	0.000468094	0.000939646	0	0	0	0	0	0	0.000385189	0	0	0	0	0	0	0	0	0.0001207	0.00286185	0	0.00101404	0.00244665	5.5919e-05	7.45666e-05	1.2306e-05	0	0	0	0	0	0	0	0	0	0	0	0	0	0	0	0	0	0	0	0	0	0
ZOTU890	0	0	0	0	0	0	0	0	0	0	0	0	0	0	0	0	0	0	8.87042e-05	0.00696612	0.0011912	1.86019e-05	0	0	0	0	0	0	0	0	0	0	0	0	0	0	0	0	0	0	0	0	0	0	0	0	0	0	0
ZOTU6282	0	0	0	0	0	0.00227864	0.000222662	0.000114349	0.000286656	0	0	0	0	0	0	0	0	0	0	0	0	0	0	0	0	0	0	0	0	0	0	0	0	0.00161762	0.00136094	0.00082526	3.7262e-05	3.06038e-05	0.00134202	0	0	0.00013735	0	0	0	0	0	0	0
ZOTU857	0.00736381	0.000856211	0	0	0	0	0	0	0	0	0	0	0	0	0	0	0	0	0	0	0	0	0	0	0	0	0	0	0	0	0	0	0	0	0	0	0	0	0	0	0	0	0	0	0	0	0	0	0
ZOTU1453	0.00564397	0.000269976	1.37675e-05	0	0	0	8.20335e-05	0	0	0	0	0	0	0	0	0	0	0.00201904	0.000177408	0	0	0	0	8.07474e-06	0	0	0	0	0	0	0	0	0	0	0	0	0	0	0	0	0	0	0	0	0	0	0	0	0
ZOTU5946	0.00359712	0.00066337	0	0	0	0.000705644	0	0.000278725	0	0	0	0	0	0	0	0	0	0.00164858	8.87042e-05	0	0	0	0.000332606	4.84484e-05	0	0	0	0	0	0	0	0	0	9.18109e-05	0.000268063	1.79404e-05	0	0	0.000456026	0	0	0	0	0	0	0	0	0	0
ZOTU7835	0	0	0	0	0	0	2.34381e-05	0	0.000286656	0.000560884	0	0	0	0	0	0	0	0	0	0	0	0	0	0	0	0	0	0	0	0	0	0	0.00598548	0	0	8.97022e-05	0	0.000377447	0	0	0	0.0002747	0.000589639	0	0	0	0	0	0
ZOTU1838	0.000254342	0	0	0	0	0.00174941	0.00012891	0	0	0	0	0	0	0	0	0	0	0.00168562	6.33601e-05	0	0	0	0	0	0	0	0	0	0	0	0	0	0	0.000445939	0.00268063	0.000627915	0	0	0.000397394	0	0.000137252	0	0	0	0	0	0	0	0
ZOTU1939	0	0	0	0	0	0	0	0	0	7.01105e-05	0	0	0	0	0	0	0	0	0	0	0	0	0	0	0	0	0	0	0.000794632	0.000462472	0.00102314	0.000371561	0.001404	0	0	1.79404e-05	0	0	0	0	0	0	0	0	0.00104774	0.000351386	0	0	0
ZOTU8212	9.68922e-05	0.00154272	1.37675e-05	0	0	0	2.34381e-05	0	0	0.000645017	0	0	0	0	0	0	0	0	0	5.17286e-05	0	0	0	0	0	0	0	0	0.000176585	0.000674439	0.000349364	0.000301265	0.000683527	3.49756e-05	0	0.000233226	0.000546509	0.00064268	6.51466e-05	0	0.000352934	0.00103013	0	1.47458e-05	0.000122782	1.1335e-05	0	0	0
ZOTU9651	0	0	0	0	0	0	5.85954e-05	7.86147e-05	0.000501648	0.00135313	0	0	0	0	0	0	0	0	0	0.000189672	0	0	0	0	0	0	0	0	0.000382601	0.000886405	0.000968238	0.000120506	0.00084979	3.06036e-05	2.06203e-05	0.000269107	0.00037262	0.000652881	0	0	0	0.000423496	0	0.000176949	0.000679392	0	0	0	0
ZOTU653	2.4223e-05	0.00747449	0	0	0	0	0	0	0	0	0	0	0	0	0	0	0	0	0	0	0	0	0.000494853	5.65232e-05	0	0	0	0	0	0	0	0	0	0	0	0	0	0	0	0	0	0	0	0	0	0	0	0	0
ZOTU5402	0.000109004	0	0	0	0	0.0015877	1.17191e-05	0	0	0	0	0	0	0	0	0	0	0.000185233	0.000430849	0	0	0	0	0	0	0	0	0	0	0	0	0	0	0.000118043	0.000144342	3.58809e-05	0	1.02013e-05	0.000136808	0.00526765	0	0	0	0	0	0	0	0	0
ZOTU7019	0	1.54272e-05	0	0	0	2.94018e-05	1.17191e-05	7.14679e-06	0.000429984	0.000357564	0	0	0	0	0	0	0	0	0.000139392	1.72429e-05	0	0	0	0	0	0	0	0	0	0.000770787	5.9891e-05	0	0	0	0	1.79404e-05	0.000471985	0.000489661	0	0	0.000745083	0.00304459	0	0.00134187	7.3669e-05	0	0	0	0
ZOTU5254	0.000750914	0	0	0	0	0	0	0	0	0	0	0	0	0	0	0	0	0.00726114	0	0	0	0	8.11234e-06	8.07474e-06	0	0	0	0	0	0	0	0	0	0	0	0	0	0	0	0	0	0	0	0	0	0	0	0	0
ZOTU3451	0	0	0	0	0	0.00133778	0.000199224	5.00275e-05	0.000573312	3.50552e-05	0	0	0	0	0	1.43497e-05	0	0	2.5344e-05	0	0	0	0	0	0	0	0	0	0	0	0	0	0	0.000196738	0.000474266	0.000143524	0.000496827	0.000346843	0.000775244	0.00257922	0	0.000755425	0	0	0	0	0	0	0
ZOTU6333	0.000375457	0	0	0	0	0.00305779	0.000609392	0	0	1.40221e-05	0	0	0	0	0	0	0	0	0.000177408	0	0	0	0	0	0	0	0	0	0	1.92697e-05	0	0	0	0.000974944	0.000597987	0.000340868	0.000136627	2.04025e-05	0.00163518	4.16004e-05	0	0	0	0	0	0	0	0	0
ZOTU780	0	0	0	0	0	0	0	0	0	0	0	0	0	0	0	0	0	0	0	0	0	0	0	0	0	0	0	0	0	0	0	0	0	0	0	0	0	0	0	0	0	0	0	0	0	0	0.000592103	0.00487752	0
ZOTU2333	0	0	0	0	0	7.35045e-05	0.00249616	0.00265146	0.000143328	0	0	0	0	0	0	0	0	0	0.000266112	0	0	0	0	0	0	0	0	0	0	0	0	0	0	0	0.000309304	0.000107643	0.00157742	0.000336642	0	0	0	0	0	0	0	0	0	0	0
ZOTU1402	0.000230119	0	0	0	0	0.000676242	0.00137113	0.000142936	7.1664e-05	2.80442e-05	0	0	0	0	0	0	0	0.000203757	0.000152064	0	0	0	0	0	0	0	0	0	0	0	0	0	0	0.000319152	0.00101039	0.00134553	0.000149048	0	0.000306189	0	0.00196075	0	0	0	0	0	0	0	0
ZOTU1131	0	0	0	0	0	0	0	0	0	0	0	0	0	0	0	0	0	0	0	0	0	0	0	0	0	0	0	0	4.41462e-05	0	0	0	0.000110842	0	0	0	0	1.02013e-05	0	0	0	0	0	0	0	0	0.00014354	0.000132476	0
ZOTU5830	0	0.000231408	0	0	0	7.35045e-05	0	0	0	0	0	0	0	0	0	0	0	0	6.33601e-05	0	0	0	0	0	0	0	0	0	0	0	0	0	0	0.000100555	0.000701089	0.000645856	0	0	0	0.00609965	0	0	0	0	0	0	0	0	0
ZOTU6534	0.00198629	0	0	0	0	0.00048513	3.51572e-05	0	0	0	0	0	0	0	0	0	0	0.00464935	3.80161e-05	0	0	0	0	0	0	0	0	0	0	0	0	0	0	6.99512e-05	0.000391785	0	3.7262e-05	0	0.000156352	0	0	5.72292e-05	0	0	0	0	0	0	0
ZOTU8415	0	0	0	0	0	0	0	0	7.1664e-05	0.000147232	0	0	0	0	0	0	0	0	0	1.72429e-05	0	0	0	0	0	0	0	0	0	0	8.98365e-05	1.00422e-05	0	0	0	0	0	4.08051e-05	0	0	0	9.15667e-05	0	0	0.000900399	4.53402e-05	0	0	0
ZOTU466	0	0	0	0	0	0	0	0	0	0	0	0	0	0	0	0	0	0	0	0	0	0	0	0	0	0	0	0	0	0	0	0	0	0	0	0	2.48413e-05	0	0	0.00785727	0	0	0	0	0	0	0	0	0
ZOTU3023	0	0	0	0	0	0	0	0	0	0	0	0	0	0	0	0	0	0	0	0	0	0	0	0	0	0	0	0	0	0	0	0	0	0	0	0	0	0	0.000345277	0.00699926	0.000470579	0	0	0	0	0	0	0	0
ZOTU1065	0	0	0.000385489	0.00133719	0	0	0	0	0	0	0.000361115	0	0	0	0	0	0	0	0	0	0	0	0.000178471	8.88221e-05	0	0	0	0	0	0	0	0	0	0	0	0	0	0	0	0	0	0	0	0	0	0	0	3.61298e-05	0
ZOTU4445	0	0.000740506	0	0	0	0.000690943	0.000703144	0.000814734	0.000143328	7.01105e-05	0.000577784	0	0	0	0	0	0	0	0.000570241	0.000396586	0	0	0	0	0	0	0	0	0	0	0	0	0	1.74878e-05	0.000721709	0.000125583	0.000149048	0.00127516	4.56026e-05	0	0	0.000743979	0	0	0	0	0	0	0
ZOTU6137	0	0	0	0	0	0	0	0	0	0	0	0	0	0	0	0	0	0	0	0	0	0	0.00207676	0.00566039	0	1.24278e-05	1.2306e-05	0	0	0	0	0	0	0	0	0	0	0	0	0	0	0	0	0	0	0	0	0	0
ZOTU6442	0	0	0	0	0	0.00204343	0.000386729	0.000164376	0	0	0	0	0	0	0	0	0	0	0	0	0	0	0	0	0	0	0	0	0	0	0	0	0	0.000109299	0.00136094	0.000968784	8.69446e-05	2.04025e-05	0.0014202	0	0.00117645	0	0	0	0	0	0	0	0
ZOTU4931	0	0	0	0	0	0	0.000105472	0	0.000429984	0.000329519	0	0	0	0	0	0	0	0	0	0	0	0	0	0	0	0	0	0	0.00216316	0.001715	1.99637e-05	9.03796e-05	0	4.37195e-06	0.000226823	0.000287047	8.69446e-05	0.000204025	5.86319e-05	0	0	0.000354821	0	0	0	0.00150756	0	0	0
ZOTU5009	0	0	0	0	0	0.00189642	0.000515639	0.000150083	0	0	0	0	0	0	0	0	0	0	5.06881e-05	0	0	0	0	0	0	0	0	0	0	0	0	0	0	0.000109299	0.000247443	0.000215285	0	2.04025e-05	0.000286645	0.00332803	9.80373e-05	0	0.000754189	0	0	0	0	0	0
ZOTU5873	0	0	0	0	0	0.00149949	0.000210943	7.14679e-06	0	0	0	0	0	0	0	0	0	0.00131516	0.000164736	0	0	0	0	0	0	0	0	0	2.94308e-05	0	3.49364e-05	0	0	0.00062956	0.00156714	0.000717618	1.24207e-05	1.02013e-05	0.00117915	0	0.00023529	0	0	0	0	0	0	0	0
ZOTU5370	0	0	0	0	0	0.00151419	0.000386729	0.000107202	0	0	0	0	0	0	0	0	0	0	0.000152064	0	0	0	0	0	0	0	0	0	0	0	0	0	0	0.00128535	0.00204141	0.000897022	0.000211151	2.04025e-05	0.000977199	0	0	0	0	0	0	0	0	0	0
ZOTU5721	0	0	0	0	0	5.88036e-05	2.34381e-05	0.000128642	0.00136162	0.00190701	0	0	0	0	0	0	0	0	0	1.72429e-05	0	0	0	8.07474e-06	0	0	0	0	0.00073577	0.000732248	0.00111297	0.000160675	0	4.37195e-06	0	0.000161464	0.000385041	0.00047946	0	0	0	0.0002747	0	0	0	0	0	0	0
ZOTU6594	0.000193784	0.000285404	0	0	0	0.000735045	0.000550796	0.000986257	0.000143328	0	0	0	0	0	0	0	0	0.000240803	7.60321e-05	0	0	0	0	0	0	0	0	0	0	0	0	0	0	0.000236085	0.00109287	0.00105849	0.00126691	0.000428453	0.000117264	0	0.000137252	0	0	0	0	0	0	0	0
ZOTU575	0	0	0	0	0	4.41027e-05	0	0	0	0	0	0	0	0	0	0	0	0	6.33601e-05	0	0	0	0	0	0	0	0	0	0	0	0	0	0	0	0	0	0	0	5.86319e-05	0.00736846	0	0	0	0	0	0	0	0	0
ZOTU6457	0	0	1.37675e-05	0.00112035	3.00305e-05	0	0	0	0	0	0.000337041	0.00192717	0.000326038	0.000486553	0	0	0	0	0	0.000137943	0.00170524	0.00141374	8.11234e-06	0	0	0	0	2.18608e-05	0	0	0	0	0	0	0	0	0	0	0	0	0	0	0	0	0	0	0	0	0
ZOTU1117	0	0	0	0	0	0	0	0	0	0	0	0	0	0	0	0	0	0	0	0	0	0	0	0	0	0	0	0	0	0	0	0	0	0	0	0	0	0	0	0	0	0	0	0	0	0	0	0.00290243	0
ZOTU7472	0.00641911	4.62817e-05	0	0	0	0	0	0	0	0	0.000385189	0	0	0	0	0	0	0.00038899	0.000215424	0	0	0	1.62247e-05	0	0	0	0	0	0	0	0	0	0	0	0	0	1.24207e-05	0	0	0	0	0	0	0	0	0	0	0	0
ZOTU4872	0.000520795	0	0	0	0	0.000205813	0	0	0	0	0	0	0	0	0	0	0	0.00655726	0.000152064	0	0	0	0	0	0	0	0	0	0	0	0	0	0	0	0	0	0	0	3.90879e-05	0	0	0	0	0	0	0	0	0	0
ZOTU1206	0.000230119	0	0	0	0	0	0	0	0	0	0	0	0	0	0	0	0	0.00698329	0.00025344	0	0	0	0	0	0	0	0	0	0	0	0	0	0	0	0	0	0	0	0	0	0	0	0	0	0	0	0	0	0
ZOTU3340	0	0	0	0	0	0	0	0	7.1664e-05	9.11436e-05	0	0	0	0	0	0	0	0	0	0	0	0	0	0	0	0	0	0	0.000676909	0.000115618	0.000723683	0.000823459	0.00445216	0	0	0.000107643	0	5.10064e-05	0	0	0	0	0	0	3.27418e-05	0	0	0	0
ZOTU843	0	0	0	0	0	0	0	0	0	0	0	0	0	0	0	0	0	0	0	0	0	0	0	8.07474e-06	0	0	0	0	0	0	0	0	1.84737e-05	0	0	0	0	0	0	0	0	0	0	0	0	0.00729977	0	0	0
ZOTU5820	0.00146549	8.48497e-05	0	0	0	0.000676242	0.000117191	2.85872e-05	0	0	0	0	0	0	0	0	0	0.00313044	0.000380161	0	0	0	0	0	0	0	0	0	0	0	0	0	0	0.000100555	0.00082481	0.000358809	6.21033e-05	0	1.9544e-05	0	0.000137252	1.14458e-05	0	0	0	0	0	0	0
ZOTU8279	0	0	0	0	0	0	0	0	0	0	0	0	0	0	0	0	0	0	0	0	0	0	0	2.42242e-05	5.5919e-05	0.000596533	0.00409791	0.00261236	0	0	0	0	0	0	0	0	0	0	0	0	0	0	0	0	0	0	0	0	0
ZOTU1125	0.00489306	0	0	0	0	0	0	0	0	0	0	0	0	0	0	0	0	0.000759456	0.00169805	0	0	0	0	0	0	0	0	0	0	0	0	0	0	0	0	0	0	0	0	0	0	0	0	1.47458e-05	0	0	0	0	0
ZOTU1419	0	0.000424249	0.000881118	0.000162631	0	0	0	0	0	0	0	0	0	0	0	0	0	0	0	3.44857e-05	0	0	2.4337e-05	0	0	0	0	0	0	0	0	0	0	0	0	0	0	0	0	0	0	0	0	0	0	0	0.0014982	0.00104776	0
ZOTU6644	0	0	0	0	0	0.000220514	0.00037501	0	0	0	0	0	0	0	0	0	0	0.00137073	0	0	0	0	0	0	0	0	0	0	0	0	0	0	0	4.37195e-05	0.00348482	0.000556154	1.24207e-05	0	0.0007557	0	0	0	0	0.000501357	0	0	0	0	0
ZOTU6516	0	0	0	0	0	0.00251386	0.00012891	6.43211e-05	0	0	0	0	0	0	0	0	0	0.00187086	0.00012672	0	0	0	0	0	0	0	0	0	0	0	0	0	0	0.000476542	0.000515506	0.00041263	0	0	0.00118567	0	0	0	0	0	0	0	0	0	0
ZOTU4373	0	0	0	0	0	0.00195522	0.00151176	0.000185816	0.00035832	3.50552e-05	0	0	0	0	0	0	0	0	0	0	0	0	0	0	0	0	0	0	0.000147154	0.00102129	1.99637e-05	0	0	0	0	3.58809e-05	0.000173889	0.000112214	3.25733e-05	0	0.000607831	0	0	0.00109119	0	0	0	0	0
ZOTU4758	0.00297943	0	0	0	0	0.000396925	0	0	0	0	0	0	0	0	0	0	0	0.00368614	0.000215424	0	0	0	8.11234e-06	0	0	0	0	0	0	0	0	0	0	0	0	0	0	0	0	0	0	0	0	0	0	0	0	0	0
ZOTU592	0	0	0	0	0	0	0.000175786	0.000100055	0	7.01105e-06	0	0	0	0	0	0	0	0	3.80161e-05	1.72429e-05	0	0	0	0	0	0	0	0	0	0.000154157	0	0	0	3.06036e-05	0.000288684	0.00041263	0.000347779	4.08051e-05	0	0.00565245	0	1.14458e-05	0	0	0	0	0	0	0
ZOTU3485	0	0	0	0	0	0	0	0	0	0	0	0	0	0	0	0	0	0	0	0	0	0	0.00150078	0.00275349	0.00149863	0.00124278	0.000233814	0	0	0	0	0	0	0	0	0	0	0	0	0	0	0	0	0	0	0	0	0	0
ZOTU1259	0	3.8568e-05	0	0	0	0	0	0	7.1664e-05	8.41326e-05	0	0	0	0	0	0	0	0	0	0	0	0	0	0	0	0	0	0	8.82924e-05	0.000886405	0.000374319	0.000482025	0.000609632	0	0	1.79404e-05	0	0	0	0	0	0	0	0	0	0	0	0	0
ZOTU5404	0	0	0	0	0	0	0	5.00275e-05	0.00121829	0.00128302	0	0	0	0	0	0	0	0	0	0.000155186	0	0	0	0	0	0	0	0	0.00119195	0.000462472	0.00087341	0	0	0	0	7.17618e-05	0.000173889	0.00171381	0	0	0	0	0	0	8.18545e-06	0	0	0	0
ZOTU8879	0	0	0.00184484	0.00531261	0	0	0	0	0	0	0	0	0	0	0	0	0	0	0	1.72429e-05	0	0	0	0	0	0	0	0	0	0	0	0	0	0	0	0	0	0	0	0	0	0	0	0	0	0	0	0	0
ZOTU1193	0.00122326	0	0	0	0	0	2.34381e-05	0	0	0	0	0	0	0	0	0	0	0.00539029	7.60321e-05	0	0	0	0	0	0	0	0	0	0	0	0	0	0	0	2.06203e-05	5.38213e-05	0	0	0.000351792	0	0	0	0	0	0	0	0	0	0
ZOTU6546	4.84461e-05	0	0	0	0	0.00229334	0.000726582	0.000100055	0	0	0	0	0	0	0	0	0	0	0.00012672	0	0	0	0	0	0	0	0	0	0	0	0	0	0	0.000113671	0.00210327	0.00121995	0	0	0.00037785	0	0	0	0	0	0	0	0	0	0
ZOTU5011	8.47807e-05	0	0	0	0	0.000235215	0.000175786	0	0	2.80442e-05	0	0	0	0	0	0	0	0	6.33601e-05	0	0	0	0	0	0	0	0	0	0	0	0	0	0	0.00020111	0.00189706	0.00129171	0.000124207	3.06038e-05	0.0027101	0	0.00023529	0	0	0	0	0	0	0	0
ZOTU6415	0	0	0	0	0	0.0032489	0.000515639	0	0	0	0	0	0	0	0	0	0	0	0	0	0	0	0	0	1.11838e-05	0	0	0	0	0	0	0	0	0.000371616	0.00164962	0.00100466	0	0	0.000254072	0	0	0	0	0	0	0	0	0	0
ZOTU1223	0	0	0	0	0.00363369	0	0	0	0	0	0	0	0	0	0	0	0	0	0	0	0	0	8.11234e-06	6.45979e-05	0.000346698	0.00114335	0.0012183	0.000633963	0	0	0	0	0	0	0	0	0	0	0	0	0	0	0	0	0	0	0	0	0
ZOTU6473	2.4223e-05	0	0	0	0	7.35045e-05	4.68763e-05	0	0	0	0	0	0	0	0	0	0	0.00663135	0.000240768	0	0	0	1.62247e-05	0	0	0	0	0	0	0	0	0	0	0	0	0	0	0	0	0	0	0	0	0	0	0	0	0	0
ZOTU7725	0.00015745	0	0	0	0	0	8.20335e-05	0	0	0	0	0	0	0	0	0	0	0.00661283	0.000114048	0	0	0	0	0	0	0	0	0	0	0	0	0	0	0	2.06203e-05	0	0	0	0	0	0	0	0	0	0	0	0	0	0
ZOTU1048	0	0	0	0	0	0.000308719	0.000398448	0.000428807	0	5.60884e-05	0	0	0	0	0	0	0	0	0.000304129	0.0002414	0	0	0	0	0	0	0	0	0	1.92697e-05	2.99455e-05	0	9.23685e-05	8.7439e-06	0.000226823	0	0.000124207	0.000102013	0	0.00443044	5.88224e-05	0.00013735	0	0	1.63709e-05	0	0	0	0
ZOTU5738	0	0	0	0	0	0	0	0	0	0	0	0	0	0	0	0	0	0	0	0	0	0	0	0	0	0	0	0	0	0	0	0	0	0	0	0	0	0	0	0	0	0	0	0	0	0	0	0.000614206	0
ZOTU9283	0	0	0	0	0	0.000205813	0.00132425	0.000714679	0.0010033	0.000259409	0	0	0	0	0	0	0	0	0	0	0	0	0	0	0	0	0	0	0	0	0	0	0	1.74878e-05	0.000144342	0.000448511	0.000409882	0.000448856	0	0	0.000941158	0	0	0.00101746	0	0	0	0	0
ZOTU1053	0	0.000215981	0	0	0	0.000191112	0.000363291	9.29082e-05	0.000644976	0.00086937	0	0	0	0	0	0	0	0	6.33601e-05	0	0	0	8.11234e-06	0	0	0	0	0	5.88616e-05	0.000211966	7.48637e-05	0.000100422	0.00014779	0	0	0.000215285	0.00057135	0.000734492	0	0	0.000333327	0.00147651	0	0.00056034	0	0	0	0	0
ZOTU1169	0	0	0	0	0	5.88036e-05	0	0	0	0	0	0	0	0	0	0	0	0	0	0	0	0	0	0	0	0	0	0	0	0.000404663	2.99455e-05	0.000110464	0.00615174	5.24634e-05	0	3.58809e-05	0	4.08051e-05	1.9544e-05	0	0	0	0	0	0	0	0	0	0
ZOTU1331	0.0003149	0	0	0	0	5.88036e-05	0.000281258	5.00275e-05	7.1664e-05	0.000147232	0	0	0	0	0	0	0	0	0.000152064	0.000310372	0	0	0	0	0	0	0	0	0.00129496	0.000404663	0.00180671	5.02109e-05	0	0	4.12405e-05	0.000538213	2.48413e-05	0.000173422	0	0	0	9.15667e-05	0	0.00109119	0	0	0	0	0
ZOTU8924	0	7.71361e-06	0.00619536	0.000686664	0	0	0	0	0	0	0	0	0	0	0	0	0	0	0	0	0	0	0	0	0	0	0	0	0	0	0	0	0	0	0	0	0	0	0	0	0	0	0	0	0	0	0	0	0
ZOTU3356	0	0	0	3.61402e-05	0.00668178	0	0	0	0	0	0	0	0	0	0	0	0	0	0	0	0	0	0	0	0	1.24278e-05	9.84482e-05	5.4652e-05	0	0	0	0	0	0	0	0	0	0	0	0	0	0	0	0	0	0	0	0	0
ZOTU910	0.000666134	0	0	0	0	0.000294018	0.000363291	0.000207257	0	0	0	0	0	0	0	0	0	0.00061127	1.2672e-05	0	0	0	0	0	0	0	0	0	0	0	0	0	0	8.7439e-06	4.12405e-05	0.00107643	0.000583771	0.000428453	0	0.00248562	9.80373e-05	0	0	0	0	0	0	0	0
ZOTU6436	1.21115e-05	0	0	0	0	0.00233744	0.00076174	7.14679e-06	0	4.20663e-05	0	0	0	0	0	0	0	0	0.000392833	0	0	0	0	0	0	0	0	0	0	0	0	0	0	3.49756e-05	0.000866051	0.000430571	0	0	0.00065798	0	0.00133331	0	0	0	0	0	0	0	0
ZOTU556	0	0	0	0	0	1.47009e-05	0	0	0	0	0	0	0	0	0	0	0	0	0	0	0	0	0	0	0	0	0	0	0	0	0	0	0	3.06036e-05	0	0	0	0	0	0.00681726	0	0	0	0	0	0	0	0	0
ZOTU6861	0	0	0	1.80701e-05	0	0.00267557	0.000210943	0	0.000214992	0	0	0	0	0	0	0	0	0	0	0	0	0	0	0	0	0	0	0	0	0	0	0	0	0.00133782	0.00167024	0.000304987	0	0.000367246	3.25733e-05	0	0	0	0	0	0	0	0	0	0
ZOTU1362	0	0	0	0	0	7.35045e-05	0.000328134	0.000657504	7.1664e-05	0.000560884	0	0	0	0	0	0	0	0	0	0	0	0	0	0	0	0	0	0	0	0.000635899	0	0	0	0	0.000309304	0.000484392	0.000695557	0.00064268	0	0	9.80373e-05	0	0.00187862	0.000368645	0	0	0	0	0
ZOTU5729	0	0	0	0	0	5.88036e-05	0.000164067	7.14679e-05	0.000214992	0.000119188	0	0	0	0	0	0	0	0	0.00025344	0	0	0	0	0	0	0	0	0	0	7.70787e-05	0	0	0	7.43231e-05	0.000247443	0.00121995	0.00105576	0.0032236	0	0	0	1.14458e-05	0	0	0	0	0	0	0
ZOTU6685	0	0	0	0	0	1.47009e-05	4.68763e-05	0.000171523	0.00214992	0.000659039	0	0	0	0	0	0	0	0	0	0	0	0	0	0	0	0	0	0	0.000161869	0.00159938	0	0	0	0	0	0	0.000621033	0.000530466	0	0	0	0.000835546	0	0	0	0	0	0	0
ZOTU3370	0	0.000115704	0	0	0	0	4.68763e-05	3.57339e-05	0.000429984	0.000960514	0	0	0	0	0	0	0	0	0	1.72429e-05	0	0	0	0	0	0	0	0	0.000132439	0.000173427	4.99092e-06	1.00422e-05	3.69474e-05	4.37195e-05	0	8.97022e-05	0.000434723	0.000571271	0	0	0.000549009	0.000892775	0.000137125	0.00107644	0.000982254	0	0	0	0
ZOTU1234	0	0	0	0	0	0	0	0	0	1.40221e-05	0	0	0	0	0	0	0	0	0	0	0	0	0	0	0	0	0	0	0	0.000173427	1.49727e-05	0	0	0	0	0	0	0	0	0	0	0	0	0	9.00399e-05	0.00576954	0	0	0
ZOTU2814	0	0	0	0	0	0.000249915	0.000351572	0.00017867	0.000214992	0.000154243	0	0	0	0	0	0	0	0	0	0	0	0	0	0	0	0	0	0	4.41462e-05	7.70787e-05	0	0	0	7.43231e-05	0.00127846	0.0010226	0.000683136	0.000183623	7.16612e-05	0.00139361	0.000686261	9.15667e-05	0	0	0	0	0	0	0
ZOTU852	0	0	0	0	0	0.000132308	0	0	0.000214992	0.000119188	0	0	0	0	0	0	0	0	0	0	0	0	0	0	0	0	0	0	0	0	0	0.000110464	0	0	0	0	3.7262e-05	1.02013e-05	0	0.00606325	0	2.28917e-05	0	0	0	0	0	0	0
ZOTU1357	0.000266454	0.000701938	0	0	0	0	0.0014766	0.000321605	0	3.50552e-05	0	0	0	0	0	0	0	0.000185233	0.000811009	0.000344857	0	0	0	0	0	0	0	0	0	0	0	0	0	0.000424079	0.000494886	0.000251166	0.000335358	6.12076e-05	9.77199e-05	0	0.000843121	0	0	5.89831e-05	0	0	0	0	0
ZOTU3977	0	0.000856211	0	0	0	0.000176411	0.00148832	0.000750413	0.00035832	0.000112177	0	0	0	0	0	0	0	0	0.000202752	0.000172429	0	0	0	0	0	0	0	0	0	9.63484e-05	0	0	0	2.62317e-05	0.000164962	0.000179404	0.000434723	0.00104053	1.30293e-05	0	0.000137252	8.01209e-05	0.000315388	0	0	0	0	0	0
ZOTU6012	0	0	0	0	0	0.0016171	0.000281258	0	0	0	0	0	0	0	0	0	0	0	0	0	0	0	0	0	0	0	0	0	0	0	0	0	0	0.000236085	0.00101039	0.000735558	3.7262e-05	0	0.0019544	0	0.000725476	0	0	0	0	0	0	0	0
ZOTU5967	0.00202262	0	0	0	0	0.000294018	0	0	0	0	0	0	0	0	0	0	0	0.00405661	5.06881e-05	0	0	0	6.48987e-05	0	0	0	0	0	0	0	0	0	0	0	0	0.000107643	0	0	0	0	0	0	0	0	0	0	0	0	0
ZOTU2473	0	0.000331685	0	0	0	0	0	0	0.000286656	0.00039963	0	0	0	0	0	0	0	0	0	1.72429e-05	0	0	0	0	0	0	0	0	0	1.92697e-05	0	0	0	0	0	1.79404e-05	0.000198731	0.000703888	0	0	0.00113723	0.00295303	0	0.000501357	0	0	0	0	0
ZOTU4469	0	0	0	0	0	0.000147009	0.000714863	3.57339e-05	0	0	0	0	0	0	0	0	0	0	0	0	0	0	0	0	0	0	0	0	0	7.70787e-05	0	0	0	0.000227341	0.00210327	0.00161464	0	0.000122415	0.000306189	0	0.00121566	0	0	0	0	0	0	0	0
ZOTU6115	0	0	4.13024e-05	5.42103e-05	0	0	0	0	0	0	0.0016852	0.00284723	0.00193252	0	0	0	0	0	0	0	0	0	0	0	0	0	0	0	0	0	0	0	0	0	0	0	0	0	0	0	0	0	0	0	0	0	0	0	0
ZOTU2039	0	0	0	0	0	0	0	0	0	0	0	0	0	0	0	0	0	0	0	0	0	0	0	0	0	0	0	0	0.000323739	0.00610849	1.49727e-05	0	0	0	0	7.17618e-05	0	0	0	0	0	0	0	0	0	0	0	0	0
ZOTU4600	0.00306422	2.31408e-05	0	0	0	0	1.17191e-05	1.42936e-05	0	0	0	0	0	0	0	0	0	0.00324158	0.000101376	0	0	0	3.24494e-05	0	0	0	0	0	0	0	0	0	0	0	0	1.79404e-05	0	0	0	0	0	0	0	0	0	0	0	0	0
ZOTU7137	0	0	0	0	0	0.00141129	7.03144e-05	0	0	0	0	0	0	0	0	0	0	0	0	0	0	0	0	0	0	0	0	0	0	0	0	0	0	0.00130721	0.00261877	7.17618e-05	0	0	0.000918567	0	9.80373e-05	0	0	0	0	0	0	0	0
ZOTU4602	0	0	0	0	0	0.000441027	0.00012891	0	0	0	0	0	0	0	0	0	0	0	0	0	0	0	0	0	0	0	0	0	0	0	0	0	0	0.00191491	0.000206203	0.000376749	0	0	0.0034202	0	0	0	0	0	0	0	0	0	0
ZOTU6643	0	0	0	0	0	0.00205813	0.000140629	0	0	7.01105e-06	0	0	0	0	0	0	0	0.000185233	6.33601e-05	0	0	0	0	0	0	0	0	0	0	0	0	0	0	0.00123289	0.00179396	0.000466451	0	5.10064e-05	0.000429967	0	0	0	0	0	0	0	0	0	0
ZOTU982	0	0	0	0	0	0	0	0	0	0.000161254	0	0	0	0	0	0	0	0	0	0	0	0	0	0	0	0	0	0	0.000147154	0.000211966	0.00226588	0.00105443	0.000332527	3.49756e-05	0	3.58809e-05	2.48413e-05	2.04025e-05	0	0	0	1.14458e-05	0	0	0.00119508	0	0	0	0
ZOTU1336	0	0	0	0	0	0	0	6.43211e-05	0	0	0	0	0	0	0	0	0	0	0.00012672	0	0	0	0	0	0	0	0	0	0	0	0	0	0	3.49756e-05	0.000412405	8.97022e-05	9.93653e-05	0	0.00262541	0.00295363	0	0	0	0	0	0	0	0	0
ZOTU1534	0.0012596	0.00036254	0	0	0	0	0	0	0	0	0	0	0	0	0	0	0	0.00472345	3.80161e-05	0	0	0	0	0	0	1.24278e-05	0	0	0	0	0	0	0	0	0	0	0	0	0	0	0	0	0	0	0	0	0	0	0
ZOTU1093	0	0	0	0	0	0.000426326	8.20335e-05	0.000428807	0	0	0	0	0	0	0	0	0	0	6.33601e-05	0	0	0	0	0	0	0	0	0	0.000132439	0	0	0	0	4.80914e-05	0.000268063	0.000179404	0.000161469	1.02013e-05	2.60586e-05	0.00213722	0.00115684	4.57834e-05	0.00122042	0	0	0	0	0	0
ZOTU6062	0	0	0	0	0	0.000132308	0.00103128	0.00388785	0.000143328	9.11436e-05	0	0	0	0	0	0	0	0	0	0	0	0	0	0	0	0	0	0	4.41462e-05	1.92697e-05	0.000139746	0	0	4.80914e-05	4.12405e-05	8.97022e-05	0.000223572	9.18114e-05	0	0	0	0.000160242	0	0.000235933	0	0	0	0	0
ZOTU9662	0.00159872	0	0	0	0	0	0	0	0	0	0	0	0	0	0	0	0	0.00464935	2.5344e-05	0	0	0	4.05617e-05	1.61495e-05	0	1.24278e-05	0	0	0	0	0	0	0	0	0	1.79404e-05	0	0	0	0	0	0	0	0	0	0	0	0	0
ZOTU2950	0	0	0	0	0	0	0	0	0	0	0	0	0	0	0	0	0	0	0	0	0	0	0	0	0	0	0	0	0	0	0	0	0	0	0	0	0	0	0	0	0	0	0	0	0	0	0	0.00252908	0
ZOTU6614	0	0	0	0	0	0.00191112	7.03144e-05	0	0	0	0	0	0	0	0	0	0	0	0	0	0	0	0	0	0	0	0	0	0	0	0	0	0	0.00370304	0.000164962	0.000143524	3.7262e-05	0	0.000299674	0	0	0	0	0	0	0	0	0	0
ZOTU5597	0	0	0	0	0	0.00129368	0	0	0	0	0	0	0	0	0	0	0	0	0	0	0	0	0	0	0	0	0	0	0	0	0	0	0	0.00227341	0.00181458	0.000376749	0	0	0.000566775	0	0	0	0	0	0	0	0	0	0
ZOTU3347	0	0	0	0	0	0.000176411	0.00139457	0.000214404	0.000214992	2.80442e-05	0	0	0	0	0	0	0	0	0.00012672	5.17286e-05	0	0	0	0	0	0	0	0	0	0	0	0	0	0	4.12405e-05	0.000125583	0.000223572	0.000295837	0	0	0	0.000194579	0	0.00318509	0	0	0	0	0
ZOTU4770	0	0	0	0	0	0.000779148	0.000515639	0.00106487	0.000143328	1.40221e-05	0	0	0	0	0	0	0	0	0	0	0	0	0	0	0	0	0	0	0	0	2.49546e-05	0	0	0.000240457	0.000597987	0.000304987	0.000819764	0.00103033	0	0	0.000431364	0.000297592	0	0	0	0	0	0	0
ZOTU1407	0.000617688	0.00979628	0	0	0	0.00179351	0.00823851	0.00591039	0.00573312	0.00728448	0.000457412	0	0	0	0	0	0	0.000518653	0.00312999	0.00408656	0	0	0	0	0	0	0	0	0.0224704	0.0252047	0.00659799	0.0112472	0.00387948	0.000424079	0.000391785	0.00358809	0.00648359	0.00532506	0.000299674	0	0.00464697	0.00553979	0.020939	0.0285478	0.000843101	6.80102e-05	0	0	0
ZOTU4456	0	0	0	0	0	0.00138189	0.000386729	0.000493128	0.000286656	4.90773e-05	0	0	0	0	0	0	0	0	0.000608257	0	0	0	0	0	0	0	0	0	0.000279593	0	9.98183e-06	0	0	0.000253573	0.000556747	0.000233226	0.000484406	0.000663083	0	0	0.000431364	0.000125904	0	0	0	0	0	0	0
ZOTU7780	9.68922e-05	0	0	0	0	8.82055e-05	7.03144e-05	0	0.000286656	0.000616972	0	0	0	0	0	0	0	0	0.000468865	0	0	0	0	0	0	0	0	0	0.000117723	0.000635899	0.000359346	0	0.000166263	0	2.06203e-05	3.58809e-05	0.000161469	0.0008059	0	0	0.000352934	0.00128193	0	0.000501357	9.00399e-05	6.80102e-05	0	0	0
ZOTU1840	0	0	0.000702141	0.000271052	0	0	0	0	0	0	0	0	0	0	0	0	0	0	0	0	0	0	0	0	0	0	0	0	0	0	0	0	0	0	0	0	0	0	0	0	0	0	0	0	0	0	0	0	0
ZOTU4970	0.000641911	0	0	0	0	0.00246975	2.34381e-05	0	0	0	0	0	0	0	0	0	0	0.00061127	0	0	0	0	0	0	0	0	0	0	0	0	0	0	0	0.000939969	0.000659848	5.38213e-05	0	0	0.000820847	0	0	0	0	0	0	0	0	0	0
ZOTU4904	0	0	0	0	0	0.000176411	0.00012891	0	0	0	0	0	0	0	0	0	0	0	0	0	0	0	0	0	0	0	0	0	0	0	0	0	0	0.000148646	0.00129908	0.00213491	1.24207e-05	0	0.0023127	0	0	0	0	0	0	0	0	0	0
ZOTU5028	0	0	0	0	0	0.00210223	0.000140629	0.000100055	0	0	0	0	0	0	0	0	0	0	0	0	0	0	0	0	0	0	0	0	0	0	0	0	0	1.31158e-05	0.000618608	0.000233226	0	1.02013e-05	0.00142671	0	0.000372542	0	0	0.00119441	0	0	0	0	0
ZOTU839	0	0	0	7.22804e-05	0	0	0	0	0	0	0	0	0	0	0	0	0	0	0	0	0	0	0.000405617	0.00457838	0.000905888	7.45666e-05	9.84482e-05	4.37216e-05	0	0	0	0	0	0	0	0	0	0	0	0	0	0	0	0	0	0	0	0	0
ZOTU9411	0	1.54272e-05	0	0	0	0	0	0	0	0	0	0	0	0	0	0	0	0	0	0.00170704	0.00369717	0.000613862	9.73481e-05	1.61495e-05	0	0	0	0	0	0	0	0	0	0	0	0	0	0	0	0	0	0	1.37125e-05	1.47458e-05	0	0	0	0	0
ZOTU1061	0	0.00126503	0.00267089	7.22804e-05	0	0	0	0	0	0	0	0	0	0	0	0	0	0	0	0	0	0	0.00163869	8.88221e-05	0	0	0	0	0	0	0	0	0	0	0	0	0	0	0	0	0	0	0	0	0	0	0.000179425	0	0
ZOTU1211	0	0	0	0	0	0	0	0	0	0	0	0	0	0	0	0	0	0	0	0	0	0	0	8.07474e-06	0.000156573	0.000894799	0.00172284	0.00337749	0	0	0	0	0	0	0	0	0	0	0	0	0	0	0	0	0	0	0	0	0
ZOTU5708	0	0	0	0	0	0.000690943	7.03144e-05	0	0	0	0	0	0	0	0	0	0	0	0	0	0	0	0	0	0	0	0	0	0	0	4.99092e-06	0	0	7.86951e-05	0.000309304	7.17618e-05	0	0	0	0.00444084	0.000490186	0	0	0	0	0	0	0	0
ZOTU8447	0	0	0	0	0	0	1.17191e-05	2.14404e-05	0.000286656	0.000827304	0	0	0	0	0	0	0	0	0	0	0	0	0	0	0	0	0	0	0.00107422	0.001715	0.000444192	0.000170717	0	0	0	0.000538213	0.000124207	0.000652881	0	0	0	0.000286146	0	0	0	0	0	0	0
ZOTU710	0.000387569	0.00562322	8.26048e-05	0	0	0	0	0	0	0	0	0	0	0	0	0	0	0	0	0	0	0	0	0	0	0	0	0	0	0	0	0	0	0	0	0	0	0	0	0	0	0	0	0	0	0	0	0	0
ZOTU6004	0	0	0	0	0	0.000352822	0.00150004	0.000628917	0	3.50552e-05	0	0	0	0	0	0	0	0	0.000291457	0.000586257	0	0	0	0	0	0	0	0	0	0	0	0	0	2.62317e-05	0	0.000861141	0.000173889	0.000224428	0	0	0.0010588	0.000309038	0	0	0	0	0	0	0
ZOTU8594	0.00209529	0.000323972	0	0	0	4.41027e-05	1.17191e-05	0	0	0	0	0	0	0	0	0	0	0.0027785	0.000101376	0	0	0	0	0	0	0	0	0	0	0	0	0	0	0	0	0	0	0	0.000495114	0	0.000196075	0	0	0	0	0	0	0	0
ZOTU6095	0	0	0	0	0	0.00194052	0.000492201	0.00126498	0.000429984	6.30994e-05	0	0	0	0	0	0	0	0	0	0	0	0	0	0	0	0	0	0	0	1.92697e-05	0	0	0	0.00013553	0.000969152	0.000520273	0.000136627	4.08051e-05	0	0	0	0	0	0	0	0	0	0	0
ZOTU1427	0	0	0	0	0	0	0	7.14679e-05	0.000573312	0.00073616	0	0	0	0	0	0	0	0	0	0	0	0	0	0	0	0	0	0	2.94308e-05	0.000847866	0	0	0	0	0	0.000663796	0.00129175	0.00170361	0	0	0	2.28917e-05	0	0	6.54836e-05	0	0	0	0
ZOTU7212	0.00421481	0	0	1.80701e-05	0	0.000176411	0	0	0	0	0	0	0	0	0	0	0	0.00144482	0	0	0	0	4.05617e-05	1.61495e-05	0	0	0	0	0	0	0	0	0	0	0	5.38213e-05	0	0	0	0	0	0	0	1.47458e-05	0	0	0	0	0
ZOTU2771	0	0	0.00184484	0.00397542	0	0	0	0	0	0	0	0	0	0	0	0	0	0	0	0.000155186	0	0	0	0	0	0	0	0	0	0	0	0	0	0	0	0	0	0	0	0	0	0	0	0	0	0	0	0	0
ZOTU4460	0	0	0	0	0	0.00149949	0.0002461	9.29082e-05	0.000214992	0.000196309	0	0	0	0	0	0	0	0	0.00012672	0	0	0	0	0	0	0	0	0	0.000161869	0.000211966	1.99637e-05	5.02109e-05	0	0.000410963	0.00144342	0.000645856	0.000173889	0.000193824	5.86319e-05	0	0.000196075	0	0	0	0	0	0	0	0
ZOTU2021	0	0	0	0	0	0	2.34381e-05	2.14404e-05	0	0	0	0	0	0	0	0	0	0.000129663	0.00102643	0.00451763	0	0	0	0	0	0	0	0	0	0	0	0	0	0	0	1.79404e-05	0	0	0	0	0	0	0.000178263	0	0	0	0	0	0
ZOTU1390	0	0	0	0	0	0.000294018	1.17191e-05	0	0	0.000189298	0	0	0	0	0	0	0	0	0.00019008	0	0	0	0	0	0	0	0	0	0	0.000366124	0	0	0	0	0	0.000197345	9.93653e-05	0.000346843	7.16612e-05	0	0.000686261	0.00246086	0	0.000987967	0	0	0	0	0
ZOTU4354	1.21115e-05	0	0	0	0	0.000514532	0.000843773	0.000100055	0	0	0	0	0	0	0	0	0	0	3.80161e-05	0	0	0	0	0	0	0	0	0	7.3577e-05	3.85394e-05	0	0	0	0.000126786	0.00082481	8.97022e-05	3.7262e-05	0	0.000273616	0	0.0029019	0	0	1.47458e-05	0	0	0	0	0
ZOTU4941	0	0	0	0	0	0	0	0	0.000644976	0.000890403	0	0	0	0	0	0	0	0	0	0.0008449	0	0	0	0	0	0	0	0	0	0.000269776	3.99273e-05	1.00422e-05	7.38948e-05	0	2.06203e-05	0.000304987	0.00055893	0.00114254	0	0	0	0.00107591	0	0	0	0	0	0	0
ZOTU8572	0	0	0	0	0	0	0	0	0.000143328	1.40221e-05	0	0	0	0	0	0	0	0	0	0	0	0	0	0	0	0	0	0	0	0	0	0	0	0	0	1.79404e-05	0	0	0	0	0	0	0	0	2.45563e-05	0.00554284	0	0	0
ZOTU883	0	0	0	0	0	0	0	0	0	2.80442e-05	0	0	0	0	0	0	0	0	0	0	0	0	0	0	0	0	0	0	0	0	0	0	0	0	0	0	0	0	0	0	0	8.01209e-05	0	0	0.000351974	0	0	0	0
ZOTU1209	0	0	0	0	0	0	0	0	0	0	0	0	0	0	0	0	0	0	0	0	0	0	0	0	0.000201309	0.00113093	0.00257196	0.0018691	0	0	0	0	0	0	0	0	0	0	0	0	0	0	0	0	0	0	0	0	0
ZOTU988	0.000169561	0.00557694	0	0	0	0	0	0	0	0	0	0	0	0	0	0	0	0	0	0	0	0	0	0	0	0	0	0	0	0	0	0	0	0	0	0	0	0	0	0	0	0	0	0	0	0	0	0	0
ZOTU4628	0	0	0	0	0	0	0	0	0.000214992	9.11436e-05	0	0	0	0	0	0	0	0	0	0	0	0	0	0	0	0	0	0	0	0.000250506	0	0	0	0	0	3.58809e-05	7.4524e-05	0.000204025	0	0	0.000803906	0.00404038	0	0	0	0	0	0	0
ZOTU5526	0.000109004	0	0	0	0	0.00111727	0.0002461	0.000157229	0	0	0	0	0	0	0	0	0	0.000518653	0.000266112	0	0	0	8.11234e-06	0	0	0	0	0	0	0	0	0	0	0.000974944	0.000886671	0.000233226	4.96827e-05	3.06038e-05	0.00109446	0	3.92149e-05	0	0	0	0	0	0	0	0
ZOTU9532	0	0	0	0	0	0.000220514	1.17191e-05	0	0	0	0	0	0	0	0	0	0	0	0	0	0	0	0	0	0	0	0	0	0	0	0	0	0	0.00283739	0.000247443	5.38213e-05	0	0	0.00235831	0	0	0	0	0	0	0	0	0	0
ZOTU8875	0	0	0	0	0.00543552	0	0	0	0	0	0	0	0	0	0	0	0	0	0	0	0	0	0	0	0	6.21388e-05	0.000159978	6.55824e-05	0	0	0	0	0	0	0	0	0	0	0	0	0	0	0	0	0	0	0	0	0
ZOTU1173	0	0	0	0	0	0	0	0	0	0	0	0	0	0	0	0	0	0	0	0	0	0	1.62247e-05	0.00016957	3.35514e-05	0	0	0	0	0	0	0	0	0	0	0	0	0	0	0	0	0	0	0	0	0	0	0	0
ZOTU4774	0	0	0	0	0	0	0	0	7.1664e-05	0.000168265	0	0	0	0	0	0	0	0	0	0	0	0	0	0	0	0	0	0	0	5.7809e-05	0	0	0	0	0	0	0	8.16102e-05	0	0	0	0.000125904	0	0	0	0.00478339	0	0	0
ZOTU8541	0	0	0	1.80701e-05	1.50152e-05	0	0	0	0	0	7.2223e-05	0.00222557	0.000391246	0.000654329	0.00220791	4.3049e-05	0	0	0	0	0	0	8.11234e-06	0	1.11838e-05	0	1.2306e-05	2.18608e-05	0	0	0	0	0	0	0	0	0	0	0	0	0	0	0	0	0	0	0	0	0
ZOTU2615	0.00135649	0	0	0	0	0.000617438	0	0	0	0	0	0	0	0	0	0	0	0.00359352	0	0	0	0	0	0	0	0	0	0	0	0	0	0	0	9.18109e-05	2.06203e-05	0	0	0	0	0	0	0	0	0	0	0	0	0	0
ZOTU2104	0	0	0	0	0	0.000191112	0.000433606	0.00375921	0.000143328	0	0	0	0	0	0	0	0	0	0	0	0	0	0	0	0	0	0	0	0	0	0	0	0	0	0.000144342	3.58809e-05	0.000273255	0.000102013	3.25733e-05	0	0.000196075	0.000366267	0	0	0	0	0	0	0
ZOTU8298	0	0	0	0	0	0.00211693	0.000410167	2.14404e-05	7.1664e-05	0	0	0	0	0	0	0	0	0	0	0	0	0	0	0	0	0	0	0	1.47154e-05	0	4.99092e-06	0	0	0.00051589	0.00146404	0.000735558	0.000111786	1.02013e-05	0.000123779	0	0	0	0	7.37289e-05	0	0	0	0	0
ZOTU4034	0	0	0	0	0	0	0	0	0	0	0	0	0	0	0	0	0	0	0	0	0	0	0	0	0	0	0	0	0	0	0	0	0	0	0	0	0	3.06038e-05	0	0	0	0	0	0	9.82254e-05	4.53402e-05	0.00286183	0	0
ZOTU5373	0.000133227	0	0	0	0	0.000191112	1.17191e-05	6.43211e-05	0	0	0	0	0	0	0	0	0	0.00463083	6.33601e-05	0	0	0	0	0	0	0	0	0	0	0	0	0	0	0	0.000329924	0.000215285	0	0	0	0	0	0	0	0	0	0	0	0	0
ZOTU2811	0	0	0	0	0	0.00342531	7.03144e-05	0	0	0	0	0	0	0	0	1.43497e-05	0	0.000703886	0	0	0	0	0	0	0	0	0	0	0	0	0	0	0	0.000371616	0.00076295	8.97022e-05	0	0	0	0	0.000176467	0	0	0	0	0	0	0	0
ZOTU5737	0	0	0	0	0	0.000926157	0	7.86147e-05	0	0	0	0	0	0	0	0	0	0	0	0	0	0	0	0	0	0	0	0	0	0	0	0	0	0.000393475	0.000103101	7.17618e-05	4.96827e-05	0	0.000586319	0.00340083	0	0	0	0	0	0	0	0	0
ZOTU1086	0	0	0	0	0	0	0	0	0	2.80442e-05	0	0	0	0	0	0	0	0	0	0	0	0	0	0	0	0	0	0	0.000235446	0.000231236	6.48819e-05	0	0	4.37195e-06	0	1.79404e-05	3.7262e-05	7.14089e-05	1.9544e-05	0.00453964	0.000137252	0	0	0.000191695	2.45563e-05	0	0	0	0
ZOTU5970	0	0	0	0	0	0.00127898	0.000550796	0.000314459	0	0	0	0	0	0	0	0	0	0.000592746	0.00012672	0	0	0	0	0	0	0	0	0	0	0	0	0	0	5.24634e-05	0.00146404	0.000322928	1.24207e-05	3.06038e-05	0.000469055	0	0.000372542	0	0	0	0	0	0	0	0
ZOTU365	0.000763026	0.00371796	0	0	0	0.00664481	0.0130433	0.0326394	0.00157661	0.000546862	0.000216669	0	0	0	1.544e-05	0	0	0.00033342	0.00515751	0.000689715	0	0	0	0	0	0	0	0	7.3577e-05	7.70787e-05	2.99455e-05	0.000220928	9.23685e-05	0.000577097	0.00558809	0.00240402	0.00514215	0.00294817	0.00112704	0.022849	0.00970569	0.00298736	0.00658201	0.00324407	8.18545e-06	0	0	0	0
ZOTU1432	0	0.000956488	0	0	0	4.41027e-05	0.00117191	0	0	0	0	0	0	0	0	0	0	0	0.000620929	0	0	0	0	0	0	0	0	0	0	0	0	0	0	0	4.12405e-05	0	0.000347779	2.04025e-05	2.60586e-05	0	0.00170585	8.01209e-05	0	0.00056034	0	0	0	0	0
ZOTU8442	0.000121115	0.000655657	0	0	0	0.00102906	0.00180474	0.00139362	0.00437151	0.0058402	0	0	0	0	0	0	0	0.000185233	0.000988418	0.000206914	0	0	0	0	0	0	1.2306e-05	0	0.00233975	0.00319877	0.00135254	0.000532235	0.000166263	0.000730115	0.00243319	0.00303193	0.00540299	0.00685525	0.0014658	0.0117313	0.0120978	0.01512	0.00311274	0.00430577	0.00256205	4.53402e-05	0	0	0
ZOTU7209	0.00337911	0	0	0	0	4.41027e-05	0.000445325	0.000614624	0	2.80442e-05	0	0	0	0	0	0	0	0	0.000798337	6.89715e-05	0	0	0	0	0	0	0	0	0	0	0	0	0	0	0.000164962	1.79404e-05	0	0	0	0	0	0	0	0	0	0	0	0	0
ZOTU7261	0.00354868	0.00172013	0	0	0	0	0	0	0	0	0	0	0	0	0	0	0	0	0	0	0	0	8.11234e-06	0	0	0	0	0	0	0	0	0	0	0	0	0	0	0	0	0	0	0	0	0	0	0	0.000242224	0	0
ZOTU9654	0	0	0	0	0	0.00120547	0.000140629	0	0	0	0	0	0	0	0	0	0	0	3.80161e-05	0	0	0	0	0	0	0	0	0	0	0	0	0	0	0.00213351	0.00140218	0.000448511	0	0	0.000169381	0	0	0	0	0	0	0	0	0	0
ZOTU6766	0	0	0	0	0	0.000852653	0.000105472	0.000207257	7.1664e-05	0	0	0	0	0	0	0	0	0	0	1.72429e-05	0	0	0	0	0	0	0	0	0	0	0	0	0	0.00015739	0.000866051	0.000484392	0.000459565	1.02013e-05	3.90879e-05	0.00226202	0	0	0	0	0	0	0	0	0
ZOTU4287	0	0	0	0	0	0.000147009	7.03144e-05	0	0.000429984	0.00138819	0	0	0	0	0	0	0	0	6.33601e-05	0.000189672	0	0	0	0	0	0	0	0	2.94308e-05	0.000134888	0.000159709	0	0	0	0	3.58809e-05	7.4524e-05	0.000999725	0.000110749	0	0	0.00103013	0	0.000648814	0	0	0	0	0
ZOTU5808	0	0	0	0	0	0.00108787	0.000269539	6.43211e-05	0	0	0	0	0	0	0	0	0	0	0	0	0	0	0	0	0	0	0	0	0.000117723	7.70787e-05	0	0	0	0.000760719	0.00134032	0.000466451	0	1.02013e-05	0.0010228	0	0.000294112	0	0	0	0	0	0	0	0
ZOTU4283	0	0	0	0	0	0.000367523	0.000152348	0.00022155	0.000859968	0.000126199	0	0	0	0	0	0	0	0	0.000177408	0	0	0	0	0	0	0	0	0	0.000382601	0.000404663	0	0	0	4.37195e-06	0.00107225	0.00136347	0.00018631	0.000183623	0	0	0	0	0	0	0	0	0	0	0
ZOTU1202	0	0	0	0	0	0	0.00012891	0	0.000214992	0.000119188	0	0	0	0	0	0	0	0.00027785	0	0	0	0	0	0	0	0	0	0	0.000132439	0.000269776	9.48274e-05	0	0	9.18109e-05	0	0.000251166	0.000459565	0.000173422	4.56026e-05	0	0.000333327	0.0010988	0.00179634	0	0	0	0	0	0
ZOTU1956	0	0	0	0	0	0.000147009	0.000117191	0.00323035	7.1664e-05	0.000140221	0	0	0	0	0	0	0	0	0	0	0	0	0	0	0	0	0	0	7.3577e-05	0.000192697	2.99455e-05	4.01687e-05	3.69474e-05	2.62317e-05	0.000164962	0.000287047	0.000285675	0.000326441	8.46906e-05	0	0.000117645	0.000114458	0	0	0	0	0	0	0
ZOTU1180	0	0	0	0	0	0.00213163	5.85954e-05	0	0	0	0	0	0	0	0	0	0	0	0	0	0	0	0	0	0	0	0	0	0	0	0	0	0	0.000904993	0.00148466	0.000287047	0	0	0.000586319	0	0	0	0	0	0	0	0	0	0
ZOTU4345	0	0	0	0	0	0.000132308	0.000199224	0.000857615	0.00035832	0.00053284	0	0	0	0	0	0	0	0	0	0	0	0	0	0	0	0	0	0	7.3577e-05	0.000115618	8.48456e-05	0.000100422	5.54211e-05	2.62317e-05	0.000268063	0.000789379	0.000707978	0.000428453	0	0	0.000470579	1.14458e-05	0	0	0	0.000238036	0	0	0
ZOTU1332	0.00248286	0	0	0	0	4.41027e-05	0.00012891	0	0	0	0	0	0	0	0	0	0	0.00251917	5.06881e-05	0	0	0	4.05617e-05	0	0	0	0	0	0	0	0	0	0	0	2.06203e-05	0	3.7262e-05	0	9.77199e-05	0	0	0	0	0	0	0	0	0	0
ZOTU4742	9.68922e-05	0	0	0	0	0.00016171	0.00101956	0.000150083	7.1664e-05	0	0	0	0	0	0	0	0	0.000296373	0.000658945	0	0	0	0	0	0	0	0	0	5.88616e-05	0	0	0	0	7.86951e-05	0.00160838	0.000735558	0.000248413	4.08051e-05	0	0	0	0	0	0.000176949	0	0	0	0	0
ZOTU1100	0.00459027	0	0	0	0	0	0	0	0	0	0.000794453	0	0	0	0	0	0	0	0	0	0	0	0	0	0	0	0	0	0	0	0	0	0	0	0	0	0	0	0	0	0	0	0	0	0	0	0	0	0
ZOTU4413	0	0	0	0	0	0	0.00025782	0.000507422	0.000429984	0.000168265	0	0	0	0	0	0	0	0	0.000240768	0.000827658	0	0	0	0	0	0	0	0	5.88616e-05	0.000346854	0.000144737	0	0	2.18597e-05	2.06203e-05	0.000161464	0.00172647	0.000295837	1.30293e-05	0	0	6.8675e-05	0	0	2.45563e-05	0	0	0	0
ZOTU4569	0.000218007	0.00375653	0	0	0	0.000279317	0.000105472	0.000100055	0	0	0	0	0	0	0	0	0	0	3.80161e-05	0	0	0	3.24494e-05	8.07474e-06	0	0	0	0	0	0	0	0	0	4.37195e-05	0.000329924	0.000125583	7.4524e-05	0	0.00018241	0	0	0	0	0	0	0	0	0	0
ZOTU6902	0	0	0	0	0	0.000279317	0.00135941	0.000371633	0	7.01105e-06	0	0	0	0	0	0	0	7.40933e-05	2.5344e-05	3.44857e-05	0	0	0	0	0	0	0	0	0	1.92697e-05	0	0	0	1.74878e-05	0.000474266	0.000735558	0.000136627	0.000112214	1.30293e-05	0.000696806	0.000764691	1.14458e-05	0	0.000132712	0	0	0	0	0
ZOTU7356	0	0	0	0	0	0.00174941	0.00131254	0.000393073	0	3.50552e-05	0	0	0	0	0	1.43497e-05	0	0	3.80161e-05	0	0	0	0	0	0	0	0	0	0	0	0	0	0	0.000284177	0.000412405	0.000430571	0.000173889	0.000316239	5.86319e-05	0	0	5.72292e-05	0	0	0	0	0	0	0
ZOTU1412	0	0	0	0	0	0	0.000105472	4.28807e-05	0.000286656	0.000329519	0	0	0	0	0	0	0	0	8.87042e-05	0.0003621	0	0	8.11234e-06	0	0	0	0	0	0	0.00163792	6.48819e-05	0	0	4.37195e-06	0	0.000179404	0.000683136	0.000540667	0	0	0	5.72292e-05	0	0.000870001	0	0	0	0	0
ZOTU3078	0	0	0	0	0	0	0	0	0.00071664	0.00020332	0	0	0	0	0	0	0	0	0	0	0	0	0	0	0	0	0	0	0.000691624	5.7809e-05	0.00117287	0.000622615	0.000351	0	0	0.000269107	1.24207e-05	0.000530466	0	0	0	3.43375e-05	0	0	0.000139153	0	0	0	0
ZOTU6234	0	0	0	0	0	0.000940858	4.68763e-05	0	0	0.000231365	0	0	0	0	0	0	0	0	0	0	0	0	0	0	0	0	0	0	0	9.63484e-05	0	0	0	0.000633932	0.00241257	0.000322928	0	0	0.000547231	0	0	0	0	0	0	0	0	0	0
ZOTU5202	0	0	0	0	0	1.47009e-05	0.000269539	4.28807e-05	0.00035832	0	0	0	0	0	0	0	0	0.00011114	0.000494209	0	0	0	0	0	0	0	0	0	0	0	0	0	0	0.000227341	0.00331986	0.000304987	4.96827e-05	0	3.90879e-05	0	0	0	0	0	0	0	0	0	0
ZOTU5762	0	0	0	0	0	0.00032342	0.00012891	0.000485982	0	0	0	0	0	0	0	0	0	0	5.06881e-05	0	0	0	0	0	0	0	0	0	0	0	0	0	0	3.06036e-05	0.000597987	1.79404e-05	0	1.02013e-05	0.000123779	0.00326563	0.000196075	0	0	0	0	0	0	0	0
ZOTU3046	0	0	0	0	0	0.000147009	0.000152348	1.42936e-05	0	2.10331e-05	0	0	0	0	0	0	0	0	0	0	0	0	0	0	0	0	0	0	0.000323739	0.00121399	0.00170689	0.000130548	0	5.24634e-05	0.000515506	0.000197345	2.48413e-05	5.10064e-05	0	0	0	0	0.000301676	0.000324407	1.63709e-05	0	0	0	0
ZOTU6553	0.00015745	0	0	0	0	0.000455728	7.03144e-05	5.71743e-05	0.000143328	7.01105e-06	0	0	0	0	0	0	0	0.000185233	6.33601e-05	0	0	0	0	0	0	0	0	0	0	0	0	0	0	0.000529006	0.00226823	0.000376749	0.000235993	0.00064268	0	0	0	0	0	0	0	0	0	0	0
ZOTU4499	0.00122326	0	0	0	0	0	0	0	0	0	0	0.00114387	0	0	0	0	0	0.00281554	0	0	0	0	8.11234e-06	0	0	0	0	0	0	0	0	0	0	0	0	0	0	0	0	0	0	0	0	0	0	0	0	0	0
ZOTU7962	0.00245864	0	0	0	0	0.000514532	7.03144e-05	5.71743e-05	0	0	0	0	0	0	0	0	0	0.000240803	1.2672e-05	0	0	0	0	0	0	0	0	0	0	0	0	0	0	0.000192366	0.000556747	0.000843201	3.7262e-05	0	0.000201954	0	0	0	0	0	0	0	0	0	0
ZOTU5072	0	0	0	0	0	0.000529233	5.85954e-05	0	0	0	0	0	0	0	0	0	0	0	0	0	0	0	0	0	0	0	0	0	0.000338454	0.000693708	0	0	0	6.55792e-05	0.000597987	0.000789379	0.000136627	0	0.000130293	0	0.000941158	0	0	0.000899493	0	0	0	0	0
ZOTU8072	0	0	0	0	0	7.35045e-05	0	0	0	0.000140221	0	0	0	0	0	0	0	0	3.80161e-05	0	0	0	0	0	0	0	0	0	0	0	1.99637e-05	0	0	0	0	8.97022e-05	0	6.12076e-05	0	0	0	8.01209e-05	0	0.000589831	0.00102318	0.00171159	0.000116626	0	0
ZOTU7592	4.84461e-05	9.25633e-05	0	0	0	0	0.001043	0.00125783	0.000214992	0.000189298	0	0	0	0	0	0	0	0	0.000139392	0.000551772	0	0	0	0	0	0	0	0	0	0	2.99455e-05	0	0	0	0	5.38213e-05	0.000633454	0.000142818	0	0	0	0	0.000726764	0	0	0	0	0	0
ZOTU1358	0	0	0.00189991	0.000975786	0	0	0	0	0	0	0	0	0	0	0	0	0	0	0	0	0	0	0.00122496	0.000500634	0.000190125	1.24278e-05	0	0.000295121	0	0	0	0	0	0	0	0	0	0	0	0	0	0	1.37125e-05	0	0	0	0	0	0
ZOTU5730	0.000266454	0	0	0	0	0	0	0	0	0	0	0	0	0	0	0	0	0.00455674	5.06881e-05	0	0	0	6.48987e-05	1.61495e-05	0	0	0	0	0	0	0	0	0	0	0	0.000143524	0	0	0	0	0	0	0	0	0	0	0	0	0
ZOTU1942	0	0	0	0	0.000585594	0	0	0	0	0	0	0	0	0	0	0	0	0	0	0	0	0.00431564	0	0	0	1.24278e-05	0	0.000174886	0	0	0	0	0	0	0	0	0	0	0	0	0	0	0	0	0	0	0	0	0
ZOTU4347	0.000193784	0	0	0	0	0.000396925	0	0	0	0	0.00139631	0	0	0	0	0	0	0.00263031	6.33601e-05	0	0	0	0	0	0	0	0	0	0	0	0	0	0	0	0.000247443	0	0	0	0.000149837	0	0	0	0	0	0	0	0	0	0
ZOTU1120	0	0	0	0	0	0	0	0	0	0	0	0	0	0	0	0	0	0	0	0	0	0	0	0	0	0	0	0	0	0	0	0	0	0	0	0	0	0	0	0	0	0	0	0	0	0	0	0	0
ZOTU758	0	0	0	0	0	0	0	0	0	0	0	0	0	0	0	0	0	0	0	0	0	0	0	0	0	0	0	0	2.94308e-05	0.000173427	0.000119782	3.01265e-05	0	0	0	5.38213e-05	0	0	0	0.00437844	0	0	0	0	0.000245563	0	0	0	0
ZOTU2566	0.000121115	0.000740506	0	0	0	0	0.000609392	0.000100055	0.00071664	0	0	0	0	0	0	0	0	1.85233e-05	0.000164736	0.0013277	0	0	0	0	0	0	0	0	0	0	0	0	0	0	0	5.38213e-05	9.93653e-05	0.000234629	0	0	0	0.000160242	0.000699339	0	0	0	0	0	0
ZOTU5553	0	0	0	0	0	0.000264616	1.17191e-05	0	0	0	0	0	0	0	0	0	0	0	0	0	0	0	0	0	0	0	0	0	0	0	0	0	0	0.000240457	0	0	0	0	0.00450814	0	0	0	0	0	0	0	0	0	0
ZOTU2331	0	0	0	0	0	0.00376343	0.000175786	0	0.000214992	0	0	0	0	0	0	0	0	0	0	0	0	0	0	0	0	0	0	0	0	0	0	0	0	0.000183622	0.000391785	0.000287047	0	1.02013e-05	0	0	0	0	0	0	0	0	0	0	0
ZOTU3672	0	0	2.75349e-05	0.00401156	0	0	0	0	0	0	0	0	0	0	0	0	0	0	0	0	0	0	2.4337e-05	0.000645979	0.000156573	0.000136705	1.2306e-05	0	0	0	0	0	0	0	0	0	0	0	0	0	0	0	0	0	0	0	0	0	0
ZOTU5939	0	0	0	0	0	0.00122018	0.000140629	9.29082e-05	0	0	0	0	0	0	0	0	0	0.000203757	2.5344e-05	0	0	0	0	0	0	0	0	0	0	0	0	0	0	0.000751975	0.00113411	0.000179404	2.48413e-05	0	0.00123779	0	0	0	0	0	0	0	0	0	0
ZOTU4668	0	0	0	1.80701e-05	0	0	0	0	0	0	0	0	0	0	0	0	0	0	0	0	0	0	0	0	0	0	0	0	0	0	0	0	0	0.00379048	0.000164962	7.17618e-05	0	0	0.000964169	0	0	0	0	0	0	0	0	0	0
ZOTU983	0.00293099	0.00196697	0	0	0	0	0	0	0	0	0	0	0	0	0	0	0	0	0	0	0	0	0	0	0	0	0	0	0	3.85394e-05	0	5.02109e-05	0	0	0	0	0	0	0	0	0	0	0	0	0	2.26701e-05	0	0	0
ZOTU6352	0	0	0	0	0	0.000220514	0.000585954	0.000100055	7.1664e-05	4.20663e-05	0	0	0	0	0	0	0	0	3.80161e-05	0	0	0	0	0	0	0	0	0	0	0	0	0	0	0.000144274	0.00146404	0.000699677	2.48413e-05	0.000112214	8.46906e-05	0	0.00133331	8.01209e-05	0	0	0	0	0	0	0
ZOTU8222	0.000387569	0.00027769	0	0	0	0.000529233	0.00025782	0.000107202	7.1664e-05	2.80442e-05	0	0	0	0	0	0	0	0	8.87042e-05	0	0	0	8.11234e-06	8.07474e-06	0	0	0	0	0	0	0	0	0	8.7439e-05	0.000329924	0.000161464	2.48413e-05	6.12076e-05	0.00115309	0	0.000901943	1.14458e-05	0.000493651	0	0	0	0	0	0
ZOTU8063	0	0	0	0	0	0.00130838	0.000304696	0.000307312	0	2.10331e-05	0	0	0	0	0	0	0	0.000148187	0	0	0	0	8.11234e-06	0	0	0	0	0	0	5.7809e-05	8.48456e-05	0	1.84737e-05	0.000279805	0.00113411	0.000789379	7.4524e-05	6.12076e-05	0.000267101	0	0.000117645	0	0	0	0	0	0	0	0
ZOTU1421	1.21115e-05	0.00494442	0	0	0	0	0	0	0	0	0	0	0	0	0	0	0	0	0	0	0	0	1.62247e-05	0	0	0	0	0	0	0	0	0	0	0	0	0	0	0	0	0	0	0	0	0	0	0	0	0	0
ZOTU6323	6.05576e-05	0	0	0	0	0.00173471	9.37526e-05	0	0	0	0	0	0	0	0	0	0	0.000592746	3.80161e-05	0	0	0	0	0	0	0	0	0	0	0	0	0	0	0.000896249	0.00103101	0.000179404	0	0	0.000345277	0	0	0	0	0	0	0	0	0	0
ZOTU9101	0	0	0	0	0	0	1.17191e-05	0	0.000214992	0.00060295	0	0	0	0	0	0	0	0	0.000139392	0	0	0	0	0	0	0	0	0	0	0.000712978	0.000149727	0	5.54211e-05	2.62317e-05	0	8.97022e-05	0.000347779	0.00064268	0	0	0	0.00168254	0	0.000191695	1.63709e-05	0	0	0	0
ZOTU9010	0	0	0	0	0	0	0.000222662	0.0032232	0.000286656	2.80442e-05	0	0	0	0	0	0	0	0	0	0	0	0	0	0	0	0	0	0	4.41462e-05	0	0	0	0	0	2.06203e-05	0.000197345	0.000683136	0.000244831	0	0	0	0	0	0	0	0	0	0	0
ZOTU6342	0.00297943	0.000755934	0	0	0	0	0	0	0	0	0	0	0	0	0	0	0	0.000926166	3.80161e-05	0	0	0	1.62247e-05	0	0	0	0	0	0	0	0	0	0	0	0	0	0	0	0.000208469	0	0	0	0	0	0	0	0	0	0
ZOTU9500	0.000532907	0	0	0	0	0.00105847	0.00025782	0.000507422	7.1664e-05	2.10331e-05	0	0	0	0	0	0	0	0.000870596	0	0	0	0	0	0	0	0	0	0	7.3577e-05	0	0	0	3.69474e-05	0	0.000164962	0.000771439	0.000136627	0.000173422	0.000214984	0	1.96075e-05	0	0	0	0	0	0	0	0
ZOTU6458	0	0	0	0	0	0.000602737	0	0	0	0	0	0	0	0	0	0	0	0	0	0	0	0	0	0	0	0	0	0	0	0	0	0	0	0.000279805	0.00391785	7.17618e-05	0	0	2.60586e-05	0	0	0	0	0	0	0	0	0	0
ZOTU3379	0	0	0	0	0	0	0	0	0	0	0	0	0	0	0	0	0	0	0	0	0	0	0	0	0	0	0	0	0	0	0	0	0	0	0	0	0	0	0	0	0	0	0	0	0	0	0	0.00211961	0
ZOTU6653	0	0	0	0	0	0	0.000222662	0.00110061	0.00114662	0.000105166	0	0	0	0	0	0	0	0	0	0	0	0	0	0	0	0	0	0	4.41462e-05	0.000231236	7.48637e-05	0.000130548	0	2.18597e-05	2.06203e-05	0.000179404	0.000198731	0.000540667	0.000169381	0	0	6.8675e-05	0	0.000619323	0	0	0	0	0
ZOTU5701	4.84461e-05	0	0	1.80701e-05	1.50152e-05	0	0	0	0	0	0	0.00315806	0.000622436	3.35554e-05	0	7.17484e-05	0	0	1.2672e-05	0	0	0	0.000373168	8.07474e-06	0	7.45666e-05	9.84482e-05	0.000295121	0	0	0	0	0	0	0	0	0	0	0	0	0	0	0	2.94916e-05	0	0	0	0	0
ZOTU6500	0	0	0	0	0	0	0	2.85872e-05	7.1664e-05	7.71215e-05	0	0	0	0	0	0	0	0	0	1.72429e-05	0	0	0	0	0	0	0	0	0.00185414	0.000385394	0.000783574	0.000241012	1.84737e-05	0	0	0.000251166	8.69446e-05	3.06038e-05	0	0	0	1.14458e-05	0	8.84747e-05	0.000908585	0	0	0	0
ZOTU4557	0	0.00047053	0	0	0	0	0	0	0	0	0	0	0	0	0	0	0	0	0	0	0	0	0.00415352	0.000201868	0	0	0	0	0	0	0	0	0	0	0	0	0	0	0	0	0	0	0	0	0	0	0	0	0
ZOTU8348	0	0	0	0	0	0.000632139	0.000210943	0.000257284	0	0	0	0	0	0	0	0	0	0	1.2672e-05	0	0	0	0	0	0	0	0	0	0	0	0	0	0	0.000218597	0.000515506	0.000448511	0.000360199	0.000132617	0.000358306	0.00163801	3.92149e-05	0	0	0	8.18545e-06	0	0	0	0
ZOTU5265	0	0	0	0	0	0.0015436	7.03144e-05	2.85872e-05	0	0	0	0	0	0	0	0	0	0	0	0	0	0	0	0	0	0	0	0	1.47154e-05	0	0	0	0	0.00101429	0.00082481	0.000322928	0.000211151	4.08051e-05	0.0007557	0	0	0	0	0	0	0	0	0	0
ZOTU829	0	0	0	0	0	0.00016171	0	0	0	0	0	0	0	0	0	0	0	0	0	0	0	0	0	0	0	1.24278e-05	0	0	0	0	0	0	0	9.18109e-05	0	0	0	0	0.00455375	0	0	0	0	0	0	0	0	0	0
ZOTU5513	0	0	0	0	0	0	0	0	0	0	0	0	0	0	0	0	0	0	0	0	0	0	0	0	0	0	0	0	0	0	0	0	0	0.000459055	0.00385599	0.000376749	0	0	0.000117264	0	0	0	0	0	0	0	0	0	0
ZOTU2544	0	0	0	0	0	0	0	6.43211e-05	0	0	0	0	0	0	0	0	0	0	0	0	0	0	0	0	0	0	0	0	0.000618047	0.000520281	0.000519055	0.00158666	0.000184737	0	0	0	0	1.02013e-05	0	0	0	9.15667e-05	0	0	0.000769432	0.000192696	0	0	0
ZOTU1136	0	0	0	0	0	0	0	0	0	0	0	0	0	0	0	0	0	0	0	0	0	0	0	0	0	0	0	0	0	3.85394e-05	0.000124773	0	0	0	0	0	0	0	0	0	0	0	0	0	0	0.00460203	0	0	0
ZOTU6099	0.00239808	0	0	0	0	0.000102906	0.000386729	0	7.1664e-05	0	0	0	0	0	0	0	0	0.00114845	3.80161e-05	0	0	0	8.11234e-05	1.61495e-05	0	0	0	0	0	0	0	0	0	0	0.000536127	0	0	0	0	0	0	0	0	0	0	0	0	0	0
ZOTU8007	0	0	0	1.80701e-05	0	0	0	0	0.000143328	0.00020332	0	0	0	0	0	0	0	0	0	0	0	0	0	0	0	0	0	0	0	0	0	0	0	0	0	7.17618e-05	0.000310517	0.000295837	0	0	0.000450972	0.000583738	0.000315388	0.00237407	0	0	0	0	0
ZOTU2295	0	0	0	0	0	0.000543934	0	0	0	0	0	0	0	0	0	0	0	0	0	0	0	0	0	0	0	0	0	0	0	0	0	0	0	2.62317e-05	0.000206203	0	0	0	0.00398697	0	0	0	0	0	0	0	0	0	0
ZOTU5985	0	0	0	0	0	0.000911456	8.20335e-05	0	0	0	0	0	0	0	0	0	0	0	0	0	0	0	0	0	0	0	0	0	0	0	0	0	0	0.00169194	0.00150528	0.000269107	0	0	0.000273616	0	0	0	0	0	0	0	0	0	0
ZOTU4488	0	0	0	0	0	0	0	0	0	0	0	0	0	0	0	0	0	0	0	0	0	0	0.00437255	0.000355289	0	0	0	0	0	0	0	0	0	0	0	0	0	0	0	0	0	0	0	0	0	0	0	0	0
ZOTU4258	0	0	0	0	0	1.47009e-05	1.17191e-05	0	0	0	0	0	0	0	0	0	0	0.00033342	0	0	0	0	0	0	0	0	0	0	0	0	0	0	0	0	8.2481e-05	0	0	0	0.000631922	0.00365043	0	0	0	0	0	0	0	0	0
ZOTU5782	0	0	0	0	0	0.00111727	0.000234381	0	0	0	0	0	0	0	0	0	3.1503e-05	0.000759456	1.2672e-05	0	0	0	2.4337e-05	0	0	0	0	0	0	0	0	0	0	0.00047217	0.000597987	0.000179404	1.24207e-05	0	0.00112704	0	0.000137252	0	0	0	0	0	0	0	0
ZOTU9260	0	0	0.00198252	0.00234911	0	0	0	0	0	0	0	0	0	0	0	0	0	0	0	0	0.000187824	0	0	8.07474e-06	0	0	0	0	0	0	0	0	0	0	0	0	0	0	0	0	0	0	0	0	0	0	0	0	0
ZOTU5859	0	0.000431962	0	0	0	0.000235215	0.000210943	2.85872e-05	7.1664e-05	0	0	0	0	0	0	0	0	0	0.000114048	0.000465557	0	0	0	0	0	0	0	0	0	0	0	0	0	0.000222969	0.00218575	0.000663796	2.48413e-05	5.10064e-05	0	0	0	0	0	0	0	0	0	0	0
ZOTU5980	0	0	0	0	0	0	0.00103128	0.000278725	0.000143328	1.40221e-05	0	0	0	0	0	0	0	0	0.000202752	0	0	0	0	0	0	0	0	0	0	0	0	0	0	0	2.06203e-05	0.000179404	0.000633454	0.000632479	3.90879e-05	0	0.000843121	0.00068675	0	0	0	0	0	0	0
ZOTU5783	0	0	0	0	0	0.000426326	0.000386729	0.000192963	0	0.000112177	0	0	0	0	0	0	0	0	0.000240768	0	0	0	0	0	0	0	0	0	5.88616e-05	0	0	0	0	0	0.0013197	0.00111231	0.000223572	0.000408051	0.000221498	0	0	0	0	0	0	0	0	0	0
ZOTU1369	0.000302788	0	0	0	0	0.00032342	0.0002461	0	0	0	0	0	0	0	0	0	0	0.000740933	0.000266112	0	0	0	0	0	0	0	0	0	0	0	0	0	0	0.000109299	0.00187644	0.000681737	0	0	0.000149837	0	0	0	0	0	0	0	0	0	0
ZOTU6223	0	0	0	0	0	0.000690943	0.000855492	0.000135789	7.1664e-05	0	0	0	0	0	0	0	0	0	0	0	0	0	8.11234e-06	0	0	0	0	0	0	0	0	0	0	0.000153018	0.00119597	0.0010226	0.000322937	0	1.9544e-05	0	0.000137252	6.8675e-05	0	0	0	0	0	0	0
ZOTU5773	0	0	0.00247814	0.00184315	0	0	0	0	0	0	0	0	0	0	0	0	0	0	0	0	0.00025208	0	0	0	0	0	0	0	0	0	0	0	0	0	2.06203e-05	0	0	0	0	0	0	0	0	0	0	0	0	0	0
ZOTU5605	0	0	0	0	0	0	0	0	0	0	9.62974e-05	0.00213853	0.000189695	0.000704663	0.00152856	0	0	0	0	0	0	0	0	0	0	0	0	0	0	0	0	0	0	0	0	0	0	0	0	0	0	0	0	0	0	0	0	0	0
ZOTU873	0	0	0	0	0	0.000720345	0	0	0	0	0	0	0	0	0	0	0	0	0	0	0	0	0	0	0	0	0	0	0	0	0	0	0	0.000502774	0	0.000107643	0	0	0.00332248	0	0	0	0	0	0	0	0	0	0
ZOTU3091	0	0	0	0	0	0	0	0	0.00121829	0.000946492	0	0	0	0	0	0	0	0	0	0	0	0	0	0	0	0	0	0	0	0.000790057	4.49182e-05	0	0.000203211	0	0	3.58809e-05	0.000149048	0.0008059	0	0	0	0.000400604	0	1.47458e-05	0	0	0	0	0
ZOTU6247	0	0	0	0	0	0.000529233	0	0	0	0	0	0	0	0	0	0	0	0	0	0	0	0	0	0	0	0	0	0	0	0	0	0	0	0.000935597	0.000206203	3.58809e-05	0	0	0.00276221	0	0.000137252	0	0	0	0	0	0	0	0
ZOTU2231	0	0	0.000481861	0.00271052	0	0	0	0	0	0	0.000312966	0	0	0	0	0	0	0	0	0	0	0	3.24494e-05	0.000912446	4.47352e-05	0	0.000110754	0	0	0	0	0	0	0	0	0	0	0	0	0	0	0	0	0	0	0	0	0	0
ZOTU7374	0	7.71361e-06	0	0	0	0.000543934	4.68763e-05	1.42936e-05	0	1.40221e-05	0	0	0	0	0	0	0	0	2.5344e-05	1.72429e-05	0	0.000111611	8.11234e-06	0	0	0	0	0	0	0	0	0	0	0.00113233	0.000123722	0.000161464	0	0	0.00233876	2.08002e-05	1.96075e-05	1.14458e-05	0	0	0	0	0	0	0
ZOTU1704	0	0	0	0	0	0	0	0	0.00150494	0.000322508	0	0	0	0	0	0	0	0	0	0	0	0	0	0	0	0	0	0	0.000676909	0.000346854	0	0	0	0	0	0	7.4524e-05	0.0015812	0	0	0	8.01209e-05	0	0	0	0	0	0	0
ZOTU4301	0.00181673	0	0	0	0	5.88036e-05	0	0	0	0	0	0	0	0	0	0	0	0.00207461	0.000633601	0	0	0	0	0	0	0	0	0	0	0	0	0	0	0	0	0	0	0	0	0	0	0	0	0	0	0	0	0	0
ZOTU5810	0	0	0	0	0	0.00136718	0.000550796	0.00156515	0	0	0	0	0	0	0	0	0	0	3.80161e-05	0	0	0	0	0	0	0	0	0	0	0	0	0	0	0	0.000226823	0.000645856	0	0.000173422	0	0	0	0	0	0	0	0	0	0	0
ZOTU6213	0	0	0	0	0	0.000573335	0.000117191	0	0	0	0	0	0	0	0	0	0	0	0	0	0	0	0	0	0	0	0	0	2.94308e-05	0	0	0	0	1.74878e-05	0.000103101	0	0	0.000275434	0.000605863	0	0.00015686	0	0	0.00268373	0	0	0	0	0
ZOTU4267	0	0	0	0	0	0	0	0	7.1664e-05	2.10331e-05	0	0	0	0	0	0	0	0	0	0	0	0	0	0	0	0	0	0	0.000382601	0.000134888	0.00112296	0.0012151	0.000184737	0	0	0	1.24207e-05	0	0	0	0	0	0	0	0	1.1335e-05	0	0	0
ZOTU5453	0.00138071	0.00256863	0	0	0	0	0	0	0	2.10331e-05	0	0	0	0	0	0	0	0	0	0	0	0	0	0	0	0	0	0	0	0	0	0	0	0	0	0	0	0	0	0	0	8.01209e-05	0	0.000501357	0	0	0	0	0
ZOTU4406	0	0	0	0	0	0	0	0	7.1664e-05	6.30994e-05	0	0	0	0	0	0	0	0	2.5344e-05	0.000620743	0	0	0	0	0	0	0	0	0.000161869	0.000751517	0.000159709	0.000130548	0	0	0	0.000215285	1.24207e-05	0.000255032	0	0	0.000862728	0.00121326	0	0	0	0	0	0	0
ZOTU7935	0	0.00036254	0	0	0	5.88036e-05	4.68763e-05	8.57615e-05	0.000143328	0.000224354	0.00055371	0	0	0	0	0	0	0.000463083	2.5344e-05	0	0	0	0	0	0	0	0	0	0.000117723	0.000462472	0.000139746	0	0.00157026	2.62317e-05	0	0	6.21033e-05	5.10064e-05	0	0	0	0.000125904	0	0	1.63709e-05	0	0	0	0
ZOTU5928	0	0	0	0	0	0.000279317	0.00050392	1.42936e-05	0	0	0	0	0	0	0	0	0	0	2.5344e-05	0	0	0	0	0	0	0	0	0	0	0	0	0	0	0.00020111	0.00119597	0.000592034	0.000621033	0.00016322	0.00037785	0	0.000509794	4.57834e-05	0	0	0	0	0	0	0
ZOTU9391	0.000254342	0	0	0	0	0.000411625	0.00112503	5.00275e-05	0.000143328	9.11436e-05	0	0	0	0	0	0	0	0	0.000202752	0.000275886	0	0	0	0	0	0	0	0	1.47154e-05	0	5.49001e-05	0	0	5.68353e-05	0.000845431	0.000968784	0	3.06038e-05	0	0	0	0	0	0	0	0	0	0	0
ZOTU8520	0	0	0	0	0	0.000455728	0	0	0	0	0	0	0	0	0	0	0	0	0	0	0	0	0	0	0	0	0	0	0	0	0	0	0	0.00169632	8.2481e-05	3.58809e-05	0	0	0.00225407	0	0	0	0	0	0	0	0	0	0
ZOTU4063	0	0	0	0	0	0	2.34381e-05	0	0.000286656	0.00060295	0.00146853	0	0	0	0	0	0	0	8.87042e-05	0	0	0	0	0	0	0	0	0	0	0	0	0.000120506	0	0	0	0	4.96827e-05	0.000285636	3.90879e-05	0	0.00023529	0.00131627	0	0	0	0	0	0	0
ZOTU6402	0.000641911	0	0	0	0	0.000249915	0.000609392	0	0	0	0	0	0	0	0	0	0	9.26166e-05	0	0	0	0	0	0	0	0	0	0	0	0	0	0	0	0.000236085	0.00150528	0.000968784	4.96827e-05	0	0.000156352	0	0	0	0	0	0	0	0	0	0
ZOTU6480	0	0	0	0	0	8.82055e-05	0	0	0	0	0	0	0	0	0	0	0	0	0	0	0	0	0	0	0	0	0	0	0	0	0	0	0	0.00167883	0.000103101	0	0	0	0.00263844	0	0	0	0	0	0	0	0	0	0
ZOTU8110	0	1.54272e-05	0	0	0	0	8.20335e-05	7.14679e-06	0.000214992	0.000161254	0	0	0	0	0	0	0	0	0	0.0002414	0.00143339	0	8.11234e-06	0	0	0	0	0	0.000235446	0	0.0001098	0	0	3.06036e-05	0	0.000502332	0.000732819	0.000438655	0	0	0	3.43375e-05	0	0.000235933	0	0	8.97127e-06	0	0
ZOTU2251	0	0	0	0	0	0.000132308	2.34381e-05	0.000385927	0	9.81547e-05	0	0	0	0	0	0	0	0	0.000443521	6.89715e-05	0	0	0	0	0	0	0	0	8.82924e-05	0.000134888	0.0001098	2.00844e-05	0	1.74878e-05	0.000226823	0.000125583	0.000211151	0.000295837	0.000136808	0.00180442	5.88224e-05	8.01209e-05	0	0	2.45563e-05	0	0	0	0
ZOTU4799	0	0	0	0	0	0	0	0	0.000214992	4.20663e-05	0	0	0	0	0	0	0	0	0	0	0	0	0	0	0	0	0	0	0.00103008	0.00277483	3.99273e-05	0	0	0	0	0	0	0.000326441	0	0	0	4.57834e-05	0	0	0	0	0	0	0
ZOTU1898	0	0	0	0	0	0.000220514	8.20335e-05	0	0.000573312	0.000434685	0	0	0	0	0	0	0	0.00027785	0.000114048	8.62143e-05	0	0	0	0	0	0	0	0	1.47154e-05	0.000501012	0.000304446	0	1.84737e-05	3.49756e-05	0	0.000161464	7.4524e-05	0.00047946	8.46906e-05	0	0.000509794	0.000469279	0	0	1.63709e-05	0	0	0	0
ZOTU6016	0.0003149	3.8568e-05	0	0	0	0.00032342	0.000738301	0.00060033	0	1.40221e-05	0	0	0	0	0	0	0	5.557e-05	0.00012672	0	0	0	0	0	0	0	0	0	0	0	0	0	0	0.000113671	0.00101039	0.000322928	0.000223572	0.00016322	0.000136808	0	0.000274504	0	0	0	0	0	0	0	0
ZOTU4498	2.4223e-05	0.000138845	0	0	0	0	0.000433606	0.00017867	7.1664e-05	0.000287453	0	0	0	0	0	0	0	0	0.000595585	0.000310372	0	0	0	0	0	0	0	0	0	0	0	0	0	0	2.06203e-05	0.000538213	0.000496827	0.000244831	0	4.68004e-05	9.80373e-05	0.000148796	0.000452514	0.000353899	0	0	0	0	0
ZOTU2625	0	0	0	0	0	0.00185231	1.17191e-05	0	0	0	0	0	0	0	0	0	0	0.00214871	0	0	0	0	0	0	0	0	0	0	0	0	0	0	0	0.000109299	8.2481e-05	3.58809e-05	6.21033e-05	0	0.000149837	0	0	0	0	0	0	0	0	0	0
ZOTU5322	0	0	0	0	0	0.000147009	0.000281258	0.000971963	0.000214992	0	0	0	0	0	0	0	0	0.000926166	0	0	0	0	0	0	0	0	0	0	0	0	0	0	0	6.99512e-05	0.00082481	0.000340868	0.000322937	8.16102e-05	0.000267101	0	0	0	0	0	0	0	0	0	0
ZOTU2362	0.000339123	0	0	0	0	0.000793849	8.20335e-05	9.29082e-05	0	0	0	0	0	0	0	0	0	0.00216723	8.87042e-05	0	0	0	0	0	0	0	0	0	0	0	0	0	0	8.3067e-05	0.000144342	3.58809e-05	0.000124207	0	0.000495114	0	0	0	0	0	0	0	0	0	0
ZOTU5937	0	0	0	0	0	0.00108787	0	0	0	0	0	0	0	0	0	0	0	0	0	0	0	0	0	0	0	0	0	0	0	0	0	0	0	0.00150395	0.00101039	0.000125583	0	0	0.000710098	0	0	0	0	0	0	0	0	0	0
ZOTU714	0	0	0	0	0	0	1.17191e-05	0	0	0	0	0	0	0	0	0	0	0	0	0	0	0	0	0	0	0	0	0	0	0	0	0	0	2.62317e-05	0.000123722	0	0	0	0	0.00427444	0	0	0	0	0	0	0	0	0
ZOTU3416	0	0	0	0	0	0.000793849	0.000152348	0	0	0	0	0	0	0	0	0	0	0	0	0	0	0	0	0	0	0	0	0	0	0	0	0	0	0	0.000866051	0.000233226	2.48413e-05	0	0.00132248	0	0.00101959	0	0	0	0	0	0	0	0
ZOTU1260	0.00404525	0	0	0	0	0	0	0	0	0	0	0	0	0	0	0	0	0	0.000164736	0	0	0	0	0	0	0	0	0	0	0	0	0	0	0	0.000144342	3.58809e-05	0	0	0	0	0	0	0	0	0	0	0	0	0
ZOTU4705	0.000181673	0.000840783	0	0	0	0.00129368	0.00108987	7.86147e-05	0	0	7.2223e-05	0	0	0	0	0	0	0.00044456	0.000316801	0	0	0	0	0	0	0	0	0	0	0	0	0	0	0	2.06203e-05	0	0	0	0	0	3.92149e-05	0	0	0	0	0	0	0	0
ZOTU6509	0.000109004	0	0	0	0	0.00133778	0.000164067	3.57339e-05	0.000214992	0	0	0	0	0	0	0	0	0.00011114	0.000316801	0	0	0	0	0	0	0	0	0	0	0	0	0	0	6.99512e-05	0.00076295	0.000269107	0.000422303	0.000122415	0.000136808	0	0	0.000297592	0	0	0	0	0	0	0
ZOTU6493	0.000617688	0	0	0	0	0.00144069	0	0	0	0	0	0	0	0	0	0	0	0.00213018	5.06881e-05	0	0	0	0	0	0	0	0	0	0	0	0	0	0	9.18109e-05	2.06203e-05	1.79404e-05	0	0	0	0	0	0	0	0	0	0	0	0	0
ZOTU6217	0	0	0	0	0	0.00174941	0.000210943	0.000707532	7.1664e-05	0	0	0	0	0	0	0	0	0	0	0	0	0	0	0	0	0	0	0	0	0	0	0	0	0.000730115	0.000164962	0.000107643	0.000149048	0	0.000469055	0	0	0	0	0	0	0	0	0	0
ZOTU5959	0.000496572	0	0	0	0	0.00110257	1.17191e-05	0	0	0	0	0	0	0	0	0	0	0.000463083	0	0	0	0	0	0	0	0	0	0	0	0	0	0	0	0.00013553	0.00103101	8.97022e-05	0	0	0.000905537	0	0.000117645	0	0	0	0	0	0	0	0
ZOTU4356	0	0	0	0	0	0	0.000210943	0.00165805	0.000214992	9.11436e-05	0	0	0	0	0	0	0	9.26166e-05	0.000304129	0	0	0	0	0	0	0	0	0	0	0	0	0	0	0	0	0.00039469	0.000832184	0.000540667	0	0	0	1.14458e-05	0	0	0	0	0	0	0
ZOTU1753	0	0	0	0	0	0	0	0	0	0	0	0	0	0	0	0	0	0	0	0	0	0	0	0	0	0	0	0	2.94308e-05	0.00431641	0	0	0	0	0	0	0	0	0	0	0	0	0	0	0	0	0	0	0
ZOTU1728	0	0	0	0	0	0	0	0	0	0	0	6.21666e-05	2.37119e-05	0.0042112	1.544e-05	1.43497e-05	0	0	0	0	0	1.86019e-05	0	0	0	0	0	0	0	0	0	0	0	0	0	0	0	0	0	0	0	0	0	0	0	0	0	0	0
ZOTU8451	0.000884141	0	0	0	0	0	8.20335e-05	0	0	0	0.000264818	0	0	0	0	0	0	0.00224132	6.33601e-05	0	0	0	0	0	0	0	0	0	0	0	0	0	0	8.3067e-05	0.000309304	0.00041263	0	0	0	0	0	0	0	0	0	0	0	0	0
ZOTU5857	0.000121115	0	0	0	0	0.000396925	0.000175786	2.85872e-05	0	0	0	0	0	0	0	0	0	0	2.5344e-05	0	0	0	0	0	0	0	0	0	0	0	0	0	0	0.000271061	0.00076295	0.000681737	0.000385041	0	0.00147883	0	0	0	0	0	0	0	0	0	0
ZOTU4134	9.68922e-05	0	0	0	0	7.35045e-05	5.85954e-05	0	0.000143328	0.000673061	0	0	0	0	0	0	0	0	0.000304129	6.89715e-05	0	0	0	0	0	0	0	0	0	0.000115618	8.48456e-05	0	1.84737e-05	0	0.000123722	0.000125583	4.96827e-05	0.000907913	0	0	0.000686261	0.000755425	0	0	4.09272e-05	0	0	0	0
ZOTU6022	0	0	0	0	0	0	1.17191e-05	0	0	0	0	0	0	0	0	0	0	0.00229689	0	0	0	0	0	0	0	0	0	0	0	0	0	0	0	0.000262317	0.000103101	0	0	0	0.00122476	0	0.000411757	0	0	0	0	0	0	0	0
ZOTU6208	0.00111426	0	0	0	0	0	0	0	0	0	0	0	0	0	0	0	0	0.0027785	6.33601e-05	0	0	0	0	0	0	0	0	0	0	0	0	0	0	0	0	0	0	0	0.000345277	0	0	0	0	0	0	0	0	0	0
ZOTU2887	0	0	0	0	0	0	4.68763e-05	0	7.1664e-05	0.000427674	0	0	0	0	0	0	0	0	0	0	0	0	0	0	0	0	0	0	0.000132439	7.70787e-05	0	0	0	0	0	0.000287047	9.93653e-05	0.000306038	0	0	0.000254897	0.000251808	0	0.00094373	9.00399e-05	0.000408061	1.79425e-05	0	0
ZOTU2863	0	0	0	0	0	0.000117607	0	0	0.000429984	7.71215e-05	0	0	0	0	0	0	0	0	0	0	0	0	0	0	0	0	0	0	0	0.000134888	0.0001098	0	0	0	0	1.79404e-05	0.000385041	0.000336642	0	0	0	0.000915667	0	0.00176949	0	0	0	0	0
ZOTU8433	0.00087203	0.000185127	0	0	0	0	0	0	0	0	0	0	0	0	0	0	0	0.00311192	3.80161e-05	0	0	0	8.11234e-06	8.07474e-06	0	0	0	0	0	0	0	0	0	0	0	0	0	0	0	0	0	0	0	0	0	0	0	0	0
ZOTU5932	0	0	0	0	0	0.00149949	0.000175786	0	0	0	0	0	0	0	0	0	0	0	0	0	0	0	0	0	0	0	0	0	0	1.92697e-05	0	1.00422e-05	0	0.000555237	0.00101039	0.000376749	0	3.06038e-05	0.000527687	0	0	0	0	0	0	0	0	0	0
ZOTU4718	0	0	0	0	0	0	0	0	0	0	0	0	0	0	0	0	0	0	0	1.72429e-05	9.88548e-06	0.00416682	0	0	0	0	0	0	0	0	0	0	0	0	0	0	0	0	0	0	0	0	0	0	0	0	0	0	0
ZOTU1404	0	0	0	0	0	0	0	0	0	0	0	0	0	0	0	0	0	0	0	0	0	0	0	8.07474e-06	0	0	0	0	0	0	0	0	0	0	0	0	0	0	0	0	0	0	0	0	0	0	0	0	0
ZOTU5845	0	0	0	0	0	0.0016318	0.000281258	0	0	0	0	0	0	0	0	0	0	0	0	0	0	0	0	0	0	0	0	0	0	0	0	0	0	0.000218597	0.000701089	0.000143524	0	0	0.000390879	0	0.000803906	0	0	0	0	0	0	0	0
ZOTU5438	0	0	0	0	0	4.41027e-05	0.00063283	0.000478835	0.000214992	0.000518818	0	0	0	0	0	0	0	0	0	0	0	0	0	0	0	0	0	0	0.000176585	0.000250506	3.49364e-05	0	0	0	2.06203e-05	8.97022e-05	0.000260834	0.000418252	0	0	0.000764691	0.000114458	0	0	0.000114596	0	0	0	0
ZOTU4508	0	0	0.00152819	0.00263824	0	0	0	0	0	0	0	0	0	0	0	0	0	0	0	0	0	0	0	0	0	0	0	0	0	0	0	0	0	0	0	0	0	0	0	0	0	0	0	0	0	0	0	0	0
ZOTU9567	0	0	0	0	0	0	0	0	0	0	0	0	0	0	0	0	0	0	0	0	0	0	0	0	0	0	0	0	0	0	0	0	0	0	0	0	0	0	0	0	0	0	0	0	0	0	0	0.00373341	0
ZOTU7713	0	0	0	0	0	0.000264616	2.34381e-05	0	0.000143328	0	0	0	0	0	0	0	0	0	0	0	0	0	0	0	0	0	0	0	0.00035317	3.85394e-05	0	0	0	0	0.000226823	5.38213e-05	3.7262e-05	7.14089e-05	0.000175896	0	0	8.01209e-05	0.00268766	0	0	0	0	0	0
ZOTU1754	0	0	0	0	0	0	0	0	0	0	0	0	0	0	0	0	0	0	0	0	0	0	0	0	0	0	0	0	0	0	0	0	0	0	0	0	0	0	0	0	0	0	0	0	0	0	0	0.00281812	0
ZOTU6067	0	0	0	0	9.00914e-05	0	0	0	0	0	0	0	0	0	0	0	0	0	0	0	0	0	0	8.07474e-06	0.000156573	0.000509538	0.00284269	0.000524659	0	0	0	0	0	0	0	0	0	0	0	0	0	0	0	0	0	0	0	0	0
ZOTU791	0	0	0	0	0	0.00032342	1.17191e-05	0	0	0	0	0	0	0	0	0	0	0	0	0	0	0	0	0	0	0	0	0	0	0	0	0	0	0.0032265	0.000350544	0.000179404	0	0	3.90879e-05	0	0	0	0	0	0	0	0	0	0
ZOTU6048	0	0	0	0	0	0.000147009	0	0	0	0	0	0	0	0	0	0	0	0	0	0	0	0	0	0	0	0	0	0	0	0	0	0	0	0.000918109	0.000515506	0.00041263	0	0	0.00213681	0	0	0	0	0	0	0	0	0	0
ZOTU8650	0.000121115	0	0	0	0	0.000602737	0.000363291	0	0	0	0	0	0	0	0	0	0	0.00183381	0	0	0	0	3.24494e-05	8.07474e-06	0	0	0	0	0	0	0	0	0	8.7439e-06	6.18608e-05	5.38213e-05	0	0	0.00103583	0	0	0	0	0	0	0	0	0	0
ZOTU6450	0.000254342	0	0	0	0	0.00138189	0.000386729	0.000128642	0	0	0	0	0	0	0	0	0	0.00022228	0	0	0	0	0	0	0	0	0	0	0	0	0	0	0	0.000375988	0.000639228	0.000251166	3.7262e-05	0	0.000410423	0	0	0	0	0	0	0	0	0	0
ZOTU944	0	0	0	0	0	0.00016171	1.17191e-05	0	0	0	0	0	0	0	0	0	0	0	0	0	0	0	0	0	0	0	0	0	0	0	0	0	0	0.00284614	0	0	0	0	0.00106189	0	0	0	0	0	0	0	0	0	0
ZOTU9427	0	0	0	0	0	0	0	3.57339e-05	0.000286656	0.000497785	0	0	0	0	0	0	0	0	0	0.000206914	0	0	0	0	0	0	0	0	0	3.85394e-05	0	0	0	6.99512e-05	6.18608e-05	0.000107643	0.00135385	0.000703888	0	0	0.000411757	0.000297592	0	0	0	0	0	0	0
ZOTU9066	0	0	0	0	0	0	0.000187505	6.43211e-05	0	0	0	0	0	0	0	0	0	0	0	0	0	0	0	0	0	0	0	0	2.94308e-05	1.92697e-05	0	0	0	0	0	0	0	0	1.30293e-05	0	0.000470579	0.000240363	0.00224886	0.000781526	0	0	0	0	0
ZOTU4231	0	0	0	0	0	0	0	8.57615e-05	0.00071664	0.000392619	0	0	0	0	0	0	0	0	0	0	0	0	0	0	0	0	0	0	2.94308e-05	0.000211966	0	0	0	0	0	8.97022e-05	0.000496827	0.00039785	0	0	0	0.00013735	0.00149467	0	0	0	0	0	0
ZOTU8436	0	0	0	0	0	0.000176411	0.000175786	6.43211e-05	0.000143328	0.000238376	0	0	0	0	0	0	0	0.000240803	0.000177408	0.000379343	0	0	0	0	0	0	0	0	2.94308e-05	0.000308315	4.49182e-05	0.000110464	0.00153332	0	0	0	4.96827e-05	0.000193824	0	0	0	0.000183133	0	0	0	0	0	0	0
ZOTU5200	0	0.000161986	0	0	0	0.000147009	0.00050392	4.28807e-05	0	7.01105e-06	0	0	0	0	0	0	0	9.26166e-05	0.000836353	0.000206914	0	0	0	0	0	0	0	0	0	0	0	0	0	8.3067e-05	0.00076295	0.000681737	2.48413e-05	0.000132617	1.9544e-05	0	0.000333327	1.14458e-05	0	0	0	0	0	0	0
ZOTU6186	0	0	0	0	0	8.82055e-05	7.03144e-05	0.000285872	0.000286656	3.50552e-05	0	0	0	0	0	0	0	0	0	0	0	0	0	0	0	0	0	0	1.47154e-05	7.70787e-05	0	0	0	0	2.06203e-05	0.000161464	0.000707978	0.000438655	0	5.20005e-06	0	0.000675304	0.00117928	0	0	0	0	0	0
ZOTU2543	0	0	0	0	0	0	0.00025782	0.000242991	7.1664e-05	7.01105e-06	0	0	0	0	0	0	0	0	6.33601e-05	0	0	0	0	0	0	0	0	0	0.000794632	1.92697e-05	0.000284482	0	0	0	0.000556747	0.000287047	0.000198731	0.000255032	0	0	0	4.57834e-05	0	0.000958476	0	0	0	0	0
ZOTU3529	0	0	0	0	0	0.000764447	0.000562515	0.00120781	0	0	0	0	0	0	0	0	0	0.000129663	2.5344e-05	0	0	0	1.62247e-05	0	0	0	0	0	0	0	0	0	0	0.000104927	0.000350544	0.000269107	6.21033e-05	0	0.000130293	0	0.000411757	0	0	0	0	0	0	0	0
ZOTU1467	0	0	0	0	0	0	0	0	0	0	0.00115557	0	0	0	0	0	0	0	0	0	0	0	0.000259595	0.00184912	2.23676e-05	0.000745666	0	0	0	0	0	0	0	0	0	0	0	0	0	0	0	0	0	0	0	0	0	0	0
ZOTU9613	0	0	0.0012253	0.00137333	0	0	0	0	0	0	0	0	0	0	0	0	0	0	0	6.89715e-05	0.00117637	0	4.8674e-05	0.000129196	0	0	0	0	0	0	0	0	0	0	0	0	0	0	0	0	0	0	0	0	0	0	0	0	0
ZOTU906	0	0	0	0	0	0.000529233	0	0	0	0	0	0	0	0	0	0	0	0	0	0	0	0	0	0	0	0	0	0	0	0	0	0	0	0.000734487	0.000309304	3.58809e-05	0	0	0.00239088	0	0	0	0	0	0	0	0	0	0
ZOTU9375	0	0	0	0	0	0	0	6.43211e-05	0	0.000182287	0	0	0	0	0	0	0	0	0	0	0	0	0	0	0	0	0	0	0.00110366	0.00140669	0.000573955	0.00023097	1.84737e-05	0	0	0.000107643	2.48413e-05	0.000244831	0	0	0	1.14458e-05	0	0	2.45563e-05	0	0	0	0
ZOTU5054	0	0	0	0	0	7.35045e-05	2.34381e-05	4.28807e-05	0.000501648	0.000154243	0	0	0	0	0	0	0	0	0	0	0	0	0	0	0	0	0	0	0.000132439	7.70787e-05	9.98183e-06	1.00422e-05	0	0	0	0.000125583	0.000173889	0.00056107	0	0	0.000294112	0.000286146	0.00126155	0.000235933	1.63709e-05	0	0	0	0
ZOTU1533	0	0	1.37675e-05	7.22804e-05	0	0	0	0	0	0	0.000144446	0	0	0	0	0	0	0	0	0	0	0	0.000746335	0.00145345	0.00079405	6.21388e-05	0.000406099	0.00028419	0	0	0	0	0	0	0	0	0	0	0	0	0	0	0	0	0	0	0	0	0
ZOTU1364	0	5.39953e-05	0	0	0	0.000661541	0.000210943	0.000335899	7.1664e-05	7.01105e-06	0	0	0	0	0	0	0	0	0.00012672	0	0	0	0	0	0	0	0	0	0	0	0	0	0	0	0.000103101	8.97022e-05	7.4524e-05	0.000102013	3.25733e-05	0.00187722	0	0.00013735	0	7.37289e-05	0	0	0	0	0
ZOTU6325	8.47807e-05	0.000223695	0	0	0	0.000279317	4.68763e-05	0	0	0	0	0	0	0	0	0	0	0	0.000215424	0	0	0	8.11234e-06	0	0	0	0	0.000786988	0	0	0	0	0.000129316	0.000319152	6.18608e-05	8.97022e-05	1.24207e-05	0	0.00130293	0	0	0	0	0.000353899	3.27418e-05	0	0	0	0
ZOTU1973	8.47807e-05	0	0	0	0	0	0	0	0	0	0	0	0	0	0	0	0	0.00385285	0	0	0	0	0	0	0	0	0	0	0	0	0	0	0	0	0	0	0	0	0	0	0	0	0	0	0	0	0	0	0
ZOTU7061	1.21115e-05	0.00333999	0	0	0	0	0	0	0	0	0.000264818	0.000124333	0	0	0	0	0	0	0	0	0	0	0	0.000193794	0	0	0	0	0	0	0	0	0	0	0	0	0	0	0	0	0	0	0	0	0	0	0	0	0
ZOTU6429	0	0	0	0	0	0.000426326	2.34381e-05	0	0	0	0	0	0	0	0	0	0	0	0	0	0	0	0	0	0	0	0	0	0	0	0	0	0	0.00180124	0.000866051	0.000125583	0	0	0.000332248	0	0.000352934	0	0	0	0	0	0	0	0
ZOTU1686	0	0	0	0	0	0	0	0	0	0	0	0	0	0	0	0	0	0	0	0	0	0	0	0	0	0	0	0	0	0	0	0	0	0	0	0	0	0	0	0	0	0	0	0	0	0	0	0.00308307	0
ZOTU4987	0	0	0	0	0	0.00144069	4.68763e-05	0.000128642	0	0	0	0	0	0	0	0	0	0	8.87042e-05	0	0	0	0	0	0	0	0	0	0	0	0	0	0	0.00124163	0.000474266	0.000358809	2.48413e-05	0	6.51466e-06	0	0	6.8675e-05	0	0	0	0	0	0	0
ZOTU1925	0	0	0	0	0	0	0	0	0	0	0	0	0	0	0	0	0	0	0	0	0	0	0	0	0	0	0	0	0	0	0.000134755	0.00265113	0.000110842	0	0	0	0	0	0	0	0	0	0	0	0.000286491	0	0	0	0
ZOTU9644	0	0	0	0	0	0.000191112	1.17191e-05	0.000150083	0	0	0	0	0	0	0	0	0	0	0	0	0	0	0	8.07474e-06	0	0	0	0	0	0	0	0	0	0.00153018	0.000164962	0.000107643	7.4524e-05	0.000214227	0.0010684	0	0.000333327	0	0	0	0	0	0	0	0
ZOTU4827	0.000278565	0	0	0	0	0.000102906	0	0	0	0	0	0	0	0	0	0	0	0.00342681	0	0	0	0	0	0	0	0	0	0	0	0	0	0	0	0	4.12405e-05	0	0	0	0	0	0	0	0	0	0	0	0	0	0
ZOTU5771	0	0	0	0	0	1.47009e-05	0	0	0	2.80442e-05	0	0	0	0	0	0	0	0	0	0	0	0	0	0	0	0	0	0	0.000691624	0.00132961	3.49364e-05	0.000421771	0.000166263	0.00017925	0.000474266	0.000251166	0.000136627	8.16102e-05	3.90879e-05	0	0	0	0	0	0	0	0	0	0
ZOTU4115	0	0	0	0	0	0.00122018	0.00012891	3.57339e-05	7.1664e-05	9.11436e-05	0	0	0	0	0	0	0	0	0	0	0	0	0	0	0	0	0	0	0	3.85394e-05	0	0	0	4.80914e-05	0.000288684	0.0010226	1.24207e-05	0.000122415	0	0	0.000725476	3.43375e-05	0	0	0	0	0	0	0
ZOTU923	0	0	0	0	0	0	0	0	0	1.40221e-05	0	0	0	0	0	0	0	0	0	0	0	0	0	0	0	0	0	0	0	0	0	0	0	0	0	0	0	0	0	0.00382203	0	0	0	0	0	0	0	0	0
ZOTU4271	0	0	0	0	0	0.000176411	2.34381e-05	0	0	0	0	0	0	0	0	0	0	0.00318601	0.000114048	0	0	0	0	0	0	0	0	0	0	0	0	0	0	0	0.000247443	5.38213e-05	0	0	6.51466e-06	0	0	0	0	0	0	0	0	0	0
ZOTU1605	0	0	0	0	0	0	0	0	0.000143328	0.000259409	0	0	0	0	0	0	0	0	0	0	0	0	0	0	0	0	0	0	0.000941786	0.000790057	0.000144737	0.000763205	7.38948e-05	4.37195e-05	0	0.000538213	0	9.18114e-05	0	0	0	0	0	0	0	0	0	0	0
ZOTU1095	0	0.00342484	0	0	0	0	0	2.85872e-05	7.1664e-05	7.01105e-05	0	0	0	0	0	0	0	0	0	0.000103457	0	0	3.24494e-05	0	0	0	0	0	0	0	2.99455e-05	0	0	0	0	0	2.48413e-05	0	0	0	0	0	0	0	0	0	0	0	0
ZOTU6072	0	0	0	0	0	7.35045e-05	0.000105472	7.14679e-05	0.000286656	0.000638005	0	0	0	0	0	0	0	0	0	0	0	0	0	0	0	0	0	0	1.47154e-05	0.000134888	0.000369328	0	0	0.000109299	6.18608e-05	0.000143524	0.000471985	0.000367246	0	0	0	0.000423496	0	0	0.000343789	0	0	0	0
ZOTU1755	0	0	0	0	0	0.000882055	0.000597673	0	0	0	0	0	0	0	0	0	0	0	0.000215424	0	0	0	0	0	0	0	0	0	0	0	0	0	0	0	0	0	0	0	1.9544e-05	0	0.000294112	0	0.0017552	0	0	0	0	0	0
ZOTU3591	0	0	0	0	0	0	0.000539077	0.000235844	0.000143328	0.000231365	0	0	0	0	0	0	0	0	5.06881e-05	0.000431072	9.88548e-06	0	0	0	0	0	0	0	0.000279593	0	0	0	0	0	0	0.000179404	0.0011427	0.000193824	0	0	0	0.000309038	0	0	0	0	0	0	0
ZOTU5828	0.000884141	0	0	0	0	0.00102906	0.000234381	0	0	0	0	0	0	0	0	0	0	0.000240803	0	0	0	0	0	0	0	0	0	0	0	0	0	0	0	0.000354128	0.000742329	0.000215285	0	0	4.56026e-05	0	0	0	0	0	0	0	0	0	0
ZOTU1623	0	0	0	0	0	0.000926157	0.000199224	0	0	0	0	0	0	0	0	0	0	0	5.06881e-05	0	0	0	0	0	0	0	0	0	0	0	0	0	0	0.000266689	0.00185582	0.00039469	0	0	3.90879e-05	0	0	0	0	0	0	0	0	0	0
ZOTU4433	0	0	0	0	0	0	0	0	0	0	0	0	0	0	0	0	0	0	0	0	0	0	0.00193074	8.07474e-05	2.23676e-05	0	0	0	0	0	0	0	0	0	0	0	0	0	0	0	0.000274504	0	0.00141239	0	0	0	0	0	0
ZOTU3933	0.00015745	0	0	0	0	0.00186702	0.000187505	0	0	0	0	0	0	0	0	0	0	0	8.87042e-05	0	0	0	0	0	0	0	0	0	0	0	0	0	0	8.3067e-05	0.000618608	0.000627915	0	3.06038e-05	4.56026e-05	0	0	0	0	0	0	0	0	0	0
ZOTU5600	0.000302788	0.000177413	0	0	0	2.94018e-05	0.000164067	0	0	0	0	0	0	0	0	0	0	0.000648316	0	0	0	0	0	0	0	0	0	0	0	0	0	0	0	2.62317e-05	0.000226823	0.000179404	0.000111786	2.04025e-05	7.16612e-05	0.00172642	0	0	0	0	0	0	0	0	0
ZOTU1914	0	0	0	0	0	0	0	0	0	7.01105e-06	0	0	0	0	0	0	0	0	0	0	0	0	0	0	0	0	0	0	0	0	0	0	0	0	0	0	0	0	0	0	0	0	0	0	0	0	0	0.00367319	0
ZOTU2755	0	0	0	0	0	0	0	0	0	0	0	0	0	0	0	0	0	0	0	0	0	0	0	0	0	0	0	1.09304e-05	0	0	0	0	0	0	0	0	0	0	0	0	0	0	0	0	0	0	0	4.8173e-05	0
ZOTU6615	0	0	0	0	0	0.000382224	0	0	0	0	0	0	0	0	0	0	0	0	0	0	0	0	0	0	0	0	0	0	0	0	0	0	0	0.00111047	2.06203e-05	0	0	0	0.00153094	0	0.000627439	0	0	0	0	0	0	0	0
ZOTU6431	0	0	0	0	0	0.00196992	8.20335e-05	0	0	0	0	0	0	0	0	0	0	0	6.33601e-05	0	0	0	0	0	0	0	0	0	0	0	0	0	0	0.00118917	0.000164962	0.000197345	0	0	0	0	0	0	0	0	0	0	0	0	0
ZOTU7226	0	3.08544e-05	0	0	0	0	0	0	0	3.50552e-05	0.000288892	0	0	0	0	0	0	0	0	0.00125873	0.000874865	0	2.4337e-05	0	0	0	0	0	1.47154e-05	0	0.000259528	8.03374e-05	0.000387948	0	0	0	1.24207e-05	1.02013e-05	0	5.20005e-06	0	3.43375e-05	1.37125e-05	8.84747e-05	0.000139153	0	0	0	0
ZOTU4517	0	0	0.00097749	0.000451753	0	0	0	0	0	0	0	0	0	0	0	0	0	0	0	3.44857e-05	0	0	0	0	0	0	0	0	0	0	0	0	0	0	0	0	0	0	0	0	0	0	0	0	0	0	0	0.000734639	0
ZOTU5239	0	0	0	0	0	0	1.17191e-05	0	0	7.01105e-05	0	0	0	0	0	0	0	0	0	0	0	0	0	0	0	0	0	0	0.00264877	0.000770787	1.99637e-05	0	0	0	0	0	0	8.16102e-05	0	0	0	0	4.11376e-05	1.47458e-05	0	0	0	0	0
ZOTU8826	0	0	0.00341433	0.000216841	0	0	0	0	0	0	0	0	0	0	0	0	0	0	0	0	0	0	8.11234e-06	1.61495e-05	0	0	0	0	0	0	0	0	0	0	0	0	0	0	0	0	0	0	0	0	0	0	0	0	0
ZOTU9231	0	0	0	0	0	0.000852653	0.000234381	2.85872e-05	0	0	0	0	0	0	0	0	0	0.00116697	2.5344e-05	0	0	0	0	0	0	0	0	0	0	0	0	0	0	0.000153018	0.000577367	7.17618e-05	4.96827e-05	1.02013e-05	0.000482085	0	0	0	0	0	0	0	0	0	0
ZOTU5884	0.000193784	0	0	0	0	0.00032342	7.03144e-05	0	0	0	0	0	0	0	0	0	0	0.000185233	3.80161e-05	0	0	0	0	0	0	0	0	0	0	0	0	0	0	0.000349756	0.00134032	0.000627915	0	1.02013e-05	1.9544e-05	0	0.000490186	0	0	0	0	0	0	0	0
ZOTU8135	0	0	0	0	0	0.00201402	0	0	0	0	0	0	0	0	0	0	0	0	0	0	0	0	0	0	0	0	0	0	0	0	0	0	0	0.000441567	0.000866051	0.000143524	0	0	0.000175896	0	0	0	0	0	0	0	0	0	0
ZOTU1793	0.00226485	0.000293117	0	0	0	0	0.000105472	0.000100055	0	0	0	0	0	0	0	0	0	0	0	0.000655229	0	0	4.05617e-05	8.07474e-06	0	0	0	0	0	0	0	0	0	0	0	0	0.000161469	0	0	0	0	0	0	0	0	0	0	0	0
ZOTU1264	0	0	0	0	0	0	0	0	0	0	0	0	0	0	0	0	0	0	0	0	0	0	0	8.07474e-06	0	0	0	0	0	0	0	0	0	0	0	0	0	0	0	0	0	0	0	0	0	0	0.00252093	0	0
ZOTU1004	0	0	0	0	0	0	4.68763e-05	7.14679e-05	7.1664e-05	2.80442e-05	0	0	0	0	0	0	0	0	0	0	0	0	0	0	0	0	0	0	0	0	0	0	0	0	0	0.000143524	0.00018631	8.16102e-05	0	0.00247002	0.000392149	0.000114458	0	0	0	0	0	0	0
ZOTU1578	0.0016835	0	0	0	0	0.000176411	0	0	0	0	0	0	0	0	0	0	0	0.00146334	2.5344e-05	0	0	0	8.11234e-06	1.61495e-05	0	0	0	0	0	0	0	0	0	0	0	3.58809e-05	0	0	0.00019544	0	0	0	0	0	0	0	0	0	0
ZOTU5834	0.00284621	0	0	0	0	0.00032342	1.17191e-05	0	0	0	0.000337041	0	0	0	0	0	0	0	0	0	0	0	4.05617e-05	0	0	0	0	0	0	0	0	0	0	0	0	3.58809e-05	0	0	0	0	0	0	0	0	0	0	0	0	0
ZOTU9591	0	0	0	0	0	0.000220514	2.34381e-05	3.57339e-05	0.00035832	0.000988558	0	0	0	0	0	0	0	0	0	0	0	0	0	0	0	0	0	0	0	0	0	0	0	8.3067e-05	0	0	1.24207e-05	0.000591674	0	0	0	0.000423496	0	0	0.000769432	0	0	0	0
ZOTU8573	0	0	0	0	0	1.47009e-05	2.34381e-05	0	0.00035832	0	0	0	0	0	0	0	0	0	0	0	0	0	0	0	0	0	0	0	0.000117723	1.92697e-05	0	0	0	0	0	0	0.000198731	0.000265233	5.86319e-05	0	0	0	0.00253682	0	0	0	0	0	0
ZOTU1737	0	0	0	0	0	0.000676242	0.00025782	0	0	0	0	0	0	0	0	0	0	0	0	0	0	0	0	0	0	0	0	0	0	0	0	0	0	0.00013553	0.00082481	0.000592034	8.69446e-05	3.06038e-05	0.000143322	0	0.000843121	0	0	0	0	0	0	0	0
ZOTU5312	0	0	0	0	0	5.88036e-05	0.000914087	0.000121495	0	0	0	0	0	0	0	0	0	0	0	0	0	0	0	0	0	0	0	0	0	0	0	0	0	9.18109e-05	0.00134032	0.000843201	8.69446e-05	2.04025e-05	0.000110749	0	0	0	0	0	0	0	0	0	0
ZOTU5756	0	0	0	0	0	0	0	0	0	0	0	0	0	0	0	0	0	0	0	0	0	0	0	0	0	0	0	0	0	0	0	0	0	0	0	0	0	0	0	0	0	0	0	0	0	0	0	7.22596e-05	0
ZOTU6332	0	0	0	0	0	7.35045e-05	1.17191e-05	0	0	0	0	0	0	0	0	1.43497e-05	0	0	0	0	0	0	0	0	0	0	0	0	0	0	0	0	0	0.00227341	0.000144342	0.00041263	0	0	0.000651466	0	0	0	0	0	0	0	0	0	0
ZOTU2614	0	0	0	0	0	0.00207283	0.00037501	0.000836174	0	0	0	0	0	0	0	0	0	0	5.06881e-05	0	0	0	0	0	0	0	0	0	0	0	0	0	0	0	0	0.000233226	0	0	0	0	0	0	0	0	0	0	0	0	0
ZOTU5131	0	0	0	0	0	0.000661541	1.17191e-05	0	0	0	0	0	0	0	0	0	0	1.85233e-05	0	0	0	0	0	0	0	0	0	0	0	0	0	0	0	0.000174878	0.000474266	0.000663796	0	0	0.00114658	0	0.000411757	0	0	0	0	0	0	0	0
ZOTU2313	0.000835695	0	0	0	0	0	0	0	0	0	0	0	0	0	0	0	0	0.00244508	5.06881e-05	0	0	0	0	0	0	0	0	0	0	0	0	0	0	0.000104927	4.12405e-05	5.38213e-05	0	0	0	0	0	0	0	0	0	0	0	0	0
ZOTU8886	0	0	0	0	0	0.000617438	0.0002461	5.00275e-05	0.000143328	2.10331e-05	0	0	0	0	0	0	0	0	0	0	0	0	0	0	0	0	0	0	0.000206016	7.70787e-05	0.000339382	0	0	0	0.000494886	0.000574094	1.24207e-05	0.000663083	9.77199e-05	0	0	0	0	0	0	0	0	0	0
ZOTU4999	0	0	0	0	0	0	2.34381e-05	0.000621771	7.1664e-05	0.000112177	0	0	0	0	0	0	0	0	0	0	0	0	0	0	0	0	0	0	0.000161869	0.000423933	0.000239564	0.000130548	0.000424895	0	4.12405e-05	0.000125583	2.48413e-05	5.10064e-05	0.000410423	0	0	0.000228917	0	0	0.000442014	0	0	0	0
ZOTU5912	0	0	0	0	0	0.000573335	0.00037501	2.85872e-05	0.000143328	0	0	0	0	0	0	0	0	0	2.5344e-05	0	0	0	0	0	0	0	0	0	0	0	0	0	0	6.55792e-05	0.00150528	0.00082526	0	0	0	0	0	0	0	0	0	0	0	0	0
ZOTU2483	0	0	0	0	0	0	0	0	0	0	0	0	0	0	0	0	0	0	0	0	0	0	0	0	0.0011743	0.0013422	0.000258427	0.000754197	0	0	0	0	0	0	0	0	0	0	0	0	0	0	0	0	0	0	0	0	0
ZOTU6341	0.000327011	0	0	0	0	0.00120547	2.34381e-05	0	0	0	0	0	0	0	0	0	0	0.000203757	0	0	0	0	0	0	0	0	0	0	0	0	0	0	0	0.000253573	0.000288684	8.97022e-05	0	0	0.00113355	0	0	0	0	0	0	0	0	0	0
ZOTU891	0	0	0	0	0	0	0	0	0	0	0	0	0	0	0	0	0	0	0	0	0	0	0	0	0	0	0	0	0	0	0	0	0	0.00252699	0.000907291	8.97022e-05	0	0	0	0	0	0	0	0	0	0	0	0	0
ZOTU4285	0	0	0	0	0	0.000102906	0.000539077	0.00130072	0	0	0	0	0	0	0	0	0	0	0.000101376	0	0	0	0	0	0	0	0	0	0	1.92697e-05	0	0	0	0	4.12405e-05	0.000125583	0.000658295	0.000612076	0	0	0	0	0	0	0	0	0	0	0
ZOTU9596	0	0	0	0	0	0.000176411	0.000187505	0	0	0	0	0	0	0	0	0	0	0.000203757	0.000101376	0	0	0	0	0	0	0	0	0	0	0	0	0	0	0	0.000536127	0.00082526	1.24207e-05	0	0.00095114	0	0.000509794	0	0	0	0	0	0	0	0
ZOTU6433	0	0	0	0	0	0.00139659	0.000421887	0.000271578	0	0	0	0	0	0	0	0	0	0	0	0	0	0	0	0	0	0	0	0	0.000323739	3.85394e-05	0	0	0	0.000459055	0.000350544	8.97022e-05	0.000149048	0	0	0	0	0	0	0	0	0	0	0	0
ZOTU4421	0	0	0	0	0	0.000867354	0.000351572	0.000428807	0	0	0	0	0	0	0	0	0	0	0.00012672	0	0	0	0	0	0	0	0	0	0	0	0	0	0	0.000126786	0.000412405	0.000251166	0	1.02013e-05	9.12052e-05	0	0	9.15667e-05	0.000740477	0	0	0	0	0	0
ZOTU6090	0	0	0	0	0	0.000294018	0.000269539	0.000500275	0.000286656	0	0	0	0	0	0	0	0	0	3.80161e-05	0	0	0	0	0	0	0	0	0	0	0.000192697	0.000124773	0	0.000110842	3.49756e-05	0.000144342	0.000161464	0.000707978	0.00039785	0.000234528	0	0	0	0	0	0	0	0	0	0
ZOTU1635	0	0	0	0	0	0	0	0.000192963	0	0	0	0	0	0	0	0	0	0	0	0	0	0	0	0	0	0	0	0	0.000161869	0.000115618	0.000384301	0.000271139	0.00230921	0	0	0	0	6.12076e-05	0	0	0	0	0	0	0	0	0	0	0
ZOTU2877	0.000968922	0	0	0	0	0	0	0	0	0	0	0	0	0	0	0	0	0.0024636	6.33601e-05	0	0	0	0	0	0	0	0	0	0	0	0	0	0	0	0	0	0	0	0	0	0	0	0	0	0	0	0	0	0
ZOTU3617	0.000230119	0	0	0	0	0.000617438	0.000117191	0	0	0	0	0	0	0	0	0	0	0.000148187	0	0	0	0	0	0	0	0	0	0	0	0	0	0	0	2.18597e-05	0.00115473	0.000340868	3.7262e-05	2.04025e-05	0.000807818	0	0	0	0	0	0	0	0	0	0
ZOTU8386	0.00155027	0	0	0	0	0	0	0	0	0	0	0	0	0	0	0	0	0.00168562	0.00025344	0	0	0	0	0	0	0	0	0	0	0	0	0	0	0	0	0	0	0	0	0	0	0	0	0	0	0	0	0	0
ZOTU1591	0	0	0	0	0	0	1.17191e-05	0.000164376	0	0	0	0	0	0	0	0	0	0	2.5344e-05	0	0	0	0	0	0	0	0	0	0	0	0	0	0	0.000196738	0.00224761	0.000717618	0	0.000122415	0	0	0	0	0	0	0	0	0	0	0
ZOTU1157	0	0	0	0	0	0	0	0	0	0	0	0	0	0	0	0	0	0	0	0	0	0	0	0	0	0	0	0	0	0	0	0	0	0	0	0	0	0	0	0	0	0	0	0	0	0	0.00263755	0	0
ZOTU7770	0	0	0	0	0	0.000220514	0	0.000207257	0.00035832	9.81547e-05	0.000794453	0	0	0	0	0	0	0	0.000304129	0.000896629	0	0	0	0	0	0	0	0	5.88616e-05	5.7809e-05	0	0	0.000351	0	0	0	0	0	0	0	0	1.14458e-05	0	0	2.45563e-05	5.66752e-05	0	0	0
ZOTU2707	0	0	0	0	0	0	8.20335e-05	0	0.00035832	0.000574906	0	0	0	0	0	0	0	0	0	0	0	0	0	0	0	0	0	0	2.94308e-05	0.000558821	3.99273e-05	0.000120506	0	0	0	0.000107643	0.000136627	0.000357044	0	0	0	0.000995788	0	0	8.18545e-06	0	0	0	0
ZOTU6219	0	0	0	0	0	0.000411625	0.000445325	0.000521716	0	0	0	0	0	0	0	0	0	0	0.00019008	0	0	0	0	0	0	0	0	0	0.000161869	0	0.000299455	0	0	0.000214225	0.000556747	0.000251166	0.000347779	2.04025e-05	0	0	0	2.28917e-05	0	0	0	0	0	0	0
ZOTU4558	0.00226485	0	0	0	0	0	0	0	0	0	0	0	0	0	0	0	0	0.00027785	0	0	0	0	8.11234e-06	0	0	0	0	0	0	0	0	0	0	0	0	0	0	0	0.000123779	0	0	0	0	0.000766781	0	0	0	0	0
ZOTU5867	0	0	0	0	0	0.000117607	0	0.000214404	0.000788304	0.000147232	0	0	0	0	0	0	0	0	0	0	0	0	0	0	0	0	0	0	0	0	0	0	0	0	0.000123722	0.000251166	0.000496827	0.000683485	0	0	0.000490186	0.000125904	0	0	0	0	0	0	0
ZOTU1905	0.000290677	0	0	0	0	4.41027e-05	0	0	0	0	0	0	0	0	0	0	0	0.00307487	1.2672e-05	0	0	0	0	0	0	0	0	0	0	0	0	0	0	0	0	0	0	0	0	0	0	0	0	0	0	0	0	0	0
ZOTU1691	0	0	0	0	0	0	0	0	7.1664e-05	0.000553873	0	0	0	0	0	0	0	0	0	0.000569015	0	0	0	0	0	0	0	0	7.3577e-05	9.63484e-05	0	0	0	6.12073e-05	0	0.000287047	0.000136627	0.000153019	4.56026e-05	0	0	0.000206025	0	0.00116492	0	0	0	0	0
ZOTU6424	0.00140494	0.000401108	0	0	0	0.000705644	0	0	0	0	0	0	0	0	0	0	0	0.00050013	3.80161e-05	0	0	0	1.62247e-05	0	0	0	0	0	0	0	0	0	0	7.43231e-05	0	0.000161464	0	0	0.000110749	0	0	0	0	0	0	0	0	0	0
ZOTU4387	7.26691e-05	0	0	0	0	0.000749746	0.000152348	0.000207257	7.1664e-05	0	0	0	0	0	0	0	0	0	5.06881e-05	0	0	0	0	0	0	0	0	0	0	0	0	0	0	7.43231e-05	0.00115473	0.000269107	0.000136627	0	0.000273616	0	0.000137252	5.72292e-05	0	0	0	0	0	0	0
ZOTU1270	0	0	0	0	0	0	0	0	0	0	0	0	0	0	0	0	0	0	0	0	0	0	0	0	0	0	0	0	0	0	0	0	0	0	0	0	0	0	0	0	0	0	0	0	0	0	0.00261961	0.000433557	0
ZOTU2670	0	0	0	0	0	0	0	0	0	0	0	0	0	0	0	0	0	0	0	0	0	0	0	0	0	0	0	0	0	0	0	0	0	0	0	0	0	0	0	0	0	0	0	0	0	0	0	0.00281812	0
ZOTU1630	0.000738803	0.000617089	0	0	0	0	0	0	0	0	0.000192595	0	0	0	0	0	0	0.00183381	0	0	0	0	8.11234e-06	0	0	0	0	0	0	0	0	0	0	0	0	0	0	0	0	0	0	0	0	0	0	0	0	0	0
ZOTU2563	0	0	0	0	0	0.00016171	1.17191e-05	0	0	0	0.000361115	0	0	0	0	0	0	0.00231542	0	0	0	0	0	0	0	0	0	0	0	0	0	0	0	0.000187994	0	0.000251166	0	0	9.12052e-05	0	0	0	0	0	0	0	0	0	0
ZOTU9121	1.21115e-05	0	0	0	0	0.00110257	0.000527358	2.14404e-05	0	0	0	0	0	0	0	0	0	0	5.06881e-05	0	0	0	0	0	0	0	0	0	0	0	0	0	0	0.000109299	0.000989772	0.00039469	0	0	0.000143322	1.56001e-05	0	0	0	0	0	0	0	0	0
ZOTU4726	0	0	0	0	0	0.00148479	8.20335e-05	0	0	0	0	0	0	0	0	0	0	0.000148187	0	0	0	0	0	0	0	0	0	0	0	0	0	0	0	0.000227341	0.000350544	0.000304987	2.48413e-05	1.02013e-05	0.000514658	0	0.000215682	0	0	0	0	0	0	0	0
ZOTU6030	0	0	0	0	0	0.00122018	0.00012891	1.42936e-05	0	0	0	0	0	0	0	0	0	0	0	0	0	0	0	0	0	0	0	0	0	0	0	0	0	0.000647048	0.000453646	0.000179404	0	0	0.000260586	0	0.000450972	0	0	0	0	0	0	0	0
ZOTU1167	0	0	0	0	0	0	0	0	0	0	0	0	0	0	0	0	0	0	0	0	0	0	0	0	0	0	0	0	0	0	4.99092e-06	0	0	0	0	0	0	0	0	0	0	0	0	0	0	0	1.79425e-05	0	0
ZOTU9637	0.000290677	0	0	0	0	0.00127898	0.000855492	2.85872e-05	0	0	0	0	0	0	0	0	0	0.000148187	0	0	0	0	0	0	0	0	0	0	0	0	0	0	0	0.00013553	0.000144342	0.000125583	4.96827e-05	0	5.86319e-05	0	0.00023529	0	0	0	0	0	0	0	0
ZOTU6385	0	0	0	0	0	2.94018e-05	0	0	0	0	0	0	0	0	0	0	0	0	0	0	0	0	0	0	0	0	0	0	0	0	0	0	0	0.0011061	0.000474266	0.000143524	0	0	0.00159609	0	0	0	0	0	0	0	0	0	0
ZOTU1444	0	0.00308544	0	0	0	0	0	0	0	0	0	0	0	0	0	0	0	0	0	0	0	0	8.11234e-06	0	0	0	0	0	0	0	0	0	0	0	0	0	0	0	0	0	0	0	0	0	0	0	0.000251195	0	0
ZOTU8405	0.000133227	0	0	0	0	0.000102906	1.17191e-05	0.000242991	0	0	0	0	0	0	0	0	0	0.00240803	0.000177408	0	0	0	0	0	0	1.24278e-05	0	0	0	0	0	0	0	1.74878e-05	0.000144342	3.58809e-05	2.48413e-05	2.04025e-05	0	0	0	0	0	0	0	0	0	0	0
ZOTU1593	0	0	0	0	0	0	0	0	0.000214992	0.00026642	0	0	0	0	0	0	0	0	0	0	0	0	0	0	0	0	0	0	1.47154e-05	0.000674439	0.000344373	0.000190801	7.38948e-05	7.86951e-05	0	1.79404e-05	4.96827e-05	0.000306038	0	0	3.92149e-05	0.000869884	0	0	2.45563e-05	0	0	0	0
ZOTU5236	0	0	0	0	0	0	0.000105472	3.57339e-05	7.1664e-05	0.000238376	0	0	0	0	0	0	0	0	5.06881e-05	0.000534529	0	0	0	0	0	0	0	0	0	0.000154157	0	0	0	0.000292921	6.18608e-05	0.000538213	0.000298096	0.000102013	8.46906e-05	0	0.000117645	0.00013735	0.000507364	0	0	0	0	0	0
ZOTU6176	0	0	0	0	0	0.00111727	2.34381e-05	0	0	0	0	0	0	0	0	0	0	0	0	0	0	0	0	0	0	0	0	0	0	0	0	0	0	0.000126786	0.00109287	0.000143524	0	0	0.000807818	0	0	0	0	0	0	0	8.97127e-06	0	0
ZOTU1582	0	0.00064023	0	0	0	0	0.00025782	0	0	0.000175276	0	0	0	0	0	0	0	0	0.000570241	0.000534529	0	0	0	0	0	0	0	0	0	0	0	0	0	0	0.000515506	0.000520273	0	6.12076e-05	0	0	0	2.28917e-05	0	0	0	0	0	0	0
ZOTU6599	0	0	0	0	0	0.00080855	0	0	0	0	0	0	0	0	0	0	0	0	0	0	0	0	0	0	0	0	0	0	0	0	0	0	0	0.000581469	0.000948532	0.000143524	0	0	0.000807818	0	0	0	0	0	0	0	0	0	0
ZOTU5027	0	0	0	0	0	0.000279317	0	0	0	0	0	0	0	0	0	0	0	0.001982	8.87042e-05	0	0	0	0	0	0	0	0	0	0	0	0	0	0	4.80914e-05	4.12405e-05	7.17618e-05	0	0	0.000775244	0	0	0	0	0	0	0	0	0	0
ZOTU3892	0.000254342	0.00302373	0	0	0	0	0	0	0	0	0	0	0	0	0	0	0	0	0	0	0	0	8.11234e-06	0	0	0	0	0	0	0	0	0	0	0	0	0	0	0	0	0	0	0	0	0	0	0	0	0	0
ZOTU5037	0	0	0	0	0	0.00294018	2.34381e-05	0	0	0	0	0	0	0	0	0	0	0	0	0	0	0	0	0	0	0	0	0	0	0	0	0	0	2.62317e-05	0.000268063	1.79404e-05	0	0	0	0	0	0	0	0	0	0	0	0	0
ZOTU1423	0	0	0	0	0	0	0	0	0	8.41326e-05	0	0	0	0	0	0	0	0	0	0	0	0	0	0	0	0	0	0	4.41462e-05	0	0	1.00422e-05	0	0	0	0	0	0	0	0	0	4.57834e-05	0	0	0.00289765	0.000192696	0	0	0
ZOTU6483	0	0	0	0	0	0.000411625	5.85954e-05	0	0	0	0	0	0	0	0	0	0	0	0	0	0	0	0	0	0	0	0	0	0	0	0	0	0	0.00226904	0	3.58809e-05	0	0	0.000488599	0	0	0	0	0	0	0	0	0	0
ZOTU6477	0.000145338	0	0	0	0	0.00127898	0.000281258	2.14404e-05	0	0	0	0	0	0	0	0	0	0.00044456	3.80161e-05	0	0	0	0	0	0	0	0	0	0	0	0	0	0	5.24634e-05	0.000412405	8.97022e-05	0	1.02013e-05	0.000254072	0	0.00023529	0	0	0	0	0	0	0	0
ZOTU8492	0.00176828	0.000478244	0	0	0	0	3.51572e-05	4.28807e-05	0	0	0	0	0	0	0	0	0	7.40933e-05	0	1.72429e-05	0	0	0.00010546	1.61495e-05	0	0	0	0	0	0	0	0	0	0	0.000247443	0.000143524	7.4524e-05	2.04025e-05	0	0.000208002	1.96075e-05	0	0	0	0	0	0	0	0
ZOTU6038	0	0	0	0	0	0.000543934	0.000117191	0	0	0	0	0	0	0	0	0	0	0.0011114	0	0	0	0	0	0	0	0	0	0	0	0	0	0	0	0.000909365	0.000288684	1.79404e-05	0	0	0.000260586	0	0	0	0	0	0	0	0	0	0
ZOTU7365	0.000109004	0.00313173	0	0	0	0	0	0	0	0	0	0	0	0	0	0	0	0	0	0	0	0	8.11234e-06	0	0	0	0	0	0	0	0	0	0	0	0	0	0	0	0	0	0	0	0	0	0	0	0	0	0
ZOTU2936	0.000448126	0.00074822	0	0	0	0	0	0	0	0	0	0	0	0	0	0	0	0	0	0	0	0	0	0	0	0	0	0	0.000176585	0	0.000229582	0.00123519	0.000184737	0	0	0	0	0	0	0	0	0	0	0	1.63709e-05	7.93453e-05	0	0	0
ZOTU2174	0	0	0	0	0	0	0	0	0	0	0	0	0	0	0	0	0	0.00322306	1.2672e-05	0	0	0	0	0	0	0	0	0	0	0	0	0	0	0	0	0	0	0	0	0	0	0	0	0	0	0	0	0	0
ZOTU5917	0	0	0	0	0	0	0	0	0	0.000161254	0	0	0	0	0	0	0	0	0	0	0	0	0	0	0	0	0	0	0.00054447	7.70787e-05	0.000149727	0.000281181	0	0	0	0	0	7.14089e-05	0	0	0	0	0	0	0.000294676	0	0	0	0
ZOTU4666	0	0	0	0	0	0.000499831	0.001043	5.00275e-05	0	0	0	0	0	0	0	0	0	0	0.00012672	0	0	0	0	0	0	0	0	0	0	0	0	0	0	9.61829e-05	0.000597987	0.00039469	0.000136627	0	0	0	0	0	0	0.00028017	0	0	0	0	0
ZOTU6414	0	0	0	0	0	0	0	0	0	0	0	0	0	0	0	0	0	0	0	0	0	0	0	0	0	0	0	0	0	0	0	0	0	0.00259257	0.000556747	7.17618e-05	0	0	0	0	0	0	0	0	0	0	0	0	0
ZOTU9469	0	0	0	0	0	0	0.000152348	2.14404e-05	0.000429984	0.000609961	0	0	0	0	0	0	0	0	0	3.44857e-05	0	0	0	0	0	0	0	0	8.82924e-05	3.85394e-05	7.48637e-05	3.01265e-05	1.84737e-05	8.7439e-06	0	5.38213e-05	9.93653e-05	8.16102e-05	6.51466e-06	8.84008e-05	9.80373e-05	0.000469279	0.0001097	0.000516102	0.000114596	0	0	0	0
ZOTU5245	0	0	0	0	0	0	0	0	0	0	0	0	0	0	0	0	0	0	0	0	0	0	8.11234e-06	0.00214788	0.000413801	0.000248555	0.000393793	0	0	0	0	0	0	0	0	0	0	0	0	0	0	0	0	0	0	0	0	0	0
ZOTU6587	0.000799361	0	0	0	0	0.000543934	0.000140629	2.85872e-05	0	0	0	0	0	0	0	0	0	0.00038899	0	0	0	0	1.62247e-05	0	0	0	0	0	0	0	0	0	0	6.99512e-05	0.000515506	5.38213e-05	0	0	0.000254072	0.000369203	1.96075e-05	0	0	0	0	0	0	0	0
ZOTU5949	0	0	0	0	0	0	0.0002461	0.00037878	0.000429984	4.20663e-05	0	0	0	0	0	0	0	0	8.87042e-05	0	0	0	0	0	0	0	0	0	0	0	0	0	0	0	2.06203e-05	0.000789379	0.000235993	0.000357044	0	0	0	3.43375e-05	1.37125e-05	0.000442373	1.63709e-05	0.00011335	0	0	0
ZOTU2216	0	0	0	0	0	0	0.000410167	0	7.1664e-05	0	0	0	0	0	0	0	0	0	0	0	0	0	0	0	0	0	0	0	0	0	0	0	3.69474e-05	0	0	1.79404e-05	0.000360199	0.000132617	0	0	0	0	0.00207059	0.00010322	0	0	0	0	0
ZOTU991	0	0	0	0	0	0	4.68763e-05	1.42936e-05	0	0	0	0	0	0	0	0	0	0	0	0	0	0	0	0	0	0	0	0	0	0	0	0	0	0	0	7.17618e-05	2.48413e-05	0	0	0.00303683	0	0	0	0	0	0	0	0	0
ZOTU1217	4.84461e-05	0.00275376	0	0	0	0	0	0	0	0	0	0	0	0	0	0	0	0	0	0	0	0	4.05617e-05	0	0	0	0	0	0	0	0	0	0	0	0	0	0	0	0	0	0	0	0	0	0	0	0	0.000349255	0
ZOTU2110	0	0	0	0	0	0.000220514	0.000222662	0.00149368	0.000214992	2.10331e-05	0	0	0	0	0	0	0	0	6.33601e-05	0.000155186	0	0	0	0	0	0	0	0	0	0	1.49727e-05	0	0	1.31158e-05	0.000309304	5.38213e-05	0.000298096	7.14089e-05	3.90879e-05	0	0	0	0	0	0	0	0	0	0
ZOTU5809	0	0	0	0	0	0.000632139	9.37526e-05	0	0	0	0	0	0	0	0	0	0	0	0	0	0	0	0	0	0	0	0	0	0	0	0	0	0	0.0022909	4.12405e-05	0	0	0	0.000123779	0	0	0	0	0	0	0	0	0	0
ZOTU1617	0	0	0	0	0	0	0	0	0.000644976	0.000119188	0	0	0	0	0	0	0	0	0	0	0	0	0	0	0	0	0	0	0	0	0	0	0	0	0	0	4.96827e-05	0.00142818	0	0	0	0.000938559	0	0	0	0	0	0	0
ZOTU1464	0	0.00317029	0	0	0	0	0	0	0	0	0	0	0	0	0	0	0	0	0	0	0	0	0	0	0	0	0	0	0	0	0	0	0	0	0	0	0	0	0	0	0	0	0	0	0	0	0	0	0
ZOTU6540	0.000666134	0.000308544	0	0	0	2.94018e-05	0	0	0	0	0	0	0	0	0	0	0	0.00203757	5.06881e-05	0	0	0	2.4337e-05	0	0	0	0	0	0	0	0	0	0	0	4.12405e-05	1.79404e-05	0	0	0	0	0	0	0	0	0	0	0	0	0
ZOTU9438	0	0	0	0	0	0	0	5.00275e-05	0	0	0	0	0	0	0	0	0	0	0	0	0	0	0	0	0	0	0	0	0	0	0	0	0	0	0.00228885	0.000681737	6.21033e-05	0	0	0	0	9.15667e-05	0	0	0	0	0	0	0
ZOTU7799	0	0	0	0	0	0	0	0	0	5.60884e-05	0	0	0	0	0	0	0	7.40933e-05	0	0	0	0	0	0	0	0	0	0	0	0	0	0	0	0	4.12405e-05	0.000125583	2.48413e-05	0.000142818	0	0	0.00015686	0.000652413	0	0.00101746	0.000212822	0	0	0	0
ZOTU2943	0	0.00134988	0	0	0	0	0	0	0	0	0	0	0	0	0	0	0	0.000203757	0.000266112	0.00134494	0	0	0	0	0	0	0	0	0	0	0	0	0	0	0	0	0	0	0	0	0	0	0	0	0	0	0	0	0
ZOTU4534	0	0	0	0	0	0	0.000750021	7.86147e-05	0.000429984	0.000231365	0	0	0	0	0	0	0	0	0.000139392	0.000517286	0	0	0	0	0	0	0	0	0	0	0	0	0	0	6.18608e-05	0	8.69446e-05	8.16102e-05	0	0	0.000431364	0.000354821	0	0	0	0	0	0	0
ZOTU9173	0	8.48497e-05	0	0	0	2.94018e-05	0	0	0	0	0	0	0	0	0	0	0	0	0	0	0	0	0	0	0	0	0	0	0	5.7809e-05	0	0	0	5.68353e-05	6.18608e-05	0	1.24207e-05	0	0.000228013	0	0.00223525	0.000389159	0	0	0	0	0	0	0
ZOTU1418	0	0	0	0	0	4.41027e-05	0.00012891	3.57339e-05	7.1664e-05	9.81547e-05	0	0	0	0	0	0	0	0	1.2672e-05	1.72429e-05	0	0	0	0	0	0	0	0	1.47154e-05	3.85394e-05	0	0	0	0	0	1.79404e-05	0.000211151	0.000244831	0	0.00139881	0.000431364	0.000160242	0.0002194	0	8.18545e-06	0	0	0	0
ZOTU4842	0	0	0	0	0	0.000338121	0	0	0	0	0	0	0	0	0	0	0	0.000777979	0	0	0	0	0	0	0	0	0	0	0	0	0	0	0	0.000236085	0.00138156	0.000215285	0	0	0.000175896	0	1.96075e-05	0	0	0	0	0	0	0	0
ZOTU4994	0	0	0	0	0	0	0	0	0	0	0	0	0	0	0	0	0	0	0	0	0	0	0	0	0	0	0	0	0	0	0	0	0	0	0	0	0	0	0	0	0	0	0	0	0	0	5.38276e-05	0.000782812	0
ZOTU7839	0	0	0.00161079	0.00144561	0	0	0	0	0	0	0	0	0	0	0	0	0	0	0	8.62143e-05	0	0	0	0	0	0	0	0	0	0	0	0	0	0	0	0	0	0	0	0	0	0	0	0	0	0	0	0	0
ZOTU4947	0	0	0	0	0	0.000588036	0.000164067	0.000121495	0	0	0	0	0	0	0	0	0	0.00050013	0.000443521	0	0	0	0	0	0	0	0	0	0	0	0	0	0	8.7439e-06	6.18608e-05	0.000125583	0.000149048	0	0.000130293	0	0	0	0	0.00084051	0	0	0	0	0
ZOTU5616	0	0	0	0	0	0	0	0	0	0	0	0	0	0	0	0	0	0	0	0	0	0	0	0	0	0	0	0	0	0	0	0	0	0	0	0	0	0	0	0	0	0	0	0	0	0	0	0.000409471	0
ZOTU2410	0	0	0	0	0	0	0	0	0	0	0	0	0	0	0	0	0	0	0	0	0	0	0	0	0	0	0	0	0	0	0	0	0	0	0	0	0	0	0	0	0	0	0	0	0	0	3.58851e-05	0.000843028	0
ZOTU5062	0	0	0.00016521	0.000524033	0	0	0	0	0	0	0	0	0	0	0	0	0	0	0	0	0	0	1.62247e-05	4.84484e-05	0.00219203	0.00011185	6.15301e-05	0	0	0	0	0	0	0	0	0	0	0	0	0	0	0	0	0	0	0	0	0	0
ZOTU4662	0.0012596	0	0	0	0	0	2.34381e-05	1.42936e-05	0	0	0	0	0	0	0	0	0	0.000944689	0.000266112	0	0	0	0	0	0	0	0	0	0	0	0	0	0	8.3067e-05	0.000268063	0.000161464	6.21033e-05	3.06038e-05	0	0	0	0	0	0	0	0	0	0	0
ZOTU4114	1.21115e-05	0.000246835	0	0	0	2.94018e-05	0.00108987	7.86147e-05	0	2.10331e-05	0	0	0	0	0	0	0	0	0.000164736	0	0	0	0	0	0	0	0	0	0	0	0	0	0	0	0.000288684	0.000179404	0.000161469	0.000265233	1.30293e-05	0	0.00023529	1.14458e-05	0.000205688	0.00010322	0	0	0	0	0
ZOTU7101	0	0	0	0	0	0.000191112	0	0	0	0	0	0	0	0	0	0	0	0	2.5344e-05	0	0	0	0	0	0	0	0	0	0	0	0	0	0	0.00156516	0.000288684	0.000107643	0	0	0.000690554	0	0.00023529	0	0	0	0	0	0	0	0
ZOTU1450	0	0	0	0	0	0	0	0	7.1664e-05	0.000224354	0	0	0	0	0	0	0	0	0	0	0	0	0	0	0	0	0	0	0	0	0	0	0	0	0	0	0	8.16102e-05	0	0	0	8.01209e-05	0	0	0.000204636	0	0	0	0
ZOTU9037	0	0	0	0	0	0.000279317	0.000304696	0.000414514	0.000644976	0	0	0	0	0	0	0	0	0	0	0	0	0	0	0	0	0	0	0	0.0001913	1.92697e-05	2.49546e-05	0	0	0	0	0.000574094	0.000149048	0.000234629	0	0	0.000196075	0	0	0	6.54836e-05	0	0	0	0
ZOTU3050	0	0	0	0	0	0	1.17191e-05	0	7.1664e-05	0.000392619	0.000192595	0	0	0	0	0	0	0	0	1.72429e-05	0	0	0	0	0	0	0	0	0.000161869	0.000693708	0.000524046	0	0	0	0	0.000107643	0.000422303	0.000306038	0	0	0	0.000160242	0	1.47458e-05	1.63709e-05	0	0	0	0
ZOTU5829	0	0	0	0	0	0	0	0	0.000429984	0.000455718	0	0	0	0	0	0	0	0	0	0.000224157	0	0	0	0	0	0	0	0	0	0.000308315	2.49546e-05	0	0.000203211	0	0	0	1.24207e-05	0.000265233	0	0	0	0.000698196	0	0	3.27418e-05	0	0	0	0
ZOTU2593	0	0	0	0	0	0	0	2.85872e-05	0	0	0	0	0	0	0	0	0	0	0	0	0	0	0	0	0	0	0	0	0	0	0	0	0	0	0.000164962	7.17618e-05	0.000235993	0.000418252	0	0	0.000117645	2.28917e-05	0.000493651	0.00153356	0	0	0	0	0
ZOTU2298	0	0	0	0	0	0	0	0	0	0	0	0	0	0	0	0	0	0.00268588	6.33601e-05	0	0	0	0	0	0	0	0	0	0	0	0	0	0	0	0.000164962	0	0	0	0.000169381	0	0	0	0	0	0	0	0	0	0
ZOTU3059	0	0	0	0	0	0	0	0	0	0	0	0	0	0	0	0	0	0	0	0	0	0	0	0	0	0	0	0	0	0	0	0	0	0.00142525	8.2481e-05	8.97022e-05	0	0	0.00148534	0	0	0	0	0	0	0	0	0	0
ZOTU2949	0	0	0	0	0	0	1.17191e-05	0	0.00035832	4.20663e-05	0	0	0	0	0	0	0	0	0.00019008	0.000293129	0	0	0	0	0	0	0	0	0.000161869	5.7809e-05	0	0	0	0	0.000103101	0.000484392	2.48413e-05	0.000346843	0	0	0	0.00100723	0	0	0	0	0	0	0
ZOTU4658	0	0	0	0	0	0.000294018	0.000175786	0	0.000143328	5.60884e-05	0	0	0	0	0	0	0	0	0	0	0	0	0	0	0	0	0	0	0	0	0	0	0	0.00013553	0.000989772	0.00039469	0.000111786	0.000714089	5.21173e-05	0	0	0	0	0	0	0	0	0	0
ZOTU4349	0	0	0	0	0	4.41027e-05	0.000667987	0.000114349	7.1664e-05	7.01105e-06	0	0	0	0	0	0	0	0	0	0	0	0	0	0	0	0	0	0	2.94308e-05	5.7809e-05	0	0	0.000221684	2.62317e-05	0.000268063	0.0010226	0.000260834	9.18114e-05	1.30293e-05	0	0.000137252	1.14458e-05	0	1.47458e-05	0	0	0	0	0
ZOTU6111	0	0	0	0	0	0.00064684	0.000210943	0.000250138	0	0	0	0	0	0	0	0	0	0.000481606	2.5344e-05	0	0	0	0	0	0	0	0	0	0	0	0	0	0	3.49756e-05	0.000412405	0.000269107	6.21033e-05	0	0.00028013	0	0.000372542	0	0	0	0	0	0	0	0
ZOTU9090	0	0	0	0	0	5.88036e-05	0	0.000142936	0	5.60884e-05	0	0	0	0	0	0	0	0.00213018	0.000114048	0	0	0	0.00013791	1.61495e-05	0	0	0	0	1.47154e-05	3.85394e-05	0	0	0	4.37195e-05	2.06203e-05	0.000125583	0	2.04025e-05	0.000123779	0	0	0	0	0	0	0	0	0	0
ZOTU8763	0	0	0	0	0	0	0.000316415	0.000293018	0	0.000392619	0	0	0	0	0	0	0	0	8.87042e-05	0	0	0	0	0	0	0	0	0	0	3.85394e-05	0	0	0	0	2.06203e-05	0.000340868	0.000111786	0.000122415	0.000156352	0	0	0	0.000548501	0.000604577	0	0	0	0	0
ZOTU8522	0	0	0	0	0	0.000132308	0.000386729	0.000328752	7.1664e-05	3.50552e-05	0	0	0	0	0	0	0	9.26166e-05	0.00012672	0	0	0	0	0	0	0	0	0	0.000264877	0.000134888	0.000199637	0.000220928	0.000129316	0.000104927	0.000103101	0.000179404	0.000310517	0.000153019	0	0	0	5.72292e-05	0	0	0	0	0	0	0
ZOTU1832	4.84461e-05	0	0	0	0	0	0	0	0	0	0	0	0	0	0	0	0	0	0	0	0	0	0	0	0	0	0	0	0	0	0	0	0	0.000275433	0.00181458	0.000753498	0	0	0.000123779	0	0	0	0	0	0	0	0	0	0
ZOTU6009	0	0	0	0	0	0	0	0	0	0	0.00144446	0	0	0	0	0	0	0.00151891	5.06881e-05	0	0	0	0	0	0	0	0	0	0	0	0	0	0	0	0	0	0	0	0	0	0	0	0	0	0	0	0	0	0
ZOTU7866	0.000218007	0	0	0	0	0	5.85954e-05	0	0	0.000147232	0	0	0	0	0	0	0	0	6.33601e-05	0	0	0	0	0	0	0	0	0	0	0.000366124	0.000129764	0.000110464	0	0	0	8.97022e-05	4.96827e-05	0.000204025	0	0	0.000352934	0.000606629	0	0.000604577	8.18545e-06	0	0	0	0
ZOTU2790	0	0	0	0	0	0.000117607	0.000691425	0.00040022	7.1664e-05	7.01105e-06	0	0	0	0	0	0	0	0	0.000468865	0	0	0	0	0	0	0	0	0	0	0	0	0	0	0	0.000474266	0.000592034	0.000111786	7.14089e-05	0	0	0	0	0	0	0	0	0	0	0
ZOTU4262	0.000811472	0	0	0	0	0	0.000210943	4.28807e-05	0	0	0	0	0	0	0	0	0	0	0.000177408	0	0	0	0	0	0	0	0	0	0	0	0	0	0	0	0.000969152	0.000304987	9.93653e-05	0	0.000384365	0	0	0	0	0	0	0	0	0	0
ZOTU7825	0	0	0	0	0	0.00126428	0	0	0	0	0	0	0	0	0	0	0	0	0	0	0	0	0	0	0	0	0	0	0	0	0	0	0	0.000756347	0.000412405	0	0	0	0.000566775	0	0	0	0	0	0	0	0	0	0
ZOTU1983	0	0	0	0	0	0	0	0	0.000143328	0	0	0	0	0	0	0	0	0	0	0	0	0	0	0	0	0	0	0	0	0.000346854	9.98183e-06	0	0	0	0	5.38213e-05	4.96827e-05	4.08051e-05	0	0	0	0.000434942	0	0.00191695	0	0	0	0	0
ZOTU2178	9.68922e-05	0	0	0	0	0.000102906	0.00025782	3.57339e-05	0	0	0.000505561	0	0	0	0	0	0	0	0.000177408	0	0	0	0	0	0	0	0	0	0	0	2.99455e-05	0	0	0	0.000433025	0.000197345	2.48413e-05	0.000153019	0	0	0.000980373	0	0	0	0	0	0	0	0
ZOTU1570	0	0	0	0	0	0	0	0	0	0	0	0	0	0	0	0	0	0	0	0	0	0	0.00295289	2.42242e-05	0	0	0	0	0	0	0	0	0	0	0	0	0	0	0	0	0	0	0	0	0	0	0	0	0
ZOTU2538	0	0	0	0	0	0	5.85954e-05	0	0	2.80442e-05	0	0	0	0	0	0	0	3.70466e-05	0.000988418	0.000448315	0	0	0	0	0	0	0	0	0	0	0	0	0	0	0.00082481	0.000430571	4.96827e-05	0	0.000117264	0	0	0	0	0	0	0	0	0	0
ZOTU5988	0	0	0	0	0	0	0	0	0	0	0	0	0	0	0	0	0	0	0	0	0	0	0	0	0	0	0	0	0.000838778	0.00059736	0.00100817	0.000331392	0.000129316	0	0	0	0	0	0	0	0	0	0	0	7.3669e-05	0	0	0	0
ZOTU1848	0	0	0	0	0	0.000367523	0.000363291	0.000271578	0	0	0	0	0	0	0	0	0	0.00033342	0.000582913	0	0	0	0	0	0	0	0	0	0	0	0	0	0	0.000122415	0.000515506	0.000340868	3.7262e-05	3.06038e-05	0	0	0	0	0	0	0	0	0	0	0
ZOTU4166	0	0	0	0	0	0	0	0	0	2.80442e-05	0	0	0	0	0	0	0	0	0	0	0	0	0	0	0	0	0	0	0	0	2.49546e-05	0	0	0	0	0	0	1.02013e-05	0	0	0	0	0	0	0	0.00204031	0.000305023	0	0
ZOTU5385	1.21115e-05	0	0	0	0	0.000147009	0.000550796	4.28807e-05	0	0	0	0	0	0	0	0	0	0	0.000570241	0	0	0	0	0	0	0	0	0	0	1.92697e-05	0	0	0	0.000174878	0.00107225	0.000287047	3.7262e-05	1.02013e-05	0	0	1.96075e-05	0	0	0	0	0	0	0	0
ZOTU9261	0	0	0	0	0	0	0	3.57339e-05	0.000286656	0.000105166	0	0	0	0	0	0	0	0	0	0	0	0	0	0	0	0	0	0	0.000470893	0.000385394	7.98547e-05	6.02531e-05	0.000424895	0	0	3.58809e-05	0	0.000234629	0	0	0	1.14458e-05	0	0	0.000474756	0.000170026	5.38276e-05	0	0
ZOTU8402	7.26691e-05	0	0	0	0	2.94018e-05	0.000585954	7.86147e-05	0.000143328	0	0	0	0	0	0	0	0	0	0.00019008	0	0	0	0	0	0	0	0	0	0	3.85394e-05	0	0	0	0	0.000164962	7.17618e-05	0	0.000204025	0	0	0.000215682	0.000171688	0.000617064	0.000353899	0	0	0	0	0
ZOTU5821	0	0	0	0	0	0.00192582	0	0	0	0	0	0	0	0	0	0	0	0	0	0	0	0	0	0	0	0	0	0	0	0	0	0	0	0.000489658	0.000185582	0.000143524	0	0	0.000188925	0	0	0	0	0	0	0	0	0	0
ZOTU4728	0	0	0	0	0	0.000837952	0.000117191	7.86147e-05	0	0	0	0	0	0	0	0	0	0	0	0	0	0	0	0	0	0	0	0	0	0	0	0	0	0.0015433	0.000103101	1.79404e-05	0	0	0.000234528	0	0	0	0	0	0	0	0	0	0
ZOTU2007	0	0	0	0	0	0	0	0	0	0	0	0	0	0	0	0	0	0	0	0	0	0	0	0	0	0	0	0	2.94308e-05	0	0	0	0	0	0	1.79404e-05	0	0	0	0	0	0	0	0	0.00267664	0.000204031	0	0	0
ZOTU2691	0	0	0	0	0	0	0	0	0	0	0	0	0	0	0	0	0	0	0	0	0	0	8.11234e-06	0	0	4.97111e-05	0.00113215	0.00173793	0	0	0	0	0	0	0	0	0	0	0	0	0	0	0	0	0	0	0	0	0
ZOTU2441	0.00015745	0	0	0	0	0.000470429	9.37526e-05	0	0	0	0	0	0	0	0	0	0	0.00101878	0	0	0	0	0	0	0	0	0	0	0	0	0	0	0	0.000577097	0.000412405	0.000125583	0	0	7.16612e-05	0	0	0	0	0	0	0	0	0	0
ZOTU8217	0	0	0	0	0	0	1.17191e-05	0	0	0	0	0	0	0	0	0	0	0	0	0	0	0	0	0	0	0	0	0	0.000441462	0	0	0	0	5.24634e-05	0.000969152	0.00039469	8.69446e-05	0.000377447	8.46906e-05	0	0.000470579	2.28917e-05	0	0	0	0	0	0	0
ZOTU6461	0	0	1.37675e-05	0	0	0	0	0	0	3.50552e-05	0	0	0	0	0	0	0	0	0	0	0	0	0	0	0	0	0	0	0	0	0	0	0	0	0	0	0	1.02013e-05	0	0	0	0	0	0	0	6.80102e-05	8.97127e-06	0	0
ZOTU6474	0.000121115	0	0	0	0	0.000661541	0	0	0	0	0	0	0	0	0	0	0	0.00177824	2.5344e-05	0	0	0	0	0	0	0	0	0	0	0	0	0	0	7.43231e-05	8.2481e-05	1.79404e-05	0	0	0.000143322	0	0	0	0	0	0	0	0	0	0
ZOTU6308	0	0	0	0	0	0	0	0	0.00035832	0.000588928	0	0	0	0	0	0	0	0	0.00012672	0	0	0	0	0	0	0	0	0	0	7.70787e-05	0	5.02109e-05	0	6.99512e-05	4.12405e-05	0.000197345	6.21033e-05	0.000193824	1.30293e-05	0	0	0.00103013	0	0	0	0	0	0	0
ZOTU5903	0	0	0	0	0	0	0	0	0	0.000147232	0	0	0	0	0	0	0	0	0	0	0	0	0	0	0	0	0	0	0.00035317	0.00158011	0.000529037	0	0.000221684	0	0	0	0	0	0	0	0	0	0	0	5.72981e-05	0	0	0	0
ZOTU1717	0	0	0	0	0	0.000338121	0.00216803	0.00136504	0.000286656	0.000308486	0.00016852	0	0	0	0	0	0	0	0.000405505	0.000155186	0	0	0	0	0	0	0	0	0.000176585	9.63484e-05	0	0	0	1.74878e-05	0.000577367	0.000215285	0.000707978	0.000295837	0.000703583	0.00303683	0.00360777	0.000217471	0.015934	0.00712221	0	0	0	0	0
ZOTU4264	0	0	0	0	0	0.000308719	0.000292977	0.000521716	0	1.40221e-05	0	0	0	0	0	0	0	0.000148187	0	0	0	0	0	0	0	0	0	0	1.47154e-05	0.000115618	0	0	0	0	0.000103101	0.000592034	0.000136627	1.02013e-05	0	0	0.000509794	6.8675e-05	0	0	4.91127e-05	0	0	0	0
ZOTU8407	0	0	0	0	0	0.000588036	2.34381e-05	0	0	0	0	0	0	0	0	0	0	0	0	0	0	0	0	0	0	0	0	0	0	0	0	0	0	0.00111485	0.000412405	0.000179404	0	0	0.000553746	0	0	0	0	0	0	0	0	0	0
ZOTU9776	0	0	0	0	0	0.000147009	0	0	0	0	0	0	0	0	0	0	0	0.00253769	0.000114048	0	0	0	0	0	0	0	0	0	0	0	0	0	0	2.62317e-05	4.12405e-05	0	0	0	0	0	0	0	0	0	0	0	0	0	0
ZOTU7304	0	0	0	0	0	8.82055e-05	0.000750021	0.000843321	0	0	0	0	0	0	0	0	0	7.40933e-05	1.2672e-05	0	0	0	0	0	0	0	0	0	0.000132439	0	0	0	0	0	0.000907291	0	3.7262e-05	2.04025e-05	0	0	0	0	0	0	0	0	0	0	0
ZOTU1853	0	7.71361e-05	0	0	0	2.94018e-05	0.000433606	0.000171523	7.1664e-05	0	0	0	0	0	0	0	0	0	0.000114048	0	0	0	0	0	0	0	0	0	0	0	0	0	0	0	2.06203e-05	0	0.000273255	0	4.56026e-05	0	0.00162742	0	0	0	0	0	0	0	0
ZOTU5944	0.000411792	0	0	0	0	0.00102906	0	0	0	0	0	0	0	0	0	0	0	0.000833549	2.5344e-05	0	0	0	0	0	0	0	0	0	0	0	0	0	0	0.000104927	0.000329924	0.000125583	0	0	0	0	0	0	0	0	0	0	0	0	0
ZOTU5579	0	0	0	0	0	0.00102906	4.68763e-05	0	0	0	0	0	0	0	0	0	0	0.000351943	0	0	0	0	0	0	0	0	0	0	0	0	0	0	0	0.000843786	0.000371165	0.000143524	0	0	7.16612e-05	0	0	0	0	0	0	0	0	0	0
ZOTU7867	0	0	0	0	0	0.000132308	3.51572e-05	0	0	0	0	0	0	0	0	0	0	0	3.80161e-05	0	0	0	0	0	0	0	0	0	0	0	0	0	0	0.000931225	0.000309304	3.58809e-05	0	0	0.00137459	0	0	0	0	0	0	0	0	0	0
ZOTU9174	0.00151394	0	0	0	0	1.47009e-05	1.17191e-05	7.14679e-05	0	0	0	0	0	0	0	0	0	0.00072241	7.60321e-05	0	0	0	0	0	0	0	0	0	0	0	0	0	0	0	4.12405e-05	5.38213e-05	0.000198731	0	0.000149837	0	0	0	0	0	0	0	0	0	0
ZOTU4263	0	0	0	0	0	2.94018e-05	0.000281258	5.00275e-05	0	2.10331e-05	0	0	0	0	0	0	0	0	2.5344e-05	0	0	0	0	0	0	0	0	0	0.000412031	9.63484e-05	0	0	0	0.000148646	0.000866051	0.000251166	0.000347779	4.08051e-05	0	0	0	0	0	0.00028017	0	0	0	0	0
ZOTU1195	0	0	0	0	0	0	0	0	0	0	0	0	0	0	0	0	0	0	0	0	0	0	0	0	0	0	0	0	0	0	0	0	0	0	0	0	0	0	0	0	0	0	0	0	0	0	0	0	0
ZOTU2023	0	0	0	0	0	0	0	0	0	0	0	0	0	0	0	0	0	0	0	0	0	0	3.24494e-05	0.00114661	0.00046972	0.0011185	7.38362e-05	0	0	0	0	0	0	0	0	0	0	0	0	0	0	0	0	0	0	0	0	0	0
ZOTU2824	0	0	0	0	0	0	0.000175786	0	7.1664e-05	3.50552e-05	0	0	0	0	0	0	0	0	0	0.000275886	0	0	0	0	0	0	0	0	0	0.000115618	1.49727e-05	0	0.000295579	0	0	8.97022e-05	4.96827e-05	0.000122415	0	0	0.000725476	0.000160242	0	0.000648814	8.18545e-06	3.40051e-05	0	0	0
ZOTU2613	0	0	0	0	0	0.00138189	0	0	0	0	0	0	0	0	0	0	0	0	0	0	0	0	0	0	0	0	0	0	0	0	0	0	0	0.000839414	0.000268063	0.000107643	0	0	0.000228013	0	0	0	0	0	0	0	0	0	0
ZOTU6443	0	0	0	0	0	0.00104376	0	0	0	0	0	0	0	0	0	0	0	0.000185233	0	0	0	0	0	0	0	0	0	0	0	0	0	0	0	0	0.000309304	0.000143524	0	0	0.00114007	0	0	0	0	0	0	0	0	0	0
ZOTU5797	0	0	0.000330419	0.000180701	0.000345351	0	0	0	0	0	0	0.0017904	0.000171911	0	0	0	0	0	0	0	0	0	0	0	0	0	0	0	0	0	0	0	0	0	0	0	0	0	0	0	0	0	0	0	0	0	0	0	0
ZOTU5704	0	0	0	0	0	0	0	0	0	7.01105e-06	0	0	0	0	0	0	0	0	0	0	0	0	0.00238503	0.000411812	0	0	0	0	0	0	0	0	0	0	0	0	0	1.02013e-05	0	0	0	0	0	0	0	0	0	0	0
ZOTU1148	0	0	0	0	0	0.000147009	0	0	0	0	0	0	0	0	0	0	0	0	0	0	0	0	0	0	0	0	0	0	0	0	0	0	0	0	0.000226823	0	0	0	0.000143322	0.00229322	0	0	0	0	0	0	0	0	0
ZOTU4611	0	0	0	0	0	1.47009e-05	0.00139457	0.000100055	0	2.10331e-05	0	0	0	0	0	0	0	0	0	0	0	0	0	0	0	0	0	0	0	0	0	0	0	0.000131158	0.000433025	0.000466451	6.21033e-05	9.18114e-05	0	0	0	9.15667e-05	0	0	0	0	0	0	0
ZOTU4049	0	0	0	0	0	8.82055e-05	3.51572e-05	0	7.1664e-05	0	0	0	0	0	0	0	0	0	1.2672e-05	0	0	0	0	0	0	0	0	0	0	0	0	0	0	0.000170506	0.000907291	0.000592034	0.000273255	0.00016322	9.77199e-05	0	0.000392149	0	0	0	0	0	0	0	0
ZOTU2000	0.000423903	0	0	0	0	0.000426326	8.20335e-05	0	0	0	0	0	0	0	0	0	0	0.000129663	2.5344e-05	0	0	0	0	0	0	0	0	0	0	0	0	0	0	0.000996804	0.000371165	5.38213e-05	0	0	0.00029316	0	0	0	0	0	0	0	0	0	0
ZOTU3076	0	0	0	0	0	0	8.20335e-05	0.000114349	0	0	0	0	0	0	0	0	0	0	0	0	0	0	0	0	0	0	0	0	0	0	0	0	0	0	0.000577367	0.00039469	0.000260834	0.000377447	0	0.000993209	0	0	0	0	0	0	0	0	0
ZOTU5588	0	0	0	0	0	0.000441027	0	0	0	0	0	0	0	0	0	0	0	0	0	0	0	0	0	0	0	0	0	0	0	0	0	0	0	0.000712627	0.000453646	0.000143524	0	0	0.00104886	0	0	0	0	0	0	0	0	0	0
ZOTU4787	0	0	0	0	0	0.000984961	1.17191e-05	0	0	0	0	0	0	0	0	0	0	0	0	0	0	0	0	0	0	0	0	0	0	0	0	0	0	0.000249201	8.2481e-05	3.58809e-05	0	0	0.0014202	0	0	0	0	1.47458e-05	0	0	0	0	0
ZOTU6046	0	0	0.000936188	0.00186122	0	0	0	0	0	0	0	0	0	0	0	0	0	0	0	0	0	0	0	0	0	0	0	0	0	0	0	0	0	0	0	0	0	0	0	0	0	0	0	0	0	0	0	0	0
ZOTU9132	0	0	0	0	0	0	0	7.14679e-06	0	0.000995569	0	0	0	0	0	0	0	0	0	0.0002414	0	0	0	0	0	0	0	0	0	0.000366124	0	0	0	0	0	0	0.000111786	0.000346843	0	0	0	0.000721088	0	0	0	0	0	0	0
ZOTU5321	0	0	0	0	0	0	0	0	0.000429984	0.000434685	0	0	0	0	0	0	0	0	0	0.000275886	0	0	0	0	0	0	0	0	0.0001913	0	0	0	0	0	0	0.00123789	0	0.000183623	0	0	0	0	0	0	3.27418e-05	0	0	0	0
ZOTU9759	0	0	0	0	0	0	0	0	0	0	0	0	0	0	0	0	0	0	0	0	0	0	0	0	1.11838e-05	0.000347977	0.000972176	0.00144281	0	0	0	0	0	0	0	0	0	0	0	0	0	0	0	0	0	0	0	0	0
ZOTU1745	0	0	0	0	0	0	0	0	0	0	0	0	0	0	0	0	0	0	0	0	0	0	0	0	0	0	0	0	0	0	0	0	0	0	0	0	0	0	0	0	0	0	0	0	0	0.0026524	0	0	0
ZOTU7735	0	0	0	0	0	8.82055e-05	5.85954e-05	0	0.00035832	0.000371586	0	0	0	0	0	0	0	0	0	0	0	0	0	0	0	0	0	0	0	0.000115618	0	0	0.000166263	0	0	3.58809e-05	3.7262e-05	0.000214227	8.46906e-05	0	0.000529401	0.00068675	0	0	0	0	0	0	0
ZOTU2759	0	7.71361e-06	0	0	0	0	0	7.14679e-06	7.1664e-05	9.81547e-05	0	0	0	0	0	0	0	0	0	3.44857e-05	0	0	0	0	0	0	0	0	1.47154e-05	0.000192697	9.48274e-05	0.000492067	0.00129316	0	0	0.000161464	3.7262e-05	0.000112214	0	0	0	6.8675e-05	0	1.47458e-05	6.54836e-05	0	0	0	0
ZOTU4418	0	0	0	0	0	0	1.17191e-05	0.000235844	7.1664e-05	0.000645017	0	0	0	0	0	0	0	0	0	0.000620743	0	0	0	0	0	0	0	0	7.3577e-05	1.92697e-05	0.000234573	1.00422e-05	0.000110842	0	2.06203e-05	0.000143524	0.000347779	0.000214227	0	0	0	0	0	0	0	0	0	0	0
ZOTU1789	0.00163506	0.000424249	0	0	0	0	0	2.14404e-05	0	0	0	0	0	0	0	0	0	0	0.000139392	0.000413829	0	0	0	0	0	0	0	0	0.000117723	0	0	0	0	0	0	0	0	0	0	0	0	0	0	0	0	0	0	0	0
ZOTU8815	8.47807e-05	0	0	0	0	0.0016465	5.85954e-05	0	0	0	0	0	0	0	0	0	0	0	0.000139392	0	0	0	0	0	0	0	0	0	0	0	0	0	0	0.00017925	0.000515506	0.000125583	0	0	0	0	0	0	0	0	0	0	0	0	0
ZOTU8480	0	0	0	0	0	0.000882055	0.000164067	4.28807e-05	0	1.40221e-05	0	0	0	0	0	0	0	0	0.000316801	0	0	0	0	0	0	0	0	0	0	0	0	0	0	2.62317e-05	0.000164962	0.00041263	0	0	5.86319e-05	0	0.000666654	0	0	0	0	0	0	0	0
ZOTU4810	0	0	0	0	0	0.000749746	0.000164067	0.000571743	0	0	0	0	0	0	0	0	0	0	0	0	0	0	0	0	0	0	0	0	0	0	0	0	0	0.000192366	0.000144342	8.97022e-05	2.48413e-05	0	1.9544e-05	0	0.000725476	5.72292e-05	0	0	0	0	0	0	0
ZOTU8184	0	0	0	0	0	0	0.000175786	0.000185816	0	2.80442e-05	0	0	0	0	0	0	0	0	0	0	0	0	0	0	0	0	0	0	0.000824063	0.000327585	6.48819e-05	9.03796e-05	0	0	2.06203e-05	0.000179404	0.000347779	3.06038e-05	1.9544e-05	0	0	6.8675e-05	0	0	0	0.000362721	0	0	0
ZOTU9300	0	0	0	0	0	0	0	0	7.1664e-05	0.000196309	0	0	0	0	0	0	0	0	0	0	0	0	0	0	0	0	0	0	0	0.000520281	0	0	0	0	4.12405e-05	7.17618e-05	4.96827e-05	0.000122415	0	0	0	0.000606629	0.000754189	4.42373e-05	0.000229193	0	0	0	0
ZOTU8558	0	0	0	0	0	0.000176411	0.000187505	8.57615e-05	0.000143328	2.80442e-05	0	0	0	0	0	0	0	0	1.2672e-05	0	0	0	0	0	0	0	0	0	7.3577e-05	0.000115618	1.99637e-05	0	0	8.7439e-06	4.12405e-05	0.000502332	0.000459565	0.000214227	0	0	0.000117645	8.01209e-05	0	0.000250678	4.91127e-05	0	0	0	0
ZOTU1311	0	0	0	0	0	0	0	0	0	0	0	0	0	0	0	0	0	0	0	0	0	0	0	0	0	0	0	0	0	7.70787e-05	0	0	0	0	0	0	0	0	0	0	0	0	0	0	0	0	0.00231459	0	0
ZOTU5587	0	0	0	0	0	8.82055e-05	0.000703144	0.000135789	0.000143328	0.000105166	0	0	0	0	0	0	0	0	0	0	0	0	0	0	0	0	0	0	8.82924e-05	0	3.49364e-05	0.000371561	0	0	0	0.000161464	0.000149048	4.08051e-05	0	0	0.000333327	0.000194579	0	0.000162204	0	0	0	0	0
ZOTU6203	0	0	0	0	0	0.000382224	0.000117191	0	0	0	0	0	0	0	0	0	0	0	0	0	0	0	8.11234e-06	0	0	0	0	0	0	0	0	0	0	0.00033664	4.12405e-05	1.79404e-05	0.00055893	0	0.000286645	0	0.000137252	0.00013735	0.000685627	0	0	0	0	0	0
ZOTU4690	0	0	0	0	0	0.000882055	5.85954e-05	0	0	0	0	0	0	0	0	0	0	0	1.2672e-05	0	0	0	0	0	0	0	0	0	0	0	0	0	0	0.000957457	0.000659848	0.000107643	0	0	0	0	0	0	0	0	0	0	0	0	0
ZOTU975	2.4223e-05	0	0	0	0	0.000543934	0.00206256	0.00303738	0.00121829	0.000581917	0	0	0	0	0	0	0	0	0.000240768	0.000137943	0	0	0	0	0	0	0	0	0.000470893	0.000674439	5.9891e-05	6.02531e-05	7.38948e-05	4.80914e-05	0.000103101	0.000215285	0.00183826	0.000581472	0.000807818	0.00273522	0.0086861	0.00176266	0.00614321	0.00230034	0	0	0	0	0
ZOTU5559	0	0	0	0	0	0.000102906	0.000187505	1.42936e-05	0	7.71215e-05	0	0	0	0	0	0	0	0	0.000557569	0	0	0	0	0	0	0	0	0	7.3577e-05	1.92697e-05	0	0	0	0	6.18608e-05	0.000233226	0	4.08051e-05	0	0.00130521	0	1.14458e-05	0	0	0	0	0	0	0
ZOTU6085	0	0	0	0	0	0	0	0	7.1664e-05	0	0	0	0	0	0	0	0	0	0	0	4.94274e-06	0	0	0	0	0	0	0	0	0.000982754	0.000304446	0.000903796	0.000277106	0	0	0	0	0	0	0	0	0	0	0	0	9.06803e-05	0	0	0
ZOTU8455	0.000254342	0	0	0	0	4.41027e-05	8.20335e-05	0.000700385	0	0	0	0	0	0	0	0	0	0.00033342	0.000228096	0.000689715	0	0	0	0	0	0	0	0	0.000117723	3.85394e-05	1.49727e-05	0	0	1.31158e-05	6.18608e-05	1.79404e-05	0	2.04025e-05	5.21173e-05	0	0	0	0	0	0	0	0	0	0
ZOTU5924	0	0	0	0	0	0.00104376	0	0	0	0	0	0	0	0	0	0	0	0	0	0	0	0	0	0	0	0	0	0	0	0	0	0	0	0.000231713	8.2481e-05	0.000197345	0	0	0.00112052	0	0	0	0	0	0	0	0	0	0
ZOTU1278	0	0	0	0	0	0	0	0	0	0	0	0	0	0	0	0	0	0	0	0	0	0	0.000413729	0.00226093	0	0	0	0	0	0	0	0	0	0	0	0	0	0	0	0	0	0	0	0	0	0	0	0	0
ZOTU3038	0	0	0	0	0	0.000426326	3.51572e-05	3.57339e-05	0	1.40221e-05	0	0	0	0	0	0	0	0	0	0	0	0	0	0	0	0	0	0	0	0	0	0	0	0.000428451	0.00105163	0.000161464	0	0	0.000273616	0	0	0.000240363	0	0	0	0	0	0	0
ZOTU6183	0	0	0	0	0	0	2.34381e-05	0.000142936	0.000429984	0.00053284	0	0	0	0	0	0	0	0	0	0.000137943	0.000212538	5.58056e-05	0	0	0	0	0	0	2.94308e-05	5.7809e-05	0.000364337	7.02952e-05	9.23685e-05	0	2.06203e-05	0.000179404	9.93653e-05	1.02013e-05	0	0	0	6.8675e-05	0	2.94916e-05	1.63709e-05	0	0	0	0
ZOTU6772	0	0	0	0	0	8.82055e-05	0.000890649	0.000264431	0.000286656	3.50552e-05	0	0	0	0	0	0	0	0	1.2672e-05	0	0	0	0	0	0	0	0	0	0	0	0	0	0	0	4.12405e-05	5.38213e-05	0.000173889	0.000234629	0	0	0	0	0	0.000575086	0	0	0	0	0
ZOTU4272	0	0	0	0	0	0.000514532	0	0	0	0	0	0	0	0	0	0	0	0	0	0	0	0	0	0	0	0	0	0	0	1.92697e-05	0	0	0	0.0014034	0.000371165	0.000269107	0	0	7.81759e-05	0	0	0	0	0	0	0	0	0	0
ZOTU2377	0	0	0	0	0	0	2.34381e-05	0	0	0	0	0	0	0	0	0	0	0.00263031	0	0	0	0	0	0	0	0	0	0	0	0	0	0	0	0	0	0	0	0	0	0	0	0	0	0	0	0	0	0	0
ZOTU5863	0.000981033	0.000223695	0	0	0	0	0	0	0	0	0.000361115	0	0	0	0	0	0	0.00027785	7.60321e-05	0.000655229	0	0	5.67864e-05	1.61495e-05	0	0	0	0	0	0	0	0	0	0	0	0	0	0	0	0	0	0	0	0	0	0	0	0	0
ZOTU7786	0.000993145	0	0	0	0	0.000147009	0	0	0	0	0	0	0	0	0	0	0	0.00131516	0	0	0	0	0	0	0	0	0	0	0	0	0	0	0	0	0	0	0	0	0.000188925	0	0	0	0	0	0	0	0	0	0
ZOTU3502	0	0	0	0	0	0.000573335	4.68763e-05	0.00022155	0.000143328	1.40221e-05	0	0	0	0	0	0	0	0	1.2672e-05	0	0	0	0	0	0	0	0	0	0	0	9.48274e-05	0	0	0.000131158	0.000433025	8.97022e-05	0.000521668	9.18114e-05	0.000267101	0	0	0	0	0	0	0	0	0	0
ZOTU9570	0	0	0	0	0	0.000279317	0.000210943	2.14404e-05	0	4.90773e-05	0	0	0	0	0	0	0	0	0	0	0	0	0	0	0	0	0	0	1.47154e-05	1.92697e-05	0	0	0	0.000109299	0.00105163	0.000520273	0.000136627	6.12076e-05	2.60586e-05	0	0.000117645	2.28917e-05	0	0	0	0	0	0	0
ZOTU5047	0.00194996	0	0	0	0	0	0	0	0	0	0	0	0	0	0	0	0	0.000685363	0	0	0	0	0	0	0	0	0	0	0	0	0	0	0	0	0	0	0	0	0	0	0	0	0	0	0	0	0	0	0
ZOTU1810	0	0	0	0	0	0	0.000785178	0.000114349	0.000286656	9.11436e-05	0	0	0	0	0	0	0	0	0.000430849	0.000103457	0	0	0	0	0	0	0	0	0	0	0	0	0	0	0	0	0.000223572	0.000153019	0	0	0	0	0	0.000442373	0	0	0	0	0
ZOTU5246	0	0	0	0	0	0.000735045	0.000175786	0.000257284	0.000286656	7.01105e-05	0	0	0	0	0	0	0	0	7.60321e-05	0	0	0	0	0	0	0	0	0	4.41462e-05	0	0	0	0	8.7439e-05	6.18608e-05	0.000143524	0.000173889	0.000295837	5.86319e-05	0	0	0.000160242	0	0	0	0	0	0	0
ZOTU1296	1.21115e-05	0.00239122	4.13024e-05	0	0	0	0	0	0	0	0	0	0	0	0	0	0	0	0	0.000172429	0	0	0	0	0	0	0	0	0	0	0	0	0	0	0	0	0	0	0	0	0	0	0	0	0	0	0	0	0
ZOTU3150	0	0	0	0	0	0	3.51572e-05	0	0	0.000252398	0	0	0	0	0	0	0	0	0	0	0	0	0	0	0	0	0	0	0	0	0	0	0	0	0	1.79404e-05	2.48413e-05	0.000122415	0	5.20005e-06	0.000549009	0.00123615	0	0.000368645	0	0	0	0	0
ZOTU6039	0	0	0	0	0	0.000617438	2.34381e-05	0	0	0	0	0	0	0	0	0	0	0.000963213	3.80161e-05	0	0	0	0	0	0	0	0	0	0	0	0	0	0	6.12073e-05	0.000226823	7.17618e-05	0	0	0.000586319	0	1.96075e-05	0	0	0	0	0	0	0	0
ZOTU8358	3.63346e-05	0	0	0	0	0.000147009	0.00025782	0.000943376	7.1664e-05	0	0	0	0	0	0	0	0	0	0	8.62143e-05	0	0	0	0	0	0	0	0	0	0	0	0	0	0	0.000103101	3.58809e-05	0.000198731	2.04025e-05	0	0	0	5.72292e-05	0.000370238	0	0.000278305	0	0	0	0
ZOTU6511	1.21115e-05	0.00212896	0	0	0	0	0	0	0	0	0	0	0	0	0	0	0	0	0	0	0	0	0.000438066	2.42242e-05	0	0	0	0	0	0	0	0	0	0	0	0	0	0	0	0	0	0	0	0	0	0	0	0	0
ZOTU1531	1.21115e-05	0	0.000647071	0.000144561	0	0	0	0	0	0	0	0	0	0	0	0	0	0	0	0	0	0	6.48987e-05	0.00126773	0.000201309	0.000260983	0	0	0	0	0	0	0	0	0	0	0	0	0	0	0	0	0	0	0	0	0	0	0
ZOTU5819	0	0	0	0	0	0.000147009	8.20335e-05	0	0	0	0	0	0	0	0	0	0	0.000148187	8.87042e-05	0	0	0	0	0	0	0	0	0	0	0	0	0	0	0.00031478	0.00105163	0.000645856	0	0	0.000117264	0	0	0	0	0	0	0	0	0	0
ZOTU8978	0	0	0	0	0	0.000235215	0.000726582	0.000192963	0	4.20663e-05	0	0	0	0	0	0	0	0	0.000202752	0	0	0	0	0	0	0	0	0	0	0	0	0	0	3.93475e-05	0.000453646	0.000197345	0.00018631	7.14089e-05	0	0	0	0	0.000246826	0	0	0	0	0	0
ZOTU7094	0	0	0	0	0	0	0	0	0	0	0	0	0	0	0	0	0	0	0	0	0	0	0	0	0	0.000149133	0.000812198	0.00162863	0	0	0	0	0	0	0	0	0	0	0	0	0	0	0	0	0	0	0	0	0
ZOTU6447	0.000169561	0	0	0	0	0.000617438	0	0	0	0	0	0	0	0	0	0	0	0	0	0	0	0	0	0	0	0	0	0	0	0	0	0	0	0.00013553	0.00076295	0	0	0	0.000899023	0	0	0	0	0	0	0	0	0	0
ZOTU2014	0	0	0	0	0	0	0	0	0	0	0	0	0	0	0	0	0	0	0	0	0	0	0	0	0	0	0	0	7.3577e-05	7.70787e-05	0.000369328	0.00151637	0.000535737	0	0	0	0	0	0	0	0	0	0	0	8.18545e-06	0	0	0	0
ZOTU9724	0	0	0	0	0	0	0	0	7.1664e-05	0.000343541	0	0	0	0	0	0	0	0	0	0	0	0	0	0	0	0	0	0	0	0.000289045	0	0	0	0	0	1.79404e-05	3.7262e-05	9.18114e-05	0	0	0	0.00172832	0	0	0	0	0	0	0
ZOTU3391	0	0	0	0	0	0	0	0	0	0	0	0	0	0	0	0	0	0	0	0	0	0	0	0	0	0	0	0	0	0	0	0.000913838	0.001053	0	0	3.58809e-05	0	0	0	0	0	0	0	0	0	0	6.27989e-05	0	0
ZOTU5638	0	0	0	0	0	0	0.000117191	0.000485982	7.1664e-05	0.000350552	0	0	0	0	0	0	0	0	0	0	0	0	0	0	0	0	0	0	0	0	8.48456e-05	0	5.54211e-05	0	0.000164962	7.17618e-05	0.000496827	0.000377447	0	0	0	0.000160242	0	0	0	0.00013602	0	0	0
ZOTU2281	0	0	0	0	0	0.000117607	7.03144e-05	0	0	0.000119188	0	0	0	0	0	0	0	0	0	0	0	0	0	0	0	0	0	0	0	0.000231236	0	0	0	0	0.000144342	0.000161464	0	4.08051e-05	0	0	0.00168624	0	0	0	0	0	0	0	0
ZOTU9134	0	0.000308544	0	0	0	0.000308719	0.000152348	0	7.1664e-05	0.000112177	0	0	0	0	0	0	0	0	0.000266112	0	0	0	0	0	0	0	0	0	0	9.63484e-05	0	0	0	0	0.000103101	0.000215285	0.000161469	0.00056107	6.51466e-05	0	0	0.00013735	0	0	0	0	0	0	0
ZOTU6114	0	0	0	0	0	0.00188172	7.03144e-05	0	0	0	0	0	0	0	0	0	0	0	3.80161e-05	0	0	0	0	0	0	0	0	0	0	0	0	0	0	0.000424079	0.000144342	0	0	0	0	0	0	0	0	0	0	0	0	0	0
ZOTU4303	0.000109004	0	0	0	0	0.000264616	0	0	0	0	0	0	0	0	0	0	0	0.00129663	0	0	0	0	0	0	0	0	0	0	0	0	0	0	0	6.99512e-05	0.000288684	0.000107643	2.48413e-05	0	0.000390879	0	0	0	0	0	0	0	0	0	0
ZOTU5665	0	0	0	0	0	7.35045e-05	8.20335e-05	0.000164376	0	7.01105e-05	0	0	0	0	0	0	0	0	0.000329473	0	0	0	0	0	0	0	0	0	0.000147154	0.000154157	4.99092e-05	4.01687e-05	9.23685e-05	0	2.06203e-05	8.97022e-05	3.7262e-05	0.000183623	0	0	9.80373e-05	5.72292e-05	0.000850177	0	8.18545e-06	0	0	0	0
ZOTU6707	0	0	0	0	0	0.00048513	1.17191e-05	2.85872e-05	0	0	0	0	0	0	0	0	0	0	0	0	0	0	0	0	0	0	0	0	0	0	0	0	0	2.18597e-05	6.18608e-05	3.58809e-05	6.21033e-05	0	0.00174593	0	0	0	0	0	0	9.06803e-05	0	0	0
ZOTU5657	0	0	0	0	0	0	0	0	0	0	0	0	0	0	0	0	0	0	0.000202752	0	0	0	0	0	0	0	0	0	0	0	0	0	0	0.00017925	0.00117535	0.000789379	0	0.000132617	5.86319e-05	0	0	0	0	0	0	0	0	0	0
ZOTU5146	0	0	0	0	0	0.00199932	2.34381e-05	0	0	0	0	0	0	0	0	0	0	0	0	0	0	0	0	0	0	0	0	0	0	0	0	0	0	0.000109299	6.18608e-05	1.79404e-05	0	0	0.000325733	0	0	0	0	0	0	0	0	0	0
ZOTU5991	0	0	0	0	0	0	4.68763e-05	0.000185816	0.000214992	7.71215e-05	0	0	0	0	0	0	0	0	0	0	0	0	0	0	0	0	0	0	0	0.000211966	0	0.000210886	0	0	0	3.58809e-05	0.000633454	0.000173422	0	0	0.000333327	5.72292e-05	0.000356526	0	0	0	0	0	0
ZOTU1733	0	0	0	0	0	0	0	0	0	8.41326e-05	0	0	0	0	0	0	0	0	0	0	0	0	0	0	0	0	0	0	0.000294308	0.000211966	0.000259528	0.000120506	0.000166263	0	0	5.38213e-05	0	0	0	0	0	0	0	0	0.00105592	0	0	0	0
ZOTU9543	0	0	0	0	0	0.000823251	9.37526e-05	0	0	0	0	0	0	0	0	0	0	0	0	0	0	0	0	0	0	0	0	0	0	0	0	0	0	0.000524634	0.000453646	0.000287047	3.7262e-05	0	0.000267101	0	0	0	0	0	4.09272e-05	0	0	0	0
ZOTU8236	0	0	0	0	0	0	0	7.14679e-05	7.1664e-05	0	0	0	0	0	0	0	0	0	0	0	0	0	0	0	0	0	0	0	5.88616e-05	0	9.98183e-06	3.01265e-05	0	2.62317e-05	0.000123722	7.17618e-05	3.7262e-05	0	0	0	0	0	0	0	0.000163709	0.00131486	0	0	0
ZOTU4594	0	0	0	0	0	1.47009e-05	0.000410167	0.000128642	0.000214992	4.90773e-05	0	0	0	0	0	0	0	0	0	0	0	0	0	0	0	0	0	0	0	5.7809e-05	0	0	0	2.18597e-05	0.000206203	0.00080732	0.000310517	0.000204025	6.51466e-06	0	1.96075e-05	6.8675e-05	0	0	0	0	0	0	0
ZOTU9025	0	0	0	0	0	0	0	2.85872e-05	0	0.000105166	0	0	0	0	0	0	0	0	0	3.44857e-05	1.48282e-05	0	0	0	0	0	0	0	0	1.92697e-05	0.000593919	0.000100422	0.000738948	0	0	1.79404e-05	1.24207e-05	1.02013e-05	0	0	0	5.72292e-05	0	0	0.000392902	0	0	0	0
ZOTU3138	0	0	0	0	0	0	0	7.14679e-05	7.1664e-05	0.000182287	0	0	0	0	0	0	0	0	2.5344e-05	0	0	0	0	0	0	0	0	0	0	9.63484e-05	0	0	0	0	0.000226823	1.79404e-05	2.48413e-05	0.000448856	0.000918567	0	0.000372542	5.72292e-05	0	0	0	0	0	0	0
ZOTU4419	0	0	0	0	0	0	3.51572e-05	0	7.1664e-05	0.000322508	0	0	0	0	0	0	0	0	1.2672e-05	0	0	0	0	0	0	0	0	0	0	0	0	0	0	2.18597e-05	2.06203e-05	0.000179404	2.48413e-05	9.18114e-05	0	0	0.00099998	0.000675304	0	0	5.72981e-05	0	0	0	0
ZOTU7118	0	0	0	0	0	0	0	0	0	0	0	0	0	0	0	0	0	0	0	0	0	0	0	0	0	0	0	0	0	0	0	0	0	0	0	0	0	1.02013e-05	0	0	0	0	0	0	0.00247201	0	0	0	0
ZOTU5365	0.000218007	0	0	0	0	0.000264616	0.000292977	0.000435954	0	0	0	0	0	0	0	0	0	0	3.80161e-05	0	0	0	0	0	0	0	0	0	0	0	9.98183e-06	0	0	0.000126786	0.000350544	0.00039469	0.000136627	0	0	0	0.00023529	0	0	0	0	0	0	0	0
ZOTU1097	0	0	0	0	0	0	0	0	0	0	0	0	0	0	0	0	0	0	0	0	0	0	0	0	0	0	0	0	0	0	0	0	0	0	0	0	0	0	0	0	0	0	0	0	0	0	0.000296052	0	0
ZOTU5142	0	0	0	0	0	0	9.37526e-05	0	0	0	0	0	0	0	0	0	0	0	0.000202752	0	0	0	0	0	0	0	0	0	0	0	0	0	0	9.61829e-05	0.00169086	0.000322928	2.48413e-05	3.06038e-05	3.90879e-05	0	0	0	0	0	0	0	0	0	0
ZOTU5998	0.00122326	0.00019284	0	0	0	0.000367523	0	0	0	0	0	0	0	0	0	0	0	0.000629793	0	0	0	0	0	0	0	0	0	0	0	0	0	0	0	0	8.2481e-05	0	0	0	0	0	0	0	0	0	0	0	0	0	0
ZOTU9249	0	0	0	0	0	0.000264616	0.000234381	0	0	0	0	0	0	0	0	0	0	0	0	0	0	0	8.11234e-06	0	0	0	0	0	0	0	0	0	0	0.000870018	0.000701089	1.79404e-05	0	0	0	0	0.000392149	0	0	0	0	0	0	0	0
ZOTU5368	0	0	0	0	0	0.000426326	4.68763e-05	0	0	0	0	0	0	0	0	0	0	0.00129663	1.2672e-05	0	0	0	0	0	0	0	0	0	0	0	0	0	0	0	0.000350544	0.000197345	0	0	4.56026e-05	0	9.80373e-05	0	0	0	0	0	0	0	0
ZOTU6620	0	0	0	0	0	0.00032342	5.85954e-05	0	0	0	0	0	0	0	0	0	0	0	0	0	0	0	0	0	0	0	0	0	0	0	0	0	0	4.37195e-05	0.0015259	0.000215285	0	0.000306038	0	0	0	0	0	0	0	0	0	0	0
ZOTU4894	3.63346e-05	3.08544e-05	0	0	0	0.000147009	0.000269539	7.14679e-05	0	0	0	0	0	0	0	0	0	0.0005557	1.2672e-05	0	0	0	0	0	0	0	0	0	0	0	0	0	0	8.7439e-06	0.000412405	3.58809e-05	4.96827e-05	0	9.12052e-05	0	5.88224e-05	3.43375e-05	0.000658201	0	0	0	0	0	0
ZOTU9288	0	0	0	0	0	0	0.000140629	0.000814734	0.000143328	0	0	0	0	0	0	0	0	0	3.80161e-05	0.000189672	0	0	0	0	0	0	0	0	0	0	0	0	0	7.43231e-05	0.000515506	0.000287047	8.69446e-05	0.000102013	7.81759e-05	0	0	0	0	0	0	0	0	0	0
ZOTU3184	0	0	0	0	0	7.35045e-05	1.17191e-05	4.28807e-05	0.000143328	1.40221e-05	0	0	0	0	0	0	0	0	0	0	0	0	0	0	0	0	0	0	0	0	0	0	0	0	4.12405e-05	0.000645856	0.000260834	0.000173422	0	0	0	0	0.000822752	0.000235933	0	0	0	0	0
ZOTU1893	6.05576e-05	0.00229094	0	0	0	0	1.17191e-05	0	0	0	0	0	0	0	0	0	0	0	0	0	0	0	5.67864e-05	0	0	0	0	0	0	0	0	0	0	0	0	0	0	0	0	0	0	0	0	0	0	0	0	0	0
ZOTU4104	0.000169561	0.000416535	0	0	0	0.000338121	0.00151176	0.00916933	0.000214992	6.30994e-05	0	0	0	0	0	0	0	0	0.00103911	0.000155186	0	0	0	0	0	0	0	0	0.0001913	0.000289045	0.000244555	0.00149628	0	0	8.2481e-05	3.58809e-05	0.00161469	0.00108133	0.000241042	0.000218402	0.00162742	0.00121326	0.00193347	0.000796272	0	0	0	0	0
ZOTU7414	0	0	0.000302884	0.00215034	0	0	0	0	0	0	0	0	0	0	0	0	0	0	0	0	0	0	0	0	0	0	0	0	0	0	0	0	0	0	0	0	0	0	0	0	0	0	0	0	0	0	0	0	0
ZOTU4980	0	4.62817e-05	0	0	0	0	0	7.14679e-06	0.000429984	0.000161254	0	0	0	0	0	0	0	0	0	0.0001207	0	0	0	0	0	0	0	0	0	0	0.000244555	1.00422e-05	0.000258632	0	0	1.79404e-05	3.7262e-05	0.000214227	0	0	0.00023529	0.000160242	0	0	0.000482942	0	0	0	0
ZOTU4282	0	0	0	0	0	0.000294018	0.000164067	2.14404e-05	0	0	0	0	0	0	0	0	0	0.000296373	0.00019008	0	0	0	0	0	0	0	0	0	0	0	0	0	0	0.000271061	0.00078357	7.17618e-05	0	0	0.000208469	0	0.000137252	1.14458e-05	0	0	0	0	0	0	0
ZOTU2762	0.00135649	0	0	0	0	0	0	0	0	0	0.000457412	0	0	0	0	0	0	0.0005557	1.2672e-05	0	0	0	0	0	0	0	0	0	0	0	0	0	0	0	4.12405e-05	1.79404e-05	0	0	0	0	0	0	0	0	0	0	0	0	0
ZOTU7359	0.00015745	0	0	0	0	0.000220514	2.34381e-05	0.000185816	7.1664e-05	0	0	0	0	0	0	0	0	0	0.000240768	0.000224157	0	0	0	0	0	0	0	0	0	0	0	0	0	2.18597e-05	0.000742329	0.000215285	2.48413e-05	0	0.000306189	0	0	0	0	0	0	0	0	0	0
ZOTU6309	0	0	0	0	0	8.82055e-05	0	0	0	0	0	0	0	0	0	0	0	0	0	0	0	0	0	0	0	0	0	0	0	0	0	0	0	0.00131596	0.000556747	0.000466451	0	0	0	0	0	0	0	0	0	0	0	0	0
ZOTU3270	0	0	0	0	0	0	0	0.00080044	0.000214992	0	0	0	0	0	0	0	0	0	0	0	0	0	0	0	0	0	0	0	7.3577e-05	0	0	0	0	0	2.06203e-05	0	0.000149048	1.02013e-05	0	0	0.000745083	0.000206025	0	0	0.000204636	0	0	0	0
ZOTU4803	0	0	0	0	0	7.35045e-05	9.37526e-05	0.000142936	0.000143328	0.000154243	0	0	0	0	0	0	0	0	0.00012672	0.000293129	0	0	0	0	0	0	0	0	4.41462e-05	0.000115618	6.48819e-05	0	0	0	0	0.000107643	0.000707978	0.000102013	0	0	0	1.14458e-05	0	0.000235933	0	0	0	0	0
ZOTU2728	0	0	0	0	0	0	0	0	0	0	0	0	0	0	0	0	0	0	0	0	0	0	0	0	0	0	0	0	2.94308e-05	0	0	0	0	6.55792e-05	0.00125784	0.00105849	0	0	0	0	0	0	0	0	0	0	0	0	0
ZOTU9509	0	0	0	0	0	0.00124958	8.20335e-05	0	0	0	0	0	0	0	0	0	0	0	0	0	0	0	0	0	0	0	0	0	0	0	0	0	0	0.000288549	4.12405e-05	0	0	0	0.000749186	0	0	0	0	0	0	0	0	0	0
ZOTU8832	0	0	0	0	0	0	0	5.71743e-05	0	0.000315497	0	0	0	0	0	0	0	0	0	0	0	0	0	0	0	0	0	0	0.00113309	0.000192697	0.000374319	0	0	0	0	3.58809e-05	1.24207e-05	0.000112214	0	0	0	0	0	0	0	0	0	0	0
ZOTU2620	0	0	0	0	0	0.000294018	8.20335e-05	0	0	0	0	0	0	0	0	0	0	0.00194495	6.33601e-05	0	0	0	0	0	0	0	0	0	0	0	0	0	0	4.37195e-06	0	1.79404e-05	0	0	0	0	0	0	0	0	0	0	0	0	0
ZOTU2657	0	0	0	0	0	0.000999662	8.20335e-05	0	0	7.01105e-06	0	0	0	0	0	0	0	0	0	0	0	0	0	0	0	0	0	0	0	0	0	0	0	6.99512e-05	0.000226823	0.000251166	0	0	0.000456026	0	0.000313719	0	0	0	0	0	0	0	0
ZOTU5522	0	0	0.000151442	0.00215034	0	0	0	0	0	0	0	0	0	0	0	0	0	0	0	0.000103457	0	0	0	0	0	0	0	0	0	0	0	0	0	0	0	0	0	0	0	0	0	0	0	0	0	0	0	0	0
ZOTU3060	0	0	0	0	0	0.000705644	5.85954e-05	0	0	0	0	0	0	0	0	0	0	0	0	0	0	0	0	0	0	0	0	0	0	0	0	0	0	0.000961829	0.000226823	5.38213e-05	0	0	0.000390879	0	0	0	0	0	0	0	0	0	0
ZOTU1703	0	0	0	0	0	0	0	0	0.000214992	0.00020332	0	0	0	0	0	0	0	0	0	0	0	0	0	0	0	0	0	0	0	9.63484e-05	0	0	0	0	0	3.58809e-05	0.000161469	0.00135677	0	0	0	0.000320483	0	0	0	0	0	0	0
ZOTU8395	0	0	0	0	0	0	0	0	0	0	0	0	0	0	0	0	0	0	0	0	0	0	0	0	0	0	0	0	0	0	0	0	0	0	0	0	0	0	0	0	0	0	0	0	0	0	0	0.00158971	0
ZOTU2296	0	0	0	0	0	0.000220514	1.17191e-05	0	0	0	0	0	0	0	0	0	0	0.000185233	0	0	0	0	0	0	0	0	0	0	0	0	0	0	0	0.000419707	0.000350544	5.38213e-05	0	0	0.00113355	0	0	0	0	0	0	0	0	0	0
ZOTU6485	0	0	0	0	0	0.000411625	0.000164067	0.000485982	7.1664e-05	3.50552e-05	0	0	0	0	0	0	0	0	0	0	0	0	0	0	0	0	0	0	0	3.85394e-05	0.000349364	0.000160675	0	0	4.12405e-05	1.79404e-05	2.48413e-05	0.000132617	0.000436482	0	0	0	0	0	0	0	0	0	0
ZOTU4440	0	0	0	0	0	0.000102906	0.000199224	0.000214404	0.00035832	0.000238376	0	0	0	0	0	0	0	0	0	0	0	0	0	0	0	0	0	0	0.000161869	0.000134888	3.99273e-05	8.03374e-05	3.69474e-05	0	0	0	0.000161469	0.000204025	0	0	0	0	0	0.000427628	8.18545e-06	0	0	0	0
ZOTU2204	0	0	0	0	0	0	0	0	0	0	0	0	0	0	0	0	0	0	0	0	0	0	0	0	6.71028e-05	2.48555e-05	8.61422e-05	0.000196747	0	0	0	0	0	0	0	0	0	0	0	0	0	0	0	0	0	0	0	0	0
ZOTU5244	0	0	0	0	0	0	0	0	0	0	0	0	0	0	0	0	0	0	0	0	0	0	0	0	0	0	0	0	1.47154e-05	0	4.99092e-06	0	0	0	0	0	0	0	0	0	0	0	0	0	7.3669e-05	0.00121285	0	0	0
ZOTU8646	0	0.000671084	0	0	0	0	1.17191e-05	0	0	0	0	0	0	0	0	0	0	0	0	0	0	0	0	0	0	0	0	0	0	0	0	0	0	0	0	0	0	0	0	0	0	0	0	0	0	0	0	0.000156562	0
ZOTU2825	0	0	1.37675e-05	0	0	0	0	0	0	0	0	0	0	0	0	0	0	0	0	0	0	0	0.000535414	0.00167955	4.47352e-05	0	2.46121e-05	6.55824e-05	0	0	0	0	0	0	0	0	0	0	0	0	0	0	0	0	0	0	0	0	0
ZOTU6237	0	0	0	0	0	0.00129368	3.51572e-05	0	0	0	0	0	0	0	0	0	0	0	0	0	0	0	0	0	0	0	0	0	0	0	0	0	0	0.000183622	0.000309304	5.38213e-05	0	0	0.00047557	0	0	1.14458e-05	0	0	0	0	0	0	0
ZOTU4712	0	0	0	0	0	0.0016759	0.000187505	2.14404e-05	0	0	0	0	0	0	0	0	0	0	0	0	0	0	0	0	0	0	0	0	0	0	0	0	0	0.000244829	0.000144342	3.58809e-05	0	0	5.21173e-05	0	0	0	0	0	0	0	0	0	0
ZOTU3074	0	0	0	0	0	0.000102906	0.000316415	0.000300165	0	0.000168265	0	0	0	0	0	0	0	0	0	0	0	0	0	0	0	0	0	0	0.000279593	0.000173427	0	0	0.000166263	0	0	0.000107643	0.000534089	0.000153019	0	0	0	8.01209e-05	0	0.00387814	0	0	0	0	0
ZOTU2282	0	0	0	0	0	0.000294018	5.85954e-05	0	0	0	0	0	0	0	0	0	0	0	0	0	0	0	0	0	0	0	0	0	0	0	0	0	0	0.000187994	0.000680468	3.58809e-05	0	0	0.00109446	0	0	0	0	0	0	0	0	0	0
ZOTU6207	0	0	0	0	0	0.000426326	0	0	0	0	0	0	0	0	0	0	0	0	0	0	0	0	0	0	0	0	0	0	0	0	0	0	0	5.24634e-05	8.2481e-05	1.79404e-05	0	0	0.00177199	0	0	0	0	0	0	0	0	0	0
ZOTU6033	0	0	0	0	0	0.00105847	0	0	0	0	0	0	0	0	0	0	0	0.000574223	2.5344e-05	0	0	0	8.11234e-06	0	0	0	0	0	0	0	0	0	0	0.000236085	6.18608e-05	0.000125583	0	0	0.000254072	0	0	0	0	0	0	0	0	0	0
ZOTU7447	0	0	0	0	0	0	0	0	0.000429984	0.000539851	0	0	0	0	0	0	0	0	0	0	0	0	0	0	0	0	0	0	5.88616e-05	0.000539551	0	0	0	0	0	0.000107643	0	0.000530466	0	0	0	0.00013735	0	0	0	0	0	0	0
ZOTU7968	0	0	0	0	0	0.000455728	0.00025782	0	0	0	0	0	0	0	0	0	0	0	0.000114048	0	0	0	0	0	0	0	0	0	0	0	0	0	0	1.31158e-05	0.00129908	0.000179404	1.24207e-05	0	0	0	0	0	0	0	0	0	0	0	0
ZOTU5292	0	0	0	0	0	0.00127898	0	0	0	0	0	0	0	0	0	0	0	0	0	0	0	0	0	0	0	0	0	0	0	0	0	0	0	0.000813182	0.000185582	5.38213e-05	0	0	0	0	0	0	0	0	0	0	0	0	0
ZOTU4835	0	0	0	0	0	0.000837952	0.000363291	0.000700385	0	0	0	0	0	0	0	0	0	0	0	0	0	0	0	0	0	0	0	0	0	0	0	0	0	0.00013553	0.000206203	3.58809e-05	4.96827e-05	0	0	0	0	0	0	0	0	0	0	0	0
ZOTU2123	0.00190151	0	0	0	0	0	0	0	0	0	0	0	0	0	0	0	0	0.000370466	0	0	0	0	3.24494e-05	2.42242e-05	0	0	0	0	0	0	0	0	0	0	0	0	0	0	0	0	0	0	0	0	0	0	0	0	0
ZOTU3478	0	0	0	0	0	0	8.20335e-05	6.43211e-05	0.000286656	2.10331e-05	0	0	0	0	0	0	0	0	5.06881e-05	0	0	0	0	0	0	0	0	0	2.94308e-05	0.00059736	0	8.03374e-05	0	0	0	0	0.000670716	0.000142818	6.51466e-06	0	0.00023529	5.72292e-05	0	0	0	0	0	0	0
ZOTU5008	0	0	0	0	0	0.000779148	0.00012891	8.57615e-05	0	0	0	0	0	0	0	0	0	0	3.80161e-05	0	0	0	0	0	0	0	0	0	0	1.92697e-05	2.99455e-05	0	0	0.000292921	0.000371165	0.000161464	6.21033e-05	2.04025e-05	0.000286645	0	0	4.57834e-05	0	0	0	0	0	0	0
ZOTU1862	0	0	0	0	0	0	0	0	0	0	0	0	0	0	0	0	0	0	0	0	0	0	0	0	0	0	0	0	0	0	0.000124773	1.00422e-05	0	0	0	0	0	0	0	0	0	0	0	0	0.00217733	0	0	0	0
ZOTU2065	0.00112637	0.0011879	0	0	0	0	0	0	0	0	0	0	0	0	0	0	0	0	0	0	0	0	0	0	0	0	0	0	0	0	0	0	0	0	0	0	0	0	0	0	0	0	0	0	0	0	0	0	0
ZOTU7428	0	7.71361e-06	0	0	0	0	0	1.42936e-05	0.000143328	0.000301475	0	0	0	0	0	0	0	1.85233e-05	1.2672e-05	0.000103457	0	0	0	0	0	0	0	0	4.41462e-05	1.92697e-05	0.000224591	0.00114481	0.000166263	0	0	0	1.24207e-05	1.02013e-05	0	0	0	0	1.37125e-05	5.89831e-05	1.63709e-05	0	0	0	0
ZOTU5084	0	0	0	0	0	0.000455728	1.17191e-05	0	0	0	0	0	0	0	0	0	0	0	0	0	0	0	0	0	0	0	0	0	0	0	0	0	0	0.000870018	0.000659848	5.38213e-05	0	0	0.000254072	0	0	0	0	0	0	0	0	0	0
ZOTU5211	0.00196207	0	0	0	0	0.000117607	0	0	0	0	0	0	0	0	0	0	0	0	0	0	0	0	0	0	0	0	0	0	0	0	0	0	0	0	8.2481e-05	8.97022e-05	0	4.08051e-05	0	0	0	1.14458e-05	0	0	0	0	0	0	0
ZOTU1711	0	0	0	0	0	0	0.000316415	0.00125069	0.000214992	0	0	0	0	0	1.544e-05	0	0	0	0	0	0	0	0	0	0	0	0	0	0	0	0	0	0	0	6.18608e-05	0	0.00018631	0.000255032	0	0	0	0	0	0	0	0	0	0	0
ZOTU9748	0	0	0	0	0	0.000264616	0.000550796	0.000371633	0	3.50552e-05	0	0	0	0	0	0	0	0	0	0	0	0	0	0	0	0	0	0	5.88616e-05	0	0	0	0	0.00015739	0.000453646	0.000161464	6.21033e-05	0.000183623	0	0	0	0	0	0	0	0	0	0	0
ZOTU2895	0	0	0	0	0	0	0	0	0	0	0	0	0	0	0	0	0	0	0	0	0	0	0	0	0	0	0	0	0	0	0	0	0	0	0	0	0	0	0	0	0	0	0	0	0	0	2.69138e-05	0	0
ZOTU9015	0	0	0	0	0	0	1.17191e-05	0	7.1664e-05	0.000224354	0	0	0	0	0	0	0	0	0	0	0	0	0	0	0	0	0	0	4.41462e-05	0.000770787	0.000204628	8.03374e-05	0	3.49756e-05	2.06203e-05	0.000304987	1.24207e-05	0.00047946	0	0	0	3.43375e-05	0	0	0	0	0	0	0
ZOTU8095	0	0	0.000729676	7.22804e-05	0	0	0	0	0	0	0	0	0	0	0	0	0	0	0	0	0	0	0.000713886	0.000121121	4.47352e-05	0	0	0	0	0	0	0	0	0	0	0	0	0	0	0	0	0	0	0	0	0	0	0.000325168	0
ZOTU1446	0	0	0	0	0	0	0	0	0	0	0	0	0	0	0	0	0	0	0	0	0	0	0.00208487	0.000104972	4.47352e-05	4.97111e-05	0	0	0	0	0	0	0	0	0	0	0	0	0	0	0	0	0	0	0	0	0	0	0
ZOTU6639	0	0	0	0	0	0.00105847	0	0	0	0	0	0	0	0	0	0	0	0	0	0	0	0	0	0	0	0	0	0	0	0	0	0	0	0.000559609	0.000474266	0.000107643	0	0	7.16612e-05	0	0	0	0	0	0	0	0	0	0
ZOTU6216	0	0	0	0	0	2.94018e-05	0	0	0	2.10331e-05	0	0	0	0	0	0	0	0	0	0	0	0	0	0	0	0	0	0	2.94308e-05	3.85394e-05	0	0	0	2.18597e-05	0.00125784	0.000735558	2.48413e-05	0.000112214	0	0	0	0	0	0	0	0	0	0	0
ZOTU9443	0	9.25633e-05	0	0	0	2.94018e-05	1.17191e-05	5.71743e-05	0.000143328	7.71215e-05	0	0	0	0	0	0	0	0	0.00012672	0.000310372	0	0	0	0	0	0	0	0	0	0	9.98183e-06	0	0	0	2.06203e-05	3.58809e-05	0.000111786	2.04025e-05	0	5.20005e-06	0	0.000366267	0.000699339	0.000132712	0	0	0	0	0
ZOTU6019	0.000411792	0	0	0	0	0.000352822	0.000199224	5.71743e-05	0	0	0	0	0	0	0	0	0	0	7.60321e-05	0	0	0	0	0	0	0	0	0	0	0	0	0	0	0.000183622	0.000639228	0.000233226	2.48413e-05	0	8.46906e-05	0	0	0	0	0	0	0	0	0	0
ZOTU1716	0	0	0	0	0	2.94018e-05	8.20335e-05	0	7.1664e-05	0	0	0	0	0	0	0	0	0	0	0	0	0	0	0	0	0	0	0	0	9.63484e-05	0	0	0	0	0	1.79404e-05	6.21033e-05	3.06038e-05	0	0.00187202	0	0	0	0	0	0	0	0	0
ZOTU7243	0.000884141	0	0	0	0	0	0	0	0	0	0	0	0	0	0	0	0	0.00137073	0	0	0	0	0	0	0	0	0	0	0	0	0	0	0	0	0	0	0	0	0	0	0	0	0	0	0	0	0	0	0
ZOTU6000	0	0	0	0	0	0.000191112	0.00012891	3.57339e-05	0	0	0	0	0	0	0	0	0	0.00072241	7.60321e-05	0	0	0	8.11234e-05	0	0	0	0	0	0	0	0	0	0	4.37195e-05	0.000288684	0.000161464	0.000198731	0	0.000325733	0	0	0	0	0	0	0	0	0	0
ZOTU6285	0	0	0	0	0	0	0	0	0	0	0	0	0	0	0	0	0	0	0	0	0	0	0	0	0	0	0	0	0	0	0	0	0	0	0	0	0	0	0	0	0	0	0	0	0	0	0	0.000337211	0
ZOTU7037	0	0	0	0	0	0	0	0	0.00107496	4.20663e-05	0	0	0	0	0	0	0	0	0	0	0	0	0	0	0	0	0	0	0.000691624	0	0.000239564	6.02531e-05	0.000110842	0	0	0	0	3.06038e-05	0	0	0	0	0	0	0	0	0	0	0
ZOTU7392	0	0.000169699	0	0	0	0.000102906	0.0002461	0.000100055	0	0	0	0	0	0	0	0	0	0.000148187	0.000430849	0.000206914	0	0	0	0	0	0	0	0	0	0	0	0	0	0	0.000350544	0.000340868	0	4.08051e-05	1.9544e-05	0	0	9.15667e-05	0	0	0	0	0	0	0
ZOTU5184	0	0	0	0	0	0.000249915	0	0	0	0	0	0	0	0	0	1.43497e-05	0	0	0	0	0	0	0	0	0	0	0	0	0	0	0	0	0	0.00101866	6.18608e-05	0.000735558	0	0	0.000162866	0	0	0	0	0	0	0	0	0	0
ZOTU2341	0	0	0	0	0	0.00138189	3.51572e-05	0	0	0	0	0	0	0	0	0	0	0	0.000139392	0	0	0	0	0	0	0	0	0	0	0	0	0	0	0.000249201	0.000329924	5.38213e-05	0	0	5.21173e-05	0	0	0	0	0	0	0	0	0	0
ZOTU2454	0	0.000694225	6.88373e-05	0	0	0	0	0	0	0	0	0	0	0	0	0	0	0	0	6.89715e-05	0	0	0.00114384	4.03737e-05	0	0	0.000221508	0	0	0	0	0	0	0	0	0	0	0	0	0	0	0	0	0	0	0	0	0	0
ZOTU6390	0	0	0	0	0	0.00016171	0	0	0	0	0	0	0	0	0	0	0	0	0	0	0	0	0	0	0	0	0	0	0	0	0	0	0	0.00172692	0.000247443	0	0	0	9.77199e-05	0	0	0	0	0	0	0	0	0	0
ZOTU5712	0	0	0	0	0	0	9.37526e-05	0	0.000143328	8.41326e-05	0	0	0	0	0	0	0	0	0.000304129	0	0	0	0	0	0	0	0	0	5.88616e-05	0.000134888	4.49182e-05	3.01265e-05	1.84737e-05	0	2.06203e-05	0.000125583	0.000298096	5.10064e-05	0	0	0	0.000171688	0	0.000648814	0	0	0	0	0
ZOTU5374	0	0	0	0	0	0	9.37526e-05	0	0	0	0	0	0	0	0	0	0	0	2.5344e-05	0	0	0	0	0	0	0	0	0	0	0	0	0	0	0.000371616	0.00119597	0.000538213	0	0	0	0	0	0	0	0	0	0	0	0	0
ZOTU7217	0	0	0	0	0	0	0	0	7.1664e-05	7.71215e-05	0	0	0	0	0	0	0	0	0	0	0	0	0	0	0	0	0	0	0.000397316	0.000655169	1.99637e-05	0.000682868	0	0	0	0.000197345	2.48413e-05	1.02013e-05	0	0	0	0	0	0	0	0	0	0	0
ZOTU6001	0	0	0	0	0	0.000352822	0.00012891	5.00275e-05	0	0	0	0	0	0	0	0	0	0.00066684	0	0	0	0	0	0	0	0	0	0	0	0	0	0	0	0.000389103	0.000164962	5.38213e-05	0	0	0.000416938	0	0	0	0	0	0	0	0	0	0
ZOTU1819	0.000581353	0	0	0	0	0	7.03144e-05	0.000271578	0	0	0	0	0	0	0	0	0	0	0.000811009	0	0	0	0	0	0	0	0	0	0	0	0	0	0	0	0.000164962	0.000233226	7.4524e-05	0	0	0	0	0	0	0	0	0	0	0	0
ZOTU5685	2.4223e-05	0.000146559	0	0	0	0	0	0	0	0	0	0	0	0	0	0	0	0	0.000329473	0.0016898	0	0	0	0	0	0	0	0	0	0	0	0	0	0	0	0	2.48413e-05	0	0	0	0	0	0	0	0	0	0	0	0
ZOTU2479	0	0	0	0	0	0.000690943	7.03144e-05	0	0	0	0	0	0	0	0	0	0	0	0	0	0	0	0	0	0	0	0	0	0	0	0	0	0	0.000476542	0.000226823	7.17618e-05	0	0	0.000677524	0	0	0	0	0	0	0	0	0	0
ZOTU4343	0	0	0	0	0	0	0	0	0	0	0	0	0	0	0	0	0	0	0	0	0	0	0	0	0	0	0	0	0	0	0	0	0	1.31158e-05	0.000742329	0.000197345	1.24207e-05	0	0.000599349	0	0.000647046	0	0	0	0	0	0	0	0
ZOTU3194	0	0	0	0	0	0	0	0	0	0	0	0	0	0	0	0	0	0	0	0	0	0	0	0	0	0	0	0	0	0.0012718	0.000244555	0.000612573	7.38948e-05	0	0	0	0	0	0	0	0	0	0	0	0	0	0	0	0
ZOTU2931	0	0	0	0	0	0.000426326	3.51572e-05	5.71743e-05	0	0	0	0	0	0	0	0	0	0.0005557	0	0	0	0	0	0	0	0	0	0	0	0	0	0	0	0.000144274	0.000433025	0.000143524	3.7262e-05	0	3.90879e-05	0	0	0	0	0.000339153	0	0	0	0	0
ZOTU7099	0	0	0	0	0	0.000999662	3.51572e-05	0	0	0	0	0	0	0	0	0	0	0	0	0	0	0	0	0	0	0	0	0	0	0	0	0	0	0.000970572	6.18608e-05	0	0	0	0.000143322	0	0	0	0	0	0	0	0	0	0
ZOTU2299	0	0	0.00170717	9.03506e-05	0	0	0	0	0	0	0	0	0	0	0	0	0	0	0	0.000344857	0	0	3.24494e-05	3.2299e-05	0	0	0	0	0	0	0	0	0	0	0	0	0	0	0	0	0	0	0	0	0	0	0	0	0
ZOTU2704	0	0	0	0	0	2.94018e-05	4.68763e-05	7.14679e-05	0	2.10331e-05	0	0	0	0	0	0	0	0	0	0	0	0	0	0	0	0	0	0	0	5.7809e-05	0	1.00422e-05	0	0	4.12405e-05	0.000107643	6.21033e-05	8.16102e-05	0	0	0	1.14458e-05	0	0.00166627	0	0	0	0	0
ZOTU6013	0	0	0	0	0	0	0	0	0	0	0	0	0	0	0	0	0	0.0013522	0.000291457	0.000293129	0	0	0	0	0	0	0	0	0.000103008	0	0	0	0.000166263	0	0	0	0	0	0	0	0	0	0	0	0	0	0	0	0
ZOTU6305	0	0	0	0	0	0.000176411	0	0	0	0	0	0	0	0	0	0	0	0.00107435	5.06881e-05	0	0	0	0	0	0	0	0	0	0	0	0	0	0	4.37195e-05	0.000453646	5.38213e-05	0	0	0.000345277	0	0	0	0	0	0	0	0	0	0
ZOTU4071	0	0	0	0	0	0.00119077	0.00012891	0.000278725	0	0	0	0	0	0	0	0	0	0	0	0	0	0	0	0	0	0	0	0	0	0	0	0	0	0.000209853	8.2481e-05	0.000143524	0.000111786	0	4.56026e-05	0	0	0	0	0	0	0	0	0	0
ZOTU2912	0	0	0	0	0	5.88036e-05	0.000105472	1.42936e-05	0	0	0	0	0	0	0	0	0	0	2.5344e-05	0	0	0	0	0	0	0	0	0	4.41462e-05	9.63484e-05	2.49546e-05	0	0	4.37195e-06	0.000226823	0.000125583	0.000161469	9.18114e-05	0	0.000431604	3.92149e-05	0	0.000740477	0	0	0	0	0	0
ZOTU8023	0	0	0	0	0	8.82055e-05	7.03144e-05	0	0	0	0	0	0	0	0	0	0	0	0	0	0	0	0	0	0	0	0	0	0	0	0	0	0	0.000118043	0.000866051	0.000609975	0	0	0	0	0.000431364	0	0	0	0	0	0	0	0
ZOTU3358	0	0	0	0	0	0	0.000164067	0.000121495	0.000143328	0	0	0	0	0	0	0	0	0	8.87042e-05	5.17286e-05	0	0	0	0	0	0	0	0	0	1.92697e-05	0	0	0	0	0.000123722	0.000161464	8.69446e-05	0.000550869	1.30293e-05	0	0	0.000206025	0.000452514	0	0	0	0	0	0
ZOTU6206	0	0	0	0	0	0.000882055	2.34381e-05	0	0	0	0	0	0	0	0	0	0	0.000407513	0	0	0	0	0	0	0	0	0	0	0	0	0	0	0	0.000104927	0.000329924	0.000125583	0	0	0.000299674	0	0	0	0	0	0	0	0	0	0
ZOTU4988	0	0	0	0	0	0.000940858	0	0	0	0	0	0	0	0	0	0	0	0	0	0	0	0	0	0	0	0	0	0	0	0	0	0	0	3.49756e-05	0.000103101	1.79404e-05	0	0	0.00107492	0	0	0	0	0	0	0	0	0	0
ZOTU1442	0	0.00376424	0	0	0	0	0	0	0	0	0	0	0	0	0	0	0	0	0	0	0	0	0.00111139	0.000686353	0	0	0	0	0	0	0	0	0	0	0	0	0	0	0	0	0	0	0	0	0	0	0	0	0
ZOTU5748	0.000181673	0	0	0	0	0.000396925	0	0	0	0	0	0	0	0	0	0	0	0	0	0	0	0	0	0	0	0	0	0	0	0	0	0	0	8.7439e-05	0.000309304	3.58809e-05	0.000546509	1.02013e-05	0.000592834	0	0	0	0	0	0	0	0	0	0
ZOTU8099	8.47807e-05	0	0	0	0	0	0	0	0	0	0	0	0	0	0	0	0	0.00164858	0.000329473	0	0	0	8.92357e-05	8.07474e-06	0	0	0	0	0	0	0	0	0	0	0	0	0	0	0	0	0	0	0	0	0	0	0	0	0
ZOTU2262	0.00209529	6.17089e-05	0	0	0	0	0	0	0	0	0	0	0	0	0	0	0	0	0	0	0	0	0	0	0	0	0	0	0	0	0	0	0	0	0	0	0	0	0	0	0	0	0	0	0	0	0	0	0
ZOTU4707	0	0	0	0	0	0.00108787	0	0.000214404	0	0	0	0	0	0	0	0	0	0	1.2672e-05	0	0	0	0	0	0	0	0	0	0	0	0	0	0	0.000227341	0.000164962	7.17618e-05	0.000198731	3.06038e-05	0.000143322	0	0	0	0	0	0	0	0	0	0
ZOTU6490	0.00071458	0	0	0	0	0.000837952	0	0	0	0	0	0	0	0	0	0	0	0.000259326	1.2672e-05	0	0	0	0	0	0	0	0	0	0	0	0	0	0	3.93475e-05	4.12405e-05	0.000107643	0	0	0.000136808	0	0	0	0	0	0	0	0	0	0
ZOTU7656	0	0	0	0	0	0.000411625	1.17191e-05	0	0	0	0	0	0	0	0	0	0	0	0	0	0	0	0	0	0	0	0	0	0	0	0	0	0	0	0.00154652	0.000179404	0	0	0	0	0	0	0	0	0	0	0	0	0
ZOTU8806	0	0	0	0	0	0.000514532	0.00025782	7.14679e-06	0	0	0	0	0	0	0	0	0	0	0	0	0	0	0	0	0	0	0	0	0	0	0	0	0	0.000463426	0.000494886	0.000287047	0	0	0.000123779	0	0	0	0	0	0	0	0	0	0
ZOTU3099	0.000218007	0.000231408	0	0	0	0.000338121	8.20335e-05	0.000478835	7.1664e-05	7.01105e-05	0	0	0	0	0	0	0	0	0	0.000275886	0	0	0	0	0	0	0	0	0	0	0	0	0	0	0.000103101	0.000161464	0.000111786	0	0	0	0	0	0	0	0	0	0	0	0
ZOTU5358	0	0	0	0	0	0.000147009	0	7.86147e-05	0	0	0	0	0	0	0	0	0	0.00050013	3.80161e-05	0	0	0	0	0	0	0	0	0	0	0	0	0	0	0.000104927	0	1.79404e-05	3.7262e-05	0	0.000742671	0	0.000470579	0	0	0	0	0	0	0	0
ZOTU3934	0	0	0	0	0	2.94018e-05	3.51572e-05	7.14679e-06	0	0	0	0	0	0	0	0	0	0	0	0	0	0	0	0	0	0	0	0	0	0	0	0	0	0.000249201	0.0012166	0.000592034	0	0	6.51466e-06	0	0	0	0	0	0	0	0	0	0
ZOTU5777	0	0	0	0	0	0.000102906	0.000855492	0.000185816	0	0	0	0	0	0	0	0	0	0	0	0	0	0	0	0	0	0	0	0	0	0.000732248	0	0	0	0	2.06203e-05	8.97022e-05	0	0	0	0	0	0.000148796	0	0	0	0	0	0	0
ZOTU4681	0	0	0	0	0	0	0	0	0	0	0	0	0	0	0	0	0	0	0	0	0	0	0	0	0	0	0	0	1.47154e-05	0	0	0	0	0	0	0.00209903	0	2.04025e-05	0	0	0	0	0	0	0	0	0	0	0
ZOTU6147	0	0	0	0	0	0.000426326	0	3.57339e-05	0	0	0	0	0	0	0	0	0	0.000926166	0	0	0	0	0	0	0	0	0	0	0	0	0	0	0	0	0.000123722	3.58809e-05	0	0	0.000586319	0	0	0	0	0	0	0	0	0	0
ZOTU5406	0	0	0	0	0	0	1.17191e-05	0.000157229	0.000143328	2.80442e-05	0	0	0	0	0	0	0	0	0	0	0	0	0	0	0	0	0	0	0.000250162	9.63484e-05	3.49364e-05	0	0	0	0	5.38213e-05	0.000273255	0.000193824	0	0	0	0.000114458	0	0.000766781	0	0	0	0	0
ZOTU6696	0	0	0	0	0	0.000205813	0.00118363	0.000128642	0	0	0	0	0	0	0	0	0	0	0.00012672	0	0	0	0	0	0	0	0	0	5.88616e-05	0	5.9891e-05	0	0	0	0.000206203	0.000161464	0	0	0	0	0	0	0	0	0	0	0	0	0
ZOTU1491	6.05576e-05	0.00204411	0	0	0	0	0	0	0	0	0	0	0	0	0	0	0	0	0	0	0	0	8.11234e-06	0	0	0	0	0	0	0	0	0	0	0	0	1.79404e-05	0	0	0	0	0	0	0	0	0	0	0	0	0
ZOTU7687	0	0	0	0	0	5.88036e-05	0.000328134	0.000214404	7.1664e-05	4.20663e-05	0	0	0	0	0	0	0	0	5.06881e-05	0	0	0	0	0	0	0	0	0	2.94308e-05	5.7809e-05	0.000299455	0	0	0.000126786	0.000123722	0.000287047	0.000273255	0.00016322	0	0	0	0	0	0	0	0	0	0	0
ZOTU7652	0	0	0	0	0	0.000382224	7.03144e-05	5.00275e-05	7.1664e-05	7.01105e-06	0	0	0	0	0	0	0	0	0	0	0	0	0	0	0	0	0	0	0	0	0	0	0	0	0.000433025	5.38213e-05	4.96827e-05	3.06038e-05	0.000201954	0	0.000764691	1.14458e-05	0	0	0	0	0	0	0
ZOTU2291	0	0	0	0	0	0.00101436	2.34381e-05	0	0	0	0	0	0	0	0	0	0	0	0	0	0	0	0	0	0	0	0	0	0	0	0	0	0	0.000432823	0.000350544	0.000161464	0	0	0.000143322	0	0	0	0	0	0	0	0	0	0
ZOTU5892	0	0	0	0	0	0.000602737	3.51572e-05	0	0	0	0	0	0	0	0	0	0	0	0	0	0	0	0	0	0	0	0	0	0	0	0	0	0	0.000384731	0.000494886	3.58809e-05	0	0	0.000566775	0	0	0	0	0	0	0	0	0	0
ZOTU5394	0	0	0	0	0	0.00105847	0.000164067	8.57615e-05	0	0	0	0	0	0	0	0	0	0.000314896	3.80161e-05	0	0	0	0	0	0	0	0	0	0	0	0	0	0	5.24634e-05	0.000103101	0.000107643	0	0	0.00019544	0	0	0	0	0	0	0	0	0	0
ZOTU2981	0	0	0	0	0	7.35045e-05	0.000140629	7.86147e-05	0	0	0	0	0	0	0	0	0	0.00129663	0.000240768	0	0	0	0	0	0	0	0	0	0	0	0	0	0	0	4.12405e-05	0.000161464	8.69446e-05	0	0	0	0	0	0	0	0	0	0	0	0
ZOTU5487	0	0	0	0	0	0.00064684	0.000164067	0.000271578	0	0	0	0	0	0	0	0	0	0	1.2672e-05	0	0	0	0	0	0	0	0	0	0	0	0	0	0	0.000568353	0.000226823	5.38213e-05	1.24207e-05	0	0.000136808	0	1.96075e-05	0	0	0	0	0	0	0	0
ZOTU7764	0	0	0	0	0	0	3.51572e-05	0	0	0.000182287	0	0	0	0	0	0	0	0	0	0	0	0	0	0	0	0	0	0	0	0.000231236	0	0	0	0	0	3.58809e-05	1.24207e-05	0.000173422	0	0	0	0.00144218	0	0	0	0	0	0	0
ZOTU8547	0	0	0	0	0	0.000617438	0.000550796	0.000150083	0	0	0	0	0	0	0	0	0	0	0	0	0	0	8.11234e-06	0	0	0	0	0	0	0	0	0	0	6.55792e-05	0.000144342	0.000251166	0	0	6.51466e-06	0	0.000137252	0.000160242	0	0	0	0	0	0	0
ZOTU4790	0	0	0	0	0	0	0	0	0	0.000168265	0	0	0	0	0	0	0	0	0	0	0	0	0	0	0	0	0	0	0.0001913	0.0014645	8.98365e-05	0	0	0	0	7.17618e-05	0	0.000122415	0	0	0	0	0	0	0	0	0	0	0
ZOTU4983	0	0	0	0	0	0.000558635	0.000164067	0.000157229	0.000214992	0	0	0	0	0	0	0	0	0	6.33601e-05	0	0	0	0	0	0	0	0	0	0	0	6.98728e-05	0	0	0.000297292	0.000103101	0.000233226	0.000124207	5.10064e-05	0	0	0	6.8675e-05	0	0	0	0	0	0	0
ZOTU2942	0	0	0	0	0	0.000235215	0	0	0	0	0	0	0	0	0	0	0	0	0	0	0	0	0	0	0	0	0	0	0	0	0	0	0	0.000769463	0.000412405	0.000125583	0	0	0.000560261	0	0	0	0	0	0	0	0	0	0
ZOTU5662	0	0	0	0	0	7.35045e-05	0.000492201	0.000278725	0.000143328	3.50552e-05	0	0	0	0	0	0	0	0	0	0	0	0	0	0	0	0	0	0	0.000103008	0	9.98183e-06	2.00844e-05	0	2.18597e-05	8.2481e-05	0.000161464	0.000223572	0.000275434	1.30293e-05	0	1.96075e-05	5.72292e-05	0	8.84747e-05	0	0	0	0	0
ZOTU4378	0	0	0	0	0	0	0.00012891	7.14679e-06	0	7.71215e-05	0	0	0	0	0	0	0	0	0.000861698	0.000258643	0	0	0	0	0	0	0	0	0	0	0	0	0	0	0	3.58809e-05	0.000173889	2.04025e-05	0	0	0.000411757	0.000114458	0	0	0	0	0	0	0
ZOTU3602	0.000508684	0	0	0	0	0	0	0	0	0	0	0	0	0	0	0	0	0.000314896	0.000114048	0	0	0	0	0	0	0	0	0	0	0	0	0	0	0	0.000701089	0.000448511	0	0	0	0	0	0	0	0	0	0	0	0	0
ZOTU6499	4.84461e-05	0	0	0	0	0.000411625	0.000210943	7.14679e-06	0	0	0	0	0	0	0	0	0	0	0	0	0	0	0	0	0	0	0	0	0	0	0	0	0	0.000131158	6.18608e-05	0.000143524	0.000248413	0	3.90879e-05	0	0.000784298	0	0	0	0	0	0	0	0
ZOTU5504	2.4223e-05	0	0	0	0	0	2.34381e-05	0	0	0	0	0	0	0	0	0	0	0.001982	5.06881e-05	0	0	0	0	0	0	0	0	0	0	0	0	0	0	4.37195e-06	0	0	0	0	0	0	0	0	0	0	0	0	0	0	0
ZOTU5203	0	0	0	0	0	0.000220514	0.000667987	5.71743e-05	0.000143328	2.10331e-05	0	0	0	0	0	0	0	0	7.60321e-05	0	0	0	0	0	0	0	0	0	0	0	0	0	0	0.000345384	6.18608e-05	3.58809e-05	0.000111786	4.08051e-05	0	0	0	0.000297592	0	0	0	0	0	0	0
ZOTU9640	0	0	0	0	0	0.000308719	0	0	7.1664e-05	0	0	0	0	0	0	0	0	0	0	0	0	0	0	0	0	0	0	0	0	0	0	0	0	0.000253573	0.000412405	0.000125583	0	8.16102e-05	0.00037785	0	0.000333327	0	0	0	0.000114596	0	0	0	0
ZOTU1749	0	0	0	0	0	0	0	0	0	4.20663e-05	0	0	0	0	0	0	0	0	0	0	0	0	0	0	0	0	0	0	0	0	0	0	0	0	0	0	2.48413e-05	2.04025e-05	0	0	0	0.000103013	0	0	0	0	0	0	0
ZOTU1808	0	0	0	0	0	0	0	0	0	0	0	0	0	0	0	0	3.1503e-05	0	0	0	0	0	0	0	0	0	0	0	0	0	0	0	0	0	0	0	0	0	0	0	0	0	0	0	0	0	0.0010317	0.000433557	0
ZOTU4986	2.4223e-05	0	0	0	0	0.000308719	1.17191e-05	0	0	0	0	0	0	0	0	0	0	0.000685363	0	0	0	0	0	0	0	0	0	0	0	0	0	0	0	4.80914e-05	0.000680468	0.000304987	0	0	1.30293e-05	0	0	0	0	0	0	0	0	0	0
ZOTU2729	0	0	0	0	0	0	0	0	0	0	0	0	0	0	0	0	0	0.00188938	6.33601e-05	0	0	0	0	0	0	0	0	0	0	0	0	0	0	0	0.000123722	0	0	0	0	0	0	0	0	0	0	0	0	0	0
ZOTU5999	0	0	0	0	0	0.000102906	0	0	0	0	0	0	0	0	0	0	0	0.000870596	3.80161e-05	0	0	0	0	0	0	0	0	0	0	0	0	0	0	0.000257945	4.12405e-05	8.97022e-05	0	0	0.00018241	0	0.000490186	0	0	0	0	0	0	0	0
ZOTU5547	0.0010537	0	0	0	0	0.000279317	0	0	0	0	0	0	0	0	0	0	0	0.000407513	0	0	0	0	0	0	0	0	0	0	0	0	0	0	0	7.43231e-05	4.12405e-05	1.79404e-05	0	0	0.00019544	0	0	0	0	0	0	0	0	0	0
ZOTU2618	0	0	0	0	0	0	0	0	0	4.90773e-05	0	0	0	0	0	0	0	0	0	0	0	0	0	0	0	0	0	0	0	0.000443203	0	0.000893754	0.000535737	0	0	0.000143524	0	0	0	0	0	0	0	0	0	0	0	0	0
ZOTU5862	4.84461e-05	0.000115704	0	0	0	0	0	0	0	0.000217343	0	0	0	0	0	0	0	0	0	0	0	0	0	0	0	0	0	0	0.000176585	0.000134888	2.99455e-05	0	0	0	0	0.000125583	1.24207e-05	9.18114e-05	0	0	0	2.28917e-05	0	0	0.000933141	0	0	0	0
ZOTU3322	0	0	0	0	0	0.00141129	8.20335e-05	0	0	0	0	0	0	0	0	0	0	0	0	0	0	0	0	0	0	0	0	0	0	0	0	0	0	0	0.000123722	3.58809e-05	0	0	0	0	0.000411757	0	0	0	0	0	0	0	0
ZOTU7183	0	0	0	0	0	0.000779148	0.000105472	0	0	0	0	0	0	0	0	0	0	0	1.2672e-05	0	0	0	0	8.07474e-06	0	0	0	0	2.94308e-05	0	0	0	0	3.06036e-05	0.000515506	0.000233226	2.48413e-05	0	6.51466e-05	0	3.92149e-05	0	0	0.000221187	0	0	0	0	0
ZOTU7364	0	0	0	0	0	0.000573335	2.34381e-05	0	0	0	0	0	0	0	0	0	0	0	0	0	0	0	0	0	0	0	0	0	0	0	0	0	0	0.000939969	0.000226823	5.38213e-05	0	0	0.000241042	0	0	0	0	0	0	0	0	0	0
ZOTU2040	0.00204685	0	0	0	0	0	0	0	0	0	0	0	0	0	0	0	0	0	0	0	0	0	0	0	0	0	0	0	0	0	0	0	0	0	0	0	0	0	0	0	0	0	0	0	0	0	0	0	0
ZOTU3232	0.000133227	0	0	0	0	0	0	0	0	0	0	0	0	0	0	0	0	0.0019079	0	0	0	0	1.62247e-05	0	0	0	0	0	0	0	0	0	0	0	0	0	0	0	0	0	0	0	0	0	0	0	0	0	0
ZOTU8905	0	0	0	0	0	0.00080855	9.37526e-05	2.14404e-05	7.1664e-05	0	0	0	0	0	0	0	0	0	0	0	0	0	0	0	0	0	0	0	0	0	0	0	0	1.31158e-05	0.000556747	0.000269107	4.96827e-05	0	9.12052e-05	0	7.84298e-05	0	0	0	0	0	0	0	0
ZOTU6425	0.000363346	0.00168928	0	0	0	0	0	0	0	0	0	0	0	0	0	0	0	0	0	0	0	0	0	0	0	0	0	0	0	0	0	0	0	0	0	0	0	0	0	0	0	0	0	0	0	0	0	0	0
ZOTU4915	0	0	0	0	0	0	0	0	0	7.01105e-05	0	0	0	0	0	0	0	0	0	0	0	0	0	0	0	0	0	0	0	0	0	0.000682868	0	0	0	0	0	0	0	0	0	0	0	0	4.91127e-05	0.00124685	0	0	0
ZOTU3151	0	0	0	0	0	0	0	0	0	0	0	0	0	0	0	0	0	0	0	0	0	0	0.00201186	2.42242e-05	0	0	0	0	0	0	0	0	0	0	0	0	0	0	0	0	0	0	0	0	0	0	0	0	0
ZOTU9737	0.000654022	0	0	0	0	0.000294018	0	0	0	0	0	0	0	0	0	0	0	0.000685363	0	0	0	0	0	0	0	0	0	0	0	0	0	0	0	8.7439e-05	0.000103101	0	0	0	0.000214984	0	0	0	0	0	0	0	0	0	0
ZOTU4622	0	0	0	0	0	0	4.68763e-05	0.00022155	0	0	0	0	0	0	0	0	0	0	5.06881e-05	0.000465557	0	0	0	0	0	0	0	0	0.000176585	7.70787e-05	4.99092e-06	2.00844e-05	0	3.06036e-05	2.06203e-05	0.000143524	7.4524e-05	2.04025e-05	0	0	0	0	0.000685627	0	0	0	0	0	0
ZOTU6577	4.84461e-05	0	0	0	0	5.88036e-05	1.17191e-05	0	0	0	0	0	0	0	0	0	0	0	0	0	0	0	0	0	0	0	0	0	0	0	0	0	0	0	0.000164962	0	0	0	0.00122476	0	0.000529401	0	0	0	0	0	0	0	0
ZOTU6136	0	0	0	0	0	0	0	0	0	0	0	0	0	0	0	0	0	0.00146334	0	0	0	0	0	0	0	0	0	0	0	0	0	0	0	0	0	0	0	0	0.00057329	0	0	0	0	0	0	0	0	0	0
ZOTU2712	0	0	0	0	0	0	0.000492201	8.57615e-05	0.000143328	0	0	0	0	0	0	0	0	0	2.5344e-05	0	0	0	0	0	0	0	0	0	0	0	0	0	0	0.000432823	0.000515506	0.000233226	7.4524e-05	3.06038e-05	0	0	0	0	0	0	0	0	0	0	0
ZOTU5043	0	0	0	0	0	0.000176411	8.20335e-05	9.29082e-05	7.1664e-05	2.80442e-05	0	0	0	0	0	0	0	0	1.2672e-05	0	0	0	0	0	0	0	0	0	0.000206016	0.000115618	0.000878401	0	0.000110842	4.37195e-06	4.12405e-05	0.000125583	1.24207e-05	6.12076e-05	1.30293e-05	0	0	0	0	0	0	0	0	0	0
ZOTU8525	0	0	0	0	0	0.000720345	0.00050392	3.57339e-05	0	0	0	0	0	0	0	0	0	0	0.000177408	0	0	0	0	0	0	0	0	0	0	0	0	0	0	0.000131158	0.000185582	3.58809e-05	0.000149048	9.18114e-05	0	0	0	0	0	0	0	0	0	0	0
ZOTU3249	9.68922e-05	0	0	0	0	1.47009e-05	0	0	0	0	0	0	0	0	0	0	0	0	1.2672e-05	0	0	0	0	0	0	0	0	0	0	0	0	0	0	0.000686396	2.06203e-05	0	0	0	0.0011987	0	0	0	0	0	0	0	0	0	0
ZOTU4393	0	0	0	0	0	0.000984961	0.000292977	0.00020011	0	0	0	0	0	0	0	0	0	0	0	0	0	0	0	0	0	0	0	0	1.47154e-05	0	4.99092e-06	0	0	0	0.000185582	0.000215285	3.7262e-05	0	9.12052e-05	0	0	0	0	0	0	0	0	0	0
ZOTU2732	0	0	0	0	0	0	0	0	0	0	0	0	0	0	0	0	0	0	0	0	0	0	0.00193074	8.07474e-05	0	0	0	0	0	0	1.49727e-05	0	0	0	0	0	0	0	0	0	0	0	0	0	0	0	0	0	0
ZOTU6360	0	0	0	0	0	0.000720345	0.000105472	0	0	0	0	0	0	0	0	0	0	0	3.80161e-05	5.17286e-05	0	0	0	0	0	0	0	0	0	0	0	0	0	0.000375988	0.000494886	0.000233226	0	0	6.51466e-06	0	0	0	0	0	0	0	0	0	0
ZOTU2387	0	0.000107991	6.88373e-05	0	0	0	0	0	0	0	0	0	0	0	0	0	0	0	0	0	0	0	0.00167114	0.000177644	0	0	0	0	0	0	0	0	0	0	0	0	0	0	0	0	0	0	0	0	0	0	0	0	0
ZOTU1948	0	0	0	0	0	0	0	0	0.000214992	0.000574906	0	0	0	0	0	0	0	0	0	0	0	0	0	0	0	0	0	0	0.000132439	5.7809e-05	7.48637e-05	7.02952e-05	7.38948e-05	0	0	0.000340868	1.24207e-05	0.000428453	1.30293e-05	0	0	2.28917e-05	0	0	8.18545e-06	0	0	0	0
ZOTU4533	0	0	0	0	0	0.000117607	0	0	0	0	0	0	0	0	0	0	0	0	0	0	0	0	0	0	0	0	0	0	0	0	0	0	0	0.000826298	0.000845431	0	0	0	0.000234528	0	0	0	0	0	0	0	0	0	0
ZOTU7989	0	0	0	0	0	0	2.34381e-05	0	7.1664e-05	7.01105e-06	0	0	0	0	0	0	0	0	0	0	0	0	0	0	0	0	0	0	0	0	0	0	0	0	0	0	0	0	0	0	0	0	0	0	0	0.000510077	0.000520333	0.000252908	0
ZOTU2916	0.000121115	0	0	0	0	0	0	0	0	0	0	0	0	0	0	0	0	0.00157448	0.000304129	0	0	0	0	0	0	0	0	0	0	0	0	0	0	0	0	0	0	0	1.9544e-05	0	0	0	0	0	0	0	0	0	0
ZOTU4767	0	0	0	0	0	0	0	0	0	2.80442e-05	0	0	0	0	0	0	0	0	0	0	0	0	0	0	0	0	0	0	0	5.7809e-05	0	0.000582446	0.00134858	0	0	0	0	0	0	0	0	0	0	0	0	0	0	0	0
ZOTU4307	0	0	0.000454326	0.000307192	0	0	0	0	0	0	0	0	0	0	0	0	0	0	0	0	0	0	0.000194696	8.88221e-05	0	2.48555e-05	0	0	0	0	0	0	0	0	0	0	0	0	0	0	0	0	0	0	0	0	0.00028708	0.000578076	0
ZOTU8121	0.000545019	0.00145016	1.37675e-05	0	0	0	0	0	0	0	0	0	0	0	0	0	0	0	0	0	0	0	0	0	0	0	0	0	0	0	0	0	0	0	0	0	0	0	0	0	0	0	0	0	0	0	0	0	0
ZOTU5530	0.00087203	0.000593948	0	0	0	5.88036e-05	4.68763e-05	0.000242991	0.000143328	0	0	0	0	0	0	0	0	0	0	0	0	0	0	0	0	0	0	0	2.94308e-05	0	1.99637e-05	0	0	0	0	0	0	0	0	0	0	0	0	0	0	0	0	0	0
ZOTU7319	0	0	0	0	0	0.00110257	0	0	0	0	0	0	0	0	0	0	0	0	0	0	0	0	0	0	0	0	0	0	0	0	0	0	0	0.000196738	0.000556747	0.000143524	0	0	0	0	0	0	0	0	0	0	0	0	0
ZOTU4651	0	0	0	0	0	0.000235215	0.000187505	0	0.000214992	0	0	0	0	0	0	0	0	0	0	0	0	0	0	0	0	0	0	0	0	0	0	0	0	0	0.000536127	0.000287047	7.4524e-05	7.14089e-05	0	0	0.000392149	0	0	0	0	0	0	0	0
ZOTU4829	0	0	0	0	0	0	0	0	0	7.71215e-05	0	0	0	0	0	0	0	0	0	0.000862143	0	0	0	0	0	0	0	0	0.0001913	7.70787e-05	0.000429219	4.01687e-05	0	0	0	5.38213e-05	9.93653e-05	0	0	0	0	0	0	0	8.18545e-06	0.000158691	0	0	0
ZOTU8761	0	0	0	0	0	0	0	0	0.000501648	0.000280442	0	0	0	0	0	0	0	0	0	0	0	0	0	0	0	0	0	0	0	7.70787e-05	0	0	0	0	0	0.000215285	0.000248413	0.000255032	0	0	0	0.000400604	0	0	0	0	0	0	0
ZOTU1363	0	0.00197468	0	0	0	0	0	0	0	0	0	0	0	0	0	0	0	0	0	0	0	0	0	0	0	0	0	0	0	0	0	0	0	0	0	0	1.24207e-05	0	0	0	0	0	0	0	0	0	0	0	0
ZOTU9200	0	0	0	0	0	0.000984961	4.68763e-05	0	0	0	0	0	0	0	0	0	0	0.000240803	0	0	0	0	0	0	0	0	0	0	0	0	0	0	0	9.18109e-05	0.000103101	0.000304987	2.48413e-05	0	0.000188925	0	0	0	0	0	0	0	0	0	0
ZOTU4511	0	0	0	0	0	0	4.68763e-05	0	0	0	0	0	0	0	0	0	0	0.00122254	0.000240768	0	0	0	0	0	0	0	0	0	0	0	0	0	0	0	0.000185582	0.000215285	7.4524e-05	0	0	0	0	0	0	0	0	0	0	0	0
ZOTU4119	0.000169561	0.0011339	0	1.80701e-05	0	0	0	0	0	0	0	0	0	0	0	0	0	0	0	0	0	0	0.000365055	0.000298765	0	0	0	0	0	0	0	0	0	0	0	0	0	0	0	0	0	0	0	0	0	0	0	0	0
ZOTU4773	0	0	0	0	0	0.000102906	0	0	0	0	0	0	0	0	0	0	0	0	0	0	0	0	0	0	0	0	0	0	0	0	0	0	0	0.00144711	0.000350544	0	0	0	8.46906e-05	0	0	0	0	0	0	0	0	0	0
ZOTU4448	0	0	0	0	0	0	0	8.57615e-05	0.000143328	9.81547e-05	0	0	0	0	0	0	0	0	0	0	0	0	0	0	0	0	0	0	8.82924e-05	0.000115618	0.000254537	2.00844e-05	0	0	0	3.58809e-05	0.000248413	0.000408051	0	0.000176802	0	0.000160242	0	0.000132712	0	0	0	0	0
ZOTU4088	0	0	0	0	0	0	0	0	7.1664e-05	0.000455718	0	0	0	0	0	0	0	0	0	0	0	0	0	0	0	0	0	0	0	0.00125253	0	0	0	0	0	0.000179404	0	2.04025e-05	0	0	0	0	0	0	0	0	0	0	0
ZOTU3036	0	0	0	0	0	0	5.85954e-05	0	0	7.01105e-06	0	0	0	0	0	0	0	0	5.06881e-05	0	0	0	0	0	0	0	0	0	0.000529755	0.000250506	0	0	0	0	0	0	3.7262e-05	0	0	0	0	0	0	0.000973222	0	0	0	0	0
ZOTU2859	0.000205896	0	0	0	0	0	2.34381e-05	0	0	0	0	0	0	0	0	0	0	0.00155596	0.00019008	0	0	0	0	0	0	0	0	0	0	0	0	0	0	0	0	0	0	0	0	0	0	0	0	0	0	0	0	0	0
ZOTU5272	0	0	0	0	0	0.000867354	2.34381e-05	0	0	0	0	0	0	0	0	0	0	0	0	0	0	0	0	0	0	0	0	0	0	0	3.99273e-05	0	0	0.000773835	0.000226823	3.58809e-05	0	0	0	0	0	0	0	0	0	0	0	0	0
ZOTU2804	0	0	0.000509396	0.00142754	0	0	0	0	0	0	0	0	0	0	0	0	0	0	0	0	0	0	0	2.42242e-05	0	0	0	0	0	0	0	0	0	0	0	0	0	0	0	0	0	0	0	0	0	0	0	0	0
ZOTU4504	7.26691e-05	0	0	0	0	0	0.000222662	0.000157229	0	2.80442e-05	0	0	0	0	0	0	0	0.000703886	8.87042e-05	0	0	0	0	0	0	0	0	0	2.94308e-05	1.92697e-05	0	0	0	0	8.2481e-05	0.000143524	7.4524e-05	0.000102013	1.30293e-05	2.08002e-05	0.000137252	0	5.48501e-05	1.47458e-05	0	0	0	0	0
ZOTU7189	0	0	0	0	0	0.00080855	0	0	0	0	0	0	0	0	0	0	0	0	0	0	0	0	0	0	0	0	0	0	0	0	0	0	0	0.000835042	0.000164962	0	0	0	0.000156352	0	0	0	0	0	0	0	0	0	0
ZOTU6157	0	0	0	0	0	0.000294018	0	0	0	0	0	0	0	0	0	0	0	0.00061127	6.33601e-05	0	0	0	0	0	0	0	0	0	0	0	0	0	0	9.61829e-05	2.06203e-05	1.79404e-05	0	0	0.000859935	0	0	0	0	0	0	0	0	0	0
ZOTU5836	0	0	0	0	0	0	0.00037501	0.000278725	0	0	0	0	0	0	0	0	0	0	0	0	0	0	0	0	0	0	0	0	0	0	0	0	0	0	0.000226823	3.58809e-05	0.000136627	0.000326441	0	0	0.000411757	0.000171688	0	0	0	0	0	0	0
ZOTU5570	0.00169561	0	0	0	0	0	0	7.14679e-06	0	0	0	0	0	0	0	0	0	0.000259326	0	0	0	0	0	0	0	0	0	0	0	0	0	0	0	0	0	0	0	0	0	0	0	0	0	0	0	0	0	0	0
ZOTU4337	0	0	0	0	0	7.35045e-05	0.000105472	0	0	0	0	0	0	0	0	0	0	0	0	0	0	0	0	0	0	0	0	0	0	0	0	0	0	4.37195e-05	0.000226823	0.000269107	2.48413e-05	0	0.000175896	0	0.0010392	0	0	0	0	0	0	0	0
ZOTU8710	0	0	0	0	0	0.000382224	8.20335e-05	0.000235844	0.00035832	0.000343541	0	0	0	0	0	0	0	0	0	0	0	0	0	0	0	0	0	0	0	0	0	0	0	3.93475e-05	6.18608e-05	7.17618e-05	0.000223572	0.000153019	0	0	0	0	0	0	0	0	0	0	0
ZOTU8774	0	0	0	0	0	0.000940858	0	0	0	0	0	0	0	0	0	0	0	0	0	0	0	0	0	0	0	0	0	0	0	0	0	0	0	2.18597e-05	0.000185582	0.000269107	2.48413e-05	0	0.000508143	0	0	0	0	0	0	0	0	0	0
ZOTU3815	0.000375457	0	0	0	0	0	0	0	0	0	0	0	0	0	0	0	0	0.00146334	2.5344e-05	0	0	0	3.24494e-05	8.07474e-06	0	0	0	0	0	0	0	0	0	0	4.12405e-05	0	0	0	0	0	0	0	0	0	0	0	0	0	0
ZOTU6616	0	0	0	0	0	0.000205813	0.00025782	0	0	0	0	0	0	0	0	0	0	0	1.2672e-05	0.000189672	0	0	0	0	0	0	0	0	4.41462e-05	5.7809e-05	0	0	0	3.93475e-05	0.000433025	0.000233226	0.000161469	1.02013e-05	0.000104235	0	0.000196075	0	0	0	0	0	0	0	0
ZOTU5410	0	0	0	1.80701e-05	0	0	5.85954e-05	1.42936e-05	7.1664e-05	0.000238376	0	0	0	0	0	0	0	0	0	8.62143e-05	0	0	8.11234e-06	0	0	0	0	0	0	0.000134888	3.49364e-05	0	0.00084979	0	0	0	3.7262e-05	0.000112214	0	0	0	0.0002747	0	0	0	0	0	0	0
ZOTU2408	0	0	0	0	0	0	0	0	0	0	0	0	0	0	0	0	0	0	0	0	0	0	0	0	0	0	0	0	8.82924e-05	1.92697e-05	0	0.000130548	0.000332527	0	0	1.79404e-05	0	0	0	0	0	0	0	0	0	0.00134887	0	0	0
ZOTU5902	0	0	0	0	0	0.000147009	0.000433606	0.000428807	7.1664e-05	0	0	0	0	0	0	0	0	0	3.80161e-05	0	0	0	0	0	0	0	0	0	1.47154e-05	0	0	0	0	0.000148646	0.000144342	0.000161464	0.000136627	3.06038e-05	0	0	0.00015686	2.28917e-05	0	0	0	0	0	0	0
ZOTU9572	0	0	0	0	0	2.94018e-05	4.68763e-05	0.001558	0	0	0	0	0	0	0	0	0	0	0	0	0	0	0	0	0	0	0	0	0	0	0	0	0	0	4.12405e-05	3.58809e-05	0.000211151	1.02013e-05	0	0	0	0	0	0	0	0	0	0	0
ZOTU7773	0	0	0	0	0	1.47009e-05	0	0	0	0.000287453	0	0	0	0	0	0	0	0	0	0	0	0	0	0	0	0	0	0	0	0	0	0	0	0	0	1.79404e-05	0	0.00016322	0	0	0	0.000286146	0	0	9.00399e-05	0.000510077	0	0	0
ZOTU3097	0	0	0	0	0	7.35045e-05	0	0	0	0	0	0	0	0	0	0	0	0.00183381	2.5344e-05	0	0	0	0	0	0	0	0	0	0	0	0	0	0	0	0	0	0	0	0	0	0	0	0	0	0	0	0	0	0
ZOTU3248	0	0	0	0	0	0	7.03144e-05	6.43211e-05	0	0	0	0	0	0	0	0	0	0	0	0	0	0	0	0	0	0	0	0	0	0	0	0	0	3.06036e-05	0.00158776	0.000179404	0	0	0	0	0	0	0	0	0	0	0	0	0
ZOTU1602	0	0	0	0	0	0.000117607	0	0	0	0	0	0	0	0	0	0	0	0	0	0	0	0	0	0	0	0	0	0	0	0	0	0	0	0.00123726	0.000433025	1.79404e-05	0	0	0.000123779	0	0	0	0	0	0	0	0	0	0
ZOTU2164	0	0	0	0	0	4.41027e-05	0	0	0	0	0	0	0	0	0	0	0	0	0	0	0	0	0	0	0	0	0	0	0	0	0	0	0	5.24634e-05	0	0	0	0	0.00183062	0	0	0	0	0	0	0	0	0	0
ZOTU4402	0	0	0	0	0	0.000882055	0.000140629	0	0	0	0	0	0	0	0	0	0	0	0	0	0	0	0	0	0	0	0	0	0	0	0	0	0	4.80914e-05	0.000515506	0.000107643	0	0	0.000228013	0	0	0	0	0	0	0	0	0	0
ZOTU2105	0	0.000169699	0	0	0	0	0.0012305	0.000350193	0	0	0	0	0	0	0	0	0	0	0.000101376	1.72429e-05	0	0	0	0	0	0	0	0	0	0	0	0	0	0	0	0	3.7262e-05	1.02013e-05	0	0	0	0	0	0	0	0	0	0	0
ZOTU7142	2.4223e-05	0	0	0	0	0.000764447	7.03144e-05	0	0	0	0	0	0	0	0	0	0	0	0	0	0	0	0	0	0	0	0	0	0	0	0	0	0	0.000244829	0.000536127	0.000233226	0	2.04025e-05	1.9544e-05	0	0	0	0	0	0	0	0	0	0
ZOTU2867	0	0	0	0	0	0.000690943	0	0	0	0	0	0	0	0	0	0	0	0	0	0	0	0	0	0	0	0	0	0	0	0	0	0	0	0.000887505	8.2481e-05	5.38213e-05	0	0	0.00019544	0	0	0	0	0	0	0	0	0	0
ZOTU5083	0.00106581	0	0	0	0	4.41027e-05	2.34381e-05	0	0	0	0	0	0	0	0	0	0	0.00061127	2.5344e-05	0	0	0	5.67864e-05	0	0	0	0	0	0	0	0	0	0	0	8.2481e-05	0	0	0	0	0	0	0	0	0	0	0	0	0	0
ZOTU2782	0	0	0	0	0	0	0	0	0	0	0	0	0	0	0	0	0	0.000259326	0	0	0	0	0	0	0	0	0	0	0	0	0	0	0	0.000389103	0.00113411	0.000125583	0	0	0	0	0	0	0	0	0	0	0	0	0
ZOTU4732	0	0	0	0	0	0.000264616	0.000351572	0	0	0	0	0	0	0	0	0	0	0.000259326	6.33601e-05	0	0	0	0	0	0	0	0	0	0	0	0	0	0	3.49756e-05	0.000597987	0.000322928	0	0	0	0	0	1.14458e-05	0	0	0	0	0	0	0
ZOTU6663	0	0.000231408	0	0	0	0.000308719	0.000140629	0	0	4.90773e-05	0	0	0	0	0	0	0	0	0	0	0	0	0	0	0	0	0	0	0	0	0	0	0	0.000104927	0.000618608	0.000197345	0	5.10064e-05	0.000130293	0	3.92149e-05	0	2.74251e-05	0	0	0	0	0	0
ZOTU1981	0	0	0	0	0	0	4.68763e-05	0	0	7.01105e-06	0	0	0	0	0	0	0	0	0	0	0	0	0	0	0	0	0	0	0	0	0	0	0	1.31158e-05	6.18608e-05	0	1.24207e-05	0	0	0.00174722	0	0	0	0	0	0	0	0	0
ZOTU6350	0	0	0	0	0	0.000264616	4.68763e-05	0	0	0	0	0	0	0	0	0	0	0	0	0	0	0	0	0	0	0	0	0	0	0	0	0	0	4.37195e-05	0.000453646	0.000753498	0	0.000255032	7.81759e-05	0	0	0	0	0	0	0	0	0	0
ZOTU1620	0	7.71361e-06	0	0	0	0	0	0	0	0	0	0	0	0	0	0	0	0	0	0	0	0	0.000705774	0.00164725	0	0	0	0	0	0	0	0	0	0	0	0	0	0	0	0	0	0	0	0	0	0	0	0	0
ZOTU2791	0	0	0	0	0	0	2.34381e-05	0	0	0	0	0	0	0	0	0	0	0.000685363	2.5344e-05	0	0	0	0	0	0	0	0	0	0	0	0	0	0	4.80914e-05	0.000721709	0.000358809	2.48413e-05	0	0	0	0	0	0	0	0	0	0	0	0
ZOTU4657	0	0	0	0	0	0.000852653	0	0	0	0	0	0	0	0	0	0	0	0	0	0	0	0	0	0	0	0	0	0	0	0	0	0	0	0.0003585	0.000494886	0.000107643	0	0	7.16612e-05	0	0	0	0	0	0	0	0	0	0
ZOTU7293	0	0	0	0	0	0	0	0	0	7.01105e-05	0	0	0	0	0	0	0	0	0	0	0	0	0	0	0	0	0	0	0.000279593	0.000366124	0.0001647	0.000200844	0	8.7439e-06	0	1.79404e-05	0	8.16102e-05	0	0	0	0	0	0	0.0004502	0	0	0	0
ZOTU9630	0.00162294	0	0	0	0	0	0	0	0	0	0	0	0	0	0	0	0	0	0	0	0	0	0.000202808	5.65232e-05	0	0	0	0	0	0	0	0	0	0	0	0	0	0	0	0	0	0	0	0	0	0	0	0	0
ZOTU9631	0	0	0	0	0	0	0.00112503	0.000107202	0	0	0	0	0	0	0	0	0	0	0	0	0	0	0	0	0	0	0	0	0	0	0	0	0	8.3067e-05	0.000103101	1.79404e-05	0.00037262	0	7.16612e-05	0	0	0	0	0	0	0	0	0	0
ZOTU2875	6.05576e-05	0	0	0	0	0	0.000433606	7.86147e-05	7.1664e-05	0	0	0	0	0	0	0	0	0.000203757	8.87042e-05	0	0	0	0	0	0	0	0	0	0	0	0	0	0	0	0.000123722	0.000322928	0.000260834	5.10064e-05	0	0	0	0.000183133	0	0	0	0	0	0	0
ZOTU4702	0	0	0	0	0	0	0	0	0	0	0	0	0	0	0	0	0	0.00181529	3.80161e-05	0	0	0	0	0	0	0	0	0	0	0	0	0	0	0	0	0	2.48413e-05	0	0	0	0	0	0	0	0	0	0	0	0
ZOTU6887	0	0	0	0	0	0.000117607	0.000117191	0.000150083	7.1664e-05	2.10331e-05	0	0	0	0	0	0	0	0	0	0	0	0	0	0	0	0	0	0	0.00111837	3.85394e-05	0	0	0	1.74878e-05	2.06203e-05	0.000179404	2.48413e-05	0	0	0	0	0	0	0	0	0	0	0	0
ZOTU8179	0	0	0	0	0	0	0	0	0	0	0	0	0	0	0	0	0	0	0	0	0	0	0	0	0	0	0	0	0	0	0	0	0	0.00119791	0.000639228	3.58809e-05	0	0	0	0	0	0	0	0	0	0	0	0	0
ZOTU2191	0	0	0	0	0	0	0	0	0	0	0	0	0	0	0	0	0	0	0	0	0	0	1.62247e-05	0.000193794	0.000134206	0.00130492	3.69181e-05	0.000185817	0	0	0	0	0	0	0	0	0	0	0	0	0	0	0	0	0	0	0	0	0
ZOTU6210	0	0	0	0	0	0	0.000105472	3.57339e-05	7.1664e-05	7.01105e-05	0	0	0	0	0	0	0	0	0	1.72429e-05	0	0	0	0	0	0	0	0	1.47154e-05	0.00057809	0	0	0	0	0	0	0	8.16102e-05	0	0	0	0.000114458	0	0.000781526	0	0	0	0	0
ZOTU6060	0	0	0	0	0	5.88036e-05	4.68763e-05	0.000271578	0.000214992	0.000231365	0	0	0	0	0	0	0	0.000129663	0.000304129	1.72429e-05	0	0	0	0	0	0	0	0	0	0	0	0	0	1.31158e-05	6.18608e-05	0.000233226	2.48413e-05	2.04025e-05	1.9544e-05	0	0.000117645	0.000103013	0	0	0	0	0	0	0
ZOTU2445	0	0	0	0	0	0	0	0	0.000143328	8.41326e-05	0	0	0	0	0	0	0	0	0	0	0	0	0	0	0	0	0	0	0.000161869	0	0	0	0	0	2.06203e-05	3.58809e-05	3.7262e-05	0.000193824	0	0	0	1.14458e-05	0	0.00117966	0	0	0	0	0
ZOTU2702	0	0	0	0	0	0	0	0	0	0	0	0	0	0	0	0	0	0	0	0	0	0	8.11234e-06	0	0.000525639	0.000472255	0.000369181	0.000491868	0	0	0	0	0	0	0	0	0	0	0	0	0	0	0	0	0	0	0	0	0
ZOTU5032	0	0	0	0	0	0	0.000175786	0.000335899	0.000143328	0	0	0	0	0	0	0	0	0	0	0	0	0	0	0	0	0	0	0	0	0	0	0	0	5.24634e-05	4.12405e-05	0.000430571	0.000459565	0.000102013	0	0	0	0.000125904	0	0	0	0	0	0	0
ZOTU1670	0	0.00133445	0	0	0	0	0	0	0	0	0.000505561	0	0	0	0	0	0	0	0	0	0	0	1.62247e-05	0	0	0	0	0	0	0	0	0	0	0	0	0	0	0	0	0	0	0	0	0	0	0	0	0	0
ZOTU6224	0	0	0	0	0	0.00016171	0	0	0	2.10331e-05	0	0	0	0	0	0	0	0	7.60321e-05	0	0	0	0	0	0	0	0	0	0	0	0	0	0	3.49756e-05	0.000144342	0.000843201	6.21033e-05	7.14089e-05	0	0	0	0	0	0.00028017	0	0	0	0	0
ZOTU5878	0	0	0	0	0	0	0	0	0	3.50552e-05	0	0	0	0	0	0	0	0	0	0	0	0	0	0	0	0	0	0	7.3577e-05	0	0.000179673	0.000120506	0.000517264	0	0	0	0	0	0	0	0	0	0	0	8.18545e-06	0.000680102	0	0	0
ZOTU4452	0	0	0	0	0	0	0	0	0	0	0	0	0	0	0	0	0	0.00177824	7.60321e-05	0	0	0	0	0	0	0	0	0	0	0	0	0	0	0	0	0	0	0	0	0	0	0	0	0	0	0	0	0	0
ZOTU4304	0	0	0	0	0	0.000102906	0.000187505	0.000393073	0.000143328	0	0	0	0	0	0	0	0	0	3.80161e-05	0	0	0	0	0	0	0	0	0	0	0	0	0	0	0.00020111	0.000123722	8.97022e-05	0	0.000102013	0	0	0	0	0	0.000471865	0	0	0	0	0
ZOTU4467	2.4223e-05	0	0	0	0	7.35045e-05	0	0	0	0	0	0	0	0	0	0	0	0.00125959	0	0	0	0	0	0	0	0	0	0	0	0	0	0	0	0	0.000185582	7.17618e-05	1.24207e-05	0	0.000221498	0	0	0	0	0	0	0	0	0	0
ZOTU6235	0	0	0	0	0	8.82055e-05	0	0	0.000429984	0.000364575	0	0	0	0	0	0	0	0	0	0	0	0	0	0	0	0	0	0	0.000132439	5.7809e-05	0	0	0.00014779	0	2.06203e-05	7.17618e-05	8.69446e-05	0.000183623	0	0	0	0.000263254	0	0	0	0	0	0	0
ZOTU3777	0.00151394	0.000146559	0	0	0	0	0	2.14404e-05	0	0	0	0	0	0	0	0	0	0	0	0	0	0	0	0	0	0	0	0	1.47154e-05	0	0	0	0	0	4.12405e-05	7.17618e-05	0	0	3.25733e-05	0	0	0	0	0	0	0	0	0	0
ZOTU8619	0	0	0	0	0	0	0	0	0.000143328	9.11436e-05	0	0	0	0	0	0	0	0	0	0	0	0	0	0	0	0	0	0	0	0	0	0	0	0	0	0	0.000124207	0.000775297	3.25733e-05	0	0.000627439	4.57834e-05	0	0	0	0	0	0	0
ZOTU2411	0	0	0	0	0	2.94018e-05	2.34381e-05	0	0	0	0	0	0	0	0	0	0	0	0	0	0	0	0	0	0	0	0	0	0	0	0	0	0	0	2.06203e-05	0	1.24207e-05	0	0	0.00174722	0	0	0	0	0	0	0	0	0
ZOTU6394	0	0	0	0	0	0.000617438	0	0	0	0	0	0	0	0	0	0	0	0	0	0	0	0	0	0	0	0	0	0	0	0	0	0	0	0.000738859	0.000103101	0.000179404	0	0	0.000188925	0	0	0	0	0	0	0	0	0	0
ZOTU4296	0.000145338	0	0	0	0	0.000543934	0.000234381	0.000214404	0	0	0	0	0	0	0	0	0	0	0	0	0	0	0	0	0	0	0	0	0	0	0	0	0	0.000104927	0.000494886	8.97022e-05	0	0	0	0	0	0	0	0	0	0	0	0	0
ZOTU5567	0.000738803	0.00019284	0	0	0	8.82055e-05	2.34381e-05	0	0	7.01105e-06	0	0	0	0	0	0	0	0	1.2672e-05	0	0	0	0	0	0	0	0	0	0	0	0	0	0	9.18109e-05	0.000515506	7.17618e-05	0	0	8.46906e-05	0	0	0	0	0	0	0	0	0	0
ZOTU1692	0	0	0	0	0	5.88036e-05	0	0	0	0	0	0	0	0	0	0	0	0	0	0	0	0	0	0	0	0	0	0	0	0	0	0	0	0.00106676	0.000618608	0	0	0	7.81759e-05	0	0	0	0	0	0	0	0	0	0
ZOTU4845	0	0	0	0	0	0.000102906	0.000515639	9.29082e-05	0	0	0	0	0	0	0	0	0	0	0.000177408	0	0	0	0	0	0	0	0	0	0	0	0	0	0	0	0.000144342	8.97022e-05	0.000124207	0	0	0	0	0	0	0.000575086	0	0	0	0	0
ZOTU5068	0	0	0	0	0	0.000720345	0	0	0	0	0	0	0	0	0	0	0	0	0	0	0	0	0	0	0	0	0	0	0	0	0	0	0	0.000205482	0.000680468	7.17618e-05	0	0	0.000143322	0	0	0	0	0	0	0	0	0	0
ZOTU4540	0	0	0	0	0	0.000396925	0	0	0	0	0	0	0	0	0	0	0	0	0	0	0	0	0	0	0	0	0	0	0	0	0	0	0	0.000870018	0.000103101	3.58809e-05	0	0	0.000410423	0	0	0	0	0	0	0	0	0	0
ZOTU2881	0	0	0	0	0	0	0	0	0	0	0	0	0	0	0	0	0	0	0	0	0	0	0	0	0	0	0	0	0	0	0	0	0	0	0	0	0	0	0	0	0	0	0	0	0	0	0.00105861	0.000276995	0
ZOTU4455	0	0	0	0	0	0	0	0	0.000286656	0.000119188	0	0	0	0	0	0	0	0	0	0	0	0	0	0	0	0	0	0	0.000573901	0.000231236	0.000319419	0	0	0	0	5.38213e-05	8.69446e-05	5.10064e-05	0	0	0	0	0	0	5.72981e-05	0	0	0	0
ZOTU3377	0	0	0	0	0	0.000279317	9.37526e-05	0	0	0	0	0	0	0	0	0	0	0	0	0	0	0	0	0	0	0	0	0	0	0	0	0	0	0	0.00101039	0.000430571	0	0	0	0	0	0	0	0	0	0	0	0	0
ZOTU8361	0	0	0	0	0	0.000543934	0.000328134	1.42936e-05	0	0	0	0	0	0	0	0	0	0	6.33601e-05	0	0	0	0	0	0	0	0	0	0	0	0	0	0	5.24634e-05	0.000288684	0.000233226	0.000149048	0.000112214	2.60586e-05	0	0	0	0	0	0	0	0	0	0
ZOTU4392	0	0	0	0	0	0	0.000105472	0.000142936	0	0	0	0	0	0	0	0	0	0	0	0	0	0	0	0	0	0	0	0	0	0	0	0	0	7.43231e-05	0.000618608	0.000448511	8.69446e-05	0.000112214	0	0	0	0	0	0.000221187	0	0	0	0	0
ZOTU5578	0	0	0	0	0	0.000279317	0.000457044	0.000142936	7.1664e-05	0	0	0	0	0	0	0	0	0	0.000164736	0	0	0	0	0	0	0	0	0	0	0	2.49546e-05	0	0	0	2.06203e-05	3.58809e-05	3.7262e-05	0	0	0	0.000529401	4.57834e-05	0	0	0	0	0	0	0
ZOTU2866	0	0	0	0	0	7.35045e-05	0	0	0	0	0	0	0	0	0	0	0	0.00116697	3.80161e-05	0	0	0	0	0	0	0	0	0	0	0	0	0	0	0.000288549	0.000144342	0	0	0	9.77199e-05	0	0	0	0	0	0	0	0	0	0
ZOTU2395	0	0	0	0	0	0	0	5.00275e-05	0.000143328	0.000168265	0	0	0	0	1.544e-05	0	0	0	0	0	0	0	0	0	0	0	0	0	0	0.000192697	0	0	0	0	0	5.38213e-05	0	0.000153019	0	0	0	0.00041205	0	0.000619323	0	0	0	0	0
ZOTU1302	0	0	0	0	0	0	0	0	0	0	0	0	0	0	0	0	0	0	0	0	0	0	0	0	0	0	0	0	0	0	0	0	0	0.00151269	0.000123722	5.38213e-05	0	0	0.000117264	0	0	0	0	0	0	0	0	0	0
ZOTU2097	0.00170772	0	0	0	0	0	0	0	0	0	0	0	0	0	0	0	0	0	0	0	0	0	8.92357e-05	8.07474e-06	0	0	0	0	0	0	0	0	0	0	0	0	0	0	0	0	0	0	0	0	0	0	0	0	0
ZOTU1980	0	0	0	0	0	0	0	0	0	3.50552e-05	0	0	0	0	0	0	0	0	0	0	0	0	0	0	0	0	0	0	0	0	0.00146234	0	0	1.31158e-05	0	5.38213e-05	0	0	0	0	0	1.14458e-05	0	0	9.00399e-05	0	0	0	0
ZOTU2929	0	0.000524525	0	0	0	0	0	0	0	0	0.00122779	0	0	0	0	0	0	0	0	0	0	0	2.4337e-05	2.42242e-05	0	0	0	0	0	0	0	0	0	0	0	0	0	0	0	0	0	0	0	0	0	0	0	0	0
ZOTU8318	0	0	0	0	0	0	0	0	0.000214992	8.41326e-05	0	0	0	0	0	0	0	0	0	0	0	0	0	0	0	0	0	0	0	0	0	0	0	0	0	0	0.000211151	9.18114e-05	0	0	0	0.00013735	0.000836464	0.000221187	0	0	0	0	0
ZOTU3049	0	0	0	0	0	0	0	0	0	0	0	0	0	0	0	0	0	0	0	0	0	0	0	0	0	0	0	0	0	0	0	0.000150633	0.00164416	0	0	0	0	0	0	0	0	0	0	0	0	0	0	0	0
ZOTU8963	0.000799361	0	0	0	0	0.000279317	1.17191e-05	0	0	0	0	0	0	0	0	0	0	0.000518653	0	0	0	0	8.11234e-06	0	0	0	0	0	0	0	0	0	0	0	0	5.38213e-05	2.48413e-05	0	9.77199e-05	0	0	0	0	0	0	0	0	0	0
ZOTU2163	0	0	0	0	0	0	0	0	0	0	0	0	0	0	0	0	0	0	0	0	0	0	0	0	0	0	0	0	0	0	0	0	0	0	2.06203e-05	3.58809e-05	0	0	0	0.00173682	0	0	0	0	0	0	0	0	0
ZOTU2988	0	0	0	0	0	0	0	1.42936e-05	0	0	0	0	0	0	0	0	0	0.00177824	0	0	0	0	0	0	0	0	0	0	0	0	0	0	0	0	0	0	0	0	0	0	0	0	0	0	0	0	0	0	0
ZOTU5787	0	0	0	0	0	0.000690943	0	0	0	0	0	0	0	0	0	0	0	0	0	0	0	0	0	0	0	0	0	0	0	0	0	0	0	0.000402219	4.12405e-05	0	0	0	0.00065798	0	0	0	0	0	0	0	0	0	0
ZOTU2574	0	1.54272e-05	5.50699e-05	0	0	0	0	0	0	0	0	0	0	0	0	0	0	0	0	1.72429e-05	4.94274e-06	0	7.30111e-05	1.61495e-05	0	0	0	0	0	0	0	0	0	0	0	0	0	0	0	0	0	0	0	0	0	0	8.97127e-06	0.000830985	0
ZOTU4677	0	0	0	0	0	0.000279317	1.17191e-05	0.000135789	0	2.80442e-05	0	0	0	0	0	0	0	0	0	0	0	0	0	0	0	0	0	0	0	0	0	0	9.23685e-05	0	0.000144342	8.97022e-05	6.21033e-05	0	0.000260586	0	0	6.8675e-05	0.000617064	0	0	0	0	0	0
ZOTU5441	0	0	0	0	0	0	0	0	7.1664e-05	0.000154243	0	0	0	0	0	0	0	0	0	0	0	0	0	0	0	0	0	0	0	0.000289045	0.000114791	0	0	0	0	0.000143524	0	5.10064e-05	0	0	0	2.28917e-05	0	0	0.000196451	2.26701e-05	0	0	0
ZOTU7886	0	0	0	0	0	0.000999662	9.37526e-05	0	0	0	0	0	0	0	0	0	0	0	0	0	0	0	0	0	0	0	0	0	0	0	0	0	0	6.55792e-05	0.000206203	5.38213e-05	0	0	0.000358306	0	0	0	0	0	0	0	0	0	0
ZOTU2133	0	0	0	0	0	0	2.34381e-05	0	0	0	0	0	0	0	0	0	0	0	7.60321e-05	0	0	0	0	0	0	0	0	0	0	0	0	0	0	0	0	0	0.00167679	0	0	0	0	0	0	0	0	0	0	0	0
ZOTU2656	0	0	0	0	0	0.00016171	0.000105472	0	0	0	0	0	0	0	0	0	0	0.000629793	0	0	0	0	0	0	0	0	0	0	0	0	0	0	0	0.000205482	0.000309304	0.000161464	0	0	0.000201954	0	0	0	0	0	0	0	0	0	0
ZOTU6145	0	0	0	0	0	0	1.17191e-05	0	0	0	0	0	0	0	0	0	0	0	0	0	0	0	0	0	0	0	0	0	0.000176585	1.92697e-05	0.000199637	0.000351476	0.000775896	0	0	1.79404e-05	0	2.04025e-05	0	0	0	0	0	0	8.18545e-06	0	0	0	0
ZOTU6805	0	0	0	0	0	0	1.17191e-05	4.28807e-05	0.000214992	0.000147232	0	0	0	0	0	0	0	0	0	3.44857e-05	0	0	0	0	0	0	0	0	1.47154e-05	0	0.000139746	0.000582446	0	4.37195e-06	0	1.79404e-05	9.93653e-05	8.16102e-05	0	0	0	0.000331929	0	1.47458e-05	3.27418e-05	0	0	0	0
ZOTU8496	6.05576e-05	0	0	0	0	8.82055e-05	0	0	0	0	0	0	0	0	0	0	0	0.00112992	6.33601e-05	0	0	0	0	0	0	0	0	0	0	0	0	0	0	0.000209853	2.06203e-05	0	0	0	0.00019544	0	0	0	0	0	0	0	0	0	0
ZOTU2665	0	0	0.000399257	0.00135526	0	0	0	0	0	0	0	0	0	0	0	0	0	0	0	0	0	0	0	0	0	0	0	0	0	0	0	0	0	0	0	0	0	0	0	0	0	1.14458e-05	0	0	0	0	0	0	0
ZOTU4401	0	0	0	0	0	0	3.51572e-05	0	0	0	0	0	0	0	0	0	0	0.00151891	0	0	0	0	0	0	0	0	0	0	0	0	0	0	0	0	0	3.58809e-05	0	0	0.000162866	0	0	1.14458e-05	0	0	0	0	0	0	0
ZOTU7394	0	0	0	0	0	0	0	0.00017867	7.1664e-05	0	0	0	0	0	0	0	0	0.000370466	8.87042e-05	0	0	0	0	0	0	0	0	0	2.94308e-05	0	0	0	5.54211e-05	0	4.12405e-05	0.000735558	0.000124207	0	0	0	0	6.8675e-05	0	0	0	0	0	0	0
ZOTU6131	0	0	0	0	0	0	0	0	0	0	0	0	0	0	0	0	0	0.00157448	7.60321e-05	0	0	0	9.73481e-05	1.61495e-05	0	0	0	0	0	0	0	0	0	0	0	0	0	0	0	0	0	0	0	0	0	0	0	0	0
ZOTU5572	0	0	0	0	0	1.47009e-05	0	0	0	0	0	0	0	0	0	0	0	0.00101878	0	0	0	0	0	8.07474e-06	0	0	0	0	0	0	0	0	0	3.06036e-05	0.000206203	0.000197345	0	0	0.000228013	0	5.88224e-05	0	0	0	0	0	0	0	0
ZOTU4036	0	0	0	0	0	0	2.34381e-05	0	0.000286656	0.00026642	0	0	0	0	0	0	0	0	0	0	0	0	0	0	0	0	0	0	8.82924e-05	0.000115618	1.49727e-05	0	0	0	0	0	0.000136627	5.10064e-05	0	0	0	0.000778317	0	0	0	0	0	0	0
ZOTU4544	0	0	0	0	0	0.000735045	0	0	0	0	0	0	0	0	0	0	0	0.000703886	0	0	0	0	0	0	0	0	0	0	0	0	0	0	0	6.99512e-05	0.000144342	5.38213e-05	0	0	5.21173e-05	0	0	0	0	0	0	0	0	0	0
ZOTU6519	0	0	0	0	0	0.000455728	0.000140629	2.85872e-05	0	0	0	0	0	0	0	0	0	0.000129663	0	0	0	0	0	0	0	0	0	0	0	0	0	0	0	0	0.000309304	0.000358809	6.21033e-05	0	0.000273616	0	0	0	0	0	0	0	0	0	0
ZOTU5538	0	0	0	0	0	0	9.37526e-05	0	7.1664e-05	4.90773e-05	0.000433338	0	0	0	0	0	0	0.000203757	5.06881e-05	0.000103457	0	0	0	0	0	0	0	0	0	7.70787e-05	9.98183e-06	0	0.000535737	0	0	0	0	6.12076e-05	0	0	0	6.8675e-05	0	0	0	0	0	0	0
ZOTU3368	0	0	0	0	0	0	0	0	0	0	0	0	0	0	0	0	0	0	0	0	0	0	0	0	0	0	0	0	0.00161869	9.63484e-05	1.49727e-05	2.00844e-05	0	0	0	0	0	0	0	0	0	0	0	0	8.18545e-06	0	0	0	0
ZOTU8697	0	0	0	0	0	0.000720345	0	0	0	0	0	0	0	0	0	0	0	0.00038899	0	0	0	0	0	0	0	0	0	0	0	0	0	0	0	0	6.18608e-05	7.17618e-05	0	0	0.000514658	0	0	0	0	0	0	0	0	0	0
ZOTU8188	0	0	0	0	0	0.000470429	4.68763e-05	6.43211e-05	0	0	0	0	0	0	0	0	0	0.00016671	0	0	0	0	0	0	0	0	0	0	0	0	0	0	0	0	0.000350544	0.000233226	0	0	0.000423453	0	0	0	0	0	0	0	0	0	0
ZOTU8631	0	0	0	0	0	0.000764447	0	0	0	0	0	0	0	0	0	0	0	0	0	0	0	0	0	0	0	0	0	0	0	0	1.49727e-05	0	0	0.000113671	0.00082481	3.58809e-05	0	0	0	0	0	0	0	0	0	0	0	0	0
ZOTU6416	0.000436015	0	0	0	0	0.000117607	1.17191e-05	0	0	0	0	0	0	0	0	0	0	0	0	0	0	0	0	0	0	0	0	0	0	1.92697e-05	0	0	0	4.37195e-06	0.000350544	0.000107643	0	5.10064e-05	6.51466e-05	0	0.000352934	0	0	0.000235933	0	0	0	0	0
ZOTU5073	0	0	0	0	0	0.000735045	0.000105472	0	0	0	0	0	0	0	0	0	0	0	6.33601e-05	0	0	0	0	0	0	0	0	0	0	0	0	0	0	1.74878e-05	0.000556747	0.000269107	0	0	0	0	0	0	0	0	0	0	0	0	0
ZOTU1314	0	0	0	0	0	0	0	0	0	0	0	0	0	0	0	0	0	0	0	0	0	0	0	0	0	0	0	0	0	0	0	0	0	0	0.000185582	3.58809e-05	0	0	0	0.00152361	0	0	0	0	0	0	0	0	0
ZOTU6170	0	0	0	0	0	0.000573335	0	0	0	0	0	0	0	0	0	0	0	0	0	0	0	0	0	0	0	0	0	0	0	0	0	0	0	0.000677652	0.000123722	1.79404e-05	0	0	0.000351792	0	0	0	0	0	0	0	0	0	0
ZOTU6513	0	0.00161986	0.000123907	0	0	0	0	0	0	0	0	0	0	0	0	0	0	0	0	0	0	0	0	0	0	0	0	0	0	0	0	0	0	0	0	0	0	0	0	0	0	0	0	0	0	0	0	0	0
ZOTU6690	0	0	0	0	0	0.000176411	0.00037501	0.000192963	0	0	0	0	0	0	0	0	0	0	0.00012672	0	0	0	0	0	0	0	0	0	0	0	0	0	0	1.74878e-05	6.18608e-05	0.000269107	4.96827e-05	4.08051e-05	6.51466e-05	0	0.000333327	3.43375e-05	0	0	0	0	0	0	0
ZOTU3908	0	0	0	0	0	0	0.000175786	0	0.000286656	0	0	0	0	0	0	0	0	0	0.000164736	0	0	0	0	0	0	0	0	0	0	0	0	0	0	0	0	3.58809e-05	0.000136627	0.000703888	7.16612e-05	0	0	0	0	0.000162204	0	0	0	0	0
ZOTU3436	0	0	0	0	0	0	0	0	0	0	0	0	0	0	0	0	0	0.00168562	2.5344e-05	0	0	0	0	0	0	0	0	0	0	0	0	0	0	0	0	0	0	0	2.60586e-05	0	0	0	0	0	0	0	0	0	0
ZOTU6508	0.00087203	7.71361e-06	0	0	0	0.00016171	0.000199224	4.28807e-05	0	0	0	0	0	0	0	0	0	5.557e-05	0	0	0	0	0	0	0	0	0	0	0	0	0	0	0	0	0	8.97022e-05	3.7262e-05	0	0	0.000270402	0	0	0	0	0	0	0	0	0
ZOTU4353	0	0	0	0	0	0.00119077	0.000164067	1.42936e-05	0	0	0	0	0	0	0	0	0	0	1.2672e-05	0	0	0	0	0	0	0	0	0	0	0	0	0	0	0	0.000123722	7.17618e-05	3.7262e-05	6.12076e-05	5.86319e-05	0	0	0	0	0	0	0	0	0	0
ZOTU5496	0.00015745	0	0	0	0	0	4.68763e-05	0	0	0	0	0	0	0	0	0	0	0.00138925	0.000101376	0	0	0	0	0	0	0	0	0	0	0	0	0	0	0	0	1.79404e-05	0	2.04025e-05	0	0	0	0	0	0	0	0	0	0	0
ZOTU8676	0	0	0	0	0	0.00105847	8.20335e-05	0	0	0	0	0	0	0	0	0	0	0	0	0	0	0	0	0	0	0	0	0	0	0	0	0	0	0.000288549	0.000268063	3.58809e-05	0	0	0	0	0	0	0	0	0	0	0	0	0
ZOTU4791	0	0	0	0	0	0.000294018	0.000164067	0.000121495	0	0	0	0	0	0	0	0	0	0	0	0	0	0	0	0	0	0	0	0	0	0	0	0	0	0	0.000226823	0.000179404	0	0	2.60586e-05	0	0.000686261	3.43375e-05	0	0	0	0	0	0	0
ZOTU7214	8.47807e-05	0	0	0	0	0.000764447	4.68763e-05	7.14679e-06	0	0	0	0	0	0	0	0	0	0.00027785	0	0	0	0	0	0	0	0	0	0	0	0	0	0	0	9.61829e-05	0.000144342	0.000107643	0	0	0.000201954	0	0	0	0	0	0	0	0	0	0
ZOTU4459	0	0	0	0	0	0	0.000714863	0.000271578	0.000143328	4.20663e-05	0	0	0	0	0	0	0	0	0	0	0	0	0	0	0	0	0	0	0	0	3.99273e-05	0	0	0	0	0	0.000124207	6.12076e-05	0	0	7.84298e-05	0	0.000246826	0	8.18545e-06	0	0	0	0
ZOTU5733	0	0	0	0	0	0	0	0.000364486	0	0	0	0	0	0	0	0	0	0	0	0	0	0	0	0	0	0	0	0	0	0	0	0	0	0	0.000474266	0.000233226	0.000658295	0	0	0	0	0	0	0	0	0	0	0	0
ZOTU5796	0.000169561	0	0	0	0	0.000132308	0.000187505	0	0	0	0	0	0	0	0	0	0	0	6.33601e-05	0	0	0	0	0	0	0	0	0	0	0	0	0	0	8.7439e-05	0.000907291	0.000161464	0	2.04025e-05	0	0	0	0	0	0	0	0	0	0	0
ZOTU6250	0	0	0	0	0	0.000220514	0.000363291	0.000157229	0	0	0	0	0	0	0	0	0	0	0	0	0	0	0	0	0	0	0	0	0	0	0	0	0	6.12073e-05	0.000288684	0.000107643	0.000173889	0	0	0	0.000352934	0	0	0	0	0	0	0	0
ZOTU5301	0.000290677	0	0	0	0	0.00064684	0.000410167	0	0	0	0	0	0	0	0	0	0	0.000240803	0	0	0	0	0	0	0	0	0	0	0	0	0	0	0	0	8.2481e-05	5.38213e-05	0	0	0	0	0	0	0	0	0	0	0	0	0
ZOTU3685	0	0	0	0	0	0	0	0	0	0	4.81487e-05	0	0	0	0	0	0	0	0	0	0	0	0	4.84484e-05	5.5919e-05	1.24278e-05	0	0	0	0	0	0	0	0	0	0	0	0	0	0	0	0	1.37125e-05	0	0	0	0	0	0
ZOTU6487	0.000520795	0	0	0	0	0.00016171	2.34381e-05	0	0	0	0	0	0	0	0	0	0	0.00011114	0	0	0	0	0	0	0	0	0	0	0	0	0	0	0	9.61829e-05	4.12405e-05	3.58809e-05	0	0	0.000729642	0	0	0	0	0	0	0	0	0	0
ZOTU5259	4.84461e-05	0	0	0	0	2.94018e-05	0.000410167	3.57339e-05	0	2.10331e-05	0	0	0	0	0	0	0	0	0	0	0	0	0	0	0	0	0	0	0	0	1.99637e-05	0	0	0	0	0	0	6.12076e-05	0	0	0	0	0.000754189	0.000339153	0	0	0	0	0
ZOTU2153	0	0	0	0	0	0	0	0	0	0	0	0	0	0	0	0	0	0	0	0	0	0	0	0	0	0	0	0	0.000235446	9.63484e-05	0	0.00138582	0	0	0	0	0	0	0	0	0	0	0	0	0	0	0	0	0
ZOTU6572	0	0	0	0	0	0.000294018	0.000105472	5.00275e-05	0	0	0	0	0	0	0	0	0	0	1.2672e-05	0	0	0	0	0	0	0	0	0	0	0	0	0	0	0.000192366	0.000329924	3.58809e-05	0	0	0.000592834	0	0	0	0	0.00010322	0	0	0	0	0
ZOTU4750	0	0	0	0	0	7.35045e-05	0.00037501	2.14404e-05	0	0.000189298	0	0	0	0	0	0	0	0	0	0	0	0	0	0	0	0	0	0	0	0	0	0	0	8.7439e-06	4.12405e-05	5.38213e-05	0.000683136	0.000112214	3.90879e-05	0	5.88224e-05	5.72292e-05	0	0	0	0	0	0	0
ZOTU6158	0.000339123	0	0	0	0	0	0	0	0	0	0.000240743	0	0	0	0	0	0	0.0011114	1.2672e-05	0	0	0	8.11234e-06	0	0	0	0	0	0	0	0	0	0	0	0	0	0	0	0	0	0	0	0	0	0	0	0	0	0
ZOTU3916	0.000327011	0	0	0	0	0.000147009	1.17191e-05	0	0.000214992	0	0	0	0	0	0	0	0	0.000629793	2.5344e-05	0	0	0	0	0	0	0	0	0	0	0	0	0	0	0	0.000123722	5.38213e-05	2.48413e-05	0.000153019	0	0	0	0	0	0	0	0	0	0	0
ZOTU8961	0.000629799	0	0	0	0	0.000426326	0	0.000114349	0	0	0	0	0	0	0	0	0	0	0	0	0	0	0	0	0	0	0	0	0	0	0	0	0	0	8.2481e-05	0.000179404	4.96827e-05	0	0.000228013	0	0	0	0	0	0	0	0	0	0
ZOTU2143	0	0	0	0	0	0.000117607	0.000339853	0	0	7.01105e-06	0	0	0	0	0	0	0	0	0.000304129	0	0	0	0	0	0	0	0	0	0	0	0	0	0	3.93475e-05	0.000103101	8.97022e-05	0	3.06038e-05	0.000501629	0	0.000176467	0	0	0	0	0	0	0	0
ZOTU2080	0	0	0	0	0	0	0	0	0	3.50552e-05	0	0	0	0	0	0	0	0	0	0	0	0	0	0	0	0	0	0	0	0	0	0	0	0	0	0	0	0.00167301	0	0	0	0	0	0	0	0	0	0	0
ZOTU2419	0	0	0	0	0	0	0	0.000514569	0.000143328	0	0	0	0	0	0	0	0	0	0	0	0	0	0	0	0	0	0	0	0	1.92697e-05	0	0	0	0	0	0.000125583	0.000211151	0.000295837	0	0	0	0	0	0.000398136	0	0	0	0	0
ZOTU8291	0	0	0	0	0	7.35045e-05	2.34381e-05	2.85872e-05	0	0	0	0	0	0	0	0	0	0	0	0	0	0	0	0	0	0	0	0	0	0	0	0	0	6.99512e-05	0.00107225	0.000287047	3.7262e-05	8.16102e-05	3.25733e-05	0	0	0	0	0	0	0	0	0	0
ZOTU2068	0	0	0	0	0	0	0	0	0	2.10331e-05	0	0	0	0	0	0	0	0	0	0	0	0	0	0	0	0	0	0	0	0	0	0	0	0	0	0	0	0	0	0	0	0	0	0	0	0.0017456	0	0	0
ZOTU6746	0	0	0	0	0	0	0.000105472	0.000307312	0	0.000140221	0	0	0	0	0	0	0	0	0	0	0	0	0	0	0	0	0	0	0.000103008	0.000462472	5.49001e-05	0	3.69474e-05	0	0	3.58809e-05	9.93653e-05	0.000102013	6.51466e-06	0	1.96075e-05	0	0	0.000221187	8.18545e-06	0	0	0	0
ZOTU2223	0	0	0	0	0	0	0	0	0	0	0	0	0	0	0	0	0	0	0	0	0	0	0	0	0	0	0	0	0	0	0	0	0	0	0	0	0	0	0	0	0	0	0	0	0	0	0.000331937	0.000843028	0
ZOTU3167	0	0	0	0	0	0	0	0	0	0	0	0	0	0	0	0	0	0	0	0	0	0	0	0	0	0	0	0	0	0.00167646	2.49546e-05	0	0	0	0	0	0	0	0	0	0	0	0	0	0	0	0	0	0
ZOTU1201	0	0	0	0	0	4.41027e-05	0	0	0	0	0	0	0	0	0	0	0	0	0	0	0	0	0	0	0	0	0	0	0	0	0	0	0	0.00161762	0	0	0	0	3.90879e-05	0	0	0	0	0	0	0	0	0	0
ZOTU5574	0.000133227	0	0	0	0	0.000102906	3.51572e-05	7.14679e-06	0	0	0	0	0	0	0	0	0	0.00122254	0	0	0	0	0	0	0	0	0	0	0	0	0	0	0	3.93475e-05	8.2481e-05	5.38213e-05	0	0	1.9544e-05	0	0	0	0	0	0	0	0	0	0
ZOTU3394	0	0	0	0	0	0.00132308	2.34381e-05	0	0	0	0	0	0	0	0	0	0	0	0	0	0	0	0	0	0	0	0	0	0	0	0	0	0	0.000236085	4.12405e-05	0	0	0	7.16612e-05	0	0	0	0	0	0	0	0	0	0
ZOTU5462	0	0	0	0	0	0.000147009	4.68763e-05	0	0	0	0	0	0	0	0	0	0	0	0	0	0	0	0	0	0	0	0	0	0	0	0	0	0	5.24634e-05	0.000288684	0.000179404	6.21033e-05	0	0	0	0	0	0.00091874	0	0	0	0	0	0
ZOTU2403	0.0012596	0.000138845	0	0	0	0	3.51572e-05	0	0	0	0	0	0	0	0	0	0	0	0	0	0	0	0	2.42242e-05	0	0	0	0	0	0	0	0	0	0	0.000164962	7.17618e-05	0	0	0	0	0	0	0	0	0	0	0	0	0
ZOTU1805	0	0	0	0	0	0	0	0.000285872	0	4.20663e-05	0	0	0	0	0	0	0	0	0	0	0	0	0	0	0	0	0	0	0.000132439	5.7809e-05	3.49364e-05	1.00422e-05	0	0	0	3.58809e-05	0.000869446	0.000224428	0	0	0	0	0	0	0	0	0	0	0
ZOTU3858	0.000496572	0	0	0	0	0.00048513	4.68763e-05	5.00275e-05	0	7.01105e-06	0	0	0	0	0	0	0	0.000407513	1.2672e-05	0	0	0	0	0	0	0	0	0	0	0	0	0	0	0	0.000164962	1.79404e-05	0	0	0	0	0	0	0	0	0	0	0	0	0
ZOTU5556	0	0	0	0	0	0.000793849	0.000222662	0	0	0	0	0	0	0	0	0	0	0	0	0	0	0	0	0	0	0	0	0	0	0	0	0	0	5.24634e-05	0.000350544	0.000269107	0	0	0	0	0	0	0	0	0	0	0	0	0
ZOTU6395	0	0	0	0	0	0.000382224	8.20335e-05	7.14679e-06	0	0	0	0	0	0	0	0	0	0	3.80161e-05	0	0	0	0	0	0	0	0	0	0	0	0	0	0	6.99512e-05	0.000371165	0.000197345	0	0	0.000540717	0	0	0	0	0	0	0	0	0	0
ZOTU8560	0.000375457	0	0	0	0	0	0.000339853	0.000107202	7.1664e-05	0	0	0	0	0	0	0	0	0	0.000152064	0	0	0	0	0	0	0	0	0	0	0	0	0	0	0	0.000103101	1.79404e-05	0.000161469	0	8.46906e-05	0	0.000274504	0	0	0	0	0	0	0	0
ZOTU4820	0	0	0	0	0	0.000249915	2.34381e-05	7.14679e-06	0	0	0	0	0	0	0	0	0	0	0	0	0	0	0	0	0	0	0	0	0	0	0	0	0	0.000236085	0.000164962	8.97022e-05	9.93653e-05	0	0.000814332	0	0	0	0	0	0	0	0	0	0
ZOTU8401	0	0	0	0	0	0.000338121	1.17191e-05	0	0	0	0	0	0	0	0	0	0	0	0	0	0	0	0	0	0	0	0	0	0	0	0	0	0	0	0.000309304	8.97022e-05	0	0.000112214	0	0	0.000823513	0	0	0	0	0	0	0	0
ZOTU2305	0	0	0	0	0	0.000837952	2.34381e-05	0	0	0	0	0	0	0	0	0	0	0	0	0	0	0	0	0	0	0	0	0	0	0	0	0	0	0	0.000164962	0	1.24207e-05	0	0.000644951	0	0	0	0	0	0	0	0	0	0
ZOTU4444	0	0	0	0	0	0.000837952	3.51572e-05	0	0	0	0	0	0	0	0	0	0	0.000203757	0	0	0	0	0	0	0	0	0	0	0	0	0	0	0	0.000131158	0.000268063	1.79404e-05	0	0	0.000188925	0	0	0	0	0	0	0	0	0	0
ZOTU7796	0	0	0	0	0	0.00016171	0.000140629	7.14679e-06	0.000143328	0	0.000650007	0	0	0	0	0	0	0.000185233	2.5344e-05	8.62143e-05	0	0	0	0	0	0	0	0	0	0	0	0	0.000203211	0	0	0	0	0	0	0	0	8.01209e-05	0	0	0	0	0	0	0
ZOTU9685	0.000230119	0	0	0	0	2.94018e-05	0.000210943	2.14404e-05	0	0	0	0	0	0	0	0	0	0.000796503	1.2672e-05	0	0	0	1.62247e-05	0	0	0	0	0	0	0	0	0	0	0	0	0.000215285	3.7262e-05	5.10064e-05	5.86319e-05	0	0	0	0	0	0	0	0	0	0
ZOTU2542	0	0	0	0	0	0	0	0	0	0	0	0	0	0	0	0	0	0	0	0	0	0	8.11234e-06	7.26727e-05	0.000156573	0.00144162	0	0	0	0	0	0	0	0	0	0	0	0	0	0	0	0	0	0	0	0	0	0	0
ZOTU3747	0	0	0	0	0	0	0	0	0	1.40221e-05	0	0	0	0	0	0	0	0	0	0	0	0	0	0	0	0	0	0	0	0.000481742	0	0	1.84737e-05	0	0	0	0	1.02013e-05	0	0	0	0	0	0	1.63709e-05	0	0	0	0
ZOTU3929	0	0	0	0	0	0.000264616	2.34381e-05	5.71743e-05	0	0	0	0	0	0	0	0	0	0.00116697	0	0	0	0	0	0	0	0	0	0	0	0	0	0	0	0	4.12405e-05	7.17618e-05	4.96827e-05	0	0	0	0	0	0	0	0	0	0	0	0
ZOTU2617	0	0	0	0	0	0	0	0	0.000143328	0.000175276	0	0	0	0	0	0	0	0	0	0	0	0	0	0	0	0	0	0	0	0.00057809	0	0	0	0	0	1.79404e-05	7.4524e-05	0.000142818	0	0	0	1.14458e-05	0	0.000530848	0	0	0	0	0
ZOTU7038	0	0	0	0	0	0.000911456	2.34381e-05	0	0	0	0	0	0	0	0	0	0	0	0	0	0	0	0	0	0	0	0	0	0	0	0	0	0	0.000109299	0.000536127	5.38213e-05	3.7262e-05	0	0	0	0	0	0	0	0	0	0	0	0
ZOTU5752	0	0	0	0	0	4.41027e-05	0.000187505	0.00037878	0.000286656	2.80442e-05	0	0	0	0	0	0	0	0	7.60321e-05	0	0	0	0	0	0	0	0	0	0	1.92697e-05	0	0	0	0	0.000185582	0.000161464	9.93653e-05	2.04025e-05	0	0	0.00015686	0	0	0	0	0	0	0	0
ZOTU7822	0	0	0	0	0	1.47009e-05	1.17191e-05	0	7.1664e-05	0.000168265	0	0	0	0	0	0	0	0	0.000215424	0	0	0	0	0	0	0	0	0	1.47154e-05	0	2.99455e-05	0	0	0	0.000226823	0.000269107	0	0.000601875	0	0	0	4.57834e-05	0	0	0	0	0	0	0
ZOTU5050	0	0.000246835	0	0	0	0	3.51572e-05	2.85872e-05	7.1664e-05	0.00013321	0	0	0	0	0	0	0	0	2.5344e-05	0	0	0	8.11234e-06	0	0	0	0	0	8.82924e-05	3.85394e-05	9.48274e-05	0	0	0	0	8.97022e-05	0.000124207	0.000295837	0	0	0	3.43375e-05	0	0	0.000351974	0	0	0	0
ZOTU6168	0	0	0	0	0	0	0	0	0	2.80442e-05	0	0	0	0	0	0	0	0	0	0	0	0	0	0	0	0	0	0	0.00054447	1.92697e-05	0.000239564	8.03374e-05	0	0	2.06203e-05	8.97022e-05	0.000335358	6.12076e-05	0	0	1.96075e-05	0	0.0001097	0.000117966	0	0	0	0	0
ZOTU7162	0	0.00165843	0	0	0	0	0	0	0	7.01105e-06	0	0	0	0	0	0	0	0	0	0	0	0	0	0	0	0	0	0	0	0	0	0	0	0	0	0	0	0	0	0	0	0	0	0	0	0	0	0	0
ZOTU8461	0.000423903	0	0	0	0	0	0	0	0	9.81547e-05	0	0	0	0	0	0	0	0	2.5344e-05	0.00106906	0	0	0	0	0	0	0	0	0	0	0	0	0	0	0	3.58809e-05	0	0	0	0	0	1.14458e-05	0	0	0	0	0	0	0
ZOTU6140	0	0	0	0	0	0	0	0	0	0	0	0	0	0	0	0	0	0.00163005	2.5344e-05	0	0	0	8.11234e-06	0	0	0	0	0	0	0	0	0	0	0	0	0	0	0	0	0	0	0	0	0	0	0	0	0	0
ZOTU4646	0	0	0	0	0	0	0	0	7.1664e-05	2.80442e-05	0	0	0	0	0	0	0	0	0	0	0	0	0	0	0	0	0	0	0.000397316	0.000115618	0.000134755	0.000160675	0	0	0	0	0	6.12076e-05	0	0	0	0	0	0	3.27418e-05	0	0	0	0
ZOTU1683	0.000254342	0.00121875	0.000178977	0	0	0	0	0	0	0	0	0	0	0	0	0	0	0	0	0	0	0	8.11234e-06	0	0	0	0	0	0	0	0	0	0	0	0	0	0	0	0	0	0	0	0	0	0	0	0	0	0
ZOTU2831	0	0	0	0	0	0	0	0	0	0	0	0	0	0	0	0	0	0.000685363	0.000696961	0.000275886	0	0	0	0	0	0	0	0	0	0	0	0	0	0	0	0	0	0	0	0	0	0	0	0	0	0	0	0	0
ZOTU5501	0	0	0	0	0	0.000470429	0.00037501	2.14404e-05	0	0	0	0	0	0	0	0	0	0	0	0	0	0	0	0	0	0	0	0	0	0	0	0	0	8.7439e-06	0.000433025	0.000287047	6.21033e-05	0	0	0	0	0	0	0	0	0	0	0	0
ZOTU1627	0	0	0	0	0	0	0	0	0	0	0	0	0	0	0	0	0	0	0	0	0	0	0	0	0	0	0	0	0	0	0	0	0	0.000861274	0.00076295	0	0	0	3.25733e-05	0	0	0	0	0	0	0	0	0	0
ZOTU5024	0	0	0	0	0	0.00080855	0	0	0	0	0	0	0	0	0	0	0	0	0	0	0	0	0	0	0	0	0	0	0	0	0	0	0	0.00020111	0.000144342	0	0	0	0.000501629	0	0	0	0	0	0	0	0	0	0
ZOTU4309	0	0	0	0	0	0.000661541	0.000140629	0	0	0	0	0	0	0	0	0	0	0	0	0	0	0	0	0	0	0	0	0	0	0	0	0	0	0.000126786	0	0	0	0	7.81759e-05	0	0.000647046	0	0	0	0	0	0	0	0
ZOTU4561	0	0	0	0	0	0	0	0.000371633	7.1664e-05	7.71215e-05	0	0	0	0	0	0	0	0	0	0	0	0	0	0	0	0	0	0	0.000103008	0	0.000703719	8.03374e-05	0	0	0	5.38213e-05	9.93653e-05	9.18114e-05	0	0	0	0	0	0	0	0	0	0	0
ZOTU6065	0	0	0	0	0	0	0	0	0	0	0	0	0	0	0	0	0	0	0	0	0	0	0	8.07474e-06	0.000111838	0.000173989	0.000209202	0.00114769	0	0	0	0	0	0	0	0	0	0	0	0	0	0	0	0	0	0	0	0	0
ZOTU8414	0	0	0	0	0	2.94018e-05	0.000105472	1.42936e-05	7.1664e-05	4.90773e-05	0	0	0	0	0	0	0	0	0.000215424	0	0	0	0	0	0	0	0	0	0	0	0	0	0	4.37195e-06	0.000701089	0.00039469	6.21033e-05	0	0	0	0	0	0	0	0	0	0	0	0
ZOTU4226	0	0	0	0	0	0	0	0	0	1.40221e-05	0	0	0	0	0	0	0	0	0	0	4.94274e-06	0	0	0	0	0	0	0	0	0	9.98183e-05	0	1.84737e-05	0	0	0	1.24207e-05	0	0	0	0	0	0	0	7.3669e-05	0	0.000376793	0	0
ZOTU5780	0.000254342	0	0	0	0	0.000205813	0.000164067	6.43211e-05	0	0	0	0	0	0	0	0	0	0	7.60321e-05	0	0	0	0	0	0	0	0	0	0	0	0	0	0	2.62317e-05	0.000639228	0.000215285	0	0	0	0	0	0	0	0	0	0	0	0	0
ZOTU8122	0.000666134	0	0	0	0	2.94018e-05	0.000117191	9.29082e-05	0	0	0	0	0	0	0	0	0	7.40933e-05	3.80161e-05	0	0	0	1.62247e-05	0	0	0	0	0	1.47154e-05	0	0	0	0	0	0	0.000125583	1.24207e-05	0	6.51466e-06	0	0.000450972	0	0	0	0	0	0	0	0
ZOTU6842	0.000109004	0	0	0	0	0	0	0	0	0	0	0	0	0	0	0	0	0.00148187	1.2672e-05	0	0	0	4.05617e-05	0	0	0	0	0	0	0	0	0	0	0	0	0	0	0	0	0	0	0	0	0	0	0	0	0	0
ZOTU6638	0	0	0	0	0	0	0	0	0	0.000273431	0	0	0	0	0	0	0	0	0	0	0	0	0	0	0	0	0	0	0	0.000134888	0	8.03374e-05	0	0	0	5.38213e-05	0	1.02013e-05	0	0	0	0.000183133	0	8.84747e-05	5.72981e-05	0	0	0	0
ZOTU8439	0	0	0	0	0	0	1.17191e-05	7.86147e-05	0.000214992	0.000154243	0	0	0	0	0	0	0	0	0	0.000103457	0	0	0	0	0	0	0	0	0	0	1.49727e-05	0	0	0	0	0	0.000434723	4.08051e-05	5.21173e-05	0	0	4.57834e-05	0	2.94916e-05	1.63709e-05	0	0.000394736	0	0
ZOTU2853	0	0	0	0	0	7.35045e-05	0	0	0	0	0	0	0	0	0	1.43497e-05	0	0	0	0	0	0	0	0	0	0	0	0	0	0	0	0	0	0.000878762	0.000309304	8.97022e-05	0	0	0.000273616	0	0	0	0	0	0	0	0	0	0
ZOTU4471	0	0	0	0	0	0.000147009	0.000175786	0.000192963	0	0	0	0	0	0	0	0	0	0	0.000329473	0	0	0	0	0	0	0	0	0	0	0	0	0	0	9.18109e-05	0.000309304	0.000304987	8.69446e-05	0	0	0	0	0	0	0	0	0	0	0	0
ZOTU1997	0	0	0	0	0	0	0	0	0	0	0	0	0	0	0	0	0	0	0	0	0	0	0	0	0	0	0	0	0	0	0	0	5.54211e-05	0	0	0	0	0	0	0	0	0	0	0	0.00154705	3.40051e-05	0	0	0
ZOTU1257	0	0	0	0	0	0	0	0	0	0	0	0	0	0	0	0	0	0	0	0	0	0	0	0	0	0	0	0	0	0	0	0	0	0.00161762	0	1.79404e-05	0	0	0	0	0	0	0	0	0	0	0	0	0
ZOTU1977	0	0	0	0	0	0.000749746	0	0	0	0	0	0	0	0	0	0	0	0	0	0	0	0	0	0	0	0	0	0	0	0	0	0	0	0.000450311	0.000350544	0	0	0	8.46906e-05	0	0	0	0	0	0	0	0	0	0
ZOTU3070	0	0	0	0	0	0	1.17191e-05	5.71743e-05	0.000143328	0.000105166	0	0	0	0	0	0	0	0	0	0	0	0	0	0	0	0	0	0	0	0	0	0.000401687	0	0	0	0.000251166	0.00037262	0.000112214	0	0	0	0	0.000178263	0	0	0	0	0	0
ZOTU4683	0	0	0	0	0	0	0	0	0	7.01105e-06	0	0	0	0	0	0	0	0	0	0	0	0	0	0	0	0	0	0	0.000161869	0.000134888	0.000119782	5.02109e-05	0	0	0	0	0	0	0	0	0	0	0	0	0.000212822	0.000816123	0	0	0
ZOTU6652	0	0	0	0	0	0.00032342	0.000199224	0	7.1664e-05	3.50552e-05	0	0	0	0	0	0	0	0	0	0	0	0	0	0	0	0	0	0	0.000132439	0	0	0	0	9.18109e-05	0.000453646	0.000322928	0	0	0	0	0	0	0	0	0	0	0	0	0
ZOTU4917	0	0	0	0	0	0.000779148	0.000222662	0	0	0	0	0	0	0	0	0	0	0	0	0	0	0	0	0	0	0	0	0	0	0	0	0	0	0.000419707	4.12405e-05	8.97022e-05	3.7262e-05	0	3.90879e-05	0	0	0	0	0	0	0	0	0	0
ZOTU5157	0	0	0	0	0	0.000308719	0.000621111	0.000278725	0	7.01105e-06	0	0	0	0	0	0	0	0	2.5344e-05	0	0	0	0	0	0	0	0	0	0	0	0	0	0	4.37195e-06	0.000164962	0.000197345	0	0	1.9544e-05	0	0	0	0	0	0	0	0	0	0
ZOTU7738	0	0	0	0	0	0.000470429	0.00025782	0	0	4.90773e-05	0	0	0	0	0	0	0	0	0.000139392	0	0	0	0	0	0	0	0	0	0	0	0	0	0	6.12073e-05	0.000329924	8.97022e-05	0.000136627	9.18114e-05	0	0	0	0	0	0	0	0	0	0	0
ZOTU7793	0	0	0	0	0	0	0	2.85872e-05	7.1664e-05	0.000154243	0	0	0	0	0	0	0	0	0	0	0	0	0	0	0	0	0	0	1.47154e-05	0	0	0	0	0	2.06203e-05	8.97022e-05	0.000248413	0.000265233	0	7.80007e-05	0.000607831	1.14458e-05	0	0	0	0	0	0	0
ZOTU3606	0	0	0	0	0	0.00107317	0	0	0	0	0	0	0	0	0	0	0	0	0	0	0	0	0	0	0	0	0	0	0	0	0	0	0	0.000266689	0.000226823	5.38213e-05	0	0	0	0	0	0	0	0	0	0	0	0	0
ZOTU8805	0	0	0	0	0	0.000382224	3.51572e-05	0	0	0	0	0	0	0	0	0	0	0	0	0	0	0	0	0	0	0	0	0	0	0	0	0	0	9.61829e-05	0.000144342	0.000322928	0.000285675	0	0.000214984	0	0.000137252	0	0	0	0	0	0	0	0
ZOTU5900	0	0	0	0	0	0	0	0	0.000214992	0.000154243	0	0	0	0	0	0	0	0	0	0	0	0	0	0	0	0	0	0	0.000132439	0.000173427	0	0	0	0	0	0.000269107	0	0.000673284	0	0	0	0	0	0	0	0	0	0	0
ZOTU4208	8.47807e-05	0	0	0	0	0	0	0	0	0	0	0	0	0	0	0	0	0.00151891	1.2672e-05	0	0	0	0	0	0	0	0	0	0	0	0	0	0	0	0	0	0	0	0	0	0	0	0	0	0	0	0	0	0
ZOTU6289	0	0	0	0	0	0	0	3.57339e-05	0	4.90773e-05	0	0	0	0	0	0	0	0	0	0	0	0	0	0	0	0	0	0	0.000529755	0.000289045	0.000299455	0	0	0	8.2481e-05	0.000161464	6.21033e-05	5.10064e-05	0	0	0	1.14458e-05	0	0	0	0	0	0	0
ZOTU6084	0.000205896	0	0	0	0	0.000102906	0.000292977	6.43211e-05	0	0	0	0	0	0	0	0	0	0	0.000316801	0	0	0	0	0	0	0	0	0	0	0	0	0	0	0	0.000164962	0.000107643	0.000223572	0.000122415	0	0	0	1.14458e-05	0	0	0	0	0	0	0
ZOTU4425	0	0	0	0	0	0.000176411	4.68763e-05	0	0	0	0	0	0	0	0	0	0	0.00138925	0	0	0	0	0	0	0	0	0	0	0	0	0	0	0	0	0	0	0	0	0	0	0	0	0	0	0	0	0	0	0
ZOTU9600	0	0	0.00143182	0.000180701	0	0	0	0	0	0	0	0	0	0	0	0	0	0	0	0	0	0	0	0	0	0	0	0	0	0	0	0	0	0	0	0	0	0	0	0	0	0	0	0	0	0	0	0	0
ZOTU9592	0	7.71361e-06	0	0	0	8.82055e-05	0	0	0	0	0	0	0	0	0	0	0	0	1.2672e-05	0	0	0	0	0	0	0	0	0	0	0	0	0	0	0.0003585	0	1.79404e-05	0	1.02013e-05	0.00111401	0	0	0	0	0	0	0	0	0	0
ZOTU5488	1.21115e-05	1.54272e-05	0.00101879	0.000108421	0	0	0	0	0	0	0	0	0	0	0	0	0	0	0	0	0	0	0.000421842	3.2299e-05	0	0	0	0	0	0	0	0	0	0	0	0	0	0	0	0	0	0	0	0	0	0	0	0	0
ZOTU2973	0	0	0	0	0	0	0	5.00275e-05	7.1664e-05	0	0	0	0	0	0	0	0	0	0	0.00143116	0	0	0	0	0	0	0	0	0	0	0	0	0	0	0	5.38213e-05	0	0	0	0	0	0	0	0	0	0	0	0	0
ZOTU5497	0.000605576	0	0	0	0	0	0	0	0	0	0	0	0	0	0	0	0	0.00100026	0	0	0	0	0	0	0	0	0	0	0	0	0	0	0	0	0	0	0	0	0	0	0	0	0	0	0	0	0	0	0
ZOTU3255	0	0	0	0	0	0	0	0	0	0	0	0	0	0	0	0	0	0	0	0	0	0	0	0	0	0	0	0	0.000515039	0.000924945	6.48819e-05	0.000100422	0	0	0	0	0	0	0	0	0	0	0	0	0	0	0	0	0
ZOTU5874	0.000181673	0	0	0	0	0	0.000222662	0	0	0	0	0	0	0	0	0	0	0.00011114	0.00012672	0	0	0	0	0	0	0	0	0	0	0	0	0	0	0	0	1.79404e-05	2.48413e-05	0	0	0	0	0	0.00091874	0	0	0	0	0	0
ZOTU9624	0	0	0	0	0	0.000573335	0	0	0	0	0	0	0	0	0	0	0	0.0005557	0	0	0	0	0	0	0	0	0	0	0	0	0	0	0	0.000153018	0.000144342	7.17618e-05	0	0	0.000104235	0	0	0	0	0	0	0	0	0	0
ZOTU2386	0.00109004	0.000447389	0	0	0	0	0	0	0	0	0	0	0	0	0	0	0	0	6.33601e-05	0	0	0	0	0	0	0	0	0	0	0	0	0	0	0	0	0	0	0	0	0	0	0	0	0	0	0	0	0	0
ZOTU6275	0	0	0	0	0	0.000338121	4.68763e-05	0	0	0	0	0	0	0	0	0	0	0	0.000114048	0	0	0	0	0	0	0	0	0	0	0	0	0	0	0.000113671	0.00082481	0.000161464	0	0	0	0	0	0	0	0	0	0	0	0	0
ZOTU3369	0	0	0	0	0	0.00097026	9.37526e-05	0	0	0	0	0	0	0	0	0	0	0	0	0	0	0	0	0	0	0	0	0	0	0	0	0	0	2.18597e-05	0.000391785	0.000107643	1.24207e-05	0	0	0	0	0	0	0	0	0	0	0	0
ZOTU6298	0	0	0	0	0	8.82055e-05	1.17191e-05	6.43211e-05	0	3.50552e-05	0	0	0	0	0	0	0	0	0	0	0	0	0	0	0	0	0	0	0	0	0.000199637	0.000592488	0	4.37195e-06	0	0	9.93653e-05	0.000295837	0	0	0	0.000206025	0	0	0	0	0	0	0
ZOTU1943	0	0	0	0	0	0.00110257	0	0	0	0	0	0	0	0	0	0	0	0	0	0	0	0	0	0	0	0	0	0	0	0	0	0	0	0.00049403	0	0	0	0	0	0	0	0	0	0	0	0	0	0	0
ZOTU5910	0	0	0	0	0	0	0	0	0	0	0	0	0	0	0	0	0	0	0	0	0	0	0	0	0	0	0	0	0	0.00156084	2.49546e-05	0	0	0	0	0	0	1.02013e-05	0	0	0	0	0	0	0	0	0	0	0
ZOTU1962	0	0	0	0	0	0.000573335	0	0	0	0	0	0	0	0	0	0	0	0	0	0	0	0	0	0	0	0	0	0	0	0	0	0	0	0.000835042	6.18608e-05	0.000125583	0	0	0	0	0	0	0	0	0	0	0	0	0
ZOTU5990	0	0	0	0	0	2.94018e-05	5.85954e-05	4.28807e-05	7.1664e-05	0.000245387	0	0	0	0	0	0	0	0	0	0	0	0	0	0	0	0	0	0	2.94308e-05	0	4.99092e-06	1.00422e-05	1.84737e-05	0	0	0.000125583	0.000173889	9.18114e-05	0	0	0.000686261	0.00013735	0	0.000162204	0	0	0	0	0
ZOTU2359	0	0	0	0	0	0	0	7.14679e-06	0	0	0	0	0	0	0	0	0	0	8.87042e-05	0	0	0	0	0	0	0	0	0	0	0	0	0	0	0	0	1.79404e-05	0	0	0	0	0	0	0.00148095	0	0	0	0	0	0
ZOTU2763	0	0	0	0	0	0	2.34381e-05	0	0	6.30994e-05	0	0	0	0	0	0	0	0	0	0	0	0	0	0	0	0	0	0	0.00103008	0.000289045	0	0	0	0	0	0	0.000124207	1.02013e-05	7.81759e-05	0	0	6.8675e-05	0	0	1.63709e-05	0	0	0	0
ZOTU1702	0.000181673	0.00141159	0	0	0	0	0	0	0	0	0	0	0	0	0	0	0	0	0	0	0	0	0	0	0	0	0	0	0	0	0	0	0	0	0	0	0	0	0	0	0	0	0	0	0	0	0	0	0
ZOTU8840	7.26691e-05	0	0	0	0	0.000455728	3.51572e-05	0	0	0	0	0	0	0	0	0	0	0.000740933	3.80161e-05	0	0	0	0	0	0	0	0	0	0	0	0	0	0	3.93475e-05	4.12405e-05	0	0	0	0.000169381	0	0	0	0	0	0	0	0	0	0
ZOTU7468	4.84461e-05	0.00154272	0	0	0	0	0	0	0	0	0	0	0	0	0	0	0	0	0	0	0	0	0	0	0	0	0	0	0	0	0	0	0	0	0	0	0	0	0	0	0	0	0	0	0	0	0	0	0
ZOTU1794	0	0	0	0	0	0	0	0	0	0	0	0	0	0	0	0	0	0	0	0	0	0	8.11234e-06	0.00124351	0.000313147	2.48555e-05	0	0	0	0	0	0	0	0	0	0	0	0	0	0	0	0	0	0	0	0	0	0	0
ZOTU7325	0	0	0	0	0	0.000984961	0	0	0	0	0	0	0	0	0	0	0	0	0	0	0	0	0	0	0	0	0	0	0	0	0	0	0	0.000209853	0.000268063	0	0	0	0.000123779	0	0	0	0	0	0	0	0	0	0
ZOTU8168	0	0	0	0	0	0.000499831	0	0	0	3.50552e-05	0	0	0	0	0	0	0	0	0	0	0	0	0	0	0	0	0	0	0	0	0	0	0	0	0.000659848	0.000322928	0	5.10064e-05	1.30293e-05	0	0	0	0	0	0	0	0	0	0
ZOTU2948	0.000266454	0	0	0	0	0	0	0	0	0	0	0	0	0	0	0	0	0.00131516	0	0	0	0	0	0	0	0	0	0	0	0	0	0	0	0	0	0	0	0	0	0	0	0	0	0	0	0	0	0	0
ZOTU3251	8.47807e-05	0	0	0	0	0	0	0	0	0	0	0	0	0	0	0	0	0.00125959	0.00012672	0	0	0	8.11234e-06	0	0	0	0	0	0	0	0	0	0	0	4.12405e-05	0	0	0	5.86319e-05	0	0	0	0	0	0	0	0	0	0
ZOTU3269	0	0	0	0	0	0	0	0	0	0	0	0	0	0	0	0	0	0	0	0	0	0	0	0	0	0	0	0	0	0	0	0	0	0	8.2481e-05	0	0	0	0	0	0	0	0.00149467	0	0	0	0	0	0
ZOTU3164	0	0	0	0	0	0	0	0	0	2.80442e-05	0	0	0	0	0	0	0	0	0	0	0	0	0	0	0	0	0	0	0	0	0	0	0	0.000187994	0.000350544	0.000753498	1.24207e-05	8.16102e-05	0	0	0.000137252	0	0	0	2.45563e-05	0	0	0	0
ZOTU2269	0	0	0	0	0	7.35045e-05	0	0	0	0	0	0	0	0	0	0	0	0	0	0	0	0	0	0	0	0	0	0	0	0	0	0	0	0.000974944	0.000288684	0.000197345	0	0	3.90879e-05	0	0	0	0	0	0	0	0	0	0
ZOTU1709	0	0	0	0	0	8.82055e-05	2.34381e-05	0	0	0	0	0	0	0	0	0	0	0	0	0	0	0	0	0	0	0	0	0	0	0	0	0	0	0.000957457	0.000329924	0.000107643	0	0	6.51466e-05	0	0	0	0	0	0	0	0	0	0
ZOTU3545	0	0	0	0	0	0	0	4.28807e-05	0	0	0	0	0	0	0	0	0	0	0	0	0	0	0	0	0	0	0	0	0	0	0	0	0	0	2.06203e-05	0	0.000149048	2.04025e-05	0.000827362	0	0.000509794	0	0	0	0	0	0	0	0
ZOTU4325	0	0	0	0	0	0	0	0	0	0	0	0	0	0	0	0	0	0	0	0	0	0	0	0	0	0	0	0	0.000323739	0	0	0	0.00108995	0	0	0	0	0	0	0	0	0	0	0	0	0	0	0	0
ZOTU2413	0	0	0	0	0	0	0	0	0	0	0	0	0	0	0	0	0	0	0	0	1.48282e-05	0	8.11234e-06	0.00136463	1.11838e-05	9.94221e-05	3.69181e-05	3.27912e-05	0	0	0	0	0	0	0	0	0	0	0	0	0	0	0	0	0	0	0	0	0
ZOTU7381	0	0	0	0	0	0.000102906	2.34381e-05	0	0	0	0	0	0	0	0	0	0	0	0	0	0	0	0	0	0	0	0	0	0	0	0	0	0	0.0011848	0.000144342	0.000107643	0	0	0	0	0	0	0	0	0	0	0	0	0
ZOTU4519	0	0	0	0	0	0.000176411	0.000222662	5.71743e-05	0	3.50552e-05	0	0	0	0	0	0	0	0	5.06881e-05	0	0	0	0	0	0	0	0	0	0	0.000134888	0	1.00422e-05	0	0	0.000577367	0.000215285	2.48413e-05	4.08051e-05	0	0	0	0	0	0	1.63709e-05	0	0	0	0
ZOTU4577	0	0	0	0	0	0	0	0	0	0	0	0	0	0	0	0	0	0	0	0	0	0	0	0	0	0	0	0	0	0	0	0	0	6.99512e-05	0.000659848	8.97022e-05	3.7262e-05	0	0.000703583	0	0	0	0	0	0	0	0	0	0
ZOTU4751	0	0	0	0	0	0	0	0	0	0	0	0	0	0	0	0	0	0	0	0	0	0	0	0	0	0	0	0	0	0	0	0	1.84737e-05	0	0	0	0	0	0	0	0	0	0	0	0	0.00153023	0	0	0
ZOTU5176	0.000266454	0	0	0	0	0.000220514	8.20335e-05	0	0	0	0	0	0	0	0	0	0	0.000407513	0	0	0	0	0	0	0	0	0	0	0	0	0	0	0	8.7439e-06	0.000371165	8.97022e-05	1.24207e-05	0	9.77199e-05	0	0	0	0	0	0	0	0	0	0
ZOTU8392	0	0	0	0	0	0	0	0	0.00035832	2.10331e-05	0	0	0	0	0	0	0	0	0	0	0	0	0	0	0	0	0	0	4.41462e-05	0	0	0	0	0	0	8.97022e-05	0	1.02013e-05	0	0	0	0	0	0.0010322	0	0	0	0	0
ZOTU4087	0	0	0	0	0	0	0	0	0	0	0	0	0	0	0	0	0	0	0	0	0	0	0	0	0	0	0	0	0.0001913	0.000192697	0	0	0	0	0	0	7.4524e-05	5.10064e-05	0	0	0.000529401	0	0	0.000516102	0	0	0	0	0
ZOTU7632	0	0	0	0	0	4.41027e-05	8.20335e-05	7.86147e-05	7.1664e-05	0	0	0	0	0	0	0	0	0	0	0	0	0	0	0	0	0	0	0	0	0	0	3.01265e-05	0	0	0	0.000322928	0.000248413	9.18114e-05	6.51466e-06	0	0	2.28917e-05	0.000342813	8.84747e-05	9.00399e-05	3.40051e-05	0	0	0
ZOTU4335	0	0	0	0	0	0	3.51572e-05	1.42936e-05	0.000286656	0.000112177	0	0	0	0	0	0	0	0	0	0.000396586	0	0	0	0	0	0	0	0	0	0	4.99092e-06	0	0	0	0	0.000340868	0.000149048	0.000214227	0	0	0	0	0	0	0	0	0	0	0
ZOTU2540	0	0	0	0	0	0	0	0	0	0	0	0	0	0	0	0	0	0	0	0	0	0	1.62247e-05	1.61495e-05	0.000246044	0.0011185	1.2306e-05	0.000142095	0	0	0	0	0	0	0	0	0	0	0	0	0	0	0	0	0	0	0	0	0
ZOTU8107	0	1.54272e-05	0	0	0	1.47009e-05	0.000117191	1.42936e-05	0	9.81547e-05	0	0	0	0	0	0	0	0	1.2672e-05	0	0	0	0	0	0	0	0	0	5.88616e-05	9.63484e-05	0	0	0	8.7439e-06	4.12405e-05	0.000143524	0.000310517	0.000510064	0	0	5.88224e-05	3.43375e-05	0	1.47458e-05	0	0	0	0	0
ZOTU6543	0	0	0	0	0	0.000514532	4.68763e-05	0	0	0	0	0	0	0	0	0	0	0	0	0	0	0	0	0	0	0	0	0	0	0	0	0	0	0.000730115	0.000185582	0	0	0	7.16612e-05	0	0	0	0	0	0	0	0	0	0
ZOTU3264	0	0	0	0	0	4.41027e-05	0	0	0	0	0	0	0	0	0	0	0	0	0	0	0	0	0	0	0	0	0	0	0	0	0	0	0	0.000205482	0.000948532	0.000251166	0	0	9.77199e-05	0	0	0	0	0	0	0	0	0	0
ZOTU1540	0	0	0	0	0	0	0	0	0	7.01105e-06	0	0	0	0	0	0	0	0	0	0	0	0	0	0	0	0	0	0	0	0	0	1.00422e-05	0	0	0	0	0	2.04025e-05	0	0	0	1.14458e-05	0	0	8.18545e-06	0	0	0	0
ZOTU7931	0	0	0	0	0	0.00064684	8.20335e-05	0	0	0	0	0	0	0	0	0	0	0	3.80161e-05	0	0	0	0	0	0	0	0	0	0	0	0	0	0	0.000533378	0.000185582	0	0	0	5.86319e-05	0	0	0	0	0	0	0	0	0	0
ZOTU6091	0	0	0	0	0	0.000117607	0.000117191	0	0	0	0	0	0	0	0	0	0	0	0.00025344	0	0	0	0	0	0	0	0	0	0	0	0	0	0	0.000104927	0.00080419	5.38213e-05	0	0	9.12052e-05	0	0	0	0	0	0	0	0	0	0
ZOTU6211	0	0	0	0	0	0	0	0	0.000214992	0	0	0	0	0	0	0	0	0	0	0	0	0	0	0	0	0	0	0	0	0	0	0	0	3.49756e-05	4.12405e-05	0.000179404	4.96827e-05	0.000683485	0	0	0.00023529	0.000103013	0	0	0	0	0	0	0
ZOTU6535	0	0	0	0	0	0.000264616	0.000281258	0.000114349	0	0	0	0	0	0	0	0	0	0	3.80161e-05	0	0	0	0	0	0	0	0	0	0	0	6.48819e-05	0.000120506	0	0	0.000433025	0.000143524	3.7262e-05	1.02013e-05	3.25733e-05	0	0	0	0	0	0	0	0	0	0
ZOTU8662	0	0	0	0	0	4.41027e-05	4.68763e-05	0	0	0	0	0	0	0	0	0	0	0	0	0	0	0	0	0	0	0	0	0	0	0	0	0	0	5.68353e-05	0.000412405	0.000197345	3.7262e-05	0	5.86319e-05	0	0.000568616	0	0	0.000117966	0	0	0	0	0
ZOTU5576	0	0	0	0	0	0.00032342	0.000187505	0	0.000429984	9.81547e-05	0	0	0	0	0	0	0	0	0.000266112	0	0	0	0	0	0	0	0	0	0	0	0	0	0	0.000100555	6.18608e-05	7.17618e-05	0	0	0	0	0	0	0	0	0	0	0	0	0
ZOTU9150	0	0	0	0	0	0	9.37526e-05	0.000121495	0	0	0	0	0	0	0	0	0	0	0	0	0	0	0	0	0	0	0	0	0.000206016	9.63484e-05	7.48637e-05	0	0	0	0	0.000251166	8.69446e-05	0.000255032	0	0	1.96075e-05	3.43375e-05	0.000233113	2.94916e-05	3.27418e-05	0	0	0	0
ZOTU2899	0	0	0	0	0	0	5.85954e-05	0	0	0.000224354	0	0	0	0	0	0	0	0	6.33601e-05	0.0003621	0	0	0	0	0	0	0	0	0	0.000269776	3.99273e-05	0	0	0	0	0.000179404	9.93653e-05	0.000122415	0	0	0	0.000114458	0	0	0	0	0	0	0
ZOTU4503	0	0	0	0	0	0	0	0.000350193	0.000143328	0	0	0	0	0	0	0	0	0	0	0	0	0	0	0	0	0	0	0	0	0	0	0	0	0	0	1.79404e-05	0.000471985	0.000132617	0	0	0.000196075	0.000206025	0	1.47458e-05	0	0	0	0	0
ZOTU9425	0	0	0	0	0	0	5.85954e-05	7.14679e-06	0	5.60884e-05	0	0	0	0	0	0	0	0	3.80161e-05	0	0	0	0	0	0	0	0	0	0	0	3.49364e-05	0	0	0	0	0	4.96827e-05	0.000183623	4.56026e-05	0	0.000470579	0.000251808	0	0.000398136	0	0	0	0	0
ZOTU2492	0	0	0	0	0	0	9.37526e-05	0.000871908	0	0	0	0	0	0	0	0	0	0	3.80161e-05	0.000103457	0	0	0	0	0	0	0	0	0	0	0	0	0	8.7439e-05	0.000164962	0.000125583	3.7262e-05	1.02013e-05	0	0	0	0	0	0	0	0	0	0	0
ZOTU5751	0	0	0	0	0	0.000191112	0.000210943	3.57339e-05	7.1664e-05	7.01105e-06	0	0	0	0	0	0	0	1.85233e-05	3.80161e-05	0	0	0	0	0	0	0	0	0	0	0	0	0	0	0	0.000164962	0.000197345	9.93653e-05	0.000214227	1.30293e-05	0.000119601	1.96075e-05	4.57834e-05	4.11376e-05	4.42373e-05	0	0	0	0	0
ZOTU4052	0	0	0	0	0	0	0	0	0	0	0	0	0	0	0	0	0	0	0	0	0	0	0	0	0	0	0	0	0	0	0	0	0	0	2.06203e-05	1.79404e-05	0	0	0	0.00148201	0	1.14458e-05	0	0	0	0	0	0	0
ZOTU2754	0	0	0	0	0	0	0	0	0	7.01105e-06	0	0	0	0	0	0	0	0	0	0	0	0	0	0	0	0	0	0	0.000103008	5.7809e-05	0.000558983	0.000110464	0.000129316	0	0	1.79404e-05	0	1.02013e-05	0	0	0	0	0	0	0.000474756	0	0	0	0
ZOTU3978	6.05576e-05	0.000632516	0	0	0	0	0	0	0	2.10331e-05	0	0	0	0	0	0	0	0	0	0	0	0	0	0	0	0	0	0	0	0	0	0	0	0	0	0	0	0	0	0	0	0	0	7.37289e-05	0	0	0	0	0
ZOTU7018	0	0	0	0	0	0	7.03144e-05	0	7.1664e-05	0	0	0	0	0	0	0	0	0	0	0	0	0	0	0	0	0	0	0	0.000132439	0.000115618	0	0	0	0	2.06203e-05	0	7.4524e-05	0.000102013	0	0	0.000901943	2.28917e-05	0	0	1.63709e-05	0	0	0	0
ZOTU2071	0	0	0	0	0	2.94018e-05	0	0	0	0	0	0	0	0	0	0	0	0	0	0	0	0	0	0	0	0	0	0	0	0	0	0	0	0	0	0	0	0	0	0.00149761	0	0	0	0	0	0	0	0	0
ZOTU2925	0	0	0	0	0	0.000308719	4.68763e-05	7.14679e-05	0	0	0	0	0	0	0	0	0	0	0.000177408	0	0	0	0	0	0	0	0	0	0	0	0	0	0	5.24634e-05	0.000618608	0.000251166	0	0	0	0	0	0	0	0	0	0	0	0	0
ZOTU2630	0.000266454	0.00119561	0	0	0	0	0	0	0	0	0	0	0	0	0	0	0	0	0	0	0	0	0	0	0	0	0	0	0	0	0	1.00422e-05	0	0	0	0	0	0	0	0	0	0	0	0	0	3.40051e-05	0	0	0
ZOTU4142	0	0	0	0	0	0	0	0	0	0	0	0	0	0	0	0	0	0	0	0	0	0	0	0	0	0	0	0	0	0.00150303	0	0	0	0	0	0	0	0	0	0	0	0	0	0	0	0	0	0	0
ZOTU5039	0	0	0	0	0	0.000279317	0.00012891	0	0	0	0	0	0	0	0	0	0	0	0	0	0	0	0	0	0	0	0	0	0	0	0	0	0	0.000883133	0.000226823	0	0	0	0	0	0	0	0	0	0	0	0	0	0
ZOTU5381	0	0	0	0	0	0	2.34381e-05	5.71743e-05	0.000143328	8.41326e-05	0	0	0	0	0	0	0	0.000259326	0	0.000258643	0	0	0	0	0	0	0	0	0	0	3.49364e-05	0	0.00049879	0	0	0	0	3.06038e-05	0	0	0	0.000103013	0	0	2.45563e-05	0	0	0	0
ZOTU3668	0	0	0	0	0	0.000617438	1.17191e-05	0	0	0	0	0	0	0	0	0	0	0	0	0	0	0	0	0	0	0	0	0	0	0	0	0	0	0	0.000577367	0.000304987	0	0	0	0	0	0	0	0	0	0	0	0	0
ZOTU8049	0	0	0	0	0	0	0	0	0	0.000182287	0	0	0	0	0	0	0	0	0	0	0	0	0	0	0	0	0	0	0.000500324	0.00131034	7.48637e-05	4.01687e-05	0	0	0	1.79404e-05	0	0	0	0	0	0	0	0	0.000302862	0	0	0	0
ZOTU6575	0	0	0	0	0	0.000426326	0	0	0	0	0	0	0	0	0	0	0	0.000574223	0	0	0	0	0	0	0	0	0	0	0	0	0	0	0	0.000345384	8.2481e-05	5.38213e-05	0	0	1.9544e-05	0	0	0	0	0	0	0	0	0	0
ZOTU8269	0	0	0	0	0	0.000176411	4.68763e-05	0	0	6.30994e-05	0	0	0	0	0	0	0	0.00011114	6.33601e-05	0	0	0	0	0	0	0	0	0	0	0	0	0	0	0.000109299	0.000474266	0.000340868	2.48413e-05	5.10064e-05	3.90879e-05	0	0	0	0	0	0	0	0	0	0
ZOTU8755	0	0	0	0	0	0.000426326	0.000140629	0.000278725	0.000143328	0	0	0	0	0	0	0	0	0	0	0	0	0	0	0	0	0	0	0	0	0	0	0	0	0.000113671	0.000206203	0.000107643	0	8.16102e-05	0	0	0	0	0	0	0	0	0	0	0
ZOTU5464	0	0	0	0	0	0.000661541	2.34381e-05	0	0	0	0	0	0	0	0	0	0	0.000740933	5.06881e-05	0	0	0	0	0	0	0	0	0	0	0	0	0	0	1.31158e-05	0	0	0	0	0	0	0	0	0	0	0	0	0	0	0
ZOTU5491	0	0	0	0	0	0.000249915	0	3.57339e-05	0	0	0	0	0	0	0	0	0	0	0	0	0	0	0	0	0	0	0	0	0	0	0	0	0	0.000751975	0.000103101	3.58809e-05	1.24207e-05	1.02013e-05	1.30293e-05	0	0.000274504	0	0	0	0	0	0	0	0
ZOTU4298	0	0	0	0	0	0.000147009	4.68763e-05	0.000485982	0	0	0	0	0	0	0	0	0	0	8.87042e-05	0	0	0	0	0	0	0	0	0	1.47154e-05	0	0	0	0	0	4.12405e-05	5.38213e-05	1.24207e-05	0	5.21173e-05	0	1.96075e-05	5.72292e-05	0.000466226	0	0	0	0	0	0
ZOTU4161	0	0	0	0	0	0.000588036	0.000117191	7.86147e-05	0.000143328	0	0	0	0	0	0	0	0	0	1.2672e-05	0	0	0	0	0	0	0	0	0	0	0	0	0	0	3.93475e-05	0.000329924	8.97022e-05	7.4524e-05	1.02013e-05	0	0	0	0	0	0	0	0	0	0	0
ZOTU8174	0	0	0	0	0	0.000382224	1.17191e-05	0.000128642	0	0	0	0	0	0	0	0	0	0	1.2672e-05	0	0	0	0	0	0	0	0	0	0	0	0	0	0	0	0.000515506	0.000179404	9.93653e-05	7.14089e-05	0	0	0	8.01209e-05	0	0	0	0	0	0	0
ZOTU4687	0	0	0	0	0	0	0	0	0	0	0	0	0	0	0	0	0	0	0	0	0	0	0	0	0	0	0	0	0	0	0	0	0	0	0	0	0	0	0	0	0	0	0	0	0	0	0.000188397	0.00048173	0
ZOTU3816	0	0	0	0	0	0.000852653	0.000117191	0	0	0	0	0	0	0	0	0	0	0	0	0	0	0	0	0	0	0	0	0	0	0	0	0	0	2.18597e-05	0.000144342	0.000322928	0	2.04025e-05	0	0	0	0	0	0	0	0	0	0	0
ZOTU5914	0	0	0	0	0	0.00080855	0	6.43211e-05	0	0	0	0	0	0	0	0	0	0	0	0	0	0	0	0	0	0	0	0	0	0	0	0	0	0	0.000329924	0.000125583	0.000149048	0	0	0	0	0	0	0	0	0	0	0	0
ZOTU6963	0.000121115	4.62817e-05	1.37675e-05	0	0	0	0	0	0	0	0.00072223	0	0	0	0	0	0	0	3.80161e-05	0.000534529	0	0	0	0	0	0	0	0	0	0	0	0	0	0	0	0	0	0	0	0	0	0	0	0	0	0	0	0	0
ZOTU6035	0	0	0	0	0	0.00016171	0	0	0	0	0	0	0	0	0	0	0	0	0	0	0	0	0	0	0	0	0	0	0	0	0	0	0	0.000778207	0.000268063	1.79404e-05	0	0	0.000247557	0	0	0	0	0	0	0	0	0	0
ZOTU6228	0	0	0	0	0	0	0	0	7.1664e-05	0.000175276	0	0	0	0	0	0	0	0	0	0	0	0	0	0	0	0	0	0	0.000235446	0	0	0.000110464	0	0	2.06203e-05	0.000143524	0.000223572	0.000377447	0	0	0	5.72292e-05	0	0	0	0	0	0	0
ZOTU3043	0.00144127	0	0	0	0	0	0	0	0	0	0	0	0	0	0	0	0	0	0	0	0	0	0	0	0	0	0	0	0	0	0	0	0	0	0	0	0	0	2.60586e-05	0	0	0	0	0	0	0	0	0	0
ZOTU4593	0	0	0	0	0	0.00016171	0	0	0	0	0	0	0	0	0	0	0	0.00105583	0	0	0	0	0	0	0	0	0	0	0	0	0	0	0	4.37195e-06	8.2481e-05	0	0	0	0.000162866	0	0	0	0	0	0	0	0	0	0
ZOTU2622	0	0	0	0	0	0	0	0	0	0	0	0	0	0	0	0	0	0	0	0	0	0	0	0	0	0	0	0	0	0	0	0	0	0	0	3.58809e-05	0	0	0	0	0	0	0	0	0.00138334	0	0	0	0
ZOTU9168	0	0.000347112	4.13024e-05	0	0	0	0	0	0	0	0	0	0	0	0	0	0	0	0	0	0	0	0.00103027	3.2299e-05	1.11838e-05	0	0	0	0	0	0	0	0	0	0	0	0	0	0	0	0	0	0	0	0	0	0	0	0
ZOTU8617	0	0	0	0	0	0	0	0	0	0	0	0	0	0	0	0	0	0	0	0	0	0	0	0	0	0	0	0	0.000264877	0.000404663	0.000479128	9.03796e-05	0.000221684	0	0	0	0	0	0	0	0	0	0	0	0	0	0	0	0
ZOTU6523	0	0	0	0	0	0.000779148	1.17191e-05	0	0	0	0	0	0	0	0	0	0	0	0	0	0	0	0	0	0	0	0	0	0	0	0	0	0	8.7439e-05	0.000226823	0.000322928	0	0	3.25733e-05	0	0	0	0	0	0	0	0	0	0
ZOTU6755	0	0	0	0	0	0	7.03144e-05	4.28807e-05	7.1664e-05	0	0	0	0	0	0	0	0	0	0	0	0	0	0	0	0	0	0	0	0	0	0	0	0	2.18597e-05	0.000618608	0.000233226	4.96827e-05	6.12076e-05	0	0	0.000254897	3.43375e-05	0	0	0	0	0	0	0
ZOTU4383	0	0	0	0	0	0.000279317	9.37526e-05	8.57615e-05	0	0	0	0	0	0	0	0	0	0.000296373	0	0	0	0	0	0	0	0	0	0	1.47154e-05	0	0	0	0	0	0	0.000161464	3.7262e-05	3.06038e-05	7.81759e-05	0	0	0	0	0	0.000376531	0	0	0	0
ZOTU1678	0	0	0	0	0	0	0	0	0	0	0	0	0	0	0	0	0	0	0	0	0	0	0	0	0	0	0	0	0	0	0	0	0	0	0	0	4.96827e-05	0	0	0.00140401	0	0	0	0	0	0	0	0	0
ZOTU4661	0	0	0	0	0	0	0	0	0.00035832	0.000154243	0	0	0	0	0	0	0	0	0	0	0	0	0	0	0	0	0	0	0.000132439	0.000308315	0	0.000100422	3.69474e-05	0	0	5.38213e-05	3.7262e-05	0.000112214	0	0	9.80373e-05	2.28917e-05	0	0	0	0	0	0	0
ZOTU5938	0	0	0	0	0	0	0.00025782	1.42936e-05	0	0	0	0	0	0	0	0	0	0	3.80161e-05	0	0	0	0	0	0	0	0	0	0	0	0	0	0	4.37195e-05	0.000309304	0.000466451	0.000260834	5.10064e-05	6.51466e-06	0	0	0	0	0	0	0	0	0	0
ZOTU4368	0	0	0	0	0	0.000632139	0.000117191	0	0	0	0	0	0	0	0	0	0	0.000296373	1.2672e-05	0	0	0	0	0	0	0	0	0	0	0	0	0	0	0.000144274	8.2481e-05	8.97022e-05	0	0	7.16612e-05	0	0	0	0	0	0	0	0	0	0
ZOTU3888	7.26691e-05	0	0	0	0	0.000823251	1.17191e-05	0	0	0	0	0	0	0	0	0	0	0.000240803	0	0	0	0	0	0	0	0	0	0	0	0	0	0	0	6.99512e-05	0.000144342	1.79404e-05	0	0	6.51466e-05	0	0	0	0	0	0	0	0	0	0
ZOTU9080	0	0	0	0	0	0	2.34381e-05	7.14679e-06	0	2.10331e-05	0	0	0	0	0	0	0	0	0	0	0	0	0	0	0	0	0	0	0.000515039	3.85394e-05	1.49727e-05	0.000381603	0	0	0	3.58809e-05	0	0.000183623	0	0	0	1.14458e-05	0	0	0.000212822	0	0	0	0
ZOTU2255	0.000181673	0	0	0	0	0	8.20335e-05	0	0	0	0	0	0	0	0	0	0	0	0	0	0	0	0.000916694	4.03737e-05	0	0	0	0	0	0	0	0	0	0	6.18608e-05	0.000143524	0	0	0	0	0	0	0	0	0	0	0	0	0
ZOTU6537	0.000121115	0	0	0	0	0.000470429	0.000187505	0	0	0	0	0	0	0	0	0	0	0	0.000101376	0	0	0	0	0	0	0	0	0	0	0	0	0	0	3.06036e-05	0.000123722	0.000197345	4.96827e-05	0	0.000143322	0	1.96075e-05	0	0	0	0	0	0	0	0
ZOTU3631	2.4223e-05	0.0014193	0	0	0	0	0	0	0	0	0	0	0	0	0	0	0	0	0	0	0	0	0	0	0	0	0	0	0	0	0	0	0	0	0	0	0	0	0	0	0	0	0	0	0	0	0	0	0
ZOTU8429	0	0	0	0	0	0	0	0	0.000143328	2.80442e-05	0	0	0	0	0	0	0	0	0	0	0	0	0	0	0	0	0	0	0	0	5.9891e-05	0	0	0	0	0.000269107	0.000422303	0.000520265	0	0	0	0	0	0	0	0	0	0	0
ZOTU6396	0	0	0	0	0	0	0.000140629	3.57339e-05	0	7.01105e-06	0	0	0	0	0	0	0	0	0	1.72429e-05	0	0	0	0	0	0	0	0	0	1.92697e-05	0	0	0	8.7439e-06	8.2481e-05	7.17618e-05	7.4524e-05	0.000122415	0	0	0.000372542	5.72292e-05	0.000150838	0.00028017	0	0	0	0	0
ZOTU9091	0.000629799	0.000485957	0	0	0	4.41027e-05	1.17191e-05	0	0	0	0	0	0	0	0	0	0	5.557e-05	5.06881e-05	0	0	0	6.48987e-05	8.07474e-06	0	0	0	0	0	0	0	0	0	0	0	8.97022e-05	0	0	0	0	0	0	0	0	0	0	0	0	0
ZOTU3365	0	0	0	0	0	0	0	0	0	0	0	0	0	0	0	0	0	0	0	0	0	0	0	0	0	0	0	0	0	0	0	0	0	0	0	0	2.48413e-05	0	0	0	0	0	0	0.0014156	0	0	0	0	0
ZOTU8489	0	0	0	0	0	0.000308719	1.17191e-05	3.57339e-05	0	0	0	0	0	0	0	0	0	0	0	0	0	0	0	0	0	0	0	0	0.000103008	5.7809e-05	0	0	0	0.000297292	0.000164962	0.000107643	3.7262e-05	0	9.12052e-05	0	0.000215682	0	0	0	8.18545e-06	0	0	0	0
ZOTU2585	0	0	0	0	0	0	0	0	0.000143328	6.30994e-05	0	0	0	0	0	0	0	0	0	0	0	0	0	0	0	0	0	0	0	0	0	0	0	0	0	0	0.000720398	0.000499862	0	0	0	1.14458e-05	0	0	0	0	0	0	0
ZOTU3884	0	0	0	0	0	0	0	0	0	0	0	0	0	0	0	0	0	0	0	0	0	0	0	0	0	0	0	0	0	0	4.99092e-06	0.00126531	0.000166263	0	0	0	0	0	0	0	0	0	0	0	0	0	0	0	0
ZOTU6027	3.63346e-05	0	0	0	0	0	2.34381e-05	0	7.1664e-05	2.10331e-05	0	0	0	0	0	0	0	0	0.000114048	0	0	0	0	0	0	0	0	0	0	0	5.9891e-05	0	0	3.06036e-05	0.000556747	0.000430571	0	9.18114e-05	0	0	0	0	0	0	0	0	0	0	0
ZOTU5789	0	0	0	0	0	0	1.17191e-05	0.000335899	0	0	0	0	0	0	0	0	0	0	0	0	0	0	0	0	0	0	0	0	0	0	0	0	0	4.37195e-05	2.06203e-05	3.58809e-05	1.24207e-05	2.04025e-05	7.16612e-05	0	0.000882336	0	0	0	0	0	0	0	0
ZOTU1527	0	0	0	0	0	8.82055e-05	0	0	0	0	0	0	0	0	0	0	0	0	0	0	0	0	0	0	0	0	0	0	0	0	0	0	0	0.00116294	0.000164962	1.79404e-05	0	0	0	0	0	0	0	0	0	0	0	0	0
ZOTU3607	0	0	0	0	0	0	0	0	0	0	0	0	0	0	0	0	0	0.00129663	0	0	0	0	0	0	0	0	0	0	0	0	0	0	0	0	0	3.58809e-05	9.93653e-05	0	0	0	0	0	0	0	0	0	0	0	0
ZOTU4868	7.26691e-05	0	0	0	0	0	0	0	0	0	0	0	0	0	0	0	0	0.00129663	0	0	0	0	0	0	0	0	0	0	0	0	0	0	0	0	6.18608e-05	0	0	0	0	0	0	0	0	0	0	0	0	0	0
ZOTU2517	1.21115e-05	0	0	0	0	2.94018e-05	0.000164067	0.000521716	0	0	0	0	0	0	0	0	0	0	3.80161e-05	1.72429e-05	0	0	0	0	0	0	0	0	0	0	0	0	0	0	0.000350544	0.000179404	7.4524e-05	1.02013e-05	1.30293e-05	0	1.96075e-05	0	0	0	0	0	0	0	0
ZOTU9258	0	0	0	0	0	0.000235215	2.34381e-05	0	0	0	0	0	0	0	0	0	0	1.85233e-05	0	0	0	0	8.11234e-06	0	0	0	0	0	0	0	0	0	0	4.37195e-05	6.18608e-05	5.38213e-05	0	0	0.000983713	0	0	0	0	0	0	0	0	0	0
ZOTU3928	0	0	0	0	0	0	0	0	0	0	0	0	0	0	0	0	0	0	0	0	0	0	0.00141966	8.07474e-06	0	0	0	0	0	0	0	0	0	0	0	0	0	0	0	0	0	0	0	0	0	0	0	0	0
ZOTU3616	0	0	0	0	0	0.00064684	1.17191e-05	0	0	0	0	0	0	0	0	0	0	0.000463083	0	0	0	0	8.11234e-06	0	0	0	0	0	0	0	0	0	0	9.61829e-05	8.2481e-05	5.38213e-05	0	0	6.51466e-05	0	0	0	0	0	0	0	0	0	0
ZOTU2450	0	0	0	0	0	4.41027e-05	1.17191e-05	0.000307312	7.1664e-05	0	0	0	0	0	0	0	0	0	0	0	0	0	0	0	0	0	0	0	5.88616e-05	0	9.98183e-06	0	0	3.93475e-05	0	7.17618e-05	7.4524e-05	0	0	0.000546005	0	0	0	0.000191695	0	0	0	0	0
ZOTU5147	7.26691e-05	0	0	0	0	0.000867354	0	0	0	0	0	0	0	0	0	0	0	0.00011114	0	0	0	0	8.11234e-06	0	0	0	0	0	0	0	0	0	0	0.000288549	2.06203e-05	5.38213e-05	0	0	0	0	0	0	0	0	0	0	0	0	0
ZOTU2676	0	0	0	0	0	0.00016171	0.000515639	0.000300165	7.1664e-05	1.40221e-05	0	0	0	0	0	0	0	0	0	0	0	0	0	0	0	0	0	0	0	0	0	0	0	0	2.06203e-05	3.58809e-05	0.000248413	2.04025e-05	3.25733e-05	0	0	0	0	0	0	0	0	0	0
ZOTU2778	0.000641911	0	0	0	0	0	0	0	0	0	0	0	0	0	0	0	0	0.000777979	0	0	0	0	0	0	0	0	0	0	0	0	0	0	0	0	0	0	0	0	0	0	0	0	0	0	0	0	0	0	0
ZOTU2086	0	0	0	0	0	0	0	0	0	0	0	0	0	0	0	0	0	0	0	0	0	0	0	0	0	0	0	0	0	0	0	0	0	0	0	0	0	0	0	0	0	0	0	0	0.00135878	0	0	0	0
ZOTU8324	0	0.00027769	0	0	0	0	2.34381e-05	0.000114349	0	2.10331e-05	0	0	0	0	0	0	0	0	0.000114048	0	0	0	0	0	0	0	0	0	0	3.85394e-05	0	0	0	0	0.000185582	0.000125583	0.000360199	6.12076e-05	4.56026e-05	0	0	0	0	0	4.91127e-05	0	0	0	0
ZOTU2606	0	0	0	0	0	0.000279317	1.17191e-05	0	0	0	0	0	0	0	0	0	0	0	0	0	0	0	0	0	0	0	0	0	0	0	0	0	0	0.000974944	4.12405e-05	3.58809e-05	0	0	7.16612e-05	0	0	0	0	0	0	0	0	0	0
ZOTU8197	0	0	0	0	0	0	1.17191e-05	0	0	0	0.000674082	0	0	0	0	0	0	0	0	0	0	0	8.11234e-06	0	0	0	0	0	0.000103008	3.85394e-05	0	0	0	3.49756e-05	0	3.58809e-05	0	0	0.000508143	0	0	0	0	0	0	0	0	0	0
ZOTU2952	0	0	0	0	0	0	0.000152348	0	0	0	0	0	0	0	0	0	0	0	0	0	0	0	0	0	0	0	0	0	0	0	0	0	0	4.80914e-05	8.2481e-05	0.000107643	0	0	0.000885993	0	0.000137252	0	0	0	0	0	0	0	0
ZOTU4889	0.000230119	0	0	0	0	0.000294018	1.17191e-05	5.71743e-05	0	7.01105e-06	0	0	0	0	0	0	0	0	0.000316801	0	0	0	6.48987e-05	0	0	0	0	0	0	0	0	0	0	0.000118043	0.000206203	0.000107643	0	0	0	0	0	0	0	0	0	0	0	0	0
ZOTU7040	0	0	0	0	0	0	0	0	0	7.71215e-05	0	0	0	0	0	0	0	0	0	0	0	0	0	0	0	0	0	0	0	1.92697e-05	0	0	0	0	0	3.58809e-05	0	1.02013e-05	0	0	3.92149e-05	8.01209e-05	0	0	0.000491127	5.66752e-05	0	0	0
ZOTU6677	0	0	0	0	0	0.000338121	3.51572e-05	0	0	0	0	0	0	0	0	0	0	0	0	0	0	0	0	0	0	0	0	0	0	0	0	0	0	1.74878e-05	0.000309304	0.000125583	0	0	0.000130293	0	0.000450972	0	0	0	0	0	0	0	0
ZOTU3435	0	0	0	0	0	0	0	0	0	0	0	0	0	0	0	0	0	0	0	0	0	0	0	0	0	0	0	0	0	0	0	0	0	0	2.06203e-05	0	0.000136627	0	0	0	0	0	0.00124784	0	0	0	0	0	0
ZOTU9526	0	0	0	0	0	0.00032342	3.51572e-05	2.14404e-05	0	5.60884e-05	0	0	0	0	0	0	0	0	3.80161e-05	0	0	0	0	0	0	0	0	0	0	0	0	0	0	0.000253573	0.000288684	0.000179404	0.000111786	7.14089e-05	0	0	0	2.28917e-05	0	0	0	0	0	0	0
ZOTU7403	0	0	0	0	0	0	0	0	0	0	0	0	0	0	0	0	0	0	0	0	0	0	0	0	0	0	0	0	0	0	0	0	0	0.000559609	0	0	0	0	0.000840391	0	0	0	0	0	0	0	0	0	0
ZOTU3820	0	0	0	0	0	0	0	0	0.000214992	0.00039963	0	0	0	0	0	0	0	0	0	0	0	0	0	0	0	0	0	0	0	0	2.99455e-05	8.03374e-05	0	0	0	0.000269107	9.93653e-05	0.000204025	0	0	0	4.57834e-05	0	0	8.18545e-06	0	0	0	0
ZOTU5817	0.00071458	0	0	0	0	1.47009e-05	0	0	0	0	0	0	0	0	0	0	0	0.000463083	0	0	0	0	0	0	0	0	0	0	0	0	0	0	0	0.000109299	6.18608e-05	1.79404e-05	0	0	1.30293e-05	0	0	0	0	0	0	0	0	0	0
ZOTU4892	0.000811472	0	0	0	0	0	0	0	0	0	0	0	0	0	0	0	0	0.000574223	0	0	0	0	0	0	0	0	0	0	0	0	0	0	0	8.7439e-06	0	0	0	0	0	0	0	0	0	0	0	0	0	0	0
ZOTU4989	0.000230119	0.000393394	0	0	0	0.000117607	7.03144e-05	0	0	0	0	0	0	0	0	0	0	0	0.000278784	0	0	0	0	0	0	0	0	0	0	0	0	0	0	0	0.000268063	3.58809e-05	0	0	0	0	0	0	0	0	0	0	0	0	0
ZOTU8474	0	0	0	0	0	0.000573335	0	0	0	0	0	0	0	0	0	0	0	0	0	0	0	0	0	0	0	0	0	0	0	0	0	0	0	0.000480914	0.000185582	5.38213e-05	0	0	9.77199e-05	0	0	0	0	0	0	0	0	0	0
ZOTU5141	0	0	0	0	0	0.000396925	0	0	0	0	0	0	0	0	0	0	0	0	0	0	0	0	0	0	0	0	0	0	0	0	0	0	0	5.68353e-05	0.000123722	1.79404e-05	0	0	0.000794788	0	0	0	0	0	0	0	0	0	0
ZOTU8234	0	0	0.00104633	0.000234911	0	0	0	0	0	0	0	0	0	0	0	0	0	0	0	0	0	0	0.00010546	0	0	0	0	0	0	0	0	0	0	0	0	0	0	0	0	0	0	0	0	0	0	0	0	0	0
ZOTU7119	0	0	0	0	0	0.000367523	0.000363291	2.14404e-05	0	0	0	0	5.92796e-06	0	0	0	0	0	0	0	0	0	0	0	0	0	0	0	0	0	0	0	0	0	2.06203e-05	0.000125583	0	0	0.000482085	0	0	0	0	0	0	0	0	0	0
ZOTU4061	0	0	0	0	0	2.94018e-05	1.17191e-05	5.71743e-05	0.000429984	0.000175276	0	0	0	0	0	0	0	0	0	0	0	0	0	0	0	0	0	0	0	0	0	0	0	6.12073e-05	6.18608e-05	0.000269107	0.000235993	2.04025e-05	0	0	0	3.43375e-05	0	0	0	0	0	0	0
ZOTU5895	0.000617688	1.54272e-05	0	0	0	8.82055e-05	2.34381e-05	0	0	0	0	0	0	0	0	0	0	0.000351943	7.60321e-05	0	0	0	0	0	0	0	0	0	0	0	0	0	0	0	6.18608e-05	0.000107643	3.7262e-05	0	6.51466e-06	0	0	0	0	0	0	0	0	0	0
ZOTU2184	0	0	0	0	0	0	4.68763e-05	0	0	2.10331e-05	0	0	0	0	0	0	0	0	0	0	0	0	0	0	0	0	0	0	0	0	0.000633846	0	0.000314053	0	0	0.000269107	4.96827e-05	5.10064e-05	0	0	0	0	0	0	0	0	0	0	0
ZOTU5913	0	0	0	0	0	7.35045e-05	0	0	0	0	0	0	0	0	0	0	0	0	0	0	0	0	0	0	0	0	0	0	0	0	0	0	0	0.00126786	2.06203e-05	1.79404e-05	0	0	0	0	0	0	0	0	0	0	0	0	0
ZOTU3986	0	0	0	0	0	0	0	0	0	0	0	0	0	0	0	0	0	0	5.06881e-05	0	0	0	0	0	0	0	0	0	0	0	0	0	0	0	0	0	0	0	0	0	0.00133331	0	0	0	0	0	0	0	0
ZOTU6391	0	0	0	0	0	0.000529233	5.85954e-05	0	7.1664e-05	4.90773e-05	0	0	0	0	0	0	0	0	0	0	0	0	0	0	0	0	0	0	0	5.7809e-05	0	0.000311307	0.000129316	8.7439e-06	0	5.38213e-05	6.21033e-05	4.08051e-05	0	0	0	1.14458e-05	0	0	0	0	0	0	0
ZOTU5195	0	0	0	0	0	0	0	0	0	0	0	0	0	0	0	0	0	0	0	0	4.44846e-05	0.00133934	0	0	0	0	0	0	0	0	0	0	0	0	0	0	0	0	0	0	0	0	0	0	0	0	0	0	0
ZOTU7674	0	0	0	0	0	4.41027e-05	0.000351572	2.85872e-05	7.1664e-05	2.10331e-05	0	0	0	0	0	0	0	0	0	0	0	0	0	0	0	0	0	0	2.94308e-05	1.92697e-05	0	0	0	4.37195e-06	4.12405e-05	0.000107643	7.4524e-05	2.04025e-05	0	0	0.000215682	0	0.000246826	0	0.000106411	0	0	0	0
ZOTU3557	0	0	0	0	0	0	0	0	7.1664e-05	0	0	0	0	0	0	0	0	0	0	0	0	0	0	0	0	0	0	0	0	0.000192697	0	0	0	6.55792e-05	0	0.000215285	2.48413e-05	9.18114e-05	0	0	0	0.000125904	0	0	0	0	0.000269138	6.02163e-05	0
ZOTU4560	0	0	0	0	0	0.000514532	7.03144e-05	0	0	0	0	0	0	0	0	0	0	0	0	0	0	0	0	0	0	0	0	0	0	0	0	0	0	0.000131158	0.000329924	0.000322928	1.24207e-05	0	0	0	0	0	0	0	0	0	0	0	0
ZOTU5130	0	0	0	0	0	4.41027e-05	4.68763e-05	0	0	0	0	0	0	0	0	0	0	0	0	0	0	0	0	0	0	0	0	0	0	0	0	0	0	0	0.000309304	3.58809e-05	0	0	0.000944625	0	0	0	0	0	0	0	0	0	0
ZOTU8219	0	0	0	0	0	0.000147009	0	5.00275e-05	0	5.60884e-05	0	0	0	0	0	0	0	0	0	0	0	0	0	0	0	0	0	0	0	0	0	0	0	0	0.000144342	0	0.000161469	4.08051e-05	8.46906e-05	0	0	0.000228917	0.000466226	0	0	0	0	0	0
ZOTU5702	0	0	0	0	0	0	0	1.42936e-05	0	1.40221e-05	0	0	0	0	0	0	0	0	1.2672e-05	0.000224157	0	0	0	0	0	0	0	0	5.88616e-05	0	4.49182e-05	1.00422e-05	0	0	0	0	4.96827e-05	6.12076e-05	0	0	0	0	0	0.000855255	0	3.40051e-05	0	0	0
ZOTU7418	0	0	0	0	0	0.000205813	0	0	0	0	0	0	0	0	0	0	0	0	0	0	0	0	0	0	0	0	0	0	0	0	0	0	0	0.000236085	2.06203e-05	8.97022e-05	0	0	7.81759e-05	0	0.000745083	0	0	0	0	0	0	0	0
ZOTU4617	0	0	0	0	0	0.000102906	0	0	0	0	0	0	0	0	0	0	0	0.00116697	0	0	0	0	0	0	0	0	0	0	0	0	0	0	0	0	0.000103101	0	0	0	0	0	0	0	0	0	0	0	0	0	0
ZOTU6595	0	0	0	0	0	0.000176411	3.51572e-05	0	0	0	0	0	0	0	0	0	0	0.000426036	0	0	0	0	0	0	0	0	0	0	0	0	0	0	0	0	4.12405e-05	8.97022e-05	6.21033e-05	2.04025e-05	0.000345277	0	0.000176467	0	0	0	0	0	0	0	0
ZOTU4340	0	0	0	0	0	0.000176411	0.00025782	0.000728972	0	0	0	0	0	0	0	0	0	0	0	0	0	0	0	0	0	0	0	0	0	0	0	0	0	0	4.12405e-05	0	2.48413e-05	0	0.000143322	0	0	0	0	0	0	0	0	0	0
ZOTU5042	0	0	0	0	0	0	0.000164067	0	0.000143328	0	0	0	0	0	0	0	0	0	5.06881e-05	0	0	0	0	0	0	0	0	0	0	0	0	0	0	7.86951e-05	0.000226823	0.000269107	0	0	0.000104235	0	0.000333327	0	0	0	0	0	0	0	0
ZOTU4396	0	0	0	0	0	0	0	0	0	7.01105e-05	0	0	0	0	0	0	0	0	0	0	0	0	0	0	0	0	0	0	1.47154e-05	0	0	4.01687e-05	0	2.18597e-05	0	0	0	0	0	0	0	0	0	0	0.0004502	3.40051e-05	0	0	0
ZOTU9313	0	0	0	0	0	0.000205813	0	0	0	0	0	0	0	0	0	0	0	0	2.5344e-05	0	0	0	0	0	0	0	0	0	0	0	0	0	0	0.000441567	0.000123722	8.97022e-05	0	0	0.000482085	0	0	0	0	0	0	0	0	0	0
ZOTU2571	0	0	0	0	0	0	0	0	0	0	0	0	0	0	0	0	0	0	0	0	0	0	0	0	0	0	0	0	0	0	0	0	0	0	0	0	0	0	0	0	0	0	0	0	0	0.000521412	0	0	0
ZOTU4978	0	0	0	0	0	0.000705644	2.34381e-05	0	0	0	0	0	0	0	0	0	0	0	0	0	0	0	0	0	0	0	0	0	0	0	0	0	0	0.00015739	8.2481e-05	3.58809e-05	0	0	0.000358306	0	0	0	0	0	0	0	0	0	0
ZOTU3632	0	0	0	0	1.50152e-05	0.000249915	7.03144e-05	6.43211e-05	0.000143328	0	0	0	0	0	0	0	0	1.85233e-05	0.000468865	0	0	0	0	0	0	0	0	0	0	0	0	0	0	3.93475e-05	0.000123722	0.000107643	6.21033e-05	0	0	0	0	0	0	0	0	0	0	0	0
ZOTU4331	0	0	0	0	0	0.000338121	0	0	0	0	0	0	0	0	0	0	0	0	0	0	0	0	0	0	0	0	0	0	0	0	0	0	0	0.000222969	0.000453646	0.000179404	1.24207e-05	0	0.000156352	0	0	0	0	0	0	0	0	0	0
ZOTU4302	7.26691e-05	0	0	0	0	8.82055e-05	0	0	0	0	0	0	0	0	0	0	0	0.00103731	3.80161e-05	0	0	0	0	0	0	0	0	0	0	0	0	0	0	2.62317e-05	2.06203e-05	0	0	0	7.81759e-05	0	0	0	0	0	0	0	0	0	0
ZOTU6568	0	0	0	0	0	0.000514532	0	0	0	0	0	0	0	0	0	0	0	0	0	0	0	0	0	0	0	0	0	0	0	0	0	0	0	0.000109299	0	1.79404e-05	0	0	0.000716612	0	0	0	0	0	0	0	0	0	0
ZOTU4895	0	0	0	0	0	0	0	0	0.00035832	0.00013321	0	0	0	0	0	0	0	0	0	0	0	0	0	0	0	0	0	0	0	0	0	0	0	0	6.18608e-05	7.17618e-05	2.48413e-05	0.000193824	0	0	0	0.000160242	0	0.000353899	0	0	0	0	0
ZOTU6659	0.000339123	0	0	0	0	0	0	0	0	0	0	0	0	0	0	0	0	0.000889119	0	0	0	0	0	0	0	0	0	0	0	0	0	0	0	0	0.000103101	0	2.48413e-05	0	0	0	0	0	0	0	0	0	0	0	0
ZOTU8338	0.000835695	0	0	0	0	0.000235215	4.68763e-05	0	0	0	0	0	0	0	0	0	0	0	0	0	0	0	8.11234e-06	8.07474e-06	0	0	0	0	0	0	0	0	0	0	4.12405e-05	5.38213e-05	0	0	0.000123779	0	0	0	0	0	0	0	0	0	0
ZOTU6368	0	0	0	0	0	0	5.85954e-05	0	0	2.80442e-05	0.000625933	0	0	0	0	0	0	0	7.60321e-05	0	0	0	0	0	0	0	0	0	2.94308e-05	0	0	0	0	0.000284177	0	1.79404e-05	0	1.02013e-05	0.000221498	0	0	0	0	0	0	0	0	0	0
ZOTU9582	0	0	0	0	0	1.47009e-05	9.37526e-05	0	7.1664e-05	0	0	0	0	0	0	0	0	0	0	0	0	0	0	0	0	0	0	0	0	7.70787e-05	4.99092e-06	0	0	2.18597e-05	0.000309304	0.000287047	0	3.06038e-05	0	0	0	0	0.000438801	0	0	0	0	0	0
ZOTU3311	0	0	0	0	0	8.82055e-05	4.68763e-05	6.43211e-05	0.000143328	0.000231365	0	0	0	0	0	0	0	0	5.06881e-05	0	0	0	0	0	0	0	0	0	0	0	4.99092e-05	0	0	0	0	0.000125583	0	0.000428453	5.21173e-05	0	0	6.8675e-05	0	0	0	0	0	0	0
ZOTU8373	0	0	0	0	0	0	0	0	0	0	0	0	0	0	0	0	0	0	0	0	0	0	0	0	0	0	0	0	0	0	0	0	0	0	0	0	0	0	0	0	0	0	0	0	0	0.000124685	9.86839e-05	0	0
ZOTU6681	0	0	0	0	0	0	0	0	0.000143328	7.01105e-05	0	0	0	0	0	0	0	0	0	0	0	0	0	0	0	0	0	0	0.000632762	0	6.98728e-05	0	0	2.62317e-05	2.06203e-05	0.000197345	0	3.06038e-05	0	0	0	0	0	0	8.18545e-06	0	0	0	0
ZOTU8604	0	0	0	0	0	0.000220514	0	3.57339e-05	7.1664e-05	0.000168265	0	0	0	0	0	0	0	0	0	0	0	0	0	0	0	0	0	0	0	0	0	0	0	3.49756e-05	0.000103101	1.79404e-05	1.24207e-05	2.04025e-05	0.00065798	0	0	0	0	0	0	0	0	0	0
ZOTU4985	0	0	0	0	0	0	0.000398448	0.000164376	0	0	0	0	0	0	0	0	0	0	0	0	0	0	0	0	0	0	0	0	0	0	0	0	0	0.000131158	0.000329924	0.000161464	4.96827e-05	1.02013e-05	9.77199e-05	0	0	0	0	0	0	0	0	0	0
ZOTU9307	0	1.54272e-05	0	0	0	0	0	0	0	0	0	0	0	0	0	0	0	0	0	0	0.000266908	0.00106031	0	0	0	0	0	0	0	0	0	0	0	0	0	0	0	0	0	0	0	0	0	0	0	0	0	0	0
ZOTU8592	0	0	0	0	0	0.000249915	8.20335e-05	0	0	0	0	0	0	0	0	0	0	0.00011114	0	0	0	0	0	0	0	0	0	0	0	0	0	0	0	3.93475e-05	0.000474266	0.000215285	0	0	0.000169381	0	0	0	0	0	0	0	0	0	0
ZOTU8054	0	0	0	0	0	7.35045e-05	0.000210943	0.000142936	0	4.90773e-05	0	0	0	0	0	0	0	0	0	0	0	0	0	0	0	0	0	0	0	0	4.99092e-06	9.03796e-05	0	0	0	0.000125583	0.000211151	0.000193824	0	0	0	0.000228917	0	0	0	0	0	0	0
ZOTU9521	0.000205896	0	0	0	0	0.000220514	5.85954e-05	0.000135789	0	0	0	0	0	0	0	0	0	0	2.5344e-05	0	0	0	0	0	0	0	0	0	0	0	0	0	0	8.7439e-06	0	1.79404e-05	9.93653e-05	0	0.000358306	0	0.000117645	9.15667e-05	0	0	0	0	0	0	0
ZOTU6417	0	0	0	0	0	0.000588036	3.51572e-05	0	0	0	0	0	0	0	0	0	0	0	0	0	0	0	0	0	0	0	0	0	0	0	0	0	0	0.000371616	0.000123722	0.000215285	0	0	0	0	0	0	0	0	0	0	0	0	0
ZOTU5630	0	0	0	0	0	8.82055e-05	0.000222662	9.29082e-05	0.000214992	1.40221e-05	0	0	0	0	0	0	0	0	0	0	0	0	0	0	0	0	0	0	0	0	0	0	0	1.74878e-05	0.000206203	0.000161464	0	2.04025e-05	0	0	0	0	0	0.000294916	0	0	0	0	0
ZOTU7382	0	0	0	0	0	0.000117607	7.03144e-05	0	0	0	0	0	0	0	0	0	0	0	0	0	0	0	0	0	0	0	0	0	0	0	0	0	0	0.000668908	4.12405e-05	0.000251166	0	0	0.00018241	0	0	0	0	0	0	0	0	0	0
ZOTU2852	0	0	0	0	0	0	0	0.00017867	0	0	0	0	0	0	0	0	0	0	0	0	0	0	0	0	0	0	0	0	0	0	0	0	0	0	0	0	0	0	0	0	0	0	0.00115185	0	0	0	0	0	0
ZOTU3380	0	0	0	0	0	0.00108787	0	0	0	0	0	0	0	0	0	0	0	0	0	0	0	0	0	0	0	0	0	0	0	0	0	0	0	0.000139902	8.2481e-05	1.79404e-05	0	0	0	0	0	0	0	0	0	0	0	0	0
ZOTU6272	0	0	0	0	0	0.000191112	0.000105472	0	0	1.40221e-05	0	0	0	0	0	0	0	0.00022228	8.87042e-05	0	0	0	0	0	0	0	0	0	0	3.85394e-05	3.49364e-05	0	0	0	0.000268063	0.000322928	2.48413e-05	0	0	0	0	0	0	0	1.63709e-05	0	0	0	0
ZOTU9753	0	0	0	0	0	0.00016171	3.51572e-05	2.85872e-05	0	2.10331e-05	0	0	0	0	0	0	0	0	3.80161e-05	0	0	0	0	0	0	0	0	0	0	0	0	0	0	4.37195e-06	0.000474266	0.000143524	3.7262e-05	7.14089e-05	0	0	0	0.000148796	0	0.000162204	0	0	0	0	0
ZOTU6266	0	0	0	0	0	0	0	0.000100055	0	0	0	0	0	0	0	0	0	0	0	0	0	0	0	0	0	0	0	0	0	0.000115618	0	0	0	0	0.000144342	0.000107643	8.69446e-05	5.10064e-05	0	0	0.000549009	0.000171688	0	0	0	0	0	0	0
ZOTU3748	0.000278565	0.00101048	0	0	0	0	0	0	0	0	0	0	0	0	0	0	0	0	0	3.44857e-05	0	0	0	0	0	0	0	0	0	0	0	0	0	0	0	0	0	0	0	0	0	0	0	0	0	0	0	0	0
ZOTU3034	0	0	0	0	0	0	0	0	0	0.000140221	0	0	0	0	0	0	0	0	0	0	0	0	0	0	0	0	0	0	0.000765201	0.000211966	5.49001e-05	0	0	0	0	8.97022e-05	0	6.12076e-05	0	0	0	0	0	0	0	0	0	0	0
ZOTU5164	0	0	0	0	0	0.000249915	0	0	0	0	0	0	0	0	0	0	0	0.000833549	0	0	0	0	0	0	0	0	0	0	0	0	0	0	0	9.18109e-05	8.2481e-05	0	0	0	6.51466e-05	0	0	0	0	0	0	0	0	0	0
ZOTU9199	0	0	0	0	0	0.000176411	7.03144e-05	0.000657504	0	0	0	0	0	0	0	0	0	0.00022228	0	0	0	0	0	0	0	0	0	0	0	0	0	0	0	0	4.12405e-05	0	2.48413e-05	0	0.000130293	0	0	0	0	0	0	0	0	0	0
ZOTU7821	0	0	0	0	0	0.000147009	2.34381e-05	0	0	0	0	0	0	0	0	0	0	0	0	0	0	0	0	0	0	0	0	0	0	0	0	0	0	0.00098806	2.06203e-05	0	0	0	0.000143322	0	0	0	0	0	0	0	0	0	0
ZOTU142	0	0	0	0	0	0	0	0	0	0	0	0	0	0	0	0	0	0	0	0	0	0	0	8.07474e-06	0	0	0	0	0	0	0	0	0	0	0	0	0	0	0	0	0	0	0	0	0	0	0	0	0
ZOTU4831	0	0	0	0	0	5.88036e-05	0	0	0	0	0	0	0	0	0	0	0	0.00109288	2.5344e-05	0	0	0	0	0	0	0	0	0	0	0	0	0	0	8.7439e-05	0	0	0	0	5.21173e-05	0	0	0	0	0	0	0	0	0	0
ZOTU4550	0	0	0	0	0	0	3.51572e-05	0	0	2.80442e-05	0	0	0	0	0	0	0	0.000370466	5.06881e-05	0	0	0	0	0	0	0	0	0	0	0	0	0	0	0	6.18608e-05	1.79404e-05	0	0	0.00037785	0	0.000372542	0	0	0	0	0	0	0	0
ZOTU3479	0	0	0	0	0	0	0	0	0	0	0	0	0	0	0	0	0	0	0	0	0	0	0	0	0	0	0	0	0	0	0	0	0	0	0	0	0	0	0	0	0	0	0	0	0	0.00123552	0	0	0
ZOTU6307	0	0	0	0	0	4.41027e-05	0.00037501	3.57339e-05	0	0	0	0	0	0	0	0	0	0	0	0	0	0	0	0	0	0	0	0	2.94308e-05	7.70787e-05	0	0	0	0	0.000226823	0.000269107	8.69446e-05	0	0.000169381	0	0	0	0	0	0	0	0	0	0
ZOTU5672	4.84461e-05	0	0	0	0	0.000338121	3.51572e-05	7.14679e-06	0	0	0	0	0	0	0	0	0	0	1.2672e-05	0	0	0	0	0	0	0	0	0	0	0	0	0	0	0	0.000288684	0.000143524	9.93653e-05	0	0.000104235	0	0.00023529	0	0	0	0	0	0	0	0
ZOTU3363	0	0	0	0	0	0	0	0	0	0	0	0	0	0	0	0	0	0	0	0	0	0	0	0	0	0	0	0	0	1.92697e-05	0	0	0	0	0	3.58809e-05	0	8.16102e-05	0	0	0	0.000343375	0	0	0.000744876	0	0	0	0
ZOTU5426	0	0	0	0	0	0	0	0	7.1664e-05	9.81547e-05	0	0	0	0	0	0	0	0	2.5344e-05	0.000137943	0	0	0	0	0	0	0	0	0	0.000520281	8.48456e-05	0	0.000110842	0	0	0	1.24207e-05	4.08051e-05	0.000117264	0	0	9.15667e-05	0	0	0	0	0	0	0
ZOTU4144	0.000339123	0	0	0	0	0	0	0	0	0	0	0	0	0	0	0	0	0.000963213	0	0	0	0	0	8.07474e-06	0	0	0	0	0	0	0	0	0	0	0	0	0	0	0	0	0	0	0	0	0	0	0	0	0
ZOTU7880	0	0	0	0	0	0.000102906	0	0	0	0	0	0	0	0	0	0	0	0.00109288	0	0	0	0	0	0	0	0	0	0	0	0	0	0	0	0	2.06203e-05	0	0	0	9.12052e-05	0	0	0	0	0	0	0	0	0	0
ZOTU4824	0	0	0	0	0	0.00064684	4.68763e-05	5.00275e-05	0	0	0	0	0	0	0	0	0	0	0	0	0	0	0	0	0	0	0	0	0	0	1.49727e-05	0	0	0	2.06203e-05	0.000251166	3.7262e-05	1.02013e-05	0.000228013	0	0	0	0	0	0	0	0	0	0
ZOTU9229	0	0	0	0	0	0.00032342	7.03144e-05	9.29082e-05	0	0	0	0	0	0	0	0	0	0	0	0	0	0	0	0	0	0	0	0	0	0	0	0	0	1.31158e-05	0.000371165	5.38213e-05	0.000124207	0	0.000254072	0	0	0	0	0	0	0	0	0	0
ZOTU4545	3.63346e-05	0	0	0	0	0	0	5.71743e-05	0	0	0	0	0	0	0	0	0	0	0	0	0	0	0	0	0	0	0	0	0	0	0	0	0	0	0.000144342	1.79404e-05	2.48413e-05	0	0	0	0.00101959	0	0	0	0	0	0	0	0
ZOTU3303	0	0	0	0	0	0.000308719	1.17191e-05	7.14679e-06	0	0	0	0	0	0	0	0	0	0	0	0	0	0	0	0	0	0	0	0	0	0	0	0	0	0.000174878	6.18608e-05	1.79404e-05	0	0	0.000716612	0	0	0	0	0	0	0	0	0	0
ZOTU3388	0	0	0	0	0	0	2.34381e-05	0	0	0	0	0	0	0	0	0	0	0	1.2672e-05	0	0	0	0	0	0	0	0	0	0	0	0	0	0	4.37195e-05	4.12405e-05	8.97022e-05	6.21033e-05	1.02013e-05	0	0	0	0	0.00101473	0	0	0	0	0	0
ZOTU4605	0	0	0	0	0	0.00117607	8.20335e-05	0	0	0	0	0	0	0	0	0	0	0	0	0	0	0	0	0	0	0	0	0	0	0	0	0	0	0	0	1.79404e-05	0	0	1.9544e-05	0	0	0	0	0	0	0	0	0	0
ZOTU2830	0	0	0	0	0	0	0.000234381	0.000150083	0	0	0	0	0	0	0	0	0	0	8.87042e-05	0	0	0	0	0	0	0	0	0	0	0	0	0	0	0.00013553	0.000350544	0.000251166	0	8.16102e-05	0	0	0	0	0	0	0	0	0	0	0
ZOTU9513	0	0	0	0	0	0.000102906	0	0	0	0	0	0	0	0	0	0	0	0	0	0	0	0	0	0	0	0	0	0	0	0	0	0	0	0.000782579	0.000350544	5.38213e-05	0	0	0	0	0	0	0	0	0	0	0	0	0
ZOTU5941	0	0	0	0	0	0.000382224	0	0	0	0	0	0	0	0	0	0	0	0	0	0	0	0	0	0	0	0	0	0	0	0	0	0	0	2.62317e-05	0.000185582	0.000125583	4.96827e-05	3.06038e-05	0.000390879	0	9.80373e-05	0	0	0	0	0	0	0	0
ZOTU8430	0	0	0	0	0	0	0	0	0	4.90773e-05	0	0	0	0	0	0	0	0	0	0	0	0	0	0	0	0	0	0	8.82924e-05	0	2.99455e-05	0.00110464	0	0	0	0	0	0	0	0	0	0	0	0	1.63709e-05	0	0	0	0
ZOTU8000	0	0.000154272	0	0	0	0.000191112	0	0	7.1664e-05	0	0	0	0	0	0	0	0	0	1.2672e-05	0	0	0	0	0	0	0	0	0	0	0	0	0	0	3.06036e-05	0	0.000143524	0	0	0.000684039	0	0	0	0	0	0	0	0	0	0
ZOTU2789	0	0	0	0	0	0.000470429	0.000117191	0	0	0	0	0	0	0	0	0	0	0	0	0	0	0	0	0	0	0	0	0	0	0	0	0	0	0.000292921	0.000185582	7.17618e-05	1.24207e-05	0.000102013	0	0	0	3.43375e-05	0	0	0	0	0	0	0
ZOTU7939	0	0	0	0	0	0	0	0	7.1664e-05	0.000161254	0	0	0	0	0	0	0	0	0	0	0	0	0	0	0	0	0	0	8.82924e-05	0.000134888	2.49546e-05	0	0.000184737	0	0	0	0	0.000122415	5.21173e-05	0	0	0.000434942	0	0	0	1.1335e-05	0	0	0
ZOTU7498	0	0	0	0	0	0	2.34381e-05	1.42936e-05	0.000286656	5.60884e-05	0	0	0	0	0	0	0	0	5.06881e-05	0	0	0	0	0	0	0	0	0	0	0.000231236	0	0	0	0	0	3.58809e-05	0.000211151	0.000112214	0	0	0.000215682	3.43375e-05	0	1.47458e-05	0	0	0	0	0
ZOTU3384	0	0	0	0	0	0	0	0	0	4.90773e-05	0	0	0	0	0	0	0	0	0	0	0	0	0	0	0	0	0	0	0	0	0	0	0	0	0	0	0	0	0	0	0	1.14458e-05	0	0	0.000130967	0.00103149	0	0	0
ZOTU6304	0	0	0	0	0	0.000411625	4.68763e-05	5.00275e-05	0	0	0	0	0	0	0	0	0	0	0	0	0	0	0	0	0	0	0	0	0	0	0	0	0	0.000209853	0.000309304	1.79404e-05	0	4.08051e-05	0.00019544	0	0	0	0	0	0	0	0	0	0
ZOTU4478	3.63346e-05	0	0	0	0	0.000940858	7.03144e-05	0	0	0	0	0	0	0	0	0	0	0	0	0	0	0	0	0	0	0	0	0	0	0	0	0	0	0	0.000144342	8.97022e-05	0	0	0	0	0	0	0	0	0	0	0	0	0
ZOTU5317	2.4223e-05	0	0	0	0	1.47009e-05	0.000187505	7.86147e-05	0	0	0	0	0	0	0	0	0	0	7.60321e-05	0	0	0	0	0	0	0	0	0	0	7.70787e-05	0	0	0	2.18597e-05	0.000433025	0.000304987	6.21033e-05	0	0	0	0	0	0	0	0	0	0	0	0
ZOTU2768	0	0	0	0	0	0	0	0	0	0	0	0	0	0	0	0	0	0	0	0	0	0	0	0	0	0	0	0	0	0	0	0	0	0	0	0	0	0	0	0	0	0	0	0	0	0	0	0.000529903	0
ZOTU2504	0	0	0	0	0	0	0	0	0	0	0	0	0	0	0	0	0	0	0	0	0	0	0	0	0	0	0	0	0	0	0	0	0	0	0	0	0	0	0	0	0	0	0	0	0	0	0	0.00105981	0
ZOTU3708	0	0	0	0	0	4.41027e-05	0.000117191	0.00104343	0	7.01105e-06	0	0	0	0	0	0	0	0	0	0	0	0	0	0	0	0	0	0	0	0	0	0	0	1.74878e-05	2.06203e-05	1.79404e-05	0	1.02013e-05	0	0	0	0	0	0	0	0	0	0	0
ZOTU2436	0	0	0	0	0	0	0	0	0	0	0	0	0	0	0	0	0	0	0	0	0	0	0	0	0	0	0	0	0	0	0	0	0	0	0	0	1.24207e-05	0	0	0	0	0	0	0	0	0	0.000439592	0.000361298	0
ZOTU5468	0	0	0	0	0	0	0	0	0.000214992	2.80442e-05	0	0	0	0	0	0	0	0	0	8.62143e-05	0	0	0	0	0	0	0	0	0.000573901	7.70787e-05	0.000179673	0	0	0	0	3.58809e-05	0	2.04025e-05	0	0	0	0	0	0	5.72981e-05	0	0	0	0
ZOTU3067	0	0	0	0	0	0.000294018	0.000304696	0	0	0	0	0	0	0	0	0	0	0	8.87042e-05	0	0	0	0	0	0	0	0	0	0	0	0	0	0	9.61829e-05	0.000391785	3.58809e-05	0	6.12076e-05	0	0	0	0	0	0	0	0	0	0	0
ZOTU4199	0	0	0	0	0	0	0	0.000321605	0.000143328	0	0	0	0	0	0	0	0	0	0	0	0	0	0	0	0	0	0	0	0	0	0	0	0	0	0.000515506	0.000215285	0	4.08051e-05	0	0	0	3.43375e-05	0	0	0	0	0	0	0
ZOTU7341	0.000484461	0	0	0	0	7.35045e-05	0.000105472	0.000536009	0	0	0	0	0	0	0	0	0	0	0	0	0	0	2.4337e-05	8.07474e-06	0	0	0	0	0	0	0	0	0	0	2.06203e-05	1.79404e-05	0	0	0	0	0	0	0	0	0	0	0	0	0
ZOTU5531	0	0	0	0	0	0	0	0	7.1664e-05	1.40221e-05	0	0	0	0	0	0	0	0	0	0	0	0	0	0	0	0	0	0	0	0.000173427	0	0	0	0	0	0	0	0.000306038	0	0	0	2.28917e-05	0	0	0	0.000646097	0	0	0
ZOTU2886	0	3.08544e-05	0	0	0	0	3.51572e-05	4.28807e-05	7.1664e-05	7.01105e-05	0	0	0	0	0	0	0	0	1.2672e-05	0	0	0	0	0	0	0	0	0	7.3577e-05	0.000154157	9.98183e-06	8.03374e-05	0	1.31158e-05	0	8.97022e-05	0.000310517	0.000204025	0	0	0	0	6.85627e-05	0	0	0	0	0	0
ZOTU7761	0	0	0	0	0	0.000117607	0.000117191	0.000135789	0	0	0	0	0	0	0	0	0	0	0	0	0	0	0	0	0	0	0	0	0	0	0	0	0	3.49756e-05	0.000474266	8.97022e-05	0.000235993	6.12076e-05	0	0	0	0	0	0	0	0	0	0	0
ZOTU7688	0	0	0	0	0	0	0	0	0	0	0	0	0	0	0	0	0	0.000907643	0	0	0	0	0	0	0	0	0	0	0	0	0	0	0	0	6.18608e-05	0.000179404	0	0	0	0	0.000117645	0	0	0	0	0	0	0	0
ZOTU3278	0	0	0	0	0	0	0	0	0	2.10331e-05	0	0	0	0	0	0	0	0	0	0	0	0	0	0	0	0	0	0	0	5.7809e-05	4.99092e-05	0	0.000129316	0	0	0	0	0	0	0	0	0	0	0	0	0	0	0	0
ZOTU9430	0	0	0	0	0	0	0	0	0	0	0	0	0	0	0	0	0	0	0	0	0	0	0.0012493	1.61495e-05	0	0	0	0	0	0	0	0	0	0	0	0	0	0	0	0	0	0	0	0	0	0	0	0	0
ZOTU6837	3.63346e-05	0	0.000247814	0	0	0	0	0	0	0	0	0	0	0	0	0	0	0	0	0	0	0	4.05617e-05	0.000839773	0.000100654	0	0	0	0	0	0	0	0	0	0	0	0	0	0	0	0	0	0	0	0	0	0	0	0
ZOTU5053	7.26691e-05	0	0	0	0	0.000661541	0	2.85872e-05	0	0	0	0	0	0	0	0	0	0	0	0	0	0	0	0	0	0	0	0	0	0	0	0	0	0	0.000226823	0.000125583	0	0	0.000149837	0	0	0	0	0	0	0	0	0	0
ZOTU5325	0	0	0	0	0	0.000176411	1.17191e-05	5.00275e-05	0	0	0	0	0	0	0	0	0	0	0	0	0	0	0	0	0	0	0	0	0	0	0.000573955	0	0	0.000205482	0.000144342	8.97022e-05	1.24207e-05	0	0	0	0	0	0	0	0	0	0	0	0
ZOTU8500	0	0	0	0	0	1.47009e-05	3.51572e-05	2.85872e-05	0.000143328	0	0	0	0	0	0	0	0	0	0	0	0	0	0	0	0	0	0	0	7.3577e-05	0	0.000114791	0	0	0	0.000123722	0.000340868	0.000211151	9.18114e-05	0	0	0	1.14458e-05	0	0	8.18545e-06	1.1335e-05	0	0	0
ZOTU4351	0	0	0	0	0	0.000367523	0.000140629	0	0	3.50552e-05	0	0	0	0	0	0	0	0	0	0	0	0	0	0	0	0	0	0	2.94308e-05	0	0	0	0	7.86951e-05	8.2481e-05	0	4.96827e-05	0.000142818	0	0	0.000333327	0	0	0	0	0	0	0	0
ZOTU7427	0	0	0	0	0	0	2.34381e-05	0.000142936	0	0	0	0	0	0	0	0	0	0	0.000101376	0.000793172	0	0	0	0	0	0	0	0	4.41462e-05	0	0	0	0	0	0	1.79404e-05	0.000136627	0	0	0	0	0	0	0	0	0	0	0	0
ZOTU4314	7.26691e-05	0	0	0	0	0	0	0	0	0	0	0	0	0	0	0	0	0.000944689	0	0	0	0	0	0	0	0	0	0	0	0	0	0	0	0	0	0	0	0	0.000241042	0	0	0	0	0	0	0	0	0	0
ZOTU7685	0	0	0	0	0	0.000558635	8.20335e-05	0	0	0	0	0	0	0	0	0	0	0	0	0	0	0	0	0	0	0	0	0	0	0	0	0	0	0.000402219	2.06203e-05	1.79404e-05	0	0	0.000175896	0	0	0	0	0	0	0	0	0	0
ZOTU4495	0	0	0	0	0	0.000720345	0	0	0	0	0	0	0	0	0	0	0	0.00016671	0	0	0	0	0	0	0	0	0	0	0	0	0	0	0	0.000249201	0.000103101	1.79404e-05	0	0	0	0	0	0	0	0	0	0	0	0	0
ZOTU5625	0	0	0	0	0	0.000235215	3.51572e-05	0	0	0	0	0	0	0	0	0	0	0	0	0	0	0	0	0	0	0	0	0	0	0	0	0	0	0	8.2481e-05	0.000161464	0	0	0.000742671	0	0	0	0	0	0	0	0	0	0
ZOTU5060	6.05576e-05	0	0	0	0	8.82055e-05	8.20335e-05	0	0	0	0	0	0	0	0	0	0	0	0.00012672	0	0	0	0	0	0	0	0	0	0	0	0	0	0	0	8.2481e-05	0.000107643	4.96827e-05	0	0.000228013	0	0.000431364	0	0	0	0	0	0	0	0
ZOTU4678	0	0	0	0	0	2.94018e-05	0.000527358	2.85872e-05	0	0	0	0	0	0	0	0	0	0	6.33601e-05	0	0	0	0	0	0	0	0	0	0	0	0	0	0	0	4.12405e-05	0	0	0	0	0.000504404	5.88224e-05	0	0	0	0	0	0	0	0
ZOTU2293	0	0	0	0	0	7.35045e-05	0	0	0	0	0	0	0	0	0	1.43497e-05	0	0	0	0	0	0	0	0	0	0	0	0	0	0	0	0	0	0.000778207	0.000350544	3.58809e-05	0	0	0	0	0	0	0	0	0	0	0	0	0
ZOTU4685	0	0	0	0	0	0.000147009	0.000210943	0.000393073	0	0	0	0	0	0	0	0	0	0	0	0	0	0	0	0	0	0	0	0	0	0	0	0	0	0	0.000206203	0.000125583	6.21033e-05	4.08051e-05	6.51466e-05	0	0	0	0	0	0	0	0	0	0
ZOTU4016	0	0	0	0	0	0	0	0	0	2.10331e-05	0	0	0	0	0	0	0	0	0	0	0	0	0	0	0	0	0	0	0	0	0	0	0	0	2.06203e-05	0	1.24207e-05	0.000102013	0	0	0	0	0.000891314	0.00010322	7.3669e-05	0	0	0	0
ZOTU3376	0	0	0	0	0	0.00116137	7.03144e-05	0	0	0	0	0	0	0	0	0	0	0	0	0	0	0	0	0	0	0	0	0	0	0	0	0	0	0	0	1.79404e-05	0	0	0	0	0	0	0	0	0	0	0	0	0
ZOTU7776	0	0	0	0	0	0	0	0	0	0	0	0	0	0	0	0	0	0	0	0	0	0	0	0	0	0	0	0	0	0	0	0	0	0	0	0	0	5.10064e-05	0	0	0	3.43375e-05	0	0.000339153	0	0	0	0	0
ZOTU1242	0	0	0	0	0	0	0	0	0	0	0	0	0	0	0	0	0	0	0	0	0	0	7.30111e-05	0.00253547	7.82866e-05	0	0	0	0	0	0	0	0	0	0	0	0	0	0	0	0	0	0	0	0	0	0	0	0
ZOTU3960	0	0	0	0	0	0.000499831	2.34381e-05	0	0	0	0	0	0	0	0	0	0	0.000185233	0	0	0	0	0	0	0	0	0	0	0	0	0	0	0	6.12073e-05	0.000226823	0.000107643	0	0	0.000143322	0	0	0	0	0	0	0	0	0	0
ZOTU7320	0	0	0	0	0	0.000749746	3.51572e-05	0	0	0	0	0	0	0	0	0	0	0	0	0	0	0	0	0	0	0	0	0	0	0	0	0	0	6.99512e-05	0.000391785	0	0	0	0	0	0	0	0	0	0	0	0	0	0
ZOTU3361	0.00015745	0.00103362	5.50699e-05	0	0	0	0	0	0	0	0	0	0	0	0	0	0	0	0	0	0	0	0	0	0	0	0	0	0	0	0	0	0	0	0	0	0	0	0	0	0	0	0	0	0	0	0	0	0
ZOTU9185	0	0	0	0	0	0	0	0	0	0.000119188	0	0	0	0	0	0	0	0	1.2672e-05	0.000293129	0	0	0	0	0	0	0	0	0	0.000115618	0	0	0	2.18597e-05	2.06203e-05	0.000143524	0.000273255	0.000234629	0	0	0	1.14458e-05	0	0	0	0	0	0	0
ZOTU9160	0	0	0	0	0	0	0.000164067	4.28807e-05	0	0	0	0	0	0	0	0	0	0	0	0	0	0	0	0	0	0	0	0	1.47154e-05	0.000327585	8.98365e-05	0.000471982	3.69474e-05	0	0	0	0	7.14089e-05	0	0	0	0	0	0	0	0	0	0	0
ZOTU3403	0	0	0	0	0	0.000749746	0	0	0	0	0	0	0	0	0	0	0	0	0	0	0	0	0	0	0	0	0	0	0	0	0	0	0	3.49756e-05	0.000288684	5.38213e-05	0	0	0.000117264	0	0	0	0	0	0	0	0	0	0
ZOTU3774	0	0	0	0	0	0	0	0	7.1664e-05	5.60884e-05	0	0	0	0	0	0	0	0	0	0	0	0	0	0	0	0	0	0	0	7.70787e-05	0.00032441	0	0.000351	4.37195e-05	0	0	0	6.12076e-05	0	0	0	3.43375e-05	0	0.00010322	2.45563e-05	7.93453e-05	0	0	0
ZOTU3160	9.68922e-05	0.000239122	0.000275349	0.000198771	0	0	0	0	0	0	0.000433338	0	0	0	0	0	0	0	0	0	0	0	0	0	0	0	0	0	0	0	0	0	0	0	0	0	0	0	0	0	0	0	0	0	0	0	0	0	0
ZOTU8569	0	0	0	0	0	0	0	0	0	0	0	0	0	0	0	0	0	0	0	0	0	0	0	0	0	0	0	0	1.47154e-05	0	0	0	0	0	0	0	1.24207e-05	5.10064e-05	0	0	0.000470579	0	0	0	0.000466571	0	0	0	0
ZOTU3558	0	0	0	0	0	0	0	0	0	0	0	0	0	0	0	0	0	3.70466e-05	0	0	0	0.000855687	0	0	0	0	0	0.000218608	0	0	0	0	0	3.06036e-05	0	0	0	0	9.77199e-05	0	0	0	0	0	0	0	0	0	0
ZOTU4431	0	0.000185127	0	0	0	0	0	0	0	0	0	0	0	0	0	0	0	0	2.5344e-05	0	0	0	0	0	0	0	0	0	0	0	0	0	0	0	0.000247443	0	0	0	0	0	0	0	0.000781614	0	0	0	0	0	0
ZOTU7733	0	0	0	0	0	0.000132308	0	0	0	0	0	0	0	0	0	0	0	0	0	0	0	0	0	0	0	0	0	0	0	0	0	0	0	3.06036e-05	0.000206203	5.38213e-05	3.7262e-05	0	0.000775244	0	0	0	0	0	0	0	0	0	0
ZOTU4417	0	0	0	0	0	0	0	0	0	9.11436e-05	0	0	0	0	0	0	0	0	0	0	0	0	0	0	0	0	0	0	1.47154e-05	0.000462472	0	0	0	0	0	3.58809e-05	1.24207e-05	4.08051e-05	0	0	0	0	0	1.47458e-05	0.000204636	0	0	0	0
ZOTU9047	0	0	0	0	0	0.000499831	0	0	0	0	0	0	0	0	0	0	0	0	0	0	0	0	0	0	0	0	0	0	0	0	0	0	0	0.000533378	6.18608e-05	7.17618e-05	0	0	6.51466e-05	0	0	0	0	0	0	0	0	0	0
ZOTU5094	0	0	0	0	0	0.000338121	4.68763e-05	0	0	0	0	0	0	0	0	0	0	0	0	0	0	0	0	0	0	0	0	0	0	0	0	0	0	0.000415335	2.06203e-05	1.79404e-05	0	0	0.000390879	0	0	0	0	0	0	0	0	0	0
ZOTU6269	0	0	0	0	0	0.000573335	3.51572e-05	9.29082e-05	7.1664e-05	7.01105e-06	0	0	0	0	0	0	0	0	0	0	0	0	0	0	0	0	0	0	0	0	0	0	0	7.86951e-05	2.06203e-05	7.17618e-05	9.93653e-05	4.08051e-05	0.000136808	0	0	0	0	0	0	0	0	0	0
ZOTU5228	0	0	0	0	0	0	9.37526e-05	0	0	8.41326e-05	0	0	0	0	0	0	0	0	0	0	0	0	0	0	0	0	0	0	0	5.7809e-05	0	0	0	0	0	1.79404e-05	2.48413e-05	2.04025e-05	0	0	0.000745083	0.000183133	0	0	0	0	0	0	0
ZOTU7373	0	0	0	0	0	8.82055e-05	7.03144e-05	0	0	0	0	0	0	0	0	0	0	0	0	0	0	0	0	0	0	0	0	0	0	0	0	0	0	0.000450311	0.000185582	0.000125583	0	0	0.000306189	0	0	0	0	0	0	0	0	0	0
ZOTU8209	0	0	0	0	0	0	0	0	0	0	0	0	0	0	0	0	0	0	0	0	0	0	0	0	0	0	0	0	0	0	0	0	0	0.000563981	0.000247443	0.000179404	0	0	0.000234528	0	0	0	0	0	0	0	0	0	0
ZOTU5565	0	0.00027769	0	0	0	0.000294018	0	0	7.1664e-05	0	0	0	0	0	0	0	0	0	7.60321e-05	0	0	0	0	0	0	0	0	0	0	0	0	0	0	3.49756e-05	0.000144342	0.000269107	2.48413e-05	0	3.25733e-05	0	0	0	0	0	0	0	0	0	0
ZOTU6445	0.000109004	0	0	0	0	0.000176411	5.85954e-05	2.14404e-05	0	7.01105e-06	0	0	0	0	0	0	0	0.000185233	0.000164736	0	0	0	0	0	0	0	0	0	0	0	0	0	0	8.3067e-05	0.000185582	0.000197345	1.24207e-05	2.04025e-05	0	0	0	0	0	0	0	0	0	0	0
ZOTU3627	0	0	0	0	0	0	0.000175786	0.000150083	7.1664e-05	7.01105e-06	0	0	0	0	0	0	0	0	0	0	0	0	0	0	0	0	0	0	0.000132439	0.000154157	3.49364e-05	0	0	0	0	0.000197345	9.93653e-05	7.14089e-05	0	0	0	4.57834e-05	5.48501e-05	0	0	0	0	0	0
ZOTU2772	0	0	0	0	0	0	0	0	0	0	0	0	0	0	0	0	0	0	0	0	0	0	0	0	0	0	0	0	0	0	0	0	0	0	0.000164962	1.79404e-05	0	0	0.000488599	0	0.000549009	0	0	0	0	0	0	0	0
ZOTU9514	7.26691e-05	0	0	0	0	0	0	0	0	0	0	0	0	0	0	0	0	0.00061127	5.06881e-05	0	0	0	0	0	0	0	0	0	0	0	0	0	0	2.18597e-05	0.000433025	1.79404e-05	0	0	1.30293e-05	0	0	0	0	0	0	0	0	0	0
ZOTU8542	0	0	0	0	0	0	0	0	0	0.000140221	0	0	0	0	0	0	0	0	0	0	0	0	0	0	0	0	0	0	4.41462e-05	0	9.98183e-06	0.000170717	9.23685e-05	0	0	0.000107643	0	0.000316239	0	0	0	0	0	0.000339153	0	0	0	0	0
ZOTU3386	0	0	0	0	0	0	0	0	0	0.000147232	0	0	0	0	0	0	0	0	0	0	0	0	0	0	0	0	0	0	0.000470893	0.000423933	0	0	0	0	0	3.58809e-05	0	5.10064e-05	1.30293e-05	0	0	6.8675e-05	0	0	8.18545e-06	0	0	0	0
ZOTU8147	0	0	0	0	0	0	0.00012891	0.000128642	7.1664e-05	0	0	0	0	0	0	0	0	0	0	5.17286e-05	0	0	0	0	0	0	0	0	0	0	0	0	0	0.000104927	0.000103101	0.000376749	3.7262e-05	0	0	0	0.000215682	0	0	0	0	0	0	0	0
ZOTU4747	0	0	0	0	0	0	0	0.000114349	0.00035832	0.00033653	0	0	0	0	0	0	0	0	0	0	0	0	0	0	0	0	0	0	0.000117723	0	0	0	0	0	0	8.97022e-05	8.69446e-05	9.18114e-05	0	0	0	2.28917e-05	0	0	0	0	0	0	0
ZOTU7987	0.00115059	2.31408e-05	0	0	0	0	0	0	0	0	0	0	0	0	0	0	0	1.85233e-05	2.5344e-05	0	0	0	0	0	0	0	0	0	0	0	0	0	0	0	0	0	0	0	0	0	0	0	0	0	0	0	0	0	0
ZOTU6398	0	0	0	0	0	0.00016171	2.34381e-05	0	0	0	0	0	0	0	0	0	0	0	0	0	0	0	0	0	0	0	0	0	0	0	0	0	0	0.000904993	2.06203e-05	5.38213e-05	0	0	5.21173e-05	0	0	0	0	0	0	0	0	0	0
ZOTU4277	0	0	0	0	0	0.000220514	0	0	0	0	0	0	0	0	0	0	0	0	0	0	0	0	0	0	0	0	0	0	0	0	0	0	0	0	0.000886671	0.000107643	0	0	0	0	0	0	0	0	0	0	0	0	0
ZOTU6178	0.000302788	0	0	0	0	0.00016171	0	0	0	0	0	0	0	0	0	0	0	0.000240803	0	0	0	0	0	0	0	0	0	0	0	0	0	0	0	0	4.12405e-05	0.000430571	3.7262e-05	0	0	0	0	0	0	0	0	0	0	0	0
ZOTU7999	0	0	0	0	0	0.000543934	0	0	0	0	0	0	0	0	0	0	0	0	0	0	0	0	0	0	0	0	0	0	0	0	0	0	0	0.000559609	0	0	0	0	0.000110749	0	0	0	0	0	0	0	0	0	0
ZOTU1769	0	0	0	0	0	0.000235215	0	0	0	0	0	0	0	0	0	0	0	0	0	0	0	0	0	0	0	0	0	0	0	0	0	0	0	0.000839414	0.000103101	3.58809e-05	0	0	0	0	0	0	0	0	0	0	0	0	0
ZOTU4376	0	0	0	0	0	0.000176411	0.000187505	4.28807e-05	0	0	0	0	0	0	0	0	0	0	0	0	0	0	0	0	0	0	0	0	0	0	0	0	0	0.000109299	0.000391785	0.000304987	0	0	0	0	0	0	0	0	0	0	0	0	0
ZOTU3447	0	0	0	0	0	0	0	7.86147e-05	0	0	0	0	0	0	0	0	0	0	1.2672e-05	0	0	0	0	0	0	0	0	0	1.47154e-05	0	8.48456e-05	0	1.84737e-05	0	0	0	9.93653e-05	0	0	0	0	0	0	0	0	0	0	0	0
ZOTU4869	0	0	0	0	0	0	1.17191e-05	7.14679e-05	0.000143328	0	0	0	0	0	0	0	0	0	7.60321e-05	0	0	0	0	0	0	0	0	0	0.000765201	1.92697e-05	0	0	0	0	0	0	0.000124207	0	0	0	0	0	0	0	0	0	0	0	0
ZOTU6189	0	0	0	0	0	0	9.37526e-05	7.86147e-05	0	3.50552e-05	0	0	0	0	0	0	0	0	0	0	0	0	0	0	0	0	0	0	0	0	0	0	0	0	0	0.000143524	0.000235993	6.12076e-05	0	0	3.92149e-05	5.72292e-05	0.000274251	0.000191695	0	0	0	0	0
ZOTU4458	0	0	0	0	0	0	2.34381e-05	6.43211e-05	0	3.50552e-05	0	0	0	0	0	0	0	0	0.000152064	6.89715e-05	0	0	0	0	0	0	0	0	1.47154e-05	1.92697e-05	0	0	0	4.37195e-05	0.000288684	0.000215285	1.24207e-05	3.06038e-05	0	0	3.92149e-05	2.28917e-05	0.000178263	0	0	0	0	0	0
ZOTU6138	0	0	0	0	0	0.000470429	1.17191e-05	0	0	0	0	0	0	0	0	0	0	0.000240803	0	0	0	0	0	0	0	0	0	0	0	0	0	0	0	7.43231e-05	0.000164962	0.000107643	0	0	0.000136808	0	0	0	0	0	0	0	0	0	0
ZOTU8207	0	0	0	0	0	5.88036e-05	0	0	0	0	0	0	0	0	0	0	0	0.000259326	0	0	0	0	0	0	0	0	0	0	0	0	0	0	0	5.68353e-05	4.12405e-05	0.000340868	0	0	0.000449511	0	0	0	0	0	0	0	0	0	0
ZOTU3753	0	0	0	0	0	0	0	0	0	0	0	0	0	0	0	0	0	0	0	0	0	0	0	0	0	0	0	0	0	0	0	0	0	6.99512e-05	0.000989772	3.58809e-05	0	0	0.000110749	0	0	0	0	0	0	0	0	0	0
ZOTU7529	0	0	0	0	0	0.000426326	0	0	0	0	0	0	0	0	0	0	0	0	0	0	0	0	0	0	0	0	0	0	0	0	0	0	0	1.31158e-05	0.000103101	0.000448511	0	0	0.000214984	0	0	0	0	0	0	0	0	0	0
ZOTU6956	0	0	0	0	0	0.000294018	0	0	0	0	0	0	0	0	0	0	0	0	0	0	0	0	0	0	0	0	0	0	0	0	0	0	0	0.000161762	0.000247443	0.000215285	0	0	0.000286645	0	0	0	0	0	0	0	0	0	0
ZOTU3874	0	0	0	0	0	0.000396925	2.34381e-05	0	0	0	0	0	0	0	0	0	0	0	0	0	0	0	0	0	0	0	0	0	0	0	0	0	0	0.000227341	6.18608e-05	1.79404e-05	0	0	0.00047557	0	0	0	0	0	0	0	0	0	0
ZOTU5802	0	0	0	0	0	0.000661541	0	0	0	0	0	0	0	0	0	0	0	0	0	0	0	0	0	0	0	0	0	0	0	0	0	0	0	0.000327896	0.000123722	8.97022e-05	0	0	0	0	0	0	0	0	0	0	0	0	0
ZOTU3007	0	0	0	0	0	0.000147009	7.03144e-05	0	0	0	0	0	0	0	0	0	0	0	0	0	0	0	0	0	0	0	0	0	0	0	0	0	0	7.86951e-05	2.06203e-05	0	0	0	0.000885993	0	0	0	0	0	0	0	0	0	0
ZOTU5288	0	0	0	0	0	0	0.000410167	0.000214404	0	2.80442e-05	0	0	0	0	0	0	0	0	0	0	0	0	0	0	0	0	0	0	0.000103008	9.63484e-05	9.98183e-06	7.02952e-05	0	0	4.12405e-05	0.000197345	2.48413e-05	0	6.51466e-06	0	0	0	0	0	0	0	0	0	0
ZOTU3794	0	0	0	0	0	0.000132308	0	0	0	0	0	0	0	0	0	0	0	0	0	0	0	0	0	0	0	0	0	0	0	0	0	0	0	0	0	0	0	0	0	0	0	0	0.00106958	0	0	0	0	0	0
ZOTU7754	0	0	0	0	0	0	0	0	0	0	0	0	0	0	0	0	0	0	0	0	0	0	4.8674e-05	0	0	0	0	0	0	0	4.99092e-06	0	0	0	0	0	0	0	0	0	0	1.14458e-05	0	0	0	4.53402e-05	0.00028708	0.000433557	0
ZOTU5070	0.000593465	0	0	0	0	0.000573335	0	0	0	0	0	0	0	0	0	0	0	0	1.2672e-05	0	0	0	0	0	0	0	0	0	0	0	0	0	0	0	2.06203e-05	0	0	0	0	0	0	0	0	0	0	0	0	0	0
ZOTU3850	0	0	0	0	0	0	4.68763e-05	0	0	0	0	0	0	0	0	0	0	0	0	0	0	0	0	0	0	0	0	0	0	0	0	0	0	5.24634e-05	0.00103101	3.58809e-05	0	0	3.25733e-05	0	0	0	0	0	0	0	0	0	0
ZOTU4655	0	0	0.000674606	0.000361402	0	0	0	0	0	0	0	0	0	0	0	0	0	0	0	0	0	0	8.11234e-06	3.2299e-05	0	0	0	0	0	0	0	0	0	0	0	0	0	0	0	0	0	0	0	0	0	0	0	8.43028e-05	0
ZOTU2840	0.000109004	0	0	0	0	7.35045e-05	3.51572e-05	0	0	0	0	0	0	0	0	0	0	0	0	0	0	0	0	0	0	0	0	0	0	0	0	0	0	0.000100555	0	3.58809e-05	0	0	0.000840391	0	0	0	0	0	0	0	0	0	0
ZOTU9491	3.63346e-05	0	0	0	0	0.000470429	4.68763e-05	0	0	0	0	0	0	0	0	0	0	0	0	3.44857e-05	0	0	0	0	0	0	0	0	0	0	0	0	0	4.37195e-06	8.2481e-05	0	0	3.06038e-05	0.000488599	0	0	0	0	0	0	0	0	0	0
ZOTU3569	0	0	0	0	0	0	5.85954e-05	0.000164376	0	0	0	0	0	0	0	0	0	0	2.5344e-05	0	0	0	0	0	0	0	0	0	0	0	0	0	0	0	2.06203e-05	0.000161464	3.7262e-05	0	0	0	0.000725476	0	0	0	0	0	0	0	0
ZOTU7660	0	0	0	0	0	0.000294018	4.68763e-05	0	0	0	0	0	0	0	0	0	0	0.000574223	0	0	0	0	0	0	0	0	0	0	0	0	0	0	0	0	8.2481e-05	1.79404e-05	0	0	0.000175896	0	0	0	0	0	0	0	0	0	0
ZOTU6276	0	0	0	1.80701e-05	0	0.000191112	3.51572e-05	0	0	0	0	0	0	0	0	0	0	0	0	0	0	0	0	0	0	0	0	0	0	0	0	0	0	0.000463426	0.000185582	0.000107643	0	0	0.000188925	0	0	0	0	0	0	0	0	0	0
ZOTU5269	0.000981033	0.000208267	0	0	0	0	0	0	0	0	0	0	0	0	0	0	0	0	0	0	0	0	0	0	0	0	0	0	0	0	0	0	0	0	0	0	0	0	0	0	0	0	0	0	0	0	0	0	0
ZOTU3829	0	0	0	0	0	0.000823251	0	0	0	0	0	0	0	0	0	0	0	0	0	0	0	0	0	0	0	0	0	0	0	0	0	0	0	0.000113671	0.000226823	0	2.48413e-05	0	0	0	0	0	0	0	0	0	0	0	0
ZOTU6486	0	0	0	0	0	0.000147009	0	5.71743e-05	0.000143328	1.40221e-05	0	0	0	0	0	0	0	0	0	0	0	0	0	0	0	0	0	0	2.94308e-05	0	0	0	0	2.18597e-05	0.000247443	0.000197345	0	0.000122415	0.000208469	0	0	0	0	0	0	0	0	0	0
ZOTU9735	0	0	0	0	0	0	0	0	0	0	0	0	0	0	0	0	0	0	0	0	0	0	0	0	2.23676e-05	6.21388e-05	0.00012306	2.18608e-05	0	0	0	0	0	0	0	0	0	0	0	0	0	0	0	0	0	0	0	0	0
ZOTU1797	0	0	0	0	0	4.41027e-05	2.34381e-05	0	0	0	0	0	0	0	0	0	0	0	0	0	0	0	0	0	0	0	0	0	0	0	0	0	0	0.00104052	2.06203e-05	0	0	0	5.86319e-05	0	0	0	0	0	0	0	0	0	0
ZOTU2400	0	0	0	0	0	0.000102906	3.51572e-05	0	0	0	0	0	0	0	0	0	0	0	0	0	0	0	0	0	0	0	0	0	0	0	0	0	0	0.000441567	0.000371165	5.38213e-05	0	0	0.00018241	0	0	0	0	0	0	0	0	0	0
ZOTU4919	0	0	0	0	0	0.000191112	2.34381e-05	0.000164376	7.1664e-05	7.71215e-05	0	0	0	0	0	0	0	0	0	0	0	0	0	0	0	0	0	0	5.88616e-05	0	7.48637e-05	0	1.84737e-05	2.62317e-05	0.000226823	8.97022e-05	4.96827e-05	0	0	0	0	1.14458e-05	0	0.00010322	0	0	0	0	0
ZOTU3871	0	0	0	0	0	0.00032342	0	0	7.1664e-05	0	0	0	0	0	0	0	0	0	0	0	0	0	0	0	0	0	0	0	0	0	0	0	0	0.000148646	0.000103101	8.97022e-05	0	0	0.000449511	0	0	0	0	0	0	0	0	0	0
ZOTU7229	6.05576e-05	5.39953e-05	0	0	0	0	0	0.000135789	0	0	0	0	0	0	0	0	0	0.000185233	5.06881e-05	8.62143e-05	0	0	8.11234e-06	0	0	0	0	0	2.94308e-05	0	1.99637e-05	3.01265e-05	0	4.37195e-06	0.000247443	3.58809e-05	0.000111786	1.02013e-05	1.9544e-05	0	9.80373e-05	0	0	0	0	0	0	0	0
ZOTU4454	0	0	0	0	0	0	0	0	0	0	0	0	0	0	0	0	0	0	0	0	0	0	0	0	0	0	0	0	0	0	0	0	0	0	0.00076295	0.00039469	0	0	2.60586e-05	0	0	0	0	0	0	0	0	0	0
ZOTU2714	0	0	0	0	0	0	0	0	0	0	0	0	0	0	0	0	0	0	0	0	0	0	0	0	0	0	0	0	0	0	0	0	0	0	0	0	0	0	0	0	0	0	0	0	0	0	0.000269138	4.8173e-05	0
ZOTU2742	0	0	0	0	0	0.000367523	2.34381e-05	0	0	0	0	0	0	0	0	0	0	0	0	0	0	0	0	0	0	0	0	0	0	0	0	0	0	0.000279805	0.000453646	5.38213e-05	0	0	0	0	0	0	0	0	0	0	0	0	0
ZOTU9641	0.000266454	0	0	0	0	0.000573335	0.000234381	2.14404e-05	0	0	0	0	0	0	0	0	0	0	0	0	0	0	0	0	0	0	0	0	0	0	0	0	0	0	8.2481e-05	0	0	0	0	0	0	0	0	0	0	0	0	0	0
ZOTU5069	0	0	0	0	0	1.47009e-05	0.000281258	1.42936e-05	0	0	0	0	0	0	0	0	0	0.00011114	2.5344e-05	0	0	0	0	0	0	0	0	0	0	0	0	0	0	7.86951e-05	0.000329924	0.000233226	3.7262e-05	0	5.21173e-05	0	0	0	0	0	0	0	0	0	0
ZOTU3320	0	0	0	0	0	0	5.85954e-05	0.000257284	0.00035832	0.000168265	0	0	0	0	0	0	0	0	0	0	0	0	0	0	0	0	0	0	0	0	0	0	0	0	0	0	0.000173889	0.000102013	0	0	0	5.72292e-05	0	0	0	0	0	0	0
ZOTU8869	0	0	0	0	0	0	7.03144e-05	0.000135789	0	0.000140221	0	0	0	0	0	0	0	0	0	0	0	0	0	0	0	0	0	0	0	0	0	0	0	0	0	0.000233226	0.000136627	3.06038e-05	0	0	0	2.28917e-05	0.000342813	0	0	0	0	0	0
ZOTU5484	0	0	0	0	0	5.88036e-05	0	0	0	0	0	0	0	0	0	0	0	0.0011114	0	0	0	0	0	0	0	0	0	0	0	0	0	0	0	0	0	0	0	0	0	0	0	0	0	0	0	0	0	0	0
ZOTU9369	0	0	0	0	0	0.000294018	5.85954e-05	1.42936e-05	0	0	0	0	0	0	0	0	0	0	0	0	0	0	0	0	0	0	0	0	0	0	0	0	0	0	0.000144342	0.000107643	7.4524e-05	0	0	0	0.000313719	0	0	0.000162204	0	0	0	0	0
ZOTU4230	0	0	0	0	0	0.000220514	0.000468763	0	0	0	0	0	0	0	0	0	0	0	0	0	0	0	0	0	0	0	0	0	0	0	0	0	0	0	0.000144342	0.000143524	0.000124207	2.04025e-05	0	0	0	4.57834e-05	0	0	0	0	0	0	0
ZOTU3395	0	0	0	0	0	0.000205813	0	0	0	0	0	0	0	0	0	0	0	0	0	0	0	0	0	0	0	0	0	0	0	0	0	0	0	8.7439e-05	0.000350544	0.000143524	0	0	0.00037785	0	0	0	0	0	0	0	0	0	0
ZOTU5926	0	0	0.000289117	0	0	0	0	0	0	0	0	0	0	0	0	0	0	0	0	0	0	0	0.000803122	7.26727e-05	0	0	0	0	0	0	0	0	0	0	0	0	0	0	0	0	0	0	0	0	0	0	0	0	0
ZOTU7282	0.000133227	0	0	0	0	0	5.85954e-05	0	0	5.60884e-05	0	0	0	0	0	0	0	0.000203757	0.000152064	0	0	0	0	0	0	0	0	0	1.47154e-05	0	0	0	0	3.49756e-05	8.2481e-05	7.17618e-05	1.24207e-05	6.12076e-05	3.25733e-05	0	0	5.72292e-05	0	0.000191695	0	0	0	0	0
ZOTU7063	0	0	0	0	0	0	0	1.42936e-05	0.000143328	0.000112177	0	0	0	0	0	0	0	0	0	0	0	0	0	0	0	0	0	0	5.88616e-05	3.85394e-05	9.98183e-05	0.000170717	0.000369474	0	0	0	1.24207e-05	0.000142818	0	0	0	0	0	0	0	0	0	0	0
ZOTU5017	0	0	0	0	0	0.000264616	2.34381e-05	0	0	0	0	0	0	0	0	0	0	0	0	0	0	0	8.11234e-06	0	0	0	0	0	0	0	0	0	0	0	0.000329924	0.000520273	1.24207e-05	0	0	0	0	0	0	0	0	0	0	0	0
ZOTU4062	0	0	0	0	0	0	0	0	0.000214992	0	0	0	0	0	0	0	0	0	0	0	0	0	0	0	0	0	0	0	0	0	0	0	0	0	0	0	0	0	0	0	0	0	0	0.00094373	0	0	0	0	0
ZOTU3624	0	0	0	0	0	0	0.00012891	5.00275e-05	0	0	0	0	0	0	0	0	0	0	0	0	0	0	0	0	0	0	0	0	0	0	0	0	0	0	0	0	7.4524e-05	1.02013e-05	0	0	0.000117645	6.8675e-05	0	0.000707798	0	0	0	0	0
ZOTU5291	0	0	0	0	0	0.000837952	4.68763e-05	0	0	0	0	0	0	0	0	0	0	0	0	0	0	0	0	0	0	0	0	0	0	0	0	0	0	0.000109299	0.000144342	1.79404e-05	0	0	0	0	0	0	0	0	0	0	0	0	0
ZOTU3970	0	0	0	0	0	0.000235215	0	0	0	0	0	0	0	0	0	0	0	0	0	0	0	0	0	0	0	0	0	0	0	0	0	0	0	0.000139902	0.00076295	1.79404e-05	0	0	0	0	0	0	0	0	0	0	0	0	0
ZOTU9551	0	0	0	0	0	0	4.68763e-05	0	0	0	0	0	0	0	0	0	0	0	0	0	0	0	0	0	0	0	0	0	0	0	0	0	0	9.18109e-05	0.000515506	7.17618e-05	0	0	0.000429967	0	0	0	0	0	0	0	0	0	0
ZOTU5035	0.000581353	0	0	0	0	8.82055e-05	0.000175786	2.14404e-05	0	0	0	0	0	0	0	0	0	0	5.06881e-05	0	0	0	0	0	0	0	0	0	0	0	0	0	0	0.000166134	4.12405e-05	1.79404e-05	1.24207e-05	0	0	0	0	0	0	0	0	0	0	0	0
ZOTU8266	0	0	0	0	0	0.00048513	7.03144e-05	0	0	0	0	0	0	0	0	0	0	0	0	0	0	0	0	0	0	0	0	0	0	0	0	0	0	0.000209853	0.000206203	3.58809e-05	6.21033e-05	0	8.46906e-05	0	0	0	0	0	0	0	0	0	0
ZOTU3327	0	0	0	0	0	0	9.37526e-05	5.00275e-05	0.000214992	0	0	0	0	0	0	0	0	0	0	0	0	0	0	0	0	0	0	0	0	0	3.49364e-05	0	0	6.99512e-05	0.000453646	0.000143524	4.96827e-05	2.04025e-05	0	0	0	2.28917e-05	0	0	0	0	0	0	0
ZOTU6238	0	0	0	0	0	0.000294018	0	0	0	0	0	0	0	0	0	0	0	7.40933e-05	0	0	0	0	0	0	0	0	0	0	0	0	0	0	0	0.000139902	0	0	0	0	0.000488599	0	0.00015686	0	0	0	0	0	0	0	0
ZOTU5882	0	0	0	0	0	0.000264616	2.34381e-05	0	0	0	0	0	0	0	0	0	0	0	0	0	0	0	0	0	0	0	0	0	0	0	0	0	0	0.000284177	0.000103101	0.000125583	0	0	0.000351792	0	0	0	0	0	0	0	0	0	0
ZOTU4112	0	0	0	0	0	0	0	0	0	3.50552e-05	0	0	0	0	0	0	0	0	0	0	0	0	0	0	0	0	0	0	5.88616e-05	5.7809e-05	0	0	0	0	0	0	0	0	0	0	0	4.57834e-05	0.000946165	0	0	0	0	0	0
ZOTU7903	0	0	0	0	0	0	0	0	0	0	0	0	0	0	0	0	0	0	0	0	0	0	0	0	0	0	0	0	0.000426747	0.000558821	0	0	0.000129316	0	0	3.58809e-05	0	0	0	0	0	0	0	0	0	0	0	0	0
ZOTU8634	0	0	0	0	0	0.000132308	0.000656268	5.00275e-05	0	0	0	0	0	0	0	0	0	0	0.000291457	0	0	0	0	0	0	0	0	0	0	0	0	0	0	0	0	0	0	2.04025e-05	0	0	0	0	0	0	0	0	0	0	0
ZOTU8913	0	0	0.000881118	0.000180701	0	0	0	0	0	0	0	0	0	0	0	0	0	0	6.33601e-05	0	0	0	2.4337e-05	0	0	0	0	0	0	0	0	0	0	0	0	0	0	0	0	0	0	0	0	0	0	0	0	0	0
ZOTU5180	0.000484461	0	0	0	0	0	0	0	0	0	0	0	0	0	0	0	0	0.00061127	5.06881e-05	0	0	0	0	0	0	0	0	0	0	0	0	0	0	0	0	0	0	0	0	0	0	0	0	0	0	0	0	0	0
ZOTU5467	0	0	0	0	0	0.00016171	0	0	0	0	0	0	0	0	0	0	0	0	0	0	0	0	0	0	0	0	0	0	0	0	0	0	0	0.000271061	0.000515506	0.000197345	0	0	0	0	0	0	0	0	0	0	0	0	0
ZOTU8501	0	0	0	0	0	0.000338121	4.68763e-05	0	0	0	0	0	0	0	0	0	0	0.000148187	7.60321e-05	0	0	0	0	0	0	0	0	0	0	0	0	0	0	0.00013553	0.000185582	0.000107643	0	0	8.46906e-05	0	0	2.28917e-05	0	0	0	0	0	0	0
ZOTU8603	0.000218007	0	0	0	0	0.000411625	1.17191e-05	0	0	0	0	0	0	0	0	0	0	0	0.000228096	0	0	0	0	0	0	0	0	0	0	0	0	0	0	0	0.000164962	7.17618e-05	3.7262e-05	0	0	0	0	0	0	0	0	0	0	0	0
ZOTU8613	0	0	0	0	0	0.000205813	8.20335e-05	0	0	0	0	0	0	0	0	0	0	0	0	0	0	0	8.11234e-06	0	0	0	0	0	0	0	0	0	0	3.93475e-05	0.000144342	3.58809e-05	0	0	0	0	0.000627439	0	0	0	0	0	0	0	0
ZOTU4671	6.05576e-05	0	0	0	0	7.35045e-05	0.000492201	0.000150083	0	0	0	0	0	0	0	0	0	0	0.000152064	0	0	0	0	0	0	0	0	0	0	0	0	0	0	2.62317e-05	8.2481e-05	1.79404e-05	8.69446e-05	0	0	0	0	0	0	0	0	0	0	0	0
ZOTU5335	9.68922e-05	0	0	0	0	0	0	0	0	0	0	0	0	0	0	0	0	0.00027785	0	0	0	0	0	0	0	0	0	0	0	0	0	0	0	0	0.000371165	0.000358809	3.7262e-05	0	0	0	0	0	0	0	0	0	0	0	0
ZOTU3439	0	0	0	0	0	0.000117607	0	7.14679e-05	0	0	0	0	0	0	0	0	0	0	0	0	0	0	0	0	0	0	0	0	0	0	0	0	0	1.74878e-05	8.2481e-05	3.58809e-05	0.000409882	7.14089e-05	5.86319e-05	0	0	0.0002747	0	0	0	0	0	0	0
ZOTU4535	0	0	0	0	0	0.000411625	8.20335e-05	0	0	0	0	0	0	0	0	0	0	0	0	0	0	0	0	0	0	0	0	0	0	0	0	0	0	0.000362872	8.2481e-05	8.97022e-05	0	0	0.000110749	0	0	0	0	0	0	0	0	0	0
ZOTU6132	0	0	0	0	0	0	0	0	0	0	0	0	0	0	0	0	0	0	0	0	0	0	0	0	0	0	0	0	0	0	0	0	0	0	0	0	0	0	0	0	0	0	0	0	0	2.26701e-05	8.07414e-05	0	0
ZOTU9672	0	0	0	0	0	0.00016171	4.68763e-05	0	0	0	0	0	0	0	0	0	0	0.00072241	6.33601e-05	0	0	0	0	0	0	0	0	0	0	0	0	0	0	0	8.2481e-05	3.58809e-05	2.48413e-05	0	0	0	0	0	0	0	0	0	0	0	0
ZOTU4760	0	0	0	0	0	0.000249915	7.03144e-05	0	0	0	0	0	0	0	0	0	0	0	2.5344e-05	0	0	0	0	0	0	0	0	0	0	0	0	0	0	0.000196738	0.000433025	0.000161464	0	0	0	0	0	0	0	0	0	0	0	0	0
ZOTU6221	1.21115e-05	0	0	0	0	0.000147009	0.000398448	4.28807e-05	0	0	0	0	0	0	0	0	0	7.40933e-05	2.5344e-05	0	0	0	0	0	0	0	0	0	0	0	0	0	0	1.74878e-05	0.000226823	0.000107643	7.4524e-05	1.02013e-05	0	0	0	0	0	0	0	0	0	0	0
ZOTU3733	3.63346e-05	0.00108762	0	0	0	0	0	0	0	0	0	0	0	0	0	0	0	0	0	0	0	0	8.11234e-06	0	0	0	0	0	0	0	0	0	0	0	0	0	0	0	0	0	0	0	0	0	0	0	0	0	0
ZOTU4778	0	0	0	0	0	0.000543934	0.000105472	0	0	0	0	0	0	0	0	0	0	0	0	0	0	0	0	0	0	0	0	0	0	0	0	0	0	0.000144274	0.000247443	8.97022e-05	0	0	0	0	0	0	0	0	0	0	0	0	0
ZOTU6371	0	0	0	0	0	0.000147009	4.68763e-05	2.85872e-05	0	0	0	0	0	0	0	0	0	0	0	0	0	0	0	0	0	0	0	0	0	0	0	0	0	0.000323524	0.000371165	8.97022e-05	1.24207e-05	0	0.000110749	0	0	0	0	0	0	0	0	0	0
ZOTU5088	0	0	0	0	0	0	0.000210943	0.00042166	0	0	0	0	0	0	0	0	0	0	6.33601e-05	0	0	0	0	0	0	0	0	0	0	0	0	0	0	0	0	0.000107643	0.000161469	0.00016322	0	0	0	0	0	0	0	0	0	0	0
ZOTU8491	0	0	0	0	0	7.35045e-05	3.51572e-05	0.000264431	7.1664e-05	7.01105e-06	0	0	0	0	0	0	0	0	6.33601e-05	0.000189672	0	0	0	0	0	0	0	0	0	7.70787e-05	0	0	0	0	0	0	7.4524e-05	0.000224428	0	0	0	4.57834e-05	0	0	0	0	0	0	0
ZOTU4185	0	0	4.13024e-05	0.000144561	0	0	0	0	0	0	0	0	0	0	0	0	0	0	0	0	0	0	3.24494e-05	3.2299e-05	0.000726947	8.69943e-05	6.15301e-05	0	0	0	0	0	0	0	0	0	0	0	0	0	0	0	0	0	0	0	0	0	0
ZOTU6124	0	0	0	0	0	0	0	0	0	0	0	0	0	0	0	0	0	0	0	0	0	0	0	0	0	0	0	0	0	0	0	0	0	0	0	0	0	0	0	0	0	0	0	0	0	0	0.000699759	0	0
ZOTU4807	0	0	0	0	0	5.88036e-05	9.37526e-05	4.28807e-05	0	0	0	0	0	0	0	0	0	0	0.00025344	0	0	0	0	0	0	0	0	0	0	0	0	0	0	0	0.000247443	0.000269107	0.000136627	2.04025e-05	0	0	0	0	0	0	0	0	0	0	0
ZOTU3325	0	0	0	0	0	0.000249915	0	0	0	0	0	0	0	0	0	0	0	0	0	0	0	0	0	0	0	0	0	0	0	0	0	0	0	0.000345384	0.000371165	3.58809e-05	0	0	0.000117264	0	0	0	0	0	0	0	0	0	0
ZOTU6669	0	0	0	0	0	0	0	0	0	0	0	0	0	0	0	0	0	0	0	0	0	0	0	0	0	0	0	0	0	0	0	0	0	0.000773835	0.000309304	3.58809e-05	0	0	0	0	0	0	0	0	0	0	0	0	0
ZOTU9073	0	0	0	0	0	0	0	0	0	0	0	0	0	0	0	0	0	0	0	0	0	0	0	0	0	0	0	0	0	0	0	0	0	0	0	0	0	0	0	0	0	0	0	0	0	0	0.000879184	0	0
ZOTU4026	0	0	0	0	0	0	0	0	0	0	0	0	0	0	0	0	0	0	3.80161e-05	0	0	0	0	0	0	0	0	0	0	0	0	0	0	0	2.06203e-05	0	9.93653e-05	2.04025e-05	0.000156352	0	0	6.8675e-05	0.000713052	0	0	0	0	0	0
ZOTU1837	0	0	0	0	0	0.000102906	0	0	0	0	0	0	0	0	0	0	0	0	0	0	0	0	0	0	0	0	0	0	0	0	0	0	0	0.000813182	0.000144342	5.38213e-05	0	0	0	0	0	0	0	0	0	0	0	0	0
ZOTU8989	0	0	0	0	0	0.000661541	0	0	0	0	0	0	0	0	0	0	0	0	0	0	0	0	0	0	0	0	0	0	0	0	0	0	0	0	2.06203e-05	0.000430571	0	0	0	0	0	0	0	0	0	0	0	0	0
ZOTU6212	0	0	0	0	0	0	0	0.000135789	0	0	0	0	0	0	0	0	0	0	0	0	0	0	0	0	0	0	0	0	0	0.00059736	0	0	0	0	0	0	0	0.000285636	0	0	0	9.15667e-05	0	0	0	0	0	0	0
ZOTU6646	0	0	0	0	0	0.000411625	0.000234381	0	0	7.01105e-06	0	0	0	0	0	0	0	0	0	0	0	0	0	0	0	0	0	0	0	0	0	0	0	0	0.000226823	8.97022e-05	4.96827e-05	7.14089e-05	1.9544e-05	0	0	0	0	0	0	0	0	0	0
ZOTU2326	0	0.00110305	0	0	0	0	0	0	0	7.01105e-06	0	0	0	0	0	0	0	0	0	0	0	0	0	0	0	0	0	0	0	0	0	0	0	0	0	0	0	0	0	0	0	0	0	0	0	0	0	0	0
ZOTU3702	1.21115e-05	0	0.000302884	7.22804e-05	0	0	0	0	0	0	0	0	0	0	0	0	0	0	0	0	0.000682098	0	2.4337e-05	1.61495e-05	0	0	0	0	0	0	0	0	0	0	0	0	0	0	0	0	0	0	0	0	0	0	0	0	0
ZOTU5905	0	0	0	0	0	2.94018e-05	0.000269539	4.28807e-05	0	0	0	0	0	0	0	0	0	0	0	0	0	0	0	0	0	0	0	0	0	0	0	0	0	0	0.000123722	3.58809e-05	2.48413e-05	0	2.60586e-05	0	0.000117645	1.14458e-05	0.000397663	2.94916e-05	0	0	0	0	0
ZOTU9407	0	0	0	0	0	0	0.000316415	0.000171523	0.000143328	0	0	0	0	0	0	0	0	0.000240803	0	0	0	0	0	0	0	0	0	0	0	0	0	0	0	0	0	7.17618e-05	0.000111786	5.10064e-05	0	0	0	0	0	0	0	0	0	0	0
ZOTU3496	0.00109004	0	0	0	0	0	0	0	0	0	0	0	0	0	0	0	0	0	0	0	0	0	1.62247e-05	0	0	0	0	0	0	0	0	0	0	0	0	0	0	0	0	0	0	0	0	0	0	0	0	0	0
ZOTU5974	0.000205896	0	0	0	0	0.000396925	1.17191e-05	0	0	0	0	0	0	0	0	0	0	0	2.5344e-05	0	0	0	0	0	0	0	0	0	0	0	0	0	0	3.93475e-05	0.000185582	7.17618e-05	2.48413e-05	2.04025e-05	3.25733e-05	0	0	9.15667e-05	0	0	0	0	0	0	0
ZOTU4281	0.000411792	0	0	0	0	0	0	0	0	0	0	0	0	0	0	0	0	0.0005557	6.33601e-05	0	0	0	1.62247e-05	8.07474e-06	0	0	0	0	4.41462e-05	0	0	0	0	0	0	0	0	0	0	0	0	0	0	0	0	0	0	0	0
ZOTU3628	0.000920476	0	0	0	0	0	0	0	0	0	0	0	0	0	0	0	0	0	0	0	0	0	0	0	0	0	0	0	0	0	0	0	0	0	0.000103101	7.17618e-05	0	0	0	0	0	0	0	0	0	0	0	0	0
ZOTU4110	0.000145338	0.00094106	0	0	0	0	0	0	0	0	0	0	0	0	0	0	0	0	0	0	0	0	8.11234e-06	0	0	0	0	0	0	0	0	0	0	0	0	0	0	0	0	0	0	0	0	0	0	0	0	0	0
ZOTU5624	0	0	0	0	0	1.47009e-05	0.00025782	0.000493128	0.000143328	1.40221e-05	0	0	0	0	0	0	0	0	0	0	0	0	0	0	0	0	0	0	0	0	0	0	0	0	0	0	0.000149048	2.04025e-05	0	0	0	0	0	0	0	0	0	0	0
ZOTU6101	0	0	0	0	0	0.000235215	0	0	0	0	0	0	0	0	0	0	0	0	0	0	0	0	0	0	0	0	0	0	0	0	0	0	0	0.000174878	0.000556747	0.000125583	0	0	0	0	0	0	0	0	0	0	0	0	0
ZOTU3300	0	0	0	0	0	0.000441027	9.37526e-05	0	0	0	0	0	0	0	0	0	0	0	6.33601e-05	0	0	0	0	0	0	0	0	0	0	0	0	0	0	4.80914e-05	0	0.000125583	0	0	0.000319218	0	0	0	0	0	0	0	0	0	0
ZOTU3082	0	0	0	0	0	0	0.000234381	0	0	0	0	0	0	0	0	0	0	0	0	0	0	0	0	0	0	0	0	0	0	0	0	0	0	0	0	0	0	2.04025e-05	0.000462541	0	0.000372542	0	0	0	0	0	0	0	0
ZOTU1695	0	0	0	0	0	0	0	0	0	0	0	0	0	0	0	0	0	0	0	0	0	0	0	0	0	0	0	0	0	0	0	0	0	0.00102741	6.18608e-05	0	0	0	0	0	0	0	0	0	0	0	0	0	0
ZOTU3894	0	0	0	0	0	0	0	0	0	0	0	0	0	0	0	0	0	0.000351943	0.000443521	0	0	0	0	0	0	0	0	0	0	0	0	0	0	0	8.2481e-05	0.000107643	0	0	0	0	0	0.000103013	0	0	0	0	0	0	0
ZOTU5995	0	0	0	0	0	0	0	0	0	0.000154243	0	0	0	0	0	0	0	0	0	0	0	0	0	0	0	0	0	0	0.000103008	0.000423933	0.000334391	7.02952e-05	0	0	0	0	0	0	0	0	0	0	0	0	0	0	0	0	0
ZOTU7565	0	0	0	0	0	0.000191112	0.000222662	5.00275e-05	0	0	0	0	0	0	0	0	0	1.85233e-05	0	0	0	0	0	0	0	0	0	0	0	0	0	0	0	0	0.000185582	0.000215285	1.24207e-05	2.04025e-05	0.000169381	0	0	0	0	0	0	0	0	0	0
ZOTU8853	0	0	0	0	0	0	0	0	0	3.50552e-05	0	0	0	0	0	0	0	0	0	0	0	0	0	0	0	0	0	0	0	0	0	0	0	0	0	3.58809e-05	1.24207e-05	6.12076e-05	1.30293e-05	0	0	0.000103013	0.000466226	0.000353899	0	0	0	0	0
ZOTU4357	0	0	0	0	0	0.00032342	1.17191e-05	0	0	0	0	0	0	0	0	0	0	0	0.000266112	0	0	0	0	0	0	0	0	0	0	0	0	0	0	5.68353e-05	0.000391785	1.79404e-05	1.24207e-05	0	0	0	0	0	0	0	0	0	0	0	0
ZOTU4322	0	0	0	0	0	0.000249915	3.51572e-05	0	0	0	0	0	0	0	0	0	0	0	0	0	0	0	0	0	0	0	0	0	0	0	0	0	0	0.00031478	0.000350544	3.58809e-05	0	4.08051e-05	5.21173e-05	0	0	0	0	0	0	0	0	0	0
ZOTU5369	0.000169561	0	0	0	0	0	0.000105472	0	0	0	0	0	0	0	0	0	0	0	5.06881e-05	0	0	0	0	0	0	0	0	0	0	0	0	0	0	3.49756e-05	0.000412405	0.000304987	0	0	0	0	0	0	0	0	0	0	0	0	0
ZOTU8153	0	0	0	0	0	0.000396925	0.000105472	5.71743e-05	7.1664e-05	0	0	0	0	0	0	0	0	0	0	0	0	0	0	0	0	0	0	0	0	0	0	0	0	0	2.06203e-05	0.000161464	7.4524e-05	0	5.21173e-05	0	0.000137252	0	0	0	0	0	0	0	0
ZOTU2428	0	0.000501385	0	0	0	0	0	0	0	0	0	0	0	0	0	0	0	0	0	0	0	0	0	0	0	0	0	0	0	0	0	0	0	0.000214225	0.000268063	5.38213e-05	0	0	3.90879e-05	0	0	0	0	0	0	0	0	0	0
ZOTU4725	8.47807e-05	0	0	0	0	0	4.68763e-05	0	0	0	0	0	0	0	0	0	0	0	0.000354817	0	0	0	0	0	0	0	0	0	0	0	0	0	0	0	0.000206203	0.000358809	2.48413e-05	0	0	0	0	0	0	0	0	0	0	0	0
ZOTU5753	0.00015745	0	0	0	0	0	0	0	0	0	0	0	0	0	0	0	0	0.000740933	0.000114048	0	0	0	0	0	0	0	0	0	0	0	0	0	0	0	6.18608e-05	0	0	0	0	0	0	0	0	0	0	0	0	0	0
ZOTU3736	0	0	0	0	0	0	0	0	0.000143328	0.000126199	0	0	0	0	0	0	0	0	0	0	0	0	0	0	0	0	0	0	0	3.85394e-05	0	0	0	0	0	0	1.24207e-05	8.16102e-05	0	0	0	0	0.000671914	0	0	0	0	0	0
ZOTU3756	0	0	0	0	0	0	0	0	0.000143328	0.000357564	0	0	0	0	0	0	0	0	0	0	0	0	0	0	0	0	0	0	0	0	0	0	0	0	0	0	0	8.16102e-05	0	0	0	0.000309038	0	0	0	0	0	0	0
ZOTU4900	0	0	0	0	0	2.94018e-05	1.17191e-05	0	0	0	0	0	0	0	0	0	0	0	0	0	0	0	0	0	0	0	0	0	0	0	0	0	0	0	4.12405e-05	0.000107643	0	2.04025e-05	0	0	0.000862728	0	0	0	0	0	0	0	0
ZOTU9750	0	0	0	0	0	0	1.17191e-05	2.85872e-05	0	0.000280442	0	0	0	0	0	0	0	0	0	3.44857e-05	0	0	0	0	0	0	0	0	0.0001913	0.000231236	0.000149727	0	0	0	0	1.79404e-05	7.4524e-05	5.10064e-05	0	0	0	0	0	0	0	0	0	0	0
ZOTU6738	0	0	0	0	0	0.000558635	0	0	0	0	0	0	0	0	0	0	0	0	0	0	0	0	0	0	0	0	0	0	0	0	0	0	0	0	6.18608e-05	0.000107643	0.00018631	0	0.000156352	0	0	0	0	0	0	0	0	0	0
ZOTU7984	0	0	0	0	0	0	0.0002461	0.000278725	7.1664e-05	3.50552e-05	0	0	0	0	0	0	0	0	0	0	0	0	0	0	0	0	0	0	0	0	0	0	0	4.37195e-06	4.12405e-05	0.000179404	0	0.000214227	0	0	0	0	0	0	0	0	0	0	0
ZOTU4562	0	0	0	0	0	0	0	0	0	0	0	0	0	0	0	0	0	0	0	0	0	0	0	0	0	0	0	0	0	0	0	0	0	0	0	0	0	0	0	0	0.000333327	0	0	0.000737289	0	0	0	0	0
ZOTU4280	0	0	0	0	0	0.000132308	0	0	0	0	0	0	0	0	0	0	0	0.000796503	0	0	0	0	0	0	0	0	0	0	0	0	0	0	0	0	0.000123722	1.79404e-05	0	0	0	0	0	0	0	0	0	0	0	0	0
ZOTU6876	0	0	0	0	0	0.000279317	1.17191e-05	3.57339e-05	0	0	0	0	0	0	0	0	0	0	3.80161e-05	0	0	0	8.11234e-06	0	0	0	0	0	0	0	0	0	0	5.68353e-05	0.000536127	0	0	0	0.000104235	0	0	0	0	0	0	0	0	0	0
ZOTU3538	0	0	0	0	0	0.000573335	0.000421887	0	0	0	0	0	0	0	0	0	0	0	0	0	0	0	0	0	0	0	0	0	0	0	0	0	0	0	2.06203e-05	5.38213e-05	0	0	0	0	0	0	0	0	0	0	0	0	0
ZOTU7740	0	0	0	0	0	0	0	0	7.1664e-05	1.40221e-05	0	0	0	0	0	0	0	0	0	5.17286e-05	0	0	0	0	0	0	0	0	1.47154e-05	1.92697e-05	0	2.00844e-05	0	8.7439e-06	2.06203e-05	1.79404e-05	0.000136627	4.08051e-05	6.51466e-06	0	7.84298e-05	8.01209e-05	0	0	0	0	0	0	0
ZOTU5966	0	0	0	0	0	0	0	0	0	0	0	0	0	0	0	0	0	0	0	0	0	0	0	0	0	0	0	0	0	0	0	0	0	0	0	0	0	0	0	0	0	0	0	0	0	0	4.48563e-05	0.000782812	0
ZOTU3560	0	0	0	0	0	0.000382224	0.000550796	0.000128642	0	0	0	0	0	0	0	0	0	0	0	0	0	0	0	0	0	0	0	0	0	0	0	0	0	0	0	0	0	0	0	0	0	0	0	0	0	0	0	0	0
ZOTU2440	0	0	0	0	0	0	0	0	0	0	0	0	0	0	0	0	0	0	0	0	0	0	0	0	0	0	0	0	0	0	0	0	0	0.000279805	0	0	0	0	0.000781759	0	0	0	0	0	0	0	0	0	0
ZOTU9243	0	0	0	0	0	0	0	0	0	9.11436e-05	0	0	0	0	0	0	0	0	0	0	0	0	0	0	0	0	0	0	7.3577e-05	0	0	0	0	0	0	1.79404e-05	0	5.10064e-05	0	0	0	0	0.000548501	8.84747e-05	0.000147338	0	0	0	0
ZOTU7337	0	0	0	0	0	0	0.000210943	0	0.000286656	0	0	0	0	0	0	0	0	0	0	0	0	0	0	0	0	0	0	0	0	0	0	0	0	0	0.000144342	3.58809e-05	0.00037262	1.02013e-05	0	0	0	0	0	0	0	0	0	0	0
ZOTU5161	0.000436015	0	0	0	0	0.000132308	4.68763e-05	0.00017867	0	0	0.00016852	0	0	0	0	0	0	0	0	0	0	0	0	0	0	0	0	0	0	0	0	0	0	0	0	3.58809e-05	6.21033e-05	0	0	0	0	0	0	0	0	0	0	0	0
ZOTU4038	0.00015745	0	0	0	0	0	0	0	0	0	0	0	0	0	0	0	0	0.000889119	1.2672e-05	0	0	0	0	0	0	0	0	0	0	0	0	0	0	0	0	0	0	0	0	0	0	0	0	0	0	0	0	0	0
ZOTU7527	0	0	0	0	0	0	0	0	7.1664e-05	0.000210331	0	0	0	0	0	0	0	0	6.33601e-05	0	0	0	0	0	0	0	0	0	0	0	0	0	0	0	0	0	4.96827e-05	6.12076e-05	0	0	0	0.000263254	0	0	0	0	0	0	0
ZOTU3257	0	0	0	0	0	0	0	0	0	0	0	0	0	0	0	0	0	0	0	0	0	0	0	0	0	0	0	0	0	0	0	0	0	0	0	0	0	0	0	0.000842407	0.000215682	0	0	0	0	0	0	0	0
ZOTU8314	0	0	0	0	0	0.000617438	5.85954e-05	0	0	0	0	0	0	0	0	0	0	0	0	0	0	0	0	0	0	0	0	0	0	0	0	0	0	0	0.000164962	0	0	0	0.000214984	0	0	0	0	0	0	0	0	0	0
ZOTU8531	0	0	0	0	0	0	0	0	0	2.80442e-05	0	0	0	0	0	0	0	0	0.000139392	0.000155186	0	0	0	0	0	0	0	0	0	0	0	0	0	4.37195e-06	0.000268063	0.000107643	8.69446e-05	7.14089e-05	0	0	0	0.000194579	0	0	0	0	0	0	0
ZOTU7236	0	0	0	0	0	5.88036e-05	0	0	0	0	0	0	0	0	0	0	0	0	0	0	0	0	0	0	0	0	0	0	0	0	0	0	0	0.00031478	2.06203e-05	3.58809e-05	0	0	0.000625407	0	0	0	0	0	0	0	0	0	0
ZOTU3187	0	0	1.37675e-05	0	0	0	0	0	0	0	0	0	0	0	0	0	0	0	0	0	0	0	7.30111e-05	0.000242242	0.000514455	0.000186416	2.46121e-05	0	0	0	0	0	0	0	0	0	0	0	0	0	0	0	0	0	0	0	0	0	0
ZOTU4969	0	0	0	0	0	0.000338121	2.34381e-05	0	0	0	0	0	0	0	0	0	0	0	0	0	0	0	0	0	0	0	0	0	0	0	0	0	0	0.000231713	0.000226823	0.000161464	0	0	7.16612e-05	0	0	0	0	0	0	0	0	0	0
ZOTU4896	0	0	0	0	0	0.000308719	3.51572e-05	0	0	0	0	0	0	0	0	0	0	0	0	0	0	0	0	0	0	0	0	0	0	0	0	0	0	0.000410963	8.2481e-05	0	0	0	7.81759e-05	0	0.000137252	0	0	0	0	0	0	0	0
ZOTU3743	0.000109004	0.000123418	0	0	0	2.94018e-05	0.000175786	0	0	0	0	0	0	0	0	0	0	0.000185233	0.000316801	0	0	0	0	0	0	0	0	0	0	0	0	0	0	0	4.12405e-05	7.17618e-05	0	0	0	0	0	0	0	0	0	0	0	0	0
ZOTU8524	0	0	0	0	0	0.000396925	5.85954e-05	0	0	0	0	0	0	0	0	0	0	0	0	0	0	0	0	0	0	0	0	0	0	0	0	0	0	0	0.000412405	0.000125583	0	0	5.86319e-05	0	0	0	0	0	0	0	0	0	0
ZOTU4294	0.000327011	0	0	0	0	0	0	0	0	0	0	0	0	0	0	0	0	0.00044456	0.000177408	0	0	0	0	0	0	0	0	0	0	0	0	0	0	0	0.000103101	0	0	0	0	0	0	0	0	0	0	0	0	0	0
ZOTU6635	0	0	0	0	0	0.000249915	4.68763e-05	0	0	0	0	0	0	0	0	0	0	0	0	0	0	0	0	0	0	0	0	0	0	0	0	0	0	8.7439e-05	0.000144342	0.000340868	0	0	0.00018241	0	0	0	0	0	0	0	0	0	0
ZOTU2390	0	0	0	0	0	0	0	0	0	0	0	0	0	0	0	0	0	0	0	0	0	0	0	0	0	0	0	0	0.000132439	7.70787e-05	0.000648819	0	5.54211e-05	0	0	0	0	0	0	0	0	0	0	0	0	6.80102e-05	0	0	0
ZOTU6781	0	0	0	0	0	0.000735045	5.85954e-05	0	0	0	0	0	0	0	0	0	0	0	0	0	0	0	0	0	0	0	0	0	0	0	0	0	0	0	0.000123722	0.000125583	0	0	6.51466e-06	0	0	0	0	0	0	0	0	0	0
ZOTU8817	0	0	0	0	0	4.41027e-05	0	0	0	0	0	0	0	0	0	0	0	0	0	0	0	0	0	0	0	0	0	0	0	0	0	0	0	0.000284177	0	0	6.21033e-05	0	0.00065798	0	0	0	0	0	0	0	0	0	0
ZOTU4500	0	0	0	0	0	0	0	0	0	0	0	0	0	0	0	0	0	0	0	0	0	0	0	0	0	0	0	0	0	0	0	0	0	0.000113671	0.000701089	0.000233226	0	0	0	0	0	0	0	0	0	0	0	0	0
ZOTU8315	0	0	0	0	0	0	0	0	7.1664e-05	0.000105166	0	0	0	0	0	0	0	0	0	0	0	0	0	0	0	0	0	0	0.000382601	0	0.000124773	0	0.000203211	0	0	0	0	4.08051e-05	0	0	0	0	0	0	0	0	1.79425e-05	0	0
ZOTU5428	0	0	0	0	0	7.35045e-05	8.20335e-05	0	0	0	0	0	0	0	0	0	0	0	0	0	0	0	0	0	0	0	0	0	0	0	0	0	0	3.93475e-05	0.000226823	1.79404e-05	0	0	9.77199e-05	0	0.000509794	0	0	0	0	0	0	0	0
ZOTU9681	0.000666134	0	0	0	0	0	0	0	0	0	0	0	0	0	0	0	0	0.00033342	3.80161e-05	0	0	0	8.11234e-06	0	0	0	0	0	0	0	0	0	0	0	0	0	0	0	0	0	0	0	0	0	0	0	0	0	0
ZOTU6749	0	0	0	0	0	0	0	0	0	0	0	0	0	0	0	0	0	0	0.000316801	0	0	0	0	0	0	0	0	0	0	0	0	0	0	0	0.000453646	0.000107643	4.96827e-05	0	0	0	0.000117645	0	0	0	0	0	0	0	0
ZOTU5791	0	0	0	0	0	0.000220514	5.85954e-05	1.42936e-05	0	7.01105e-06	0	0	0	0	0	0	0	0	6.33601e-05	0	0	0	0	0	0	0	0	0	0	0	0	0	0	9.61829e-05	0.000206203	0.000125583	0	0	0.00019544	0	0	5.72292e-05	0	0	0	0	0	0	0
ZOTU6512	0	0	0	0	0	0	0	0	0	7.01105e-06	0	0	0	0	0	0	0	0	0	0	0	0	0	0	0	0	0	0	0.000147154	0	0	0	0	3.49756e-05	0.000226823	1.79404e-05	0.000260834	0.000122415	0	0	0	3.43375e-05	0	0.000191695	0	0	0	0	0
ZOTU4764	0	0	0	0	0	0.000205813	7.03144e-05	0	7.1664e-05	2.10331e-05	0	0	0	0	0	0	0	0	5.06881e-05	0	0	0	0	0	0	0	0	0	0	0	0	0	0	6.55792e-05	0.000247443	8.97022e-05	8.69446e-05	0.000122415	0	0	0	1.14458e-05	0	0	0	0	0	0	0
ZOTU3253	0	0	0	0	0	0.00048513	0	0	0	0	0	0	0	0	0	0	0	0	0	0	0	0	0	0	0	0	0	0	0	0	0	0	0	0.000454683	0.000103101	0	0	0	0	0	0	0	0	0	0	0	0	0	0
ZOTU2628	0	0	0	0	0	0.000102906	0	0	0	0	0	0	0	0	0	0	0	0	0	0	0	0	0	0	0	0	0	0	0	0	0	0	0	0.000301664	0.000412405	3.58809e-05	0	0	0.000188925	0	0	0	0	0	0	0	0	0	0
ZOTU6579	0	0	0	0	0	0	0	0	0	0	0	0	0	0	0	0	0	0.000407513	0	0	0	0	0	0	0	0	0	0	0	0	0	0	0	0	0	0	0	0	2.60586e-05	0	0.000607831	0	0	0	0	0	0	0	0
ZOTU1863	0	0	0	0	0	0	0	0	0	0	0	0	0	0	0	0	0	0	0	0	0	0	0	0	0	0	0	0	0	0	0	0	0	0	0	0	3.7262e-05	0	0	0.00100361	0	0	0	0	0	0	0	0	0
ZOTU6611	0	0	0	0	0	0.000294018	0	0	0	0	0	0	0	0	0	0	0	0	0	0	0	0	0	0	0	0	0	0	0	0	0	0	0	8.7439e-05	2.06203e-05	0	0	0	0.000638436	0	0	0	0	0	0	0	0	0	0
ZOTU9177	0	0	0	0	0	7.35045e-05	2.34381e-05	8.57615e-05	0	0	0	0	0	0	0	0	0	0	0	0	0	0	0	0	0	0	0	0	0	0	8.98365e-05	0	0	0	0.000659848	0.000107643	0	0	0	0	0	0	0	0	0	0	0	0	0
ZOTU5010	0	0	0	0	0	0.000793849	3.51572e-05	0	0	0	0	0	0	0	0	0	0	0	0	0	0	0	0	0	0	0	0	0	0	0	0	0	0	0	0.000103101	0.000107643	0	0	0	0	0	0	0	0	0	0	0	0	0
ZOTU5746	0.000629799	0	0	0	0	0	0	0	0	0	0.000409264	0	0	0	0	0	0	0	0	0	0	0	0	0	0	0	0	0	0	0	0	0	0	0	0	0	0	0	0	0	0	0	0	0	0	0	0	0	0
ZOTU6187	0	0	0	0	0	0.000176411	4.68763e-05	0.000371633	0	0	0	0	0	0	0	0	0	0	0	0	0	0	0	0	0	0	0	0	0	0	0	0	0	7.43231e-05	0	0	3.7262e-05	0	0.000332248	0	0	0	0	0	0	0	0	0	0
ZOTU4512	0	0	0	0	0	0	0	0	0	2.10331e-05	0	0	0	0	0	0	0	0	0	0	0	0	0	0	0	0	0	0	0	0.000693708	0	0	0	0	0	0.000322928	0	0	0	0	0	0	0	0	0	0	0	0	0
ZOTU9104	0	0	0	0	0	0	0	3.57339e-05	0	7.01105e-05	0	0	0	0	0	0	0	0	2.5344e-05	0	0	0	0	0	0	0	0	0	7.3577e-05	7.70787e-05	2.49546e-05	0.000210886	7.38948e-05	3.06036e-05	0	0	9.93653e-05	4.08051e-05	0	0	0.000274504	0	0	0	0	0	0	0	0
ZOTU5150	0	0	1.37675e-05	0	0	0	0	0	0	0	0	0	0	0	0	0	0	0	0	0	0	0	0	0	0	0	0	0	0	0	0	0	0	0	0	0	0	0	0	0	0	0	0	0	0	0	0	0.000313125	0
ZOTU4040	0	0	0	0	0	0	0	0	0	0	0	0	0	0	0	0	0	0	0	0	0	0	0	0	0	0	0	0	5.88616e-05	0	0.000733665	2.00844e-05	0.000221684	0	0	0	0	0	0	0	0	0	0	0	0	0	0	0	0
ZOTU6378	0	0	0	1.80701e-05	0	0	0	0	0	0	0	0	0	0	0	0	0	0	0	0	0	0	0	0	0	0	0	0	0	0	0	0	0	0.000974944	4.12405e-05	0	0	0	0	0	0	0	0	0	0	0	0	0	0
ZOTU6946	0	0	0	0	0	7.35045e-05	0	0	0	0	0	0	0	0	0	0	0	0	0	0	0	0	0	0	0	0	0	0	0	0	0	0	0	0	0.000453646	0.000233226	0	0	0.000273616	0	0	0	0	0	0	0	0	0	0
ZOTU2581	0	0	0	0	0	0	0	0	0	0	0	0	0	0	0	0	0	0	0	0	0	0	0	0	0	0	0	0	0	0	0	0	0	8.7439e-06	0	5.38213e-05	0	0	0.000970684	0	0	0	0	0	0	0	0	0	0
ZOTU9762	0	0	0	0	0	0.000396925	0.00012891	0	0	0	0	0	0	0	0	0	0	0	0	0	0	0	0	0	0	0	0	0	0	0	0	0	0	0	0.000185582	5.38213e-05	0	0	0.000208469	0	5.88224e-05	0	0	0	0	0	0	0	0
ZOTU3506	0	0	0	0	0	0	0	0	0	1.40221e-05	0	0	0	0	0	0	0	0	0	0	0	0	0	0	0	0	0	0	0	0.000134888	5.9891e-05	0	0	0	0	0	2.48413e-05	3.06038e-05	0	0	0	0.000251808	0	0.000516102	0	0	0	0	0
ZOTU4270	0	0	0	0	0	2.94018e-05	0.000105472	0.000185816	0	0	0	0	0	0	0	0	0	0	2.5344e-05	0	0	0	0	0	0	0	0	0	0	0	0	0	0	1.31158e-05	8.2481e-05	8.97022e-05	4.96827e-05	0	0	0	0.000450972	0	0	0	0	0	0	0	0
ZOTU7361	0	0	0	0	0	0.000573335	1.17191e-05	0	0	0	0	0	0	0	0	0	0	9.26166e-05	0	0	0	0	0	0	0	0	0	0	0	0	0	0	0	0.000257945	8.2481e-05	0	0	0	1.30293e-05	0	0	0	0	0	0	0	0	0	0
ZOTU2690	0	0	0	0	0	0.000470429	0	0	0	0	0	0	0	0	0	0	0	0	0	0	0	0	0	0	0	0	0	0	0	0	0	0	0	0.000332268	0.000226823	0	0	0	0	0	0	0	0	0	0	0	0	0	0
ZOTU2703	0	0	0	0	0	0	0	0	0	0	0	0	0	0	0	0	0	0	0	0	0	0	0.000770672	0.000242242	1.11838e-05	0	0	0	0	0	0	0	0	0	0	0	0	0	0	0	0	0	0	0	0	0	0	0	0
ZOTU7588	0	5.39953e-05	0	0	0	1.47009e-05	0.000339853	1.42936e-05	0	0	0	0	0	0	0	0	0	0	8.87042e-05	0	0	0	0	0	0	0	0	0	2.94308e-05	0	0	0	0	0	4.12405e-05	0.000143524	4.96827e-05	5.10064e-05	0	0	0.000196075	0	0	0	0	0	0	0	0
ZOTU4734	0	0	0	0	0	0	2.34381e-05	0	0	0	0	0	0	0	0	0	0	0	0	0	0	0	0	0	0	0	0	0	0	0	0	0	0	0	0	0.000215285	3.7262e-05	0	0	0	0.000745083	0	0	0	0	0	0	0	0
ZOTU2681	0	0	0	0	0	0	0	0	7.1664e-05	0.000112177	0	0	0	0	0	0	0	0	0	0	0	0	0	0	0	0	0	0	0	0	0	0	0	0	0	1.79404e-05	1.24207e-05	1.02013e-05	0	0	0	0.000103013	0	0.00126814	0	0	0	0	0
ZOTU3564	0	0	0	0	0	0.000191112	0	0	0	0	0	0	0	0	0	0	0	0	0	0	0	0	0	0	0	0	0	0	0	0	0	0	0	0.000319152	0.000123722	3.58809e-05	1.24207e-05	0	0	0	0.00023529	0.000103013	0	0	0	0	0	0	0
ZOTU4441	0	0	0	0	0	0	0	7.14679e-06	0	0	0	0	0	0	0	0	0	0	0	0	0	0	0	0	0	0	0	0	0	0	0	0	0	0	0	0	1.24207e-05	0	0	0	0	0	0.00100101	0	0	0	0	0	0
ZOTU4410	0	0	0	0	0	0.000676242	0	0	0	0	0	0	0	0	0	0	0	0	0	0	0	0	0	0	0	0	0	0	0	0	0	0	0	0.00017925	0.000164962	0	0	0	0	0	0	0	0	0	0	0	0	0	0
ZOTU3085	0	0	0	0	0	0	0	0	0	0	0	0	0	0	0	0	0	0	0	0	0	0	0	0	0	0	0	0	1.47154e-05	7.70787e-05	0.000748637	3.01265e-05	0.00014779	0	0	0	0	0	0	0	0	0	0	0	0	0	0	0	0
ZOTU3405	0	0	0.000564466	0.000108421	0	0	0	0	0	0	0	0	0	0	0	0	0	0	0	0	0	0	0.00027582	5.65232e-05	0	1.24278e-05	0	0	0	0	0	0	0	0	0	0	0	0	0	0	0	0	0	0	0	0	0	0	0
ZOTU8543	0	0	0	0	0	0.000220514	0.000105472	0	0	0	0	0	0	0	0	0	0	0.00011114	0	0	0	0	0	0	0	0	0	0	0	0	0	0	0	0.000109299	0.000247443	5.38213e-05	0	0	0.000169381	0	0	0	0	0	0	0	0	0	0
ZOTU2769	0	0	0	0	0	0.000705644	0.000105472	0	0	0	0	0	0	0	0	0	0	0	0	0	0	0	0	0	0	0	0	0	0	0	0	0	0	0.000122415	8.2481e-05	0	0	0	0	0	0	0	0	0	0	0	0	0	0
ZOTU4968	0	0	0	0	0	0	1.17191e-05	9.29082e-05	0	0	0	0	0	0	0	0	0	0	0	0	0	0	0	0	0	0	0	0	0	0	0	0	0	0	0	0	7.4524e-05	4.08051e-05	0	0	0	0	0.000795327	0	0	0	0	0	0
ZOTU5099	4.84461e-05	0	0	5.42103e-05	0	0	0	0	0	0	0	0	0	0	0	0	0	0.000759456	0	0	0	0	4.05617e-05	0	0	0	0	0	0	0	0	0	0	0	4.12405e-05	0	1.24207e-05	0	5.86319e-05	0	0	0	0	0	0	0	0	0	0
ZOTU8510	0.000254342	0	0	0	0	0	0	0	0	0	0	0	0	0	0	0	0	0.00050013	0	0	0	0	0	0	0	0	0	0	0	0	0	0	0	0.000153018	8.2481e-05	0	2.48413e-05	0	0	0	0	0	0	0	0	0	0	0	0
ZOTU3956	0	0	0	0	0	0	0	0	0	0	0	0	0	0	0	0	0	0	0	0	0	0	0	0	0	0	0	0	0	0	0	0	0	0	0.000845431	0	0	0	0.000169381	0	0	0	0	0	0	0	0	0	0
ZOTU6692	0	0	0	0	0	0	0	0	0	0	0	0	0	0	0	0	0	0	0	0	0	0	0	0	0	0	0	0	5.88616e-05	7.70787e-05	8.48456e-05	0.000210886	0	0	0	1.79404e-05	0	0	0	0	0	0	0	0	0.000564796	0	0	0	0
ZOTU8926	0	0	0	0	0	0.000191112	0.000152348	0.000114349	0	1.40221e-05	0	0	0	0	0	0	0	0	0.000228096	0	0	0	0	0	0	0	0	0	0	0	0	0	0	0	0.000144342	0.000107643	6.21033e-05	0	0	0	0	0	0	0	0	0	0	0	0
ZOTU5655	0	0	0	0	0	0	0	0	0	0	0	0	0	0	0	0	0	0	0	0	0	0	0	0	0	0	0	0	0	0	0	0	0	0	0	0	0	0	0	0	0	0	0	0	0	0.000124685	5.38276e-05	0.000409471	0
ZOTU4003	0	0	0	0	0	0	0.000339853	0.000121495	0	0	0	0	0	0	0	0	0	0	0	0	0	0	0	0	0	0	0	0	0	0	3.99273e-05	0	0	4.37195e-06	0	3.58809e-05	0	0	0	0	0.000470579	0	0	0	0	0	0	0	0
ZOTU9416	0	0	0	0	0	0	0	0	0	0	0	0	0	0	0	0	0	0	0	0	0	0	0	0	0	0	0	0	0	0	0.000788565	0.00014059	7.38948e-05	0	0	0	0	0	0	0	0	0	0	0	8.18545e-06	0	0	0	0
ZOTU6177	0.000230119	0	0	0	0	0	0	0	0	0	0	0	0	0	0	0	0	0.000518653	0	0	0	0	0	0	0	0	0	0	0	0	0	0	0	0	2.06203e-05	0	0	0	8.46906e-05	0	0.00015686	0	0	0	0	0	0	0	0
ZOTU6428	0.000133227	0	0	0	0	0	0	0	0	0	0	0	0	0	0	0	0	0.000796503	0	0	0	0	0	0	0	0	0	0	0	0	0	0	0	0	0	5.38213e-05	0	0	2.60586e-05	0	0	0	0	0	0	0	0	0	0
ZOTU4761	0.000254342	0	0	0	0	0	0	0	0	0	0	0	0	0	0	0	0	0.000481606	5.06881e-05	0	0	0	0	0	0	0	0	0	0	0	0	0	0	0	0.000185582	3.58809e-05	0	0	0	0	0	0	0	0	0	0	0	0	0
ZOTU3343	0	0	0	0	0	0	0	0	0	0	0	0	0	0	0	0	0	0	0	0	0	0	0	0	0	0	0	0	0	0	0	0	0	0	0	0	0	0	0	0	0	0	0	0	0	0	0	0.000325168	0
ZOTU1760	0	0	0	0	0	0	0	0	0	0	0	0	0	0	0	0	0	0	0	0	0	0	0	0	0	0	0	0	5.88616e-05	0	0.000948274	0	0	0	0	0	0	0	0	0	0	0	0	0	0	0	0	0	0
ZOTU4507	9.68922e-05	0	0	0	0	0.000235215	0	0	0	0	0	0	0	0	0	0	0	0	0	0	0	0	0	0	0	0	0	0	0	0	0	0	0	0.00017925	0	8.97022e-05	0	0	0.000403909	0	0	0	0	0	0	0	0	0	0
ZOTU9144	0	0	0	0	0	0.000382224	1.17191e-05	0	0	0	0	0	0	0	0	0	0	0	0	0	0	0	0	0	0	0	0	0	0	0	0	0	0	0.00033664	0.000144342	1.79404e-05	0	0	0.000110749	0	0	0	0	0	0	0	0	0	0
ZOTU6102	1.21115e-05	0	0	0	0	0	4.68763e-05	0	0	0	0	0	0	0	0	0	0	0.000203757	0.000215424	0	0	0	0	0	0	0	0	0	0	0	0	0	0	0	0.000226823	1.79404e-05	6.21033e-05	1.02013e-05	0	0	0.000196075	1.14458e-05	0	0	0	0	0	0	0
ZOTU4676	0	0	0	0	0	0	0	0	0	0	0	0	0	0	0	0	0	0	0	0	0	0	0	0	0	0	0	0	0	0	0	0	0	0	0.000948532	5.38213e-05	0	0	0	0	0	0	0	0	0	0	0	0	0
ZOTU8413	0	0	0	0	0	0	8.20335e-05	1.42936e-05	7.1664e-05	7.71215e-05	0	0	0	0	0	0	0	0	0	0	0	0	0	0	0	0	0	0	0	0	0	0	0	0	0.000164962	0.000520273	0	7.14089e-05	0	0	0	0	0	0	0	0	0	0	0
ZOTU4643	0.000278565	0	0	0	0	0	0	0	0	0	0	0	0	0	0	0	0	0.000648316	6.33601e-05	0	0	0	0	0	1.11838e-05	0	0	0	0	0	0	0	0	0	0	0	0	0	0	0	0	0	0	0	0	0	0	0	0
ZOTU7391	0	0	0	0	0	0.000676242	0.000105472	2.14404e-05	0	0	0	0	0	0	0	0	0	0	0	0	0	0	0	0	0	0	0	0	0	0	0	0	0	3.93475e-05	0	5.38213e-05	0	2.04025e-05	8.46906e-05	0	0	0	0	0	0	0	0	0	0
ZOTU5085	0	0	0	0	0	8.82055e-05	0.000269539	0.000207257	0	1.40221e-05	0	0	0	0	0	0	0	0.000314896	0	0	0	0	0	0	0	0	0	0	0	0	0	0	0	0	2.06203e-05	1.79404e-05	3.7262e-05	3.06038e-05	0	0	0	0	0	0	0	0	0	0	0
ZOTU6015	0	0	0	0	0	0.000294018	0.000140629	0	0	0	0	0	0	0	0	0	0	0	0	0	0	0	0	0	0	0	0	0	0	0	0	0	0	9.61829e-05	0.000309304	3.58809e-05	0	0	0.000123779	0	0	0	0	0	0	0	0	0	0
ZOTU2352	0	0	0	0	0	0	0	0	0	0	0	0	0	0	0	0	0	0	0	0	0	0	0.000876133	6.45979e-05	5.5919e-05	0	0	0	0	0	0	0	0	0	0	0	0	0	0	0	0	0	0	0	0	0	0	0	0
ZOTU4601	0	0	0	0	0	0	1.17191e-05	1.42936e-05	0	5.60884e-05	0	0	0	0	0	0	0	0	0	0	0	0	0	0	0	0	0	0	0	0	0	3.01265e-05	0	0	0	0	0.000161469	0	0	0	0	0	0	0.000722543	0	0	0	0	0
ZOTU8628	0	0	0	0	0	0.000279317	8.20335e-05	0	0	0	0	0	0	0	0	0	0	0	3.80161e-05	0	0	0	0	0	0	0	0	0	0	0	0	0	0	6.55792e-05	0.000123722	7.17618e-05	1.24207e-05	0	1.9544e-05	0	0	0	0.000301676	0	0	0	0	0	0
ZOTU5398	9.68922e-05	0	0	0	0	0	0.000328134	0	0	0	0	0	0	0	0	0	0	0.000314896	0.00025344	0	0	0	0	0	0	0	0	0	0	0	0	0	0	0	0	0	0	0	0	0	0	0	0	0	0	0	0	0	0
ZOTU6997	0	0	0	0	0	8.82055e-05	5.85954e-05	0.000164376	0.000143328	0	0	0	0	0	0	0	0	0	0	0	0	0	0	0	0	0	0	0	0	5.7809e-05	0	0	0	0	4.12405e-05	5.38213e-05	0.000385041	0	0	0	0	0	0	0	0	0	0	0	0
ZOTU7143	0	0	0	0	0	0.000352822	0	0	0.000143328	0	0	0	0	0	0	0	0	0	0	0	0	0	0	0	0	0	0	0	0	0	0	0	0	7.86951e-05	0	0	0	0	0.000416938	0	0	0	0	0	0	0	0	0	0
ZOTU4817	0	0	0	0	0	0	0.00037501	4.28807e-05	0	7.01105e-06	0	0	0	0	0	0	0	0	0.000215424	0	0	0	0	0	0	0	0	0	0	0	0	0	0	0	2.06203e-05	0	0	2.04025e-05	0	0	0	0	0	0.000309661	0	0	0	0	0
ZOTU6574	0	0	0	0	0	0	0	0	0	0	0	0	0	0	0	0	0	0.00072241	0	0	0	0	8.11234e-06	0	0	0	0	0	0	0	0	0	0	7.43231e-05	2.06203e-05	0	0	0	0.000162866	0	0	0	0	0	0	0	0	0	0
ZOTU6010	0	0	0	0	0	0.000735045	0.000105472	7.14679e-06	0	0	0	0	0	0	0	0	0	0	0	0	0	0	0	0	0	0	0	0	0	0	0	0	0	1.74878e-05	2.06203e-05	8.97022e-05	1.24207e-05	0	0	0	0	0	0	0	0	0	0	0	0
ZOTU5163	9.68922e-05	0	0	0	0	0	0	0	0	0	0	0	0	0	0	0	0	0.00066684	0	0.000224157	0	0	0	0	0	0	0	0	0	0	0	0	0	0	0	0	0	0	0	0	0	0	0	0	0	0	0	0	0
ZOTU7240	0.000436015	0	0	0	0	0.000279317	0	0	0	0	0	0	0	0	0	0	0	0.000148187	3.80161e-05	0	0	0	0	0	0	0	0	0	0	0	0	0	0	0	6.18608e-05	1.79404e-05	0	0	6.51466e-06	0	0	0	0	0	0	0	0	0	0
ZOTU3193	0	0	0	0	0	5.88036e-05	2.34381e-05	0	0	0	0	0	0	0	0	0	0	0	0	0	0	0	0	0	0	0	0	0	0	0	0	0	0	0.000419707	0	3.58809e-05	0	0	0.000449511	0	0	0	0	0	0	0	0	0	0
ZOTU4554	0	0	0	0	0	0	0	0	7.1664e-05	0.000175276	0	0	0	0	0	0	0	0	0	0	0	0	0	0	0	0	0	0	0.000103008	0.000192697	0	0	0	0	0	0	0	0.000408051	0	0	0	3.43375e-05	0	0	0	0	0	0	0
ZOTU2050	0	0	0	0	0	7.35045e-05	1.17191e-05	0	0	0	0	0	0	0	0	0	0	0	0	0	0	0	0	0	0	0	0	0	0	0	0	0	0	0.000778207	0.000103101	1.79404e-05	0	0	0	0	0	0	0	0	0	0	0	0	0
ZOTU4697	0	0	0	0	0	0.000499831	3.51572e-05	0	0	0	0	0	0	0	0	0	0	0	0	0	0	0	0	0	0	0	0	0	0	0	0	0	0	0.000183622	0.000247443	1.79404e-05	0	0	0	0	0	0	0	0	0	0	0	0	0
ZOTU5544	0	0	0	0	0	7.35045e-05	0.000105472	4.28807e-05	0	0	0	0	0	0	0	0	0	0	1.2672e-05	0	0	0	0	0	0	0	0	0	0	0	0	0	0	0	4.12405e-05	3.58809e-05	6.21033e-05	0.000122415	0	0.000468004	1.96075e-05	0	0	0	0	0	0	0	0
ZOTU6873	0	0	0	0	0	0.000147009	3.51572e-05	0	0	0	0	0	0	0	0	0	0	0	0	0	0	0	0	0	0	0	0	0	0	0	0	0	0	4.37195e-06	0.000742329	5.38213e-05	0	0	0	0	0	0	0	0	0	0	0	0	0
ZOTU9682	0	0	0	0	0	0.000117607	0	6.43211e-05	0	0	0	0	0	0	0	0	0	0	0	0	0	0	0	0	0	0	0	0	0	0	0	0	0	0.000310408	0.000164962	3.58809e-05	0	0	0.000286645	0	0	0	0	0	0	0	0	0	0
ZOTU6694	0.000193784	0	0	0	0	0	0	0	0	0	0	0	0	0	0	0	0	0.00072241	6.33601e-05	0	0	0	0	0	0	0	0	0	0	0	0	0	0	0	0	0	0	0	0	0	0	0	0	0	0	0	0	0	0
ZOTU5727	7.26691e-05	0	0	0	0	0.000117607	7.03144e-05	0	0	0	0	0	0	0	0	0	0	0	0	0	0	0	0	0	0	0	0	0	0	0	0	0	0	0.000244829	0.000288684	0	0	0	0.000162866	0	0	0	0	0	0	0	0	0	0
ZOTU2629	0	0	0	0	0	0	0	0.000907642	7.1664e-05	0	0	0	0	0	0	0	0	0	0	0	0	0	0	0	0	0	0	0	0	0	0	0	0	0	0	0	0	0	0	0	0	0	0	0	0	0	0	0	0
ZOTU7748	0.000375457	0	0	0	0	0	0	0	0	0	0	0	0	0	0	0	0	0.000463083	0	0	0	0	0	0	0	0	0	0	0	0	0	0	0	7.43231e-05	2.06203e-05	0	0	0	4.56026e-05	0	0	0	0	0	0	0	0	0	0
ZOTU6194	0	0	0	0	0	8.82055e-05	0.000140629	0	0	3.50552e-05	0	0	0	0	0	0	0	0	0	0	0	0	0	0	0	0	0	0	0.000235446	9.63484e-05	4.99092e-05	0	0	3.49756e-05	0.000185582	0	0.000111786	0	0	0	0	0	0	0	0	0	0	0	0
ZOTU4249	0	0	0	0	0	0.000558635	0	0	0	0	0	0	0	0	0	0	0	0	0	0	0	0	0	0	0	0	0	0	0	0	0	0	0	0	0.000309304	0.000107643	0	0	0	0	0	0	0	0	0	0	0	0	0
ZOTU7581	0	0	0	0	0	2.94018e-05	1.17191e-05	0	0	0	0	0	0	0	0	0	0	0	0	0	0	0	0	0	0	0	0	0	0	0	0	0	0	0	0.000206203	0.00039469	0	0	0.000273616	0	5.88224e-05	0	0	0	0	0	0	0	0
ZOTU3678	0	0	0	0	0	1.47009e-05	0.000175786	0	0	0	0	0	0	0	0	0	0	0	0.000240768	0	0	0	0	0	0	0	0	0	0	0	0	0	0	0	0.000494886	3.58809e-05	1.24207e-05	0	0	0	0	0	0	0	0	0	0	0	0
ZOTU3227	0	0	0	0	0	0	0	0.000500275	0	0	0	0	0	0	0	0	0	0	0	0	0	0	0	0	0	0	0	0	0	0	0.0001098	0.000170717	0	0	0	0	0.000111786	8.16102e-05	0	0	0	0	0	0	0	0	0	0	0
ZOTU6641	0	0	0	0	0	7.35045e-05	5.85954e-05	0	0	1.40221e-05	0	0	0	0	0	0	0	0	0	0	0	0	0	0	0	0	0	0	0	0.000211966	0	0	0	0.000297292	8.2481e-05	0.000197345	1.24207e-05	0	6.51466e-06	0	1.96075e-05	0	0	0	0	0	0	0	0
ZOTU4366	0	0	0	0	0	0	0	0	0	0	0	0	0	0	0	0	0	0	0	0	0	0	0	0	0	0	0	0	0	0	0	0	0	0.000122415	0.000742329	0.000107643	0	0	0	0	0	0	0	0	0	0	0	0	0
ZOTU6622	0	0	0	0	0	4.41027e-05	0.000187505	7.14679e-06	0	0	0	0	0	0	0	0	0	0	8.87042e-05	0	0	0	0	0	0	0	0	0	0	0	0	0	0	0	0.000206203	0	0	0	0.000123779	0	0.000313719	0	0	0	0	0	0	0	0
ZOTU1792	0	0	0	0	0	0	0	0	0	0	0	0	0	0	0	0	0	0	0	0	0	0	0	0	0	0	0	0	0	0	0	0	0	0.000751975	0.000185582	0	0	0	3.25733e-05	0	0	0	0	0	0	0	0	0	0
ZOTU4977	0.000169561	0	0	0	0	0.000279317	0	0	0	0	0	0	0	0	0	0	0	0	0	0	0	0	0	0	0	0	0	0	0	0	0	0	0	0	0	0	0	0	0.000521173	0	0	0	0	0	0	0	0	0	0
ZOTU3009	0	0	0	0	0	0.000147009	0	0	0	0	0	0	0	0	0	0	0	0	0	0	0	0	0	0	0	0	0	0	0	0	0	0	0	0.000253573	0.000515506	5.38213e-05	0	0	0	0	0	0	0	0	0	0	0	0	0
ZOTU3940	0.000666134	0	0	0	0	0	0	0	0	0	0	0	0	0	0	0	0	0.000240803	2.5344e-05	0	0	0	0	0	0	0	0	0	0	0	0	0	0	0	0	3.58809e-05	0	0	0	0	0	0	0	0	0	0	0	0	0
ZOTU6729	0	0	0	0	0	0	0	0	0.000214992	3.50552e-05	0	0	0	0	0	0	0	0	0	0	0	0	0	0	0	0	0	0	0	0	1.49727e-05	0.000291223	0	0	0	0.000107643	1.24207e-05	0.00016322	0	0	0	0.000125904	0	0	0	0	0	0	0
ZOTU9492	3.63346e-05	0	0	0	0	0.00032342	0	0.000250138	0	7.01105e-06	0	0	0	0	0	0	0	0	0	0	0	0	0	0	0	0	0	0	0	0	0	0	0	9.18109e-05	4.12405e-05	0.000215285	0	0	0	0	0	0	0	0	0	0	0	0	0
ZOTU8984	0	0	0	0	0	0.000396925	7.03144e-05	0	0	0	0	0	0	0	0	0	0	0.000314896	1.2672e-05	0	0	0	0	0	0	0	0	0	0	0	0	0	0	0	6.18608e-05	0.000107643	0	0	0	0	0	0	0	0	0	0	0	0	0
ZOTU4342	0	0	0	0	0	0.000279317	1.17191e-05	0.000414514	0	0	0	0	0	0	0	0	0	0	0	0	0	0	0	0	0	0	0	0	0	0	9.98183e-05	0	0	0	0	0.000125583	1.24207e-05	2.04025e-05	0	0	0	0	0	0	0	0	0	0	0
ZOTU6300	0	0	0	0	0	0.000220514	0.000105472	0	0	0	0	0	0	0	0	0	0	0	0.000177408	0	0	0	0	0	0	0	0	0	0	0	0	0	0	0.000100555	0.000226823	5.38213e-05	0	0	7.81759e-05	0	0	0	0	0	0	0	0	0	0
ZOTU4078	0	0	0	0	0	0.000220514	0	0	0	0	0	0	0	0	0	0	0	0	0	0	0	0	0	0	0	0	0	0	0	0	0	0	0	0.000126786	0.000123722	0	0	2.04025e-05	0	0	0.000470579	0	0	0	0	0	0	0	0
[truncated: 1,506 more rows]
[truncated: 17 more columns]
